# Supplementary material for: Evaluating NetMHCpan performance on non-European HLA alleles not present in training data
Source: Front Immunol. 2024 Jan 16;14:1288105. doi: 10.3389/fimmu.2023.1288105 (PMC10825027; doi:10.3389/fimmu.2023.1288105)
Supplement: Supplementary Data Sheet 3 — Raw data for Figures 2 and 3. [file DataSheet_3.xlsx]

## Sheet: NetMHCpan-4.1 Results
Peptide	Score_EL	Core	rank	info	allele	correction_factor	log_rank	information_corrected_log_rank	information_corrected_rank	corrected_auprc	uncorrected_auprc	Training Data Exists
LTELLERAAFY	0.758633	LTEERAAFY	0.00897872	13.2422	HLA-A*01:01	-0.20273	-2.04679	-1.84406	0.01432	0.546832	0.875122	Yes
ASDKETYELRY	0.971632	ASDKETLRY	0.00323404	13.2422	HLA-A*01:01	-0.20273	-2.49025	-2.28752	0.00515793	0.546832	0.875122	Yes
VADKVHLMY	0.991397	VADKVHLMY	0.000953191	13.2422	HLA-A*01:01	-0.20273	-3.02082	-2.81809	0.00152023	0.546832	0.875122	Yes
LVDPWTPHLY	0.991846	LVDPTPHLY	0.000876596	13.2422	HLA-A*01:01	-0.20273	-3.0572	-2.85447	0.00139807	0.546832	0.875122	Yes
LSEERVWEY	0.97447	LSEERVWEY	0.00298723	13.2422	HLA-A*01:01	-0.20273	-2.52473	-2.322	0.0047643	0.546832	0.875122	Yes
FIDVDDERWHY	0.886138	FVDDERWHY	0.00688511	13.2422	HLA-A*01:01	-0.20273	-2.16209	-1.95936	0.010981	0.546832	0.875122	Yes
LLDDAQRLLY	0.98434	LLDDAQLLY	0.00187234	13.2422	HLA-A*01:01	-0.20273	-2.72762	-2.52489	0.00298617	0.546832	0.875122	Yes
YTDLLRLFEY	0.979138	YTDLLRLEY	0.00253617	13.2422	HLA-A*01:01	-0.20273	-2.59582	-2.39309	0.0040449	0.546832	0.875122	Yes
FIDSQRVWAEY	0.738072	FIDSQRVEY	0.00919149	13.2422	HLA-A*01:01	-0.20273	-2.03661	-1.83388	0.0146594	0.546832	0.875122	Yes
TTDLFGRDLSY	0.986117	TTDGRDLSY	0.00165957	13.2422	HLA-A*01:01	-0.20273	-2.78	-2.57727	0.00264683	0.546832	0.875122	Yes
ADMGHLKY	0.425701	-ADMGHLKY	0.012766	13.2422	HLA-A*01:01	-0.20273	-1.89395	-1.69122	0.0203602	0.546832	0.875122	Yes
IADMGHLKY	0.985151	IADMGHLKY	0.00177872	13.2422	HLA-A*01:01	-0.20273	-2.74989	-2.54716	0.00283686	0.546832	0.875122	Yes
VTEITDDLHFY	0.964792	VTEDDLHFY	0.00375319	13.2422	HLA-A*01:01	-0.20273	-2.4256	-2.22287	0.00598591	0.546832	0.875122	Yes
RTEIIEDLAFY	0.827053	RTEEDLAFY	0.00806809	13.2422	HLA-A*01:01	-0.20273	-2.09323	-1.8905	0.0128677	0.546832	0.875122	Yes
KSDLFFHDY	0.924874	KSDLFFHDY	0.00568511	13.2422	HLA-A*01:01	-0.20273	-2.24526	-2.04253	0.00906709	0.546832	0.875122	Yes
YVDQAELEKY	0.977511	YVDQAELKY	0.00264681	13.2422	HLA-A*01:01	-0.20273	-2.57728	-2.37455	0.00422136	0.546832	0.875122	Yes
ATDGKVLLW	0.64293	ATDGKVLLW	0.0102298	13.2422	HLA-A*01:01	-0.20273	-1.99013	-1.7874	0.0163153	0.546832	0.875122	Yes
VTDGAILGKLY	0.980097	VTDGAILLY	0.00238298	13.2422	HLA-A*01:01	-0.20273	-2.62288	-2.42015	0.00380058	0.546832	0.875122	Yes
VVEQLKDWLY	0.714337	VVEQKDWLY	0.00942979	13.2422	HLA-A*01:01	-0.20273	-2.0255	-1.82277	0.0150394	0.546832	0.875122	Yes
VDPLSALKY	0.177931	VDPLSALKY	0.0191915	13.2422	HLA-A*01:01	-0.20273	-1.71689	-1.51416	0.0306082	0.546832	0.875122	Yes
NTEVLLSHLSY	0.886328	NTELSHLSY	0.0068766	13.2422	HLA-A*01:01	-0.20273	-2.16263	-1.9599	0.0109674	0.546832	0.875122	Yes
ISYGPDWKDFY	0.390737	ISYGPDDFY	0.0134128	13.2422	HLA-A*01:01	-0.20273	-1.87248	-1.66975	0.0213918	0.546832	0.875122	Yes
TSETPDYLLKY	0.960655	TSETPDLKY	0.00401702	13.2422	HLA-A*01:01	-0.20273	-2.3961	-2.19337	0.00640669	0.546832	0.875122	Yes
VLDVISLVDKY	0.695073	VLDSLVDKY	0.00963404	13.2422	HLA-A*01:01	-0.20273	-2.01619	-1.81346	0.0153652	0.546832	0.875122	Yes
TDNLELKKLVY	0.140812	TLELKKLVY	0.0213702	13.2422	HLA-A*01:01	-0.20273	-1.67019	-1.46746	0.034083	0.546832	0.875122	Yes
IADMGHLKY	0.985151	IADMGHLKY	0.00177021	13.2422	HLA-A*01:01	-0.20273	-2.75197	-2.54925	0.00282329	0.546832	0.875122	Yes
LSDLLDWKY	0.983472	LSDLLDWKY	0.00198298	13.2422	HLA-A*01:01	-0.20273	-2.70268	-2.49995	0.00316262	0.546832	0.875122	Yes
YSVYRTVIEYY	0.212166	YSVYRTEYY	0.0174979	13.2422	HLA-A*01:01	-0.20273	-1.75701	-1.55429	0.0279071	0.546832	0.875122	Yes
ASEAEMRLFY	0.915167	ASEAEMLFY	0.00594894	13.2422	HLA-A*01:01	-0.20273	-2.22556	-2.02283	0.00948787	0.546832	0.875122	Yes
ITDLPDHLLSY	0.992927	ITDDHLLSY	0.000723404	13.2422	HLA-A*01:01	-0.20273	-3.14062	-2.93789	0.00115375	0.546832	0.875122	Yes
SSDVIRLIMQY	0.879981	SSDVIRLQY	0.00702979	13.2422	HLA-A*01:01	-0.20273	-2.15306	-1.95033	0.0112117	0.546832	0.875122	Yes
VTESPAKFALY	0.942968	VTESPAALY	0.00493617	13.2422	HLA-A*01:01	-0.20273	-2.30661	-2.10388	0.00787263	0.546832	0.875122	Yes
VLDPYLLKY	0.991762	VLDPYLLKY	0.000902128	13.2422	HLA-A*01:01	-0.20273	-3.04473	-2.842	0.00143879	0.546832	0.875122	Yes
HTDDPLTWDY	0.990903	HTDDPTWDY	0.00102128	13.2422	HLA-A*01:01	-0.20273	-2.99086	-2.78813	0.00162882	0.546832	0.875122	Yes
LVDNSIRELQY	0.946921	LVDNSELQY	0.00475745	13.2422	HLA-A*01:01	-0.20273	-2.32263	-2.1199	0.00758758	0.546832	0.875122	Yes
VTDSGRTVILY	0.98965	VTDSGVILY	0.00124255	13.2422	HLA-A*01:01	-0.20273	-2.90569	-2.70296	0.00198173	0.546832	0.875122	Yes
YSEDRIGLADY	0.926843	YSEDRIGLY	0.00555745	13.2422	HLA-A*01:01	-0.20273	-2.25512	-2.0524	0.00886349	0.546832	0.875122	Yes
YADNQVMHFY	0.981602	YADNQVHFY	0.00224681	13.2422	HLA-A*01:01	-0.20273	-2.64843	-2.4457	0.0035834	0.546832	0.875122	Yes
STDVSDLLHQY	0.994175	STDDLLHQY	0.000561702	13.2422	HLA-A*01:01	-0.20273	-3.25049	-3.04776	0.000895851	0.546832	0.875122	Yes
LTHSLVLHY	0.791626	LTHSLVLHY	0.00868085	13.2422	HLA-A*01:01	-0.20273	-2.06144	-1.85871	0.013845	0.546832	0.875122	Yes
VVDPFSKKDWY	0.743383	VVDPFSKKY	0.0091234	13.2422	HLA-A*01:01	-0.20273	-2.03984	-1.83711	0.0145508	0.546832	0.875122	Yes
ATDFKFAMY	0.991136	ATDFKFAMY	0.000995745	13.2422	HLA-A*01:01	-0.20273	-3.00185	-2.79912	0.0015881	0.546832	0.875122	Yes
LSDIVIEKY	0.991688	LSDIVIEKY	0.000919149	13.2422	HLA-A*01:01	-0.20273	-3.03661	-2.83388	0.00146594	0.546832	0.875122	Yes
SSEQVVDLLRY	0.910095	SSEQDLLRY	0.00615319	13.2422	HLA-A*01:01	-0.20273	-2.2109	-2.00817	0.00981364	0.546832	0.875122	Yes
YTESWRWSAY	0.896204	YTESWRSAY	0.00660426	13.2422	HLA-A*01:01	-0.20273	-2.18018	-1.97745	0.010533	0.546832	0.875122	Yes
TTDDWKDFLY	0.995405	TTDDKDFLY	0.0004	13.2422	HLA-A*01:01	-0.20273	-3.39794	-3.19521	0.000637954	0.546832	0.875122	Yes
YLDDPDLKY	0.994928	YLDDPDLKY	0.000493617	13.2422	HLA-A*01:01	-0.20273	-3.30661	-3.10388	0.000787263	0.546832	0.875122	Yes
VSDELRQWY	0.970046	VSDELRQWY	0.00337872	13.2422	HLA-A*01:01	-0.20273	-2.47125	-2.26852	0.00538868	0.546832	0.875122	Yes
TTEILRSMLY	0.951686	TTELRSMLY	0.0044766	13.2422	HLA-A*01:01	-0.20273	-2.34905	-2.14632	0.00713966	0.546832	0.875122	Yes
VTEEPQRLFY	0.987754	VTEEPQLFY	0.00147234	13.2422	HLA-A*01:01	-0.20273	-2.83199	-2.62926	0.00234821	0.546832	0.875122	Yes
YLDLKSDEWEY	0.889409	YLDSDEWEY	0.00681702	13.2422	HLA-A*01:01	-0.20273	-2.16641	-1.96368	0.0108724	0.546832	0.875122	Yes
LTELPDWSY	0.964728	LTELPDWSY	0.00378723	13.2422	HLA-A*01:01	-0.20273	-2.42168	-2.21895	0.0060402	0.546832	0.875122	Yes
PTDPKVVVY	0.989079	PTDPKVVVY	0.00131064	13.2422	HLA-A*01:01	-0.20273	-2.88252	-2.67979	0.00209032	0.546832	0.875122	Yes
YLDNVIGHSY	0.970186	YLDNVGHSY	0.00335319	13.2422	HLA-A*01:01	-0.20273	-2.47454	-2.27181	0.00534796	0.546832	0.875122	Yes
VLDPYLLKYF	0.309159	VLDPYLLKY	0.0149957	13.2422	HLA-A*01:01	-0.20273	-1.82403	-1.6213	0.0239165	0.546832	0.875122	Yes
LTDGHPLTL	0.717005	LTDGHPLTL	0.00938723	13.2422	HLA-A*01:01	-0.20273	-2.02746	-1.82473	0.0149716	0.546832	0.875122	Yes
RTELPQFVSY	0.909386	RTEPQFVSY	0.00617021	13.2422	HLA-A*01:01	-0.20273	-2.2097	-2.00697	0.00984078	0.546832	0.875122	Yes
LIEPHYQPWSY	0.61298	LIEPHPWSY	0.0105702	13.2422	HLA-A*01:01	-0.20273	-1.97592	-1.77319	0.0168583	0.546832	0.875122	Yes
VTDIHQLSF	0.905497	VTDIHQLSF	0.00628936	13.2422	HLA-A*01:01	-0.20273	-2.20139	-1.99866	0.0100308	0.546832	0.875122	Yes
DTDHYFLRY	0.991809	DTDHYFLRY	0.000893617	13.2422	HLA-A*01:01	-0.20273	-3.04885	-2.84612	0.00142522	0.546832	0.875122	Yes
SSEELLSLKY	0.970365	SSEELSLKY	0.00332766	13.2422	HLA-A*01:01	-0.20273	-2.47786	-2.27513	0.00530724	0.546832	0.875122	Yes
ATEESFFILKY	0.956654	ATEESILKY	0.00428085	13.2422	HLA-A*01:01	-0.20273	-2.36847	-2.16574	0.00682747	0.546832	0.875122	Yes
TSEQLDDILKY	0.947961	TSEDDILKY	0.00469787	13.2422	HLA-A*01:01	-0.20273	-2.3281	-2.12537	0.00749257	0.546832	0.875122	Yes
RVDPAKGLFY	0.971164	RVDPAGLFY	0.0032766	13.2422	HLA-A*01:01	-0.20273	-2.48458	-2.28185	0.00522579	0.546832	0.875122	Yes
YLEQLILKY	0.93203	YLEQLILKY	0.00539574	13.2422	HLA-A*01:01	-0.20273	-2.26795	-2.06522	0.00860559	0.546832	0.875122	Yes
FLDDFESKY	0.983653	FLDDFESKY	0.00196596	13.2422	HLA-A*01:01	-0.20273	-2.70643	-2.5037	0.00313548	0.546832	0.875122	Yes
KSDVHLNFY	0.979713	KSDVHLNFY	0.00246809	13.2422	HLA-A*01:01	-0.20273	-2.60764	-2.40491	0.00393631	0.546832	0.875122	Yes
YTEPNYWIRY	0.986937	YTEPNYIRY	0.00156596	13.2422	HLA-A*01:01	-0.20273	-2.80522	-2.60249	0.00249752	0.546832	0.875122	Yes
FTEHEIQEWY	0.963236	FTEHEIQEY	0.00388085	13.2422	HLA-A*01:01	-0.20273	-2.41107	-2.20834	0.00618951	0.546832	0.875122	Yes
ISESIKELQFY	0.864159	ISESELQFY	0.0075234	13.2422	HLA-A*01:01	-0.20273	-2.12359	-1.92086	0.011999	0.546832	0.875122	Yes
TSDTQWGWFY	0.978668	TSDTQGWFY	0.00260426	13.2422	HLA-A*01:01	-0.20273	-2.58432	-2.38159	0.00415349	0.546832	0.875122	Yes
LLDKPVFSFY	0.902855	LLDPVFSFY	0.00642553	13.2422	HLA-A*01:01	-0.20273	-2.19209	-1.98936	0.010248	0.546832	0.875122	Yes
LTDEQIRFLY	0.990264	LTDEQIFLY	0.00111489	13.2422	HLA-A*01:01	-0.20273	-2.95277	-2.75004	0.00177813	0.546832	0.875122	Yes
KTEDPDLPAFY	0.957125	KTEDPDLFY	0.0042383	13.2422	HLA-A*01:01	-0.20273	-2.37281	-2.17008	0.0067596	0.546832	0.875122	Yes
FSEDRPFAVGY	0.907038	FSEDRPFAY	0.00621277	13.2422	HLA-A*01:01	-0.20273	-2.20672	-2.00399	0.00990865	0.546832	0.875122	Yes
VTELHVISY	0.979093	VTELHVISY	0.00255319	13.2422	HLA-A*01:01	-0.20273	-2.59292	-2.39019	0.00407205	0.546832	0.875122	Yes
STDDPMQFHY	0.996961	STDDPQFHY	0.000221277	13.2422	HLA-A*01:01	-0.20273	-3.65506	-3.45234	0.000352911	0.546832	0.875122	Yes
YTELTTAIRTY	0.913397	YTELTTATY	0.00603404	13.2422	HLA-A*01:01	-0.20273	-2.21939	-2.01666	0.00962361	0.546832	0.875122	Yes
TTDLSFLDKY	0.987274	TTDLSFLKY	0.00153191	13.2422	HLA-A*01:01	-0.20273	-2.81477	-2.61204	0.00244323	0.546832	0.875122	Yes
YAALHGEFY	0.80428	YAALHGEFY	0.00843404	13.2422	HLA-A*01:01	-0.20273	-2.07396	-1.87123	0.0134513	0.546832	0.875122	Yes
LSDILRFIY	0.935992	LSDILRFIY	0.00519149	13.2422	HLA-A*01:01	-0.20273	-2.28471	-2.08198	0.00827983	0.546832	0.875122	Yes
ITDPDPDIRY	0.993455	ITDPDPIRY	0.000655319	13.2422	HLA-A*01:01	-0.20273	-3.18355	-2.98082	0.00104516	0.546832	0.875122	Yes
ITDSAGHILY	0.99565	ITDSGHILY	0.000348936	13.2422	HLA-A*01:01	-0.20273	-3.45725	-3.25452	0.000556513	0.546832	0.875122	Yes
LTDYFLKDEY	0.94877	LTDYLKDEY	0.00466383	13.2422	HLA-A*01:01	-0.20273	-2.33126	-2.12853	0.00743827	0.546832	0.875122	Yes
RLEIEPEWAY	0.464874	RLEEPEWAY	0.0122298	13.2422	HLA-A*01:01	-0.20273	-1.91258	-1.70985	0.0195051	0.546832	0.875122	Yes
LTDDGNKWLY	0.995077	LTDDGNWLY	0.000442553	13.2422	HLA-A*01:01	-0.20273	-3.35403	-3.15131	0.000705822	0.546832	0.875122	Yes
LIDADPYLKY	0.949662	LIDDPYLKY	0.00462979	13.2422	HLA-A*01:01	-0.20273	-2.33444	-2.13171	0.00738398	0.546832	0.875122	Yes
TIDDFRNQVY	0.911534	TIDDFNQVY	0.00609362	13.2422	HLA-A*01:01	-0.20273	-2.21512	-2.0124	0.00971862	0.546832	0.875122	Yes
MVDPLLTKY	0.989257	MVDPLLTKY	0.00130213	13.2422	HLA-A*01:01	-0.20273	-2.88535	-2.68262	0.00207674	0.546832	0.875122	Yes
LTEITKGWLY	0.935209	LTETKGWLY	0.00525106	13.2422	HLA-A*01:01	-0.20273	-2.27975	-2.07702	0.00837485	0.546832	0.875122	Yes
LIDSRPFVEY	0.877462	LIDSRPFEY	0.00709787	13.2422	HLA-A*01:01	-0.20273	-2.14887	-1.94614	0.0113203	0.546832	0.875122	Yes
NTDPWAGYRY	0.993325	NTDPAGYRY	0.000680851	13.2422	HLA-A*01:01	-0.20273	-3.16695	-2.96422	0.00108588	0.546832	0.875122	Yes
LTDIFQHDTY	0.983433	LTDIFQHTY	0.002	13.2422	HLA-A*01:01	-0.20273	-2.69897	-2.49624	0.00318977	0.546832	0.875122	Yes
LTDITKGVQY	0.988545	LTDTKGVQY	0.00137021	13.2422	HLA-A*01:01	-0.20273	-2.86321	-2.66048	0.00218533	0.546832	0.875122	Yes
FLDASGAKLDY	0.866894	FLDASGAKY	0.00742979	13.2422	HLA-A*01:01	-0.20273	-2.12902	-1.92629	0.0118497	0.546832	0.875122	Yes
TTDLELIKY	0.995394	TTDLELIKY	0.000408511	13.2422	HLA-A*01:01	-0.20273	-3.3888	-3.18607	0.000651528	0.546832	0.875122	Yes
GIDSRYFDLY	0.673984	GIDSRFDLY	0.00988936	13.2422	HLA-A*01:01	-0.20273	-2.00483	-1.8021	0.0157724	0.546832	0.875122	Yes
ELDPLTGEWHY	0.890302	ELDPGEWHY	0.00679149	13.2422	HLA-A*01:01	-0.20273	-2.16803	-1.96531	0.0108316	0.546832	0.875122	Yes
ITDVSWRLEY	0.981368	ITDVSRLEY	0.00225532	13.2422	HLA-A*01:01	-0.20273	-2.64679	-2.44406	0.00359698	0.546832	0.875122	Yes
HIDFGGTSVWY	0.740277	HIDFGGTSY	0.00916596	13.2422	HLA-A*01:01	-0.20273	-2.03782	-1.83509	0.0146187	0.546832	0.875122	Yes
ISDPFYGPWY	0.873518	ISDPFGPWY	0.00725957	13.2422	HLA-A*01:01	-0.20273	-2.13909	-1.93636	0.0115782	0.546832	0.875122	Yes
YLDWAYRSGGY	0.513326	YLDWASGGY	0.011634	13.2422	HLA-A*01:01	-0.20273	-1.93427	-1.73154	0.018555	0.546832	0.875122	Yes
YSEIKDFLSY	0.973703	YSEKDFLSY	0.00305532	13.2422	HLA-A*01:01	-0.20273	-2.51494	-2.31221	0.00487288	0.546832	0.875122	Yes
LTELMFEHY	0.950228	LTELMFEHY	0.00458723	13.2422	HLA-A*01:01	-0.20273	-2.33845	-2.13572	0.00731611	0.546832	0.875122	Yes
YTEQLLRGLSY	0.9608	YTEQRGLSY	0.004	13.2422	HLA-A*01:01	-0.20273	-2.39794	-2.19521	0.00637954	0.546832	0.875122	Yes
YTDTGLWGLYM	0.803966	YTDTGLGLY	0.00845957	13.2422	HLA-A*01:01	-0.20273	-2.07265	-1.86992	0.0134921	0.546832	0.875122	Yes
YVDQVLQLVY	0.970408	YVDQVLQLY	0.00331915	13.2422	HLA-A*01:01	-0.20273	-2.47897	-2.27624	0.00529366	0.546832	0.875122	Yes
LTDDHVQFLIY	0.993119	LTDDHVQFY	0.000714894	13.2422	HLA-A*01:01	-0.20273	-3.14576	-2.94303	0.00114017	0.546832	0.875122	Yes
FSEPDFVAKFY	0.933342	FSEPDFVFY	0.00531064	13.2422	HLA-A*01:01	-0.20273	-2.27485	-2.07212	0.00846986	0.546832	0.875122	Yes
NTDLWIVMEY	0.94493	NTDLIVMEY	0.00485106	13.2422	HLA-A*01:01	-0.20273	-2.31416	-2.11143	0.00773689	0.546832	0.875122	Yes
WVDPYEVSY	0.974797	WVDPYEVSY	0.00293617	13.2422	HLA-A*01:01	-0.20273	-2.53222	-2.32949	0.00468286	0.546832	0.875122	Yes
DVDIRKDLY	0.8945	DVDIRKDLY	0.00667234	13.2422	HLA-A*01:01	-0.20273	-2.17572	-1.97299	0.0106416	0.546832	0.875122	Yes
FSDLNLEAHMY	0.96918	FSDLEAHMY	0.00342979	13.2422	HLA-A*01:01	-0.20273	-2.46473	-2.262	0.00547012	0.546832	0.875122	Yes
FLDPITGTFRY	0.967958	FLDPGTFRY	0.00354043	13.2422	HLA-A*01:01	-0.20273	-2.45094	-2.24822	0.00564657	0.546832	0.875122	Yes
FTDEEGYGRYL	0.760477	FTDEEGYRY	0.00893617	13.2422	HLA-A*01:01	-0.20273	-2.04885	-1.84612	0.0142522	0.546832	0.875122	Yes
ATEVDSRWQEY	0.935309	ATEVDSQEY	0.00522553	13.2422	HLA-A*01:01	-0.20273	-2.28187	-2.07914	0.00833412	0.546832	0.875122	Yes
LLDPAQRTLY	0.975486	LLDPAQTLY	0.00285106	13.2422	HLA-A*01:01	-0.20273	-2.54499	-2.34226	0.00454712	0.546832	0.875122	Yes
YTFSSIEREEY	0.639561	YTFSSIEEY	0.0102723	13.2422	HLA-A*01:01	-0.20273	-1.98833	-1.7856	0.0163832	0.546832	0.875122	Yes
VSDPVGVLY	0.997733	VSDPVGVLY	0.000110638	13.2422	HLA-A*01:01	-0.20273	-3.95609	-3.75337	0.000176455	0.546832	0.875122	Yes
LLDTNRYLYF	0.196223	LLDTNRYLY	0.0182468	13.2422	HLA-A*01:01	-0.20273	-1.73881	-1.53608	0.0291016	0.546832	0.875122	Yes
LVDLAPLGY	0.966787	LVDLAPLGY	0.0036	13.2422	HLA-A*01:01	-0.20273	-2.4437	-2.24097	0.00574159	0.546832	0.875122	Yes
LTDLVDDNYFY	0.976412	LTDDDNYFY	0.00277447	13.2422	HLA-A*01:01	-0.20273	-2.55682	-2.35409	0.00442496	0.546832	0.875122	Yes
LSDIASLKALY	0.958467	LSDIASLLY	0.00415319	13.2422	HLA-A*01:01	-0.20273	-2.38162	-2.17889	0.00662386	0.546832	0.875122	Yes
LTELPPLDDY	0.925199	LTEPPLDDY	0.00566809	13.2422	HLA-A*01:01	-0.20273	-2.24656	-2.04383	0.00903995	0.546832	0.875122	Yes
HTDWLLDLY	0.990613	HTDWLLDLY	0.00105532	13.2422	HLA-A*01:01	-0.20273	-2.97662	-2.77389	0.00168311	0.546832	0.875122	Yes
YLDPSLNSLVY	0.977702	YLDPSSLVY	0.00262979	13.2422	HLA-A*01:01	-0.20273	-2.58008	-2.37735	0.00419421	0.546832	0.875122	Yes
RADPEAGLLLY	0.958876	RADPEALLY	0.00413617	13.2422	HLA-A*01:01	-0.20273	-2.3834	-2.18067	0.00659672	0.546832	0.875122	Yes
LEDGRTLSDY	0.290303	LEDGRTLSY	0.0154638	13.2422	HLA-A*01:01	-0.20273	-1.81068	-1.60795	0.024663	0.546832	0.875122	Yes
ITDIQIPLDY	0.977144	ITDIQPLDY	0.00268085	13.2422	HLA-A*01:01	-0.20273	-2.57173	-2.369	0.00427565	0.546832	0.875122	Yes
KTELERAFGYY	0.59361	KTELEFGYY	0.0108255	13.2422	HLA-A*01:01	-0.20273	-1.96555	-1.76282	0.0172655	0.546832	0.875122	Yes
WIDPFEVSY	0.944516	WIDPFEVSY	0.0048766	13.2422	HLA-A*01:01	-0.20273	-2.31188	-2.10915	0.00777761	0.546832	0.875122	Yes
NSDYLALLQAY	0.903511	NSDYLALLY	0.00634894	13.2422	HLA-A*01:01	-0.20273	-2.1973	-1.99457	0.0101258	0.546832	0.875122	Yes
STDKFKTDFY	0.990404	STDKKTDFY	0.00108085	13.2422	HLA-A*01:01	-0.20273	-2.96623	-2.7635	0.00172383	0.546832	0.875122	Yes
TVAWFPLYY	0.5868	TVAWFPLYY	0.0109021	13.2422	HLA-A*01:01	-0.20273	-1.96249	-1.75976	0.0173876	0.546832	0.875122	Yes
DTDIVDEAIYY	0.950891	DTDDEAIYY	0.00455319	13.2422	HLA-A*01:01	-0.20273	-2.34168	-2.13895	0.00726182	0.546832	0.875122	Yes
FLEIVSEKSRY	0.55448	FLESEKSRY	0.0111489	13.2422	HLA-A*01:01	-0.20273	-1.95277	-1.75004	0.0177813	0.546832	0.875122	Yes
GTDELRLLY	0.996766	GTDELRLLY	0.00026383	13.2422	HLA-A*01:01	-0.20273	-3.57868	-3.37595	0.000420778	0.546832	0.875122	Yes
FSEPFHLIVSY	0.898279	FSEPFHLSY	0.0065617	13.2422	HLA-A*01:01	-0.20273	-2.18298	-1.98025	0.0104652	0.546832	0.875122	Yes
PTDVLKIVY	0.938705	PTDVLKIVY	0.0051234	13.2422	HLA-A*01:01	-0.20273	-2.29044	-2.08771	0.00817124	0.546832	0.875122	Yes
VTEFEDIKSGY	0.851701	VTEFEDIKY	0.00774468	13.2422	HLA-A*01:01	-0.20273	-2.111	-1.90827	0.0123519	0.546832	0.875122	Yes
LVERLQALY	0.86638	LVERLQALY	0.0074383	13.2422	HLA-A*01:01	-0.20273	-2.12853	-1.9258	0.0118632	0.546832	0.875122	Yes
LTEVDNYHFY	0.976574	LTEDNYHFY	0.00275745	13.2422	HLA-A*01:01	-0.20273	-2.55949	-2.35676	0.00439781	0.546832	0.875122	Yes
LTDLEIKFQY	0.979913	LTDEIKFQY	0.00242553	13.2422	HLA-A*01:01	-0.20273	-2.61519	-2.41246	0.00386845	0.546832	0.875122	Yes
ESAFRKLDELY	0.490542	ESAKLDELY	0.0118894	13.2422	HLA-A*01:01	-0.20273	-1.92484	-1.72211	0.0189622	0.546832	0.875122	Yes
KTDHFIFTY	0.991695	KTDHFIFTY	0.000910638	13.2422	HLA-A*01:01	-0.20273	-3.04065	-2.83792	0.00145236	0.546832	0.875122	Yes
ATEDPWKTNY	0.963347	ATDPWKTNY	0.00387234	13.2422	HLA-A*01:01	-0.20273	-2.41203	-2.2093	0.00617594	0.546832	0.875122	Yes
RSDSYVELSQY	0.904394	RSDSELSQY	0.00634043	13.2422	HLA-A*01:01	-0.20273	-2.19788	-1.99515	0.0101123	0.546832	0.875122	Yes
ETERFRELLLY	0.898679	ETERELLLY	0.00655319	13.2422	HLA-A*01:01	-0.20273	-2.18355	-1.98082	0.0104516	0.546832	0.875122	Yes
ATDIQVLALTY	0.966599	ATDIQALTY	0.00361702	13.2422	HLA-A*01:01	-0.20273	-2.44165	-2.23892	0.00576873	0.546832	0.875122	Yes
LQERNPENWAY	0.164208	LQEPENWAY	0.0199149	13.2422	HLA-A*01:01	-0.20273	-1.70082	-1.49809	0.031762	0.546832	0.875122	Yes
MIEIAGVKLLY	0.457631	MIEGVKLLY	0.0123745	13.2422	HLA-A*01:01	-0.20273	-1.90747	-1.70474	0.0197359	0.546832	0.875122	Yes
ISEQTGKELLY	0.938018	ISEQTGLLY	0.00514894	13.2422	HLA-A*01:01	-0.20273	-2.28828	-2.08555	0.00821196	0.546832	0.875122	Yes
LSEINKPNFY	0.892816	LSENKPNFY	0.00675745	13.2422	HLA-A*01:01	-0.20273	-2.17022	-1.96749	0.0107774	0.546832	0.875122	Yes
STDPSVLGKY	0.997289	STDPSVLKY	0.00013617	13.2422	HLA-A*01:01	-0.20273	-3.86592	-3.66319	0.000217176	0.546832	0.875122	Yes
VTDLLKELV	0.232333	VTDLLKELV	0.0169702	13.2422	HLA-A*01:01	-0.20273	-1.77031	-1.56758	0.0270655	0.546832	0.875122	Yes
DTDFYILDKY	0.916855	DTDFYILKY	0.00588936	13.2422	HLA-A*01:01	-0.20273	-2.22993	-2.0272	0.00939286	0.546832	0.875122	Yes
YIDQGRNPQLY	0.973583	YIDQGPQLY	0.00308085	13.2422	HLA-A*01:01	-0.20273	-2.51133	-2.3086	0.0049136	0.546832	0.875122	Yes
LSDLGKLSY	0.993962	LSDLGKLSY	0.000587234	13.2422	HLA-A*01:01	-0.20273	-3.23119	-3.02846	0.000936571	0.546832	0.875122	Yes
LIDQDARDLY	0.90689	LIDDARDLY	0.00622979	13.2422	HLA-A*01:01	-0.20273	-2.20553	-2.0028	0.0099358	0.546832	0.875122	Yes
TLDLPHFDEY	0.951996	TLDPHFDEY	0.00445957	13.2422	HLA-A*01:01	-0.20273	-2.35071	-2.14798	0.00711251	0.546832	0.875122	Yes
ETDEKDFYLYY	0.988363	ETDEKDLYY	0.00139574	13.2422	HLA-A*01:01	-0.20273	-2.85519	-2.65246	0.00222605	0.546832	0.875122	Yes
TTEESLRNYY	0.971864	TTEESLNYY	0.0032	13.2422	HLA-A*01:01	-0.20273	-2.49485	-2.29212	0.00510363	0.546832	0.875122	Yes
ETEEGIYWRY	0.928888	ETEEGIYRY	0.00549787	13.2422	HLA-A*01:01	-0.20273	-2.25981	-2.05708	0.00876848	0.546832	0.875122	Yes
YLEREDFFFY	0.775434	YLEEDFFFY	0.0088	13.2422	HLA-A*01:01	-0.20273	-2.05552	-1.85279	0.014035	0.546832	0.875122	Yes
LLDTAQRALY	0.915688	LLDTAQALY	0.00593191	13.2422	HLA-A*01:01	-0.20273	-2.22681	-2.02408	0.00946072	0.546832	0.875122	Yes
MIEIAGVKLLY	0.457631	MIEGVKLLY	0.012366	13.2422	HLA-A*01:01	-0.20273	-1.90777	-1.70504	0.0197223	0.546832	0.875122	Yes
DTEFPNFKY	0.954063	DTEFPNFKY	0.00438298	13.2422	HLA-A*01:01	-0.20273	-2.35823	-2.1555	0.00699035	0.546832	0.875122	Yes
MTDLYPPELF	0.620408	MTDYPPELF	0.0105021	13.2422	HLA-A*01:01	-0.20273	-1.97872	-1.77599	0.0167497	0.546832	0.875122	Yes
LLDLDEELRY	0.936373	LLDDEELRY	0.00517447	13.2422	HLA-A*01:01	-0.20273	-2.28613	-2.0834	0.00825268	0.546832	0.875122	Yes
HLDDQMTLLQY	0.968238	HLDDQLLQY	0.00353191	13.2422	HLA-A*01:01	-0.20273	-2.45199	-2.24926	0.005633	0.546832	0.875122	Yes
ATDLDVANFY	0.990701	ATDDVANFY	0.00104681	13.2422	HLA-A*01:01	-0.20273	-2.98013	-2.7774	0.00166954	0.546832	0.875122	Yes
NTDLWIVMEY	0.94493	NTDLIVMEY	0.00485957	13.2422	HLA-A*01:01	-0.20273	-2.3134	-2.11067	0.00775046	0.546832	0.875122	Yes
MIEPRTLQY	0.97027	MIEPRTLQY	0.00333617	13.2422	HLA-A*01:01	-0.20273	-2.47675	-2.27402	0.00532081	0.546832	0.875122	Yes
TVDPASLWEY	0.989941	TVDPASLEY	0.00116596	13.2422	HLA-A*01:01	-0.20273	-2.93332	-2.73059	0.00185957	0.546832	0.875122	Yes
LLEDFLEHEGY	0.45111	LLEDEHEGY	0.0124596	13.2422	HLA-A*01:01	-0.20273	-1.9045	-1.70177	0.0198716	0.546832	0.875122	Yes
FSEFTGVWKY	0.949831	FSETGVWKY	0.00461277	13.2422	HLA-A*01:01	-0.20273	-2.33604	-2.13331	0.00735683	0.546832	0.875122	Yes
LAEWKSLEY	0.876139	LAEWKSLEY	0.00715745	13.2422	HLA-A*01:01	-0.20273	-2.14524	-1.94251	0.0114153	0.546832	0.875122	Yes
KTETEPVFWYY	0.881145	KTETEPWYY	0.00699574	13.2422	HLA-A*01:01	-0.20273	-2.15517	-1.95244	0.0111574	0.546832	0.875122	Yes
YTEFVPQIPGY	0.931926	YTEFVPQIY	0.00540426	13.2422	HLA-A*01:01	-0.20273	-2.26726	-2.06453	0.00861917	0.546832	0.875122	Yes
FMDPEMETRY	0.960236	FMDPEMTRY	0.00405106	13.2422	HLA-A*01:01	-0.20273	-2.39243	-2.1897	0.00646098	0.546832	0.875122	Yes
TVDNVQPLLY	0.98871	TVDNQPLLY	0.00133617	13.2422	HLA-A*01:01	-0.20273	-2.87414	-2.67141	0.00213104	0.546832	0.875122	Yes
PTDYADIMMGY	0.828276	PTDDIMMGY	0.00804255	13.2422	HLA-A*01:01	-0.20273	-2.09461	-1.89188	0.012827	0.546832	0.875122	Yes
LTDFDIRFY	0.986068	LTDFDIRFY	0.00166809	13.2422	HLA-A*01:01	-0.20273	-2.77778	-2.57505	0.0026604	0.546832	0.875122	Yes
STEEARFLTY	0.976001	STEEAFLTY	0.00280851	13.2422	HLA-A*01:01	-0.20273	-2.55152	-2.34879	0.00447925	0.546832	0.875122	Yes
VTDPRVVDLLV	0.2405	VTDPVDLLV	0.0167915	13.2422	HLA-A*01:01	-0.20273	-1.77491	-1.57218	0.0267805	0.546832	0.875122	Yes
FTDVNSILRY	0.997025	FTDNSILRY	0.000195745	13.2422	HLA-A*01:01	-0.20273	-3.70831	-3.50558	0.00031219	0.546832	0.875122	Yes
HSDELTSLLGY	0.987171	HSDELTSLY	0.00154894	13.2422	HLA-A*01:01	-0.20273	-2.80997	-2.60724	0.00247038	0.546832	0.875122	Yes
HLDLGILYY	0.980093	HLDLGILYY	0.00239149	13.2422	HLA-A*01:01	-0.20273	-2.62133	-2.4186	0.00381415	0.546832	0.875122	Yes
MTELYDYPKY	0.835433	MTELYDYKY	0.00795745	13.2422	HLA-A*01:01	-0.20273	-2.09923	-1.8965	0.0126912	0.546832	0.875122	Yes
ELDPAVMDQFY	0.940051	ELDPADQFY	0.00507234	13.2422	HLA-A*01:01	-0.20273	-2.29479	-2.09206	0.0080898	0.546832	0.875122	Yes
LLDPASFEY	0.991585	LLDPASFEY	0.00092766	13.2422	HLA-A*01:01	-0.20273	-3.03261	-2.82988	0.00147951	0.546832	0.875122	Yes
FSDPNFLAH	0.825676	FSDPNFLAH	0.00810213	13.2422	HLA-A*01:01	-0.20273	-2.0914	-1.88867	0.012922	0.546832	0.875122	Yes
YADPYRQLQY	0.990963	YADPYQLQY	0.00100426	13.2422	HLA-A*01:01	-0.20273	-2.99816	-2.79543	0.00160167	0.546832	0.875122	Yes
FVAEPDNKNVY	0.316384	FVAEPDNKY	0.0147915	13.2422	HLA-A*01:01	-0.20273	-1.82999	-1.62726	0.0235907	0.546832	0.875122	Yes
FVEENLQHWSY	0.730267	FVEENLQHY	0.00928511	13.2422	HLA-A*01:01	-0.20273	-2.03221	-1.82948	0.0148087	0.546832	0.875122	Yes
YTGVQILLY	0.95092	YTGVQILLY	0.00454468	13.2422	HLA-A*01:01	-0.20273	-2.3425	-2.13977	0.00724825	0.546832	0.875122	Yes
YSDFPFHEDY	0.988757	YSDFPFHEY	0.00132766	13.2422	HLA-A*01:01	-0.20273	-2.87691	-2.67418	0.00211746	0.546832	0.875122	Yes
NLDPLTETY	0.982602	NLDPLTETY	0.00212766	13.2422	HLA-A*01:01	-0.20273	-2.6721	-2.46937	0.00339337	0.546832	0.875122	Yes
YTAVVPLVY	0.962126	YTAVVPLVY	0.00393191	13.2422	HLA-A*01:01	-0.20273	-2.4054	-2.20267	0.00627095	0.546832	0.875122	Yes
STESMDFLKY	0.979315	STESDFLKY	0.00251064	13.2422	HLA-A*01:01	-0.20273	-2.60022	-2.39749	0.00400418	0.546832	0.875122	Yes
LLEDKHFQSY	0.814797	LLDKHFQSY	0.00831489	13.2422	HLA-A*01:01	-0.20273	-2.08014	-1.87741	0.0132613	0.546832	0.875122	Yes
YSAAWAEYY	0.925852	YSAAWAEYY	0.00563404	13.2422	HLA-A*01:01	-0.20273	-2.24918	-2.04645	0.00898565	0.546832	0.875122	Yes
LTDTFTAYYR	0.625637	LTDTFTAYY	0.0104596	13.2422	HLA-A*01:01	-0.20273	-1.98049	-1.77776	0.0166818	0.546832	0.875122	Yes
LLDQGQLNKY	0.95804	LLDQGQLKY	0.00417872	13.2422	HLA-A*01:01	-0.20273	-2.37896	-2.17623	0.00666459	0.546832	0.875122	Yes
VTDDLVCLVY	0.987965	VTDDLVLVY	0.00142128	13.2422	HLA-A*01:01	-0.20273	-2.84732	-2.64459	0.00226677	0.546832	0.875122	Yes
YIDPIAMEYY	0.976612	YIDPIAMEY	0.00274043	13.2422	HLA-A*01:01	-0.20273	-2.56218	-2.35945	0.00437066	0.546832	0.875122	Yes
DTEPPPLLVY	0.981985	DTEPPPLLY	0.00218723	13.2422	HLA-A*01:01	-0.20273	-2.6601	-2.45738	0.00348839	0.546832	0.875122	Yes
LVDLYILTY	0.948164	LVDLYILTY	0.00467234	13.2422	HLA-A*01:01	-0.20273	-2.33047	-2.12774	0.00745185	0.546832	0.875122	Yes
YLDPVQRDLY	0.985385	YLDPVQDLY	0.00174468	13.2422	HLA-A*01:01	-0.20273	-2.75828	-2.55555	0.00278257	0.546832	0.875122	Yes
LLEKEILFY	0.913958	LLEKEILFY	0.00599149	13.2422	HLA-A*01:01	-0.20273	-2.22247	-2.01974	0.00955574	0.546832	0.875122	Yes
FLDPAQRDLY	0.980603	FLDPAQDLY	0.0023234	13.2422	HLA-A*01:01	-0.20273	-2.63388	-2.43115	0.00370556	0.546832	0.875122	Yes
FADQLIAAGHY	0.672139	FADQAAGHY	0.00991489	13.2422	HLA-A*01:01	-0.20273	-2.00371	-1.80098	0.0158131	0.546832	0.875122	Yes
ALDSHILDYY	0.942	ALDSHILYY	0.00497021	13.2422	HLA-A*01:01	-0.20273	-2.30363	-2.1009	0.00792692	0.546832	0.875122	Yes
LTLGRVEDFY	0.387575	LTLGVEDFY	0.0134383	13.2422	HLA-A*01:01	-0.20273	-1.87166	-1.66893	0.0214325	0.546832	0.875122	Yes
ATDFKFAMY	0.991136	ATDFKFAMY	0.000987234	13.2422	HLA-A*01:01	-0.20273	-3.00558	-2.80285	0.00157453	0.546832	0.875122	Yes
ALDTINILLY	0.936213	ALDTINLLY	0.00518298	13.2422	HLA-A*01:01	-0.20273	-2.28542	-2.08269	0.00826626	0.546832	0.875122	Yes
FIDHDITSQLY	0.955389	FIDHTSQLY	0.00433191	13.2422	HLA-A*01:01	-0.20273	-2.36332	-2.16059	0.00690891	0.546832	0.875122	Yes
MTELYDYPKY	0.835433	MTELYDYKY	0.00794894	13.2422	HLA-A*01:01	-0.20273	-2.09969	-1.89696	0.0126776	0.546832	0.875122	Yes
MVDPLLTKY	0.989257	MVDPLLTKY	0.00129362	13.2422	HLA-A*01:01	-0.20273	-2.88819	-2.68546	0.00206317	0.546832	0.875122	Yes
TIDKATGILLY	0.932417	TIDKATLLY	0.00534468	13.2422	HLA-A*01:01	-0.20273	-2.27208	-2.06935	0.00852415	0.546832	0.875122	Yes
RLDTPLYFSY	0.794166	RLDTPLYFY	0.0086383	13.2422	HLA-A*01:01	-0.20273	-2.06357	-1.86084	0.0137771	0.546832	0.875122	Yes
SDIVSTMEHY	0.115512	SDISTMEHY	0.0231574	13.2422	HLA-A*01:01	-0.20273	-1.63531	-1.43258	0.0369335	0.546832	0.875122	Yes
FMDPEMETRY	0.960236	FMDPEMTRY	0.00406809	13.2422	HLA-A*01:01	-0.20273	-2.39061	-2.18788	0.00648813	0.546832	0.875122	Yes
DSDHLTIYNAY	0.900363	DSDHLTIYY	0.00652766	13.2422	HLA-A*01:01	-0.20273	-2.18524	-1.98251	0.0104109	0.546832	0.875122	Yes
ATESILHFAGY	0.86037	ATESILHFY	0.00759149	13.2422	HLA-A*01:01	-0.20273	-2.11967	-1.91694	0.0121076	0.546832	0.875122	Yes
ILDIPNQLY	0.983303	ILDIPNQLY	0.00202553	13.2422	HLA-A*01:01	-0.20273	-2.69346	-2.49073	0.00323049	0.546832	0.875122	Yes
LLDPSQKNLY	0.976664	LLDPSQNLY	0.00273191	13.2422	HLA-A*01:01	-0.20273	-2.56353	-2.3608	0.00435709	0.546832	0.875122	Yes
LTEIKGSVY	0.956204	LTEIKGSVY	0.00429787	13.2422	HLA-A*01:01	-0.20273	-2.36675	-2.16402	0.00685461	0.546832	0.875122	Yes
LLDTPAQLWY	0.957854	LLDTPAQLY	0.00421277	13.2422	HLA-A*01:01	-0.20273	-2.37543	-2.1727	0.00671888	0.546832	0.875122	Yes
LTDPIQGTEY	0.996881	LTDPIQTEY	0.000238298	13.2422	HLA-A*01:01	-0.20273	-3.62288	-3.42015	0.000380058	0.546832	0.875122	Yes
ATDIKITVY	0.990739	ATDIKITVY	0.00102979	13.2422	HLA-A*01:01	-0.20273	-2.98725	-2.78452	0.00164239	0.546832	0.875122	Yes
KTDMVEKALLY	0.981053	KTDEKALLY	0.00228936	13.2422	HLA-A*01:01	-0.20273	-2.64029	-2.43756	0.00365127	0.546832	0.875122	Yes
VLDINSIDNLY	0.876511	VLDSIDNLY	0.00714043	13.2422	HLA-A*01:01	-0.20273	-2.14628	-1.94355	0.0113882	0.546832	0.875122	Yes
LADLSCLVY	0.870505	LADLSCLVY	0.00731064	13.2422	HLA-A*01:01	-0.20273	-2.13604	-1.93332	0.0116596	0.546832	0.875122	Yes
YSQDYQQFY	0.987709	YSQDYQQFY	0.00148936	13.2422	HLA-A*01:01	-0.20273	-2.827	-2.62427	0.00237536	0.546832	0.875122	Yes
VTEGLTDVILY	0.946894	VTEGLTDLY	0.00476596	13.2422	HLA-A*01:01	-0.20273	-2.32185	-2.11912	0.00760116	0.546832	0.875122	Yes
YADQLKEYLFY	0.922383	YADQEYLFY	0.00573617	13.2422	HLA-A*01:01	-0.20273	-2.24138	-2.03865	0.00914853	0.546832	0.875122	Yes
LTEYFLNDKY	0.865481	LTEYLNDKY	0.00746383	13.2422	HLA-A*01:01	-0.20273	-2.12704	-1.92431	0.011904	0.546832	0.875122	Yes
ATQLAADLLKY	0.662241	ATAADLLKY	0.010034	13.2422	HLA-A*01:01	-0.20273	-1.99852	-1.79579	0.0160031	0.546832	0.875122	Yes
SELVGQLY	0.520912	-SELVGQLY	0.0115574	13.2422	HLA-A*01:01	-0.20273	-1.93714	-1.73441	0.0184328	0.546832	0.875122	Yes
LSDIASALRYL	0.328261	LSDASALRY	0.0145362	13.2422	HLA-A*01:01	-0.20273	-1.83755	-1.63482	0.0231835	0.546832	0.875122	Yes
YMELYTHVY	0.876097	YMELYTHVY	0.00717447	13.2422	HLA-A*01:01	-0.20273	-2.14421	-1.94148	0.0114425	0.546832	0.875122	Yes
MTDPIRILV	0.668693	MTDPIRILV	0.00999149	13.2422	HLA-A*01:01	-0.20273	-2.00037	-1.79764	0.0159353	0.546832	0.875122	Yes
YTDTGLWGL	0.448089	YTDTGLWGL	0.0124936	13.2422	HLA-A*01:01	-0.20273	-1.90331	-1.70058	0.0199259	0.546832	0.875122	Yes
FSDYPPLGRF	0.604842	FSDYPPLRF	0.0106383	13.2422	HLA-A*01:01	-0.20273	-1.97313	-1.7704	0.0169669	0.546832	0.875122	Yes
ETDLLDIRSEY	0.961441	ETDDIRSEY	0.00396596	13.2422	HLA-A*01:01	-0.20273	-2.40165	-2.19892	0.00632525	0.546832	0.875122	Yes
LADLKVQLY	0.984248	LADLKVQLY	0.00188936	13.2422	HLA-A*01:01	-0.20273	-2.72368	-2.52096	0.00301332	0.546832	0.875122	Yes
AVDVNNMLHLY	0.901757	AVDVNNHLY	0.00649362	13.2422	HLA-A*01:01	-0.20273	-2.18751	-1.98478	0.0103566	0.546832	0.875122	Yes
LVDPSVYGY	0.980946	LVDPSVYGY	0.00230638	13.2422	HLA-A*01:01	-0.20273	-2.63707	-2.43434	0.00367842	0.546832	0.875122	Yes
LLDPAQKILY	0.972391	LLDPAQILY	0.00317447	13.2422	HLA-A*01:01	-0.20273	-2.49833	-2.2956	0.00506291	0.546832	0.875122	Yes
LSDIGSGIRYL	0.350606	LSDGSGIRY	0.0140596	13.2422	HLA-A*01:01	-0.20273	-1.85203	-1.6493	0.0224234	0.546832	0.875122	Yes
FSEIDLEKY	0.97245	FSEIDLEKY	0.00316596	13.2422	HLA-A*01:01	-0.20273	-2.49949	-2.29677	0.00504934	0.546832	0.875122	Yes
YLDKEDTFFY	0.97645	YLDEDTFFY	0.00276596	13.2422	HLA-A*01:01	-0.20273	-2.55815	-2.35543	0.00441139	0.546832	0.875122	Yes
VSEQELLRY	0.982019	VSEQELLRY	0.00217872	13.2422	HLA-A*01:01	-0.20273	-2.6618	-2.45907	0.00347481	0.546832	0.875122	Yes
YTEDEIYELSY	0.990591	YTEDEELSY	0.00106383	13.2422	HLA-A*01:01	-0.20273	-2.97313	-2.7704	0.00169669	0.546832	0.875122	Yes
YTDTGLWGLY	0.995294	YTDTGLGLY	0.000425532	13.2422	HLA-A*01:01	-0.20273	-3.37107	-3.16834	0.000678675	0.546832	0.875122	Yes
VVDIQGVGDLY	0.918478	VVDGVGDLY	0.0058383	13.2422	HLA-A*01:01	-0.20273	-2.23371	-2.03098	0.00931142	0.546832	0.875122	Yes
WTDNRELTY	0.997157	WTDNRELTY	0.000161702	13.2422	HLA-A*01:01	-0.20273	-3.79128	-3.58855	0.000257896	0.546832	0.875122	Yes
SSEDLMKELY	0.967144	SSEDLMELY	0.00358298	13.2422	HLA-A*01:01	-0.20273	-2.44576	-2.24303	0.00571444	0.546832	0.875122	Yes
FTEIGIHLNAY	0.919541	FTEIGIHLY	0.00580426	13.2422	HLA-A*01:01	-0.20273	-2.23625	-2.03352	0.00925712	0.546832	0.875122	Yes
FVESSTSVLRY	0.887041	FVESSTLRY	0.00686809	13.2422	HLA-A*01:01	-0.20273	-2.16316	-1.96043	0.0109538	0.546832	0.875122	Yes
NTDSLDWALY	0.984993	NTDSLDALY	0.00179574	13.2422	HLA-A*01:01	-0.20273	-2.74576	-2.54303	0.00286401	0.546832	0.875122	Yes
LVDEWLDSY	0.940598	LVDEWLDSY	0.00502979	13.2422	HLA-A*01:01	-0.20273	-2.29845	-2.09572	0.00802193	0.546832	0.875122	Yes
FTDVPSIQIY	0.995908	FTDPSIQIY	0.000323404	13.2422	HLA-A*01:01	-0.20273	-3.49025	-3.28752	0.000515793	0.546832	0.875122	Yes
YTADGKEVLEY	0.95956	YTADEVLEY	0.00411915	13.2422	HLA-A*01:01	-0.20273	-2.38519	-2.18246	0.00656957	0.546832	0.875122	Yes
LTDYDIRFYMY	0.896411	LTDYDIYMY	0.00659574	13.2422	HLA-A*01:01	-0.20273	-2.18074	-1.97801	0.0105195	0.546832	0.875122	Yes
RTEYTITMY	0.957912	RTEYTITMY	0.00420426	13.2422	HLA-A*01:01	-0.20273	-2.37631	-2.17358	0.00670531	0.546832	0.875122	Yes
NTDFRYFIY	0.974586	NTDFRYFIY	0.0029617	13.2422	HLA-A*01:01	-0.20273	-2.52846	-2.32573	0.00472358	0.546832	0.875122	Yes
TSDDPWLTAY	0.992002	TSDDPWLTY	0.000851064	13.2422	HLA-A*01:01	-0.20273	-3.07004	-2.86731	0.00135735	0.546832	0.875122	Yes
ATDFDVLSY	0.995615	ATDFDVLSY	0.000357447	13.2422	HLA-A*01:01	-0.20273	-3.44679	-3.24406	0.000570087	0.546832	0.875122	Yes
ELDPMAMTQKY	0.903064	ELDPMTQKY	0.00638298	13.2422	HLA-A*01:01	-0.20273	-2.19498	-1.99225	0.0101801	0.546832	0.875122	Yes
VSENVTQYLQY	0.935216	VSENVTQYY	0.00524255	13.2422	HLA-A*01:01	-0.20273	-2.28046	-2.07773	0.00836127	0.546832	0.875122	Yes
CLEPQITPSYY	0.686125	CLEPQPSYY	0.00972766	13.2422	HLA-A*01:01	-0.20273	-2.01199	-1.80926	0.0155145	0.546832	0.875122	Yes
SSDVIRLIMQY	0.879981	SSDVIRLQY	0.0070383	13.2422	HLA-A*01:01	-0.20273	-2.15253	-1.9498	0.0112253	0.546832	0.875122	Yes
ISEVGTIRY	0.981964	ISEVGTIRY	0.00219574	13.2422	HLA-A*01:01	-0.20273	-2.65842	-2.45569	0.00350196	0.546832	0.875122	Yes
MTDEIFHDVAY	0.983003	MTDEHDVAY	0.00210213	13.2422	HLA-A*01:01	-0.20273	-2.67734	-2.47461	0.00335265	0.546832	0.875122	Yes
ILDEVIMGY	0.957072	ILDEVIMGY	0.00424681	13.2422	HLA-A*01:01	-0.20273	-2.37194	-2.16921	0.00677317	0.546832	0.875122	Yes
NTSPLLGDARF	0.020705	NTSPGDARF	0.047983	13.2422	HLA-A*01:01	-0.20273	-1.31891	-1.11618	0.0765274	0.546832	0.875122	Yes
ATEVLMWFY	0.853129	ATEVLMWFY	0.00770213	13.2422	HLA-A*01:01	-0.20273	-2.11339	-1.91066	0.012284	0.546832	0.875122	Yes
KLDRSVFTAY	0.653501	KLDSVFTAY	0.0101106	13.2422	HLA-A*01:01	-0.20273	-1.99522	-1.79249	0.0161253	0.546832	0.875122	Yes
YIDEQFERY	0.989994	YIDEQFERY	0.00115745	13.2422	HLA-A*01:01	-0.20273	-2.9365	-2.73377	0.001846	0.546832	0.875122	Yes
LVDDGWILAY	0.964062	LVDDGILAY	0.00382979	13.2422	HLA-A*01:01	-0.20273	-2.41683	-2.2141	0.00610807	0.546832	0.875122	Yes
FIDASRLVY	0.966259	FIDASRLVY	0.00364255	13.2422	HLA-A*01:01	-0.20273	-2.43859	-2.23586	0.00580946	0.546832	0.875122	Yes
YTELLAQVY	0.986173	YTELLAQVY	0.00165106	13.2422	HLA-A*01:01	-0.20273	-2.78224	-2.57951	0.00263326	0.546832	0.875122	Yes
ISEYAADIFY	0.816429	ISEAADIFY	0.00828085	13.2422	HLA-A*01:01	-0.20273	-2.08193	-1.8792	0.013207	0.546832	0.875122	Yes
YTDIINIFLY	0.987799	YTDIINILY	0.00145532	13.2422	HLA-A*01:01	-0.20273	-2.83704	-2.63431	0.00232107	0.546832	0.875122	Yes
IVDAEWNILY	0.935564	IVDAENILY	0.00521702	13.2422	HLA-A*01:01	-0.20273	-2.28258	-2.07985	0.00832055	0.546832	0.875122	Yes
AIDLLKEIY	0.753926	AIDLLKEIY	0.00905532	13.2422	HLA-A*01:01	-0.20273	-2.0431	-1.84037	0.0144422	0.546832	0.875122	Yes
VSDGIIAPGY	0.877118	VSDGIAPGY	0.0071234	13.2422	HLA-A*01:01	-0.20273	-2.14731	-1.94458	0.011361	0.546832	0.875122	Yes
RIEKQFLLY	0.824704	RIEKQFLLY	0.00811915	13.2422	HLA-A*01:01	-0.20273	-2.09049	-1.88776	0.0129491	0.546832	0.875122	Yes
LSDPMWPQY	0.987595	LSDPMWPQY	0.00149787	13.2422	HLA-A*01:01	-0.20273	-2.82453	-2.6218	0.00238893	0.546832	0.875122	Yes
ISDAAQLPHDY	0.867932	ISDAAQHDY	0.00739574	13.2422	HLA-A*01:01	-0.20273	-2.13102	-1.92829	0.0117954	0.546832	0.875122	Yes
TSEPKPFLYY	0.987758	TSEPKPLYY	0.00146383	13.2422	HLA-A*01:01	-0.20273	-2.83451	-2.63178	0.00233464	0.546832	0.875122	Yes
GVDVTGPHLY	0.940156	GVDTGPHLY	0.00505532	13.2422	HLA-A*01:01	-0.20273	-2.29625	-2.09352	0.00806266	0.546832	0.875122	Yes
HSDTIQWLY	0.996419	HSDTIQWLY	0.000297872	13.2422	HLA-A*01:01	-0.20273	-3.52597	-3.32324	0.000475072	0.546832	0.875122	Yes
HLDDQMTLLQY	0.968238	HLDDQLLQY	0.0035234	13.2422	HLA-A*01:01	-0.20273	-2.45304	-2.25031	0.00561943	0.546832	0.875122	Yes
FIDSIIAKY	0.963903	FIDSIIAKY	0.00384681	13.2422	HLA-A*01:01	-0.20273	-2.4149	-2.21217	0.00613522	0.546832	0.875122	Yes
ITQGTPLKY	0.965109	ITQGTPLKY	0.00370213	13.2422	HLA-A*01:01	-0.20273	-2.43155	-2.22882	0.00590447	0.546832	0.875122	Yes
FMDPEMETRY	0.960236	FMDPEMTRY	0.0040766	13.2422	HLA-A*01:01	-0.20273	-2.3897	-2.18697	0.0065017	0.546832	0.875122	Yes
TTSHLMGMFY	0.668923	TTSHLGMFY	0.00995745	13.2422	HLA-A*01:01	-0.20273	-2.00185	-1.79912	0.015881	0.546832	0.875122	Yes
GVDLTGPQLY	0.933847	GVDTGPQLY	0.00528511	13.2422	HLA-A*01:01	-0.20273	-2.27695	-2.07422	0.00842914	0.546832	0.875122	Yes
NSYWVGEDSTY	0.247224	NSYGEDSTY	0.0166213	13.2422	HLA-A*01:01	-0.20273	-1.77934	-1.57661	0.026509	0.546832	0.875122	Yes
ASDSIVLFY	0.996973	ASDSIVLFY	0.000212766	13.2422	HLA-A*01:01	-0.20273	-3.6721	-3.46937	0.000339337	0.546832	0.875122	Yes
YLEQLHQLY	0.964747	YLEQLHQLY	0.00377872	13.2422	HLA-A*01:01	-0.20273	-2.42265	-2.21993	0.00602663	0.546832	0.875122	Yes
TADHNLLLYE	0.443169	TADHNLLLY	0.0125787	13.2422	HLA-A*01:01	-0.20273	-1.90036	-1.69763	0.0200616	0.546832	0.875122	Yes
RVDPIGPLSY	0.97255	RVDPGPLSY	0.00313191	13.2422	HLA-A*01:01	-0.20273	-2.50419	-2.30146	0.00499505	0.546832	0.875122	Yes
FSDIHAGELYF	0.650129	FSDHAGELY	0.0101362	13.2422	HLA-A*01:01	-0.20273	-1.99413	-1.7914	0.016166	0.546832	0.875122	Yes
VDPNYAYAY	0.079921	VDPNYAYAY	0.0270553	13.2422	HLA-A*01:01	-0.20273	-1.56775	-1.36502	0.0431501	0.546832	0.875122	Yes
SSDYVEIHY	0.991928	SSDYVEIHY	0.000868085	13.2422	HLA-A*01:01	-0.20273	-3.06144	-2.85871	0.0013845	0.546832	0.875122	Yes
NTDFWKTLRY	0.987167	NTDFKTLRY	0.00155745	13.2422	HLA-A*01:01	-0.20273	-2.80759	-2.60486	0.00248395	0.546832	0.875122	Yes
ALDSHILDY	0.963085	ALDSHILDY	0.00389787	13.2422	HLA-A*01:01	-0.20273	-2.40917	-2.20644	0.00621666	0.546832	0.875122	Yes
LLDTNRYLY	0.969007	LLDTNRYLY	0.00347234	13.2422	HLA-A*01:01	-0.20273	-2.45938	-2.25665	0.00553799	0.546832	0.875122	Yes
AVDPTSGQLY	0.986834	AVDPTSQLY	0.00158298	13.2422	HLA-A*01:01	-0.20273	-2.80052	-2.5978	0.00252467	0.546832	0.875122	Yes
LVDDPLEY	0.858883	LVDD-PLEY	0.00760851	13.2422	HLA-A*01:01	-0.20273	-2.1187	-1.91597	0.0121347	0.546832	0.875122	Yes
PTEISQSLLY	0.956886	PTESQSLLY	0.00427234	13.2422	HLA-A*01:01	-0.20273	-2.36933	-2.1666	0.00681389	0.546832	0.875122	Yes
VSERDVYLTY	0.931475	VSEDVYLTY	0.00542128	13.2422	HLA-A*01:01	-0.20273	-2.2659	-2.06317	0.00864632	0.546832	0.875122	Yes
KSDPFLVFY	0.989862	KSDPFLVFY	0.00117447	13.2422	HLA-A*01:01	-0.20273	-2.93016	-2.72743	0.00187314	0.546832	0.875122	Yes
ATEVLMWFY	0.853129	ATEVLMWFY	0.00769362	13.2422	HLA-A*01:01	-0.20273	-2.11387	-1.91114	0.0122704	0.546832	0.875122	Yes
FVDPLVTNY	0.985883	FVDPLVTNY	0.00168511	13.2422	HLA-A*01:01	-0.20273	-2.77337	-2.57064	0.00268755	0.546832	0.875122	Yes
EAEWQTRWFY	0.481006	EAEQTRWFY	0.011966	13.2422	HLA-A*01:01	-0.20273	-1.92205	-1.71932	0.0190843	0.546832	0.875122	Yes
VVDDWIESY	0.975037	VVDDWIESY	0.00291064	13.2422	HLA-A*01:01	-0.20273	-2.53601	-2.33328	0.00464213	0.546832	0.875122	Yes
WVDDQRPENY	0.907685	WVDDQPENY	0.00619574	13.2422	HLA-A*01:01	-0.20273	-2.20791	-2.00518	0.0098815	0.546832	0.875122	Yes
YTDNLVRVW	0.391461	YTDNLVRVW	0.0133957	13.2422	HLA-A*01:01	-0.20273	-1.87303	-1.6703	0.0213647	0.546832	0.875122	Yes
LLEIAQTHYY	0.786261	LLEAQTHYY	0.00874894	13.2422	HLA-A*01:01	-0.20273	-2.05804	-1.85532	0.0139536	0.546832	0.875122	Yes
AIDQLHLEY	0.979637	AIDQLHLEY	0.0024766	13.2422	HLA-A*01:01	-0.20273	-2.60614	-2.40342	0.00394989	0.546832	0.875122	Yes
YSDAFLNDSY	0.98187	YSDAFNDSY	0.00221277	13.2422	HLA-A*01:01	-0.20273	-2.65506	-2.45234	0.00352911	0.546832	0.875122	Yes
VTEGGEPYRLY	0.899962	VTEGGEPLY	0.00653617	13.2422	HLA-A*01:01	-0.20273	-2.18468	-1.98195	0.0104244	0.546832	0.875122	Yes
YTDFDGTRVY	0.995223	YTDFDGTRY	0.000434043	13.2422	HLA-A*01:01	-0.20273	-3.36247	-3.15974	0.000692248	0.546832	0.875122	Yes
LLDEAQRLLY	0.977521	LLDEAQLLY	0.0026383	13.2422	HLA-A*01:01	-0.20273	-2.57868	-2.37595	0.00420778	0.546832	0.875122	Yes
ATDLVVLDRY	0.969102	ATDLVVLRY	0.00345532	13.2422	HLA-A*01:01	-0.20273	-2.46151	-2.25878	0.00551084	0.546832	0.875122	Yes
DIDIRPGLY	0.866209	DIDIRPGLY	0.00744681	13.2422	HLA-A*01:01	-0.20273	-2.12803	-1.9253	0.0118768	0.546832	0.875122	Yes
YVDPQFLTY	0.99844	YVDPQFLTY	3.40426e-05	13.2422	HLA-A*01:01	-0.20273	-4.46798	-4.26525	5.4294e-05	0.546832	0.875122	Yes
FIEESRQLLSY	0.720089	FIEESRQLY	0.00935319	13.2422	HLA-A*01:01	-0.20273	-2.02904	-1.82631	0.0149173	0.546832	0.875122	Yes
VLDRLTFDY	0.879698	VLDRLTFDY	0.00704681	13.2422	HLA-A*01:01	-0.20273	-2.15201	-1.94928	0.0112389	0.546832	0.875122	Yes
FSEACWEVY	0.745424	FSEACWEVY	0.00911489	13.2422	HLA-A*01:01	-0.20273	-2.04025	-1.83752	0.0145372	0.546832	0.875122	Yes
FSQPENQNLLY	0.976374	FSENQNLLY	0.00278298	13.2422	HLA-A*01:01	-0.20273	-2.55549	-2.35276	0.00443853	0.546832	0.875122	Yes
HSEYHTLLY	0.996565	HSEYHTLLY	0.000280851	13.2422	HLA-A*01:01	-0.20273	-3.55152	-3.34879	0.000447925	0.546832	0.875122	Yes
TVDEHVWFY	0.994455	TVDEHVWFY	0.00053617	13.2422	HLA-A*01:01	-0.20273	-3.2707	-3.06797	0.00085513	0.546832	0.875122	Yes
ELDPMAMTQKY	0.903064	ELDPMTQKY	0.00639149	13.2422	HLA-A*01:01	-0.20273	-2.1944	-1.99167	0.0101937	0.546832	0.875122	Yes
LTDLVDDNYF	0.38625	LTDLVDNYF	0.0134468	13.2422	HLA-A*01:01	-0.20273	-1.87138	-1.66865	0.0214461	0.546832	0.875122	Yes
FSEEKIQYLVY	0.921031	FSEEKIQYY	0.0057617	13.2422	HLA-A*01:01	-0.20273	-2.23945	-2.03672	0.00918925	0.546832	0.875122	Yes
FLDTNETPYF	0.283661	FLDNETPYF	0.015617	13.2422	HLA-A*01:01	-0.20273	-1.8064	-1.60367	0.0249074	0.546832	0.875122	Yes
KLDSLLLFY	0.944209	KLDSLLLFY	0.00490213	13.2422	HLA-A*01:01	-0.20273	-2.30962	-2.10689	0.00781833	0.546832	0.875122	Yes
WSEITELLY	0.974324	WSEITELLY	0.00300426	13.2422	HLA-A*01:01	-0.20273	-2.52226	-2.31953	0.00479144	0.546832	0.875122	Yes
LDVAGRVMQY	0.15781	LVAGRVMQY	0.0202638	13.2422	HLA-A*01:01	-0.20273	-1.69328	-1.49055	0.0323185	0.546832	0.875122	Yes
GTDLSIFKY	0.991315	GTDLSIFKY	0.000961702	13.2422	HLA-A*01:01	-0.20273	-3.01696	-2.81423	0.0015338	0.546832	0.875122	Yes
YSDVAKGILQY	0.990501	YSDKGILQY	0.00107234	13.2422	HLA-A*01:01	-0.20273	-2.96967	-2.76694	0.00171026	0.546832	0.875122	Yes
ETEEDKFLLLY	0.965345	ETEEDLLLY	0.00368511	13.2422	HLA-A*01:01	-0.20273	-2.43355	-2.23082	0.00587732	0.546832	0.875122	Yes
STDLQDYTYY	0.9927	STDLQDTYY	0.000774468	13.2422	HLA-A*01:01	-0.20273	-3.111	-2.90827	0.00123519	0.546832	0.875122	Yes
LDLAQRTLY	0.12918	LDLAQRTLY	0.0221787	13.2422	HLA-A*01:01	-0.20273	-1.65406	-1.45133	0.0353725	0.546832	0.875122	Yes
YIEFHSQSGFY	0.702766	YIESQSGFY	0.00956596	13.2422	HLA-A*01:01	-0.20273	-2.01927	-1.81654	0.0152566	0.546832	0.875122	Yes
LIDLAIDTY	0.868789	LIDLAIDTY	0.00737021	13.2422	HLA-A*01:01	-0.20273	-2.13252	-1.92979	0.0117546	0.546832	0.875122	Yes
YSDKYGLGY	0.997822	YSDKYGLGY	0.000102128	13.2422	HLA-A*01:01	-0.20273	-3.99086	-3.78813	0.000162882	0.546832	0.875122	Yes
LTEEFRLNY	0.974835	LTEEFRLNY	0.00292766	13.2422	HLA-A*01:01	-0.20273	-2.53348	-2.33075	0.00466928	0.546832	0.875122	Yes
DLDSRVLYY	0.977012	DLDSRVLYY	0.00270638	13.2422	HLA-A*01:01	-0.20273	-2.56761	-2.36488	0.00431637	0.546832	0.875122	Yes
NTQPIPILY	0.974088	NTQPIPILY	0.00302979	13.2422	HLA-A*01:01	-0.20273	-2.51859	-2.31586	0.00483216	0.546832	0.875122	Yes
SLDVGGPLRY	0.965524	SLDGGPLRY	0.00366809	13.2422	HLA-A*01:01	-0.20273	-2.43556	-2.23283	0.00585018	0.546832	0.875122	Yes
ELDQRLFENY	0.643897	ELDQRLFEY	0.0102043	13.2422	HLA-A*01:01	-0.20273	-1.99122	-1.78849	0.0162746	0.546832	0.875122	Yes
LDLAQRTLY	0.12918	LDLAQRTLY	0.0221702	13.2422	HLA-A*01:01	-0.20273	-1.65423	-1.4515	0.035359	0.546832	0.875122	Yes
ISDLNELLK	0.328722	ISDLNELLK	0.0145191	13.2422	HLA-A*01:01	-0.20273	-1.83806	-1.63533	0.0231564	0.546832	0.875122	Yes
VLDSEGYLLFY	0.942645	VLDSEGLFY	0.00495319	13.2422	HLA-A*01:01	-0.20273	-2.30511	-2.10239	0.00789977	0.546832	0.875122	Yes
TTDFPGNYSGY	0.983961	TTDFPGNYY	0.0019234	13.2422	HLA-A*01:01	-0.20273	-2.71593	-2.5132	0.00306761	0.546832	0.875122	Yes
EVDPDTILK	0.323199	EVDPDTILK	0.0146723	13.2422	HLA-A*01:01	-0.20273	-1.8335	-1.63077	0.0234007	0.546832	0.875122	Yes
RVDVFTNLGY	0.838992	RVDVFTNLY	0.00789787	13.2422	HLA-A*01:01	-0.20273	-2.10249	-1.89976	0.0125962	0.546832	0.875122	Yes
LTDTFYYRL	0.331156	LTDTFYYRL	0.0144596	13.2422	HLA-A*01:01	-0.20273	-1.83984	-1.63711	0.0230614	0.546832	0.875122	Yes
YSFLDKMSFY	0.677649	YSFDKMSFY	0.00982979	13.2422	HLA-A*01:01	-0.20273	-2.00746	-1.80473	0.0156774	0.546832	0.875122	Yes
VLDVVYLVY	0.864397	VLDVVYLVY	0.00750638	13.2422	HLA-A*01:01	-0.20273	-2.12457	-1.92184	0.0119718	0.546832	0.875122	Yes
FSDLNLEAHMY	0.96918	FSDLEAHMY	0.0034383	13.2422	HLA-A*01:01	-0.20273	-2.46366	-2.26093	0.00548369	0.546832	0.875122	Yes
ATDLAYYLV	0.272412	ATDLAYYLV	0.015983	13.2422	HLA-A*01:01	-0.20273	-1.79634	-1.59361	0.025491	0.546832	0.875122	Yes
NMDTFSNLLY	0.940611	NMDTSNLLY	0.00502128	13.2422	HLA-A*01:01	-0.20273	-2.29919	-2.09646	0.00800836	0.546832	0.875122	Yes
ILDEFLQTY	0.969719	ILDEFLQTY	0.00340426	13.2422	HLA-A*01:01	-0.20273	-2.46798	-2.26525	0.0054294	0.546832	0.875122	Yes
VLDEAFQRY	0.980039	VLDEAFQRY	0.0024	13.2422	HLA-A*01:01	-0.20273	-2.61979	-2.41706	0.00382773	0.546832	0.875122	Yes
LSDLGRLSY	0.993585	LSDLGRLSY	0.000629787	13.2422	HLA-A*01:01	-0.20273	-3.20081	-2.99808	0.00100444	0.546832	0.875122	Yes
AVDVNNMLHLY	0.901757	AVDVNNHLY	0.00648511	13.2422	HLA-A*01:01	-0.20273	-2.18808	-1.98535	0.010343	0.546832	0.875122	Yes
LLELLHELY	0.805411	LLELLHELY	0.00840851	13.2422	HLA-A*01:01	-0.20273	-2.07528	-1.87255	0.0134106	0.546832	0.875122	Yes
YSAEPLPELCY	0.818019	YSAEPELCY	0.00822128	13.2422	HLA-A*01:01	-0.20273	-2.08506	-1.88233	0.013112	0.546832	0.875122	Yes
STDHIPILY	0.998787	STDHIPILY	1.70213e-05	13.2422	HLA-A*01:01	-0.20273	-4.76901	-4.56628	2.7147e-05	0.546832	0.875122	Yes
MTEKFLFLY	0.964844	MTEKFLFLY	0.00373617	13.2422	HLA-A*01:01	-0.20273	-2.42757	-2.22484	0.00595876	0.546832	0.875122	Yes
YSEVYPGQQY	0.984629	YSEYPGQQY	0.00184681	13.2422	HLA-A*01:01	-0.20273	-2.73358	-2.53085	0.00294545	0.546832	0.875122	Yes
YADNQVMHFY	0.981602	YADNQVHFY	0.0022383	13.2422	HLA-A*01:01	-0.20273	-2.65008	-2.44735	0.00356983	0.546832	0.875122	Yes
VTEIRQYFY	0.974681	VTEIRQYFY	0.00294468	13.2422	HLA-A*01:01	-0.20273	-2.53096	-2.32823	0.00469643	0.546832	0.875122	Yes
WTDILSHGRY	0.964901	WTDILSHRY	0.00371915	13.2422	HLA-A*01:01	-0.20273	-2.42956	-2.22683	0.00593162	0.546832	0.875122	Yes
DADYPLRVLY	0.830193	DADPLRVLY	0.00802553	13.2422	HLA-A*01:01	-0.20273	-2.09553	-1.8928	0.0127998	0.546832	0.875122	Yes
ATDRWYDEY	0.986881	ATDRWYDEY	0.00157447	13.2422	HLA-A*01:01	-0.20273	-2.80287	-2.60014	0.0025111	0.546832	0.875122	Yes
LIDTLLDGY	0.826576	LIDTLLDGY	0.0080766	13.2422	HLA-A*01:01	-0.20273	-2.09277	-1.89004	0.0128812	0.546832	0.875122	Yes
LTDYDIRFY	0.985719	LTDYDIRFY	0.00171064	13.2422	HLA-A*01:01	-0.20273	-2.76684	-2.56411	0.00272827	0.546832	0.875122	Yes
YTEAEEFFVKY	0.957979	YTEAEEVKY	0.00419574	13.2422	HLA-A*01:01	-0.20273	-2.37719	-2.17446	0.00669173	0.546832	0.875122	Yes
LTETIYKNYY	0.901872	LTETIKNYY	0.00645957	13.2422	HLA-A*01:01	-0.20273	-2.1898	-1.98707	0.0103023	0.546832	0.875122	Yes
VTDHLGVVY	0.990707	VTDHLGVVY	0.0010383	13.2422	HLA-A*01:01	-0.20273	-2.98368	-2.78095	0.00165597	0.546832	0.875122	Yes
STESMDFLKY	0.979315	STESDFLKY	0.00251915	13.2422	HLA-A*01:01	-0.20273	-2.59875	-2.39602	0.00401775	0.546832	0.875122	Yes
WSERLMTAY	0.851069	WSERLMTAY	0.00775319	13.2422	HLA-A*01:01	-0.20273	-2.11052	-1.90779	0.0123655	0.546832	0.875122	Yes
WLEEGIHWQY	0.773497	WLEEGIHQY	0.00881702	13.2422	HLA-A*01:01	-0.20273	-2.05468	-1.85195	0.0140621	0.546832	0.875122	Yes
KTDDLTMVLY	0.994472	KTDDLTMLY	0.000519149	13.2422	HLA-A*01:01	-0.20273	-3.28471	-3.08198	0.000827983	0.546832	0.875122	Yes
WVDSDQLLY	0.992242	WVDSDQLLY	0.000834043	13.2422	HLA-A*01:01	-0.20273	-3.07881	-2.87608	0.0013302	0.546832	0.875122	Yes
MSDLLSPILY	0.987489	MSDLSPILY	0.00151489	13.2422	HLA-A*01:01	-0.20273	-2.81962	-2.61689	0.00241608	0.546832	0.875122	Yes
KTDDLTMVLY	0.994472	KTDDLTMLY	0.00052766	13.2422	HLA-A*01:01	-0.20273	-3.27765	-3.07492	0.000841557	0.546832	0.875122	Yes
LLEGDIHGQYY	0.849753	LLDIHGQYY	0.00777021	13.2422	HLA-A*01:01	-0.20273	-2.10957	-1.90684	0.0123926	0.546832	0.875122	Yes
EIDGRSISLYY	0.883915	EIDSISLYY	0.00691915	13.2422	HLA-A*01:01	-0.20273	-2.15995	-1.95722	0.0110353	0.546832	0.875122	Yes
MSDSYLPSYY	0.989657	MSDSYPSYY	0.00122553	13.2422	HLA-A*01:01	-0.20273	-2.91168	-2.70895	0.00195458	0.546832	0.875122	Yes
LTDRLWFKSTY	0.831369	LTDRFKSTY	0.00800851	13.2422	HLA-A*01:01	-0.20273	-2.09645	-1.89372	0.0127727	0.546832	0.875122	Yes
VADLHLYLY	0.983369	VADLHLYLY	0.00200851	13.2422	HLA-A*01:01	-0.20273	-2.69713	-2.4944	0.00320334	0.546832	0.875122	Yes
IADSNYNWFY	0.894346	IADSNNWFY	0.00668936	13.2422	HLA-A*01:01	-0.20273	-2.17462	-1.97189	0.0106688	0.546832	0.875122	Yes
ALDVVNLVY	0.939555	ALDVVNLVY	0.00510638	13.2422	HLA-A*01:01	-0.20273	-2.29189	-2.08916	0.0081441	0.546832	0.875122	Yes
YLFEPHSGEEY	0.37651	YLFEPGEEY	0.0135489	13.2422	HLA-A*01:01	-0.20273	-1.86809	-1.66537	0.021609	0.546832	0.875122	Yes
LSDIGSGIRY	0.98513	LSDGSGIRY	0.00178723	13.2422	HLA-A*01:01	-0.20273	-2.74782	-2.54509	0.00285043	0.546832	0.875122	Yes
SADLVALSY	0.98436	SADLVALSY	0.00186383	13.2422	HLA-A*01:01	-0.20273	-2.72959	-2.52686	0.0029726	0.546832	0.875122	Yes
AIDEDVLRY	0.978742	AIDEDVLRY	0.00259574	13.2422	HLA-A*01:01	-0.20273	-2.58574	-2.38301	0.00413992	0.546832	0.875122	Yes
ILDEVIMGY	0.957072	ILDEVIMGY	0.00425532	13.2422	HLA-A*01:01	-0.20273	-2.37107	-2.16834	0.00678675	0.546832	0.875122	Yes
ITELLYKDGRY	0.625669	ITELKDGRY	0.0104511	13.2422	HLA-A*01:01	-0.20273	-1.98084	-1.77811	0.0166682	0.546832	0.875122	Yes
VTEEIFLEY	0.993976	VTEEIFLEY	0.000578723	13.2422	HLA-A*01:01	-0.20273	-3.23753	-3.0348	0.000922998	0.546832	0.875122	Yes
RADQELLMY	0.968535	RADQELLMY	0.00349787	13.2422	HLA-A*01:01	-0.20273	-2.4562	-2.25347	0.00557871	0.546832	0.875122	Yes
LSELAALCY	0.939094	LSELAALCY	0.00511489	13.2422	HLA-A*01:01	-0.20273	-2.29116	-2.08843	0.00815767	0.546832	0.875122	Yes
LLDPKYGMFRY	0.869113	LLDPGMFRY	0.00735319	13.2422	HLA-A*01:01	-0.20273	-2.13352	-1.93079	0.0117275	0.546832	0.875122	Yes
MIEPRTLQY	0.97027	MIEPRTLQY	0.00334468	13.2422	HLA-A*01:01	-0.20273	-2.47565	-2.27292	0.00533438	0.546832	0.875122	Yes
DIDIRKDLY	0.818916	DIDIRKDLY	0.00817872	13.2422	HLA-A*01:01	-0.20273	-2.08731	-1.88458	0.0130441	0.546832	0.875122	Yes
FAEMIQPEY	0.901844	FAEMIQPEY	0.00646809	13.2422	HLA-A*01:01	-0.20273	-2.18922	-1.98649	0.0103159	0.546832	0.875122	Yes
YLENLEKLMY	0.864519	YLENEKLMY	0.00748936	13.2422	HLA-A*01:01	-0.20273	-2.12556	-1.92283	0.0119447	0.546832	0.875122	Yes
NSLFLTDLY	0.645997	NSLFLTDLY	0.0101787	13.2422	HLA-A*01:01	-0.20273	-1.99231	-1.78958	0.0162339	0.546832	0.875122	Yes
AVDPRFLAY	0.987881	AVDPRFLAY	0.0014383	13.2422	HLA-A*01:01	-0.20273	-2.84215	-2.63942	0.00229392	0.546832	0.875122	Yes
LEDGRTLSDY	0.290303	LEDGRTLSY	0.0154553	13.2422	HLA-A*01:01	-0.20273	-1.81092	-1.60819	0.0246495	0.546832	0.875122	Yes
SDPWQQELY	0.177816	SDPWQQELY	0.0192	13.2422	HLA-A*01:01	-0.20273	-1.7167	-1.51397	0.0306218	0.546832	0.875122	Yes
LADVNNIGKY	0.75661	LADVNNIKY	0.00900426	13.2422	HLA-A*01:01	-0.20273	-2.04555	-1.84282	0.0143608	0.546832	0.875122	Yes
LSDPCPGLYL	0.480597	LSDPPGLYL	0.011983	13.2422	HLA-A*01:01	-0.20273	-1.92144	-1.71871	0.0191115	0.546832	0.875122	Yes
YSDEFGNLDF	0.693058	YSDEFGNLF	0.00965957	13.2422	HLA-A*01:01	-0.20273	-2.01504	-1.81231	0.0154059	0.546832	0.875122	Yes
LTDPAIVKV	0.524107	LTDPAIVKV	0.0115319	13.2422	HLA-A*01:01	-0.20273	-1.9381	-1.73537	0.0183921	0.546832	0.875122	Yes
TVEELTDTFYY	0.814915	TVEEDTFYY	0.00830638	13.2422	HLA-A*01:01	-0.20273	-2.08059	-1.87786	0.0132477	0.546832	0.875122	Yes
TTDFIYQLY	0.996821	TTDFIYQLY	0.000255319	13.2422	HLA-A*01:01	-0.20273	-3.59292	-3.39019	0.000407205	0.546832	0.875122	Yes
LTDFIREEY	0.992881	LTDFIREEY	0.000731915	13.2422	HLA-A*01:01	-0.20273	-3.13554	-2.93281	0.00116732	0.546832	0.875122	Yes
VLDSLLVQY	0.958787	VLDSLLVQY	0.00414468	13.2422	HLA-A*01:01	-0.20273	-2.38251	-2.17978	0.00661029	0.546832	0.875122	Yes
TTDFIFNLY	0.995518	TTDFIFNLY	0.000374468	13.2422	HLA-A*01:01	-0.20273	-3.42659	-3.22386	0.000597234	0.546832	0.875122	Yes
LLEELPILY	0.939735	LLEELPILY	0.00509787	13.2422	HLA-A*01:01	-0.20273	-2.29261	-2.08988	0.00813052	0.546832	0.875122	Yes
FLEQVHQLY	0.960341	FLEQVHQLY	0.00403404	13.2422	HLA-A*01:01	-0.20273	-2.39426	-2.19153	0.00643384	0.546832	0.875122	Yes
FLNDSYLKY	0.907055	FLNDSYLKY	0.00620426	13.2422	HLA-A*01:01	-0.20273	-2.20731	-2.00458	0.00989508	0.546832	0.875122	Yes
VTDTGALYLY	0.996054	VTDTGALLY	0.000306383	13.2422	HLA-A*01:01	-0.20273	-3.51374	-3.31101	0.000488646	0.546832	0.875122	Yes
SADVPLVVEY	0.901141	SADPLVVEY	0.00651064	13.2422	HLA-A*01:01	-0.20273	-2.18638	-1.98365	0.0103837	0.546832	0.875122	Yes
RIDLIPSLY	0.952523	RIDLIPSLY	0.00444255	13.2422	HLA-A*01:01	-0.20273	-2.35237	-2.14964	0.00708536	0.546832	0.875122	Yes
ILDIPNQLYY	0.975651	ILDPNQLYY	0.00284255	13.2422	HLA-A*01:01	-0.20273	-2.54629	-2.34356	0.00453355	0.546832	0.875122	Yes
YMELYTHVY	0.876097	YMELYTHVY	0.00716596	13.2422	HLA-A*01:01	-0.20273	-2.14473	-1.942	0.0114289	0.546832	0.875122	Yes
YLDLLLGNCY	0.73317	YLDLLGNCY	0.00921702	13.2422	HLA-A*01:01	-0.20273	-2.03541	-1.83268	0.0147001	0.546832	0.875122	Yes
ELDPMAMTQKY	0.903064	ELDPMTQKY	0.0064	13.2422	HLA-A*01:01	-0.20273	-2.19382	-1.99109	0.0102073	0.546832	0.875122	Yes
NLDFQMEQY	0.94697	NLDFQMEQY	0.00474043	13.2422	HLA-A*01:01	-0.20273	-2.32418	-2.12145	0.00756044	0.546832	0.875122	Yes
IVDEAIYY	0.705699	IVDEA-IYY	0.00954043	13.2422	HLA-A*01:01	-0.20273	-2.02043	-1.8177	0.0152159	0.546832	0.875122	Yes
NTDSPLRY	0.96755	NTD-SPLRY	0.00354894	13.2422	HLA-A*01:01	-0.20273	-2.4499	-2.24717	0.00566015	0.546832	0.875122	Yes
VNLPINGNGKQ	4.7e-05	VPINGNGKQ	0.785609	13.2422	HLA-A*01:01	-0.20273	-0.104794	0.0979357	1.25296	0.546832	0.875122	Yes
HLDFNLDKTLY	0.828153	HLDFDKTLY	0.00805957	13.2422	HLA-A*01:01	-0.20273	-2.09369	-1.89096	0.0128541	0.546832	0.875122	Yes
TTEVHPELY	0.995511	TTEVHPELY	0.000382979	13.2422	HLA-A*01:01	-0.20273	-3.41683	-3.2141	0.000610807	0.546832	0.875122	Yes
ILEVDLKNGY	0.369721	ILEDLKNGY	0.0136851	13.2422	HLA-A*01:01	-0.20273	-1.86375	-1.66102	0.0218262	0.546832	0.875122	Yes
TTDCLQILAY	0.975888	TTDLQILAY	0.00281702	13.2422	HLA-A*01:01	-0.20273	-2.55021	-2.34748	0.00449283	0.546832	0.875122	Yes
YLDSIPPGQYM	0.497355	YLDSPPGQY	0.0118128	13.2422	HLA-A*01:01	-0.20273	-1.92765	-1.72492	0.01884	0.546832	0.875122	Yes
FIDAQFEAY	0.947767	FIDAQFEAY	0.00471489	13.2422	HLA-A*01:01	-0.20273	-2.32653	-2.1238	0.00751972	0.546832	0.875122	Yes
LSDIGLEY	0.919962	LSD-IGLEY	0.00578723	13.2422	HLA-A*01:01	-0.20273	-2.23753	-2.0348	0.00922998	0.546832	0.875122	Yes
DTDISLIRY	0.991543	DTDISLIRY	0.00093617	13.2422	HLA-A*01:01	-0.20273	-3.02865	-2.82592	0.00149308	0.546832	0.875122	Yes
YTDKIMTYL	0.683451	YTDKIMTYL	0.00978723	13.2422	HLA-A*01:01	-0.20273	-2.00934	-1.80661	0.0156095	0.546832	0.875122	Yes
LLDTTEKYLY	0.905397	LLDTTEYLY	0.00629787	13.2422	HLA-A*01:01	-0.20273	-2.20081	-1.99808	0.0100444	0.546832	0.875122	Yes
NTDHQTQLLY	0.997385	NTDHQTLLY	0.00012766	13.2422	HLA-A*01:01	-0.20273	-3.89395	-3.69122	0.000203602	0.546832	0.875122	Yes
ATDIFSYLVEY	0.92596	ATDSYLVEY	0.00560851	13.2422	HLA-A*01:01	-0.20273	-2.25115	-2.04842	0.00894493	0.546832	0.875122	Yes
YLDQISRYY	0.98314	YLDQISRYY	0.00205106	13.2422	HLA-A*01:01	-0.20273	-2.68802	-2.48529	0.00327121	0.546832	0.875122	Yes
TLDAGKFQIY	0.894279	TLDAGKFQY	0.00669787	13.2422	HLA-A*01:01	-0.20273	-2.17406	-1.97133	0.0106823	0.546832	0.875122	Yes
SSDPKVLTL	0.689394	SSDPKVLTL	0.00970213	13.2422	HLA-A*01:01	-0.20273	-2.01313	-1.8104	0.0154738	0.546832	0.875122	Yes
NTDGFLLPKY	0.970105	NTDGFLLKY	0.0033617	13.2422	HLA-A*01:01	-0.20273	-2.47344	-2.27071	0.00536153	0.546832	0.875122	Yes
LTFVPSAEDFY	0.388117	LTFSAEDFY	0.0134298	13.2422	HLA-A*01:01	-0.20273	-1.87193	-1.6692	0.021419	0.546832	0.875122	Yes
LEWDDSTLSY	0.535519	LEDDSTLSY	0.0113617	13.2422	HLA-A*01:01	-0.20273	-1.94456	-1.74183	0.0181206	0.546832	0.875122	Yes
YADLSLKY	0.877957	YAD-LSLKY	0.00706383	13.2422	HLA-A*01:01	-0.20273	-2.15096	-1.94823	0.011266	0.546832	0.875122	Yes
ITDFINILHRY	0.960021	ITDNILHRY	0.00409362	13.2422	HLA-A*01:01	-0.20273	-2.38789	-2.18516	0.00652885	0.546832	0.875122	Yes
DTEKELQALY	0.934508	DTEKEQALY	0.00525957	13.2422	HLA-A*01:01	-0.20273	-2.27905	-2.07632	0.00838842	0.546832	0.875122	Yes
YIDPIAMEY	0.994336	YIDPIAMEY	0.000553191	13.2422	HLA-A*01:01	-0.20273	-3.25712	-3.0544	0.000882277	0.546832	0.875122	Yes
MIDPSGVSY	0.98556	MIDPSGVSY	0.00173617	13.2422	HLA-A*01:01	-0.20273	-2.76041	-2.55768	0.00276899	0.546832	0.875122	Yes
EIDILRTLY	0.908813	EIDILRTLY	0.00618723	13.2422	HLA-A*01:01	-0.20273	-2.2085	-2.00577	0.00986793	0.546832	0.875122	Yes
HTELDTAFMY	0.975099	HTEDTAFMY	0.00290213	13.2422	HLA-A*01:01	-0.20273	-2.53728	-2.33455	0.00462856	0.546832	0.875122	Yes
YSESSQLLYL	0.854632	YSESSQLLY	0.00765957	13.2422	HLA-A*01:01	-0.20273	-2.1158	-1.91307	0.0122161	0.546832	0.875122	Yes
TTDCSFIFLY	0.965671	TTDSFIFLY	0.00365957	13.2422	HLA-A*01:01	-0.20273	-2.43657	-2.23384	0.0058366	0.546832	0.875122	Yes
LTEINRSFKEY	0.578942	LTEINRSEY	0.0109532	13.2422	HLA-A*01:01	-0.20273	-1.96046	-1.75773	0.0174691	0.546832	0.875122	Yes
LSDSFSDLY	0.996599	LSDSFSDLY	0.00027234	13.2422	HLA-A*01:01	-0.20273	-3.56489	-3.36216	0.000434352	0.546832	0.875122	Yes
TESQQIRYF	0.0139	TESQQIRYF	0.0579745	13.2422	HLA-A*01:01	-0.20273	-1.23676	-1.03403	0.0924626	0.546832	0.875122	Yes
VTDAVALRV	0.592948	VTDAVALRV	0.0108426	13.2422	HLA-A*01:01	-0.20273	-1.96487	-1.76214	0.0172926	0.546832	0.875122	Yes
VTENLRLSLY	0.945368	VTENLLSLY	0.00483404	13.2422	HLA-A*01:01	-0.20273	-2.31569	-2.11296	0.00770974	0.546832	0.875122	Yes
FIDFLIDTY	0.874691	FIDFLIDTY	0.00722553	13.2422	HLA-A*01:01	-0.20273	-2.14113	-1.9384	0.0115239	0.546832	0.875122	Yes
MTDPIRILV	0.668693	MTDPIRILV	0.00998298	13.2422	HLA-A*01:01	-0.20273	-2.00074	-1.79801	0.0159217	0.546832	0.875122	Yes
FTDESYLELY	0.997199	FTDESYLLY	0.000144681	13.2422	HLA-A*01:01	-0.20273	-3.83959	-3.63686	0.000230749	0.546832	0.875122	Yes
MIDPSGVSY	0.98556	MIDPSGVSY	0.00172766	13.2422	HLA-A*01:01	-0.20273	-2.76254	-2.55981	0.00275542	0.546832	0.875122	Yes
FGEKNGSWLY	0.610445	FGENGSWLY	0.0105957	13.2422	HLA-A*01:01	-0.20273	-1.97487	-1.77214	0.016899	0.546832	0.875122	Yes
EADGAAWVLLY	0.923415	EADGAALLY	0.00571064	13.2422	HLA-A*01:01	-0.20273	-2.24332	-2.04059	0.00910781	0.546832	0.875122	Yes
FSEFLINTY	0.950211	FSEFLINTY	0.00459574	13.2422	HLA-A*01:01	-0.20273	-2.33764	-2.13491	0.00732969	0.546832	0.875122	Yes
TDIQGALSAY	0.141052	TDIQGALSY	0.0213362	13.2422	HLA-A*01:01	-0.20273	-1.67088	-1.46815	0.0340287	0.546832	0.875122	Yes
WVDVAHLVLY	0.848424	WVDVAHLLY	0.00777872	13.2422	HLA-A*01:01	-0.20273	-2.10909	-1.90636	0.0124062	0.546832	0.875122	Yes
YQDLLQLQY	0.950884	YQDLLQLQY	0.0045617	13.2422	HLA-A*01:01	-0.20273	-2.34087	-2.13814	0.00727539	0.546832	0.875122	Yes
ATESPLDFTKY	0.939858	ATESPLDFY	0.00508936	13.2422	HLA-A*01:01	-0.20273	-2.29334	-2.09061	0.00811695	0.546832	0.875122	Yes
EAEPHPLWEY	0.913663	EAEPHPLEY	0.00601702	13.2422	HLA-A*01:01	-0.20273	-2.22062	-2.01789	0.00959646	0.546832	0.875122	Yes
TTSHLMGMFY	0.668923	TTSHLGMFY	0.00996596	13.2422	HLA-A*01:01	-0.20273	-2.00148	-1.79875	0.0158946	0.546832	0.875122	Yes
AIDRLVNIY	0.837141	AIDRLVNIY	0.00791489	13.2422	HLA-A*01:01	-0.20273	-2.10155	-1.89883	0.0126233	0.546832	0.875122	Yes
SSEVVTVFQYY	0.867227	SSEVVTQYY	0.00742128	13.2422	HLA-A*01:01	-0.20273	-2.12952	-1.92679	0.0118361	0.546832	0.875122	Yes
PTAVVPLRY	0.823826	PTAVVPLRY	0.00812766	13.2422	HLA-A*01:01	-0.20273	-2.09003	-1.8873	0.0129627	0.546832	0.875122	Yes
FSEPRAIFY	0.993394	FSEPRAIFY	0.00067234	13.2422	HLA-A*01:01	-0.20273	-3.17241	-2.96968	0.00107231	0.546832	0.875122	Yes
LDVAGRVMQY	0.15781	LVAGRVMQY	0.0202553	13.2422	HLA-A*01:01	-0.20273	-1.69346	-1.49073	0.0323049	0.546832	0.875122	Yes
PSDLTVGQFY	0.94276	PSDTVGQFY	0.00494468	13.2422	HLA-A*01:01	-0.20273	-2.30586	-2.10313	0.0078862	0.546832	0.875122	Yes
HTDIQEYIGCY	0.915417	HTDIQEYIY	0.00594043	13.2422	HLA-A*01:01	-0.20273	-2.22618	-2.02345	0.0094743	0.546832	0.875122	Yes
YTGTPDWLY	0.955548	YTGTPDWLY	0.00431489	13.2422	HLA-A*01:01	-0.20273	-2.36503	-2.1623	0.00688176	0.546832	0.875122	Yes
YTMKEVLFY	0.959726	YTMKEVLFY	0.00411064	13.2422	HLA-A*01:01	-0.20273	-2.38609	-2.18336	0.006556	0.546832	0.875122	Yes
FVDILTNWY	0.894805	FVDILTNWY	0.00665532	13.2422	HLA-A*01:01	-0.20273	-2.17683	-1.9741	0.0106145	0.546832	0.875122	Yes
VLEHVPLLLY	0.79524	VLEHVPLLY	0.00862128	13.2422	HLA-A*01:01	-0.20273	-2.06443	-1.8617	0.0137499	0.546832	0.875122	Yes
SSDVLVFDY	0.956178	SSDVLVFDY	0.00430638	13.2422	HLA-A*01:01	-0.20273	-2.36589	-2.16316	0.00686819	0.546832	0.875122	Yes
HIDLGIKY	0.504306	HID-LGIKY	0.0117191	13.2422	HLA-A*01:01	-0.20273	-1.9311	-1.72837	0.0186907	0.546832	0.875122	Yes
ATELDAWLAKY	0.881074	ATELDAWLY	0.00700426	13.2422	HLA-A*01:01	-0.20273	-2.15464	-1.95191	0.011171	0.546832	0.875122	Yes
LSDSLFLEV	0.393696	LSDSLFLEV	0.0133277	13.2422	HLA-A*01:01	-0.20273	-1.87525	-1.67252	0.0212561	0.546832	0.875122	Yes
EIDHAEYYLY	0.820524	EIDHAEYLY	0.00817021	13.2422	HLA-A*01:01	-0.20273	-2.08777	-1.88504	0.0130306	0.546832	0.875122	Yes
LMEEVQTLYY	0.877824	LMEEQTLYY	0.00708085	13.2422	HLA-A*01:01	-0.20273	-2.14991	-1.94719	0.0112931	0.546832	0.875122	Yes
YVEKFALNY	0.911539	YVEKFALNY	0.00608511	13.2422	HLA-A*01:01	-0.20273	-2.21573	-2.013	0.00970505	0.546832	0.875122	Yes
TPIVPLLY	0.115384	-TPIVPLLY	0.0231745	13.2422	HLA-A*01:01	-0.20273	-1.63499	-1.43226	0.0369606	0.546832	0.875122	Yes
FADGFVLVY	0.967076	FADGFVLVY	0.00359149	13.2422	HLA-A*01:01	-0.20273	-2.44473	-2.242	0.00572801	0.546832	0.875122	Yes
SSDGAISLLTY	0.980246	SSDGAISLY	0.00234043	13.2422	HLA-A*01:01	-0.20273	-2.63071	-2.42798	0.00373271	0.546832	0.875122	Yes
VTDHLGVVYY	0.985955	VTDHGVVYY	0.0016766	13.2422	HLA-A*01:01	-0.20273	-2.77557	-2.57284	0.00267398	0.546832	0.875122	Yes
YTFPNGAKY	0.938658	YTFPNGAKY	0.00513191	13.2422	HLA-A*01:01	-0.20273	-2.28972	-2.08699	0.00818482	0.546832	0.875122	Yes
MTEKFLFLY	0.964844	MTEKFLFLY	0.00372766	13.2422	HLA-A*01:01	-0.20273	-2.42856	-2.22583	0.00594519	0.546832	0.875122	Yes
VLDILLEQY	0.928317	VLDILLEQY	0.00551489	13.2422	HLA-A*01:01	-0.20273	-2.25846	-2.05573	0.00879562	0.546832	0.875122	Yes
ISDRLIGIY	0.935576	ISDRLIGIY	0.00520851	13.2422	HLA-A*01:01	-0.20273	-2.28329	-2.08056	0.00830698	0.546832	0.875122	Yes
YTDKIMTYL	0.683451	YTDKIMTYL	0.00977872	13.2422	HLA-A*01:01	-0.20273	-2.00972	-1.80699	0.0155959	0.546832	0.875122	Yes
YTEIDWKAY	0.933575	YTEIDWKAY	0.00530213	13.2422	HLA-A*01:01	-0.20273	-2.27555	-2.07282	0.00845629	0.546832	0.875122	Yes
VLDIPSKY	0.654753	VLD-IPSKY	0.0100936	13.2422	HLA-A*01:01	-0.20273	-1.99595	-1.79322	0.0160982	0.546832	0.875122	Yes
ESEFEMKVYY	0.851728	ESEFEMVYY	0.00773617	13.2422	HLA-A*01:01	-0.20273	-2.11147	-1.90874	0.0123383	0.546832	0.875122	Yes
LQDICPLLY	0.791508	LQDICPLLY	0.00868936	13.2422	HLA-A*01:01	-0.20273	-2.06101	-1.85828	0.0138585	0.546832	0.875122	Yes
LTEILDRY	0.63699	LTE-ILDRY	0.0103149	13.2422	HLA-A*01:01	-0.20273	-1.98654	-1.78381	0.0164511	0.546832	0.875122	Yes
TTEFLYNLY	0.973046	TTEFLYNLY	0.00311489	13.2422	HLA-A*01:01	-0.20273	-2.50656	-2.30383	0.0049679	0.546832	0.875122	Yes
MSDSYLPSYY	0.989657	MSDSYPSYY	0.00123404	13.2422	HLA-A*01:01	-0.20273	-2.90867	-2.70594	0.00196816	0.546832	0.875122	Yes
ITDDQFDFHTY	0.990262	ITDDQFHTY	0.0011234	13.2422	HLA-A*01:01	-0.20273	-2.94946	-2.74673	0.0017917	0.546832	0.875122	Yes
NIDNFLSRY	0.921671	NIDNFLSRY	0.00575319	13.2422	HLA-A*01:01	-0.20273	-2.24009	-2.03736	0.00917568	0.546832	0.875122	Yes
LTDIHGNVLQY	0.989807	LTDGNVLQY	0.0012	13.2422	HLA-A*01:01	-0.20273	-2.92082	-2.71809	0.00191386	0.546832	0.875122	Yes
SLEIRALLY	0.876204	SLEIRALLY	0.00714894	13.2422	HLA-A*01:01	-0.20273	-2.14576	-1.94303	0.0114017	0.546832	0.875122	Yes
YSGLLLPDAQY	0.404213	YSGLPDAQY	0.0131404	13.2422	HLA-A*01:01	-0.20273	-1.88139	-1.67866	0.0209575	0.546832	0.875122	Yes
YSEDHIIGAY	0.977042	YSEDHIIAY	0.00269787	13.2422	HLA-A*01:01	-0.20273	-2.56898	-2.36625	0.0043028	0.546832	0.875122	Yes
NAPWAVTSL	0.001512	NAPWAVTSL	0.198996	13.2422	HLA-A*01:01	-0.20273	-0.701156	-0.498427	0.317375	0.546832	0.875122	Yes
NTDSPLRYV	0.275966	NTDSPLRYV	0.0158553	13.2422	HLA-A*01:01	-0.20273	-1.79983	-1.5971	0.0252874	0.546832	0.875122	Yes
ASDYFDQLY	0.993285	ASDYFDQLY	0.000689362	13.2422	HLA-A*01:01	-0.20273	-3.16155	-2.95882	0.00109945	0.546832	0.875122	Yes
LLDSSQKNLY	0.95831	LLDSSQNLY	0.0041617	13.2422	HLA-A*01:01	-0.20273	-2.38073	-2.178	0.00663744	0.546832	0.875122	Yes
HVEEISELFY	0.89811	HVEESELFY	0.00657021	13.2422	HLA-A*01:01	-0.20273	-2.18242	-1.97969	0.0104787	0.546832	0.875122	Yes
YLAQDFFDRY	0.521071	YAQDFFDRY	0.0115489	13.2422	HLA-A*01:01	-0.20273	-1.93746	-1.73473	0.0184192	0.546832	0.875122	Yes
FLDTQLESTY	0.926785	FLDTQESTY	0.00556596	13.2422	HLA-A*01:01	-0.20273	-2.25446	-2.05173	0.00887706	0.546832	0.875122	Yes
TDNLELKKLVY	0.140812	TLELKKLVY	0.0213617	13.2422	HLA-A*01:01	-0.20273	-1.67036	-1.46763	0.0340695	0.546832	0.875122	Yes
NTDPSIVMTY	0.99504	NTDPSVMTY	0.000459574	13.2422	HLA-A*01:01	-0.20273	-3.33764	-3.13491	0.000732969	0.546832	0.875122	Yes
YSGYIFDYDYY	0.304655	YSGYDYDYY	0.0151574	13.2422	HLA-A*01:01	-0.20273	-1.81937	-1.61664	0.0241744	0.546832	0.875122	Yes
VLETNLTGTFY	0.647934	VLETTGTFY	0.0101702	13.2422	HLA-A*01:01	-0.20273	-1.99267	-1.78994	0.0162203	0.546832	0.875122	Yes
LAELNQILY	0.923486	LAELNQILY	0.00570213	13.2422	HLA-A*01:01	-0.20273	-2.24396	-2.04123	0.00909424	0.546832	0.875122	Yes
LLDPSVFHVKY	0.919523	LLDPSHVKY	0.00581277	13.2422	HLA-A*01:01	-0.20273	-2.23562	-2.03289	0.0092707	0.546832	0.875122	Yes
LDTRVSEFY	0.181675	LDTRVSEFY	0.0189447	13.2422	HLA-A*01:01	-0.20273	-1.72251	-1.51978	0.0302146	0.546832	0.875122	Yes
SVDPHGFISY	0.980039	SVDPHGFSY	0.00240851	13.2422	HLA-A*01:01	-0.20273	-2.61825	-2.41552	0.0038413	0.546832	0.875122	Yes
LSDLGLISY	0.986753	LSDLGLISY	0.00159149	13.2422	HLA-A*01:01	-0.20273	-2.7982	-2.59547	0.00253824	0.546832	0.875122	Yes
ALDDFTICYF	0.287455	ALDDFTICY	0.0155149	13.2422	HLA-A*01:01	-0.20273	-1.80925	-1.60652	0.0247445	0.546832	0.875122	Yes
YLQNWSHVLSY	0.346858	YLQNHVLSY	0.0141447	13.2422	HLA-A*01:01	-0.20273	-1.84941	-1.64668	0.0225591	0.546832	0.875122	Yes
DSDPWVLMV	0.465849	DSDPWVLMV	0.0122043	13.2422	HLA-A*01:01	-0.20273	-1.91349	-1.71076	0.0194644	0.546832	0.875122	Yes
LLDISGVLY	0.974638	LLDISGVLY	0.00295319	13.2422	HLA-A*01:01	-0.20273	-2.52971	-2.32698	0.00471	0.546832	0.875122	Yes
YQDPDATSLKY	0.902933	YQDPTSLKY	0.00641702	13.2422	HLA-A*01:01	-0.20273	-2.19267	-1.98994	0.0102344	0.546832	0.875122	Yes
RLDINTNTY	0.905375	RLDINTNTY	0.00630638	13.2422	HLA-A*01:01	-0.20273	-2.20022	-1.99749	0.010058	0.546832	0.875122	Yes
FAEMIQPEY	0.901844	FAEMIQPEY	0.0064766	13.2422	HLA-A*01:01	-0.20273	-2.18865	-1.98592	0.0103294	0.546832	0.875122	Yes
FLDDGHTFNY	0.983319	FLDDGHTFY	0.00201702	13.2422	HLA-A*01:01	-0.20273	-2.69529	-2.49256	0.00321692	0.546832	0.875122	Yes
VTEKDLLLY	0.993256	VTEKDLLLY	0.000697872	13.2422	HLA-A*01:01	-0.20273	-3.15622	-2.95349	0.00111303	0.546832	0.875122	Yes
YSDLHAFYY	0.99838	YSDLHAFYY	4.25532e-05	13.2422	HLA-A*01:01	-0.20273	-4.37107	-4.16834	6.78675e-05	0.546832	0.875122	Yes
NSDLNNLLF	0.818693	NSDLNNLLF	0.00821277	13.2422	HLA-A*01:01	-0.20273	-2.08551	-1.88278	0.0130984	0.546832	0.875122	Yes
YTSDYFISY	0.973476	YTSDYFISY	0.00308936	13.2422	HLA-A*01:01	-0.20273	-2.51013	-2.3074	0.00492718	0.546832	0.875122	Yes
VLDFGDLTY	0.969933	VLDFGDLTY	0.00339574	13.2422	HLA-A*01:01	-0.20273	-2.46906	-2.26634	0.00541582	0.546832	0.875122	Yes
LTDPMFRGIY	0.940313	LTDPFRGIY	0.0050383	13.2422	HLA-A*01:01	-0.20273	-2.29772	-2.09499	0.00803551	0.546832	0.875122	Yes
ITDIHIKY	0.925743	ITD-IHIKY	0.00565106	13.2422	HLA-A*01:01	-0.20273	-2.24787	-2.04514	0.0090128	0.546832	0.875122	Yes
RTDAILLGHY	0.922587	RTDAILLHY	0.00572766	13.2422	HLA-A*01:01	-0.20273	-2.24202	-2.03929	0.00913496	0.546832	0.875122	Yes
RSDFFTSFY	0.98306	RSDFFTSFY	0.0020766	13.2422	HLA-A*01:01	-0.20273	-2.68265	-2.47992	0.00331193	0.546832	0.875122	Yes
STELNHLGY	0.985766	STELNHLGY	0.00170213	13.2422	HLA-A*01:01	-0.20273	-2.76901	-2.56628	0.0027147	0.546832	0.875122	Yes
ATEQVSWGHY	0.93224	ATEQVSWHY	0.00537872	13.2422	HLA-A*01:01	-0.20273	-2.26932	-2.06659	0.00857845	0.546832	0.875122	Yes
ELDISDSKIRY	0.811782	ELDDSKIRY	0.00834043	13.2422	HLA-A*01:01	-0.20273	-2.07881	-1.87608	0.013302	0.546832	0.875122	Yes
LLDPASFEYL	0.505622	LLDPASFEY	0.0117021	13.2422	HLA-A*01:01	-0.20273	-1.93174	-1.72901	0.0186636	0.546832	0.875122	Yes
LDTRVSEFY	0.181675	LDTRVSEFY	0.0189532	13.2422	HLA-A*01:01	-0.20273	-1.72232	-1.51959	0.0302282	0.546832	0.875122	Yes
NIDIPEGNWY	0.714169	NIDPEGNWY	0.0094383	13.2422	HLA-A*01:01	-0.20273	-2.02511	-1.82238	0.015053	0.546832	0.875122	Yes
VLDPKVGFY	0.971692	VLDPKVGFY	0.00320851	13.2422	HLA-A*01:01	-0.20273	-2.4937	-2.29097	0.00511721	0.546832	0.875122	Yes
WSEPQSLCY	0.98975	WSEPQSLCY	0.00120851	13.2422	HLA-A*01:01	-0.20273	-2.91775	-2.71502	0.00192744	0.546832	0.875122	Yes
ESENVVCHFY	0.902084	ESENVVHFY	0.00645106	13.2422	HLA-A*01:01	-0.20273	-2.19037	-1.98764	0.0102887	0.546832	0.875122	Yes
NSELSCQLY	0.960594	NSELSCQLY	0.00402553	13.2422	HLA-A*01:01	-0.20273	-2.39518	-2.19245	0.00642026	0.546832	0.875122	Yes
ILDNADVLSQY	0.89416	ILDDVLSQY	0.00670638	13.2422	HLA-A*01:01	-0.20273	-2.17351	-1.97078	0.0106959	0.546832	0.875122	Yes
LSSLPTQMDY	0.693289	LSSLPTQMY	0.00964255	13.2422	HLA-A*01:01	-0.20273	-2.01581	-1.81308	0.0153788	0.546832	0.875122	Yes
VADMALHY	0.611558	VAD-MALHY	0.0105872	13.2422	HLA-A*01:01	-0.20273	-1.97522	-1.77249	0.0168854	0.546832	0.875122	Yes
DSEGYLLFY	0.954167	DSEGYLLFY	0.00437447	13.2422	HLA-A*01:01	-0.20273	-2.35907	-2.15635	0.00697678	0.546832	0.875122	Yes
YSDFFTDCY	0.992558	YSDFFTDCY	0.000791489	13.2422	HLA-A*01:01	-0.20273	-3.10155	-2.89883	0.00126233	0.546832	0.875122	Yes
SLDSPSYVLY	0.975241	SLDSPSYLY	0.00289362	13.2422	HLA-A*01:01	-0.20273	-2.53856	-2.33583	0.00461499	0.546832	0.875122	Yes
VTEGLVDVILY	0.910739	VTEGDVILY	0.00612766	13.2422	HLA-A*01:01	-0.20273	-2.21271	-2.00998	0.00977292	0.546832	0.875122	Yes
YSDKYFDEHY	0.984774	YSDKFDEHY	0.00182979	13.2422	HLA-A*01:01	-0.20273	-2.7376	-2.53487	0.0029183	0.546832	0.875122	Yes
TEIRLRLHY	0.111094	TEIRLRLHY	0.0235149	13.2422	HLA-A*01:01	-0.20273	-1.62866	-1.42593	0.0375036	0.546832	0.875122	Yes
LADIYRELY	0.943169	LADIYRELY	0.00492766	13.2422	HLA-A*01:01	-0.20273	-2.30736	-2.10463	0.00785905	0.546832	0.875122	Yes
TADHNLLLYEA	0.090973	TADHNLLLY	0.0256511	13.2422	HLA-A*01:01	-0.20273	-1.59089	-1.38817	0.0409105	0.546832	0.875122	Yes
LLDKGVYGLLY	0.929253	LLDKGGLLY	0.00548936	13.2422	HLA-A*01:01	-0.20273	-2.26048	-2.05775	0.0087549	0.546832	0.875122	Yes
RVYIHPFHL	0.008766	RVYIHPFHL	0.0733362	13.2422	HLA-A*01:01	-0.20273	-1.13468	-0.931952	0.116963	0.546832	0.875122	Yes
SERQLLLY	0.409573	-SERQLLLY	0.0130043	13.2422	HLA-A*01:01	-0.20273	-1.88591	-1.68319	0.0207403	0.546832	0.875122	Yes
YTELEAIMY	0.99254	YTELEAIMY	0.0008	13.2422	HLA-A*01:01	-0.20273	-3.09691	-2.89418	0.00127591	0.546832	0.875122	Yes
LLDFQEFTLY	0.931203	LLDQEFTLY	0.0054383	13.2422	HLA-A*01:01	-0.20273	-2.26454	-2.06181	0.00867346	0.546832	0.875122	Yes
AIDNSRNILY	0.910248	AIDNSNILY	0.00614468	13.2422	HLA-A*01:01	-0.20273	-2.2115	-2.00877	0.00980006	0.546832	0.875122	Yes
LTEYLSTHY	0.98031	LTEYLSTHY	0.00233191	13.2422	HLA-A*01:01	-0.20273	-2.63229	-2.42956	0.00371914	0.546832	0.875122	Yes
ETFLTSPEELY	0.565102	ETTSPEELY	0.0110468	13.2422	HLA-A*01:01	-0.20273	-1.95676	-1.75403	0.0176184	0.546832	0.875122	Yes
LLDPGQRNIY	0.923196	LLDPGQNIY	0.00571915	13.2422	HLA-A*01:01	-0.20273	-2.24267	-2.03994	0.00912139	0.546832	0.875122	Yes
YTFGTKEPLY	0.702556	YTFGTKELY	0.00957447	13.2422	HLA-A*01:01	-0.20273	-2.01889	-1.81616	0.0152702	0.546832	0.875122	Yes
SSDYSIFDNY	0.93652	SSDSIFDNY	0.00516596	13.2422	HLA-A*01:01	-0.20273	-2.28685	-2.08412	0.00823911	0.546832	0.875122	Yes
VIDPESGNTLY	0.966541	VIDPESTLY	0.00362553	13.2422	HLA-A*01:01	-0.20273	-2.44063	-2.2379	0.00578231	0.546832	0.875122	Yes
IVDNPADFY	0.979531	IVDNPADFY	0.00249362	13.2422	HLA-A*01:01	-0.20273	-2.60317	-2.40044	0.00397703	0.546832	0.875122	Yes
RIEEGTYGVVY	0.424846	RIEEGTYVY	0.0127915	13.2422	HLA-A*01:01	-0.20273	-1.89308	-1.69035	0.020401	0.546832	0.875122	Yes
FLEAIENNKY	0.722157	FLEAENNKY	0.00933617	13.2422	HLA-A*01:01	-0.20273	-2.02983	-1.8271	0.0148901	0.546832	0.875122	Yes
NIDLVSKLLY	0.870017	NIDVSKLLY	0.00733617	13.2422	HLA-A*01:01	-0.20273	-2.13453	-1.9318	0.0117004	0.546832	0.875122	Yes
YTLLDVLYY	0.872824	YTLLDVLYY	0.00726809	13.2422	HLA-A*01:01	-0.20273	-2.13858	-1.93585	0.0115918	0.546832	0.875122	Yes
YTIYRPDEGY	0.588513	YTIYRPDEY	0.0108681	13.2422	HLA-A*01:01	-0.20273	-1.96385	-1.76112	0.0173334	0.546832	0.875122	Yes
LLENDVSTLGY	0.730889	LLDVSTLGY	0.0092766	13.2422	HLA-A*01:01	-0.20273	-2.03261	-1.82988	0.0147951	0.546832	0.875122	Yes
TLDPNFLDAY	0.943381	TLDPNFLAY	0.00491915	13.2422	HLA-A*01:01	-0.20273	-2.30811	-2.10538	0.00784548	0.546832	0.875122	Yes
ATDLAQHLY	0.997877	ATDLAQHLY	9.3617e-05	13.2422	HLA-A*01:01	-0.20273	-4.02865	-3.82592	0.000149308	0.546832	0.875122	Yes
VGDLAELLY	0.840491	VGDLAELLY	0.00788085	13.2422	HLA-A*01:01	-0.20273	-2.10343	-1.9007	0.0125691	0.546832	0.875122	Yes
LTEQRALLY	0.993468	LTEQRALLY	0.000646809	13.2422	HLA-A*01:01	-0.20273	-3.18922	-2.98649	0.00103159	0.546832	0.875122	Yes
IIEAQYLRY	0.82342	IIEAQYLRY	0.00813617	13.2422	HLA-A*01:01	-0.20273	-2.08958	-1.88685	0.0129763	0.546832	0.875122	Yes
LVDHFMELY	0.973955	LVDHFMELY	0.0030383	13.2422	HLA-A*01:01	-0.20273	-2.51737	-2.31464	0.00484574	0.546832	0.875122	Yes
LTDILGIEDY	0.958194	LTDILGIEY	0.00417021	13.2422	HLA-A*01:01	-0.20273	-2.37984	-2.17711	0.00665101	0.546832	0.875122	Yes
ITDHGSLIY	0.997724	ITDHGSLIY	0.000119149	13.2422	HLA-A*01:01	-0.20273	-3.92391	-3.72118	0.000190029	0.546832	0.875122	Yes
LIDYDMVHY	0.902503	LIDYDMVHY	0.00644255	13.2422	HLA-A*01:01	-0.20273	-2.19094	-1.98821	0.0102751	0.546832	0.875122	Yes
FIDLNYMVY	0.884512	FIDLNYMVY	0.00690213	13.2422	HLA-A*01:01	-0.20273	-2.16102	-1.95829	0.0110081	0.546832	0.875122	Yes
EIDIPHVWLY	0.925826	EIDPHVWLY	0.00564255	13.2422	HLA-A*01:01	-0.20273	-2.24852	-2.04579	0.00899923	0.546832	0.875122	Yes
SIDPGADLSQY	0.954025	SIDPGADLY	0.00439149	13.2422	HLA-A*01:01	-0.20273	-2.35739	-2.15466	0.00700392	0.546832	0.875122	Yes
AEILLSNHY	0.072695	AEILLSNHY	0.0281447	13.2422	HLA-A*01:01	-0.20273	-1.5506	-1.34787	0.0448875	0.546832	0.875122	Yes
YLDSIPPGQYM	0.497355	YLDSPPGQY	0.0118043	13.2422	HLA-A*01:01	-0.20273	-1.92796	-1.72523	0.0188264	0.546832	0.875122	Yes
YSEYPPFSHRY	0.981023	YSEPFSHRY	0.00229787	13.2422	HLA-A*01:01	-0.20273	-2.63867	-2.43594	0.00366484	0.546832	0.875122	Yes
LSDFGLERY	0.992733	LSDFGLERY	0.000757447	13.2422	HLA-A*01:01	-0.20273	-3.12065	-2.91792	0.00120804	0.546832	0.875122	Yes
YTMKEVLFY	0.959726	YTMKEVLFY	0.00410213	13.2422	HLA-A*01:01	-0.20273	-2.38699	-2.18426	0.00654242	0.546832	0.875122	Yes
VLDSFLQGY	0.93238	VLDSFLQGY	0.0053617	13.2422	HLA-A*01:01	-0.20273	-2.2707	-2.06797	0.0085513	0.546832	0.875122	Yes
FSDVISFILY	0.976173	FSDVISILY	0.0028	13.2422	HLA-A*01:01	-0.20273	-2.55284	-2.35011	0.00446568	0.546832	0.875122	Yes
VTFPEFLRY	0.922253	VTFPEFLRY	0.00574468	13.2422	HLA-A*01:01	-0.20273	-2.24073	-2.038	0.00916211	0.546832	0.875122	Yes
SSDEVNFLVY	0.990271	SSDEVNFLY	0.00110638	13.2422	HLA-A*01:01	-0.20273	-2.95609	-2.75337	0.00176455	0.546832	0.875122	Yes
ASEFGNHYLY	0.961434	ASEFGNHLY	0.00397447	13.2422	HLA-A*01:01	-0.20273	-2.40072	-2.19799	0.00633882	0.546832	0.875122	Yes
ETDEKDFYLY	0.991521	ETDEKDFLY	0.000944681	13.2422	HLA-A*01:01	-0.20273	-3.02471	-2.82199	0.00150666	0.546832	0.875122	Yes
YSDSLVQKGY	0.991274	YSDSLVQKY	0.000978723	13.2422	HLA-A*01:01	-0.20273	-3.00934	-2.80661	0.00156095	0.546832	0.875122	Yes
YSSPYPQEY	0.992398	YSSPYPQEY	0.000825532	13.2422	HLA-A*01:01	-0.20273	-3.08327	-2.88054	0.00131663	0.546832	0.875122	Yes
LIEEGGLQHLY	0.846822	LIEEGGLLY	0.00781277	13.2422	HLA-A*01:01	-0.20273	-2.1072	-1.90447	0.0124605	0.546832	0.875122	Yes
LSDIASALRY	0.985295	LSDASALRY	0.0017617	13.2422	HLA-A*01:01	-0.20273	-2.75407	-2.55134	0.00280971	0.546832	0.875122	Yes
DLDYGFLSNY	0.702328	DLDYGFLSY	0.00958298	13.2422	HLA-A*01:01	-0.20273	-2.0185	-1.81577	0.0152838	0.546832	0.875122	Yes
YLEDKVYLTGY	0.804462	YLEDKVYLY	0.00842553	13.2422	HLA-A*01:01	-0.20273	-2.0744	-1.87167	0.0134378	0.546832	0.875122	Yes
ELDDTLKY	0.771919	ELDD-TLKY	0.00882553	13.2422	HLA-A*01:01	-0.20273	-2.05426	-1.85153	0.0140757	0.546832	0.875122	Yes
PPYTVVYFPVR	1.9e-05	PPYTVVPVR	0.90063	13.2422	HLA-A*01:01	-0.20273	-0.0454537	0.157276	1.4364	0.546832	0.875122	Yes
WSEPFYQETY	0.920025	WSEPYQETY	0.00577872	13.2422	HLA-A*01:01	-0.20273	-2.23817	-2.03544	0.0092164	0.546832	0.875122	Yes
ASEAEMRLFY	0.915167	ASEAEMLFY	0.00595745	13.2422	HLA-A*01:01	-0.20273	-2.22494	-2.02221	0.00950145	0.546832	0.875122	Yes
LLDEHHISY	0.982771	LLDEHHISY	0.00211064	13.2422	HLA-A*01:01	-0.20273	-2.67559	-2.47286	0.00336623	0.546832	0.875122	Yes
SSDSVGGFRY	0.990357	SSDSGGFRY	0.00109787	13.2422	HLA-A*01:01	-0.20273	-2.95945	-2.75672	0.00175098	0.546832	0.875122	Yes
SSEQTFMYY	0.985799	SSEQTFMYY	0.00169362	13.2422	HLA-A*01:01	-0.20273	-2.77118	-2.56846	0.00270113	0.546832	0.875122	Yes
LIDYDMVHY	0.902503	LIDYDMVHY	0.00643404	13.2422	HLA-A*01:01	-0.20273	-2.19152	-1.98879	0.0102616	0.546832	0.875122	Yes
DSDLLDSQVQY	0.953798	DSDDSQVQY	0.00441702	13.2422	HLA-A*01:01	-0.20273	-2.35487	-2.15214	0.00704464	0.546832	0.875122	Yes
ITDLPIKL	0.108012	ITD-LPIKL	0.0238553	13.2422	HLA-A*01:01	-0.20273	-1.62241	-1.41969	0.0380465	0.546832	0.875122	Yes
FSDIHDFEY	0.997036	FSDIHDFEY	0.000187234	13.2422	HLA-A*01:01	-0.20273	-3.72762	-3.52489	0.000298617	0.546832	0.875122	Yes
TVDRVVLLY	0.992791	TVDRVVLLY	0.000748936	13.2422	HLA-A*01:01	-0.20273	-3.12556	-2.92283	0.00119447	0.546832	0.875122	Yes
LTEGPHLYY	0.996015	LTEGPHLYY	0.000314894	13.2422	HLA-A*01:01	-0.20273	-3.50184	-3.29911	0.000502219	0.546832	0.875122	Yes
YSFLDKMSFY	0.677649	YSFDKMSFY	0.00982128	13.2422	HLA-A*01:01	-0.20273	-2.00783	-1.8051	0.0156638	0.546832	0.875122	Yes
ISSENLLDAVY	0.340001	ISSENLLVY	0.0142809	13.2422	HLA-A*01:01	-0.20273	-1.84525	-1.64252	0.0227763	0.546832	0.875122	Yes
SVDSQILYY	0.99468	SVDSQILYY	0.000510638	13.2422	HLA-A*01:01	-0.20273	-3.29189	-3.08916	0.00081441	0.546832	0.875122	Yes
KSDVEAIFSKY	0.843714	KSDVEASKY	0.00786383	13.2422	HLA-A*01:01	-0.20273	-2.10437	-1.90164	0.0125419	0.546832	0.875122	Yes
YVDPQFLTYM	0.802582	YVDPQFLTY	0.00850213	13.2422	HLA-A*01:01	-0.20273	-2.07047	-1.86774	0.0135599	0.546832	0.875122	Yes
VTEQLDAGVRY	0.935234	VTEDAGVRY	0.00523404	13.2422	HLA-A*01:01	-0.20273	-2.28116	-2.07843	0.0083477	0.546832	0.875122	Yes
YIDSKFEDY	0.951514	YIDSKFEDY	0.00448511	13.2422	HLA-A*01:01	-0.20273	-2.34823	-2.1455	0.00715323	0.546832	0.875122	Yes
RLETELDGLRY	0.861669	RTELDGLRY	0.00756596	13.2422	HLA-A*01:01	-0.20273	-2.12114	-1.91841	0.0120668	0.546832	0.875122	Yes
ATDYTFAMY	0.992705	ATDYTFAMY	0.000765957	13.2422	HLA-A*01:01	-0.20273	-3.1158	-2.91307	0.00122161	0.546832	0.875122	Yes
FTDGDAALEF	0.781575	FTDDAALEF	0.00876596	13.2422	HLA-A*01:01	-0.20273	-2.0572	-1.85447	0.0139807	0.546832	0.875122	Yes
FLEDAIAVTRY	0.711132	FLEDAVTRY	0.00946383	13.2422	HLA-A*01:01	-0.20273	-2.02393	-1.8212	0.0150937	0.546832	0.875122	Yes
VLDIQNNLY	0.981625	VLDIQNNLY	0.00222979	13.2422	HLA-A*01:01	-0.20273	-2.65174	-2.44901	0.00355626	0.546832	0.875122	Yes
KLDQLIEFY	0.914023	KLDQLIEFY	0.00598298	13.2422	HLA-A*01:01	-0.20273	-2.22308	-2.02035	0.00954217	0.546832	0.875122	Yes
VDPLSALKY	0.177931	VDPLSALKY	0.019183	13.2422	HLA-A*01:01	-0.20273	-1.71708	-1.51435	0.0305947	0.546832	0.875122	Yes
ASDPYQVHV	0.49868	ASDPYQVHV	0.0117787	13.2422	HLA-A*01:01	-0.20273	-1.9289	-1.72617	0.0187857	0.546832	0.875122	Yes
YIDPIAMEY	0.994336	YIDPIAMEY	0.000544681	13.2422	HLA-A*01:01	-0.20273	-3.26386	-3.06113	0.000868704	0.546832	0.875122	Yes
KTELQFSDYY	0.924808	KTELQSDYY	0.00569362	13.2422	HLA-A*01:01	-0.20273	-2.24461	-2.04188	0.00908067	0.546832	0.875122	Yes
TEPPPLLVY	0.272873	TEPPPLLVY	0.0159574	13.2422	HLA-A*01:01	-0.20273	-1.79704	-1.59431	0.0254503	0.546832	0.875122	Yes
RLDAVTLLY	0.979824	RLDAVTLLY	0.00244255	13.2422	HLA-A*01:01	-0.20273	-2.61216	-2.40943	0.00389559	0.546832	0.875122	Yes
LTEFKFIWY	0.767102	LTEFKFIWY	0.00886809	13.2422	HLA-A*01:01	-0.20273	-2.05217	-1.84944	0.0141436	0.546832	0.875122	Yes
AIMELDDTLKY	0.31466	AIMDDTLKY	0.0148426	13.2422	HLA-A*01:01	-0.20273	-1.82849	-1.62576	0.0236722	0.546832	0.875122	Yes
DLEKEAPWEY	0.526289	DLEEAPWEY	0.0114894	13.2422	HLA-A*01:01	-0.20273	-1.9397	-1.73697	0.0183242	0.546832	0.875122	Yes
VVDRIYSLY	0.969601	VVDRIYSLY	0.00341277	13.2422	HLA-A*01:01	-0.20273	-2.46689	-2.26416	0.00544297	0.546832	0.875122	Yes
FSEPSFITESY	0.970846	FSEPSTESY	0.00329362	13.2422	HLA-A*01:01	-0.20273	-2.48233	-2.2796	0.00525294	0.546832	0.875122	Yes
VSDFGLSRY	0.992479	VSDFGLSRY	0.000817021	13.2422	HLA-A*01:01	-0.20273	-3.08777	-2.88504	0.00130306	0.546832	0.875122	Yes
AADLVEALY	0.970426	AADLVEALY	0.00331064	13.2422	HLA-A*01:01	-0.20273	-2.48009	-2.27736	0.00528009	0.546832	0.875122	Yes
RTDPIPIVV	0.554443	RTDPIPIVV	0.0111574	13.2422	HLA-A*01:01	-0.20273	-1.95244	-1.74971	0.0177948	0.546832	0.875122	Yes
HLDEAQRLLY	0.980826	HLDEAQLLY	0.00231489	13.2422	HLA-A*01:01	-0.20273	-2.63547	-2.43274	0.00369199	0.546832	0.875122	Yes
LLDFADVTY	0.900488	LLDFADVTY	0.00651915	13.2422	HLA-A*01:01	-0.20273	-2.18581	-1.98308	0.0103973	0.546832	0.875122	Yes
TLAVAAGLYY	0.301655	TLAAAGLYY	0.0152085	13.2422	HLA-A*01:01	-0.20273	-1.81791	-1.61518	0.0242558	0.546832	0.875122	Yes
YSDSGLFGIY	0.987218	YSDSGLFGY	0.00154043	13.2422	HLA-A*01:01	-0.20273	-2.81236	-2.60963	0.0024568	0.546832	0.875122	Yes
TADTLMGLRY	0.946285	TADTLGLRY	0.00481702	13.2422	HLA-A*01:01	-0.20273	-2.31722	-2.11449	0.0076826	0.546832	0.875122	Yes
VVDVPEFLVY	0.94234	VVDPEFLVY	0.0049617	13.2422	HLA-A*01:01	-0.20273	-2.30437	-2.10164	0.00791335	0.546832	0.875122	Yes
RVDFQGMEY	0.971681	RVDFQGMEY	0.00321702	13.2422	HLA-A*01:01	-0.20273	-2.49255	-2.28982	0.00513078	0.546832	0.875122	Yes
YVDDASWMRY	0.990249	YVDDASMRY	0.00114043	13.2422	HLA-A*01:01	-0.20273	-2.94293	-2.7402	0.00181885	0.546832	0.875122	Yes
ALDESFLGTLY	0.941557	ALDESGTLY	0.00497872	13.2422	HLA-A*01:01	-0.20273	-2.30288	-2.10015	0.00794049	0.546832	0.875122	Yes
LLDPSVFHV	0.268186	LLDPSVFHV	0.0160766	13.2422	HLA-A*01:01	-0.20273	-1.79381	-1.59108	0.0256403	0.546832	0.875122	Yes
FIEEYVTAY	0.806025	FIEEYVTAY	0.0084	13.2422	HLA-A*01:01	-0.20273	-2.07572	-1.87299	0.013397	0.546832	0.875122	Yes
LADQIFAYY	0.962733	LADQIFAYY	0.0039234	13.2422	HLA-A*01:01	-0.20273	-2.40634	-2.20361	0.00625738	0.546832	0.875122	Yes
ISEELVQKY	0.978832	ISEELVQKY	0.00258723	13.2422	HLA-A*01:01	-0.20273	-2.58716	-2.38443	0.00412634	0.546832	0.875122	Yes
HTDAVWGLAY	0.986237	HTDAVGLAY	0.00163404	13.2422	HLA-A*01:01	-0.20273	-2.78674	-2.58401	0.00260611	0.546832	0.875122	Yes
RSDVEILGY	0.968966	RSDVEILGY	0.00348085	13.2422	HLA-A*01:01	-0.20273	-2.45831	-2.25559	0.00555156	0.546832	0.875122	Yes
LSEPEEAAALY	0.944402	LSEPEAALY	0.00489362	13.2422	HLA-A*01:01	-0.20273	-2.31037	-2.10764	0.00780476	0.546832	0.875122	Yes
VVELDLLEY	0.882319	VVELDLLEY	0.00695319	13.2422	HLA-A*01:01	-0.20273	-2.15782	-1.95509	0.0110895	0.546832	0.875122	Yes
DTDRFVLLV	0.401065	DTDRFVLLV	0.0132	13.2422	HLA-A*01:01	-0.20273	-1.87943	-1.6767	0.0210525	0.546832	0.875122	Yes
GLDEVIFSY	0.917321	GLDEVIFSY	0.00587234	13.2422	HLA-A*01:01	-0.20273	-2.23119	-2.02846	0.00936571	0.546832	0.875122	Yes
HSALLALRY	0.874855	HSALLALRY	0.00721702	13.2422	HLA-A*01:01	-0.20273	-2.14164	-1.93891	0.0115103	0.546832	0.875122	Yes
LTDRLASLY	0.997175	LTDRLASLY	0.000153191	13.2422	HLA-A*01:01	-0.20273	-3.81477	-3.61204	0.000244323	0.546832	0.875122	Yes
IVDDFFIGRY	0.838189	IVDDFFIRY	0.00790638	13.2422	HLA-A*01:01	-0.20273	-2.10202	-1.89929	0.0126098	0.546832	0.875122	Yes
NIEAAKDLLY	0.674486	NIEAADLLY	0.00987234	13.2422	HLA-A*01:01	-0.20273	-2.00558	-1.80285	0.0157453	0.546832	0.875122	Yes
PLDQTPLFY	0.949983	PLDQTPLFY	0.00460426	13.2422	HLA-A*01:01	-0.20273	-2.33684	-2.13411	0.00734326	0.546832	0.875122	Yes
YLWSAIEIFRY	0.30172	YSAIEIFRY	0.0152	13.2422	HLA-A*01:01	-0.20273	-1.81816	-1.61543	0.0242423	0.546832	0.875122	Yes
NTEEFITVY	0.970028	NTEEFITVY	0.00338723	13.2422	HLA-A*01:01	-0.20273	-2.47015	-2.26743	0.00540225	0.546832	0.875122	Yes
NTDPSIVMTY	0.99504	NTDPSVMTY	0.000451064	13.2422	HLA-A*01:01	-0.20273	-3.34576	-3.14303	0.000719395	0.546832	0.875122	Yes
LTDIIAAY	0.81677	LTD-IIAAY	0.00826383	13.2422	HLA-A*01:01	-0.20273	-2.08282	-1.88009	0.0131799	0.546832	0.875122	Yes
VMDTLGIPY	0.756886	VMDTLGIPY	0.00899574	13.2422	HLA-A*01:01	-0.20273	-2.04596	-1.84323	0.0143472	0.546832	0.875122	Yes
LIDVGTGYY	0.948122	LIDVGTGYY	0.00468085	13.2422	HLA-A*01:01	-0.20273	-2.32968	-2.12695	0.00746542	0.546832	0.875122	Yes
FIDLNYMVY	0.884512	FIDLNYMVY	0.00689362	13.2422	HLA-A*01:01	-0.20273	-2.16155	-1.95882	0.0109945	0.546832	0.875122	Yes
TETGTPYMLY	0.524846	TTGTPYMLY	0.0115064	13.2422	HLA-A*01:01	-0.20273	-1.93906	-1.73633	0.0183514	0.546832	0.875122	Yes
GLDEPLLK	0.010961	GLDE-PLLK	0.0651234	13.2422	HLA-A*01:01	-0.20273	-1.18626	-0.983533	0.103864	0.546832	0.875122	Yes
YTDKVVIGM	0.643817	YTDKVVIGM	0.0102128	13.2422	HLA-A*01:01	-0.20273	-1.99086	-1.78813	0.0162882	0.546832	0.875122	Yes
FTAEFSSRY	0.969211	FTAEFSSRY	0.00342128	13.2422	HLA-A*01:01	-0.20273	-2.46581	-2.26308	0.00545654	0.546832	0.875122	Yes
YTDIVGLLL	0.729035	YTDIVGLLL	0.00929362	13.2422	HLA-A*01:01	-0.20273	-2.03182	-1.82909	0.0148223	0.546832	0.875122	Yes
LLEVDATSKY	0.809244	LLEDATSKY	0.00835745	13.2422	HLA-A*01:01	-0.20273	-2.07793	-1.8752	0.0133292	0.546832	0.875122	Yes
LTDIGVLY	0.957011	LTD-IGVLY	0.00426383	13.2422	HLA-A*01:01	-0.20273	-2.3702	-2.16747	0.00680032	0.546832	0.875122	Yes
LLDDTGLAY	0.988644	LLDDTGLAY	0.0013617	13.2422	HLA-A*01:01	-0.20273	-2.86592	-2.66319	0.00217176	0.546832	0.875122	Yes
HTDVGLLEY	0.998031	HTDVGLLEY	7.65957e-05	13.2422	HLA-A*01:01	-0.20273	-4.1158	-3.91307	0.000122161	0.546832	0.875122	Yes
GSDPVFRFY	0.980197	GSDPVFRFY	0.00235745	13.2422	HLA-A*01:01	-0.20273	-2.62756	-2.42483	0.00375986	0.546832	0.875122	Yes
VADVHQYFY	0.983057	VADVHQYFY	0.00208511	13.2422	HLA-A*01:01	-0.20273	-2.68087	-2.47814	0.00332551	0.546832	0.875122	Yes
SSESLNHLLY	0.983075	SSESNHLLY	0.00205957	13.2422	HLA-A*01:01	-0.20273	-2.68622	-2.48349	0.00328479	0.546832	0.875122	Yes
FSEEQLNRY	0.98634	FSEEQLNRY	0.00162553	13.2422	HLA-A*01:01	-0.20273	-2.789	-2.58627	0.00259254	0.546832	0.875122	Yes
RTELAIKLLEY	0.687923	RTELAILEY	0.00971915	13.2422	HLA-A*01:01	-0.20273	-2.01237	-1.80964	0.0155009	0.546832	0.875122	Yes
LLDSDEPLVY	0.9494	LLDDEPLVY	0.0046383	13.2422	HLA-A*01:01	-0.20273	-2.33364	-2.13091	0.00739755	0.546832	0.875122	Yes
FMDPGPEGKLY	0.967168	FMDPGPELY	0.00357447	13.2422	HLA-A*01:01	-0.20273	-2.44679	-2.24406	0.00570087	0.546832	0.875122	Yes
STDTSLKIFY	0.987357	STDTSKIFY	0.0015234	13.2422	HLA-A*01:01	-0.20273	-2.81718	-2.61446	0.00242966	0.546832	0.875122	Yes
FLDNPDAFYY	0.966721	FLDPDAFYY	0.00360851	13.2422	HLA-A*01:01	-0.20273	-2.44267	-2.23994	0.00575516	0.546832	0.875122	Yes
LSEWQKELY	0.927065	LSEWQKELY	0.00554894	13.2422	HLA-A*01:01	-0.20273	-2.25579	-2.05306	0.00884992	0.546832	0.875122	Yes
VIDWHNYGY	0.861894	VIDWHNYGY	0.00754894	13.2422	HLA-A*01:01	-0.20273	-2.12211	-1.91938	0.0120397	0.546832	0.875122	Yes
ELERLTSLY	0.877158	ELERLTSLY	0.00711489	13.2422	HLA-A*01:01	-0.20273	-2.14783	-1.9451	0.0113474	0.546832	0.875122	Yes
NIDYPVLY	0.598264	NID-YPVLY	0.0107574	13.2422	HLA-A*01:01	-0.20273	-1.96829	-1.76556	0.0171569	0.546832	0.875122	Yes
DVDHGNFFTY	0.871225	DVDHGNFFY	0.00728511	13.2422	HLA-A*01:01	-0.20273	-2.13756	-1.93483	0.0116189	0.546832	0.875122	Yes
SSELFTLTY	0.984306	SSELFTLTY	0.00188085	13.2422	HLA-A*01:01	-0.20273	-2.72565	-2.52292	0.00299974	0.546832	0.875122	Yes
VIDVNKVVEY	0.727093	VIDNKVVEY	0.00931064	13.2422	HLA-A*01:01	-0.20273	-2.03102	-1.82829	0.0148494	0.546832	0.875122	Yes
MVDFAMDVY	0.895415	MVDFAMDVY	0.00664681	13.2422	HLA-A*01:01	-0.20273	-2.17739	-1.97466	0.0106009	0.546832	0.875122	Yes
MIDVTKSYY	0.94911	MIDVTKSYY	0.00464681	13.2422	HLA-A*01:01	-0.20273	-2.33285	-2.13012	0.00741113	0.546832	0.875122	Yes
VLDNPSPFY	0.973753	VLDNPSPFY	0.00304681	13.2422	HLA-A*01:01	-0.20273	-2.51615	-2.31343	0.00485931	0.546832	0.875122	Yes
ISEPWTQRSFY	0.89445	ISEPWTQFY	0.00668085	13.2422	HLA-A*01:01	-0.20273	-2.17517	-1.97244	0.0106552	0.546832	0.875122	Yes
FVEVGRVAY	0.692753	FVEVGRVAY	0.00966809	13.2422	HLA-A*01:01	-0.20273	-2.01466	-1.81193	0.0154195	0.546832	0.875122	Yes
ILDVLKQGY	0.856068	ILDVLKQGY	0.00764255	13.2422	HLA-A*01:01	-0.20273	-2.11676	-1.91403	0.012189	0.546832	0.875122	Yes
FADFDGVLY	0.983235	FADFDGVLY	0.00203404	13.2422	HLA-A*01:01	-0.20273	-2.69164	-2.48891	0.00324406	0.546832	0.875122	Yes
TDINLPYL	0.011671	-TDINLPYL	0.0630979	13.2422	HLA-A*01:01	-0.20273	-1.19999	-0.997256	0.100634	0.546832	0.875122	Yes
HSDPSILGY	0.998227	HSDPSILGY	5.10638e-05	13.2422	HLA-A*01:01	-0.20273	-4.29189	-4.08916	8.1441e-05	0.546832	0.875122	Yes
TLDPQTGLFY	0.990125	TLDPQTLFY	0.00114894	13.2422	HLA-A*01:01	-0.20273	-2.9397	-2.73697	0.00183242	0.546832	0.875122	Yes
MAELGPLNKY	0.832176	MAELGPLKY	0.00798298	13.2422	HLA-A*01:01	-0.20273	-2.09784	-1.89511	0.0127319	0.546832	0.875122	Yes
LVDAFVEHRY	0.887331	LVDAVEHRY	0.00685957	13.2422	HLA-A*01:01	-0.20273	-2.1637	-1.96097	0.0109402	0.546832	0.875122	Yes
PSDIFMVMEY	0.706526	PSDFMVMEY	0.00953191	13.2422	HLA-A*01:01	-0.20273	-2.02082	-1.81809	0.0152023	0.546832	0.875122	Yes
YMDDYIFTY	0.990387	YMDDYIFTY	0.00108936	13.2422	HLA-A*01:01	-0.20273	-2.96283	-2.7601	0.00173741	0.546832	0.875122	Yes
LVDHGDISFY	0.933693	LVDHGISFY	0.00529362	13.2422	HLA-A*01:01	-0.20273	-2.27625	-2.07352	0.00844271	0.546832	0.875122	Yes
YSQELSLLY	0.989696	YSQELSLLY	0.00121702	13.2422	HLA-A*01:01	-0.20273	-2.9147	-2.71197	0.00194101	0.546832	0.875122	Yes
YLEETSIRY	0.96913	YLEETSIRY	0.00344681	13.2422	HLA-A*01:01	-0.20273	-2.46258	-2.25985	0.00549726	0.546832	0.875122	Yes
YTSNLAYSFY	0.818762	YTSNLASFY	0.00820426	13.2422	HLA-A*01:01	-0.20273	-2.08596	-1.88323	0.0130848	0.546832	0.875122	Yes
NLDFLDLGY	0.864228	NLDFLDLGY	0.00751489	13.2422	HLA-A*01:01	-0.20273	-2.12408	-1.92135	0.0119854	0.546832	0.875122	Yes
PTDYADIMMGY	0.828276	PTDDIMMGY	0.00805106	13.2422	HLA-A*01:01	-0.20273	-2.09415	-1.89142	0.0128405	0.546832	0.875122	Yes
YTDIPKIIY	0.994919	YTDIPKIIY	0.000502128	13.2422	HLA-A*01:01	-0.20273	-3.29919	-3.09646	0.000800836	0.546832	0.875122	Yes
TVEDPVTVEY	0.969058	TVDPVTVEY	0.00346383	13.2422	HLA-A*01:01	-0.20273	-2.46044	-2.25771	0.00552441	0.546832	0.875122	Yes
MLEAGILDTY	0.672279	MLEAGILTY	0.00989787	13.2422	HLA-A*01:01	-0.20273	-2.00446	-1.80173	0.015786	0.546832	0.875122	Yes
SSDTADFRDLY	0.977089	SSDTADFLY	0.00268936	13.2422	HLA-A*01:01	-0.20273	-2.57035	-2.36762	0.00428922	0.546832	0.875122	Yes
FSDNDKLYLY	0.994948	FSDNDKLLY	0.000485106	13.2422	HLA-A*01:01	-0.20273	-3.31416	-3.11143	0.000773689	0.546832	0.875122	Yes
TDIQGALSAY	0.141052	TDIQGALSY	0.0213277	13.2422	HLA-A*01:01	-0.20273	-1.67106	-1.46833	0.0340152	0.546832	0.875122	Yes
LLYESPERY	0.530154	LLYESPERY	0.0114213	13.2422	HLA-A*01:01	-0.20273	-1.94229	-1.73956	0.0182156	0.546832	0.875122	Yes
FTELAILY	0.79863	FTE-LAILY	0.00857021	13.2422	HLA-A*01:01	-0.20273	-2.06701	-1.86428	0.0136685	0.546832	0.875122	Yes
ALDDFTICY	0.966242	ALDDFTICY	0.00365106	13.2422	HLA-A*01:01	-0.20273	-2.43758	-2.23485	0.00582303	0.546832	0.875122	Yes
YIDDVFHAL	0.401561	YIDDVFHAL	0.0131915	13.2422	HLA-A*01:01	-0.20273	-1.87971	-1.67698	0.0210389	0.546832	0.875122	Yes
NLDIERPTY	0.817041	NLDIERPTY	0.00824681	13.2422	HLA-A*01:01	-0.20273	-2.08371	-1.88098	0.0131527	0.546832	0.875122	Yes
GMDEVYNLFY	0.841447	GMDEVNLFY	0.00787234	13.2422	HLA-A*01:01	-0.20273	-2.1039	-1.90117	0.0125555	0.546832	0.875122	Yes
ETELDGLRY	0.986499	ETELDGLRY	0.00161702	13.2422	HLA-A*01:01	-0.20273	-2.79128	-2.58855	0.00257896	0.546832	0.875122	Yes
FTEIKVGVAY	0.919461	FTEKVGVAY	0.00582128	13.2422	HLA-A*01:01	-0.20273	-2.23498	-2.03225	0.00928427	0.546832	0.875122	Yes
ALDAAVLAY	0.944512	ALDAAVLAY	0.00488511	13.2422	HLA-A*01:01	-0.20273	-2.31113	-2.1084	0.00779119	0.546832	0.875122	Yes
KLDDLHTLY	0.985378	KLDDLHTLY	0.00175319	13.2422	HLA-A*01:01	-0.20273	-2.75617	-2.55344	0.00279614	0.546832	0.875122	Yes
SENPWDNKAVY	0.070855	SENPWDNKY	0.0284426	13.2422	HLA-A*01:01	-0.20273	-1.54603	-1.3433	0.0453626	0.546832	0.875122	Yes
GLDDKLLHY	0.957505	GLDDKLLHY	0.00422128	13.2422	HLA-A*01:01	-0.20273	-2.37456	-2.17183	0.00673245	0.546832	0.875122	Yes
LLDTPVKTQY	0.929276	LLDPVKTQY	0.00548085	13.2422	HLA-A*01:01	-0.20273	-2.26115	-2.05842	0.00874133	0.546832	0.875122	Yes
KSDGSFIGY	0.963777	KSDGSFIGY	0.00386383	13.2422	HLA-A*01:01	-0.20273	-2.41298	-2.21025	0.00616237	0.546832	0.875122	Yes
AMDVYKNLY	0.894017	AMDVYKNLY	0.00671489	13.2422	HLA-A*01:01	-0.20273	-2.17296	-1.97023	0.0107095	0.546832	0.875122	Yes
TADHNLLLY	0.995437	TADHNLLLY	0.000391489	13.2422	HLA-A*01:01	-0.20273	-3.40728	-3.20455	0.000624381	0.546832	0.875122	Yes
ASEFPGAQHY	0.951141	ASEPGAQHY	0.00452766	13.2422	HLA-A*01:01	-0.20273	-2.34413	-2.1414	0.0072211	0.546832	0.875122	Yes
YTEEFDFKEY	0.973629	YTEEFDFKY	0.00307234	13.2422	HLA-A*01:01	-0.20273	-2.51253	-2.3098	0.00490003	0.546832	0.875122	Yes
ISDSYFPRY	0.986667	ISDSYFPRY	0.0016	13.2422	HLA-A*01:01	-0.20273	-2.79588	-2.59315	0.00255182	0.546832	0.875122	Yes
FTDTSIILF	0.929954	FTDTSIILF	0.00547234	13.2422	HLA-A*01:01	-0.20273	-2.26183	-2.0591	0.00872776	0.546832	0.875122	Yes
GTEIAASLLY	0.930601	GTEAASLLY	0.00545532	13.2422	HLA-A*01:01	-0.20273	-2.26318	-2.06045	0.00870061	0.546832	0.875122	Yes
ATEFIMNEY	0.972462	ATEFIMNEY	0.00314043	13.2422	HLA-A*01:01	-0.20273	-2.50301	-2.30028	0.00500862	0.546832	0.875122	Yes
ELDGFGLYLY	0.926491	ELDGFGLLY	0.00557447	13.2422	HLA-A*01:01	-0.20273	-2.2538	-2.05107	0.00889064	0.546832	0.875122	Yes
ITDIVNKY	0.916026	ITD-IVNKY	0.0059234	13.2422	HLA-A*01:01	-0.20273	-2.22743	-2.0247	0.00944715	0.546832	0.875122	Yes
FIDIFTSNTY	0.857019	FIDITSNTY	0.00763404	13.2422	HLA-A*01:01	-0.20273	-2.11725	-1.91452	0.0121754	0.546832	0.875122	Yes
TSDELQFGY	0.993646	TSDELQFGY	0.000621277	13.2422	HLA-A*01:01	-0.20273	-3.20672	-3.00399	0.000990865	0.546832	0.875122	Yes
MTHNLLLNY	0.672067	MTHNLLLNY	0.0099234	13.2422	HLA-A*01:01	-0.20273	-2.00334	-1.80061	0.0158267	0.546832	0.875122	Yes
SADQVALVY	0.983232	SADQVALVY	0.00204255	13.2422	HLA-A*01:01	-0.20273	-2.68983	-2.4871	0.00325764	0.546832	0.875122	Yes
FVDDQQTFF	0.799154	FVDDQQTFF	0.0085617	13.2422	HLA-A*01:01	-0.20273	-2.06744	-1.86471	0.0136549	0.546832	0.875122	Yes
NTDLVFGQY	0.988243	NTDLVFGQY	0.00141277	13.2422	HLA-A*01:01	-0.20273	-2.84993	-2.6472	0.0022532	0.546832	0.875122	Yes
NSDWHLVNY	0.971888	NSDWHLVNY	0.00319149	13.2422	HLA-A*01:01	-0.20273	-2.49601	-2.29328	0.00509006	0.546832	0.875122	Yes
LLDELLQKGY	0.844667	LLDELLQKY	0.0078383	13.2422	HLA-A*01:01	-0.20273	-2.10578	-1.90305	0.0125012	0.546832	0.875122	Yes
LSDHSIRSF	0.401565	LSDHSIRSF	0.013183	13.2422	HLA-A*01:01	-0.20273	-1.87999	-1.67726	0.0210253	0.546832	0.875122	Yes
NSESGYILFY	0.964416	NSESGILFY	0.00380426	13.2422	HLA-A*01:01	-0.20273	-2.41973	-2.217	0.00606735	0.546832	0.875122	Yes
ETTFLVDKY	0.68373	ETTFLVDKY	0.00977021	13.2422	HLA-A*01:01	-0.20273	-2.0101	-1.80737	0.0155824	0.546832	0.875122	Yes
RPPGFSPFR	0.002177	RPPGFSPFR	0.161609	13.2422	HLA-A*01:01	-0.20273	-0.791536	-0.588806	0.257747	0.546832	0.875122	Yes
LLDAVLIDY	0.81555	LLDAVLIDY	0.00829787	13.2422	HLA-A*01:01	-0.20273	-2.08103	-1.8783	0.0132342	0.546832	0.875122	Yes
TDDLTTWLY	0.777389	TDDLTTWLY	0.00877447	13.2422	HLA-A*01:01	-0.20273	-2.05678	-1.85405	0.0139943	0.546832	0.875122	Yes
GSDEPAFMYY	0.984926	GSDEPAMYY	0.00180426	13.2422	HLA-A*01:01	-0.20273	-2.7437	-2.54097	0.00287758	0.546832	0.875122	Yes
VIDSAELQAY	0.91387	VIDSAELQY	0.006	13.2422	HLA-A*01:01	-0.20273	-2.22185	-2.01912	0.00956931	0.546832	0.875122	Yes
FLWPEAFLY	0.704453	FLWPEAFLY	0.00955745	13.2422	HLA-A*01:01	-0.20273	-2.01966	-1.81693	0.015243	0.546832	0.875122	Yes
FMDSVIFTLY	0.892872	FMDSVITLY	0.00674894	13.2422	HLA-A*01:01	-0.20273	-2.17076	-1.96804	0.0107638	0.546832	0.875122	Yes
FSDNIEFY	0.920073	FSDNI-EFY	0.00577021	13.2422	HLA-A*01:01	-0.20273	-2.23881	-2.03608	0.00920283	0.546832	0.875122	Yes
RTEPFQDGY	0.96524	RTEPFQDGY	0.00369362	13.2422	HLA-A*01:01	-0.20273	-2.43255	-2.22982	0.0058909	0.546832	0.875122	Yes
YTEDSPGLKV	0.475366	YTDSPGLKV	0.0120596	13.2422	HLA-A*01:01	-0.20273	-1.91867	-1.71594	0.0192336	0.546832	0.875122	Yes
IEEAGWSY	0.092876	-IEEAGWSY	0.0254638	13.2422	HLA-A*01:01	-0.20273	-1.59408	-1.39135	0.0406119	0.546832	0.875122	Yes
FVDDYTVRV	0.479469	FVDDYTVRV	0.012	13.2422	HLA-A*01:01	-0.20273	-1.92082	-1.71809	0.0191386	0.546832	0.875122	Yes
ELDPMAMTQKY	0.903064	ELDPMTQKY	0.00637447	13.2422	HLA-A*01:01	-0.20273	-2.19556	-1.99283	0.0101665	0.546832	0.875122	Yes
ALDGGFQMHY	0.926227	ALDGGQMHY	0.00558298	13.2422	HLA-A*01:01	-0.20273	-2.25313	-2.0504	0.00890421	0.546832	0.875122	Yes
LSEEGLLVY	0.979543	LSEEGLLVY	0.00248511	13.2422	HLA-A*01:01	-0.20273	-2.60466	-2.40193	0.00396346	0.546832	0.875122	Yes
IVDHIHFQY	0.979106	IVDHIHFQY	0.00254468	13.2422	HLA-A*01:01	-0.20273	-2.59437	-2.39164	0.00405847	0.546832	0.875122	Yes
LDAELLRY	0.315117	-LDAELLRY	0.014817	13.2422	HLA-A*01:01	-0.20273	-1.82924	-1.62651	0.0236315	0.546832	0.875122	Yes
TTSHLMGMFY	0.668923	TTSHLGMFY	0.00997447	13.2422	HLA-A*01:01	-0.20273	-2.00111	-1.79838	0.0159081	0.546832	0.875122	Yes
TSDHFETIMKY	0.979006	TSDETIMKY	0.00257021	13.2422	HLA-A*01:01	-0.20273	-2.59003	-2.3873	0.00409919	0.546832	0.875122	Yes
FTENDKEYQEY	0.97695	FTDKEYQEY	0.00271489	13.2422	HLA-A*01:01	-0.20273	-2.56625	-2.36352	0.00432994	0.546832	0.875122	Yes
LTDFIQKY	0.925276	LTD-FIQKY	0.00565957	13.2422	HLA-A*01:01	-0.20273	-2.24722	-2.04449	0.00902637	0.546832	0.875122	Yes
MSMVANLLY	0.803851	MSMVANLLY	0.00846809	13.2422	HLA-A*01:01	-0.20273	-2.07221	-1.86949	0.0135056	0.546832	0.875122	Yes
LTEPTGLLY	0.998002	LTEPTGLLY	8.51064e-05	13.2422	HLA-A*01:01	-0.20273	-4.07004	-3.86731	0.000135735	0.546832	0.875122	Yes
VSDYLRQSY	0.98107	VSDYLRQSY	0.00228085	13.2422	HLA-A*01:01	-0.20273	-2.6419	-2.43917	0.0036377	0.546832	0.875122	Yes
FMEKETPLRY	0.912391	FMEETPLRY	0.0060766	13.2422	HLA-A*01:01	-0.20273	-2.21634	-2.01361	0.00969147	0.546832	0.875122	Yes
FSENTLQFY	0.989508	FSENTLQFY	0.00125957	13.2422	HLA-A*01:01	-0.20273	-2.89978	-2.69705	0.00200888	0.546832	0.875122	Yes
RIDTRNELESY	0.613773	RIDTRNELY	0.0105532	13.2422	HLA-A*01:01	-0.20273	-1.97662	-1.77389	0.0168311	0.546832	0.875122	Yes
RVDQSLLLY	0.985574	RVDQSLLLY	0.00171915	13.2422	HLA-A*01:01	-0.20273	-2.76469	-2.56196	0.00274185	0.546832	0.875122	Yes
LLDPSITLGQY	0.95397	LLDPSITLY	0.00440851	13.2422	HLA-A*01:01	-0.20273	-2.35571	-2.15298	0.00703107	0.546832	0.875122	Yes
FVETESVRY	0.955397	FVETESVRY	0.0043234	13.2422	HLA-A*01:01	-0.20273	-2.36417	-2.16144	0.00689533	0.546832	0.875122	Yes
RLDSLTTLY	0.975695	RLDSLTTLY	0.00283404	13.2422	HLA-A*01:01	-0.20273	-2.54759	-2.34486	0.00451997	0.546832	0.875122	Yes
IIDYLTDHY	0.944825	IIDYLTDHY	0.00486809	13.2422	HLA-A*01:01	-0.20273	-2.31264	-2.10991	0.00776404	0.546832	0.875122	Yes
NVDTESALLY	0.979298	NVDESALLY	0.00252766	13.2422	HLA-A*01:01	-0.20273	-2.59728	-2.39455	0.00403133	0.546832	0.875122	Yes
LIDPDLTQY	0.97935	LIDPDLTQY	0.00250213	13.2422	HLA-A*01:01	-0.20273	-2.60169	-2.39896	0.00399061	0.546832	0.875122	Yes
LSDHLINQGY	0.964432	LSDHLINQY	0.00379574	13.2422	HLA-A*01:01	-0.20273	-2.4207	-2.21797	0.00605378	0.546832	0.875122	Yes
RTDGILALY	0.992699	RTDGILALY	0.000782979	13.2422	HLA-A*01:01	-0.20273	-3.10625	-2.90352	0.00124876	0.546832	0.875122	Yes
YADPVNAHY	0.994081	YADPVNAHY	0.000570213	13.2422	HLA-A*01:01	-0.20273	-3.24396	-3.04123	0.000909424	0.546832	0.875122	Yes
RADQELLMY	0.968535	RADQELLMY	0.00350638	13.2422	HLA-A*01:01	-0.20273	-2.45514	-2.25241	0.00559228	0.546832	0.875122	Yes
RVDPNGFFLY	0.967276	RVDPNGFLY	0.00356596	13.2422	HLA-A*01:01	-0.20273	-2.44782	-2.24509	0.00568729	0.546832	0.875122	Yes
LTDNVMITV	0.295008	LTDNVMITV	0.0153532	13.2422	HLA-A*01:01	-0.20273	-1.8138	-1.61107	0.0244866	0.546832	0.875122	Yes
KIDALQLEY	0.952458	KIDALQLEY	0.00445106	13.2422	HLA-A*01:01	-0.20273	-2.35154	-2.14881	0.00709894	0.546832	0.875122	Yes
LTDGVSQIHY	0.993396	LTDGVSQHY	0.00066383	13.2422	HLA-A*01:01	-0.20273	-3.17794	-2.97521	0.00105873	0.546832	0.875122	Yes
LTALGKLLY	0.917547	LTALGKLLY	0.00586383	13.2422	HLA-A*01:01	-0.20273	-2.23182	-2.02909	0.00935214	0.546832	0.875122	Yes
YTELEAIMY	0.99254	YTELEAIMY	0.000808511	13.2422	HLA-A*01:01	-0.20273	-3.09231	-2.88958	0.00128948	0.546832	0.875122	Yes
FLDLVNYVY	0.912757	FLDLVNYVY	0.00605106	13.2422	HLA-A*01:01	-0.20273	-2.21817	-2.01544	0.00965075	0.546832	0.875122	Yes
LSEAFHEEY	0.964074	LSEAFHEEY	0.00382128	13.2422	HLA-A*01:01	-0.20273	-2.41779	-2.21506	0.0060945	0.546832	0.875122	Yes
HIDCGSLLGY	0.861028	HIDCGSLLY	0.00757447	13.2422	HLA-A*01:01	-0.20273	-2.12065	-1.91792	0.0120804	0.546832	0.875122	Yes
VTDSGPTFNYL	0.728783	VTDSGPTFY	0.00930213	13.2422	HLA-A*01:01	-0.20273	-2.03142	-1.82869	0.0148358	0.546832	0.875122	Yes
VMDVKPVDY	0.852324	VMDVKPVDY	0.00771915	13.2422	HLA-A*01:01	-0.20273	-2.11243	-1.9097	0.0123112	0.546832	0.875122	Yes
ASAITGYLSY	0.660077	ASAITGYLY	0.0100596	13.2422	HLA-A*01:01	-0.20273	-1.99742	-1.79469	0.0160439	0.546832	0.875122	Yes
LVDSKGFDEY	0.943422	LVDSKGFEY	0.00491064	13.2422	HLA-A*01:01	-0.20273	-2.30886	-2.10613	0.00783191	0.546832	0.875122	Yes
WLESVRLEY	0.843856	WLESVRLEY	0.00785532	13.2422	HLA-A*01:01	-0.20273	-2.10484	-1.90211	0.0125283	0.546832	0.875122	Yes
SVDSNLLSDY	0.905532	SVDSNLLSY	0.00628085	13.2422	HLA-A*01:01	-0.20273	-2.20198	-1.99925	0.0100172	0.546832	0.875122	Yes
LTDHTVTFLQY	0.982248	LTDHTVLQY	0.00214468	13.2422	HLA-A*01:01	-0.20273	-2.66864	-2.46591	0.00342052	0.546832	0.875122	Yes
YVDDASWMRY	0.990249	YVDDASMRY	0.00113191	13.2422	HLA-A*01:01	-0.20273	-2.94619	-2.74346	0.00180527	0.546832	0.875122	Yes
LSDEHVQFLVY	0.977486	LSDEHVQFY	0.00265532	13.2422	HLA-A*01:01	-0.20273	-2.57588	-2.37315	0.00423493	0.546832	0.875122	Yes
TENLGVVYY	0.198899	TENLGVVYY	0.0181532	13.2422	HLA-A*01:01	-0.20273	-1.74105	-1.53832	0.0289523	0.546832	0.875122	Yes
FLSFPTTKTY	0.503983	FSFPTTKTY	0.0117277	13.2422	HLA-A*01:01	-0.20273	-1.93079	-1.72806	0.0187043	0.546832	0.875122	Yes
FVDPAQITM	0.608703	FVDPAQITM	0.0106128	13.2422	HLA-A*01:01	-0.20273	-1.97417	-1.77144	0.0169261	0.546832	0.875122	Yes
ATDPNILSL	0.745521	ATDPNILSL	0.00910638	13.2422	HLA-A*01:01	-0.20273	-2.04065	-1.83792	0.0145236	0.546832	0.875122	Yes
AVDPGLLGY	0.984781	AVDPGLLGY	0.00182128	13.2422	HLA-A*01:01	-0.20273	-2.73962	-2.53689	0.00290473	0.546832	0.875122	Yes
SDYFRALY	0.352236	-SDYFRALY	0.0139915	13.2422	HLA-A*01:01	-0.20273	-1.85414	-1.65141	0.0223148	0.546832	0.875122	Yes
WTDLALQY	0.906933	WTD-LALQY	0.00622128	13.2422	HLA-A*01:01	-0.20273	-2.20612	-2.00339	0.00992222	0.546832	0.875122	Yes
LIDPNTLQV	0.447114	LIDPNTLQV	0.0125277	13.2422	HLA-A*01:01	-0.20273	-1.90213	-1.6994	0.0199802	0.546832	0.875122	Yes
YVPEHWEYY	0.677345	YVPEHWEYY	0.00984681	13.2422	HLA-A*01:01	-0.20273	-2.0067	-1.80398	0.0157045	0.546832	0.875122	Yes
KLDTLCDLY	0.816645	KLDTLCDLY	0.00827234	13.2422	HLA-A*01:01	-0.20273	-2.08237	-1.87964	0.0131934	0.546832	0.875122	Yes
YADTFGDINY	0.937629	YADTGDINY	0.00515745	13.2422	HLA-A*01:01	-0.20273	-2.28757	-2.08484	0.00822554	0.546832	0.875122	Yes
YTDATPLRV	0.880821	YTDATPLRV	0.00701277	13.2422	HLA-A*01:01	-0.20273	-2.15411	-1.95138	0.0111846	0.546832	0.875122	Yes
YIDAQFENY	0.96478	YIDAQFENY	0.0037617	13.2422	HLA-A*01:01	-0.20273	-2.42462	-2.22189	0.00599948	0.546832	0.875122	Yes
AIDHNQMFQY	0.897094	AIDHNQMQY	0.00657872	13.2422	HLA-A*01:01	-0.20273	-2.18186	-1.97913	0.0104923	0.546832	0.875122	Yes
TIDIGVKY	0.572314	TID-IGVKY	0.0109702	13.2422	HLA-A*01:01	-0.20273	-1.95978	-1.75706	0.0174962	0.546832	0.875122	Yes
TTDGYLLRL	0.570886	TTDGYLLRL	0.0109872	13.2422	HLA-A*01:01	-0.20273	-1.95911	-1.75638	0.0175234	0.546832	0.875122	Yes
TSDVPGKLIY	0.987717	TSDPGKLIY	0.00148085	13.2422	HLA-A*01:01	-0.20273	-2.82949	-2.62676	0.00236179	0.546832	0.875122	Yes
FTDNFSFNTY	0.993877	FTDNSFNTY	0.000595745	13.2422	HLA-A*01:01	-0.20273	-3.22494	-3.02221	0.000950145	0.546832	0.875122	Yes
ALDENGNLWY	0.925906	ALDENGNLY	0.00561702	13.2422	HLA-A*01:01	-0.20273	-2.25049	-2.04776	0.00895851	0.546832	0.875122	Yes
MTDEWFSEY	0.996984	MTDEWFSEY	0.000204255	13.2422	HLA-A*01:01	-0.20273	-3.68983	-3.4871	0.000325764	0.546832	0.875122	Yes
TTSHLMGMFY	0.668923	TTSHLGMFY	0.00994894	13.2422	HLA-A*01:01	-0.20273	-2.00222	-1.79949	0.0158674	0.546832	0.875122	Yes
KLDLLEQEY	0.905922	KLDLLEQEY	0.00627234	13.2422	HLA-A*01:01	-0.20273	-2.20257	-1.99984	0.0100037	0.546832	0.875122	Yes
LSDTKYLEMIY	0.905235	LSDTKYLEY	0.00631489	13.2422	HLA-A*01:01	-0.20273	-2.19963	-1.9969	0.0100715	0.546832	0.875122	Yes
GSDPLGLIAY	0.97009	GSDPLGLAY	0.00337021	13.2422	HLA-A*01:01	-0.20273	-2.47234	-2.26961	0.0053751	0.546832	0.875122	Yes
MVDFAMDVY	0.895415	MVDFAMDVY	0.00662128	13.2422	HLA-A*01:01	-0.20273	-2.17906	-1.97633	0.0105602	0.546832	0.875122	Yes
ELDPAVMDQFY	0.940051	ELDPADQFY	0.00508085	13.2422	HLA-A*01:01	-0.20273	-2.29406	-2.09133	0.00810338	0.546832	0.875122	Yes
FMEKETPLRY	0.912391	FMEETPLRY	0.00606809	13.2422	HLA-A*01:01	-0.20273	-2.21695	-2.01422	0.0096779	0.546832	0.875122	Yes
FTEEDVKFY	0.976791	FTEEDVKFY	0.0027234	13.2422	HLA-A*01:01	-0.20273	-2.56489	-2.36216	0.00434352	0.546832	0.875122	Yes
LTDYDIRFYMY	0.896411	LTDYDIYMY	0.00658723	13.2422	HLA-A*01:01	-0.20273	-2.1813	-1.97857	0.0105059	0.546832	0.875122	Yes
VVEQGPSFAFY	0.679437	VVEQGPSFY	0.00981277	13.2422	HLA-A*01:01	-0.20273	-2.00821	-1.80548	0.0156502	0.546832	0.875122	Yes
YLDGTLAIY	0.954004	YLDGTLAIY	0.0044	13.2422	HLA-A*01:01	-0.20273	-2.35655	-2.15382	0.0070175	0.546832	0.875122	Yes
YLDFINHY	0.762436	YLD-FINHY	0.00892766	13.2422	HLA-A*01:01	-0.20273	-2.04926	-1.84653	0.0142386	0.546832	0.875122	Yes
YSETLLSYFY	0.938608	YSETLSYFY	0.00514043	13.2422	HLA-A*01:01	-0.20273	-2.289	-2.08627	0.00819839	0.546832	0.875122	Yes
YTDCIPQLM	0.791003	YTDCIPQLM	0.00870638	13.2422	HLA-A*01:01	-0.20273	-2.06016	-1.85743	0.0138857	0.546832	0.875122	Yes
VVDGFNVLY	0.978428	VVDGFNVLY	0.00261277	13.2422	HLA-A*01:01	-0.20273	-2.5829	-2.38017	0.00416706	0.546832	0.875122	Yes
ASAVIGLLY	0.880037	ASAVIGLLY	0.00702128	13.2422	HLA-A*01:01	-0.20273	-2.15358	-1.95085	0.0111981	0.546832	0.875122	Yes
SVEESVLLY	0.981188	SVEESVLLY	0.00226383	13.2422	HLA-A*01:01	-0.20273	-2.64516	-2.44243	0.00361055	0.546832	0.875122	Yes
LSDIDSRYI	0.067864	LSDIDSRYI	0.0290128	13.2422	HLA-A*01:01	-0.20273	-1.53741	-1.33468	0.046272	0.546832	0.875122	Yes
TTEETLTMLY	0.989817	TTEETTMLY	0.00118298	13.2422	HLA-A*01:01	-0.20273	-2.92702	-2.72429	0.00188672	0.546832	0.875122	Yes
GTELLSLVY	0.932392	GTELLSLVY	0.00535319	13.2422	HLA-A*01:01	-0.20273	-2.27139	-2.06866	0.00853773	0.546832	0.875122	Yes
TTEIETLLL	0.35392	TTEIETLLL	0.0139234	13.2422	HLA-A*01:01	-0.20273	-1.85625	-1.65353	0.0222062	0.546832	0.875122	Yes
AADLNLVLY	0.963077	AADLNLVLY	0.00390638	13.2422	HLA-A*01:01	-0.20273	-2.40823	-2.2055	0.00623023	0.546832	0.875122	Yes
VSDYYSQLIY	0.975328	VSDYYSQLY	0.00288511	13.2422	HLA-A*01:01	-0.20273	-2.53984	-2.33711	0.00460141	0.546832	0.875122	Yes
ETEREYFNRY	0.868089	ETEREFNRY	0.00738723	13.2422	HLA-A*01:01	-0.20273	-2.13152	-1.92879	0.0117818	0.546832	0.875122	Yes
MSEIEAKVRY	0.903286	MSEIEAVRY	0.00635745	13.2422	HLA-A*01:01	-0.20273	-2.19672	-1.99399	0.0101394	0.546832	0.875122	Yes
KSDSGKPYYY	0.961151	KSDSGPYYY	0.00398298	13.2422	HLA-A*01:01	-0.20273	-2.39979	-2.19706	0.00635239	0.546832	0.875122	Yes
VMAPRTLIL	0.009493	VMAPRTLIL	0.0702213	13.2422	HLA-A*01:01	-0.20273	-1.15353	-0.950802	0.111995	0.546832	0.875122	Yes
YLDTVPEVY	0.984099	YLDTVPEVY	0.00191489	13.2422	HLA-A*01:01	-0.20273	-2.71786	-2.51513	0.00305404	0.546832	0.875122	Yes
FSEDGEYFAY	0.981182	FSEDGEYFY	0.00227234	13.2422	HLA-A*01:01	-0.20273	-2.64353	-2.4408	0.00362412	0.546832	0.875122	Yes
GLDQPLLK	0.007654	GLD-QPLLK	0.0785021	13.2422	HLA-A*01:01	-0.20273	-1.10512	-0.902389	0.125202	0.546832	0.875122	Yes
SSEYHYVGGFY	0.740699	SSEYHGGFY	0.00915745	13.2422	HLA-A*01:01	-0.20273	-2.03823	-1.8355	0.0146051	0.546832	0.875122	Yes
ETEPVFWYY	0.980167	ETEPVFWYY	0.00236596	13.2422	HLA-A*01:01	-0.20273	-2.62599	-2.42326	0.00377343	0.546832	0.875122	Yes
TDPTLLSV	0.040601	-TDPTLLSV	0.0361191	13.2422	HLA-A*01:01	-0.20273	-1.44226	-1.23953	0.0576059	0.546832	0.875122	Yes
MIDVTKSYY	0.94911	MIDVTKSYY	0.00465532	13.2422	HLA-A*01:01	-0.20273	-2.33205	-2.12932	0.0074247	0.546832	0.875122	Yes
YTDVSTRY	0.986198	YTD-VSTRY	0.00164255	13.2422	HLA-A*01:01	-0.20273	-2.78448	-2.58175	0.00261968	0.546832	0.875122	Yes
MLDHQPPQY	0.983011	MLDHQPPQY	0.00209362	13.2422	HLA-A*01:01	-0.20273	-2.6791	-2.47637	0.00333908	0.546832	0.875122	Yes
IIDLAGDTVRY	0.804233	IIDGDTVRY	0.00844255	13.2422	HLA-A*01:01	-0.20273	-2.07353	-1.8708	0.0134649	0.546832	0.875122	Yes
FSDPGQPMSF	0.800253	FSDPGPMSF	0.00853617	13.2422	HLA-A*01:01	-0.20273	-2.06874	-1.86601	0.0136142	0.546832	0.875122	Yes
MVDIIETVY	0.951167	MVDIIETVY	0.00451915	13.2422	HLA-A*01:01	-0.20273	-2.34494	-2.14221	0.00720752	0.546832	0.875122	Yes
ETELISTTANY	0.859001	ETESTTANY	0.0076	13.2422	HLA-A*01:01	-0.20273	-2.11919	-1.91646	0.0121211	0.546832	0.875122	Yes
GTVYEDLRY	0.630957	GTVYEDLRY	0.010366	13.2422	HLA-A*01:01	-0.20273	-1.98439	-1.78166	0.0165325	0.546832	0.875122	Yes
YIDAQFEAY	0.96729	YIDAQFEAY	0.00355745	13.2422	HLA-A*01:01	-0.20273	-2.44886	-2.24613	0.00567372	0.546832	0.875122	Yes
TEIRLRLHY	0.111094	TEIRLRLHY	0.0235064	13.2422	HLA-A*01:01	-0.20273	-1.62881	-1.42608	0.03749	0.546832	0.875122	Yes
TSEGLKLYY	0.979829	TSEGLKLYY	0.00243404	13.2422	HLA-A*01:01	-0.20273	-2.61367	-2.41094	0.00388202	0.546832	0.875122	Yes
LTDDDLLRY	0.99856	LTDDDLLRY	2.55319e-05	13.2422	HLA-A*01:01	-0.20273	-4.59292	-4.39019	4.07205e-05	0.546832	0.875122	Yes
TDQLVLIF	0.022222	-TDQLVLIF	0.0463064	13.2422	HLA-A*01:01	-0.20273	-1.33436	-1.13163	0.0738534	0.546832	0.875122	Yes
FSDPFTGGGRY	0.983066	FSDPGGGRY	0.00206809	13.2422	HLA-A*01:01	-0.20273	-2.68443	-2.4817	0.00329836	0.546832	0.875122	Yes
VLDELSVTY	0.971219	VLDELSVTY	0.00326809	13.2422	HLA-A*01:01	-0.20273	-2.48571	-2.28298	0.00521222	0.546832	0.875122	Yes
VTEIMSMGY	0.960758	VTEIMSMGY	0.00400851	13.2422	HLA-A*01:01	-0.20273	-2.39702	-2.19429	0.00639312	0.546832	0.875122	Yes
TDNIIYVY	0.672263	-TDNIIYVY	0.00990638	13.2422	HLA-A*01:01	-0.20273	-2.00408	-1.80136	0.0157995	0.546832	0.875122	Yes
GSDEPAFMYY	0.984926	GSDEPAMYY	0.00181277	13.2422	HLA-A*01:01	-0.20273	-2.74166	-2.53893	0.00289115	0.546832	0.875122	Yes
EPFLFNFLY	0.035476	EPFLFNFLY	0.0380681	13.2422	HLA-A*01:01	-0.20273	-1.41944	-1.21671	0.0607142	0.546832	0.875122	Yes
FMDPASALYR	0.609292	FMDPASALY	0.0106043	13.2422	HLA-A*01:01	-0.20273	-1.97452	-1.77179	0.0169126	0.546832	0.875122	Yes
EIDNELFQFY	0.871009	EIDNELQFY	0.00729362	13.2422	HLA-A*01:01	-0.20273	-2.13706	-1.93433	0.0116325	0.546832	0.875122	Yes
FMDDYIFTY	0.983656	FMDDYIFTY	0.00195745	13.2422	HLA-A*01:01	-0.20273	-2.70831	-2.50558	0.0031219	0.546832	0.875122	Yes
TSDHFETIMKY	0.979006	TSDETIMKY	0.0025617	13.2422	HLA-A*01:01	-0.20273	-2.59147	-2.38874	0.00408562	0.546832	0.875122	Yes
YLDQISRY	0.818914	YLD-QISRY	0.00818723	13.2422	HLA-A*01:01	-0.20273	-2.08686	-1.88413	0.0130577	0.546832	0.875122	Yes
VTENVVNLY	0.988426	VTENVVNLY	0.00138723	13.2422	HLA-A*01:01	-0.20273	-2.85785	-2.65512	0.00221248	0.546832	0.875122	Yes
SMDEKVELY	0.982198	SMDEKVELY	0.00215319	13.2422	HLA-A*01:01	-0.20273	-2.66692	-2.46419	0.00343409	0.546832	0.875122	Yes
NTDHLTTVLY	0.993142	NTDHTTVLY	0.000706383	13.2422	HLA-A*01:01	-0.20273	-3.15096	-2.94823	0.0011266	0.546832	0.875122	Yes
LTDDELFQY	0.998185	LTDDELFQY	5.95745e-05	13.2422	HLA-A*01:01	-0.20273	-4.22494	-4.02221	9.50145e-05	0.546832	0.875122	Yes
IVDEFAMRY	0.989601	IVDEFAMRY	0.00125106	13.2422	HLA-A*01:01	-0.20273	-2.90272	-2.69999	0.0019953	0.546832	0.875122	Yes
YTDHLQSYVIY	0.987499	YTDHLQSYY	0.00150638	13.2422	HLA-A*01:01	-0.20273	-2.82206	-2.61934	0.00240251	0.546832	0.875122	Yes
LTDPMFRGIY	0.940313	LTDPFRGIY	0.00504681	13.2422	HLA-A*01:01	-0.20273	-2.29698	-2.09425	0.00804908	0.546832	0.875122	Yes
VTDQNKIVTY	0.977217	VTDQNIVTY	0.00267234	13.2422	HLA-A*01:01	-0.20273	-2.57311	-2.37038	0.00426208	0.546832	0.875122	Yes
LSEQLLNNY	0.903026	LSEQLLNNY	0.00640851	13.2422	HLA-A*01:01	-0.20273	-2.19324	-1.99051	0.0102208	0.546832	0.875122	Yes
LTWDGFPLHY	0.988481	LTDGFPLHY	0.00137872	13.2422	HLA-A*01:01	-0.20273	-2.86052	-2.65779	0.00219891	0.546832	0.875122	Yes
TTEETLTMLY	0.989817	TTEETTMLY	0.00119149	13.2422	HLA-A*01:01	-0.20273	-2.92391	-2.72118	0.00190029	0.546832	0.875122	Yes
PTDATLNRLLY	0.931408	PTDATLLLY	0.00542979	13.2422	HLA-A*01:01	-0.20273	-2.26522	-2.06249	0.00865989	0.546832	0.875122	Yes
FSDTGNFGF	0.715207	FSDTGNFGF	0.00941277	13.2422	HLA-A*01:01	-0.20273	-2.02628	-1.82355	0.0150123	0.546832	0.875122	Yes
YTSYPMHDFY	0.914637	YTSPMHDFY	0.00596596	13.2422	HLA-A*01:01	-0.20273	-2.22432	-2.02159	0.00951502	0.546832	0.875122	Yes
VSDSKQFTYY	0.988288	VSDSQFTYY	0.00140426	13.2422	HLA-A*01:01	-0.20273	-2.85255	-2.64982	0.00223963	0.546832	0.875122	Yes
LLDVGLRY	0.724881	LLD-VGLRY	0.00932766	13.2422	HLA-A*01:01	-0.20273	-2.03023	-1.8275	0.0148765	0.546832	0.875122	Yes
HIDFAIQY	0.471158	HID-FAIQY	0.0121191	13.2422	HLA-A*01:01	-0.20273	-1.91653	-1.7138	0.0193287	0.546832	0.875122	Yes
DLDEIVARY	0.892309	DLDEIVARY	0.00676596	13.2422	HLA-A*01:01	-0.20273	-2.16967	-1.96694	0.0107909	0.546832	0.875122	Yes
ALDGGFQMHY	0.926227	ALDGGQMHY	0.00559149	13.2422	HLA-A*01:01	-0.20273	-2.25247	-2.04974	0.00891779	0.546832	0.875122	Yes
LTDPNYLCL	0.588011	LTDPNYLCL	0.0108766	13.2422	HLA-A*01:01	-0.20273	-1.96351	-1.76078	0.0173469	0.546832	0.875122	Yes
FMDPEMETRY	0.960236	FMDPEMTRY	0.00405957	13.2422	HLA-A*01:01	-0.20273	-2.39152	-2.18879	0.00647456	0.546832	0.875122	Yes
LSELAPSLPSY	0.875211	LSELAPSLY	0.00720851	13.2422	HLA-A*01:01	-0.20273	-2.14215	-1.93942	0.0114967	0.546832	0.875122	Yes
FAEAHYLSY	0.951077	FAEAHYLSY	0.00453617	13.2422	HLA-A*01:01	-0.20273	-2.34331	-2.14058	0.00723467	0.546832	0.875122	Yes
FLDTDTICY	0.975741	FLDTDTICY	0.00282553	13.2422	HLA-A*01:01	-0.20273	-2.5489	-2.34617	0.0045064	0.546832	0.875122	Yes
DDTHYLLYIY	0.032409	DTHYLLYIY	0.0394128	13.2422	HLA-A*01:01	-0.20273	-1.40436	-1.20163	0.0628588	0.546832	0.875122	Yes
DLDLSPLEY	0.976583	DLDLSPLEY	0.00274894	13.2422	HLA-A*01:01	-0.20273	-2.56084	-2.35811	0.00438424	0.546832	0.875122	Yes
LSEPSSLQY	0.997145	LSEPSSLQY	0.000170213	13.2422	HLA-A*01:01	-0.20273	-3.76901	-3.56628	0.00027147	0.546832	0.875122	Yes
LSELFHSRNYY	0.667145	LSEHSRNYY	0.01	13.2422	HLA-A*01:01	-0.20273	-2	-1.79727	0.0159489	0.546832	0.875122	Yes
YTSYPMHDFY	0.914637	YTSPMHDFY	0.00597447	13.2422	HLA-A*01:01	-0.20273	-2.2237	-2.02097	0.00952859	0.546832	0.875122	Yes
LTHWEQLDY	0.564271	LTHWEQLDY	0.0110638	13.2422	HLA-A*01:01	-0.20273	-1.95609	-1.75337	0.0176455	0.546832	0.875122	Yes
YTDCIPQLM	0.791003	YTDCIPQLM	0.00869787	13.2422	HLA-A*01:01	-0.20273	-2.06059	-1.85786	0.0138721	0.546832	0.875122	Yes
LSDVDAFIAY	0.961911	LSDDAFIAY	0.00394043	13.2422	HLA-A*01:01	-0.20273	-2.40446	-2.20173	0.00628453	0.546832	0.875122	Yes
LAEYDLDKY	0.756334	LAEYDLDKY	0.00901277	13.2422	HLA-A*01:01	-0.20273	-2.04514	-1.84241	0.0143743	0.546832	0.875122	Yes
ESSSVVLRY	0.932645	ESSSVVLRY	0.00533617	13.2422	HLA-A*01:01	-0.20273	-2.27277	-2.07004	0.00851058	0.546832	0.875122	Yes
LSDIERQIY	0.974534	LSDIERQIY	0.00297021	13.2422	HLA-A*01:01	-0.20273	-2.52721	-2.32448	0.00473715	0.546832	0.875122	Yes
YLDYDDTRY	0.972456	YLDYDDTRY	0.00315745	13.2422	HLA-A*01:01	-0.20273	-2.50066	-2.29793	0.00503577	0.546832	0.875122	Yes
FTEIKNLLV	0.300392	FTEIKNLLV	0.0152255	13.2422	HLA-A*01:01	-0.20273	-1.81743	-1.6147	0.024283	0.546832	0.875122	Yes
LLDIEQDTYRY	0.836083	LLDQDTYRY	0.00793191	13.2422	HLA-A*01:01	-0.20273	-2.10062	-1.89789	0.0126505	0.546832	0.875122	Yes
LTEHSSMPVE	0.002084	LTEHSSMVE	0.165864	13.2422	HLA-A*01:01	-0.20273	-0.780248	-0.577519	0.264534	0.546832	0.875122	Yes
YLETVAAYY	0.916304	YLETVAAYY	0.00591489	13.2422	HLA-A*01:01	-0.20273	-2.22805	-2.02532	0.00943358	0.546832	0.875122	Yes
LLSTYLERY	0.361597	LLSTYLERY	0.0137787	13.2422	HLA-A*01:01	-0.20273	-1.86079	-1.65806	0.0219755	0.546832	0.875122	Yes
LTDNRYLLL	0.567762	LTDNRYLLL	0.0110213	13.2422	HLA-A*01:01	-0.20273	-1.95777	-1.75504	0.0175777	0.546832	0.875122	Yes
YADGESFLGY	0.982471	YADGESFLY	0.00213617	13.2422	HLA-A*01:01	-0.20273	-2.67036	-2.46763	0.00340695	0.546832	0.875122	Yes
NSDTNIRWNNY	0.789725	NSDTNINNY	0.00874043	13.2422	HLA-A*01:01	-0.20273	-2.05847	-1.85574	0.01394	0.546832	0.875122	Yes
ESQLPEKVEY	0.529547	ESQPEKVEY	0.0114383	13.2422	HLA-A*01:01	-0.20273	-1.94164	-1.73891	0.0182428	0.546832	0.875122	Yes
ALDTLIIEY	0.945151	ALDTLIIEY	0.00484255	13.2422	HLA-A*01:01	-0.20273	-2.31493	-2.1122	0.00772332	0.546832	0.875122	Yes
ITDQGIEFY	0.996934	ITDQGIEFY	0.000229787	13.2422	HLA-A*01:01	-0.20273	-3.63867	-3.43594	0.000366484	0.546832	0.875122	Yes
LTLSILDRY	0.642934	LTLSILDRY	0.0102213	13.2422	HLA-A*01:01	-0.20273	-1.99049	-1.78777	0.0163018	0.546832	0.875122	Yes
YIEEFLQQY	0.933251	YIEEFLQQY	0.00532766	13.2422	HLA-A*01:01	-0.20273	-2.27346	-2.07073	0.00849701	0.546832	0.875122	Yes
WLDRLGESKY	0.815908	WLDRGESKY	0.00828936	13.2422	HLA-A*01:01	-0.20273	-2.08148	-1.87875	0.0132206	0.546832	0.875122	Yes
ATVFRTVLDYY	0.209332	ATVFRTDYY	0.0176255	13.2422	HLA-A*01:01	-0.20273	-1.75386	-1.55113	0.0281107	0.546832	0.875122	Yes
KMDDLNLHY	0.964775	KMDDLNLHY	0.00377021	13.2422	HLA-A*01:01	-0.20273	-2.42363	-2.2209	0.00601306	0.546832	0.875122	Yes
IIDVVRSGYY	0.624158	IIDVVSGYY	0.0104766	13.2422	HLA-A*01:01	-0.20273	-1.97978	-1.77705	0.016709	0.546832	0.875122	Yes
ATDLIRISQY	0.975438	ATDLIISQY	0.00285957	13.2422	HLA-A*01:01	-0.20273	-2.5437	-2.34097	0.00456069	0.546832	0.875122	Yes
YIEDRPLHMLY	0.913294	YIEDRPLLY	0.00604255	13.2422	HLA-A*01:01	-0.20273	-2.21878	-2.01605	0.00963718	0.546832	0.875122	Yes
SADSFQSFY	0.988679	SADSFQSFY	0.00135319	13.2422	HLA-A*01:01	-0.20273	-2.86864	-2.66591	0.00215819	0.546832	0.875122	Yes
AADIFYSRY	0.927444	AADIFYSRY	0.00554043	13.2422	HLA-A*01:01	-0.20273	-2.25646	-2.05373	0.00883634	0.546832	0.875122	Yes
NLDFQMEQY	0.94697	NLDFQMEQY	0.00473191	13.2422	HLA-A*01:01	-0.20273	-2.32496	-2.12223	0.00754686	0.546832	0.875122	Yes
RVDELLEKY	0.946686	RVDELLEKY	0.00479149	13.2422	HLA-A*01:01	-0.20273	-2.31953	-2.1168	0.00764188	0.546832	0.875122	Yes
FTDIDGQVY	0.995665	FTDIDGQVY	0.000340426	13.2422	HLA-A*01:01	-0.20273	-3.46798	-3.26525	0.00054294	0.546832	0.875122	Yes
ETEVYEGALLY	0.973666	ETEEGALLY	0.00306383	13.2422	HLA-A*01:01	-0.20273	-2.51374	-2.31101	0.00488646	0.546832	0.875122	Yes
NLDQATRVAY	0.759063	NLDQATVAY	0.00895319	13.2422	HLA-A*01:01	-0.20273	-2.04802	-1.84529	0.0142793	0.546832	0.875122	Yes
SEEARRLLGY	0.133091	SEEARRLLY	0.0218723	13.2422	HLA-A*01:01	-0.20273	-1.6601	-1.45738	0.0348839	0.546832	0.875122	Yes
GSEYLKLGY	0.732421	GSEYLKLGY	0.00923404	13.2422	HLA-A*01:01	-0.20273	-2.03461	-1.83188	0.0147272	0.546832	0.875122	Yes
LSDISVVSNY	0.940838	LSDSVVSNY	0.00500426	13.2422	HLA-A*01:01	-0.20273	-2.30066	-2.09793	0.00798121	0.546832	0.875122	Yes
LIEEALQKY	0.831973	LIEEALQKY	0.00799149	13.2422	HLA-A*01:01	-0.20273	-2.09737	-1.89464	0.0127455	0.546832	0.875122	Yes
GSDITSITERY	0.917961	GSDSITERY	0.00584681	13.2422	HLA-A*01:01	-0.20273	-2.23308	-2.03035	0.00932499	0.546832	0.875122	Yes
ASEMILVLEY	0.793193	ASEMIVLEY	0.00866383	13.2422	HLA-A*01:01	-0.20273	-2.06229	-1.85956	0.0138178	0.546832	0.875122	Yes
MVDFAMDVY	0.895415	MVDFAMDVY	0.0066383	13.2422	HLA-A*01:01	-0.20273	-2.17794	-1.97521	0.0105873	0.546832	0.875122	Yes
LVDIDLISF	0.185046	LVDIDLISF	0.018783	13.2422	HLA-A*01:01	-0.20273	-1.72624	-1.52351	0.0299567	0.546832	0.875122	Yes
TLDAVKFSQY	0.89468	TLDAVKSQY	0.00666383	13.2422	HLA-A*01:01	-0.20273	-2.17628	-1.97355	0.010628	0.546832	0.875122	Yes
LMDIFGDRY	0.930451	LMDIFGDRY	0.00546383	13.2422	HLA-A*01:01	-0.20273	-2.2625	-2.05977	0.00871418	0.546832	0.875122	Yes
LLDPRSYHTY	0.953785	LLDPSYHTY	0.00442553	13.2422	HLA-A*01:01	-0.20273	-2.35403	-2.15131	0.00705822	0.546832	0.875122	Yes
SSEELPLYY	0.994995	SSEELPLYY	0.000468085	13.2422	HLA-A*01:01	-0.20273	-3.32968	-3.12695	0.000746542	0.546832	0.875122	Yes
WSDYSDNLKY	0.983826	WSDSDNLKY	0.00193191	13.2422	HLA-A*01:01	-0.20273	-2.71401	-2.51128	0.00308118	0.546832	0.875122	Yes
MTHNLLLNY	0.672067	MTHNLLLNY	0.00993191	13.2422	HLA-A*01:01	-0.20273	-2.00297	-1.80024	0.0158403	0.546832	0.875122	Yes
LSDPVHLTV	0.639949	LSDPVHLTV	0.0102638	13.2422	HLA-A*01:01	-0.20273	-1.98869	-1.78596	0.0163696	0.546832	0.875122	Yes
FSDYPPLGR	0.323603	FSDYPPLGR	0.0146553	13.2422	HLA-A*01:01	-0.20273	-1.834	-1.63128	0.0233736	0.546832	0.875122	Yes
ETALLVDRY	0.802608	ETALLVDRY	0.00849362	13.2422	HLA-A*01:01	-0.20273	-2.07091	-1.86818	0.0135463	0.546832	0.875122	Yes
LDRISVYY	0.339481	-LDRISVYY	0.0143064	13.2422	HLA-A*01:01	-0.20273	-1.84447	-1.64174	0.022817	0.546832	0.875122	Yes
AIMELDDTLKY	0.31466	AIMDDTLKY	0.014834	13.2422	HLA-A*01:01	-0.20273	-1.82874	-1.62601	0.0236586	0.546832	0.875122	Yes
DTELKQVAYIY	0.559415	DTELKQVAY	0.0111064	13.2422	HLA-A*01:01	-0.20273	-1.95443	-1.7517	0.0177134	0.546832	0.875122	Yes
FLEPLGLAY	0.959219	FLEPLGLAY	0.00412766	13.2422	HLA-A*01:01	-0.20273	-2.3843	-2.18157	0.00658314	0.546832	0.875122	Yes
LLDDSVRVY	0.933276	LLDDSVRVY	0.00531915	13.2422	HLA-A*01:01	-0.20273	-2.27416	-2.07143	0.00848343	0.546832	0.875122	Yes
ISSEELPLYY	0.947593	ISEELPLYY	0.0047234	13.2422	HLA-A*01:01	-0.20273	-2.32574	-2.12302	0.00753329	0.546832	0.875122	Yes
ESDLDYIQY	0.988866	ESDLDYIQY	0.00131915	13.2422	HLA-A*01:01	-0.20273	-2.87971	-2.67698	0.00210389	0.546832	0.875122	Yes
HTDHHMFFDY	0.964363	HTDHHMFFY	0.00381277	13.2422	HLA-A*01:01	-0.20273	-2.41876	-2.21603	0.00608093	0.546832	0.875122	Yes
HLDAELDAY	0.889125	HLDAELDAY	0.00683404	13.2422	HLA-A*01:01	-0.20273	-2.16532	-1.96259	0.0108995	0.546832	0.875122	Yes
ITDDLHFYV	0.716534	ITDDLHFYV	0.00939574	13.2422	HLA-A*01:01	-0.20273	-2.02707	-1.82434	0.0149851	0.546832	0.875122	Yes
MVDIIETVY	0.951167	MVDIIETVY	0.00451064	13.2422	HLA-A*01:01	-0.20273	-2.34576	-2.14303	0.00719395	0.546832	0.875122	Yes
LVEEVQLNFY	0.828327	LVEEVQLFY	0.00803404	13.2422	HLA-A*01:01	-0.20273	-2.09507	-1.89234	0.0128134	0.546832	0.875122	Yes
ISEAGKDLLY	0.96179	ISEAGDLLY	0.00395745	13.2422	HLA-A*01:01	-0.20273	-2.40258	-2.19986	0.00631167	0.546832	0.875122	Yes
ADPTKLELLY	0.145963	ADPTKLLLY	0.0208936	13.2422	HLA-A*01:01	-0.20273	-1.67999	-1.47726	0.0333229	0.546832	0.875122	Yes
LLDTELDLY	0.972373	LLDTELDLY	0.00318298	13.2422	HLA-A*01:01	-0.20273	-2.49717	-2.29444	0.00507649	0.546832	0.875122	Yes
LSEEGLLRLY	0.971559	LSEEGLLLY	0.00324255	13.2422	HLA-A*01:01	-0.20273	-2.48911	-2.28638	0.0051715	0.546832	0.875122	Yes
LDALIDTYL	0.002134	LDALIDTYL	0.163549	13.2422	HLA-A*01:01	-0.20273	-0.786352	-0.583623	0.260842	0.546832	0.875122	Yes
LLDSSLEY	0.797552	LLD-SSLEY	0.00857872	13.2422	HLA-A*01:01	-0.20273	-2.06658	-1.86385	0.0136821	0.546832	0.875122	Yes
GTELGNELFY	0.927534	GTELGNLFY	0.00553191	13.2422	HLA-A*01:01	-0.20273	-2.25712	-2.0544	0.00882277	0.546832	0.875122	Yes
LTDDGRVFLW	0.342338	LTDDGVFLW	0.0142468	13.2422	HLA-A*01:01	-0.20273	-1.84628	-1.64355	0.022722	0.546832	0.875122	Yes
FADDMYSLY	0.991813	FADDMYSLY	0.000885106	13.2422	HLA-A*01:01	-0.20273	-3.053	-2.85028	0.00141164	0.546832	0.875122	Yes
ASETGFLTY	0.979952	ASETGFLTY	0.00241702	13.2422	HLA-A*01:01	-0.20273	-2.61672	-2.41399	0.00385487	0.546832	0.875122	Yes
SSDFLEFVNY	0.90451	SSDLEFVNY	0.0063234	13.2422	HLA-A*01:01	-0.20273	-2.19905	-1.99632	0.0100851	0.546832	0.875122	Yes
NVDAILEEY	0.957229	NVDAILEEY	0.00422979	13.2422	HLA-A*01:01	-0.20273	-2.37368	-2.17095	0.00674603	0.546832	0.875122	Yes
LSGFELELY	0.674115	LSGFELELY	0.00988085	13.2422	HLA-A*01:01	-0.20273	-2.00521	-1.80248	0.0157588	0.546832	0.875122	Yes
TMDIPGCLLY	0.960332	TMDIPGLLY	0.00404255	13.2422	HLA-A*01:01	-0.20273	-2.39334	-2.19061	0.00644741	0.546832	0.875122	Yes
STDKAEYTFY	0.9913	STDKAETFY	0.000970213	13.2422	HLA-A*01:01	-0.20273	-3.01313	-2.8104	0.00154738	0.546832	0.875122	Yes
YLERGKLFY	0.946929	YLERGKLFY	0.00474894	13.2422	HLA-A*01:01	-0.20273	-2.3234	-2.12067	0.00757401	0.546832	0.875122	Yes
HTDQLVLIF	0.797142	HTDQLVLIF	0.00858723	13.2422	HLA-A*01:01	-0.20273	-2.06615	-1.86342	0.0136957	0.546832	0.875122	Yes
LVDGYNVHY	0.964015	LVDGYNVHY	0.0038383	13.2422	HLA-A*01:01	-0.20273	-2.41586	-2.21313	0.00612165	0.546832	0.875122	Yes
ASEDSVLLY	0.995769	ASEDSVLLY	0.000331915	13.2422	HLA-A*01:01	-0.20273	-3.47897	-3.27624	0.000529366	0.546832	0.875122	Yes
ATSKVALVY	0.909308	ATSKVALVY	0.00617872	13.2422	HLA-A*01:01	-0.20273	-2.2091	-2.00637	0.00985436	0.546832	0.875122	Yes
FVEPVGLNY	0.974386	FVEPVGLNY	0.00299574	13.2422	HLA-A*01:01	-0.20273	-2.5235	-2.32077	0.00477787	0.546832	0.875122	Yes
ADIARMLY	0.206233	-ADIARMLY	0.0177702	13.2422	HLA-A*01:01	-0.20273	-1.75031	-1.54758	0.0283415	0.546832	0.875122	Yes
LTEKNWFHY	0.946569	LTEKNWFHY	0.0048	13.2422	HLA-A*01:01	-0.20273	-2.31876	-2.11603	0.00765545	0.546832	0.875122	Yes
LTDEGLLY	0.984138	LTDEG-LLY	0.00189787	13.2422	HLA-A*01:01	-0.20273	-2.72173	-2.519	0.00302689	0.546832	0.875122	Yes
SMDEKVELY	0.982198	SMDEKVELY	0.0021617	13.2422	HLA-A*01:01	-0.20273	-2.6652	-2.46247	0.00344767	0.546832	0.875122	Yes
VTEKVLAAVY	0.738478	VTEKVAAVY	0.00917447	13.2422	HLA-A*01:01	-0.20273	-2.03742	-1.83469	0.0146322	0.546832	0.875122	Yes
LLDVTPLSL	0.19725	LLDVTPLSL	0.0182128	13.2422	HLA-A*01:01	-0.20273	-1.73962	-1.53689	0.0290473	0.546832	0.875122	Yes
MDLLQEFY	0.199272	-MDLLQEFY	0.0181362	13.2422	HLA-A*01:01	-0.20273	-1.74145	-1.53872	0.0289251	0.546832	0.875122	Yes
SLESLTLSY	0.928319	SLESLTLSY	0.00550638	13.2422	HLA-A*01:01	-0.20273	-2.25913	-2.0564	0.00878205	0.546832	0.875122	Yes
SSELATEVHFY	0.935909	SSETEVHFY	0.0052	13.2422	HLA-A*01:01	-0.20273	-2.284	-2.08127	0.0082934	0.546832	0.875122	Yes
LLDHLSIVY	0.940789	LLDHLSIVY	0.00501277	13.2422	HLA-A*01:01	-0.20273	-2.29992	-2.09719	0.00799479	0.546832	0.875122	Yes
LADELITVY	0.950877	LADELITVY	0.00457021	13.2422	HLA-A*01:01	-0.20273	-2.34006	-2.13733	0.00728897	0.546832	0.875122	Yes
VTETNVFFY	0.984715	VTETNVFFY	0.0018383	13.2422	HLA-A*01:01	-0.20273	-2.73558	-2.53285	0.00293187	0.546832	0.875122	Yes
YSDVSGLLANY	0.98927	YSDVSGLLY	0.00128511	13.2422	HLA-A*01:01	-0.20273	-2.89106	-2.68833	0.0020496	0.546832	0.875122	Yes
HSELLEDYY	0.950852	HSELLEDYY	0.00457872	13.2422	HLA-A*01:01	-0.20273	-2.33926	-2.13653	0.00730254	0.546832	0.875122	Yes
FSELSACLY	0.974153	FSELSACLY	0.00302128	13.2422	HLA-A*01:01	-0.20273	-2.51981	-2.31708	0.00481859	0.546832	0.875122	Yes
LLDFSYEQY	0.964795	LLDFSYEQY	0.00374468	13.2422	HLA-A*01:01	-0.20273	-2.42659	-2.22386	0.00597234	0.546832	0.875122	Yes
ASDAAPLQYL	0.569353	ASDAAPLQY	0.0110043	13.2422	HLA-A*01:01	-0.20273	-1.95844	-1.75571	0.0175505	0.546832	0.875122	Yes
MTDTYLLNL	0.422771	MTDTYLLNL	0.012817	13.2422	HLA-A*01:01	-0.20273	-1.89221	-1.68948	0.0204417	0.546832	0.875122	Yes
FADEGSIFY	0.991943	FADEGSIFY	0.000859574	13.2422	HLA-A*01:01	-0.20273	-3.06572	-2.86299	0.00137092	0.546832	0.875122	Yes
CLDHVISYY	0.910032	CLDHVISYY	0.0061617	13.2422	HLA-A*01:01	-0.20273	-2.2103	-2.00757	0.00982721	0.546832	0.875122	Yes
LMEEVQTLYY	0.877824	LMEEQTLYY	0.00707234	13.2422	HLA-A*01:01	-0.20273	-2.15044	-1.94771	0.0112796	0.546832	0.875122	Yes
NADVALVNFY	0.773788	NADVAVNFY	0.00880851	13.2422	HLA-A*01:01	-0.20273	-2.0551	-1.85237	0.0140486	0.546832	0.875122	Yes
NLDIIQQEY	0.974861	NLDIIQQEY	0.00291915	13.2422	HLA-A*01:01	-0.20273	-2.53474	-2.33201	0.00465571	0.546832	0.875122	Yes
LIVEPGPPGP	0.000434	LVEPGPPGP	0.383277	13.2422	HLA-A*01:01	-0.20273	-0.416488	-0.213758	0.611282	0.546832	0.875122	Yes
LVDQNIFSFY	0.873803	LVDQNISFY	0.00724255	13.2422	HLA-A*01:01	-0.20273	-2.14011	-1.93738	0.011551	0.546832	0.875122	Yes
LSEDVRFYY	0.983451	LSEDVRFYY	0.00199149	13.2422	HLA-A*01:01	-0.20273	-2.70082	-2.49809	0.0031762	0.546832	0.875122	Yes
TSDQATLLLY	0.993872	TSDQATLLY	0.000604255	13.2422	HLA-A*01:01	-0.20273	-3.21878	-3.01605	0.000963718	0.546832	0.875122	Yes
ATALFSFLY	0.805355	ATALFSFLY	0.00841702	13.2422	HLA-A*01:01	-0.20273	-2.07484	-1.87211	0.0134242	0.546832	0.875122	Yes
VTDFIAPGY	0.974196	VTDFIAPGY	0.00301277	13.2422	HLA-A*01:01	-0.20273	-2.52103	-2.31831	0.00480502	0.546832	0.875122	Yes
FIEERLLMY	0.912742	FIEERLLMY	0.00605957	13.2422	HLA-A*01:01	-0.20273	-2.21756	-2.01483	0.00966433	0.546832	0.875122	Yes
LAEEITLHY	0.972979	LAEEITLHY	0.0031234	13.2422	HLA-A*01:01	-0.20273	-2.50537	-2.30264	0.00498147	0.546832	0.875122	Yes
ASDMLQLEY	0.996434	ASDMLQLEY	0.000289362	13.2422	HLA-A*01:01	-0.20273	-3.53856	-3.33583	0.000461499	0.546832	0.875122	Yes
ISDGKEYLFY	0.981907	ISDGKELFY	0.00220426	13.2422	HLA-A*01:01	-0.20273	-2.65674	-2.45401	0.00351553	0.546832	0.875122	Yes
TSEDRFIQY	0.979809	TSEDRFIQY	0.00245106	13.2422	HLA-A*01:01	-0.20273	-2.61065	-2.40792	0.00390917	0.546832	0.875122	Yes
MSELLFECY	0.862784	MSELLFECY	0.00753191	13.2422	HLA-A*01:01	-0.20273	-2.12309	-1.92037	0.0120125	0.546832	0.875122	Yes
LLDIGSLDY	0.952862	LLDIGSLDY	0.00443404	13.2422	HLA-A*01:01	-0.20273	-2.3532	-2.15047	0.00707179	0.546832	0.875122	Yes
LIQSAVLY	0.033487	LIQ-SAVLY	0.0389617	13.2422	HLA-A*01:01	-0.20273	-1.40936	-1.20663	0.0621395	0.546832	0.875122	Yes
FVDPYPVNKY	0.978959	FVDPYPNKY	0.00257872	13.2422	HLA-A*01:01	-0.20273	-2.5886	-2.38587	0.00411277	0.546832	0.875122	Yes
LTDRLQLTL	0.417144	LTDRLQLTL	0.0129106	13.2422	HLA-A*01:01	-0.20273	-1.88905	-1.68632	0.020591	0.546832	0.875122	Yes
SSDQCAVQLFY	0.971411	SSDQVQLFY	0.00325106	13.2422	HLA-A*01:01	-0.20273	-2.48797	-2.28525	0.00518507	0.546832	0.875122	Yes
MSDVNLKY	0.95134	MSD-VNLKY	0.00449362	13.2422	HLA-A*01:01	-0.20273	-2.3474	-2.14467	0.0071668	0.546832	0.875122	Yes
LTEQYNEQY	0.987818	LTEQYNEQY	0.00144681	13.2422	HLA-A*01:01	-0.20273	-2.83959	-2.63686	0.00230749	0.546832	0.875122	Yes
LEHLQSKY	0.083804	-LEHLQSKY	0.0265362	13.2422	HLA-A*01:01	-0.20273	-1.57616	-1.37343	0.0423222	0.546832	0.875122	Yes
FLEETNCLY	0.93208	FLEETNCLY	0.00538723	13.2422	HLA-A*01:01	-0.20273	-2.26863	-2.0659	0.00859202	0.546832	0.875122	Yes
LINYIEMHGLY	0.043335	LINEMHGLY	0.0351404	13.2422	HLA-A*01:01	-0.20273	-1.45419	-1.25146	0.056045	0.546832	0.875122	Yes
ISDLIRDSY	0.980167	ISDLIRDSY	0.00237447	13.2422	HLA-A*01:01	-0.20273	-2.62443	-2.4217	0.003787	0.546832	0.875122	Yes
DSDMQTLVY	0.993555	DSDMQTLVY	0.000638298	13.2422	HLA-A*01:01	-0.20273	-3.19498	-2.99225	0.00101801	0.546832	0.875122	Yes
MSDVNLKY	0.95134	MSD-VNLKY	0.00450213	13.2422	HLA-A*01:01	-0.20273	-2.34658	-2.14385	0.00718038	0.546832	0.875122	Yes
FTSMTRLYY	0.947835	FTSMTRLYY	0.00470638	13.2422	HLA-A*01:01	-0.20273	-2.32731	-2.12458	0.00750614	0.546832	0.875122	Yes
MSEIEAKVRY	0.903286	MSEIEAVRY	0.00636596	13.2422	HLA-A*01:01	-0.20273	-2.19614	-1.99341	0.010153	0.546832	0.875122	Yes
ELDVVREIY	0.836358	ELDVVREIY	0.0079234	13.2422	HLA-A*01:01	-0.20273	-2.10109	-1.89836	0.0126369	0.546832	0.875122	Yes
SELQSQVRY	0.142689	SELQSQVRY	0.0211234	13.2422	HLA-A*01:01	-0.20273	-1.67524	-1.47251	0.0336894	0.546832	0.875122	Yes
IVDSLTEMY	0.989374	IVDSLTEMY	0.00126809	13.2422	HLA-A*01:01	-0.20273	-2.89685	-2.69412	0.00202245	0.546832	0.875122	Yes
AMDVYKNLY	0.894017	AMDVYKNLY	0.0067234	13.2422	HLA-A*01:01	-0.20273	-2.17241	-1.96968	0.0107231	0.546832	0.875122	Yes
STDWHVVNY	0.990945	STDWHVVNY	0.00101277	13.2422	HLA-A*01:01	-0.20273	-2.99449	-2.79176	0.00161525	0.546832	0.875122	Yes
ASEYDQIRY	0.965476	ASEYDQIRY	0.0036766	13.2422	HLA-A*01:01	-0.20273	-2.43455	-2.23182	0.00586375	0.546832	0.875122	Yes
VLDGTIEY	0.662833	VLD-GTIEY	0.010017	13.2422	HLA-A*01:01	-0.20273	-1.99926	-1.79653	0.015976	0.546832	0.875122	Yes
ALDYLIGGLY	0.74158	ALDYIGGLY	0.00914043	13.2422	HLA-A*01:01	-0.20273	-2.03903	-1.8363	0.0145779	0.546832	0.875122	Yes
ESEFEMKVYY	0.851728	ESEFEMVYY	0.00772766	13.2422	HLA-A*01:01	-0.20273	-2.11195	-1.90922	0.0123247	0.546832	0.875122	Yes
ASDPFFRHY	0.98368	ASDPFFRHY	0.00194894	13.2422	HLA-A*01:01	-0.20273	-2.7102	-2.50747	0.00310833	0.546832	0.875122	Yes
CSDKMSLLLVY	0.793318	CSDKMSLLY	0.00865532	13.2422	HLA-A*01:01	-0.20273	-2.06272	-1.85999	0.0138042	0.546832	0.875122	Yes
LLEGLTVVY	0.738342	LLEGLTVVY	0.00918298	13.2422	HLA-A*01:01	-0.20273	-2.03702	-1.83429	0.0146458	0.546832	0.875122	Yes
AVDFAERHGY	0.764312	AVDFAEHGY	0.00890213	13.2422	HLA-A*01:01	-0.20273	-2.05051	-1.84778	0.0141979	0.546832	0.875122	Yes
SPGADLLQVL	0.000661	SGADLLQVL	0.313745	13.2422	HLA-A*01:01	-0.20273	-0.503424	-0.300694	0.500387	0.546832	0.875122	Yes
LLDPKYGMFRY	0.869113	LLDPGMFRY	0.00734468	13.2422	HLA-A*01:01	-0.20273	-2.13403	-1.9313	0.0117139	0.546832	0.875122	Yes
ELDIGDATQVY	0.86535	ELDDATQVY	0.00747234	13.2422	HLA-A*01:01	-0.20273	-2.12654	-1.92381	0.0119175	0.546832	0.875122	Yes
TLDTKPGLY	0.974478	TLDTKPGLY	0.00297872	13.2422	HLA-A*01:01	-0.20273	-2.52597	-2.32324	0.00475072	0.546832	0.875122	Yes
YLDSIPPGQY	0.970676	YLDSPPGQY	0.00330213	13.2422	HLA-A*01:01	-0.20273	-2.48121	-2.27848	0.00526652	0.546832	0.875122	Yes
LLDLMKNL	0.002159	LLD-LMKNL	0.162409	13.2422	HLA-A*01:01	-0.20273	-0.789391	-0.586662	0.259023	0.546832	0.875122	Yes
ITGDVEVVL	0.005391	ITGDVEVVL	0.0954809	13.2422	HLA-A*01:01	-0.20273	-1.02008	-0.817354	0.152281	0.546832	0.875122	Yes
NLDPKITEY	0.98361	NLDPKITEY	0.00197447	13.2422	HLA-A*01:01	-0.20273	-2.70455	-2.50182	0.00314905	0.546832	0.875122	Yes
KSELGLNFY	0.911035	KSELGLNFY	0.00611064	13.2422	HLA-A*01:01	-0.20273	-2.21391	-2.01118	0.00974577	0.546832	0.875122	Yes
NSDVSLLNY	0.992095	NSDVSLLNY	0.000842553	13.2422	HLA-A*01:01	-0.20273	-3.0744	-2.87167	0.00134378	0.546832	0.875122	Yes
NTEVLKNMGY	0.824863	NTELKNMGY	0.00811064	13.2422	HLA-A*01:01	-0.20273	-2.09094	-1.88822	0.0129355	0.546832	0.875122	Yes
LKDDLLLY	0.043048	-LKDDLLLY	0.0352681	13.2422	HLA-A*01:01	-0.20273	-1.45262	-1.24989	0.0562486	0.546832	0.875122	Yes
WTDINVVVY	0.97107	WTDINVVVY	0.00328511	13.2422	HLA-A*01:01	-0.20273	-2.48345	-2.28072	0.00523937	0.546832	0.875122	Yes
MVDPFHTLF	0.814527	MVDPFHTLF	0.0083234	13.2422	HLA-A*01:01	-0.20273	-2.0797	-1.87697	0.0132749	0.546832	0.875122	Yes
LVEVEGDNRY	0.732554	LVEEGDNRY	0.00922553	13.2422	HLA-A*01:01	-0.20273	-2.03501	-1.83228	0.0147137	0.546832	0.875122	Yes
HLDPSQRALY	0.973432	HLDPSQALY	0.00309787	13.2422	HLA-A*01:01	-0.20273	-2.50894	-2.30621	0.00494075	0.546832	0.875122	Yes
TTEILRSMLY	0.951686	TTELRSMLY	0.00446809	13.2422	HLA-A*01:01	-0.20273	-2.34988	-2.14715	0.00712608	0.546832	0.875122	Yes
MVDFAMDVY	0.895415	MVDFAMDVY	0.00662979	13.2422	HLA-A*01:01	-0.20273	-2.1785	-1.97577	0.0105738	0.546832	0.875122	Yes
NLEEISNYY	0.906781	NLEEISNYY	0.00624681	13.2422	HLA-A*01:01	-0.20273	-2.20434	-2.00161	0.00996294	0.546832	0.875122	Yes
ATESVSLYYY	0.976351	ATESVSLYY	0.00279149	13.2422	HLA-A*01:01	-0.20273	-2.55416	-2.35143	0.00445211	0.546832	0.875122	Yes
HLDIAQQNLY	0.948018	HLDAQQNLY	0.00468936	13.2422	HLA-A*01:01	-0.20273	-2.32889	-2.12616	0.00747899	0.546832	0.875122	Yes
RVDFQGMEY	0.971681	RVDFQGMEY	0.00322553	13.2422	HLA-A*01:01	-0.20273	-2.4914	-2.28867	0.00514435	0.546832	0.875122	Yes
FLDPASAGIGY	0.904438	FLDPASIGY	0.00633191	13.2422	HLA-A*01:01	-0.20273	-2.19846	-1.99574	0.0100987	0.546832	0.875122	Yes
TDKLKELY	0.715371	-TDKLKELY	0.00940426	13.2422	HLA-A*01:01	-0.20273	-2.02668	-1.82395	0.0149987	0.546832	0.875122	Yes
GTLDSVLRY	0.85826	GTLDSVLRY	0.00761702	13.2422	HLA-A*01:01	-0.20273	-2.11821	-1.91549	0.0121483	0.546832	0.875122	Yes
FLDKVVGLQK	0.05767	FLDKVGLQK	0.0311915	13.2422	HLA-A*01:01	-0.20273	-1.50596	-1.30323	0.0497469	0.546832	0.875122	Yes
PLDHLKPLEY	0.743179	PLDHLPLEY	0.00913191	13.2422	HLA-A*01:01	-0.20273	-2.03944	-1.83671	0.0145644	0.546832	0.875122	Yes
HLPETKFSEL	0.00276	HLETKFSEL	0.140094	13.2422	HLA-A*01:01	-0.20273	-0.853582	-0.650852	0.223433	0.546832	0.875122	Yes
LLDDMNHCY	0.982705	LLDDMNHCY	0.00211915	13.2422	HLA-A*01:01	-0.20273	-2.67384	-2.47111	0.0033798	0.546832	0.875122	Yes
HTDILKEKY	0.993679	HTDILKEKY	0.000612766	13.2422	HLA-A*01:01	-0.20273	-3.21271	-3.00998	0.000977292	0.546832	0.875122	Yes
STDPREALQY	0.998055	STDPEALQY	6.80851e-05	13.2422	HLA-A*01:01	-0.20273	-4.16695	-3.96422	0.000108588	0.546832	0.875122	Yes
FMDVSNPFY	0.958034	FMDVSNPFY	0.00418723	13.2422	HLA-A*01:01	-0.20273	-2.37807	-2.17534	0.00667816	0.546832	0.875122	Yes
PSDLLVNVY	0.911107	PSDLLVNVY	0.00610213	13.2422	HLA-A*01:01	-0.20273	-2.21452	-2.01179	0.00973219	0.546832	0.875122	Yes
FVEPYFDEY	0.954173	FVEPYFDEY	0.00436596	13.2422	HLA-A*01:01	-0.20273	-2.35992	-2.15719	0.0069632	0.546832	0.875122	Yes
LTDTTILQV	0.619462	LTDTTILQV	0.0105277	13.2422	HLA-A*01:01	-0.20273	-1.97767	-1.77494	0.0167904	0.546832	0.875122	Yes
YTLYRPEEGY	0.52053	YTLYRPEEY	0.011566	13.2422	HLA-A*01:01	-0.20273	-1.93682	-1.73409	0.0184464	0.546832	0.875122	Yes
NVDGTHWLEY	0.954184	NVDGTHLEY	0.00435745	13.2422	HLA-A*01:01	-0.20273	-2.36077	-2.15804	0.00694963	0.546832	0.875122	Yes
LIDNSFNRY	0.963168	LIDNSFNRY	0.00388936	13.2422	HLA-A*01:01	-0.20273	-2.41012	-2.20739	0.00620309	0.546832	0.875122	Yes
PSDPQVILY	0.994973	PSDPQVILY	0.000476596	13.2422	HLA-A*01:01	-0.20273	-3.32185	-3.11912	0.000760116	0.546832	0.875122	Yes
DSERFFIRY	0.87017	DSERFFIRY	0.00731915	13.2422	HLA-A*01:01	-0.20273	-2.13554	-1.93281	0.0116732	0.546832	0.875122	Yes
SVEEFVERY	0.901326	SVEEFVERY	0.00650213	13.2422	HLA-A*01:01	-0.20273	-2.18694	-1.98422	0.0103701	0.546832	0.875122	Yes
SIDVAGNLDY	0.882104	SIDVAGNLY	0.0069617	13.2422	HLA-A*01:01	-0.20273	-2.15728	-1.95456	0.0111031	0.546832	0.875122	Yes
NVDESLLGY	0.973096	NVDESLLGY	0.00310638	13.2422	HLA-A*01:01	-0.20273	-2.50775	-2.30502	0.00495433	0.546832	0.875122	Yes
YVDDVFLRV	0.648416	YVDDVFLRV	0.0101617	13.2422	HLA-A*01:01	-0.20273	-1.99303	-1.7903	0.0162068	0.546832	0.875122	Yes
YSTDENFRY	0.963823	YSTDENFRY	0.00385532	13.2422	HLA-A*01:01	-0.20273	-2.41394	-2.21121	0.00614879	0.546832	0.875122	Yes
VLDELKHYY	0.983687	VLDELKHYY	0.00194043	13.2422	HLA-A*01:01	-0.20273	-2.7121	-2.50937	0.00309476	0.546832	0.875122	Yes
ISETPIIGNKY	0.845001	ISETPGNKY	0.00782979	13.2422	HLA-A*01:01	-0.20273	-2.10625	-1.90352	0.0124876	0.546832	0.875122	Yes
SSEQLFLRY	0.980235	SSEQLFLRY	0.00234894	13.2422	HLA-A*01:01	-0.20273	-2.62913	-2.4264	0.00374628	0.546832	0.875122	Yes
ASDALDKIRY	0.941511	ASDALDIRY	0.00498723	13.2422	HLA-A*01:01	-0.20273	-2.30214	-2.09941	0.00795407	0.546832	0.875122	Yes
SEPGSIALNSY	0.057717	SEPGSIALY	0.031183	13.2422	HLA-A*01:01	-0.20273	-1.50608	-1.30335	0.0497333	0.546832	0.875122	Yes
LEDLDSRVLYY	0.748663	LLDSRVLYY	0.00909787	13.2422	HLA-A*01:01	-0.20273	-2.04106	-1.83833	0.0145101	0.546832	0.875122	Yes
HSDLHILDF	0.690139	HSDLHILDF	0.00969362	13.2422	HLA-A*01:01	-0.20273	-2.01351	-1.81078	0.0154602	0.546832	0.875122	Yes
IMDSTEAQLRY	0.891744	IMDEAQLRY	0.00677447	13.2422	HLA-A*01:01	-0.20273	-2.16912	-1.9664	0.0108045	0.546832	0.875122	Yes
ILDDFREAY	0.93391	ILDDFREAY	0.0052766	13.2422	HLA-A*01:01	-0.20273	-2.27765	-2.07492	0.00841557	0.546832	0.875122	Yes
IVDSLTEMY	0.989374	IVDSLTEMY	0.0012766	13.2422	HLA-A*01:01	-0.20273	-2.89395	-2.69122	0.00203602	0.546832	0.875122	Yes
TDHLFFKY	0.625955	-TDHLFFKY	0.0104426	13.2422	HLA-A*01:01	-0.20273	-1.98119	-1.77846	0.0166547	0.546832	0.875122	Yes
TADTLMGLRY	0.946285	TADTLGLRY	0.00480851	13.2422	HLA-A*01:01	-0.20273	-2.31799	-2.11526	0.00766902	0.546832	0.875122	Yes
FTAKSPLMY	0.984452	FTAKSPLMY	0.00185532	13.2422	HLA-A*01:01	-0.20273	-2.73158	-2.52885	0.00295902	0.546832	0.875122	Yes
LSLARGLDYY	0.480779	LSARGLDYY	0.0119745	13.2422	HLA-A*01:01	-0.20273	-1.92174	-1.71901	0.0190979	0.546832	0.875122	Yes
LSDVFPGVQY	0.975337	LSDVPGVQY	0.0028766	13.2422	HLA-A*01:01	-0.20273	-2.54112	-2.33839	0.00458784	0.546832	0.875122	Yes
LLDGFLVNY	0.831894	LLDGFLVNY	0.008	13.2422	HLA-A*01:01	-0.20273	-2.09691	-1.89418	0.0127591	0.546832	0.875122	Yes
SEEARRLLGY	0.133091	SEEARRLLY	0.0218638	13.2422	HLA-A*01:01	-0.20273	-1.66027	-1.45754	0.0348703	0.546832	0.875122	Yes
PSDPRYHEVHY	0.823363	PSDPHEVHY	0.00814468	13.2422	HLA-A*01:01	-0.20273	-2.08913	-1.8864	0.0129898	0.546832	0.875122	Yes
TSDELEDLRY	0.992791	TSDELDLRY	0.000740426	13.2422	HLA-A*01:01	-0.20273	-3.13052	-2.92779	0.00118089	0.546832	0.875122	Yes
MSEIADLTY	0.977349	MSEIADLTY	0.00266383	13.2422	HLA-A*01:01	-0.20273	-2.57449	-2.37176	0.0042485	0.546832	0.875122	Yes
VSDRYRFLY	0.982135	VSDRYRFLY	0.00217021	13.2422	HLA-A*01:01	-0.20273	-2.6635	-2.46077	0.00346124	0.546832	0.875122	Yes
ATEFIMNEY	0.972462	ATEFIMNEY	0.00314894	13.2422	HLA-A*01:01	-0.20273	-2.50184	-2.29911	0.00502219	0.546832	0.875122	Yes
GTEFTTILY	0.975365	GTEFTTILY	0.00286809	13.2422	HLA-A*01:01	-0.20273	-2.54241	-2.33968	0.00457427	0.546832	0.875122	Yes
RMDNIYFEY	0.86751	RMDNIYFEY	0.00740426	13.2422	HLA-A*01:01	-0.20273	-2.13052	-1.92779	0.0118089	0.546832	0.875122	Yes
MTDPNVALTF	0.794468	MTDPNALTF	0.00862979	13.2422	HLA-A*01:01	-0.20273	-2.064	-1.86127	0.0137635	0.546832	0.875122	Yes
LTDTFTAYY	0.997061	LTDTFTAYY	0.000178723	13.2422	HLA-A*01:01	-0.20273	-3.74782	-3.54509	0.000285043	0.546832	0.875122	Yes
HSEVLIDLTEY	0.759767	HSEIDLTEY	0.00894468	13.2422	HLA-A*01:01	-0.20273	-2.04844	-1.84571	0.0142657	0.546832	0.875122	Yes
FSEEDFRLY	0.977702	FSEEDFRLY	0.00262128	13.2422	HLA-A*01:01	-0.20273	-2.58149	-2.37876	0.00418064	0.546832	0.875122	Yes
GTDRTGFTFKY	0.930831	GTDRTGFKY	0.00544681	13.2422	HLA-A*01:01	-0.20273	-2.26386	-2.06113	0.00868704	0.546832	0.875122	Yes
TLDLIDEAY	0.916346	TLDLIDEAY	0.00590638	13.2422	HLA-A*01:01	-0.20273	-2.22868	-2.02595	0.00942	0.546832	0.875122	Yes
KSDVETIFSKY	0.888784	KSDVETSKY	0.00684255	13.2422	HLA-A*01:01	-0.20273	-2.16478	-1.96205	0.0109131	0.546832	0.875122	Yes
DMDKVLLKY	0.956484	DMDKVLLKY	0.00428936	13.2422	HLA-A*01:01	-0.20273	-2.36761	-2.16488	0.00684104	0.546832	0.875122	Yes
RLDVLVNNAY	0.585064	RLDVVNNAY	0.0109191	13.2422	HLA-A*01:01	-0.20273	-1.96181	-1.75908	0.0174148	0.546832	0.875122	Yes
NLEEGKLAFY	0.706528	NLEEGKLFY	0.0095234	13.2422	HLA-A*01:01	-0.20273	-2.02121	-1.81848	0.0151887	0.546832	0.875122	Yes
LLGELPRLLLL	0.197551	LLLPRLLLL	0.0293693	10.7614	HLA-A*02:01	-0.0205165	-1.53211	-1.51159	0.03079	0.637366	0.668531	Yes
TEDELQDKIHP	1.9e-05	TEDELQIHP	0.706038	10.7614	HLA-A*02:01	-0.0205165	-0.151172	-0.130655	0.740192	0.637366	0.668531	Yes
ALFARPDLLLL	0.781738	ALFPDLLLL	0.00923148	10.7614	HLA-A*02:01	-0.0205165	-2.03473	-2.01421	0.00967804	0.637366	0.668531	Yes
VLWDRTFSLF	0.258816	VLWDRTFSL	0.0254501	10.7614	HLA-A*02:01	-0.0205165	-1.59431	-1.57379	0.0266812	0.637366	0.668531	Yes
KLWEMDNMLI	0.772091	KLWEDNMLI	0.00955603	10.7614	HLA-A*02:01	-0.0205165	-2.01972	-1.99921	0.0100183	0.637366	0.668531	Yes
ILDEMSHKLRL	0.646582	ILDEMSHKL	0.0126546	10.7614	HLA-A*02:01	-0.0205165	-1.89775	-1.87723	0.0132668	0.637366	0.668531	Yes
GILTKELLHSV	0.356132	GILELLHSV	0.0208634	10.7614	HLA-A*02:01	-0.0205165	-1.68061	-1.6601	0.0218727	0.637366	0.668531	Yes
ILWEHLEIL	0.948418	ILWEHLEIL	0.00372015	10.7614	HLA-A*02:01	-0.0205165	-2.42944	-2.40892	0.00390011	0.637366	0.668531	Yes
ALNEEAGRLLL	0.359303	ALNEEALLL	0.020741	10.7614	HLA-A*02:01	-0.0205165	-1.68317	-1.66265	0.0217443	0.637366	0.668531	Yes
FLAERLYAEV	0.796408	FLAERLYEV	0.00885181	10.7614	HLA-A*02:01	-0.0205165	-2.05297	-2.03245	0.00928001	0.637366	0.668531	Yes
ILMEHIHKL	0.998369	ILMEHIHKL	2.44948e-05	10.7614	HLA-A*02:01	-0.0205165	-4.61093	-4.59041	2.56797e-05	0.637366	0.668531	Yes
FLWERPTLL	0.993354	FLWERPTLL	0.000324556	10.7614	HLA-A*02:01	-0.0205165	-3.48871	-3.46819	0.000340256	0.637366	0.668531	Yes
ILLDERGQIKL	0.853378	ILLDGQIKL	0.00729026	10.7614	HLA-A*02:01	-0.0205165	-2.13726	-2.11674	0.00764293	0.637366	0.668531	Yes
SLLEHLSHV	0.993803	SLLEHLSHV	0.000278628	10.7614	HLA-A*02:01	-0.0205165	-3.55497	-3.53446	0.000292107	0.637366	0.668531	Yes
TLWVDPYEV	0.954653	TLWVDPYEV	0.00336803	10.7614	HLA-A*02:01	-0.0205165	-2.47262	-2.45211	0.00353096	0.637366	0.668531	Yes
ILMEHIHKL	0.998369	ILMEHIHKL	2.14329e-05	10.7614	HLA-A*02:01	-0.0205165	-4.66892	-4.6484	2.24698e-05	0.637366	0.668531	Yes
FLYKEKLVSV	0.94504	FLYEKLVSV	0.00387936	10.7614	HLA-A*02:01	-0.0205165	-2.41124	-2.39072	0.00406703	0.637366	0.668531	Yes
LLIDDKGTIKL	0.812588	LLIDGTIKL	0.00845683	10.7614	HLA-A*02:01	-0.0205165	-2.07279	-2.05228	0.00886592	0.637366	0.668531	Yes
GLIDVHVHL	0.976933	GLIDVHVHL	0.00183711	10.7614	HLA-A*02:01	-0.0205165	-2.73586	-2.71535	0.00192598	0.637366	0.668531	Yes
VLWDRTFSL	0.989579	VLWDRTFSL	0.000688916	10.7614	HLA-A*02:01	-0.0205165	-3.16183	-3.14132	0.000722242	0.637366	0.668531	Yes
YLFERIKEL	0.993599	YLFERIKEL	0.000303123	10.7614	HLA-A*02:01	-0.0205165	-3.51838	-3.49786	0.000317787	0.637366	0.668531	Yes
LLDPNVKSIFV	0.565322	LLDPNVIFV	0.0146846	10.7614	HLA-A*02:01	-0.0205165	-1.83314	-1.81262	0.015395	0.637366	0.668531	Yes
ALTELLAKI	0.861126	ALTELLAKI	0.0070147	10.7614	HLA-A*02:01	-0.0205165	-2.15399	-2.13347	0.00735403	0.637366	0.668531	Yes
RVLPPSALQSV	0.406429	RVLPPLQSV	0.0192437	10.7614	HLA-A*02:01	-0.0205165	-1.71571	-1.69519	0.0201746	0.637366	0.668531	Yes
FLYQRLVVGA	0.33064	FLYQRLVGA	0.0220147	10.7614	HLA-A*02:01	-0.0205165	-1.65729	-1.63677	0.0230796	0.637366	0.668531	Yes
KLYDIDVAKV	0.950877	KLYDDVAKV	0.00359461	10.7614	HLA-A*02:01	-0.0205165	-2.44435	-2.42383	0.0037685	0.637366	0.668531	Yes
SLLPEGPPAI	0.83557	SLLEGPPAI	0.00782915	10.7614	HLA-A*02:01	-0.0205165	-2.10629	-2.08577	0.00820788	0.637366	0.668531	Yes
HLTDITLKV	0.959967	HLTDITLKV	0.00303429	10.7614	HLA-A*02:01	-0.0205165	-2.51794	-2.49743	0.00318108	0.637366	0.668531	Yes
LLFDHLEPIEL	0.915782	LLFDEPIEL	0.00512247	10.7614	HLA-A*02:01	-0.0205165	-2.29052	-2.27	0.00537027	0.637366	0.668531	Yes
GLIEILKKV	0.976488	GLIEILKKV	0.00189222	10.7614	HLA-A*02:01	-0.0205165	-2.72303	-2.70251	0.00198376	0.637366	0.668531	Yes
FASHVSPEV	0.621576	FASHVSPEV	0.0132027	10.7614	HLA-A*02:01	-0.0205165	-1.87934	-1.85882	0.0138414	0.637366	0.668531	Yes
SLLEKQQIYL	0.860241	SLLEQQIYL	0.00704225	10.7614	HLA-A*02:01	-0.0205165	-2.15229	-2.13177	0.00738292	0.637366	0.668531	Yes
FVFDRPLPVS	0.069446	FVFDRPLPV	0.0468218	10.7614	HLA-A*02:01	-0.0205165	-1.32955	-1.30904	0.0490868	0.637366	0.668531	Yes
KLYQEVEIASV	0.727357	KLYQEVESV	0.0107318	10.7614	HLA-A*02:01	-0.0205165	-1.96933	-1.94881	0.0112509	0.637366	0.668531	Yes
VLLRVLILL	0.566527	VLLRVLILL	0.0146387	10.7614	HLA-A*02:01	-0.0205165	-1.8345	-1.81398	0.0153468	0.637366	0.668531	Yes
SILHDVVEV	0.918193	SILHDVVEV	0.00502756	10.7614	HLA-A*02:01	-0.0205165	-2.29864	-2.27813	0.00527076	0.637366	0.668531	Yes
SLITRLLEV	0.978377	SLITRLLEV	0.00172688	10.7614	HLA-A*02:01	-0.0205165	-2.76274	-2.74222	0.00181042	0.637366	0.668531	Yes
GLLAGDRLVEV	0.81551	GLLDRLVEV	0.00836497	10.7614	HLA-A*02:01	-0.0205165	-2.07754	-2.05702	0.00876962	0.637366	0.668531	Yes
ALVDHVAEL	0.985657	ALVDHVAEL	0.00103184	10.7614	HLA-A*02:01	-0.0205165	-2.98639	-2.96587	0.00108176	0.637366	0.668531	Yes
TLLDPNEKYLL	0.640388	TLLDPNYLL	0.0127863	10.7614	HLA-A*02:01	-0.0205165	-1.89326	-1.87274	0.0134048	0.637366	0.668531	Yes
RLFDEPQLASL	0.920384	RLFDELASL	0.0049357	10.7614	HLA-A*02:01	-0.0205165	-2.30665	-2.28613	0.00517446	0.637366	0.668531	Yes
FIWPMLIHI	0.78378	FIWPMLIHI	0.00916718	10.7614	HLA-A*02:01	-0.0205165	-2.03776	-2.01725	0.00961064	0.637366	0.668531	Yes
VSTHEQSE	5e-06	VST-HEQSE	0.84819	10.7614	HLA-A*02:01	-0.0205165	-0.0715066	-0.0509901	0.889221	0.637366	0.668531	Yes
FIFDVHVHEV	0.936035	FIFDHVHEV	0.00429577	10.7614	HLA-A*02:01	-0.0205165	-2.36696	-2.34644	0.00450358	0.637366	0.668531	Yes
FLLDKPQDLSI	0.86369	FLLDKPLSI	0.00691672	10.7614	HLA-A*02:01	-0.0205165	-2.1601	-2.13958	0.00725131	0.637366	0.668531	Yes
SLLDIIEKVMA	0.577922	SLLDIIEKA	0.0143876	10.7614	HLA-A*02:01	-0.0205165	-1.84201	-1.82149	0.0150836	0.637366	0.668531	Yes
RLIAQRYLL	0.46527	RLIAQRYLL	0.0174158	10.7614	HLA-A*02:01	-0.0205165	-1.75906	-1.73854	0.0182583	0.637366	0.668531	Yes
KLWEMDNMLI	0.772091	KLWEDNMLI	0.00955909	10.7614	HLA-A*02:01	-0.0205165	-2.01958	-1.99907	0.0100215	0.637366	0.668531	Yes
LLHDGIPVV	0.975772	LLHDGIPVV	0.00195958	10.7614	HLA-A*02:01	-0.0205165	-2.70784	-2.68732	0.00205438	0.637366	0.668531	Yes
ALTWLIPTL	0.825898	ALTWLIPTL	0.00812921	10.7614	HLA-A*02:01	-0.0205165	-2.08995	-2.06944	0.00852246	0.637366	0.668531	Yes
KLLGELHTL	0.986676	KLLGELHTL	0.000949173	10.7614	HLA-A*02:01	-0.0205165	-3.02265	-3.00214	0.000995089	0.637366	0.668531	Yes
FLLDPVKGERL	0.871498	FLLDPVERL	0.00660441	10.7614	HLA-A*02:01	-0.0205165	-2.18017	-2.15965	0.00692389	0.637366	0.668531	Yes
KLIDETQDMLL	0.886657	KLIDETMLL	0.00612064	10.7614	HLA-A*02:01	-0.0205165	-2.2132	-2.19269	0.00641672	0.637366	0.668531	Yes
GLWGPEEEPHL	0.821202	GLWEEEPHL	0.00823637	10.7614	HLA-A*02:01	-0.0205165	-2.08426	-2.06375	0.00863481	0.637366	0.668531	Yes
TLADLRVLFGI	0.220236	TLADVLFGI	0.0277434	10.7614	HLA-A*02:01	-0.0205165	-1.55684	-1.53632	0.0290855	0.637366	0.668531	Yes
FLAEHPNVTL	0.951748	FLAEHPVTL	0.00354256	10.7614	HLA-A*02:01	-0.0205165	-2.45068	-2.43017	0.00371393	0.637366	0.668531	Yes
YLTHDSPSV	0.938404	YLTHDSPSV	0.00417942	10.7614	HLA-A*02:01	-0.0205165	-2.37888	-2.35837	0.0043816	0.637366	0.668531	Yes
SLLRSIFTV	0.954979	SLLRSIFTV	0.00334354	10.7614	HLA-A*02:01	-0.0205165	-2.47579	-2.45528	0.00350528	0.637366	0.668531	Yes
ALDPLADKILI	0.179243	ALDPDKILI	0.0307961	10.7614	HLA-A*02:01	-0.0205165	-1.5115	-1.49099	0.0322858	0.637366	0.668531	Yes
TLLRLLYEA	0.543648	TLLRLLYEA	0.0152113	10.7614	HLA-A*02:01	-0.0205165	-1.81783	-1.79732	0.0159471	0.637366	0.668531	Yes
YLHDQNPDAAL	0.6867	YLHDQNPAL	0.0116779	10.7614	HLA-A*02:01	-0.0205165	-1.93264	-1.91212	0.0122428	0.637366	0.668531	Yes
SLIEKLWQT	0.975714	SLIEKLWQT	0.00197183	10.7614	HLA-A*02:01	-0.0205165	-2.70513	-2.68461	0.00206722	0.637366	0.668531	Yes
FLDENVHFF	0.973972	FLDENVHFF	0.0021188	10.7614	HLA-A*02:01	-0.0205165	-2.67391	-2.65339	0.0022213	0.637366	0.668531	Yes
RLLDLENIQI	0.77861	RLLDENIQI	0.00933252	10.7614	HLA-A*02:01	-0.0205165	-2.03	-2.00948	0.00978397	0.637366	0.668531	Yes
FLLRVGADPAL	0.462217	FLLGADPAL	0.0175352	10.7614	HLA-A*02:01	-0.0205165	-1.75609	-1.73557	0.0183835	0.637366	0.668531	Yes
YLDHTADVQL	0.705316	YLDHTDVQL	0.0112431	10.7614	HLA-A*02:01	-0.0205165	-1.94911	-1.9286	0.011787	0.637366	0.668531	Yes
FLFLDRTYV	0.887226	FLFLDRTYV	0.00609002	10.7614	HLA-A*02:01	-0.0205165	-2.21538	-2.19486	0.00638462	0.637366	0.668531	Yes
VLFSSPPVILL	0.614881	VLFPPVILL	0.0133711	10.7614	HLA-A*02:01	-0.0205165	-1.87383	-1.85332	0.0140179	0.637366	0.668531	Yes
HLSVVSVTV	0.686497	HLSVVSVTV	0.0116871	10.7614	HLA-A*02:01	-0.0205165	-1.93229	-1.91178	0.0122524	0.637366	0.668531	Yes
NLASFIEQVAV	0.193094	NLASFIEQV	0.0297091	10.7614	HLA-A*02:01	-0.0205165	-1.52711	-1.50659	0.0311463	0.637366	0.668531	Yes
VLLGHIFYV	0.988681	VLLGHIFYV	0.00077771	10.7614	HLA-A*02:01	-0.0205165	-3.10918	-3.08867	0.000815331	0.637366	0.668531	Yes
SLLDRFLATV	0.826343	SLLDFLATV	0.00811084	10.7614	HLA-A*02:01	-0.0205165	-2.09093	-2.07042	0.0085032	0.637366	0.668531	Yes
KLIEKLDIKL	0.866426	KLIELDIKL	0.0068218	10.7614	HLA-A*02:01	-0.0205165	-2.1661	-2.14558	0.0071518	0.637366	0.668531	Yes
ILLDRLLYL	0.98446	ILLDRLLYL	0.00118187	10.7614	HLA-A*02:01	-0.0205165	-2.92743	-2.90691	0.00123905	0.637366	0.668531	Yes
ALITRIFGV	0.96066	ALITRIFGV	0.00297918	10.7614	HLA-A*02:01	-0.0205165	-2.5259	-2.50539	0.0031233	0.637366	0.668531	Yes
LLDRFLATV	0.786676	LLDRFLATV	0.00907532	10.7614	HLA-A*02:01	-0.0205165	-2.04214	-2.02162	0.00951434	0.637366	0.668531	Yes
RLFNDPVAMV	0.864046	RLFNDPVAV	0.00690447	10.7614	HLA-A*02:01	-0.0205165	-2.16087	-2.14035	0.00723847	0.637366	0.668531	Yes
LLEKVPTL	0.477544	LL-EKVPTL	0.0170943	10.7614	HLA-A*02:01	-0.0205165	-1.76715	-1.74663	0.0179212	0.637366	0.668531	Yes
FLWEYGDLHLF	0.489249	FLWEGDLHL	0.0167667	10.7614	HLA-A*02:01	-0.0205165	-1.77555	-1.75504	0.0175778	0.637366	0.668531	Yes
GLPRFGIEMV	0.123918	GLPFGIEMV	0.0368034	10.7614	HLA-A*02:01	-0.0205165	-1.43411	-1.4136	0.0385838	0.637366	0.668531	Yes
VLWKEILFL	0.903036	VLWKEILFL	0.0055695	10.7614	HLA-A*02:01	-0.0205165	-2.25418	-2.23367	0.00583893	0.637366	0.668531	Yes
SLLHLGALYGI	0.128699	SLLGALYGI	0.0360961	10.7614	HLA-A*02:01	-0.0205165	-1.44254	-1.42202	0.0378423	0.637366	0.668531	Yes
SLQEFVKAFYL	0.428269	SLQEFVFYL	0.0185058	10.7614	HLA-A*02:01	-0.0205165	-1.73269	-1.71218	0.019401	0.637366	0.668531	Yes
LLFPQIEGIKI	0.346105	LLFPQIIKI	0.0213288	10.7614	HLA-A*02:01	-0.0205165	-1.67103	-1.65052	0.0223606	0.637366	0.668531	Yes
FLSTLHEVYL	0.490288	FLSTHEVYL	0.0167269	10.7614	HLA-A*02:01	-0.0205165	-1.77658	-1.75607	0.017536	0.637366	0.668531	Yes
SLYDWNVKL	0.988597	SLYDWNVKL	0.000783833	10.7614	HLA-A*02:01	-0.0205165	-3.10578	-3.08526	0.000821751	0.637366	0.668531	Yes
SLIGHLQTL	0.980902	SLIGHLQTL	0.00151868	10.7614	HLA-A*02:01	-0.0205165	-2.81853	-2.79802	0.00159214	0.637366	0.668531	Yes
SLLSHVEQL	0.977751	SLLSHVEQL	0.00176975	10.7614	HLA-A*02:01	-0.0205165	-2.75209	-2.73157	0.00185536	0.637366	0.668531	Yes
FLLEQEKTQAL	0.841644	FLLEQTQAL	0.00763625	10.7614	HLA-A*02:01	-0.0205165	-2.11712	-2.0966	0.00800565	0.637366	0.668531	Yes
STFDHPELVKL	0.193424	STFDHLVKL	0.0296846	10.7614	HLA-A*02:01	-0.0205165	-1.52747	-1.50695	0.0311206	0.637366	0.668531	Yes
YAYDGKDYIAL	0.059379	YAYDGKIAL	0.0498683	10.7614	HLA-A*02:01	-0.0205165	-1.30218	-1.28166	0.0522807	0.637366	0.668531	Yes
GLWGHALLL	0.940552	GLWGHALLL	0.00409675	10.7614	HLA-A*02:01	-0.0205165	-2.38756	-2.36704	0.00429493	0.637366	0.668531	Yes
FLLDKKIGV	0.987284	FLLDKKIGV	0.00089406	10.7614	HLA-A*02:01	-0.0205165	-3.04863	-3.02812	0.00093731	0.637366	0.668531	Yes
YLDIKGLLDV	0.363734	YLIKGLLDV	0.020594	10.7614	HLA-A*02:01	-0.0205165	-1.68626	-1.66574	0.0215902	0.637366	0.668531	Yes
SLWHLPLLL	0.920385	SLWHLPLLL	0.00493264	10.7614	HLA-A*02:01	-0.0205165	-2.30692	-2.2864	0.00517125	0.637366	0.668531	Yes
HLLDFPNIVI	0.397597	HLLDFPIVI	0.0195224	10.7614	HLA-A*02:01	-0.0205165	-1.70947	-1.68895	0.0204667	0.637366	0.668531	Yes
YLQEVPILTL	0.908374	YLQEVPITL	0.00536436	10.7614	HLA-A*02:01	-0.0205165	-2.27048	-2.24997	0.00562386	0.637366	0.668531	Yes
ALFQHITAL	0.973463	ALFQHITAL	0.00214942	10.7614	HLA-A*02:01	-0.0205165	-2.66768	-2.64716	0.0022534	0.637366	0.668531	Yes
LLLAHIIAL	0.916502	LLLAHIIAL	0.00508573	10.7614	HLA-A*02:01	-0.0205165	-2.29365	-2.27313	0.00533175	0.637366	0.668531	Yes
KLGHTDILVGV	0.730686	KLTDILVGV	0.010643	10.7614	HLA-A*02:01	-0.0205165	-1.97294	-1.95242	0.0111578	0.637366	0.668531	Yes
ALFQRPPLI	0.84954	ALFQRPPLI	0.00741886	10.7614	HLA-A*02:01	-0.0205165	-2.12966	-2.10915	0.00777775	0.637366	0.668531	Yes
ALRDVSEEL	0.773156	ALRDVSEEL	0.00951623	10.7614	HLA-A*02:01	-0.0205165	-2.02154	-2.00102	0.00997657	0.637366	0.668531	Yes
LVDIIEKV	0.107925	-LVDIIEKV	0.0390692	10.7614	HLA-A*02:01	-0.0205165	-1.40817	-1.38765	0.0409592	0.637366	0.668531	Yes
TLLEEIRDLAL	0.692609	TLLEEILAL	0.0115064	10.7614	HLA-A*02:01	-0.0205165	-1.93906	-1.91854	0.012063	0.637366	0.668531	Yes
YLADLYHFV	0.99395	YLADLYHFV	0.000260257	10.7614	HLA-A*02:01	-0.0205165	-3.5846	-3.56408	0.000272847	0.637366	0.668531	Yes
VLFENTDSVHL	0.853652	VLFEDSVHL	0.00726883	10.7614	HLA-A*02:01	-0.0205165	-2.13854	-2.11802	0.00762046	0.637366	0.668531	Yes
SLFKLIVKV	0.974719	SLFKLIVKV	0.00204532	10.7614	HLA-A*02:01	-0.0205165	-2.68924	-2.66872	0.00214426	0.637366	0.668531	Yes
DTNADKQLSF	0.000202	DTADKQLSF	0.394039	10.7614	HLA-A*02:01	-0.0205165	-0.404461	-0.383945	0.4131	0.637366	0.668531	Yes
SLLESNKDLLL	0.705844	SLLESNLLL	0.0112247	10.7614	HLA-A*02:01	-0.0205165	-1.94982	-1.92931	0.0117677	0.637366	0.668531	Yes
GLDPQGDRSFL	0.165449	GLDPQGSFL	0.0320974	10.7614	HLA-A*02:01	-0.0205165	-1.49353	-1.47301	0.0336501	0.637366	0.668531	Yes
YLSDIPLHDA	0.672928	YLSDIPLHA	0.0120147	10.7614	HLA-A*02:01	-0.0205165	-1.92029	-1.89977	0.0125959	0.637366	0.668531	Yes
LLLKGVEAV	0.900695	LLLKGVEAV	0.00564911	10.7614	HLA-A*02:01	-0.0205165	-2.24802	-2.2275	0.00592239	0.637366	0.668531	Yes
MLEAIKALEV	0.04099	MLEAIKLEV	0.0575934	10.7614	HLA-A*02:01	-0.0205165	-1.23963	-1.21911	0.0603794	0.637366	0.668531	Yes
GLLGYLHFV	0.975415	GLLGYLHFV	0.00199633	10.7614	HLA-A*02:01	-0.0205165	-2.69977	-2.67925	0.0020929	0.637366	0.668531	Yes
FLIRESETL	0.886243	FLIRESETL	0.00613595	10.7614	HLA-A*02:01	-0.0205165	-2.21212	-2.1916	0.00643277	0.637366	0.668531	Yes
ALLDKLYAL	0.99057	ALLDKLYAL	0.000590937	10.7614	HLA-A*02:01	-0.0205165	-3.22846	-3.20794	0.000619523	0.637366	0.668531	Yes
VLMEKPDVVV	0.689746	VLMEKPVVV	0.0115769	10.7614	HLA-A*02:01	-0.0205165	-1.93641	-1.91589	0.0121369	0.637366	0.668531	Yes
ALMEQVAHQTI	0.678168	ALMEQVQTI	0.0119106	10.7614	HLA-A*02:01	-0.0205165	-1.92407	-1.90355	0.0124868	0.637366	0.668531	Yes
FINIVVHSV	0.822179	FINIVVHSV	0.00820269	10.7614	HLA-A*02:01	-0.0205165	-2.08604	-2.06553	0.0085995	0.637366	0.668531	Yes
FLWEYGDLHL	0.949105	FLWEGDLHL	0.00369259	10.7614	HLA-A*02:01	-0.0205165	-2.43267	-2.41215	0.00387122	0.637366	0.668531	Yes
YLLQEPPRTV	0.899686	YLLQEPPTV	0.00568892	10.7614	HLA-A*02:01	-0.0205165	-2.24497	-2.22445	0.00596412	0.637366	0.668531	Yes
SLLDEFYKL	0.986061	SLLDEFYKL	0.000982854	10.7614	HLA-A*02:01	-0.0205165	-3.00751	-2.98699	0.0010304	0.637366	0.668531	Yes
RLLILENILL	0.156908	RLLLENILL	0.0328781	10.7614	HLA-A*02:01	-0.0205165	-1.48309	-1.46258	0.0344686	0.637366	0.668531	Yes
GLIDVKPLGV	0.863993	GLIDVPLGV	0.00690753	10.7614	HLA-A*02:01	-0.0205165	-2.16068	-2.14016	0.00724168	0.637366	0.668531	Yes
TLWYRAPEVLL	0.259642	TLWAPEVLL	0.0254164	10.7614	HLA-A*02:01	-0.0205165	-1.59489	-1.57437	0.0266459	0.637366	0.668531	Yes
GLAPKPVQV	0.980611	GLAPKPVQV	0.0015493	10.7614	HLA-A*02:01	-0.0205165	-2.80987	-2.78935	0.00162424	0.637366	0.668531	Yes
YLNDLHEVLL	0.874337	YLNDHEVLL	0.00652174	10.7614	HLA-A*02:01	-0.0205165	-2.18564	-2.16512	0.00683723	0.637366	0.668531	Yes
FLWTEKFPSL	0.793431	FLWEKFPSL	0.00892223	10.7614	HLA-A*02:01	-0.0205165	-2.04953	-2.02901	0.00935384	0.637366	0.668531	Yes
YLLTHPPPIM	0.212007	YLLTPPPIM	0.0283558	10.7614	HLA-A*02:01	-0.0205165	-1.54736	-1.52684	0.0297275	0.637366	0.668531	Yes
TLLAAEFLKQV	0.415887	TLAEFLKQV	0.0188794	10.7614	HLA-A*02:01	-0.0205165	-1.72401	-1.7035	0.0197926	0.637366	0.668531	Yes
YLDEYIARM	0.979642	YLDEYIARM	0.00162584	10.7614	HLA-A*02:01	-0.0205165	-2.78892	-2.76841	0.00170449	0.637366	0.668531	Yes
ILLDDQFQPKL	0.847935	ILLDDQFQL	0.00747091	10.7614	HLA-A*02:01	-0.0205165	-2.12663	-2.10611	0.00783231	0.637366	0.668531	Yes
ALAAALAHI	0.708022	ALAAALAHI	0.0111788	10.7614	HLA-A*02:01	-0.0205165	-1.9516	-1.93109	0.0117196	0.637366	0.668531	Yes
FLFDIPKILDL	0.71979	FLFDKILDL	0.0108726	10.7614	HLA-A*02:01	-0.0205165	-1.96367	-1.94315	0.0113986	0.637366	0.668531	Yes
SLMDPNKFLLL	0.811072	SLMDPNLLL	0.00849357	10.7614	HLA-A*02:01	-0.0205165	-2.07091	-2.05039	0.00890444	0.637366	0.668531	Yes
LLFEGEKKITI	0.645987	LLFEGEITI	0.012673	10.7614	HLA-A*02:01	-0.0205165	-1.89712	-1.8766	0.013286	0.637366	0.668531	Yes
YQLEIPENFTT	0.035419	YQLEIPFTT	0.0611666	10.7614	HLA-A*02:01	-0.0205165	-1.21349	-1.19297	0.0641255	0.637366	0.668531	Yes
RMLPHAPGV	0.952872	RMLPHAPGV	0.00347826	10.7614	HLA-A*02:01	-0.0205165	-2.45864	-2.43812	0.00364652	0.637366	0.668531	Yes
ALANHLIKV	0.986496	ALANHLIKV	0.000961421	10.7614	HLA-A*02:01	-0.0205165	-3.01709	-2.99657	0.00100793	0.637366	0.668531	Yes
LLLEILHEI	0.985656	LLLEILHEI	0.00103491	10.7614	HLA-A*02:01	-0.0205165	-2.9851	-2.96458	0.00108497	0.637366	0.668531	Yes
TLWNQELYI	0.863009	TLWNQELYI	0.0069504	10.7614	HLA-A*02:01	-0.0205165	-2.15799	-2.13747	0.00728662	0.637366	0.668531	Yes
YLSPDLSKV	0.985745	YLSPDLSKV	0.00102266	10.7614	HLA-A*02:01	-0.0205165	-2.99027	-2.96975	0.00107213	0.637366	0.668531	Yes
ILLPEPSIRSV	0.771	ILLPEPSSV	0.00959584	10.7614	HLA-A*02:01	-0.0205165	-2.01792	-1.9974	0.01006	0.637366	0.668531	Yes
TLLGHEFVL	0.810536	TLLGHEFVL	0.00851194	10.7614	HLA-A*02:01	-0.0205165	-2.06997	-2.04945	0.0089237	0.637366	0.668531	Yes
ALLDRIVSV	0.9978	ALLDRIVSV	4.59277e-05	10.7614	HLA-A*02:01	-0.0205165	-4.33792	-4.31741	4.81495e-05	0.637366	0.668531	Yes
FLLDPYKYMTL	0.749967	FLLDPYMTL	0.0101715	10.7614	HLA-A*02:01	-0.0205165	-1.99262	-1.9721	0.0106635	0.637366	0.668531	Yes
KQMEQISQFL	0.557185	KQMEQIQFL	0.0148377	10.7614	HLA-A*02:01	-0.0205165	-1.82863	-1.80812	0.0155555	0.637366	0.668531	Yes
SLLPVDIRQYL	0.732717	SLLPVDIYL	0.0105879	10.7614	HLA-A*02:01	-0.0205165	-1.97519	-1.95467	0.0111001	0.637366	0.668531	Yes
KLADFGDAVQL	0.886028	KLFGDAVQL	0.00613901	10.7614	HLA-A*02:01	-0.0205165	-2.2119	-2.19139	0.00643598	0.637366	0.668531	Yes
YLAELVTPIL	0.663662	YLAEVTPIL	0.0122566	10.7614	HLA-A*02:01	-0.0205165	-1.91163	-1.89111	0.0128495	0.637366	0.668531	Yes
YLSHNGIEVI	0.175442	YLHNGIEVI	0.0311758	10.7614	HLA-A*02:01	-0.0205165	-1.50618	-1.48567	0.0326839	0.637366	0.668531	Yes
RLSPVSPAL	0.941088	RLSPVSPAL	0.00408145	10.7614	HLA-A*02:01	-0.0205165	-2.38919	-2.36867	0.00427888	0.637366	0.668531	Yes
YLSEDVFQHAV	0.900259	YLSEDVFQV	0.00567361	10.7614	HLA-A*02:01	-0.0205165	-2.24614	-2.22562	0.00594807	0.637366	0.668531	Yes
ALFEQKGPVYV	0.976845	ALFEGPVYV	0.00185548	10.7614	HLA-A*02:01	-0.0205165	-2.73154	-2.71103	0.00194524	0.637366	0.668531	Yes
YLLPAIVHI	0.988341	YLLPAIVHI	0.000808328	10.7614	HLA-A*02:01	-0.0205165	-3.09241	-3.0719	0.000847431	0.637366	0.668531	Yes
YLPDIIKDQKA	0.572954	YLPDIIQKA	0.0144917	10.7614	HLA-A*02:01	-0.0205165	-1.83888	-1.81836	0.0151928	0.637366	0.668531	Yes
SLLDIIEKV	0.995585	SLLDIIEKV	0.000150031	10.7614	HLA-A*02:01	-0.0205165	-3.82382	-3.8033	0.000157288	0.637366	0.668531	Yes
YLKDLIEEV	0.990821	YLKDLIEEV	0.00056338	10.7614	HLA-A*02:01	-0.0205165	-3.2492	-3.22868	0.000590634	0.637366	0.668531	Yes
FLSEHPNVTL	0.929724	FLSEPNVTL	0.00460808	10.7614	HLA-A*02:01	-0.0205165	-2.33648	-2.31596	0.004831	0.637366	0.668531	Yes
GLAPHLEQI	0.957455	GLAPHLEQI	0.00316901	10.7614	HLA-A*02:01	-0.0205165	-2.49908	-2.47856	0.00332231	0.637366	0.668531	Yes
TLYNPERTITV	0.713962	TLYNPTITV	0.0110196	10.7614	HLA-A*02:01	-0.0205165	-1.95783	-1.93732	0.0115527	0.637366	0.668531	Yes
SLVEIILHV	0.991462	SLVEIILHV	0.000508267	10.7614	HLA-A*02:01	-0.0205165	-3.29391	-3.27339	0.000532854	0.637366	0.668531	Yes
RLYPWGVVEV	0.95979	RLYPGVVEV	0.00303735	10.7614	HLA-A*02:01	-0.0205165	-2.5175	-2.49699	0.00318429	0.637366	0.668531	Yes
GLLAKIFEL	0.97508	GLLAKIFEL	0.00202082	10.7614	HLA-A*02:01	-0.0205165	-2.69447	-2.67396	0.00211858	0.637366	0.668531	Yes
YLLQRAVEV	0.97663	YLLQRAVEV	0.00187385	10.7614	HLA-A*02:01	-0.0205165	-2.72726	-2.70675	0.0019645	0.637366	0.668531	Yes
ILYGKIIHL	0.991295	ILYGKIIHL	0.000526638	10.7614	HLA-A*02:01	-0.0205165	-3.27849	-3.25797	0.000552114	0.637366	0.668531	Yes
YLHSQVVSV	0.993373	YLHSQVVSV	0.000321494	10.7614	HLA-A*02:01	-0.0205165	-3.49283	-3.47231	0.000337046	0.637366	0.668531	Yes
YIFPLDDKAAV	0.340166	YIFDDKAAV	0.0216258	10.7614	HLA-A*02:01	-0.0205165	-1.66503	-1.64451	0.022672	0.637366	0.668531	Yes
SLAPLFFKL	0.966509	SLAPLFFKL	0.00259032	10.7614	HLA-A*02:01	-0.0205165	-2.58665	-2.56613	0.00271563	0.637366	0.668531	Yes
KLLDISELDMV	0.777387	KLLDISELV	0.00939375	10.7614	HLA-A*02:01	-0.0205165	-2.02716	-2.00664	0.00984817	0.637366	0.668531	Yes
RLLENMTEVV	0.735669	RLLENMTEV	0.0105205	10.7614	HLA-A*02:01	-0.0205165	-1.97796	-1.95745	0.0110294	0.637366	0.668531	Yes
VLFEKEVNEV	0.907956	VLFEEVNEV	0.00538273	10.7614	HLA-A*02:01	-0.0205165	-2.269	-2.24848	0.00564312	0.637366	0.668531	Yes
LLFEGEKITI	0.662143	LLFEGEITI	0.0123025	10.7614	HLA-A*02:01	-0.0205165	-1.91001	-1.88949	0.0128976	0.637366	0.668531	Yes
GVIDGHIYAV	0.659315	GVIDGIYAV	0.0123576	10.7614	HLA-A*02:01	-0.0205165	-1.90807	-1.88755	0.0129554	0.637366	0.668531	Yes
FIWKSGGDLTL	0.432656	FIWGGDLTL	0.0183711	10.7614	HLA-A*02:01	-0.0205165	-1.73586	-1.71535	0.0192598	0.637366	0.668531	Yes
ALATLIHQV	0.990318	ALATLIHQV	0.000609308	10.7614	HLA-A*02:01	-0.0205165	-3.21516	-3.19465	0.000638783	0.637366	0.668531	Yes
SLWSLTHLTAL	0.498291	SLWSHLTAL	0.0164942	10.7614	HLA-A*02:01	-0.0205165	-1.78267	-1.76215	0.0172921	0.637366	0.668531	Yes
KLGDFGLLVEL	0.615788	KLFGLLVEL	0.0133466	10.7614	HLA-A*02:01	-0.0205165	-1.87463	-1.85411	0.0139922	0.637366	0.668531	Yes
KLLFWVTEV	0.94688	KLLFWVTEV	0.00378138	10.7614	HLA-A*02:01	-0.0205165	-2.42235	-2.40183	0.00396431	0.637366	0.668531	Yes
ALAEIAKAEL	0.577826	ALAEIAAEL	0.0143938	10.7614	HLA-A*02:01	-0.0205165	-1.84183	-1.82131	0.01509	0.637366	0.668531	Yes
FLLPHPGLKV	0.925195	FLLPHPLKV	0.00478261	10.7614	HLA-A*02:01	-0.0205165	-2.32034	-2.29982	0.00501397	0.637366	0.668531	Yes
KLWEFFQVDV	0.587795	KLWEFQVDV	0.0141366	10.7614	HLA-A*02:01	-0.0205165	-1.84966	-1.82914	0.0148204	0.637366	0.668531	Yes
VLADLKVQL	0.95737	VLADLKVQL	0.0031782	10.7614	HLA-A*02:01	-0.0205165	-2.49782	-2.4773	0.00333194	0.637366	0.668531	Yes
RLYSGISGLEL	0.79609	RLYSGILEL	0.00886099	10.7614	HLA-A*02:01	-0.0205165	-2.05252	-2.032	0.00928964	0.637366	0.668531	Yes
FLDPNNIPKA	0.790915	FLDPNIPKA	0.00898653	10.7614	HLA-A*02:01	-0.0205165	-2.04641	-2.02589	0.00942125	0.637366	0.668531	Yes
HLINYIIFL	0.933243	HLINYIIFL	0.00444274	10.7614	HLA-A*02:01	-0.0205165	-2.35235	-2.33183	0.00465766	0.637366	0.668531	Yes
GVAESIHLWEV	0.549374	GVAESIWEV	0.0150704	10.7614	HLA-A*02:01	-0.0205165	-1.82187	-1.80136	0.0157994	0.637366	0.668531	Yes
FLLDPYKYMTL	0.749967	FLLDPYMTL	0.0101745	10.7614	HLA-A*02:01	-0.0205165	-1.99249	-1.97197	0.0106667	0.637366	0.668531	Yes
GLYEFPLNKV	0.90887	GLYEFPLKV	0.00535211	10.7614	HLA-A*02:01	-0.0205165	-2.27147	-2.25096	0.00561102	0.637366	0.668531	Yes
ILEEGKEILV	0.30314	ILEEGEILV	0.0232884	10.7614	HLA-A*02:01	-0.0205165	-1.63286	-1.61234	0.024415	0.637366	0.668531	Yes
VLLGKVYVV	0.961541	VLLGKVYVV	0.00292407	10.7614	HLA-A*02:01	-0.0205165	-2.53401	-2.5135	0.00306552	0.637366	0.668531	Yes
KLWTGGLDNTV	0.740557	KLWTGGLTV	0.0104042	10.7614	HLA-A*02:01	-0.0205165	-1.98279	-1.96228	0.0109075	0.637366	0.668531	Yes
VLLHVSVLL	0.747636	VLLHVSVLL	0.0102327	10.7614	HLA-A*02:01	-0.0205165	-1.99001	-1.96949	0.0107277	0.637366	0.668531	Yes
ALDKATVLL	0.875722	ALDKATVLL	0.00648194	10.7614	HLA-A*02:01	-0.0205165	-2.1883	-2.16778	0.0067955	0.637366	0.668531	Yes
FLYPFLHTV	0.998023	FLYPFLHTV	3.36803e-05	10.7614	HLA-A*02:01	-0.0205165	-4.47262	-4.45211	3.53096e-05	0.637366	0.668531	Yes
KLKPGDLVGV	0.651528	KLKPDLVGV	0.0125444	10.7614	HLA-A*02:01	-0.0205165	-1.90155	-1.88103	0.0131512	0.637366	0.668531	Yes
FLLPHPGLQV	0.955093	FLLPHPLQV	0.00332517	10.7614	HLA-A*02:01	-0.0205165	-2.47819	-2.45767	0.00348602	0.637366	0.668531	Yes
FLDDVVHSL	0.999618	FLDDVVHSL	3.06185e-06	10.7614	HLA-A*02:01	-0.0205165	-5.51402	-5.4935	3.20997e-06	0.637366	0.668531	Yes
FLHDHVDLQV	0.932374	FLHDHVLQV	0.0044703	10.7614	HLA-A*02:01	-0.0205165	-2.34966	-2.32915	0.00468655	0.637366	0.668531	Yes
SIQQSIERLLV	0.018465	SIQQSILLV	0.0784997	10.7614	HLA-A*02:01	-0.0205165	-1.10513	-1.08462	0.0822971	0.637366	0.668531	Yes
SLLEDKGLAEV	0.910272	SLLEGLAEV	0.00530618	10.7614	HLA-A*02:01	-0.0205165	-2.27522	-2.2547	0.00556287	0.637366	0.668531	Yes
ILDKKVEKV	0.958516	ILDKKVEKV	0.00312921	10.7614	HLA-A*02:01	-0.0205165	-2.50457	-2.48405	0.00328058	0.637366	0.668531	Yes
HIIENIVAV	0.95306	HIIENIVAV	0.00345989	10.7614	HLA-A*02:01	-0.0205165	-2.46094	-2.44042	0.00362726	0.637366	0.668531	Yes
VLGGKAFLEHL	0.064399	VLGGFLEHL	0.0483711	10.7614	HLA-A*02:01	-0.0205165	-1.31541	-1.2949	0.050711	0.637366	0.668531	Yes
YLADIFTKL	0.994597	YLADIFTKL	0.000214329	10.7614	HLA-A*02:01	-0.0205165	-3.66892	-3.6484	0.000224698	0.637366	0.668531	Yes
IVMEHVVFL	0.953221	IVMEHVVFL	0.00344764	10.7614	HLA-A*02:01	-0.0205165	-2.46248	-2.44196	0.00361442	0.637366	0.668531	Yes
YLDLFGDPSV	0.654997	YLDFGDPSV	0.0124525	10.7614	HLA-A*02:01	-0.0205165	-1.90474	-1.88423	0.0130549	0.637366	0.668531	Yes
SLLPPDALVGL	0.819048	SLLDALVGL	0.00829455	10.7614	HLA-A*02:01	-0.0205165	-2.08121	-2.06069	0.0086958	0.637366	0.668531	Yes
YIYDKDMEII	0.446036	YIYDKDMEI	0.0179455	10.7614	HLA-A*02:01	-0.0205165	-1.74604	-1.72553	0.0188136	0.637366	0.668531	Yes
KMLDEILLQL	0.938048	KMLDEILQL	0.0041978	10.7614	HLA-A*02:01	-0.0205165	-2.37698	-2.35646	0.00440086	0.637366	0.668531	Yes
FLEKLLPPV	0.744207	FLEKLLPPV	0.0103062	10.7614	HLA-A*02:01	-0.0205165	-1.9869	-1.96639	0.0108047	0.637366	0.668531	Yes
KLFDRPQELKL	0.886424	KLFDQELKL	0.00612982	10.7614	HLA-A*02:01	-0.0205165	-2.21255	-2.19204	0.00642635	0.637366	0.668531	Yes
ILQQHIATV	0.955043	ILQQHIATV	0.00333129	10.7614	HLA-A*02:01	-0.0205165	-2.47739	-2.45687	0.00349244	0.637366	0.668531	Yes
VLQDIQVML	0.94816	VLQDIQVML	0.00373546	10.7614	HLA-A*02:01	-0.0205165	-2.42766	-2.40714	0.00391616	0.637366	0.668531	Yes
LLFDRPMHV	0.992936	LLFDRPMHV	0.000355175	10.7614	HLA-A*02:01	-0.0205165	-3.44956	-3.42904	0.000372356	0.637366	0.668531	Yes
SMTLAIHEI	0.427705	SMTLAIHEI	0.0185242	10.7614	HLA-A*02:01	-0.0205165	-1.73226	-1.71174	0.0194203	0.637366	0.668531	Yes
ALSNLEVKL	0.851359	ALSNLEVKL	0.00736681	10.7614	HLA-A*02:01	-0.0205165	-2.13272	-2.1122	0.00772318	0.637366	0.668531	Yes
SLLYNVPAV	0.921153	SLLYNVPAV	0.00489896	10.7614	HLA-A*02:01	-0.0205165	-2.3099	-2.28938	0.00513594	0.637366	0.668531	Yes
FLLPLLIEKV	0.732847	FLLPLLIEV	0.0105818	10.7614	HLA-A*02:01	-0.0205165	-1.97544	-1.95493	0.0110936	0.637366	0.668531	Yes
ALVDHLNVGV	0.853585	ALVDHLVGV	0.0072872	10.7614	HLA-A*02:01	-0.0205165	-2.13744	-2.11692	0.00763972	0.637366	0.668531	Yes
ALADFAELI	0.804178	ALADFAELI	0.00866197	10.7614	HLA-A*02:01	-0.0205165	-2.06238	-2.04187	0.00908099	0.637366	0.668531	Yes
AMFDHIPVGV	0.941484	AMFDHPVGV	0.00405083	10.7614	HLA-A*02:01	-0.0205165	-2.39246	-2.37194	0.00424678	0.637366	0.668531	Yes
ILIDWLVQV	0.995984	ILIDWLVQV	0.000125536	10.7614	HLA-A*02:01	-0.0205165	-3.90123	-3.88072	0.000131609	0.637366	0.668531	Yes
YLLPKDQGITL	0.902225	YLLDQGITL	0.005594	10.7614	HLA-A*02:01	-0.0205165	-2.25228	-2.23176	0.00586461	0.637366	0.668531	Yes
YLSVKIWDL	0.740224	YLSVKIWDL	0.0104133	10.7614	HLA-A*02:01	-0.0205165	-1.98241	-1.96189	0.0109171	0.637366	0.668531	Yes
FVHDLVLYL	0.934055	FVHDLVLYL	0.00439988	10.7614	HLA-A*02:01	-0.0205165	-2.35656	-2.33604	0.00461272	0.637366	0.668531	Yes
FVLPELPSV	0.990709	FVLPELPSV	0.000584813	10.7614	HLA-A*02:01	-0.0205165	-3.23298	-3.21247	0.000613103	0.637366	0.668531	Yes
RLSEFIPAVF	0.251694	RLSEFIPAV	0.0258665	10.7614	HLA-A*02:01	-0.0205165	-1.58726	-1.56675	0.0271178	0.637366	0.668531	Yes
RLMNLPLHSV	0.822179	RLMNPLHSV	0.00820576	10.7614	HLA-A*02:01	-0.0205165	-2.08588	-2.06536	0.00860271	0.637366	0.668531	Yes
ALYSKGILL	0.829218	ALYSKGILL	0.00805573	10.7614	HLA-A*02:01	-0.0205165	-2.0939	-2.07338	0.00844542	0.637366	0.668531	Yes
KMDDPDYWRTV	0.613477	KMDDPDYTV	0.0134078	10.7614	HLA-A*02:01	-0.0205165	-1.87264	-1.85212	0.0140564	0.637366	0.668531	Yes
YLDQRELLL	0.937401	YLDQRELLL	0.00422229	10.7614	HLA-A*02:01	-0.0205165	-2.37445	-2.35394	0.00442654	0.637366	0.668531	Yes
ALADLQEAVKL	0.68296	ALADLQVKL	0.0117667	10.7614	HLA-A*02:01	-0.0205165	-1.92935	-1.90883	0.0123359	0.637366	0.668531	Yes
FLFDHLLTL	0.997255	FLFDHLLTL	6.73607e-05	10.7614	HLA-A*02:01	-0.0205165	-4.17159	-4.15108	7.06192e-05	0.637366	0.668531	Yes
ALWGFFPVLL	0.615713	ALWGFPVLL	0.0133497	10.7614	HLA-A*02:01	-0.0205165	-1.87453	-1.85401	0.0139954	0.637366	0.668531	Yes
GMYIFLHTV	0.789595	GMYIFLHTV	0.00901408	10.7614	HLA-A*02:01	-0.0205165	-2.04508	-2.02456	0.00945014	0.637366	0.668531	Yes
TLYDIAHTPGV	0.810738	TLYDHTPGV	0.00850888	10.7614	HLA-A*02:01	-0.0205165	-2.07013	-2.04961	0.00892049	0.637366	0.668531	Yes
GIFGGHIRSV	0.444731	GIFGGHISV	0.0179914	10.7614	HLA-A*02:01	-0.0205165	-1.74493	-1.72442	0.0188618	0.637366	0.668531	Yes
HLMEENMIVYV	0.898534	HLMEEIVYV	0.00572566	10.7614	HLA-A*02:01	-0.0205165	-2.24217	-2.22166	0.00600263	0.637366	0.668531	Yes
VVAEFVPLI	0.758897	VVAEFVPLI	0.00992958	10.7614	HLA-A*02:01	-0.0205165	-2.00307	-1.98255	0.0104099	0.637366	0.668531	Yes
LLLEPGSLYIL	0.250328	LLLEPGSLL	0.0259584	10.7614	HLA-A*02:01	-0.0205165	-1.58572	-1.56521	0.0272141	0.637366	0.668531	Yes
ILHDDEVTV	0.961621	ILHDDEVTV	0.002921	10.7614	HLA-A*02:01	-0.0205165	-2.53447	-2.51395	0.00306231	0.637366	0.668531	Yes
ILAELLLRV	0.984823	ILAELLLRV	0.00112676	10.7614	HLA-A*02:01	-0.0205165	-2.94817	-2.92765	0.00118127	0.637366	0.668531	Yes
TLADLVHHV	0.994824	TLADLVHHV	0.000202082	10.7614	HLA-A*02:01	-0.0205165	-3.69447	-3.67396	0.000211858	0.637366	0.668531	Yes
RLLEQLQEI	0.985395	RLLEQLQEI	0.00105021	10.7614	HLA-A*02:01	-0.0205165	-2.97872	-2.95821	0.00110102	0.637366	0.668531	Yes
SLYDQAEKLVS	0.083497	SLYDQAEKV	0.0435579	10.7614	HLA-A*02:01	-0.0205165	-1.36093	-1.34042	0.045665	0.637366	0.668531	Yes
RLPEIYIQL	0.955715	RLPEIYIQL	0.00330067	10.7614	HLA-A*02:01	-0.0205165	-2.4814	-2.46088	0.00346034	0.637366	0.668531	Yes
GLIEKNIEL	0.978441	GLIEKNIEL	0.00171464	10.7614	HLA-A*02:01	-0.0205165	-2.76583	-2.74531	0.00179758	0.637366	0.668531	Yes
ALSKEGIVAL	0.76366	ALSEGIVAL	0.00981935	10.7614	HLA-A*02:01	-0.0205165	-2.00792	-1.9874	0.0102944	0.637366	0.668531	Yes
FLVTVIHTL	0.973895	FLVTVIHTL	0.00212492	10.7614	HLA-A*02:01	-0.0205165	-2.67266	-2.65214	0.00222772	0.637366	0.668531	Yes
FLLGPEGQHLL	0.92854	FLLEGQHLL	0.00464176	10.7614	HLA-A*02:01	-0.0205165	-2.33332	-2.3128	0.00486631	0.637366	0.668531	Yes
KILQELPSV	0.970051	KILQELPSV	0.00237906	10.7614	HLA-A*02:01	-0.0205165	-2.6236	-2.60308	0.00249414	0.637366	0.668531	Yes
YALNHTLSV	0.629716	YALNHTLSV	0.0130129	10.7614	HLA-A*02:01	-0.0205165	-1.88563	-1.86511	0.0136424	0.637366	0.668531	Yes
YLTAEILEL	0.957268	YLTAEILEL	0.00319351	10.7614	HLA-A*02:01	-0.0205165	-2.49573	-2.47522	0.00334799	0.637366	0.668531	Yes
SLFPHNPQFI	0.75702	SLFPHPQFI	0.00998469	10.7614	HLA-A*02:01	-0.0205165	-2.00067	-1.98015	0.0104677	0.637366	0.668531	Yes
KLLEGQVIQL	0.968641	KLLEGVIQL	0.00243723	10.7614	HLA-A*02:01	-0.0205165	-2.6131	-2.59259	0.00255513	0.637366	0.668531	Yes
FLWDVPSNWTL	0.902104	FLWDVPSTL	0.00559706	10.7614	HLA-A*02:01	-0.0205165	-2.25204	-2.23152	0.00586782	0.637366	0.668531	Yes
TLWYVPLSL	0.819834	TLWYVPLSL	0.00827618	10.7614	HLA-A*02:01	-0.0205165	-2.08217	-2.06165	0.00867654	0.637366	0.668531	Yes
AIMDIVIKV	0.992758	AIMDIVIKV	0.000373546	10.7614	HLA-A*02:01	-0.0205165	-3.42766	-3.40714	0.000391616	0.637366	0.668531	Yes
VLLFEADTITL	0.406958	VLLADTITL	0.0192131	10.7614	HLA-A*02:01	-0.0205165	-1.7164	-1.69589	0.0201425	0.637366	0.668531	Yes
LLAELREYNL	0.237567	LLAELEYNL	0.0267851	10.7614	HLA-A*02:01	-0.0205165	-1.57211	-1.55159	0.0280808	0.637366	0.668531	Yes
TLQEFLERI	0.828842	TLQEFLERI	0.00806185	10.7614	HLA-A*02:01	-0.0205165	-2.09357	-2.07305	0.00845184	0.637366	0.668531	Yes
FLFGEEPSKL	0.893727	FLFEEPSKL	0.00589406	10.7614	HLA-A*02:01	-0.0205165	-2.22959	-2.20907	0.00617918	0.637366	0.668531	Yes
SLSEKTVLL	0.946258	SLSEKTVLL	0.00382119	10.7614	HLA-A*02:01	-0.0205165	-2.4178	-2.39729	0.00400604	0.637366	0.668531	Yes
FLWDEGFHQL	0.989096	FLDEGFHQL	0.000737906	10.7614	HLA-A*02:01	-0.0205165	-3.132	-3.11148	0.000773602	0.637366	0.668531	Yes
SIIGRLLEV	0.953206	SIIGRLLEV	0.0034507	10.7614	HLA-A*02:01	-0.0205165	-2.46209	-2.44158	0.00361763	0.637366	0.668531	Yes
KLIDLSQVMYL	0.932874	KLIDQVMYL	0.00446111	10.7614	HLA-A*02:01	-0.0205165	-2.35056	-2.33004	0.00467692	0.637366	0.668531	Yes
FQDPVPLTV	0.983454	FQDPVPLTV	0.00126454	10.7614	HLA-A*02:01	-0.0205165	-2.89807	-2.87755	0.00132572	0.637366	0.668531	Yes
SLIRNLEQL	0.848487	SLIRNLEQL	0.00744948	10.7614	HLA-A*02:01	-0.0205165	-2.12787	-2.10736	0.00780985	0.637366	0.668531	Yes
LLYHYWIAV	0.415983	LLYHYWIAV	0.0188732	10.7614	HLA-A*02:01	-0.0205165	-1.72415	-1.70364	0.0197862	0.637366	0.668531	Yes
SLAEFVQSL	0.993037	SLAEFVQSL	0.000345989	10.7614	HLA-A*02:01	-0.0205165	-3.46094	-3.44042	0.000362726	0.637366	0.668531	Yes
KILDYEVTL	0.907753	KILDYEVTL	0.00539192	10.7614	HLA-A*02:01	-0.0205165	-2.26826	-2.24774	0.00565275	0.637366	0.668531	Yes
LDDLKVEL	0.031796	-LDDLKVEL	0.0639773	10.7614	HLA-A*02:01	-0.0205165	-1.19397	-1.17346	0.0670722	0.637366	0.668531	Yes
AIVRSLPSV	0.752835	AIVRSLPSV	0.0100949	10.7614	HLA-A*02:01	-0.0205165	-1.9959	-1.97538	0.0105833	0.637366	0.668531	Yes
ALLEDSCHYL	0.88318	ALLEDSHYL	0.00621862	10.7614	HLA-A*02:01	-0.0205165	-2.20631	-2.18579	0.00651944	0.637366	0.668531	Yes
MLFGHPLLV	0.977772	MLFGHPLLV	0.00176363	10.7614	HLA-A*02:01	-0.0205165	-2.75359	-2.73308	0.00184894	0.637366	0.668531	Yes
FLYPFPLAL	0.992975	FLYPFPLAL	0.000352113	10.7614	HLA-A*02:01	-0.0205165	-3.45332	-3.4328	0.000369146	0.637366	0.668531	Yes
SLLDGHFVL	0.946226	SLLDGHFVL	0.00382425	10.7614	HLA-A*02:01	-0.0205165	-2.41745	-2.39694	0.00400925	0.637366	0.668531	Yes
GLADASLLKKV	0.593163	GLADASLKV	0.0139835	10.7614	HLA-A*02:01	-0.0205165	-1.85439	-1.83387	0.0146599	0.637366	0.668531	Yes
GLIDRQVTV	0.984071	GLIDRQVTV	0.00120637	10.7614	HLA-A*02:01	-0.0205165	-2.91852	-2.898	0.00126473	0.637366	0.668531	Yes
ALLSRLEQI	0.90104	ALLSRLEQI	0.00563993	10.7614	HLA-A*02:01	-0.0205165	-2.24873	-2.22821	0.00591276	0.637366	0.668531	Yes
FLIEEQKIVV	0.73247	FLIEEQIVV	0.0106032	10.7614	HLA-A*02:01	-0.0205165	-1.97456	-1.95405	0.0111161	0.637366	0.668531	Yes
RLWDHATMTEV	0.917934	RLWDHMTEV	0.00504899	10.7614	HLA-A*02:01	-0.0205165	-2.2968	-2.27628	0.00529323	0.637366	0.668531	Yes
LLHSFVDSV	0.796401	LLHSFVDSV	0.00885487	10.7614	HLA-A*02:01	-0.0205165	-2.05282	-2.0323	0.00928322	0.637366	0.668531	Yes
RLLPQVDSV	0.972251	RLLPQVDSV	0.00220147	10.7614	HLA-A*02:01	-0.0205165	-2.65729	-2.63677	0.00230796	0.637366	0.668531	Yes
KLFPGFEIETV	0.954989	KLFPGIETV	0.00333742	10.7614	HLA-A*02:01	-0.0205165	-2.47659	-2.45607	0.00349886	0.637366	0.668531	Yes
KLFGMIITI	0.941756	KLFGMIITI	0.00402327	10.7614	HLA-A*02:01	-0.0205165	-2.39542	-2.3749	0.00421789	0.637366	0.668531	Yes
NLLPKLHIV	0.960896	NLLPKLHIV	0.00295775	10.7614	HLA-A*02:01	-0.0205165	-2.52904	-2.50852	0.00310083	0.637366	0.668531	Yes
RVMEELPLMLL	0.436633	RVMEELPLL	0.0182241	10.7614	HLA-A*02:01	-0.0205165	-1.73935	-1.71884	0.0191057	0.637366	0.668531	Yes
LLPEGPPAI	0.916558	LLPEGPPAI	0.00508267	10.7614	HLA-A*02:01	-0.0205165	-2.29391	-2.27339	0.00532854	0.637366	0.668531	Yes
SLIRIVPVV	0.87876	SLIRIVPVV	0.00639314	10.7614	HLA-A*02:01	-0.0205165	-2.19429	-2.17377	0.00670241	0.637366	0.668531	Yes
YLWEHIFEGL	0.913711	YLWEHIFEL	0.00518371	10.7614	HLA-A*02:01	-0.0205165	-2.28536	-2.26484	0.00543447	0.637366	0.668531	Yes
ALHDQLFYL	0.991306	ALHDQLFYL	0.000523576	10.7614	HLA-A*02:01	-0.0205165	-3.28102	-3.2605	0.000548904	0.637366	0.668531	Yes
FIWENIHTL	0.991707	FIWENIHTL	0.00049602	10.7614	HLA-A*02:01	-0.0205165	-3.3045	-3.28398	0.000520014	0.637366	0.668531	Yes
TLVYHVVGV	0.765681	TLVYHVVGV	0.00976424	10.7614	HLA-A*02:01	-0.0205165	-2.01036	-1.98985	0.0102366	0.637366	0.668531	Yes
GLMEDLLKL	0.986545	GLMEDLLKL	0.000955297	10.7614	HLA-A*02:01	-0.0205165	-3.01986	-2.99935	0.00100151	0.637366	0.668531	Yes
KLLEVQILEV	0.941914	KLLEQILEV	0.00401408	10.7614	HLA-A*02:01	-0.0205165	-2.39641	-2.3759	0.00420826	0.637366	0.668531	Yes
SLYREILFL	0.910883	SLYREILFL	0.00528475	10.7614	HLA-A*02:01	-0.0205165	-2.27698	-2.25646	0.0055404	0.637366	0.668531	Yes
ALVDQRELYL	0.597881	ALVDQELYL	0.0138641	10.7614	HLA-A*02:01	-0.0205165	-1.85811	-1.83759	0.0145347	0.637366	0.668531	Yes
VLMDRLPSL	0.991882	VLMDRLPSL	0.000483772	10.7614	HLA-A*02:01	-0.0205165	-3.31536	-3.29484	0.000507174	0.637366	0.668531	Yes
GLTSTDLLFHL	0.434656	GLTDLLFHL	0.0183068	10.7614	HLA-A*02:01	-0.0205165	-1.73739	-1.71687	0.0191924	0.637366	0.668531	Yes
SLLQTLYKV	0.971461	SLLQTLYKV	0.00225046	10.7614	HLA-A*02:01	-0.0205165	-2.64773	-2.62721	0.00235932	0.637366	0.668531	Yes
GLKEGIPAL	0.950379	GLKEGIPAL	0.00360686	10.7614	HLA-A*02:01	-0.0205165	-2.44287	-2.42235	0.00378134	0.637366	0.668531	Yes
FLDPGGPMMKL	0.920009	FLDPGGPML	0.00495101	10.7614	HLA-A*02:01	-0.0205165	-2.30531	-2.28479	0.00519051	0.637366	0.668531	Yes
KIWDLKERTNV	0.315704	KIWDERTNV	0.0227067	10.7614	HLA-A*02:01	-0.0205165	-1.64385	-1.62333	0.0238051	0.637366	0.668531	Yes
FLIGPKLYEA	0.796426	FLIPKLYEA	0.00884874	10.7614	HLA-A*02:01	-0.0205165	-2.05312	-2.0326	0.0092768	0.637366	0.668531	Yes
LLYQEGAKMAV	0.169632	LLYQEGMAV	0.0317299	10.7614	HLA-A*02:01	-0.0205165	-1.49853	-1.47801	0.0332649	0.637366	0.668531	Yes
ILVDWLVQV	0.991874	ILVDWLVQV	0.000486834	10.7614	HLA-A*02:01	-0.0205165	-3.31262	-3.2921	0.000510384	0.637366	0.668531	Yes
VLQRSLVTV	0.841699	VLQRSLVTV	0.00763013	10.7614	HLA-A*02:01	-0.0205165	-2.11747	-2.09695	0.00799923	0.637366	0.668531	Yes
LLAEKIYKI	0.974613	LLAEKIYKI	0.00205144	10.7614	HLA-A*02:01	-0.0205165	-2.68794	-2.66742	0.00215068	0.637366	0.668531	Yes
YMLEHVITL	0.997909	YMLEHVITL	3.9804e-05	10.7614	HLA-A*02:01	-0.0205165	-4.40007	-4.37956	4.17295e-05	0.637366	0.668531	Yes
SLAELVHAV	0.995768	SLAELVHAV	0.00013166	10.7614	HLA-A*02:01	-0.0205165	-3.88055	-3.86003	0.000138029	0.637366	0.668531	Yes
VIDGHIYAV	0.963385	VIDGHIYAV	0.00280159	10.7614	HLA-A*02:01	-0.0205165	-2.5526	-2.53208	0.00293712	0.637366	0.668531	Yes
ILDEVIFKL	0.997015	ILDEVIFKL	7.34844e-05	10.7614	HLA-A*02:01	-0.0205165	-4.1338	-4.11329	7.70392e-05	0.637366	0.668531	Yes
SLIDMRGIETV	0.954693	SLIDGIETV	0.00336191	10.7614	HLA-A*02:01	-0.0205165	-2.47341	-2.4529	0.00352454	0.637366	0.668531	Yes
FLFDTQHFI	0.990945	FLFDTQHFI	0.000560318	10.7614	HLA-A*02:01	-0.0205165	-3.25157	-3.23105	0.000587424	0.637366	0.668531	Yes
VLMDLKALLL	0.603577	VLMDLKLLL	0.013711	10.7614	HLA-A*02:01	-0.0205165	-1.86293	-1.84242	0.0143742	0.637366	0.668531	Yes
ALIEAEKVAQV	0.796746	ALIEAVAQV	0.00883956	10.7614	HLA-A*02:01	-0.0205165	-2.05357	-2.03305	0.00926717	0.637366	0.668531	Yes
YVVPFVAKV	0.93956	YVVPFVAKV	0.00415187	10.7614	HLA-A*02:01	-0.0205165	-2.38176	-2.36124	0.00435271	0.637366	0.668531	Yes
SLYIKDIWL	0.557404	SLYIKDIWL	0.0148255	10.7614	HLA-A*02:01	-0.0205165	-1.82899	-1.80847	0.0155427	0.637366	0.668531	Yes
VLAYFLPEA	0.706507	VLAYFLPEA	0.0112094	10.7614	HLA-A*02:01	-0.0205165	-1.95042	-1.9299	0.0117517	0.637366	0.668531	Yes
LLFDSVIHL	0.989614	LLFDSVIHL	0.000682792	10.7614	HLA-A*02:01	-0.0205165	-3.16571	-3.14519	0.000715822	0.637366	0.668531	Yes
KLADDVDLEQV	0.864054	KLADDLEQV	0.00689835	10.7614	HLA-A*02:01	-0.0205165	-2.16125	-2.14074	0.00723205	0.637366	0.668531	Yes
YMDQWVPVI	0.843946	YMDQWVPVI	0.00756583	10.7614	HLA-A*02:01	-0.0205165	-2.12114	-2.10063	0.00793182	0.637366	0.668531	Yes
KLAEALPSL	0.991063	KLAEALPSL	0.000545009	10.7614	HLA-A*02:01	-0.0205165	-3.2636	-3.24308	0.000571374	0.637366	0.668531	Yes
YLIPDIDLKL	0.917058	YLIPDILKL	0.00507348	10.7614	HLA-A*02:01	-0.0205165	-2.29469	-2.27418	0.00531891	0.637366	0.668531	Yes
ALSEKIVSV	0.996398	ALSEKIVSV	0.000101041	10.7614	HLA-A*02:01	-0.0205165	-3.9955	-3.97499	0.000105929	0.637366	0.668531	Yes
YLAEKYEWDV	0.39302	YLAEKEWDV	0.0196203	10.7614	HLA-A*02:01	-0.0205165	-1.70729	-1.68678	0.0205695	0.637366	0.668531	Yes
ALAQRLLEV	0.962572	ALAQRLLEV	0.00285977	10.7614	HLA-A*02:01	-0.0205165	-2.54367	-2.52315	0.00299811	0.637366	0.668531	Yes
LMYPYIFHV	0.967891	LMYPYIFHV	0.00248928	10.7614	HLA-A*02:01	-0.0205165	-2.60393	-2.58341	0.0026097	0.637366	0.668531	Yes
NIMDIKIGLLV	0.08019	NIMDIKIGV	0.044305	10.7614	HLA-A*02:01	-0.0205165	-1.35355	-1.33303	0.0464482	0.637366	0.668531	Yes
RLNEAAVTV	0.946145	RLNEAAVTV	0.00383037	10.7614	HLA-A*02:01	-0.0205165	-2.41676	-2.39624	0.00401567	0.637366	0.668531	Yes
FLSEEGGHVAV	0.675004	FLSEGHVAV	0.0119718	10.7614	HLA-A*02:01	-0.0205165	-1.92184	-1.90132	0.012551	0.637366	0.668531	Yes
KLSLVAAMLLL	0.032782	KLSAAMLLL	0.0632119	10.7614	HLA-A*02:01	-0.0205165	-1.1992	-1.17868	0.0662697	0.637366	0.668531	Yes
GMYGKIAVMEL	0.461627	GMYGKIMEL	0.0175658	10.7614	HLA-A*02:01	-0.0205165	-1.75533	-1.73481	0.0184156	0.637366	0.668531	Yes
RLLDKWVEL	0.960717	RLLDKWVEL	0.00297306	10.7614	HLA-A*02:01	-0.0205165	-2.5268	-2.50628	0.00311688	0.637366	0.668531	Yes
SLAEVAGLQV	0.73051	SLAEVALQV	0.0106491	10.7614	HLA-A*02:01	-0.0205165	-1.97269	-1.95217	0.0111643	0.637366	0.668531	Yes
KLLDTMVDTFL	0.808728	KLLDVDTFL	0.0085793	10.7614	HLA-A*02:01	-0.0205165	-2.06655	-2.04603	0.00899432	0.637366	0.668531	Yes
ALWDKLFNL	0.993094	ALWDKLFNL	0.000342927	10.7614	HLA-A*02:01	-0.0205165	-3.4648	-3.44428	0.000359516	0.637366	0.668531	Yes
ALDEVFTKV	0.993349	ALDEVFTKV	0.000327618	10.7614	HLA-A*02:01	-0.0205165	-3.48463	-3.46412	0.000343466	0.637366	0.668531	Yes
ALLDVTPKAV	0.910398	ALLDVTPKV	0.00530006	10.7614	HLA-A*02:01	-0.0205165	-2.27572	-2.2552	0.00555645	0.637366	0.668531	Yes
VLIPKLPQL	0.992239	VLIPKLPQL	0.000428659	10.7614	HLA-A*02:01	-0.0205165	-3.36789	-3.34737	0.000449395	0.637366	0.668531	Yes
SLWSIISKV	0.969844	SLWSIISKV	0.00238518	10.7614	HLA-A*02:01	-0.0205165	-2.62248	-2.60196	0.00250056	0.637366	0.668531	Yes
YTWEEVFRV	0.966691	YTWEEVFRV	0.00257808	10.7614	HLA-A*02:01	-0.0205165	-2.5887	-2.56819	0.00270279	0.637366	0.668531	Yes
YGLPVVVKL	0.239246	YGLPVVVKL	0.0266748	10.7614	HLA-A*02:01	-0.0205165	-1.5739	-1.55338	0.0279652	0.637366	0.668531	Yes
YMFEEVPIVI	0.583445	YMFEEPIVI	0.0142621	10.7614	HLA-A*02:01	-0.0205165	-1.84582	-1.8253	0.014952	0.637366	0.668531	Yes
YLLDLHSYL	0.983313	YLLDLHSYL	0.00128291	10.7614	HLA-A*02:01	-0.0205165	-2.8918	-2.87129	0.00134498	0.637366	0.668531	Yes
SLAELKGFEV	0.678875	SLAEKGFEV	0.0118892	10.7614	HLA-A*02:01	-0.0205165	-1.92485	-1.90433	0.0124643	0.637366	0.668531	Yes
YLLDLHSYLL	0.874274	YLLDHSYLL	0.00653399	10.7614	HLA-A*02:01	-0.0205165	-2.18482	-2.16431	0.00685007	0.637366	0.668531	Yes
LSLENLEKI	0.049064	LSLENLEKI	0.0537232	10.7614	HLA-A*02:01	-0.0205165	-1.26984	-1.24932	0.056322	0.637366	0.668531	Yes
MLLDFIQHI	0.982211	MLLDFIQHI	0.0013962	10.7614	HLA-A*02:01	-0.0205165	-2.85505	-2.83453	0.00146374	0.637366	0.668531	Yes
FLDEPTNHL	0.998006	FLDEPTNHL	3.67422e-05	10.7614	HLA-A*02:01	-0.0205165	-4.43483	-4.41432	3.85196e-05	0.637366	0.668531	Yes
KLLEEQGIFL	0.864059	KLLEEQIFL	0.00689528	10.7614	HLA-A*02:01	-0.0205165	-2.16145	-2.14093	0.00722884	0.637366	0.668531	Yes
YVIAYIRDLAL	0.013023	YVIAYDLAL	0.0896326	10.7614	HLA-A*02:01	-0.0205165	-1.04753	-1.02702	0.0939685	0.637366	0.668531	Yes
ALGFYPAEITL	0.667291	ALYPAEITL	0.0121647	10.7614	HLA-A*02:01	-0.0205165	-1.9149	-1.89438	0.0127532	0.637366	0.668531	Yes
QLDSKFLEQV	0.324765	QLDSKLEQV	0.0222719	10.7614	HLA-A*02:01	-0.0205165	-1.65224	-1.63173	0.0233493	0.637366	0.668531	Yes
YLITLLEHL	0.933812	YLITLLEHL	0.004406	10.7614	HLA-A*02:01	-0.0205165	-2.35596	-2.33544	0.00461914	0.637366	0.668531	Yes
GLLTEIRAV	0.877706	GLLTEIRAV	0.00643295	10.7614	HLA-A*02:01	-0.0205165	-2.19159	-2.17107	0.00674414	0.637366	0.668531	Yes
YLLEEILDKV	0.944728	YLLEEILKV	0.00389773	10.7614	HLA-A*02:01	-0.0205165	-2.40919	-2.38867	0.00408629	0.637366	0.668531	Yes
RLINQVLEL	0.962391	RLINQVLEL	0.00288426	10.7614	HLA-A*02:01	-0.0205165	-2.53997	-2.51945	0.00302379	0.637366	0.668531	Yes
YLTDRVMTV	0.994519	YLTDRVMTV	0.000223515	10.7614	HLA-A*02:01	-0.0205165	-3.65069	-3.63018	0.000234327	0.637366	0.668531	Yes
FLINFIHTL	0.992667	FLINFIHTL	0.000385793	10.7614	HLA-A*02:01	-0.0205165	-3.41365	-3.39313	0.000404456	0.637366	0.668531	Yes
MLPPPPLTA	0.843208	MLPPPPLTA	0.00759645	10.7614	HLA-A*02:01	-0.0205165	-2.11939	-2.09887	0.00796392	0.637366	0.668531	Yes
SVIEQLFFV	0.960186	SVIEQLFFV	0.00302205	10.7614	HLA-A*02:01	-0.0205165	-2.5197	-2.49918	0.00316824	0.637366	0.668531	Yes
YLFERTFNL	0.996037	YLFERTFNL	0.00011635	10.7614	HLA-A*02:01	-0.0205165	-3.93423	-3.91372	0.000121979	0.637366	0.668531	Yes
SLVENIERLKV	0.610797	SLVENILKV	0.0134752	10.7614	HLA-A*02:01	-0.0205165	-1.87046	-1.84995	0.0141271	0.637366	0.668531	Yes
ALLQRLEAL	0.866275	ALLQRLEAL	0.00682486	10.7614	HLA-A*02:01	-0.0205165	-2.16591	-2.14539	0.00715501	0.637366	0.668531	Yes
LLFEHSDIVVI	0.241711	LLFEDIVVI	0.0265187	10.7614	HLA-A*02:01	-0.0205165	-1.57645	-1.55593	0.0278015	0.637366	0.668531	Yes
TLLHLAVSL	0.71724	TLLHLAVSL	0.01094	10.7614	HLA-A*02:01	-0.0205165	-1.96098	-1.94047	0.0114692	0.637366	0.668531	Yes
SLQEFLAAL	0.912	SLQEFLAAL	0.00524189	10.7614	HLA-A*02:01	-0.0205165	-2.28051	-2.26	0.00549546	0.637366	0.668531	Yes
GLLHLTLLL	0.784281	GLLHLTLLL	0.00916105	10.7614	HLA-A*02:01	-0.0205165	-2.03805	-2.01754	0.00960422	0.637366	0.668531	Yes
SLPDIKVYL	0.937076	SLPDIKVYL	0.00424372	10.7614	HLA-A*02:01	-0.0205165	-2.37225	-2.35174	0.00444901	0.637366	0.668531	Yes
FAIDPHLLLSV	0.209128	FAIDPLLSV	0.0285395	10.7614	HLA-A*02:01	-0.0205165	-1.54455	-1.52404	0.0299201	0.637366	0.668531	Yes
HLLDIYIQL	0.982781	HLLDIYIQL	0.00135028	10.7614	HLA-A*02:01	-0.0205165	-2.86958	-2.84906	0.00141559	0.637366	0.668531	Yes
FLVDIMEHL	0.981268	FLVDIMEHL	0.00149418	10.7614	HLA-A*02:01	-0.0205165	-2.8256	-2.80508	0.00156646	0.637366	0.668531	Yes
ILLDEEGHIKI	0.547051	ILLDEEIKI	0.0151255	10.7614	HLA-A*02:01	-0.0205165	-1.82029	-1.79977	0.0158572	0.637366	0.668531	Yes
RLIESLFTI	0.968247	RLIESLFTI	0.00245867	10.7614	HLA-A*02:01	-0.0205165	-2.6093	-2.58878	0.0025776	0.637366	0.668531	Yes
KLLETELLQEI	0.684759	KLLETLQEI	0.011733	10.7614	HLA-A*02:01	-0.0205165	-1.93059	-1.91007	0.0123006	0.637366	0.668531	Yes
FLAVKPDGV	0.806996	FLAVKPDGV	0.00859461	10.7614	HLA-A*02:01	-0.0205165	-2.06577	-2.04526	0.00901037	0.637366	0.668531	Yes
TLAEKIQTI	0.971183	TLAEKIQTI	0.00229026	10.7614	HLA-A*02:01	-0.0205165	-2.64011	-2.6196	0.00240105	0.637366	0.668531	Yes
ILLDDHGHIRI	0.396712	ILLDGHIRI	0.0195407	10.7614	HLA-A*02:01	-0.0205165	-1.70906	-1.68854	0.020486	0.637366	0.668531	Yes
KIMDYSLLVGI	0.289759	KIMDYLVGI	0.0239437	10.7614	HLA-A*02:01	-0.0205165	-1.62081	-1.60029	0.0251019	0.637366	0.668531	Yes
VLMQDSRLYL	0.469075	VLMDSRLYL	0.0172933	10.7614	HLA-A*02:01	-0.0205165	-1.76212	-1.7416	0.0181299	0.637366	0.668531	Yes
FLPEAPAEL	0.96476	FLPEAPAEL	0.00270974	10.7614	HLA-A*02:01	-0.0205165	-2.56707	-2.54656	0.00284082	0.637366	0.668531	Yes
ALIEKLVEL	0.995986	ALIEKLVEL	0.000122474	10.7614	HLA-A*02:01	-0.0205165	-3.91196	-3.89144	0.000128399	0.637366	0.668531	Yes
HLSIINEYL	0.607304	HLSIINEYL	0.0135824	10.7614	HLA-A*02:01	-0.0205165	-1.86702	-1.84651	0.0142394	0.637366	0.668531	Yes
GLLPDVPSL	0.988267	GLLPDVPSL	0.000817514	10.7614	HLA-A*02:01	-0.0205165	-3.0875	-3.06699	0.000857061	0.637366	0.668531	Yes
FLADPSAFVAA	0.591136	FLADPFVAA	0.0140386	10.7614	HLA-A*02:01	-0.0205165	-1.85268	-1.83216	0.0147177	0.637366	0.668531	Yes
SLGRFEITV	0.76344	SLGRFEITV	0.00982241	10.7614	HLA-A*02:01	-0.0205165	-2.00778	-1.98727	0.0102976	0.637366	0.668531	Yes
YLVEINKILL	0.628887	YLVEINILL	0.013022	10.7614	HLA-A*02:01	-0.0205165	-1.88532	-1.8648	0.013652	0.637366	0.668531	Yes
YLFDVQRNNIA	0.353432	YLFDVQRNA	0.0209951	10.7614	HLA-A*02:01	-0.0205165	-1.67788	-1.65737	0.0220107	0.637366	0.668531	Yes
SLLPYLPML	0.983598	SLLPYLPML	0.0012523	10.7614	HLA-A*02:01	-0.0205165	-2.90229	-2.88178	0.00131288	0.637366	0.668531	Yes
YLIDRDPTYF	0.283048	YLIDDPTYF	0.0242498	10.7614	HLA-A*02:01	-0.0205165	-1.61529	-1.59477	0.0254229	0.637366	0.668531	Yes
RLMEPIYLVEI	0.824486	RLMEPIVEI	0.00815983	10.7614	HLA-A*02:01	-0.0205165	-2.08832	-2.0678	0.00855456	0.637366	0.668531	Yes
GLIDKVNEL	0.983572	GLIDKVNEL	0.00125842	10.7614	HLA-A*02:01	-0.0205165	-2.90017	-2.87966	0.0013193	0.637366	0.668531	Yes
YMVHIQVTL	0.881327	YMVHIQVTL	0.00627373	10.7614	HLA-A*02:01	-0.0205165	-2.20247	-2.18196	0.00657722	0.637366	0.668531	Yes
YLSKIIPAL	0.980672	YLSKIIPAL	0.00154623	10.7614	HLA-A*02:01	-0.0205165	-2.81072	-2.79021	0.00162103	0.637366	0.668531	Yes
ALLAGSEYLKL	0.413522	ALLAGSLKL	0.0189743	10.7614	HLA-A*02:01	-0.0205165	-1.72183	-1.70132	0.0198922	0.637366	0.668531	Yes
RQLEEEGITFV	0.528489	RQLEGITFV	0.0156675	10.7614	HLA-A*02:01	-0.0205165	-1.805	-1.78448	0.0164254	0.637366	0.668531	Yes
FVDKTVLPFV	0.220408	FVDKTLPFV	0.0277281	10.7614	HLA-A*02:01	-0.0205165	-1.55708	-1.53656	0.0290694	0.637366	0.668531	Yes
VLWFKPVEL	0.945572	VLWFKPVEL	0.00385181	10.7614	HLA-A*02:01	-0.0205165	-2.41434	-2.39382	0.00403814	0.637366	0.668531	Yes
LLGPPPVGV	0.953678	LLGPPPVGV	0.00342621	10.7614	HLA-A*02:01	-0.0205165	-2.46519	-2.44467	0.00359195	0.637366	0.668531	Yes
VLDDKLVFV	0.993954	VLDDKLVFV	0.000257195	10.7614	HLA-A*02:01	-0.0205165	-3.58974	-3.56922	0.000269637	0.637366	0.668531	Yes
LLYVNVIGL	0.488405	LLYVNVIGL	0.016782	10.7614	HLA-A*02:01	-0.0205165	-1.77516	-1.75464	0.0175938	0.637366	0.668531	Yes
YLFDIQLPNI	0.865123	YLFDQLPNI	0.00685854	10.7614	HLA-A*02:01	-0.0205165	-2.16377	-2.14325	0.00719032	0.637366	0.668531	Yes
RLLDEEISRV	0.917234	RLLDEEISV	0.00506736	10.7614	HLA-A*02:01	-0.0205165	-2.29522	-2.2747	0.00531249	0.637366	0.668531	Yes
FLPETRIMTSV	0.60794	FLPETMTSV	0.0135671	10.7614	HLA-A*02:01	-0.0205165	-1.86751	-1.847	0.0142234	0.637366	0.668531	Yes
TLIDLPGITKV	0.925991	TLIDGITKV	0.00476118	10.7614	HLA-A*02:01	-0.0205165	-2.32229	-2.30177	0.0049915	0.637366	0.668531	Yes
YMLEHVITL	0.997909	YMLEHVITL	4.28659e-05	10.7614	HLA-A*02:01	-0.0205165	-4.36789	-4.34737	4.49395e-05	0.637366	0.668531	Yes
FLLPLRIAL	0.911348	FLLPLRIAL	0.00526638	10.7614	HLA-A*02:01	-0.0205165	-2.27849	-2.25797	0.00552114	0.637366	0.668531	Yes
FVYDPLVDWTA	0.602891	FVYDPLWTA	0.0137324	10.7614	HLA-A*02:01	-0.0205165	-1.86225	-1.84174	0.0143967	0.637366	0.668531	Yes
YLFDRNGVCL	0.715951	YLFDRNVCL	0.0109737	10.7614	HLA-A*02:01	-0.0205165	-1.95965	-1.93913	0.0115045	0.637366	0.668531	Yes
ILLKDILSV	0.981318	ILLKDILSV	0.001485	10.7614	HLA-A*02:01	-0.0205165	-2.82827	-2.80776	0.00155683	0.637366	0.668531	Yes
FLKDLVASV	0.971477	FLKDLVASV	0.0022474	10.7614	HLA-A*02:01	-0.0205165	-2.64832	-2.6278	0.00235611	0.637366	0.668531	Yes
YLTTLRALYL	0.120442	YLTTLALYL	0.0372933	10.7614	HLA-A*02:01	-0.0205165	-1.42837	-1.40785	0.0390974	0.637366	0.668531	Yes
LLLSLLPAL	0.832599	LLLSLLPAL	0.00792713	10.7614	HLA-A*02:01	-0.0205165	-2.10088	-2.08037	0.0083106	0.637366	0.668531	Yes
KLDAFVEGV	0.906445	KLDAFVEGV	0.00545009	10.7614	HLA-A*02:01	-0.0205165	-2.2636	-2.24308	0.00571374	0.637366	0.668531	Yes
ILIEKEYLERV	0.507577	ILIEKLERV	0.0161819	10.7614	HLA-A*02:01	-0.0205165	-1.79097	-1.77045	0.0169647	0.637366	0.668531	Yes
RLLEEGVLRQI	0.611242	RLLEEGVQI	0.0134599	10.7614	HLA-A*02:01	-0.0205165	-1.87096	-1.85044	0.014111	0.637366	0.668531	Yes
PLLDLHIEL	0.513835	PLLDLHIEL	0.016041	10.7614	HLA-A*02:01	-0.0205165	-1.79477	-1.77425	0.016817	0.637366	0.668531	Yes
VILDIPLLFET	0.021037	VILDIPLET	0.0748622	10.7614	HLA-A*02:01	-0.0205165	-1.12574	-1.10522	0.0784836	0.637366	0.668531	Yes
SLWFKPEEL	0.928171	SLWFKPEEL	0.00465707	10.7614	HLA-A*02:01	-0.0205165	-2.33189	-2.31137	0.00488236	0.637366	0.668531	Yes
FMDPQKMPYL	0.878372	FMDPQMPYL	0.00641764	10.7614	HLA-A*02:01	-0.0205165	-2.19262	-2.17211	0.00672809	0.637366	0.668531	Yes
SLLGHLMIV	0.953038	SLLGHLMIV	0.00346908	10.7614	HLA-A*02:01	-0.0205165	-2.45979	-2.43927	0.00363689	0.637366	0.668531	Yes
ALSPHNILL	0.933142	ALSPHNILL	0.00444887	10.7614	HLA-A*02:01	-0.0205165	-2.35175	-2.33123	0.00466408	0.637366	0.668531	Yes
TLYPLHILFV	0.73416	TLYPHILFV	0.0105573	10.7614	HLA-A*02:01	-0.0205165	-1.97645	-1.95593	0.011068	0.637366	0.668531	Yes
KLLDFQEFTL	0.889922	KLLDQEFTL	0.00600122	10.7614	HLA-A*02:01	-0.0205165	-2.22176	-2.20124	0.00629153	0.637366	0.668531	Yes
KLLEPVPVSV	0.971108	KLLEPPVSV	0.00229945	10.7614	HLA-A*02:01	-0.0205165	-2.63838	-2.61786	0.00241068	0.637366	0.668531	Yes
FMLPDPQNISL	0.888291	FMLPDPISL	0.00605021	10.7614	HLA-A*02:01	-0.0205165	-2.21823	-2.19771	0.00634289	0.637366	0.668531	Yes
RLLEGYEIYV	0.902274	RLLEGEIYV	0.00559094	10.7614	HLA-A*02:01	-0.0205165	-2.25252	-2.232	0.0058614	0.637366	0.668531	Yes
SLLSQQPFL	0.930718	SLLSQQPFL	0.00456522	10.7614	HLA-A*02:01	-0.0205165	-2.34054	-2.32002	0.00478606	0.637366	0.668531	Yes
HLSDAIVEV	0.986866	HLSDAIVEV	0.000933864	10.7614	HLA-A*02:01	-0.0205165	-3.02972	-3.0092	0.000979039	0.637366	0.668531	Yes
KLSEIPLTL	0.987895	KLSEIPLTL	0.000851194	10.7614	HLA-A*02:01	-0.0205165	-3.06997	-3.04945	0.00089237	0.637366	0.668531	Yes
FLQEEPGQLL	0.780009	FLQEEPQLL	0.00928659	10.7614	HLA-A*02:01	-0.0205165	-2.03214	-2.01163	0.00973582	0.637366	0.668531	Yes
KLFDAPLSI	0.984883	KLFDAPLSI	0.00111758	10.7614	HLA-A*02:01	-0.0205165	-2.95172	-2.93121	0.00117164	0.637366	0.668531	Yes
SLFPHAICL	0.934606	SLFPHAICL	0.00437844	10.7614	HLA-A*02:01	-0.0205165	-2.35868	-2.33816	0.00459025	0.637366	0.668531	Yes
LLSDTKLEL	0.850174	LLSDTKLEL	0.00738824	10.7614	HLA-A*02:01	-0.0205165	-2.13146	-2.11094	0.00774565	0.637366	0.668531	Yes
SLMPHFKSMYL	0.738884	SLMPHSMYL	0.0104409	10.7614	HLA-A*02:01	-0.0205165	-1.98126	-1.96075	0.010946	0.637366	0.668531	Yes
ALFPAPLAQI	0.772404	ALFPAPLQI	0.00954378	10.7614	HLA-A*02:01	-0.0205165	-2.02028	-1.99976	0.0100055	0.637366	0.668531	Yes
GLFPTSHSV	0.984332	GLFPTSHSV	0.001188	10.7614	HLA-A*02:01	-0.0205165	-2.92518	-2.90467	0.00124547	0.637366	0.668531	Yes
ALFEGKVQL	0.98841	ALFEGKVQL	0.000799143	10.7614	HLA-A*02:01	-0.0205165	-3.09738	-3.07686	0.000837801	0.637366	0.668531	Yes
KILPTLEAV	0.91159	KILPTLEAV	0.00525413	10.7614	HLA-A*02:01	-0.0205165	-2.2795	-2.25898	0.0055083	0.637366	0.668531	Yes
ALLRVTPFI	0.742721	ALLRVTPFI	0.0103552	10.7614	HLA-A*02:01	-0.0205165	-1.98484	-1.96433	0.0108561	0.637366	0.668531	Yes
YLMDINGKMWL	0.728145	YLMDGKMWL	0.0106981	10.7614	HLA-A*02:01	-0.0205165	-1.97069	-1.95018	0.0112156	0.637366	0.668531	Yes
HLGDFLVFL	0.930992	HLGDFLVFL	0.00455297	10.7614	HLA-A*02:01	-0.0205165	-2.34171	-2.32119	0.00477322	0.637366	0.668531	Yes
GLTPHLTMV	0.9401	GLTPHLTMV	0.00412431	10.7614	HLA-A*02:01	-0.0205165	-2.38465	-2.36413	0.00432382	0.637366	0.668531	Yes
GLDPLGYEIQL	0.643285	GLLGYEIQL	0.0127404	10.7614	HLA-A*02:01	-0.0205165	-1.89482	-1.8743	0.0133567	0.637366	0.668531	Yes
TLAEIAKVEL	0.578349	TLAEIAVEL	0.0143815	10.7614	HLA-A*02:01	-0.0205165	-1.8422	-1.82168	0.0150772	0.637366	0.668531	Yes
FLLPIKTVGV	0.860361	FLLPKTVGV	0.00703919	10.7614	HLA-A*02:01	-0.0205165	-2.15248	-2.13196	0.00737971	0.637366	0.668531	Yes
VLFELKLLL	0.929608	VLFELKLLL	0.00461115	10.7614	HLA-A*02:01	-0.0205165	-2.33619	-2.31567	0.00483421	0.637366	0.668531	Yes
NLLKLIAEV	0.886272	NLLKLIAEV	0.00613288	10.7614	HLA-A*02:01	-0.0205165	-2.21234	-2.19182	0.00642956	0.637366	0.668531	Yes
FLMDFIHQV	0.999347	FLMDFIHQV	9.18555e-06	10.7614	HLA-A*02:01	-0.0205165	-5.03689	-5.01638	9.6299e-06	0.637366	0.668531	Yes
LFLAILRLSL	0.006826	LLAILRLSL	0.11463	10.7614	HLA-A*02:01	-0.0205165	-0.940704	-0.920187	0.120175	0.637366	0.668531	Yes
KILEDVVGV	0.970969	KILEDVVGV	0.0023117	10.7614	HLA-A*02:01	-0.0205165	-2.63607	-2.61555	0.00242352	0.637366	0.668531	Yes
ILLEHNYAL	0.980147	ILLEHNYAL	0.00157685	10.7614	HLA-A*02:01	-0.0205165	-2.80221	-2.78169	0.00165313	0.637366	0.668531	Yes
FLHEESILERV	0.754144	FLHEESILV	0.0100643	10.7614	HLA-A*02:01	-0.0205165	-1.99722	-1.9767	0.0105512	0.637366	0.668531	Yes
FLTEIENLFL	0.711177	FLTEENLFL	0.0110961	10.7614	HLA-A*02:01	-0.0205165	-1.95483	-1.93431	0.0116329	0.637366	0.668531	Yes
YAYDGKDYIA	0.009717	YAYDGKDYA	0.100236	10.7614	HLA-A*02:01	-0.0205165	-0.998977	-0.978461	0.105085	0.637366	0.668531	Yes
YLLDIGCGTGL	0.670821	YLLDIGTGL	0.0120698	10.7614	HLA-A*02:01	-0.0205165	-1.9183	-1.89778	0.0126537	0.637366	0.668531	Yes
FLYDTHQNL	0.98758	FLYDTHQNL	0.000866503	10.7614	HLA-A*02:01	-0.0205165	-3.06223	-3.04171	0.00090842	0.637366	0.668531	Yes
GLLGDIAIHL	0.855208	GLLGDIIHL	0.00721066	10.7614	HLA-A*02:01	-0.0205165	-2.14203	-2.12151	0.00755947	0.637366	0.668531	Yes
KLIDGQVIQL	0.97315	KLIDGVIQL	0.00216167	10.7614	HLA-A*02:01	-0.0205165	-2.66521	-2.64469	0.00226624	0.637366	0.668531	Yes
RLWEYLLEL	0.984549	RLWEYLLEL	0.00117575	10.7614	HLA-A*02:01	-0.0205165	-2.92968	-2.90917	0.00123263	0.637366	0.668531	Yes
FLGIHVFLV	0.723007	FLGIHVFLV	0.0108053	10.7614	HLA-A*02:01	-0.0205165	-1.96636	-1.94585	0.011328	0.637366	0.668531	Yes
ILSEVQQAV	0.97392	ILSEVQQAV	0.00212186	10.7614	HLA-A*02:01	-0.0205165	-2.67328	-2.65277	0.00222451	0.637366	0.668531	Yes
RLVEIQYEL	0.976301	RLVEIQYEL	0.00191672	10.7614	HLA-A*02:01	-0.0205165	-2.71744	-2.69693	0.00200944	0.637366	0.668531	Yes
SLFDLNFQA	0.925823	SLFDLNFQA	0.00477036	10.7614	HLA-A*02:01	-0.0205165	-2.32145	-2.30093	0.00500113	0.637366	0.668531	Yes
IIFVPVPQL	0.63986	IIFVPVPQL	0.0128077	10.7614	HLA-A*02:01	-0.0205165	-1.89253	-1.87201	0.0134273	0.637366	0.668531	Yes
FLLEKGYEV	0.995724	FLLEKGYEV	0.000134721	10.7614	HLA-A*02:01	-0.0205165	-3.87056	-3.85005	0.000141238	0.637366	0.668531	Yes
TLLGHLDYI	0.840804	TLLGHLDYI	0.00766993	10.7614	HLA-A*02:01	-0.0205165	-2.11521	-2.09469	0.00804096	0.637366	0.668531	Yes
SLVELLVQL	0.980079	SLVELLVQL	0.00158604	10.7614	HLA-A*02:01	-0.0205165	-2.79969	-2.77917	0.00166276	0.637366	0.668531	Yes
GLGEGFQTVRV	0.539469	GLGEGFQTV	0.0153031	10.7614	HLA-A*02:01	-0.0205165	-1.81522	-1.7947	0.0160434	0.637366	0.668531	Yes
LLSHVIVAL	0.828463	LLSHVIVAL	0.0080741	10.7614	HLA-A*02:01	-0.0205165	-2.09291	-2.07239	0.00846468	0.637366	0.668531	Yes
GLSDLRLEL	0.851929	GLSDLRLEL	0.00734231	10.7614	HLA-A*02:01	-0.0205165	-2.13417	-2.11365	0.0076975	0.637366	0.668531	Yes
VLVDDDGIKVV	0.313449	VLDDGIKVV	0.022823	10.7614	HLA-A*02:01	-0.0205165	-1.64163	-1.62111	0.0239271	0.637366	0.668531	Yes
VLMTEDIKL	0.843172	VLMTEDIKL	0.00759951	10.7614	HLA-A*02:01	-0.0205165	-2.11921	-2.0987	0.00796713	0.637366	0.668531	Yes
ILADIVISA	0.955866	ILADIVISA	0.0032823	10.7614	HLA-A*02:01	-0.0205165	-2.48382	-2.4633	0.00344108	0.637366	0.668531	Yes
NLWSLVAKV	0.869479	NLWSLVAKV	0.00669933	10.7614	HLA-A*02:01	-0.0205165	-2.17397	-2.15345	0.0070234	0.637366	0.668531	Yes
RLIEESVTV	0.988954	RLIEESVTV	0.000750153	10.7614	HLA-A*02:01	-0.0205165	-3.12485	-3.10433	0.000786441	0.637366	0.668531	Yes
SLAETDKITL	0.646245	SLAETDITL	0.0126638	10.7614	HLA-A*02:01	-0.0205165	-1.89744	-1.87692	0.0132764	0.637366	0.668531	Yes
ILTDITKGV	0.850117	ILTDITKGV	0.0073913	10.7614	HLA-A*02:01	-0.0205165	-2.13128	-2.11076	0.00774886	0.637366	0.668531	Yes
ALLGAGCDPEL	0.490029	ALLGADPEL	0.016733	10.7614	HLA-A*02:01	-0.0205165	-1.77643	-1.75591	0.0175425	0.637366	0.668531	Yes
TLHSIIISL	0.935368	TLHSIIISL	0.00433558	10.7614	HLA-A*02:01	-0.0205165	-2.36295	-2.34244	0.00454531	0.637366	0.668531	Yes
FLASESLIKQI	0.373812	FLASESLQI	0.0202817	10.7614	HLA-A*02:01	-0.0205165	-1.6929	-1.67238	0.0212628	0.637366	0.668531	Yes
FLSTLEHHL	0.964045	FLSTLEHHL	0.00276791	10.7614	HLA-A*02:01	-0.0205165	-2.55785	-2.53733	0.00290181	0.637366	0.668531	Yes
ILLDDNMQIRL	0.865304	ILLDDNMQL	0.00685242	10.7614	HLA-A*02:01	-0.0205165	-2.16416	-2.14364	0.0071839	0.637366	0.668531	Yes
SLSHLVPAL	0.9098	SLSHLVPAL	0.00532149	10.7614	HLA-A*02:01	-0.0205165	-2.27397	-2.25345	0.00557892	0.637366	0.668531	Yes
RVDPNGSRYLL	0.081415	RVDPNGYLL	0.0440171	10.7614	HLA-A*02:01	-0.0205165	-1.35638	-1.33586	0.0461465	0.637366	0.668531	Yes
KLQEFLQTL	0.984561	KLQEFLQTL	0.00116963	10.7614	HLA-A*02:01	-0.0205165	-2.93195	-2.91144	0.00122621	0.637366	0.668531	Yes
MLNEHDFEV	0.983941	MLNEHDFEV	0.00121249	10.7614	HLA-A*02:01	-0.0205165	-2.91632	-2.8958	0.00127115	0.637366	0.668531	Yes
SLAQYLINV	0.97856	SLAQYLINV	0.00170545	10.7614	HLA-A*02:01	-0.0205165	-2.76816	-2.74764	0.00178795	0.637366	0.668531	Yes
GLYDSQNPPTV	0.936043	GLYDSPPTV	0.00429271	10.7614	HLA-A*02:01	-0.0205165	-2.36727	-2.34675	0.00450037	0.637366	0.668531	Yes
SLLPFLKAV	0.976477	SLLPFLKAV	0.00189528	10.7614	HLA-A*02:01	-0.0205165	-2.72233	-2.70181	0.00198697	0.637366	0.668531	Yes
ALLVRLQEV	0.941437	ALLVRLQEV	0.00406307	10.7614	HLA-A*02:01	-0.0205165	-2.39115	-2.37063	0.00425962	0.637366	0.668531	Yes
KLQEFELPYV	0.902682	KLQEELPYV	0.00557257	10.7614	HLA-A*02:01	-0.0205165	-2.25394	-2.23343	0.00584214	0.637366	0.668531	Yes
YVYEYLLHV	0.980271	YVYEYLLHV	0.00156767	10.7614	HLA-A*02:01	-0.0205165	-2.80475	-2.78423	0.0016435	0.637366	0.668531	Yes
KLMELLEEI	0.985469	KLMELLEEI	0.00104715	10.7614	HLA-A*02:01	-0.0205165	-2.97999	-2.95947	0.00109781	0.637366	0.668531	Yes
YLFAVNIKL	0.962867	YLFAVNIKL	0.00282609	10.7614	HLA-A*02:01	-0.0205165	-2.54881	-2.5283	0.0029628	0.637366	0.668531	Yes
TLSDLRVYL	0.889478	TLSDLRVYL	0.00602572	10.7614	HLA-A*02:01	-0.0205165	-2.21999	-2.19947	0.00631721	0.637366	0.668531	Yes
SLFKIWLV	0.558618	SLF-KIWLV	0.014801	10.7614	HLA-A*02:01	-0.0205165	-1.82971	-1.80919	0.015517	0.637366	0.668531	Yes
LLYGHTVTV	0.988814	LLYGHTVTV	0.0007624	10.7614	HLA-A*02:01	-0.0205165	-3.11782	-3.0973	0.000799281	0.637366	0.668531	Yes
SLPELVHAV	0.992272	SLPELVHAV	0.000425597	10.7614	HLA-A*02:01	-0.0205165	-3.371	-3.35048	0.000446185	0.637366	0.668531	Yes
YMAELIERL	0.987056	YMAELIERL	0.000912431	10.7614	HLA-A*02:01	-0.0205165	-3.0398	-3.01928	0.00095657	0.637366	0.668531	Yes
LLLDAKLLV	0.893183	LLLDAKLLV	0.00591243	10.7614	HLA-A*02:01	-0.0205165	-2.22823	-2.20772	0.00619844	0.637366	0.668531	Yes
GLMDTVKKV	0.965457	GLMDTVKKV	0.00266075	10.7614	HLA-A*02:01	-0.0205165	-2.575	-2.55448	0.00278946	0.637366	0.668531	Yes
LLEKVIEL	0.492789	LL-EKVIEL	0.0166595	10.7614	HLA-A*02:01	-0.0205165	-1.77834	-1.75782	0.0174654	0.637366	0.668531	Yes
GLIEDHFDVTV	0.828745	GLIEDHVTV	0.00806491	10.7614	HLA-A*02:01	-0.0205165	-2.0934	-2.07288	0.00845505	0.637366	0.668531	Yes
ALNEKLVNL	0.982069	ALNEKLVNL	0.00140845	10.7614	HLA-A*02:01	-0.0205165	-2.85126	-2.83074	0.00147658	0.637366	0.668531	Yes
FLLPKVQSI	0.995661	FLLPKVQSI	0.000140845	10.7614	HLA-A*02:01	-0.0205165	-3.85126	-3.83074	0.000147658	0.637366	0.668531	Yes
YLTDLQVSL	0.988695	YLTDLQVSL	0.000774648	10.7614	HLA-A*02:01	-0.0205165	-3.1109	-3.09038	0.000812121	0.637366	0.668531	Yes
ALDPAAQAFL	0.541267	ALDPAQAFL	0.0152572	10.7614	HLA-A*02:01	-0.0205165	-1.81653	-1.79601	0.0159953	0.637366	0.668531	Yes
GMYGKIAVMEL	0.461627	GMYGKIMEL	0.0175597	10.7614	HLA-A*02:01	-0.0205165	-1.75548	-1.73497	0.0184092	0.637366	0.668531	Yes
VLLEQPTWQL	0.881141	VLLEQPWQL	0.00628598	10.7614	HLA-A*02:01	-0.0205165	-2.20163	-2.18111	0.00659006	0.637366	0.668531	Yes
RLLEIDPYL	0.981288	RLLEIDPYL	0.00149112	10.7614	HLA-A*02:01	-0.0205165	-2.82649	-2.80597	0.00156325	0.637366	0.668531	Yes
FLYFEDHGL	0.907777	FLYFEDHGL	0.00538885	10.7614	HLA-A*02:01	-0.0205165	-2.2685	-2.24799	0.00564954	0.637366	0.668531	Yes
YMIAHITGL	0.93237	YMIAHITGL	0.00447336	10.7614	HLA-A*02:01	-0.0205165	-2.34937	-2.32885	0.00468976	0.637366	0.668531	Yes
KLLEYIEEI	0.992718	KLLEYIEEI	0.000379669	10.7614	HLA-A*02:01	-0.0205165	-3.42059	-3.40008	0.000398036	0.637366	0.668531	Yes
KLIDETQDMLL	0.886657	KLIDETMLL	0.0061237	10.7614	HLA-A*02:01	-0.0205165	-2.21299	-2.19247	0.00641993	0.637366	0.668531	Yes
YLGLLENVRV	0.350441	YLLLENVRV	0.0211053	10.7614	HLA-A*02:01	-0.0205165	-1.67561	-1.65509	0.0221263	0.637366	0.668531	Yes
YQFDKVGILTL	0.805211	YQFDGILTL	0.00864666	10.7614	HLA-A*02:01	-0.0205165	-2.06315	-2.04263	0.00906494	0.637366	0.668531	Yes
TILPKVMQV	0.968672	TILPKVMQV	0.00243417	10.7614	HLA-A*02:01	-0.0205165	-2.61365	-2.59313	0.00255192	0.637366	0.668531	Yes
FLQEKSPAV	0.992772	FLQEKSPAV	0.000367422	10.7614	HLA-A*02:01	-0.0205165	-3.43483	-3.41432	0.000385196	0.637366	0.668531	Yes
ILAPVVKEI	0.930427	ILAPVVKEI	0.0045744	10.7614	HLA-A*02:01	-0.0205165	-2.33967	-2.31915	0.00479569	0.637366	0.668531	Yes
SLLGHLMIV	0.953038	SLLGHLMIV	0.00346601	10.7614	HLA-A*02:01	-0.0205165	-2.46017	-2.43965	0.00363368	0.637366	0.668531	Yes
IILEEGKEILV	0.201542	IILEEEILV	0.0290325	10.7614	HLA-A*02:01	-0.0205165	-1.53712	-1.5166	0.0304369	0.637366	0.668531	Yes
SLLDPVPEV	0.997423	SLLDPVPEV	6.1237e-05	10.7614	HLA-A*02:01	-0.0205165	-4.21299	-4.19247	6.41993e-05	0.637366	0.668531	Yes
ALAALHVTL	0.81962	ALAALHVTL	0.0082823	10.7614	HLA-A*02:01	-0.0205165	-2.08185	-2.06133	0.00868296	0.637366	0.668531	Yes
ILWSHLELL	0.933396	ILWSHLELL	0.0044305	10.7614	HLA-A*02:01	-0.0205165	-2.35355	-2.33303	0.00464482	0.637366	0.668531	Yes
VLVQVSPSL	0.832065	VLVQVSPSL	0.00793631	10.7614	HLA-A*02:01	-0.0205165	-2.10038	-2.07986	0.00832023	0.637366	0.668531	Yes
FMYNFQLVTL	0.514177	FMYNQLVTL	0.0160288	10.7614	HLA-A*02:01	-0.0205165	-1.7951	-1.77458	0.0168042	0.637366	0.668531	Yes
YLADVTNAL	0.986174	YLADVTNAL	0.000979792	10.7614	HLA-A*02:01	-0.0205165	-3.00887	-2.98835	0.00102719	0.637366	0.668531	Yes
NIIEAINELLV	0.086829	NIIEAINEV	0.0428812	10.7614	HLA-A*02:01	-0.0205165	-1.36773	-1.34722	0.0449556	0.637366	0.668531	Yes
SLYKGLLSV	0.986931	SLYKGLLSV	0.000924679	10.7614	HLA-A*02:01	-0.0205165	-3.03401	-3.01349	0.000969409	0.637366	0.668531	Yes
RLIDDEVRILI	0.560015	RLIDDEILI	0.0147795	10.7614	HLA-A*02:01	-0.0205165	-1.83034	-1.80982	0.0154945	0.637366	0.668531	Yes
KLLDQMPSL	0.991588	KLLDQMPSL	0.000502143	10.7614	HLA-A*02:01	-0.0205165	-3.29917	-3.27866	0.000526434	0.637366	0.668531	Yes
FLYKVVQV	0.774378	FLY-KVVQV	0.00948255	10.7614	HLA-A*02:01	-0.0205165	-2.02307	-2.00256	0.00994126	0.637366	0.668531	Yes
YLYEHNFAF	0.899288	YLYEHNFAF	0.00570116	10.7614	HLA-A*02:01	-0.0205165	-2.24404	-2.22352	0.00597696	0.637366	0.668531	Yes
GLDDIKDLKV	0.624076	GLDDIKLKV	0.0131384	10.7614	HLA-A*02:01	-0.0205165	-1.88146	-1.86094	0.013774	0.637366	0.668531	Yes
YLDVSVGKIVA	0.025817	YLDVGKIVA	0.069259	10.7614	HLA-A*02:01	-0.0205165	-1.15952	-1.13901	0.0726094	0.637366	0.668531	Yes
ALWGFFPVL	0.84361	ALWGFFPVL	0.0075842	10.7614	HLA-A*02:01	-0.0205165	-2.12009	-2.09957	0.00795108	0.637366	0.668531	Yes
YLLLKTHQL	0.985986	YLLLKTHQL	0.000985915	10.7614	HLA-A*02:01	-0.0205165	-3.00616	-2.98564	0.00103361	0.637366	0.668531	Yes
VIIPLLHTV	0.976185	VIIPLLHTV	0.00193203	10.7614	HLA-A*02:01	-0.0205165	-2.71399	-2.69347	0.00202549	0.637366	0.668531	Yes
LLTDILVFL	0.94073	LLTDILVFL	0.00408757	10.7614	HLA-A*02:01	-0.0205165	-2.38853	-2.36802	0.0042853	0.637366	0.668531	Yes
GQSELASRLTL	0.054318	GQSELALTL	0.0516197	10.7614	HLA-A*02:01	-0.0205165	-1.28718	-1.26667	0.0541168	0.637366	0.668531	Yes
YMVHIQVTL	0.881327	YMVHIQVTL	0.00627679	10.7614	HLA-A*02:01	-0.0205165	-2.20226	-2.18175	0.00658043	0.637366	0.668531	Yes
GLLPEPNILQL	0.880988	GLLPEILQL	0.00629822	10.7614	HLA-A*02:01	-0.0205165	-2.20078	-2.18027	0.0066029	0.637366	0.668531	Yes
FMLPDPQNISL	0.888291	FMLPDPISL	0.00604715	10.7614	HLA-A*02:01	-0.0205165	-2.21845	-2.19793	0.00633968	0.637366	0.668531	Yes
ALNSKILSV	0.979225	ALNSKILSV	0.00166871	10.7614	HLA-A*02:01	-0.0205165	-2.77762	-2.7571	0.00174943	0.637366	0.668531	Yes
FLHDNMVEI	0.981544	FLHDNMVEI	0.00145438	10.7614	HLA-A*02:01	-0.0205165	-2.83732	-2.81681	0.00152473	0.637366	0.668531	Yes
TVAPFNPTV	0.882338	TVAPFNPTV	0.00624617	10.7614	HLA-A*02:01	-0.0205165	-2.20439	-2.18387	0.00654833	0.637366	0.668531	Yes
SLADVHIEV	0.989872	SLADVHIEV	0.000636865	10.7614	HLA-A*02:01	-0.0205165	-3.19595	-3.17544	0.000667673	0.637366	0.668531	Yes
VNLPINGNGKQ	6e-06	VLPINGNGK	0.832021	10.7614	HLA-A*02:01	-0.0205165	-0.0798658	-0.0593493	0.87227	0.637366	0.668531	Yes
ALAKLVEAI	0.711532	ALAKLVEAI	0.0110839	10.7614	HLA-A*02:01	-0.0205165	-1.95531	-1.93479	0.0116201	0.637366	0.668531	Yes
TLAELHISL	0.953736	TLAELHISL	0.00341702	10.7614	HLA-A*02:01	-0.0205165	-2.46635	-2.44584	0.00358232	0.637366	0.668531	Yes
ALLPSSPTL	0.970055	ALLPSSPTL	0.002376	10.7614	HLA-A*02:01	-0.0205165	-2.62415	-2.60364	0.00249093	0.637366	0.668531	Yes
HLWSYLITL	0.94326	HLWSYLITL	0.00393448	10.7614	HLA-A*02:01	-0.0205165	-2.40511	-2.3846	0.00412481	0.637366	0.668531	Yes
VLSNVEVTL	0.864633	VLSNVEVTL	0.00687691	10.7614	HLA-A*02:01	-0.0205165	-2.16261	-2.14209	0.00720958	0.637366	0.668531	Yes
TLLNVIKSV	0.935146	TLLNVIKSV	0.00434783	10.7614	HLA-A*02:01	-0.0205165	-2.36173	-2.34121	0.00455815	0.637366	0.668531	Yes
RQIEYYFSV	0.900329	RQIEYYFSV	0.00566748	10.7614	HLA-A*02:01	-0.0205165	-2.24661	-2.22609	0.00594165	0.637366	0.668531	Yes
ALLETVNRL	0.967848	ALLETVNRL	0.00250765	10.7614	HLA-A*02:01	-0.0205165	-2.60073	-2.58022	0.00262896	0.637366	0.668531	Yes
ALKDFVASI	0.849556	ALKDFVASI	0.0074158	10.7614	HLA-A*02:01	-0.0205165	-2.12984	-2.10933	0.00777454	0.637366	0.668531	Yes
FLAEDPKVTL	0.92625	FLAEDPVTL	0.0047428	10.7614	HLA-A*02:01	-0.0205165	-2.32396	-2.30345	0.00497224	0.637366	0.668531	Yes
NLYPFVKTV	0.967373	NLYPFVKTV	0.00252603	10.7614	HLA-A*02:01	-0.0205165	-2.59756	-2.57705	0.00264822	0.637366	0.668531	Yes
HLFDAFVSV	0.985783	HLFDAFVSV	0.00101653	10.7614	HLA-A*02:01	-0.0205165	-2.99288	-2.97236	0.00106571	0.637366	0.668531	Yes
ILMGVLKEV	0.966333	ILMGVLKEV	0.0026087	10.7614	HLA-A*02:01	-0.0205165	-2.58358	-2.56306	0.00273489	0.637366	0.668531	Yes
KVPQLEIVPN	2.9e-05	KVPQEIVPN	0.648953	10.7614	HLA-A*02:01	-0.0205165	-0.187787	-0.16727	0.680346	0.637366	0.668531	Yes
IVLPAGALHQV	0.265464	IVLPALHQV	0.0251102	10.7614	HLA-A*02:01	-0.0205165	-1.60015	-1.57963	0.0263249	0.637366	0.668531	Yes
FLAELPGSLSL	0.910393	FLLPGSLSL	0.00530312	10.7614	HLA-A*02:01	-0.0205165	-2.27547	-2.25495	0.00555966	0.637366	0.668531	Yes
VLYPHEPTAV	0.888037	VLYPEPTAV	0.00606246	10.7614	HLA-A*02:01	-0.0205165	-2.21735	-2.19683	0.00635573	0.637366	0.668531	Yes
ALLDQLHTL	0.995258	ALLDQLHTL	0.000171464	10.7614	HLA-A*02:01	-0.0205165	-3.76583	-3.74531	0.000179758	0.637366	0.668531	Yes
SLLESVQKL	0.986782	SLLESVQKL	0.00094305	10.7614	HLA-A*02:01	-0.0205165	-3.02547	-3.00495	0.000988669	0.637366	0.668531	Yes
FLLPLIIVL	0.949775	FLLPLIIVL	0.00366503	10.7614	HLA-A*02:01	-0.0205165	-2.43592	-2.41541	0.00384233	0.637366	0.668531	Yes
ALLDIIRSL	0.978051	ALLDIIRSL	0.00174219	10.7614	HLA-A*02:01	-0.0205165	-2.7589	-2.73839	0.00182647	0.637366	0.668531	Yes
ALLEADVNIKL	0.857296	ALLDVNIKL	0.00716167	10.7614	HLA-A*02:01	-0.0205165	-2.14499	-2.12447	0.00750811	0.637366	0.668531	Yes
FLFRDILEL	0.979364	FLFRDILEL	0.0016534	10.7614	HLA-A*02:01	-0.0205165	-2.78162	-2.76111	0.00173338	0.637366	0.668531	Yes
AIMDLLLRL	0.920849	AIMDLLLRL	0.00491121	10.7614	HLA-A*02:01	-0.0205165	-2.30881	-2.2883	0.00514878	0.637366	0.668531	Yes
GLLSIFTKV	0.940368	GLLSIFTKV	0.00410594	10.7614	HLA-A*02:01	-0.0205165	-2.38659	-2.36607	0.00430456	0.637366	0.668531	Yes
RLQEDPPAGV	0.782807	RLQEDPPAV	0.00919473	10.7614	HLA-A*02:01	-0.0205165	-2.03646	-2.01594	0.00963953	0.637366	0.668531	Yes
TLTNVIHNL	0.913473	TLTNVIHNL	0.00519596	10.7614	HLA-A*02:01	-0.0205165	-2.28433	-2.26382	0.00544731	0.637366	0.668531	Yes
SVLKSIQEV	0.867531	SVLKSIQEV	0.00677893	10.7614	HLA-A*02:01	-0.0205165	-2.16884	-2.14832	0.00710686	0.637366	0.668531	Yes
ALLAGPLRPA	0.213369	ALLAGPLRA	0.0282272	10.7614	HLA-A*02:01	-0.0205165	-1.54933	-1.52882	0.0295927	0.637366	0.668531	Yes
ALSELIILT	0.630409	ALSELIILT	0.0130037	10.7614	HLA-A*02:01	-0.0205165	-1.88593	-1.86542	0.0136327	0.637366	0.668531	Yes
ALTGIPLPLI	0.190867	ALTGPLPLI	0.0299081	10.7614	HLA-A*02:01	-0.0205165	-1.52421	-1.50369	0.0313549	0.637366	0.668531	Yes
FLLDKALLI	0.963181	FLLDKALLI	0.00281078	10.7614	HLA-A*02:01	-0.0205165	-2.55117	-2.53066	0.00294675	0.637366	0.668531	Yes
KTLEGEFSV	0.834988	KTLEGEFSV	0.00785058	10.7614	HLA-A*02:01	-0.0205165	-2.1051	-2.08458	0.00823035	0.637366	0.668531	Yes
SMYDKVLML	0.980046	SMYDKVLML	0.00159216	10.7614	HLA-A*02:01	-0.0205165	-2.79801	-2.7775	0.00166918	0.637366	0.668531	Yes
YLLDQHILI	0.974506	YLLDQHILI	0.00206675	10.7614	HLA-A*02:01	-0.0205165	-2.68471	-2.6642	0.00216673	0.637366	0.668531	Yes
ILSVFIPSL	0.868415	ILSVFIPSL	0.00674219	10.7614	HLA-A*02:01	-0.0205165	-2.1712	-2.15068	0.00706834	0.637366	0.668531	Yes
FLYPFPLALF	0.407323	FLYPFPLAL	0.0191917	10.7614	HLA-A*02:01	-0.0205165	-1.71689	-1.69637	0.0201201	0.637366	0.668531	Yes
ALFPHLLQPVL	0.801769	ALFPHLLQL	0.00872321	10.7614	HLA-A*02:01	-0.0205165	-2.05932	-2.03881	0.00914519	0.637366	0.668531	Yes
FLRNINEYL	0.809576	FLRNINEYL	0.00855175	10.7614	HLA-A*02:01	-0.0205165	-2.06795	-2.04743	0.00896543	0.637366	0.668531	Yes
GILGIQPPSV	0.48313	GILGIPPSV	0.016929	10.7614	HLA-A*02:01	-0.0205165	-1.77137	-1.75085	0.0177479	0.637366	0.668531	Yes
KLLEPVLLL	0.986528	KLLEPVLLL	0.000958359	10.7614	HLA-A*02:01	-0.0205165	-3.01847	-2.99796	0.00100472	0.637366	0.668531	Yes
ALNGKLYIV	0.901284	ALNGKLYIV	0.00563074	10.7614	HLA-A*02:01	-0.0205165	-2.24943	-2.22892	0.00590313	0.637366	0.668531	Yes
ILLAEVPTM	0.863325	ILLAEVPTM	0.00692897	10.7614	HLA-A*02:01	-0.0205165	-2.15933	-2.13882	0.00726415	0.637366	0.668531	Yes
SIAAVLPKV	0.948828	SIAAVLPKV	0.00370484	10.7614	HLA-A*02:01	-0.0205165	-2.43123	-2.41071	0.00388406	0.637366	0.668531	Yes
TLMEEVLLLGL	0.758532	TLMEEVLLL	0.00993876	10.7614	HLA-A*02:01	-0.0205165	-2.00267	-1.98215	0.0104195	0.637366	0.668531	Yes
ALLADEFAL	0.773935	ALLADEFAL	0.00949479	10.7614	HLA-A*02:01	-0.0205165	-2.02251	-2.002	0.0099541	0.637366	0.668531	Yes
RLAQHITYV	0.98563	RLAQHITYV	0.00103797	10.7614	HLA-A*02:01	-0.0205165	-2.98382	-2.9633	0.00108818	0.637366	0.668531	Yes
GLWHGMFANV	0.508156	GLWHGMFNV	0.0161666	10.7614	HLA-A*02:01	-0.0205165	-1.79138	-1.77087	0.0169486	0.637366	0.668531	Yes
CLIKEVDIYTV	0.045084	CLIKDIYTV	0.0555236	10.7614	HLA-A*02:01	-0.0205165	-1.25552	-1.23501	0.0582095	0.637366	0.668531	Yes
ALYDVRTILL	0.813634	ALYDVTILL	0.00842009	10.7614	HLA-A*02:01	-0.0205165	-2.07468	-2.05417	0.0088274	0.637366	0.668531	Yes
ALYPNVVQV	0.996226	ALYPNVVQV	0.000110227	10.7614	HLA-A*02:01	-0.0205165	-3.95771	-3.9372	0.000115559	0.637366	0.668531	Yes
ALFKAWAL	0.207223	ALF-KAWAL	0.028662	10.7614	HLA-A*02:01	-0.0205165	-1.54269	-1.52218	0.0300485	0.637366	0.668531	Yes
TLMEEVLLL	0.97691	TLMEEVLLL	0.00184936	10.7614	HLA-A*02:01	-0.0205165	-2.73298	-2.71246	0.00193882	0.637366	0.668531	Yes
VMAPRTLVL	0.536692	VMAPRTLVL	0.0154042	10.7614	HLA-A*02:01	-0.0205165	-1.81236	-1.79185	0.0161493	0.637366	0.668531	Yes
VLNNVVIHL	0.962693	VLNNVVIHL	0.00284446	10.7614	HLA-A*02:01	-0.0205165	-2.546	-2.52548	0.00298206	0.637366	0.668531	Yes
SLIEKYFSV	0.993949	SLIEKYFSV	0.000263319	10.7614	HLA-A*02:01	-0.0205165	-3.57952	-3.559	0.000276057	0.637366	0.668531	Yes
VLFEGRTVQL	0.92982	VLFEGTVQL	0.00460502	10.7614	HLA-A*02:01	-0.0205165	-2.33677	-2.31625	0.00482779	0.637366	0.668531	Yes
YLSGIAHFL	0.973039	YLSGIAHFL	0.00217391	10.7614	HLA-A*02:01	-0.0205165	-2.66276	-2.64224	0.00227908	0.637366	0.668531	Yes
YLNHLEPPV	0.823253	YLNHLEPPV	0.00818432	10.7614	HLA-A*02:01	-0.0205165	-2.08702	-2.0665	0.00858024	0.637366	0.668531	Yes
RLYHITDQV	0.90949	RLYHITDQV	0.00533068	10.7614	HLA-A*02:01	-0.0205165	-2.27322	-2.2527	0.00558855	0.637366	0.668531	Yes
PPYTVVYFPVR	4e-06	PPYTVVPVR	0.864614	10.7614	HLA-A*02:01	-0.0205165	-0.0631776	-0.0426611	0.90644	0.637366	0.668531	Yes
SILEDPPSI	0.901637	SILEDPPSI	0.00561849	10.7614	HLA-A*02:01	-0.0205165	-2.25038	-2.22986	0.00589029	0.637366	0.668531	Yes
KLFTQIFGVGV	0.593415	KLFTQIVGV	0.0139773	10.7614	HLA-A*02:01	-0.0205165	-1.85458	-1.83406	0.0146535	0.637366	0.668531	Yes
YLIARVMLL	0.935893	YLIARVMLL	0.00430802	10.7614	HLA-A*02:01	-0.0205165	-2.36572	-2.34521	0.00451642	0.637366	0.668531	Yes
ILSELAPSL	0.968047	ILSELAPSL	0.0024801	10.7614	HLA-A*02:01	-0.0205165	-2.60553	-2.58501	0.00260007	0.637366	0.668531	Yes
GLATDVQTV	0.935755	GLATDVQTV	0.00432027	10.7614	HLA-A*02:01	-0.0205165	-2.36449	-2.34397	0.00452926	0.637366	0.668531	Yes
VLLSEILHL	0.970343	VLLSEILHL	0.00235762	10.7614	HLA-A*02:01	-0.0205165	-2.62753	-2.60701	0.00247167	0.637366	0.668531	Yes
LLAELPASV	0.973238	LLAELPASV	0.0021586	10.7614	HLA-A*02:01	-0.0205165	-2.66583	-2.64531	0.00226303	0.637366	0.668531	Yes
FLFSKFIEL	0.99201	FLFSKFIEL	0.000462339	10.7614	HLA-A*02:01	-0.0205165	-3.33504	-3.31452	0.000484705	0.637366	0.668531	Yes
LLQDKQFEL	0.956764	LLQDKQFEL	0.00322413	10.7614	HLA-A*02:01	-0.0205165	-2.49159	-2.47107	0.00338009	0.637366	0.668531	Yes
VLADQVWTL	0.99241	VLADQVWTL	0.000410288	10.7614	HLA-A*02:01	-0.0205165	-3.38691	-3.36639	0.000430135	0.637366	0.668531	Yes
SLMSHAIEL	0.964667	SLMSHAIEL	0.00271892	10.7614	HLA-A*02:01	-0.0205165	-2.5656	-2.54509	0.00285045	0.637366	0.668531	Yes
KLLDISELDMV	0.777387	KLLDISELV	0.00939682	10.7614	HLA-A*02:01	-0.0205165	-2.02702	-2.0065	0.00985138	0.637366	0.668531	Yes
YLIGQHVTAAL	0.503739	YLIGQHVTL	0.0163135	10.7614	HLA-A*02:01	-0.0205165	-1.78745	-1.76694	0.0171027	0.637366	0.668531	Yes
ALMDEVVKA	0.976568	ALMDEVVKA	0.00187691	10.7614	HLA-A*02:01	-0.0205165	-2.72656	-2.70604	0.00196771	0.637366	0.668531	Yes
SLLKEPQKVQL	0.640404	SLLKEPVQL	0.0127832	10.7614	HLA-A*02:01	-0.0205165	-1.89336	-1.87284	0.0134016	0.637366	0.668531	Yes
LLAEPVPGI	0.967267	LLAEPVPGI	0.00253521	10.7614	HLA-A*02:01	-0.0205165	-2.59599	-2.57547	0.00265785	0.637366	0.668531	Yes
KLIDFGSGALL	0.525252	KLIDFGALL	0.015741	10.7614	HLA-A*02:01	-0.0205165	-1.80297	-1.78245	0.0165024	0.637366	0.668531	Yes
VLLSEQGDVKL	0.506747	VLLSGDVKL	0.0162094	10.7614	HLA-A*02:01	-0.0205165	-1.79023	-1.76972	0.0169936	0.637366	0.668531	Yes
GLLPGCVYHV	0.875825	GLLPGVYHV	0.00647275	10.7614	HLA-A*02:01	-0.0205165	-2.18891	-2.16839	0.00678587	0.637366	0.668531	Yes
YLNDGLWHM	0.974214	YLNDGLWHM	0.00208818	10.7614	HLA-A*02:01	-0.0205165	-2.68023	-2.65972	0.0021892	0.637366	0.668531	Yes
ALAPGLPTA	0.971667	ALAPGLPTA	0.00224434	10.7614	HLA-A*02:01	-0.0205165	-2.64891	-2.6284	0.0023529	0.637366	0.668531	Yes
GLAKLIADV	0.616949	GLAKLIADV	0.0133037	10.7614	HLA-A*02:01	-0.0205165	-1.87603	-1.85551	0.0139473	0.637366	0.668531	Yes
NLFHYLTEV	0.967965	NLFHYLTEV	0.00248316	10.7614	HLA-A*02:01	-0.0205165	-2.605	-2.58448	0.00260328	0.637366	0.668531	Yes
HLAELIAEL	0.977237	HLAELIAEL	0.00181568	10.7614	HLA-A*02:01	-0.0205165	-2.74096	-2.72044	0.00190351	0.637366	0.668531	Yes
LLWPGAALL	0.885671	LLWPGAALL	0.00614513	10.7614	HLA-A*02:01	-0.0205165	-2.21147	-2.19095	0.0064424	0.637366	0.668531	Yes
LMEQVAQL	0.144374	-LMEQVAQL	0.0341457	10.7614	HLA-A*02:01	-0.0205165	-1.46666	-1.44615	0.0357975	0.637366	0.668531	Yes
FLTKQEILL	0.868353	FLTKQEILL	0.00674525	10.7614	HLA-A*02:01	-0.0205165	-2.171	-2.15049	0.00707155	0.637366	0.668531	Yes
ILLDIHIFM	0.851422	ILLDIHIFM	0.00736375	10.7614	HLA-A*02:01	-0.0205165	-2.1329	-2.11238	0.00771997	0.637366	0.668531	Yes
YLPYPIHQV	0.990274	YLPYPIHQV	0.000615432	10.7614	HLA-A*02:01	-0.0205165	-3.21082	-3.1903	0.000645203	0.637366	0.668531	Yes
LVDIIEKV	0.107925	-LVDIIEKV	0.0390723	10.7614	HLA-A*02:01	-0.0205165	-1.40813	-1.38761	0.0409624	0.637366	0.668531	Yes
VLQYVVPEV	0.921849	VLQYVVPEV	0.00487753	10.7614	HLA-A*02:01	-0.0205165	-2.3118	-2.29128	0.00511347	0.637366	0.668531	Yes
SVIEQIVYV	0.986313	SVIEQIVYV	0.000970606	10.7614	HLA-A*02:01	-0.0205165	-3.01296	-2.99244	0.00101756	0.637366	0.668531	Yes
SLLGDDALVQV	0.952273	SLLDALVQV	0.00351194	10.7614	HLA-A*02:01	-0.0205165	-2.45445	-2.43394	0.00368183	0.637366	0.668531	Yes
KMDASLGNLFA	0.016026	KMDAGNLFA	0.0828169	10.7614	HLA-A*02:01	-0.0205165	-1.08188	-1.06136	0.0868231	0.637366	0.668531	Yes
FLIEPEHVNTV	0.927426	FLIEPEHTV	0.00467851	10.7614	HLA-A*02:01	-0.0205165	-2.32989	-2.30938	0.00490483	0.637366	0.668531	Yes
FLWPKEVEL	0.99548	FLWPKEVEL	0.000159216	10.7614	HLA-A*02:01	-0.0205165	-3.79801	-3.7775	0.000166918	0.637366	0.668531	Yes
ALSQDIPEI	0.932943	ALSQDIPEI	0.00445499	10.7614	HLA-A*02:01	-0.0205165	-2.35115	-2.33064	0.0046705	0.637366	0.668531	Yes
KLLEVNGVAL	0.752121	KLLEVNVAL	0.0101133	10.7614	HLA-A*02:01	-0.0205165	-1.99511	-1.97459	0.0106025	0.637366	0.668531	Yes
RLQEFIDEV	0.976874	RLQEFIDEV	0.00185242	10.7614	HLA-A*02:01	-0.0205165	-2.73226	-2.71174	0.00194203	0.637366	0.668531	Yes
ALTPVVVTL	0.972688	ALTPVVVTL	0.00218616	10.7614	HLA-A*02:01	-0.0205165	-2.66032	-2.6398	0.00229192	0.637366	0.668531	Yes
FLDGNELTL	0.977909	FLDGNELTL	0.00175138	10.7614	HLA-A*02:01	-0.0205165	-2.75662	-2.7361	0.0018361	0.637366	0.668531	Yes
HAVYRDDLKKL	0.001186	AVYDDLKKL	0.218227	10.7614	HLA-A*02:01	-0.0205165	-0.661091	-0.640575	0.228784	0.637366	0.668531	Yes
VVPPFLQPEV	0.265298	VVPPFLPEV	0.0251194	10.7614	HLA-A*02:01	-0.0205165	-1.59999	-1.57947	0.0263346	0.637366	0.668531	Yes
FLFDGSPTYV	0.989772	FLFDGPTYV	0.000652174	10.7614	HLA-A*02:01	-0.0205165	-3.18564	-3.16512	0.000683723	0.637366	0.668531	Yes
KLAEFIDFL	0.960149	KLAEFIDFL	0.00302511	10.7614	HLA-A*02:01	-0.0205165	-2.51926	-2.49874	0.00317145	0.637366	0.668531	Yes
TIIDLPGITRV	0.413464	TIIDGITRV	0.0189773	10.7614	HLA-A*02:01	-0.0205165	-1.72176	-1.70125	0.0198954	0.637366	0.668531	Yes
YLDFTNPKV	0.971992	YLDFTNPKV	0.00221678	10.7614	HLA-A*02:01	-0.0205165	-2.65428	-2.63376	0.00232401	0.637366	0.668531	Yes
ALQDVPLSSV	0.857961	ALQDVPLSV	0.00712492	10.7614	HLA-A*02:01	-0.0205165	-2.14722	-2.1267	0.00746959	0.637366	0.668531	Yes
VLTNKLLTV	0.927177	VLTNKLLTV	0.00468769	10.7614	HLA-A*02:01	-0.0205165	-2.32904	-2.30852	0.00491446	0.637366	0.668531	Yes
SLFQGVEFHYV	0.846128	SLFQGVHYV	0.0075199	10.7614	HLA-A*02:01	-0.0205165	-2.12379	-2.10327	0.00788367	0.637366	0.668531	Yes
GLADNTVIAKV	0.764325	GLADVIAKV	0.00979792	10.7614	HLA-A*02:01	-0.0205165	-2.00887	-1.98835	0.0102719	0.637366	0.668531	Yes
HLYDIHVTV	0.987907	HLYDIHVTV	0.000842009	10.7614	HLA-A*02:01	-0.0205165	-3.07468	-3.05417	0.00088274	0.637366	0.668531	Yes
YLQDQHLLLTV	0.875856	YLQDQLLTV	0.00646969	10.7614	HLA-A*02:01	-0.0205165	-2.18912	-2.1686	0.00678266	0.637366	0.668531	Yes
SLWKEVSEL	0.940311	SLWKEVSEL	0.004109	10.7614	HLA-A*02:01	-0.0205165	-2.38626	-2.36575	0.00430777	0.637366	0.668531	Yes
FLAKLIAQA	0.891262	FLAKLIAQA	0.00596754	10.7614	HLA-A*02:01	-0.0205165	-2.2242	-2.20369	0.00625622	0.637366	0.668531	Yes
RLWGEPVNL	0.965378	RLWGEPVNL	0.00267299	10.7614	HLA-A*02:01	-0.0205165	-2.573	-2.55249	0.0028023	0.637366	0.668531	Yes
ALNELLQHV	0.99132	ALNELLQHV	0.000517453	10.7614	HLA-A*02:01	-0.0205165	-3.28613	-3.26561	0.000542484	0.637366	0.668531	Yes
ILFDCPGQIEL	0.940718	ILFDGQIEL	0.00409063	10.7614	HLA-A*02:01	-0.0205165	-2.38821	-2.36769	0.00428851	0.637366	0.668531	Yes
FLADPSAFV	0.984857	FLADPSAFV	0.00112064	10.7614	HLA-A*02:01	-0.0205165	-2.95054	-2.93002	0.00117485	0.637366	0.668531	Yes
SLIDILVAL	0.982225	SLIDILVAL	0.00139314	10.7614	HLA-A*02:01	-0.0205165	-2.856	-2.83549	0.00146053	0.637366	0.668531	Yes
YLLEEKIASL	0.919953	YLLEEKISL	0.00495407	10.7614	HLA-A*02:01	-0.0205165	-2.30504	-2.28452	0.00519372	0.637366	0.668531	Yes
RLQEDPPVGV	0.805065	RLQEDPPGV	0.00864972	10.7614	HLA-A*02:01	-0.0205165	-2.063	-2.04248	0.00906815	0.637366	0.668531	Yes
AMWEHPITA	0.983058	AMWEHPITA	0.00130435	10.7614	HLA-A*02:01	-0.0205165	-2.88461	-2.86409	0.00136745	0.637366	0.668531	Yes
KLLEVSDDPQV	0.890773	KLLEVSPQV	0.00597979	10.7614	HLA-A*02:01	-0.0205165	-2.22331	-2.2028	0.00626906	0.637366	0.668531	Yes
ILYDKLEKI	0.981208	ILYDKLEKI	0.00149724	10.7614	HLA-A*02:01	-0.0205165	-2.82471	-2.80419	0.00156967	0.637366	0.668531	Yes
FIDEYVETV	0.985099	FIDEYVETV	0.00109614	10.7614	HLA-A*02:01	-0.0205165	-2.96013	-2.93962	0.00114917	0.637366	0.668531	Yes
YLINNPNQISL	0.776426	YLIPNQISL	0.00943662	10.7614	HLA-A*02:01	-0.0205165	-2.02518	-2.00467	0.00989311	0.637366	0.668531	Yes
KLGEIVTTI	0.955802	KLGEIVTTI	0.00328843	10.7614	HLA-A*02:01	-0.0205165	-2.48301	-2.4625	0.0034475	0.637366	0.668531	Yes
SLAEKIQAL	0.987906	SLAEKIQAL	0.00084507	10.7614	HLA-A*02:01	-0.0205165	-3.07311	-3.05259	0.00088595	0.637366	0.668531	Yes
VYPFPGPI	0.000156	-VYPFPGPI	0.42609	10.7614	HLA-A*02:01	-0.0205165	-0.370499	-0.349982	0.446702	0.637366	0.668531	Yes
ALLQQPLFL	0.891334	ALLQQPLFL	0.00596448	10.7614	HLA-A*02:01	-0.0205165	-2.22443	-2.20391	0.00625301	0.637366	0.668531	Yes
HLWAELVFL	0.909768	HLWAELVFL	0.00532456	10.7614	HLA-A*02:01	-0.0205165	-2.27372	-2.2532	0.00558213	0.637366	0.668531	Yes
FLDHVMYTI	0.942316	FLDHVMYTI	0.00397122	10.7614	HLA-A*02:01	-0.0205165	-2.40108	-2.38056	0.00416332	0.637366	0.668531	Yes
AVMEQIPEI	0.977288	AVMEQIPEI	0.00180343	10.7614	HLA-A*02:01	-0.0205165	-2.7439	-2.72338	0.00189067	0.637366	0.668531	Yes
FLGIYLLTI	0.301572	FLGIYLLTI	0.023365	10.7614	HLA-A*02:01	-0.0205165	-1.63143	-1.61092	0.0244952	0.637366	0.668531	Yes
FAYDGKDYI	0.250175	FAYDGKDYI	0.0259706	10.7614	HLA-A*02:01	-0.0205165	-1.58552	-1.565	0.0272269	0.637366	0.668531	Yes
SLSPIYPAA	0.782749	SLSPIYPAA	0.0091978	10.7614	HLA-A*02:01	-0.0205165	-2.03632	-2.0158	0.00964274	0.637366	0.668531	Yes
FLLPKVQSIQL	0.909868	FLLPQSIQL	0.00531537	10.7614	HLA-A*02:01	-0.0205165	-2.27447	-2.25395	0.0055725	0.637366	0.668531	Yes
SLLPFWYTL	0.86399	SLLPFWYTL	0.00691059	10.7614	HLA-A*02:01	-0.0205165	-2.16048	-2.13997	0.00724489	0.637366	0.668531	Yes
LLSEHVIAI	0.956301	LLSEHVIAI	0.00325475	10.7614	HLA-A*02:01	-0.0205165	-2.48748	-2.46697	0.00341219	0.637366	0.668531	Yes
LLSSIVEEL	0.914268	LLSSIVEEL	0.00515922	10.7614	HLA-A*02:01	-0.0205165	-2.28742	-2.2669	0.00540879	0.637366	0.668531	Yes
ILFDHMVPLV	0.873892	ILFDHVPLV	0.0065493	10.7614	HLA-A*02:01	-0.0205165	-2.18381	-2.16329	0.00686612	0.637366	0.668531	Yes
TLADVLYHV	0.992306	TLADVLYHV	0.000419473	10.7614	HLA-A*02:01	-0.0205165	-3.3773	-3.35678	0.000439765	0.637366	0.668531	Yes
SLAEVLQQL	0.990312	SLAEVLQQL	0.00061237	10.7614	HLA-A*02:01	-0.0205165	-3.21299	-3.19247	0.000641993	0.637366	0.668531	Yes
VLLFERELHSV	0.343201	VLLRELHSV	0.0214574	10.7614	HLA-A*02:01	-0.0205165	-1.66842	-1.64791	0.0224954	0.637366	0.668531	Yes
LLSAEPVPA	0.231162	LLSAEPVPA	0.0270821	10.7614	HLA-A*02:01	-0.0205165	-1.56732	-1.5468	0.0283921	0.637366	0.668531	Yes
YLLEQDFPGM	0.579365	YLLEDFPGM	0.014357	10.7614	HLA-A*02:01	-0.0205165	-1.84294	-1.82242	0.0150515	0.637366	0.668531	Yes
KLYPQLPAEI	0.7642	KLYPQLPEI	0.00980404	10.7614	HLA-A*02:01	-0.0205165	-2.00859	-1.98808	0.0102783	0.637366	0.668531	Yes
TLLTAIVKL	0.917058	TLLTAIVKL	0.00507042	10.7614	HLA-A*02:01	-0.0205165	-2.29496	-2.27444	0.0053157	0.637366	0.668531	Yes
GQIEVVPEV	0.979199	GQIEVVPEV	0.00167177	10.7614	HLA-A*02:01	-0.0205165	-2.77682	-2.75631	0.00175264	0.637366	0.668531	Yes
GLDELFVQV	0.987085	GLDELFVQV	0.000906307	10.7614	HLA-A*02:01	-0.0205165	-3.04272	-3.02221	0.00095015	0.637366	0.668531	Yes
YLVVKIEKV	0.952497	YLVVKIEKV	0.00349051	10.7614	HLA-A*02:01	-0.0205165	-2.45711	-2.43659	0.00365936	0.637366	0.668531	Yes
YIFEEPFTI	0.982671	YIFEEPFTI	0.00135946	10.7614	HLA-A*02:01	-0.0205165	-2.86663	-2.84612	0.00142522	0.637366	0.668531	Yes
SLTRHQFYL	0.718137	SLTRHQFYL	0.0109094	10.7614	HLA-A*02:01	-0.0205165	-1.9622	-1.94168	0.0114371	0.637366	0.668531	Yes
GVAPSRAIYFA	0.019432	GVAPSIYFA	0.0770514	10.7614	HLA-A*02:01	-0.0205165	-1.11322	-1.0927	0.0807788	0.637366	0.668531	Yes
YLDGHLITTV	0.935585	YLDGHITTV	0.00432639	10.7614	HLA-A*02:01	-0.0205165	-2.36387	-2.34336	0.00453568	0.637366	0.668531	Yes
LIDKVWQL	0.479805	-LIDKVWQL	0.01703	10.7614	HLA-A*02:01	-0.0205165	-1.76879	-1.74827	0.0178538	0.637366	0.668531	Yes
TLWYRAPEV	0.875178	TLWYRAPEV	0.00650031	10.7614	HLA-A*02:01	-0.0205165	-2.18707	-2.16655	0.00681476	0.637366	0.668531	Yes
LLSKVLIYL	0.848101	LLSKVLIYL	0.00746173	10.7614	HLA-A*02:01	-0.0205165	-2.12716	-2.10664	0.00782269	0.637366	0.668531	Yes
RLAVYIDRV	0.717732	RLAVYIDRV	0.0109247	10.7614	HLA-A*02:01	-0.0205165	-1.96159	-1.94107	0.0114532	0.637366	0.668531	Yes
SLMDHTIPEV	0.969982	SLMDHIPEV	0.00238212	10.7614	HLA-A*02:01	-0.0205165	-2.62304	-2.60252	0.00249735	0.637366	0.668531	Yes
FLTEFINYI	0.958849	FLTEFINYI	0.00310165	10.7614	HLA-A*02:01	-0.0205165	-2.50841	-2.48789	0.00325169	0.637366	0.668531	Yes
VLQNVAFSV	0.791928	VLQNVAFSV	0.00896509	10.7614	HLA-A*02:01	-0.0205165	-2.04745	-2.02693	0.00939878	0.637366	0.668531	Yes
FLDKQGFYV	0.984054	FLDKQGFYV	0.00120943	10.7614	HLA-A*02:01	-0.0205165	-2.91742	-2.8969	0.00126794	0.637366	0.668531	Yes
SILSLVTKI	0.529163	SILSLVTKI	0.0156277	10.7614	HLA-A*02:01	-0.0205165	-1.80611	-1.78559	0.0163837	0.637366	0.668531	Yes
SLNGLEVHL	0.89761	SLNGLEVHL	0.00575934	10.7614	HLA-A*02:01	-0.0205165	-2.23963	-2.21911	0.00603794	0.637366	0.668531	Yes
VLIRDLNFEV	0.602564	VLIDLNFEV	0.0137446	10.7614	HLA-A*02:01	-0.0205165	-1.86187	-1.84135	0.0144095	0.637366	0.668531	Yes
SLHDAIMIV	0.927476	SLHDAIMIV	0.00466932	10.7614	HLA-A*02:01	-0.0205165	-2.33075	-2.31023	0.0048952	0.637366	0.668531	Yes
YLDKTFYNL	0.966038	YLDKTFYNL	0.00262707	10.7614	HLA-A*02:01	-0.0205165	-2.58053	-2.56001	0.00275415	0.637366	0.668531	Yes
SLSEKQYFL	0.957938	SLSEKQYFL	0.00314452	10.7614	HLA-A*02:01	-0.0205165	-2.50245	-2.48193	0.00329663	0.637366	0.668531	Yes
VMFEDGVLMRL	0.612504	VMFEDLMRL	0.0134231	10.7614	HLA-A*02:01	-0.0205165	-1.87215	-1.85163	0.0140725	0.637366	0.668531	Yes
VLASLIIRL	0.951934	VLASLIIRL	0.00352419	10.7614	HLA-A*02:01	-0.0205165	-2.45294	-2.43242	0.00369467	0.637366	0.668531	Yes
NMYEGVGRMFI	0.17468	NMYEGVMFI	0.0312339	10.7614	HLA-A*02:01	-0.0205165	-1.50537	-1.48486	0.0327449	0.637366	0.668531	Yes
FLFEPVVKAFL	0.862383	FLFEPVVKL	0.00696571	10.7614	HLA-A*02:01	-0.0205165	-2.15703	-2.13652	0.00730267	0.637366	0.668531	Yes
ALLAELEKI	0.850018	ALLAELEKI	0.00739743	10.7614	HLA-A*02:01	-0.0205165	-2.13092	-2.1104	0.00775528	0.637366	0.668531	Yes
SLNELRVLL	0.854206	SLNELRVLL	0.00724434	10.7614	HLA-A*02:01	-0.0205165	-2.14	-2.11948	0.00759478	0.637366	0.668531	Yes
LMVDHVTEV	0.985872	LMVDHVTEV	0.00100122	10.7614	HLA-A*02:01	-0.0205165	-2.99947	-2.97895	0.00104966	0.637366	0.668531	Yes
GLLDLPFRVGV	0.840429	GLLDLPVGV	0.00767912	10.7614	HLA-A*02:01	-0.0205165	-2.11469	-2.09417	0.00805059	0.637366	0.668531	Yes
SLIKQIPRI	0.941447	SLIKQIPRI	0.00405389	10.7614	HLA-A*02:01	-0.0205165	-2.39213	-2.37161	0.00424999	0.637366	0.668531	Yes
ALGEEALLRYV	0.385453	ALGEEALYV	0.0198714	10.7614	HLA-A*02:01	-0.0205165	-1.70177	-1.68125	0.0208327	0.637366	0.668531	Yes
ILLPYVSKV	0.990949	ILLPYVSKV	0.000557257	10.7614	HLA-A*02:01	-0.0205165	-3.25394	-3.23343	0.000584214	0.637366	0.668531	Yes
ILGIQPPSV	0.874947	ILGIQPPSV	0.00650643	10.7614	HLA-A*02:01	-0.0205165	-2.18666	-2.16614	0.00682118	0.637366	0.668531	Yes
FLPDPSALQNL	0.706964	FLPDPLQNL	0.0112002	10.7614	HLA-A*02:01	-0.0205165	-1.95077	-1.93026	0.0117421	0.637366	0.668531	Yes
FIIEKQPPQV	0.825872	FIIEKPPQV	0.00813533	10.7614	HLA-A*02:01	-0.0205165	-2.08962	-2.06911	0.00852888	0.637366	0.668531	Yes
YLAHFIEGL	0.934948	YLAHFIEGL	0.00435701	10.7614	HLA-A*02:01	-0.0205165	-2.36081	-2.34029	0.00456778	0.637366	0.668531	Yes
FMQDPMEVFV	0.748212	FMQDPEVFV	0.0102235	10.7614	HLA-A*02:01	-0.0205165	-1.9904	-1.96988	0.0107181	0.637366	0.668531	Yes
FLFVDPELVSA	0.831341	FLFPELVSA	0.00796693	10.7614	HLA-A*02:01	-0.0205165	-2.09871	-2.07819	0.00835233	0.637366	0.668531	Yes
ILQNKIDLV	0.753547	ILQNKIDLV	0.0100796	10.7614	HLA-A*02:01	-0.0205165	-1.99656	-1.97604	0.0105672	0.637366	0.668531	Yes
YLVEDIQHI	0.985217	YLVEDIQHI	0.00107777	10.7614	HLA-A*02:01	-0.0205165	-2.96747	-2.94696	0.00112991	0.637366	0.668531	Yes
KLLDPEDISV	0.944796	KLLDPEISV	0.00389467	10.7614	HLA-A*02:01	-0.0205165	-2.40953	-2.38901	0.00408308	0.637366	0.668531	Yes
RVIGTLEEV	0.789524	RVIGTLEEV	0.00901715	10.7614	HLA-A*02:01	-0.0205165	-2.04493	-2.02441	0.00945335	0.637366	0.668531	Yes
ALLERGYSL	0.950081	ALLERGYSL	0.00364666	10.7614	HLA-A*02:01	-0.0205165	-2.4381	-2.41759	0.00382307	0.637366	0.668531	Yes
ILVDTVWAL	0.954606	ILVDTVWAL	0.00337416	10.7614	HLA-A*02:01	-0.0205165	-2.47183	-2.45132	0.00353738	0.637366	0.668531	Yes
FLYAGHIFL	0.959743	FLYAGHIFL	0.00304654	10.7614	HLA-A*02:01	-0.0205165	-2.51619	-2.49568	0.00319392	0.637366	0.668531	Yes
LSEVFIQL	0.113176	-LSEVFIQL	0.0382945	10.7614	HLA-A*02:01	-0.0205165	-1.41686	-1.39635	0.040147	0.637366	0.668531	Yes
SLLEKSLGL	0.955501	SLLEKSLGL	0.0033068	10.7614	HLA-A*02:01	-0.0205165	-2.48059	-2.46008	0.00346676	0.637366	0.668531	Yes
FLMKNSDLYGA	0.277301	FLMSDLYGA	0.0245254	10.7614	HLA-A*02:01	-0.0205165	-1.61038	-1.58987	0.0257118	0.637366	0.668531	Yes
SLAQYNPKL	0.925966	SLAQYNPKL	0.00476424	10.7614	HLA-A*02:01	-0.0205165	-2.32201	-2.30149	0.00499471	0.637366	0.668531	Yes
LLASEVPQL	0.969133	LLASEVPQL	0.00241886	10.7614	HLA-A*02:01	-0.0205165	-2.61639	-2.59587	0.00253587	0.637366	0.668531	Yes
VLLSHLSYL	0.922299	VLLSHLSYL	0.00486222	10.7614	HLA-A*02:01	-0.0205165	-2.31317	-2.29265	0.00509742	0.637366	0.668531	Yes
WLIEDGKVVTV	0.641114	WLIEDVVTV	0.012774	10.7614	HLA-A*02:01	-0.0205165	-1.89367	-1.87316	0.013392	0.637366	0.668531	Yes
TLSDIMVSL	0.969447	TLSDIMVSL	0.00240355	10.7614	HLA-A*02:01	-0.0205165	-2.61915	-2.59863	0.00251982	0.637366	0.668531	Yes
GLAPPQHLIRV	0.751458	GLAPPLIRV	0.0101317	10.7614	HLA-A*02:01	-0.0205165	-1.99432	-1.9738	0.0106218	0.637366	0.668531	Yes
LLDHAPPEI	0.937422	LLDHAPPEI	0.00421923	10.7614	HLA-A*02:01	-0.0205165	-2.37477	-2.35425	0.00442333	0.637366	0.668531	Yes
FLNNQEYVL	0.882271	FLNNQEYVL	0.00624923	10.7614	HLA-A*02:01	-0.0205165	-2.20417	-2.18366	0.00655154	0.637366	0.668531	Yes
SLVDTVYAL	0.955451	SLVDTVYAL	0.00331292	10.7614	HLA-A*02:01	-0.0205165	-2.47979	-2.45927	0.00347318	0.637366	0.668531	Yes
KMMDVTVTI	0.983738	KMMDVTVTI	0.00124311	10.7614	HLA-A*02:01	-0.0205165	-2.90549	-2.88497	0.00130325	0.637366	0.668531	Yes
KIGDFGLATV	0.457051	KIGDGLATV	0.0176607	10.7614	HLA-A*02:01	-0.0205165	-1.75299	-1.73247	0.0185151	0.637366	0.668531	Yes
ALALIYNEAL	0.077266	ALALINEAL	0.0449663	10.7614	HLA-A*02:01	-0.0205165	-1.34711	-1.3266	0.0471415	0.637366	0.668531	Yes
RLLYQLVFL	0.784615	RLLYQLVFL	0.00914574	10.7614	HLA-A*02:01	-0.0205165	-2.03878	-2.01826	0.00958817	0.637366	0.668531	Yes
ILDVTVVYL	0.9365	ILDVTVVYL	0.00428047	10.7614	HLA-A*02:01	-0.0205165	-2.36851	-2.34799	0.00448753	0.637366	0.668531	Yes
LLFPHPVNQV	0.928904	LLFPHPVQV	0.00463564	10.7614	HLA-A*02:01	-0.0205165	-2.33389	-2.31337	0.00485989	0.637366	0.668531	Yes
FLFEPVVKA	0.984948	FLFEPVVKA	0.00110533	10.7614	HLA-A*02:01	-0.0205165	-2.95651	-2.93599	0.0011588	0.637366	0.668531	Yes
ALLDWVTSV	0.997297	ALLDWVTSV	6.42988e-05	10.7614	HLA-A*02:01	-0.0205165	-4.1918	-4.17128	6.74093e-05	0.637366	0.668531	Yes
FISEFEHRV	0.968317	FISEFEHRV	0.0024556	10.7614	HLA-A*02:01	-0.0205165	-2.60984	-2.58933	0.00257439	0.637366	0.668531	Yes
LLMEHIQEI	0.993717	LLMEHIQEI	0.000287814	10.7614	HLA-A*02:01	-0.0205165	-3.54089	-3.52037	0.000301737	0.637366	0.668531	Yes
SMLQKTWLL	0.869478	SMLQKTWLL	0.00670239	10.7614	HLA-A*02:01	-0.0205165	-2.17377	-2.15325	0.00702661	0.637366	0.668531	Yes
VMQDPEFLQSV	0.571225	VMQDPLQSV	0.0145285	10.7614	HLA-A*02:01	-0.0205165	-1.83778	-1.81726	0.0152313	0.637366	0.668531	Yes
YMDQWVPVI	0.843946	YMDQWVPVI	0.00756277	10.7614	HLA-A*02:01	-0.0205165	-2.12132	-2.1008	0.00792861	0.637366	0.668531	Yes
FLDLGPPGI	0.936888	FLDLGPPGI	0.00425903	10.7614	HLA-A*02:01	-0.0205165	-2.37069	-2.35017	0.00446506	0.637366	0.668531	Yes
VLLTDILVFL	0.578399	VLLDILVFL	0.0143754	10.7614	HLA-A*02:01	-0.0205165	-1.84238	-1.82186	0.0150708	0.637366	0.668531	Yes
VLLESKILL	0.907973	VLLESKILL	0.00537967	10.7614	HLA-A*02:01	-0.0205165	-2.26924	-2.24873	0.00563991	0.637366	0.668531	Yes
RMFDMGFEYQV	0.679613	RMFDFEYQV	0.0118494	10.7614	HLA-A*02:01	-0.0205165	-1.92631	-1.90579	0.0124226	0.637366	0.668531	Yes
FLWQEGHSAFA	0.485872	FLWQEGHSA	0.016834	10.7614	HLA-A*02:01	-0.0205165	-1.77381	-1.75329	0.0176484	0.637366	0.668531	Yes
FLLDGFPRTV	0.959154	FLLDGFPTV	0.00308634	10.7614	HLA-A*02:01	-0.0205165	-2.51056	-2.49004	0.00323564	0.637366	0.668531	Yes
RLPEAIEEV	0.975745	RLPEAIEEV	0.00196265	10.7614	HLA-A*02:01	-0.0205165	-2.70716	-2.68664	0.00205759	0.637366	0.668531	Yes
TLWYKIFTT	0.576208	TLWYKIFTT	0.0144152	10.7614	HLA-A*02:01	-0.0205165	-1.84118	-1.82066	0.0151125	0.637366	0.668531	Yes
RDLLLWLLL	0.000773	RDLLLWLLL	0.253031	10.7614	HLA-A*02:01	-0.0205165	-0.596826	-0.576309	0.265272	0.637366	0.668531	Yes
SLLRDVPLA	0.696135	SLLRDVPLA	0.0114115	10.7614	HLA-A*02:01	-0.0205165	-1.94266	-1.92214	0.0119635	0.637366	0.668531	Yes
SLQEKLWAI	0.970313	SLQEKLWAI	0.00236069	10.7614	HLA-A*02:01	-0.0205165	-2.62696	-2.60645	0.00247488	0.637366	0.668531	Yes
VLAWGLLNV	0.862597	VLAWGLLNV	0.00695652	10.7614	HLA-A*02:01	-0.0205165	-2.15761	-2.13709	0.00729304	0.637366	0.668531	Yes
VLYPASPHGV	0.850637	VLYPSPHGV	0.00737906	10.7614	HLA-A*02:01	-0.0205165	-2.132	-2.11148	0.00773602	0.637366	0.668531	Yes
KLNATNIEL	0.863063	KLNATNIEL	0.00694427	10.7614	HLA-A*02:01	-0.0205165	-2.15837	-2.13786	0.0072802	0.637366	0.668531	Yes
NIFPYPVGV	0.937706	NIFPYPVGV	0.00421004	10.7614	HLA-A*02:01	-0.0205165	-2.37571	-2.3552	0.0044137	0.637366	0.668531	Yes
TMAKESSIIGV	0.182871	TMASSIIGV	0.0304991	10.7614	HLA-A*02:01	-0.0205165	-1.51571	-1.4952	0.0319745	0.637366	0.668531	Yes
YLLESVNKL	0.992076	YLLESVNKL	0.000440906	10.7614	HLA-A*02:01	-0.0205165	-3.35565	-3.33514	0.000462235	0.637366	0.668531	Yes
ILLNPAYDVYL	0.466522	ILLNPDVYL	0.0173882	10.7614	HLA-A*02:01	-0.0205165	-1.75974	-1.73923	0.0182294	0.637366	0.668531	Yes
RLLKSKLYL	0.679708	RLLKSKLYL	0.0118463	10.7614	HLA-A*02:01	-0.0205165	-1.92642	-1.9059	0.0124194	0.637366	0.668531	Yes
MLAWINESL	0.707294	MLAWINESL	0.0111941	10.7614	HLA-A*02:01	-0.0205165	-1.95101	-1.93049	0.0117356	0.637366	0.668531	Yes
YMFEEVPIVI	0.583445	YMFEEPIVI	0.0142652	10.7614	HLA-A*02:01	-0.0205165	-1.84572	-1.82521	0.0149552	0.637366	0.668531	Yes
LLYQGPHNTL	0.647435	LLYQGPHTL	0.0126424	10.7614	HLA-A*02:01	-0.0205165	-1.89817	-1.87765	0.0132539	0.637366	0.668531	Yes
YLHTNVALV	0.861275	YLHTNVALV	0.00700551	10.7614	HLA-A*02:01	-0.0205165	-2.15456	-2.13404	0.0073444	0.637366	0.668531	Yes
VMDSKIVQV	0.992557	VMDSKIVQV	0.000401102	10.7614	HLA-A*02:01	-0.0205165	-3.39674	-3.37623	0.000420505	0.637366	0.668531	Yes
SLINVNDLSFV	0.456955	SLINDLSFV	0.0176669	10.7614	HLA-A*02:01	-0.0205165	-1.75284	-1.73232	0.0185215	0.637366	0.668531	Yes
FIDKFTPPVV	0.244094	FIDKFPPVV	0.0263686	10.7614	HLA-A*02:01	-0.0205165	-1.57891	-1.5584	0.0276442	0.637366	0.668531	Yes
LLTAIVKL	0.076295	LL-TAIVKL	0.0451868	10.7614	HLA-A*02:01	-0.0205165	-1.34499	-1.32447	0.0473727	0.637366	0.668531	Yes
SMVDVVMLL	0.931672	SMVDVVMLL	0.00450704	10.7614	HLA-A*02:01	-0.0205165	-2.34611	-2.32559	0.00472507	0.637366	0.668531	Yes
KLDWHRFNL	0.693966	KLDWHRFNL	0.0114819	10.7614	HLA-A*02:01	-0.0205165	-1.93998	-1.91947	0.0120374	0.637366	0.668531	Yes
VLIGEFLEKV	0.679327	VLIGELEKV	0.0118524	10.7614	HLA-A*02:01	-0.0205165	-1.92619	-1.90568	0.0124258	0.637366	0.668531	Yes
TLWRGPVVV	0.906598	TLWRGPVVV	0.00543172	10.7614	HLA-A*02:01	-0.0205165	-2.26506	-2.24455	0.00569448	0.637366	0.668531	Yes
ALSDHHIYL	0.974883	ALSDHHIYL	0.00203001	10.7614	HLA-A*02:01	-0.0205165	-2.6925	-2.67199	0.00212821	0.637366	0.668531	Yes
GIMKKAYEL	0.4676	GIMKKAYEL	0.0173607	10.7614	HLA-A*02:01	-0.0205165	-1.76043	-1.73992	0.0182005	0.637366	0.668531	Yes
ALKDLINEA	0.714796	ALKDLINEA	0.0110073	10.7614	HLA-A*02:01	-0.0205165	-1.95832	-1.9378	0.0115398	0.637366	0.668531	Yes
FLVQNIHTL	0.983396	FLVQNIHTL	0.00127679	10.7614	HLA-A*02:01	-0.0205165	-2.89388	-2.87336	0.00133856	0.637366	0.668531	Yes
ALAEALKEV	0.979557	ALAEALKEV	0.00163809	10.7614	HLA-A*02:01	-0.0205165	-2.78566	-2.76515	0.00171733	0.637366	0.668531	Yes
ILINDAGEVRL	0.465548	ILINGEVRL	0.0174066	10.7614	HLA-A*02:01	-0.0205165	-1.75929	-1.73877	0.0182487	0.637366	0.668531	Yes
KLLSKFYEL	0.962703	KLLSKFYEL	0.0028414	10.7614	HLA-A*02:01	-0.0205165	-2.54647	-2.52595	0.00297885	0.637366	0.668531	Yes
RLFNDPVAMV	0.864046	RLFNDPVAV	0.00690141	10.7614	HLA-A*02:01	-0.0205165	-2.16106	-2.14055	0.00723526	0.637366	0.668531	Yes
RLLQETMYMTV	0.62426	RLLQETMTV	0.0131292	10.7614	HLA-A*02:01	-0.0205165	-1.88176	-1.86124	0.0137643	0.637366	0.668531	Yes
LLGPRLVLA	0.583565	LLGPRLVLA	0.014256	10.7614	HLA-A*02:01	-0.0205165	-1.846	-1.82549	0.0149456	0.637366	0.668531	Yes
FVDEFLTYL	0.979105	FVDEFLTYL	0.00168096	10.7614	HLA-A*02:01	-0.0205165	-2.77444	-2.75393	0.00176227	0.637366	0.668531	Yes
GLNEEIARV	0.968084	GLNEEIARV	0.00247397	10.7614	HLA-A*02:01	-0.0205165	-2.6066	-2.58609	0.00259365	0.637366	0.668531	Yes
FLIPKFFEL	0.994211	FLIPKFFEL	0.00024801	10.7614	HLA-A*02:01	-0.0205165	-3.60553	-3.58501	0.000260007	0.637366	0.668531	Yes
GLVDQLVKA	0.895654	GLVDQLVKA	0.0058267	10.7614	HLA-A*02:01	-0.0205165	-2.23458	-2.21406	0.00610856	0.637366	0.668531	Yes
YLMEGSYNKV	0.931621	YLMEGSYKV	0.00451929	10.7614	HLA-A*02:01	-0.0205165	-2.34493	-2.32441	0.00473791	0.637366	0.668531	Yes
RLQEEINEV	0.981797	RLQEEINEV	0.00142682	10.7614	HLA-A*02:01	-0.0205165	-2.84563	-2.82511	0.00149584	0.637366	0.668531	Yes
LFEDLVYL	0.325456	-LFEDLVYL	0.0222413	10.7614	HLA-A*02:01	-0.0205165	-1.65284	-1.63232	0.0233172	0.637366	0.668531	Yes
ILAAHVPTL	0.980368	ILAAHVPTL	0.00156461	10.7614	HLA-A*02:01	-0.0205165	-2.8056	-2.78508	0.00164029	0.637366	0.668531	Yes
FLFGEVHKA	0.985238	FLFGEVHKA	0.00106552	10.7614	HLA-A*02:01	-0.0205165	-2.97244	-2.95192	0.00111707	0.637366	0.668531	Yes
LLIENVASL	0.936729	LLIENVASL	0.00427128	10.7614	HLA-A*02:01	-0.0205165	-2.36944	-2.34893	0.0044779	0.637366	0.668531	Yes
YLDIINLFL	0.913779	YLDIINLFL	0.00517453	10.7614	HLA-A*02:01	-0.0205165	-2.28613	-2.26561	0.00542484	0.637366	0.668531	Yes
[truncated: 111,336 more rows]

## Sheet: NetMHCIIpan-4.0 Results
Peptide	Score_EL	Core	rank	info	allele	correction_factor	log_rank	information_corrected_log_rank	information_corrected_rank	corrected_auprc	uncorrected_auprc	Training Data Exists
AGEFGTLRAGRVANQ	0.984775	FGTLRAGRV	0.000832689	7.6119	HLA-DRB1*01:01	0.163687	-3.07952	-3.2432	0.000571211	0.386926	0.26402	Yes
AIITPVVFYR	5e-06	IITPVVFYR	0.978933	7.6119	HLA-DRB1*01:01	0.163687	-0.00924711	-0.172934	0.671531	0.386926	0.26402	Yes
AMAPRTLLL	0	AMAPRTLLL	0.993362	7.6119	HLA-DRB1*01:01	0.163687	-0.0028923	-0.166579	0.68143	0.386926	0.26402	Yes
APMYYRGAQAAIVVY	0.799876	YRGAQAAIV	0.0101027	7.6119	HLA-DRB1*01:01	0.163687	-1.99556	-2.15925	0.00693028	0.386926	0.26402	Yes
ASYEFVQRL	0	ASYEFVQRL	0.993362	7.6119	HLA-DRB1*01:01	0.163687	-0.00289262	-0.166579	0.681429	0.386926	0.26402	Yes
DARSYTAAVANRAK	0.983155	YTAAVANRA	0.000951325	7.6119	HLA-DRB1*01:01	0.163687	-3.02167	-3.18536	0.000652593	0.386926	0.26402	Yes
DVSLYGEIKAGVEGRNIQ	0.003636	YGEIKAGVE	0.345727	7.6119	HLA-DRB1*01:01	0.163687	-0.461266	-0.624953	0.237163	0.386926	0.26402	Yes
DVSLYGEIKAGVEGRNIQLQ	0.001248	YGEIKAGVE	0.505075	7.6119	HLA-DRB1*01:01	0.163687	-0.296644	-0.46033	0.346473	0.386926	0.26402	Yes
FPKPPSYNVATTLPSYDE	0.730717	YNVATTLPS	0.012841	7.6119	HLA-DRB1*01:01	0.163687	-1.8914	-2.05509	0.00880873	0.386926	0.26402	Yes
GACPKYVKQNTLKLATGMR	0.362371	YVKQNTLKL	0.031766	7.6119	HLA-DRB1*01:01	0.163687	-1.49804	-1.66172	0.021791	0.386926	0.26402	Yes
GEFGTLRAGRVANQ	0.962422	FGTLRAGRV	0.00250329	7.6119	HLA-DRB1*01:01	0.163687	-2.60149	-2.76518	0.00171722	0.386926	0.26402	Yes
GIGNYTQINAASVGLR	0.96241	YTQINAASV	0.00250404	7.6119	HLA-DRB1*01:01	0.163687	-2.60136	-2.76505	0.00171773	0.386926	0.26402	Yes
GIPVYRFVLPANAFA	0.750566	YRFVLPANA	0.0120755	7.6119	HLA-DRB1*01:01	0.163687	-1.9181	-2.08178	0.00828358	0.386926	0.26402	Yes
GPHSLRYFVTAVSRPGLG	0.451204	FVTAVSRPG	0.0258037	7.6119	HLA-DRB1*01:01	0.163687	-1.58832	-1.75201	0.0177009	0.386926	0.26402	Yes
GRIDKPILK	0	GRIDKPILK	0.993355	7.6119	HLA-DRB1*01:01	0.163687	-0.00289556	-0.166582	0.681425	0.386926	0.26402	Yes
IGNYTQINAASVGLR	0.969789	YTQINAASV	0.00197279	7.6119	HLA-DRB1*01:01	0.163687	-2.70492	-2.86861	0.0013533	0.386926	0.26402	Yes
ILDKKVEKV	1e-06	ILDKKVEKV	0.98629	7.6119	HLA-DRB1*01:01	0.163687	-0.00599549	-0.169682	0.676578	0.386926	0.26402	Yes
KALINADEL	1e-06	KALINADEL	0.986329	7.6119	HLA-DRB1*01:01	0.163687	-0.00597808	-0.169665	0.676605	0.386926	0.26402	Yes
KIPFLLLSGSPITNT	0.9782	FLLLSGSPI	0.00133036	7.6119	HLA-DRB1*01:01	0.163687	-2.87603	-3.03972	0.000912606	0.386926	0.26402	Yes
KPPKPVSKMRMATPLLMQA	0.541075	MRMATPLLM	0.0210239	7.6119	HLA-DRB1*01:01	0.163687	-1.67729	-1.84097	0.014422	0.386926	0.26402	Yes
KPVSKMRMATPLLMQAL	0.66594	MRMATPLLM	0.0154435	7.6119	HLA-DRB1*01:01	0.163687	-1.81125	-1.97494	0.010594	0.386926	0.26402	Yes
KPVSKMRMATPLLMQALP	0.62921	MRMATPLLM	0.0169672	7.6119	HLA-DRB1*01:01	0.163687	-1.77039	-1.93408	0.0116392	0.386926	0.26402	Yes
KPVSQMRMATPLLMRP	0.674717	MRMATPLLM	0.0150794	7.6119	HLA-DRB1*01:01	0.163687	-1.82161	-1.9853	0.0103442	0.386926	0.26402	Yes
KPVSQMRMATPLLMRPM	0.671224	MRMATPLLM	0.0152152	7.6119	HLA-DRB1*01:01	0.163687	-1.81772	-1.98141	0.0104374	0.386926	0.26402	Yes
KRYKSIVKY	0	KRYKSIVKY	0.99335	7.6119	HLA-DRB1*01:01	0.163687	-0.00289784	-0.166584	0.681421	0.386926	0.26402	Yes
LAGEFGTLRAGRVANQ	0.98049	FGTLRAGRV	0.00115577	7.6119	HLA-DRB1*01:01	0.163687	-2.93713	-3.10082	0.000792836	0.386926	0.26402	Yes
LAGEFGTLRAGRVANQFD	0.926387	FGTLRAGRV	0.00463724	7.6119	HLA-DRB1*01:01	0.163687	-2.33374	-2.49743	0.00318107	0.386926	0.26402	Yes
LEDPYEKIGAELVKE	0.99276	YEKIGAELV	0.000246225	7.6119	HLA-DRB1*01:01	0.163687	-3.60867	-3.77235	0.000168906	0.386926	0.26402	Yes
LLDVPTAAV	3e-06	LLDVPTAAV	0.982769	7.6119	HLA-DRB1*01:01	0.163687	-0.00754868	-0.171235	0.674163	0.386926	0.26402	Yes
LPKPPKPVSKMRMATPLLMQ	0.247298	MRMATPLLM	0.0430215	7.6119	HLA-DRB1*01:01	0.163687	-1.36631	-1.53	0.029512	0.386926	0.26402	Yes
LPKPPKPVSKMRMATPLLMQALP	0.489624	MRMATPLLM	0.0236332	7.6119	HLA-DRB1*01:01	0.163687	-1.62648	-1.79016	0.0162119	0.386926	0.26402	Yes
LPKPPKPVSKMRMATPLLMQALPM	0.508955	MRMATPLLM	0.0226206	7.6119	HLA-DRB1*01:01	0.163687	-1.6455	-1.80918	0.0155174	0.386926	0.26402	Yes
NGEEYLILSARDVLA	0.976483	YLILSARDV	0.00145721	7.6119	HLA-DRB1*01:01	0.163687	-2.83648	-3.00017	0.000999619	0.386926	0.26402	Yes
NPEKHIYSSITTWETTER	0.339369	YSSITTWET	0.0336642	7.6119	HLA-DRB1*01:01	0.163687	-1.47283	-1.63652	0.0230931	0.386926	0.26402	Yes
NPGGYVAYSKAATVTG	0.500474	VAYSKAATV	0.023078	7.6119	HLA-DRB1*01:01	0.163687	-1.6368	-1.80049	0.0158311	0.386926	0.26402	Yes
NPGGYVAYSKAATVTGKL	0.575971	VAYSKAATV	0.0193399	7.6119	HLA-DRB1*01:01	0.163687	-1.71355	-1.87723	0.0132668	0.386926	0.26402	Yes
PKYVKQNTLKLAT	0.861839	YVKQNTLKL	0.0075912	7.6119	HLA-DRB1*01:01	0.163687	-2.11969	-2.28338	0.00520744	0.386926	0.26402	Yes
RMATPLLMQALP	0.000116	ATPLLMQAL	0.864066	7.6119	HLA-DRB1*01:01	0.163687	-0.0634532	-0.22714	0.592735	0.386926	0.26402	Yes
RRYQKSTEL	1e-06	RRYQKSTEL	0.986341	7.6119	HLA-DRB1*01:01	0.163687	-0.00597282	-0.169659	0.676613	0.386926	0.26402	Yes
SMRYQSLIPRLVEFF	0.904931	YQSLIPRLV	0.00571616	7.6119	HLA-DRB1*01:01	0.163687	-2.2429	-2.40658	0.00392119	0.386926	0.26402	Yes
TNMKHMAGAAAAGA	0.905999	MKHMAGAAA	0.0056602	7.6119	HLA-DRB1*01:01	0.163687	-2.24717	-2.41085	0.0038828	0.386926	0.26402	Yes
TPKIQVYSRHPAEN	0.253104	IQVYSRHPA	0.0422784	7.6119	HLA-DRB1*01:01	0.163687	-1.37388	-1.53757	0.0290023	0.386926	0.26402	Yes
TPKIQVYSRHPAENGKS	0.338654	IQVYSRHPA	0.0337224	7.6119	HLA-DRB1*01:01	0.163687	-1.47208	-1.63577	0.023133	0.386926	0.26402	Yes
TSYDQIIAGVDYDFSKRTSAIVSGAWLKRNTG	0.019483	FSKRTSAIV	0.172081	7.6119	HLA-DRB1*01:01	0.163687	-0.764267	-0.927954	0.118045	0.386926	0.26402	Yes
TTAYFLYQQQGRLDK	0.341526	FLYQQQGRL	0.0335016	7.6119	HLA-DRB1*01:01	0.163687	-1.47493	-1.63862	0.0229815	0.386926	0.26402	Yes
VDDTQFVRFDSDAASQR	0.841298	FVRFDSDAA	0.00844777	7.6119	HLA-DRB1*01:01	0.163687	-2.07326	-2.23694	0.00579503	0.386926	0.26402	Yes
VGSDWRFLRGYHQYA	0.754679	WRFLRGYHQ	0.0119024	7.6119	HLA-DRB1*01:01	0.163687	-1.92437	-2.08805	0.00816483	0.386926	0.26402	Yes
YLLPAIVHI	3e-06	YLLPAIVHI	0.982904	7.6119	HLA-DRB1*01:01	0.163687	-0.007489	-0.171176	0.674255	0.386926	0.26402	Yes
YTQINAASVGLRHKF	0.015809	INAASVGLR	0.188978	7.6119	HLA-DRB1*01:01	0.163687	-0.723589	-0.887275	0.129636	0.386926	0.26402	Yes
DVGVYRAVTPQGRP	0.557635	YRAVTPQGR	0.0202255	7.6119	HLA-DRB1*01:01	0.163687	-1.6941	-1.85779	0.0138744	0.386926	0.26402	Yes
GELIGTLNAAKVPAD	0.967472	IGTLNAAKV	0.00214216	7.6119	HLA-DRB1*01:01	0.163687	-2.66915	-2.83283	0.00146949	0.386926	0.26402	Yes
LEEFGRFASFEAQG	0.465462	FGRFASFEA	0.024965	7.6119	HLA-DRB1*01:01	0.163687	-1.60267	-1.76635	0.0171256	0.386926	0.26402	Yes
KPPKPVSKMRMATPLLMQALP	0.459682	MRMATPLLM	0.0252911	7.6119	HLA-DRB1*01:01	0.163687	-1.59703	-1.76072	0.0173492	0.386926	0.26402	Yes
PKPPKPVSKMRMATPLLMQALP	0.476322	MRMATPLLM	0.0243726	7.6119	HLA-DRB1*01:01	0.163687	-1.6131	-1.77679	0.0167192	0.386926	0.26402	Yes
DSDVGEYRAVTELGRPD	0.690977	YRAVTELGR	0.0143669	7.6119	HLA-DRB1*01:01	0.163687	-1.84264	-2.00632	0.00985543	0.386926	0.26402	Yes
DVGEYRAVTELGRPD	0.770169	YRAVTELGR	0.0113047	7.6119	HLA-DRB1*01:01	0.163687	-1.94674	-2.11043	0.00775485	0.386926	0.26402	Yes
KMRMATPLLMQALPM	0.260882	MRMATPLLM	0.0413614	7.6119	HLA-DRB1*01:01	0.163687	-1.38341	-1.54709	0.0283732	0.386926	0.26402	Yes
SDVGEYRAVTELGRPD	0.732649	YRAVTELGR	0.0127627	7.6119	HLA-DRB1*01:01	0.163687	-1.89406	-2.05774	0.00875498	0.386926	0.26402	Yes
SDVGEYRAVTELGRPDA	0.753892	YRAVTELGR	0.0119352	7.6119	HLA-DRB1*01:01	0.163687	-1.92317	-2.08686	0.00818735	0.386926	0.26402	Yes
FQDAYVLLSEKKISS	0.846988	YVLLSEKKI	0.00822094	7.6119	HLA-DRB1*01:01	0.163687	-2.08508	-2.24877	0.00563943	0.386926	0.26402	Yes
IYFRNQKGHSGLQPTGFLS	0.022397	FRNQKGHSG	0.161671	7.6119	HLA-DRB1*01:01	0.163687	-0.791368	-0.955055	0.110903	0.386926	0.26402	Yes
LPKPPKPVSKMRMATPLLMQA	0.397533	MRMATPLLM	0.0291941	7.6119	HLA-DRB1*01:01	0.163687	-1.5347	-1.69839	0.0200267	0.386926	0.26402	Yes
LPSYEEALSLPSK	0.531092	YEEALSLPS	0.0215141	7.6119	HLA-DRB1*01:01	0.163687	-1.66728	-1.83096	0.0147583	0.386926	0.26402	Yes
RVEYHFLSPYVSPKESP	0.945873	YHFLSPYVS	0.00353669	7.6119	HLA-DRB1*01:01	0.163687	-2.4514	-2.61509	0.00242611	0.386926	0.26402	Yes
VDDTQFVRFDSDAASPR	0.855082	FVRFDSDAA	0.00788667	7.6119	HLA-DRB1*01:01	0.163687	-2.10311	-2.26679	0.00541012	0.386926	0.26402	Yes
IVTPRTPPPSQG	9.1e-05	VTPRTPPPS	0.886653	7.6119	HLA-DRB1*01:01	0.163687	-0.0522464	-0.215933	0.608229	0.386926	0.26402	Yes
KIFEFKETL	0	KIFEFKETL	0.993345	7.6119	HLA-DRB1*01:01	0.163687	-0.0028998	-0.166586	0.681418	0.386926	0.26402	Yes
DVVYALKRQGRTLYGFGG	0.000472	YALKRQGRT	0.668901	7.6119	HLA-DRB1*01:01	0.163687	-0.174638	-0.338325	0.458855	0.386926	0.26402	Yes
APQGSLGEYLFERLTLKHD	0.000638	YLFERLTLK	0.618252	7.6119	HLA-DRB1*01:01	0.163687	-0.208834	-0.372521	0.424111	0.386926	0.26402	Yes
DAYVLLSEKKISS	0.768643	YVLLSEKKI	0.0113696	7.6119	HLA-DRB1*01:01	0.163687	-1.94425	-2.10794	0.00779938	0.386926	0.26402	Yes
PEPAKSAPAPKKGSKKAV	0.000516	AKSAPAPKK	0.654192	7.6119	HLA-DRB1*01:01	0.163687	-0.184295	-0.347981	0.448765	0.386926	0.26402	Yes
AAVGTSAAPVPSDNH	0.003998	GTSAAPVPS	0.333425	7.6119	HLA-DRB1*01:01	0.163687	-0.477002	-0.640689	0.228724	0.386926	0.26402	Yes
AGEYDHLPEQAF	0.028288	YDHLPEQAF	0.144998	7.6119	HLA-DRB1*01:01	0.163687	-0.838639	-1.00233	0.0994659	0.386926	0.26402	Yes
AQVIILNHPGQISAG	0.461299	IILNHPGQI	0.0251985	7.6119	HLA-DRB1*01:01	0.163687	-1.59862	-1.76231	0.0172858	0.386926	0.26402	Yes
ASVDLKNTGREEF	0.000156	VDLKNTGRE	0.830963	7.6119	HLA-DRB1*01:01	0.163687	-0.0804181	-0.244105	0.570027	0.386926	0.26402	Yes
DVASVQQQRQEQSY	0.000651	VQQQRQEQS	0.61459	7.6119	HLA-DRB1*01:01	0.163687	-0.211415	-0.375101	0.421598	0.386926	0.26402	Yes
EPGEPEFKYIGNMHGNE	0.674024	FKYIGNMHG	0.0151085	7.6119	HLA-DRB1*01:01	0.163687	-1.82078	-1.98446	0.0103642	0.386926	0.26402	Yes
ERTAKELDTNT	5.1e-05	RTAKELDTN	0.925916	7.6119	HLA-DRB1*01:01	0.163687	-0.0334284	-0.197115	0.635163	0.386926	0.26402	Yes
FITADHLIEKLRT	0.000178	ITADHLIEK	0.814942	7.6119	HLA-DRB1*01:01	0.163687	-0.0888731	-0.25256	0.559037	0.386926	0.26402	Yes
FRDGDILGKYVD	0.000233	DGDILGKYV	0.779096	7.6119	HLA-DRB1*01:01	0.163687	-0.108409	-0.272095	0.534447	0.386926	0.26402	Yes
FRDQEGQDVLL	0.000591	FRDQEGQDV	0.631078	7.6119	HLA-DRB1*01:01	0.163687	-0.199917	-0.363603	0.432909	0.386926	0.26402	Yes
FSETGAGKHVPRA	0.000108	SETGAGKHV	0.870386	7.6119	HLA-DRB1*01:01	0.163687	-0.0602883	-0.223975	0.59707	0.386926	0.26402	Yes
GKVNVDEVGGEALGRL	0.034515	VDEVGGEAL	0.132022	7.6119	HLA-DRB1*01:01	0.163687	-0.879355	-1.04304	0.0905645	0.386926	0.26402	Yes
GKVNVDEVGGEALGRLL	0.019304	VDEVGGEAL	0.172808	7.6119	HLA-DRB1*01:01	0.163687	-0.762435	-0.926122	0.118544	0.386926	0.26402	Yes
GRTLQNTMVN	2.5e-05	RTLQNTMVN	0.954816	7.6119	HLA-DRB1*01:01	0.163687	-0.0200802	-0.183767	0.654988	0.386926	0.26402	Yes
GRTTGIVMDSGD	0.000157	RTTGIVMDS	0.830172	7.6119	HLA-DRB1*01:01	0.163687	-0.0808321	-0.244519	0.569484	0.386926	0.26402	Yes
IREADIDGDGQVN	0.000114	ADIDGDGQV	0.865183	7.6119	HLA-DRB1*01:01	0.163687	-0.0628918	-0.226578	0.593501	0.386926	0.26402	Yes
ISKQEYDESGPSIVHR	0.12872	YDESGPSIV	0.0658586	7.6119	HLA-DRB1*01:01	0.163687	-1.18139	-1.34507	0.0451779	0.386926	0.26402	Yes
KPTISVKEAFY	3.8e-05	TISVKEAFY	0.939682	7.6119	HLA-DRB1*01:01	0.163687	-0.027019	-0.190706	0.644606	0.386926	0.26402	Yes
KVVPEMTEILKKK	0.02352	VVPEMTEIL	0.15805	7.6119	HLA-DRB1*01:01	0.163687	-0.801206	-0.964893	0.108419	0.386926	0.26402	Yes
KYLPGPLQDMFK	0.001035	YLPGPLQDM	0.536104	7.6119	HLA-DRB1*01:01	0.163687	-0.270751	-0.434437	0.367758	0.386926	0.26402	Yes
LASVSTVLTSKY	0.000147	VSTVLTSKY	0.838435	7.6119	HLA-DRB1*01:01	0.163687	-0.0765305	-0.240217	0.575152	0.386926	0.26402	Yes
LGVLESDLPS	4e-06	GVLESDLPS	0.980979	7.6119	HLA-DRB1*01:01	0.163687	-0.00834008	-0.172027	0.672935	0.386926	0.26402	Yes
LLVPTKARFPAFEL	0.000619	LVPTKARFP	0.623128	7.6119	HLA-DRB1*01:01	0.163687	-0.205423	-0.36911	0.427455	0.386926	0.26402	Yes
LNETGDEPFQYKN	0.000146	ETGDEPFQY	0.838659	7.6119	HLA-DRB1*01:01	0.163687	-0.0764146	-0.240101	0.575306	0.386926	0.26402	Yes
LSFPTTKTYFPHF	2.2e-05	PTTKTYFPH	0.957939	7.6119	HLA-DRB1*01:01	0.163687	-0.0186619	-0.182348	0.65713	0.386926	0.26402	Yes
LVSASQDGKL	8e-06	VSASQDGKL	0.974487	7.6119	HLA-DRB1*01:01	0.163687	-0.0112241	-0.174911	0.668481	0.386926	0.26402	Yes
MLSNPDLMRQ	2e-06	MLSNPDLMR	0.985443	7.6119	HLA-DRB1*01:01	0.163687	-0.00636855	-0.170055	0.675997	0.386926	0.26402	Yes
MSILGMTPGFGDKTF	0.03232	ILGMTPGFG	0.1362	7.6119	HLA-DRB1*01:01	0.163687	-0.865823	-1.02951	0.0934308	0.386926	0.26402	Yes
PKFEVIEKPQA	0.010343	FEVIEKPQA	0.226879	7.6119	HLA-DRB1*01:01	0.163687	-0.644205	-0.807891	0.155635	0.386926	0.26402	Yes
PVDLSKWSGPLSL	0.001886	LSKWSGPLS	0.439202	7.6119	HLA-DRB1*01:01	0.163687	-0.357336	-0.521022	0.301285	0.386926	0.26402	Yes
QEELPSLWNSRVGF	0.001078	LPSLWNSRV	0.529313	7.6119	HLA-DRB1*01:01	0.163687	-0.276287	-0.439974	0.3631	0.386926	0.26402	Yes
SVAALSCLMLVA	0.000212	VAALSCLML	0.791796	7.6119	HLA-DRB1*01:01	0.163687	-0.101387	-0.265073	0.543158	0.386926	0.26402	Yes
TNVPRASVPDGFLSEL	0.000454	PRASVPDGF	0.675381	7.6119	HLA-DRB1*01:01	0.163687	-0.170451	-0.334138	0.4633	0.386926	0.26402	Yes
TSPAKQQAPPVRNLHQ	0.006181	PAKQQAPPV	0.281078	7.6119	HLA-DRB1*01:01	0.163687	-0.551173	-0.71486	0.192815	0.386926	0.26402	Yes
VDLEPTVIDEVR	0.000751	LEPTVIDEV	0.590327	7.6119	HLA-DRB1*01:01	0.163687	-0.228907	-0.392594	0.404955	0.386926	0.26402	Yes
VDPENFRLLGNVL	0.001662	NFRLLGNVL	0.458702	7.6119	HLA-DRB1*01:01	0.163687	-0.338469	-0.502156	0.314662	0.386926	0.26402	Yes
VDWIILQCAEDI	0.018642	WIILQCAED	0.175536	7.6119	HLA-DRB1*01:01	0.163687	-0.755633	-0.91932	0.120415	0.386926	0.26402	Yes
VEESKDAGIRTL	0.000144	ESKDAGIRT	0.840513	7.6119	HLA-DRB1*01:01	0.163687	-0.0754555	-0.239142	0.576578	0.386926	0.26402	Yes
VHLKNASRGSAGN	0.000448	LKNASRGSA	0.677451	7.6119	HLA-DRB1*01:01	0.163687	-0.169122	-0.332809	0.46472	0.386926	0.26402	Yes
VTPRTPPPSQGKGRGL	9.3e-05	PRTPPPSQG	0.884128	7.6119	HLA-DRB1*01:01	0.163687	-0.0534849	-0.217171	0.606497	0.386926	0.26402	Yes
WISKQEYDESGPSIVHRK	0.154727	YDESGPSIV	0.058924	7.6119	HLA-DRB1*01:01	0.163687	-1.22971	-1.39339	0.0404208	0.386926	0.26402	Yes
WVPYINGKFKKDN	0.000506	YINGKFKKD	0.657538	7.6119	HLA-DRB1*01:01	0.163687	-0.182079	-0.345766	0.45106	0.386926	0.26402	Yes
WVSQRTATAGTASPP	0.009645	QRTATAGTA	0.233718	7.6119	HLA-DRB1*01:01	0.163687	-0.631308	-0.794995	0.160326	0.386926	0.26402	Yes
YDESGPSIVHR	7.9e-05	YDESGPSIV	0.897707	7.6119	HLA-DRB1*01:01	0.163687	-0.0468655	-0.210552	0.615812	0.386926	0.26402	Yes
YDNEFGYSNRVVDL	0.001401	NEFGYSNRV	0.486002	7.6119	HLA-DRB1*01:01	0.163687	-0.313362	-0.477048	0.33339	0.386926	0.26402	Yes
YEMPSEEGYQD	8e-06	YEMPSEEGY	0.975019	7.6119	HLA-DRB1*01:01	0.163687	-0.0109868	-0.174673	0.668847	0.386926	0.26402	Yes
ARTKQTARKSTGGKAPRKQLA	0.000567	ARKSTGGKA	0.638282	7.6119	HLA-DRB1*01:01	0.163687	-0.194987	-0.358674	0.437851	0.386926	0.26402	Yes
LPKKTESHHKAKGK	0.000115	KKTESHHKA	0.864356	7.6119	HLA-DRB1*01:01	0.163687	-0.0633074	-0.226994	0.592934	0.386926	0.26402	Yes
TDQAQKAEGAGDAK	0.004132	DQAQKAEGA	0.329077	7.6119	HLA-DRB1*01:01	0.163687	-0.482702	-0.646389	0.225741	0.386926	0.26402	Yes
IQTAVRLLLPGELAK	0.453669	VRLLLPGEL	0.025644	7.6119	HLA-DRB1*01:01	0.163687	-1.59101	-1.7547	0.0175913	0.386926	0.26402	Yes
KVLKQVHPDTGISSK	0.009676	LKQVHPDTG	0.233431	7.6119	HLA-DRB1*01:01	0.163687	-0.631842	-0.795529	0.160129	0.386926	0.26402	Yes
NDIFERIAGEASRLA	0.943375	FERIAGEAS	0.00368816	7.6119	HLA-DRB1*01:01	0.163687	-2.43319	-2.59688	0.00253001	0.386926	0.26402	Yes
AAAGYDVEKNNSRIKL	0.080946	YDVEKNNSR	0.0854536	7.6119	HLA-DRB1*01:01	0.163687	-1.06827	-1.23196	0.0586197	0.386926	0.26402	Yes
HPQSWVHQIALRM	0.250308	WVHQIALRM	0.0426477	7.6119	HLA-DRB1*01:01	0.163687	-1.3701	-1.53379	0.0292556	0.386926	0.26402	Yes
VPPVQVSPLIKLGRYSAL	0.003437	VQVSPLIKL	0.35324	7.6119	HLA-DRB1*01:01	0.163687	-0.45193	-0.615617	0.242317	0.386926	0.26402	Yes
AASSYLSLTPEQWKSH	0.60409	YLSLTPEQW	0.0180341	7.6119	HLA-DRB1*01:01	0.163687	-1.7439	-1.90759	0.0123711	0.386926	0.26402	Yes
LPKPPKPVSKMRM	4.9e-05	PKPVSKMRM	0.927961	7.6119	HLA-DRB1*01:01	0.163687	-0.0324702	-0.196157	0.636566	0.386926	0.26402	Yes
DSYEDISAYLLSKNNAIEPR	0.335304	YLLSKNNAI	0.0339836	7.6119	HLA-DRB1*01:01	0.163687	-1.46873	-1.63242	0.0233122	0.386926	0.26402	Yes
KPSKPKTNMKHMAGAAAAG	0.783676	MKHMAGAAA	0.0107347	7.6119	HLA-DRB1*01:01	0.163687	-1.96921	-2.1329	0.00736381	0.386926	0.26402	Yes
VGSDWRFLRGYHQYAYDG	0.450827	WRFLRGYHQ	0.0258253	7.6119	HLA-DRB1*01:01	0.163687	-1.58795	-1.75164	0.0177157	0.386926	0.26402	Yes
GRLTKHTKF	0	GRLTKHTKF	0.993421	7.6119	HLA-DRB1*01:01	0.163687	-0.00286653	-0.166553	0.68147	0.386926	0.26402	Yes
NGNFIAPEYAYKIVK	0.761009	IAPEYAYKI	0.0116457	7.6119	HLA-DRB1*01:01	0.163687	-1.93383	-2.09752	0.00798876	0.386926	0.26402	Yes
SDWRFLRGYHQYAYD	0.470744	WRFLRGYHQ	0.0246763	7.6119	HLA-DRB1*01:01	0.163687	-1.60772	-1.77141	0.0169275	0.386926	0.26402	Yes
EDITKYFMKLGGSGSPHHHH	0.276435	FMKLGGSGS	0.0396199	7.6119	HLA-DRB1*01:01	0.163687	-1.40209	-1.56577	0.0271786	0.386926	0.26402	Yes
INSSLPYQNIHPVTIGECPK	0.192844	YQNIHPVTI	0.0511395	7.6119	HLA-DRB1*01:01	0.163687	-1.29124	-1.45493	0.0350808	0.386926	0.26402	Yes
LPSENERGYYIPHQSSLPQDNRGNSRDSKE	0.011586	YYIPHQSSL	0.216331	7.6119	HLA-DRB1*01:01	0.163687	-0.664882	-0.828569	0.148399	0.386926	0.26402	Yes
SNGNFIAPEYAYKIVK	0.654986	IAPEYAYKI	0.0159062	7.6119	HLA-DRB1*01:01	0.163687	-1.79843	-1.96212	0.0109114	0.386926	0.26402	Yes
SNGNFIAPEYAYKIVKKGDS	0.356413	IAPEYAYKI	0.0322384	7.6119	HLA-DRB1*01:01	0.163687	-1.49163	-1.65531	0.022115	0.386926	0.26402	Yes
YDNFQDEENIGIYK	0.235913	FQDEENIGI	0.0445548	7.6119	HLA-DRB1*01:01	0.163687	-1.35111	-1.51479	0.0305639	0.386926	0.26402	Yes
YDNFQDEENIGIYKE	0.382991	FQDEENIGI	0.0302186	7.6119	HLA-DRB1*01:01	0.163687	-1.51973	-1.68341	0.0207294	0.386926	0.26402	Yes
APMYYRGAQAAIVVYD	0.899822	YRGAQAAIV	0.00597134	7.6119	HLA-DRB1*01:01	0.163687	-2.22393	-2.38762	0.00409624	0.386926	0.26402	Yes
GQNAWFLPAQADIVATK	0.880475	FLPAQADIV	0.00680477	7.6119	HLA-DRB1*01:01	0.163687	-2.16719	-2.33087	0.00466796	0.386926	0.26402	Yes
SDWRFLRGYHQYA	0.58451	WRFLRGYHQ	0.0189146	7.6119	HLA-DRB1*01:01	0.163687	-1.7232	-1.88689	0.0129751	0.386926	0.26402	Yes
VPDHVVWSLFNTL	0.000385	VVWSLFNTL	0.702475	7.6119	HLA-DRB1*01:01	0.163687	-0.153369	-0.317056	0.481886	0.386926	0.26402	Yes
GTRIIEVSGQKIK	0.829244	IIEVSGQKI	0.00894395	7.6119	HLA-DRB1*01:01	0.163687	-2.04847	-2.21216	0.0061354	0.386926	0.26402	Yes
SAPGLIIATGSVGKNL	0.689545	LIIATGSVG	0.0144281	7.6119	HLA-DRB1*01:01	0.163687	-1.84079	-2.00448	0.0098974	0.386926	0.26402	Yes
ASGNYATVISHNPETK	0.168701	YATVISHNP	0.0558238	7.6119	HLA-DRB1*01:01	0.163687	-1.25318	-1.41687	0.0382942	0.386926	0.26402	Yes
DRVYIHPFHL	0.000145	RVYIHPFHL	0.839906	7.6119	HLA-DRB1*01:01	0.163687	-0.0757694	-0.239456	0.576161	0.386926	0.26402	Yes
DVPKWISIMTERSVPH	0.630462	WISIMTERS	0.0169209	7.6119	HLA-DRB1*01:01	0.163687	-1.77158	-1.93526	0.0116075	0.386926	0.26402	Yes
GRMHAPGKGLSQSALPYR	0.000444	GKGLSQSAL	0.679086	7.6119	HLA-DRB1*01:01	0.163687	-0.168075	-0.331762	0.465841	0.386926	0.26402	Yes
LGEYKFQNALLVRYT	0.98739	YKFQNALLV	0.000623025	7.6119	HLA-DRB1*01:01	0.163687	-3.20549	-3.36918	0.000427384	0.386926	0.26402	Yes
QLGEYKFQNALLVRYT	0.986153	YKFQNALLV	0.000723753	7.6119	HLA-DRB1*01:01	0.163687	-3.14041	-3.3041	0.000496482	0.386926	0.26402	Yes
QLGEYKFQNALLVRYTK	0.972991	YKFQNALLV	0.00173701	7.6119	HLA-DRB1*01:01	0.163687	-2.7602	-2.92388	0.00119156	0.386926	0.26402	Yes
QVTQPTVGMNFKTPRGPV	0.000253	PTVGMNFKT	0.767248	7.6119	HLA-DRB1*01:01	0.163687	-0.115064	-0.278751	0.526319	0.386926	0.26402	Yes
KEITALAPSTMKIK	0.756793	ITALAPSTM	0.0118196	7.6119	HLA-DRB1*01:01	0.163687	-1.9274	-2.09109	0.00810802	0.386926	0.26402	Yes
MRMATPLLMQALPM	0.020716	PLLMQALPM	0.16751	7.6119	HLA-DRB1*01:01	0.163687	-0.775959	-0.939646	0.114909	0.386926	0.26402	Yes
TPSYVAFTDTERLIG	0.49227	YVAFTDTER	0.0234899	7.6119	HLA-DRB1*01:01	0.163687	-1.62912	-1.79281	0.0161137	0.386926	0.26402	Yes
KRFEGLTQR	0	KRFEGLTQR	0.993424	7.6119	HLA-DRB1*01:01	0.163687	-0.00286522	-0.166552	0.681472	0.386926	0.26402	Yes
RRFGDKLNF	0	RRFGDKLNF	0.993424	7.6119	HLA-DRB1*01:01	0.163687	-0.00286555	-0.166552	0.681472	0.386926	0.26402	Yes
RRMGPPVGGHR	1.6e-05	RMGPPVGGH	0.964212	7.6119	HLA-DRB1*01:01	0.163687	-0.0158277	-0.179514	0.661433	0.386926	0.26402	Yes
AASSYLSLTPEQWK	0.47698	YLSLTPEQW	0.0243375	7.6119	HLA-DRB1*01:01	0.163687	-1.61372	-1.77741	0.0166951	0.386926	0.26402	Yes
AEGTWVDMTGARIAYK	0.989017	WVDMTGARI	0.000500658	7.6119	HLA-DRB1*01:01	0.163687	-3.30046	-3.46415	0.000343443	0.386926	0.26402	Yes
AKNSLYLQMNSLRAEDT	0.914292	YLQMNSLRA	0.00524758	7.6119	HLA-DRB1*01:01	0.163687	-2.28004	-2.44373	0.00359975	0.386926	0.26402	Yes
ALATISTLEAVRGRPF	0.828306	ISTLEAVRG	0.00897603	7.6119	HLA-DRB1*01:01	0.163687	-2.04692	-2.2106	0.00615741	0.386926	0.26402	Yes
ALERMFLSFPTTKTYFPH	0.307759	FLSFPTTKT	0.03641	7.6119	HLA-DRB1*01:01	0.163687	-1.43878	-1.60247	0.0249767	0.386926	0.26402	Yes
ALTNGIYPHKLVF	0.000365	TNGIYPHKL	0.711163	7.6119	HLA-DRB1*01:01	0.163687	-0.148031	-0.311718	0.487846	0.386926	0.26402	Yes
APSNLRFLATTPNSLL	0.277998	LRFLATTPN	0.039452	7.6119	HLA-DRB1*01:01	0.163687	-1.40393	-1.56762	0.0270634	0.386926	0.26402	Yes
ASHFEQMAAASMHR	0.966094	FEQMAAASM	0.0022399	7.6119	HLA-DRB1*01:01	0.163687	-2.64977	-2.81346	0.00153654	0.386926	0.26402	Yes
DDDGTGQKQIWRIEGSNKVPVDPA	0.868513	WRIEGSNKV	0.00729797	7.6119	HLA-DRB1*01:01	0.163687	-2.1368	-2.30048	0.00500628	0.386926	0.26402	Yes
DEPQYLDLPSTATSVN	0.875118	YLDLPSTAT	0.00703085	7.6119	HLA-DRB1*01:01	0.163687	-2.15299	-2.31668	0.00482305	0.386926	0.26402	Yes
DHPTFNKITPNLAEF	0.939121	FNKITPNLA	0.00393587	7.6119	HLA-DRB1*01:01	0.163687	-2.40496	-2.56865	0.00269994	0.386926	0.26402	Yes
DIRPEIHENYRING	0.00488	PEIHENYRI	0.308633	7.6119	HLA-DRB1*01:01	0.163687	-0.510558	-0.674244	0.211717	0.386926	0.26402	Yes
DPENFRLLGNVLV	0.705911	FRLLGNVLV	0.0138125	7.6119	HLA-DRB1*01:01	0.163687	-1.85973	-2.02341	0.00947514	0.386926	0.26402	Yes
EGQYARLISPPVH	0.970415	YARLISPPV	0.00193548	7.6119	HLA-DRB1*01:01	0.163687	-2.71321	-2.8769	0.00132771	0.386926	0.26402	Yes
EQLGEYKFQNALLVRYTK	0.9578	YKFQNALLV	0.00278533	7.6119	HLA-DRB1*01:01	0.163687	-2.55512	-2.71881	0.00191069	0.386926	0.26402	Yes
ERDALNIETAIKTKG	0.952322	LNIETAIKT	0.00314348	7.6119	HLA-DRB1*01:01	0.163687	-2.50259	-2.66628	0.00215637	0.386926	0.26402	Yes
FAYYHGLLGNRLWSS	0.928858	YHGLLGNRL	0.00450294	7.6119	HLA-DRB1*01:01	0.163687	-2.3465	-2.51019	0.00308894	0.386926	0.26402	Yes
FEPFFMMIATPAPH	0.976027	FFMMIATPA	0.00148705	7.6119	HLA-DRB1*01:01	0.163687	-2.82767	-2.99136	0.00102009	0.386926	0.26402	Yes
GAYYLKLENQSLKS	0.947284	YLKLENQSL	0.00345088	7.6119	HLA-DRB1*01:01	0.163687	-2.46207	-2.62576	0.00236725	0.386926	0.26402	Yes
GFWEALGGKAAYR	0.938076	WEALGGKAA	0.00397393	7.6119	HLA-DRB1*01:01	0.163687	-2.40078	-2.56447	0.00272605	0.386926	0.26402	Yes
GGGYVKLFPNSLDQ	0.986839	YVKLFPNSL	0.000667793	7.6119	HLA-DRB1*01:01	0.163687	-3.17536	-3.33904	0.000458095	0.386926	0.26402	Yes
GGGYVKLFPNSLDQT	0.98595	YVKLFPNSL	0.000737184	7.6119	HLA-DRB1*01:01	0.163687	-3.13242	-3.29611	0.000505696	0.386926	0.26402	Yes
GGQDILSMMGQLMKPK	0.943356	ILSMMGQLM	0.00369114	7.6119	HLA-DRB1*01:01	0.163687	-2.43284	-2.59653	0.00253206	0.386926	0.26402	Yes
GGQFLRAVAQRCPSPP	0.978825	FLRAVAQRC	0.00127963	7.6119	HLA-DRB1*01:01	0.163687	-2.89292	-3.0566	0.000877801	0.386926	0.26402	Yes
GKPQYMVLVPSLLHTE	0.948514	YMVLVPSLL	0.00336806	7.6119	HLA-DRB1*01:01	0.163687	-2.47262	-2.63631	0.00231043	0.386926	0.26402	Yes
GLLWIALHGNQITS	0.987082	WIALHGNQI	0.000643916	7.6119	HLA-DRB1*01:01	0.163687	-3.19117	-3.35486	0.000441716	0.386926	0.26402	Yes
GLLWIALHGNQITSD	0.99268	WIALHGNQI	0.00024921	7.6119	HLA-DRB1*01:01	0.163687	-3.60343	-3.76712	0.000170954	0.386926	0.26402	Yes
GPDPSSPAFRIEDANLIPPVPD	0.946242	FRIEDANLI	0.00351431	7.6119	HLA-DRB1*01:01	0.163687	-2.45416	-2.61785	0.00241076	0.386926	0.26402	Yes
GPRAEEYEFLTPVEEAPK	0.900062	YEFLTPVEE	0.00596238	7.6119	HLA-DRB1*01:01	0.163687	-2.22458	-2.38827	0.00409009	0.386926	0.26402	Yes
GPRPEEYEFLTPVEEAPK	0.920524	YEFLTPVEE	0.00494838	7.6119	HLA-DRB1*01:01	0.163687	-2.30554	-2.46922	0.00339451	0.386926	0.26402	Yes
GPRSYTIAVASLGKG	0.972886	YTIAVASLG	0.0017482	7.6119	HLA-DRB1*01:01	0.163687	-2.75741	-2.9211	0.00119924	0.386926	0.26402	Yes
GQKQIWRIEGSNKVPVDPA	0.92883	WRIEGSNKV	0.00450518	7.6119	HLA-DRB1*01:01	0.163687	-2.34629	-2.50997	0.00309048	0.386926	0.26402	Yes
HPVTGQFLYQDSNWASKVE	0.738842	FLYQDSNWA	0.0125336	7.6119	HLA-DRB1*01:01	0.163687	-1.90192	-2.06561	0.00859785	0.386926	0.26402	Yes
HRSFVDLSGHNLANPHP	0.988983	FVDLSGHNL	0.00050215	7.6119	HLA-DRB1*01:01	0.163687	-3.29917	-3.46285	0.000344467	0.386926	0.26402	Yes
IHSLPPEGKLGIMEL	8e-05	IHSLPPEGK	0.896566	7.6119	HLA-DRB1*01:01	0.163687	-0.0474177	-0.211104	0.615029	0.386926	0.26402	Yes
IKAAYLQETGKPLDE	0.989712	YLQETGKPL	0.000449921	7.6119	HLA-DRB1*01:01	0.163687	-3.34686	-3.51055	0.000308638	0.386926	0.26402	Yes
IKIISKIENHEGVR	0.066728	ISKIENHEG	0.0946199	7.6119	HLA-DRB1*01:01	0.163687	-1.02402	-1.1877	0.0649077	0.386926	0.26402	Yes
INEYWVLTAAHVVE	0.974672	YWVLTAAHV	0.00160046	7.6119	HLA-DRB1*01:01	0.163687	-2.79575	-2.95944	0.00109789	0.386926	0.26402	Yes
ISTPEELGLDKV	9.7e-05	PEELGLDKV	0.881034	7.6119	HLA-DRB1*01:01	0.163687	-0.0550071	-0.218694	0.604375	0.386926	0.26402	Yes
IVHRYMTITSERSVPA	0.769928	YMTITSERS	0.0113159	7.6119	HLA-DRB1*01:01	0.163687	-1.94631	-2.11	0.00776253	0.386926	0.26402	Yes
KGPMFELLPGESNKIPR	0.824849	FELLPGESN	0.00912824	7.6119	HLA-DRB1*01:01	0.163687	-2.03961	-2.2033	0.00626182	0.386926	0.26402	Yes
KNSLYLQMNSLRAEDT	0.949945	YLQMNSLRA	0.00327405	7.6119	HLA-DRB1*01:01	0.163687	-2.48491	-2.6486	0.00224594	0.386926	0.26402	Yes
KPQYMVLVPSLLHT	0.941232	YMVLVPSLL	0.0038053	7.6119	HLA-DRB1*01:01	0.163687	-2.41961	-2.5833	0.00261037	0.386926	0.26402	Yes
LINEYWVLTAAHVVE	0.970808	YWVLTAAHV	0.00190116	7.6119	HLA-DRB1*01:01	0.163687	-2.72098	-2.88467	0.00130416	0.386926	0.26402	Yes
LINEYWVLTAAHVVEG	0.97585	YWVLTAAHV	0.00150197	7.6119	HLA-DRB1*01:01	0.163687	-2.82334	-2.98702	0.00103033	0.386926	0.26402	Yes
LMHPDALEEPDDQNRI	0.00011	DALEEPDDQ	0.868784	7.6119	HLA-DRB1*01:01	0.163687	-0.061088	-0.224775	0.595971	0.386926	0.26402	Yes
LPQPDLRYLFLNGNKLAR	0.973704	YLFLNGNKL	0.00168403	7.6119	HLA-DRB1*01:01	0.163687	-2.77365	-2.93734	0.00115522	0.386926	0.26402	Yes
LPQPDLRYLFLNGNKLARVA	0.937505	YLFLNGNKL	0.00400974	7.6119	HLA-DRB1*01:01	0.163687	-2.39688	-2.56057	0.00275062	0.386926	0.26402	Yes
LPSQYITGLAEHLSPL	0.810725	YITGLAEHL	0.00966248	7.6119	HLA-DRB1*01:01	0.163687	-2.01491	-2.1786	0.0066283	0.386926	0.26402	Yes
LPVILDIIKGEMSRPG	0.679036	LDIIKGEMS	0.0149086	7.6119	HLA-DRB1*01:01	0.163687	-1.82656	-1.99025	0.010227	0.386926	0.26402	Yes
LSSYEIITPWRLTR	0.972814	YEIITPWRL	0.00175641	7.6119	HLA-DRB1*01:01	0.163687	-2.75537	-2.91906	0.00120487	0.386926	0.26402	Yes
LVAYYTLIGASGQR	0.833625	YYTLIGASG	0.00875443	7.6119	HLA-DRB1*01:01	0.163687	-2.05777	-2.22146	0.00600539	0.386926	0.26402	Yes
MAQHYLELGAEIART	0.968123	YLELGAEIA	0.0020959	7.6119	HLA-DRB1*01:01	0.163687	-2.67863	-2.84232	0.00143775	0.386926	0.26402	Yes
NEFSILKSPGSVV	0.894866	FSILKSPGS	0.00618025	7.6119	HLA-DRB1*01:01	0.163687	-2.20899	-2.37268	0.00423955	0.386926	0.26402	Yes
NPANPAILSEASAPIPH	0.887787	ILSEASAPI	0.00646826	7.6119	HLA-DRB1*01:01	0.163687	-2.18921	-2.3529	0.00443712	0.386926	0.26402	Yes
NVNIFKFIIPNVVK	0.894129	FKFIIPNVV	0.00620786	7.6119	HLA-DRB1*01:01	0.163687	-2.20706	-2.37074	0.00425849	0.386926	0.26402	Yes
RVEYHFLSPYVSPK	0.968527	YHFLSPYVS	0.00206978	7.6119	HLA-DRB1*01:01	0.163687	-2.68407	-2.84776	0.00141984	0.386926	0.26402	Yes
SGDVFTALIGEIASPN	0.993427	FTALIGEIA	0.000202949	7.6119	HLA-DRB1*01:01	0.163687	-3.69261	-3.8563	0.00013922	0.386926	0.26402	Yes
SGKPQYMVLVPSLLHTET	0.859725	YMVLVPSLL	0.00767999	7.6119	HLA-DRB1*01:01	0.163687	-2.11464	-2.27833	0.00526834	0.386926	0.26402	Yes
SGPYFWSLPSRFLGDK	0.936379	FWSLPSRFL	0.00407839	7.6119	HLA-DRB1*01:01	0.163687	-2.38951	-2.5532	0.0027977	0.386926	0.26402	Yes
SKGLFRAAVPSGAS	0.859329	FRAAVPSGA	0.00769939	7.6119	HLA-DRB1*01:01	0.163687	-2.11354	-2.27723	0.00528165	0.386926	0.26402	Yes
SKNTLYLQMNSLRAEDT	0.915936	YLQMNSLRA	0.00516849	7.6119	HLA-DRB1*01:01	0.163687	-2.28664	-2.45032	0.0035455	0.386926	0.26402	Yes
SPDRIFFHLNAVALGDG	0.983636	FFHLNAVAL	0.000916257	7.6119	HLA-DRB1*01:01	0.163687	-3.03798	-3.20167	0.000628537	0.386926	0.26402	Yes
SPERPFLAILGGAKVADK	0.971519	LAILGGAKV	0.00183923	7.6119	HLA-DRB1*01:01	0.163687	-2.73536	-2.89905	0.00126168	0.386926	0.26402	Yes
SPMYSIITPNILR	0.960077	YSIITPNIL	0.00264729	7.6119	HLA-DRB1*01:01	0.163687	-2.5772	-2.74088	0.001816	0.386926	0.26402	Yes
SPMYSIITPNILRLES	0.943703	YSIITPNIL	0.00367547	7.6119	HLA-DRB1*01:01	0.163687	-2.43469	-2.59837	0.00252131	0.386926	0.26402	Yes
TAADYKILGGSVLHL	0.977747	YKILGGSVL	0.00135872	7.6119	HLA-DRB1*01:01	0.163687	-2.86687	-3.03056	0.000932056	0.386926	0.26402	Yes
TGAQELLRVLRAQPVQVA	0.961769	LRVLRAQPV	0.00254657	7.6119	HLA-DRB1*01:01	0.163687	-2.59404	-2.75773	0.0017469	0.386926	0.26402	Yes
TGDAYVILKTVQLRNG	0.995744	YVILKTVQL	8.1329e-05	7.6119	HLA-DRB1*01:01	0.163687	-4.08975	-4.25344	5.57903e-05	0.386926	0.26402	Yes
TGDAYVILKTVQLRNGNL	0.981734	YVILKTVQL	0.00105355	7.6119	HLA-DRB1*01:01	0.163687	-2.97735	-3.14103	0.000722715	0.386926	0.26402	Yes
TGKFEKLIVALMKPS	0.787085	FEKLIVALM	0.0106056	7.6119	HLA-DRB1*01:01	0.163687	-1.97446	-2.13815	0.00727526	0.386926	0.26402	Yes
TGKLVSLSAQNLVD	0.992617	LVSLSAQNL	0.000253687	7.6119	HLA-DRB1*01:01	0.163687	-3.5957	-3.75939	0.000174025	0.386926	0.26402	Yes
TIEKFEKEAAEMGKG	0.957325	FEKEAAEMG	0.00281518	7.6119	HLA-DRB1*01:01	0.163687	-2.55049	-2.71418	0.00193116	0.386926	0.26402	Yes
TPAMYVAIQAVLS	0.641768	YVAIQAVLS	0.0164262	7.6119	HLA-DRB1*01:01	0.163687	-1.78446	-1.94815	0.0112681	0.386926	0.26402	Yes
TSGDFRKLMVALAKG	0.864496	FRKLMVALA	0.00748823	7.6119	HLA-DRB1*01:01	0.163687	-2.12562	-2.28931	0.0051368	0.386926	0.26402	Yes
TTAYALLTSLNLKD	0.984221	YALLTSLNL	0.000879696	7.6119	HLA-DRB1*01:01	0.163687	-3.05567	-3.21935	0.000603457	0.386926	0.26402	Yes
VALDFEQEMATAASSS	0.955047	FEQEMATAA	0.00296739	7.6119	HLA-DRB1*01:01	0.163687	-2.52763	-2.69131	0.00203558	0.386926	0.26402	Yes
VDMDFEVENAVLGKDFK	0.941671	FEVENAVLG	0.00378515	7.6119	HLA-DRB1*01:01	0.163687	-2.42192	-2.5856	0.00259655	0.386926	0.26402	Yes
VPGKTFVNITPAEVGVL	0.962096	FVNITPAEV	0.00251747	7.6119	HLA-DRB1*01:01	0.163687	-2.59904	-2.76272	0.00172694	0.386926	0.26402	Yes
VSGTLVLLQGARGFA	0.929612	LVLLQGARG	0.00444623	7.6119	HLA-DRB1*01:01	0.163687	-2.35201	-2.51569	0.00305004	0.386926	0.26402	Yes
VVLPSYEEALSLPSKTPEG	0.454212	YEEALSLPS	0.0256112	7.6119	HLA-DRB1*01:01	0.163687	-1.59157	-1.75526	0.0175688	0.386926	0.26402	Yes
VVYYRVQNATLAVAN	0.978348	YRVQNATLA	0.00131992	7.6119	HLA-DRB1*01:01	0.163687	-2.87945	-3.04314	0.000905441	0.386926	0.26402	Yes
SQRHEEKVAAY	3.6e-05	RHEEKVAAY	0.941728	7.6119	HLA-DRB1*01:01	0.163687	-0.0260744	-0.189761	0.64601	0.386926	0.26402	Yes
DPNAPKRPPS	0	PNAPKRPPS	0.993415	7.6119	HLA-DRB1*01:01	0.163687	-0.00286914	-0.166556	0.681466	0.386926	0.26402	Yes
GTGASGSFKLNKKAA	0.000156	TGASGSFKL	0.831173	7.6119	HLA-DRB1*01:01	0.163687	-0.0803086	-0.243995	0.570171	0.386926	0.26402	Yes
HDLDFTPEPAARASF	0.960666	FTPEPAARA	0.00261596	7.6119	HLA-DRB1*01:01	0.163687	-2.58237	-2.74606	0.0017945	0.386926	0.26402	Yes
KKKARKSAGAAKRKA	0.003746	RKSAGAAKR	0.341852	7.6119	HLA-DRB1*01:01	0.163687	-0.466162	-0.629849	0.234505	0.386926	0.26402	Yes
KVKTPQPKKAAKSPA	0.001094	PQPKKAAKS	0.526877	7.6119	HLA-DRB1*01:01	0.163687	-0.278291	-0.441978	0.361428	0.386926	0.26402	Yes
SKGTLVQTKGTGASG	0.613766	LVQTKGTGA	0.0176312	7.6119	HLA-DRB1*01:01	0.163687	-1.75372	-1.9174	0.0120947	0.386926	0.26402	Yes
TELGRPDAEYW	1.7e-05	LGRPDAEYW	0.963054	7.6119	HLA-DRB1*01:01	0.163687	-0.0163492	-0.180036	0.660639	0.386926	0.26402	Yes
AINSSLPYQNIHPVTIGECPK	0.106078	YQNIHPVTI	0.0735206	7.6119	HLA-DRB1*01:01	0.163687	-1.13359	-1.29728	0.0504339	0.386926	0.26402	Yes
FAALNAQHVLA	0.111705	FAALNAQHV	0.0714837	7.6119	HLA-DRB1*01:01	0.163687	-1.14579	-1.30948	0.0490366	0.386926	0.26402	Yes
GACPKYVKQNTLKLATGMRK	0.211939	YVKQNTLKL	0.047999	7.6119	HLA-DRB1*01:01	0.163687	-1.31877	-1.48245	0.0329265	0.386926	0.26402	Yes
SRGACPKYVKQNTLKLATGMRK	0.168361	YVKQNTLKL	0.0558931	7.6119	HLA-DRB1*01:01	0.163687	-1.25264	-1.41633	0.0383418	0.386926	0.26402	Yes
RVAPEEHPVL	2.3e-05	VAPEEHPVL	0.956426	7.6119	HLA-DRB1*01:01	0.163687	-0.0193485	-0.183035	0.656092	0.386926	0.26402	Yes
ILEKKVEKV	1e-06	ILEKKVEKV	0.986479	7.6119	HLA-DRB1*01:01	0.163687	-0.00591205	-0.169599	0.676708	0.386926	0.26402	Yes
LVVRHQLLKT	7e-06	VVRHQLLKT	0.97511	7.6119	HLA-DRB1*01:01	0.163687	-0.0109462	-0.174633	0.668909	0.386926	0.26402	Yes
EEFGRFASF	0	EEFGRFASF	0.993408	7.6119	HLA-DRB1*01:01	0.163687	-0.0028724	-0.166559	0.681461	0.386926	0.26402	Yes
KASGPPVSEL	2e-06	ASGPPVSEL	0.984988	7.6119	HLA-DRB1*01:01	0.163687	-0.00656886	-0.170255	0.675686	0.386926	0.26402	Yes
KRFSGTVRL	1e-06	KRFSGTVRL	0.986552	7.6119	HLA-DRB1*01:01	0.163687	-0.00587986	-0.169566	0.676758	0.386926	0.26402	Yes
QEMEGTVKSKY	2.6e-05	QEMEGTVKS	0.953107	7.6119	HLA-DRB1*01:01	0.163687	-0.0208584	-0.184545	0.653815	0.386926	0.26402	Yes
SEGTKAVTKY	2e-06	SEGTKAVTK	0.984981	7.6119	HLA-DRB1*01:01	0.163687	-0.00657215	-0.170259	0.67568	0.386926	0.26402	Yes
YVTTSTRTY	5e-06	YVTTSTRTY	0.979068	7.6119	HLA-DRB1*01:01	0.163687	-0.0091872	-0.172874	0.671624	0.386926	0.26402	Yes
KEITALAPSTM	0.056624	ITALAPSTM	0.103129	7.6119	HLA-DRB1*01:01	0.163687	-0.98662	-1.15031	0.0707447	0.386926	0.26402	Yes
KRQGRTLYGF	1e-06	RQGRTLYGF	0.986608	7.6119	HLA-DRB1*01:01	0.163687	-0.00585555	-0.169542	0.676796	0.386926	0.26402	Yes
LRVAPEEHPVL	0.000102	VAPEEHPVL	0.875657	7.6119	HLA-DRB1*01:01	0.163687	-0.057666	-0.221353	0.600686	0.386926	0.26402	Yes
ARLQTALLV	4e-06	ARLQTALLV	0.980927	7.6119	HLA-DRB1*01:01	0.163687	-0.00836321	-0.17205	0.6729	0.386926	0.26402	Yes
GRVFIIKSY	0	GRVFIIKSY	0.993235	7.6119	HLA-DRB1*01:01	0.163687	-0.00294808	-0.166635	0.681342	0.386926	0.26402	Yes
TNMKHMAGAAAAG	0.849487	MKHMAGAAA	0.00811051	7.6119	HLA-DRB1*01:01	0.163687	-2.09095	-2.25464	0.00556367	0.386926	0.26402	Yes
LLIENVASL	1e-06	LLIENVASL	0.986652	7.6119	HLA-DRB1*01:01	0.163687	-0.00583617	-0.169523	0.676826	0.386926	0.26402	Yes
QVHPDTGISSK	0.000259	VHPDTGISS	0.763507	7.6119	HLA-DRB1*01:01	0.163687	-0.117187	-0.280873	0.523753	0.386926	0.26402	Yes
SLVSKGTLVQTK	0.000695	LVSKGTLVQ	0.603664	7.6119	HLA-DRB1*01:01	0.163687	-0.219205	-0.382891	0.414103	0.386926	0.26402	Yes
VLKQVHPDTGISSK	0.007048	VHPDTGISS	0.2664	7.6119	HLA-DRB1*01:01	0.163687	-0.574466	-0.738152	0.182746	0.386926	0.26402	Yes
GSDWRFLRGYHQYA	0.775278	WRFLRGYHQ	0.0110839	7.6119	HLA-DRB1*01:01	0.163687	-1.95531	-2.119	0.00760335	0.386926	0.26402	Yes
AEQVPELEAVLHLVIASSDTRHS	0.00103	LHLVIASSD	0.536888	7.6119	HLA-DRB1*01:01	0.163687	-0.270116	-0.433803	0.368296	0.386926	0.26402	Yes
AEVPVSEASGQAPPAKAAKQDIEDTASDAKRK	0.001942	EASGQAPPA	0.434745	7.6119	HLA-DRB1*01:01	0.163687	-0.361765	-0.525452	0.298228	0.386926	0.26402	Yes
AGDAVSVATLAEIYVAAALRVK	0.006396	IYVAAALRV	0.277231	7.6119	HLA-DRB1*01:01	0.163687	-0.557158	-0.720845	0.190176	0.386926	0.26402	Yes
APEPSTVQILHSPAVEGSQ	0.860791	VQILHSPAV	0.00762851	7.6119	HLA-DRB1*01:01	0.163687	-2.11756	-2.28125	0.00523303	0.386926	0.26402	Yes
APPVRHLIATQLLSNL	0.888302	VRHLIATQL	0.0064429	7.6119	HLA-DRB1*01:01	0.163687	-2.19092	-2.35461	0.00441972	0.386926	0.26402	Yes
AQLLWTQLTPMGGRPG	0.544102	WTQLTPMGG	0.0208672	7.6119	HLA-DRB1*01:01	0.163687	-1.68054	-1.84422	0.0143146	0.386926	0.26402	Yes
ASHFEQMAAASMHRVG	0.934788	FEQMAAASM	0.00415748	7.6119	HLA-DRB1*01:01	0.163687	-2.38117	-2.54486	0.00285196	0.386926	0.26402	Yes
AVGSAVGHVMGSALTGAF	0.01923	VGHVMGSAL	0.173095	7.6119	HLA-DRB1*01:01	0.163687	-0.761716	-0.925402	0.11874	0.386926	0.26402	Yes
AWAKLQASLTPGSSNTGSDLEA	0.004753	WAKLQASLT	0.311811	7.6119	HLA-DRB1*01:01	0.163687	-0.506109	-0.669795	0.213897	0.386926	0.26402	Yes
AYQANILVEDATIGIVDNELLTS	0.023306	ILVEDATIG	0.158704	7.6119	HLA-DRB1*01:01	0.163687	-0.799412	-0.963098	0.108868	0.386926	0.26402	Yes
DDDWTHLSSKEVDPSTG	0.96499	WTHLSSKEV	0.00232198	7.6119	HLA-DRB1*01:01	0.163687	-2.63414	-2.79783	0.00159284	0.386926	0.26402	Yes
DEHTPSPIAGRQPLEVQ	0.001762	IAGRQPLEV	0.449524	7.6119	HLA-DRB1*01:01	0.163687	-0.347247	-0.510934	0.308366	0.386926	0.26402	Yes
DKGWSFLLGKYISIG	0.905612	WSFLLGKYI	0.00568034	7.6119	HLA-DRB1*01:01	0.163687	-2.24563	-2.40931	0.00389662	0.386926	0.26402	Yes
DLKGEFIWVDGSHVDYSN	0.88117	FIWVDGSHV	0.00677343	7.6119	HLA-DRB1*01:01	0.163687	-2.16919	-2.33288	0.00464646	0.386926	0.26402	Yes
DLNPLIKLSGAYLVDDSDPD	0.623329	LIKLSGAYL	0.0172	7.6119	HLA-DRB1*01:01	0.163687	-1.76447	-1.92816	0.0117989	0.386926	0.26402	Yes
DLNPLIKLSGAYLVDDSDPDT	0.434629	LIKLSGAYL	0.0268184	7.6119	HLA-DRB1*01:01	0.163687	-1.57157	-1.73525	0.018397	0.386926	0.26402	Yes
DTGSYRAQISTKTSAKL	0.965043	YRAQISTKT	0.00231601	7.6119	HLA-DRB1*01:01	0.163687	-2.63526	-2.79895	0.00158874	0.386926	0.26402	Yes
DVGSDWRFLRGYHQYAYD	0.501827	WRFLRGYHQ	0.0230079	7.6119	HLA-DRB1*01:01	0.163687	-1.63812	-1.80181	0.015783	0.386926	0.26402	Yes
DVGSDWRFLRGYHQYAYDGK	0.234706	WRFLRGYHQ	0.0446959	7.6119	HLA-DRB1*01:01	0.163687	-1.34973	-1.51342	0.0306606	0.386926	0.26402	Yes
EALHGPPKKILVEGANAALLDI	0.411823	ILVEGANAA	0.0282577	7.6119	HLA-DRB1*01:01	0.163687	-1.54886	-1.71255	0.0193843	0.386926	0.26402	Yes
EDPAFYMLKGKLQYE	0.913522	FYMLKGKLQ	0.00527967	7.6119	HLA-DRB1*01:01	0.163687	-2.27739	-2.44108	0.00362176	0.386926	0.26402	Yes
EFGRFASFEAQGALA	0.855018	FASFEAQGA	0.00789189	7.6119	HLA-DRB1*01:01	0.163687	-2.10282	-2.26651	0.00541371	0.386926	0.26402	Yes
EFGRFASFEAQGALAN	0.885691	FASFEAQGA	0.00656974	7.6119	HLA-DRB1*01:01	0.163687	-2.18245	-2.34614	0.00450673	0.386926	0.26402	Yes
EFGRFASFEAQGALANIA	0.801164	FASFEAQGA	0.0100527	7.6119	HLA-DRB1*01:01	0.163687	-1.99772	-2.1614	0.00689599	0.386926	0.26402	Yes
EGVNDNEEGFFSAR	0.000314	NDNEEGFFS	0.734973	7.6119	HLA-DRB1*01:01	0.163687	-0.133729	-0.297415	0.504179	0.386926	0.26402	Yes
ENSPNVFGFLAAWNLLLPPAGH	0.061999	FGFLAAWNL	0.0982648	7.6119	HLA-DRB1*01:01	0.163687	-1.0076	-1.17129	0.067408	0.386926	0.26402	Yes
ERDALNIETAIKTKGVDE	0.874567	LNIETAIKT	0.007051	7.6119	HLA-DRB1*01:01	0.163687	-2.15175	-2.31544	0.00483687	0.386926	0.26402	Yes
ETPFFLLTGYALDAR	0.983444	FFLLTGYAL	0.000930433	7.6119	HLA-DRB1*01:01	0.163687	-3.03131	-3.195	0.000638261	0.386926	0.26402	Yes
FAYYHGLLGNRLWSSL	0.883297	YHGLLGNRL	0.00667047	7.6119	HLA-DRB1*01:01	0.163687	-2.17584	-2.33953	0.00457583	0.386926	0.26402	Yes
FEPFFMMIATPAPHSP	0.968898	FFMMIATPA	0.00204143	7.6119	HLA-DRB1*01:01	0.163687	-2.69007	-2.85375	0.00140039	0.386926	0.26402	Yes
FEPFFMMIATPAPHSPW	0.937462	FFMMIATPA	0.00401198	7.6119	HLA-DRB1*01:01	0.163687	-2.39664	-2.56033	0.00275215	0.386926	0.26402	Yes
FGRFASFEAQGALAN	0.905029	FASFEAQGA	0.00570944	7.6119	HLA-DRB1*01:01	0.163687	-2.24341	-2.40709	0.00391658	0.386926	0.26402	Yes
FLVEEYSTSGRLDNITQV	0.000614	YSTSGRLDN	0.624489	7.6119	HLA-DRB1*01:01	0.163687	-0.204475	-0.368162	0.428389	0.386926	0.26402	Yes
FPLPIDMLQGIIGAKH	0.910846	IDMLQGIIG	0.00541472	7.6119	HLA-DRB1*01:01	0.163687	-2.26642	-2.43011	0.00371441	0.386926	0.26402	Yes
FPLPIDMLQGIIGAKHS	0.856139	IDMLQGIIG	0.00784116	7.6119	HLA-DRB1*01:01	0.163687	-2.10562	-2.26931	0.0053789	0.386926	0.26402	Yes
GASILATAANLLRHYPT	0.704581	ILATAANLL	0.0138588	7.6119	HLA-DRB1*01:01	0.163687	-1.85828	-2.02196	0.00950687	0.386926	0.26402	Yes
GDDDWTHLSSKEVDPSTG	0.950928	WTHLSSKEV	0.00322704	7.6119	HLA-DRB1*01:01	0.163687	-2.4912	-2.65488	0.0022137	0.386926	0.26402	Yes
GLLWIALHGNQITSDK	0.98833	WIALHGNQI	0.000552142	7.6119	HLA-DRB1*01:01	0.163687	-3.25795	-3.42164	0.00037876	0.386926	0.26402	Yes
HPNQPFYILKPQMPWE	0.7562	FYILKPQMP	0.0118487	7.6119	HLA-DRB1*01:01	0.163687	-1.92633	-2.09002	0.00812798	0.386926	0.26402	Yes
HTGSWIGLRNLDLKGEFI	0.797966	WIGLRNLDL	0.0101736	7.6119	HLA-DRB1*01:01	0.163687	-1.99253	-2.15621	0.00697891	0.386926	0.26402	Yes
IDDMIYFSSDAVTSRV	0.395819	YFSSDAVTS	0.0293023	7.6119	HLA-DRB1*01:01	0.163687	-1.5331	-1.69678	0.0201009	0.386926	0.26402	Yes
IDKKISRLDAELVKYKDQ	0.970677	ISRLDAELV	0.0019116	7.6119	HLA-DRB1*01:01	0.163687	-2.7186	-2.88229	0.00131133	0.386926	0.26402	Yes
IEKFEKEAAEMGKG	0.945279	FEKEAAEMG	0.00357251	7.6119	HLA-DRB1*01:01	0.163687	-2.44703	-2.61071	0.00245068	0.386926	0.26402	Yes
IEKFEKEAAEMGKGSF	0.948003	FEKEAAEMG	0.00340089	7.6119	HLA-DRB1*01:01	0.163687	-2.46841	-2.63209	0.00233296	0.386926	0.26402	Yes
IIGPPGMQVEVLADSLHMRF	0.000535	MQVEVLADS	0.648019	7.6119	HLA-DRB1*01:01	0.163687	-0.188412	-0.352098	0.44453	0.386926	0.26402	Yes
IPVQTISRAAAEKLFG	0.779572	ISRAAAEKL	0.0109003	7.6119	HLA-DRB1*01:01	0.163687	-1.96256	-2.12625	0.00747744	0.386926	0.26402	Yes
IPVQTISRAAAEKLFGN	0.856012	ISRAAAEKL	0.00784638	7.6119	HLA-DRB1*01:01	0.163687	-2.10533	-2.26902	0.00538248	0.386926	0.26402	Yes
IPVQTISRAAAEKLFGNM	0.788817	ISRAAAEKL	0.0105489	7.6119	HLA-DRB1*01:01	0.163687	-1.97679	-2.14048	0.00723636	0.386926	0.26402	Yes
IPVQTISRAAAEKLFGNME	0.67288	ISRAAAEKL	0.0151526	7.6119	HLA-DRB1*01:01	0.163687	-1.81951	-1.9832	0.0103944	0.386926	0.26402	Yes
IRDIFGFIGASAASM	0.62145	FGFIGASAA	0.0172835	7.6119	HLA-DRB1*01:01	0.163687	-1.76237	-1.92605	0.0118562	0.386926	0.26402	Yes
ISNIYLIKGSALRGEL	0.90239	IYLIKGSAL	0.00584822	7.6119	HLA-DRB1*01:01	0.163687	-2.23298	-2.39666	0.00401178	0.386926	0.26402	Yes
KANEKERQAALQVAEGFISRMQ	0.011185	LQVAEGFIS	0.219631	7.6119	HLA-DRB1*01:01	0.163687	-0.658307	-0.821993	0.150663	0.386926	0.26402	Yes
KETLKHLASLYANNHPS	0.865059	LKHLASLYA	0.00746212	7.6119	HLA-DRB1*01:01	0.163687	-2.12714	-2.29082	0.00511889	0.386926	0.26402	Yes
KGEFIWVDGSHVDYS	0.966987	FIWVDGSHV	0.00218021	7.6119	HLA-DRB1*01:01	0.163687	-2.6615	-2.82519	0.00149559	0.386926	0.26402	Yes
KGRLDYLSSLKVKG	0.969249	LDYLSSLKV	0.00201905	7.6119	HLA-DRB1*01:01	0.163687	-2.69485	-2.85854	0.00138503	0.386926	0.26402	Yes
KNLDFSVIVANKAAFHK	0.97301	FSVIVANKA	0.00173552	7.6119	HLA-DRB1*01:01	0.163687	-2.76057	-2.92426	0.00119053	0.386926	0.26402	Yes
KPPKPVSKMRMATPLLMQ	0.411646	MRMATPLLM	0.0282704	7.6119	HLA-DRB1*01:01	0.163687	-1.54867	-1.71235	0.019393	0.386926	0.26402	Yes
KPPKPVSKMRMATPLLMQAL	0.511269	MRMATPLLM	0.0225095	7.6119	HLA-DRB1*01:01	0.163687	-1.64763	-1.81132	0.0154411	0.386926	0.26402	Yes
KRVLIAAHGNSLRG	0.970112	LIAAHGNSL	0.00194742	7.6119	HLA-DRB1*01:01	0.163687	-2.71054	-2.87423	0.0013359	0.386926	0.26402	Yes
KSNLYCLKPTICSDQDN	0.649713	LYCLKPTIC	0.0161128	7.6119	HLA-DRB1*01:01	0.163687	-1.79283	-1.95651	0.0110531	0.386926	0.26402	Yes
KTFIFSEKPVFVYGLL	0.508148	IFSEKPVFV	0.0226617	7.6119	HLA-DRB1*01:01	0.163687	-1.64471	-1.80839	0.0155455	0.386926	0.26402	Yes
KTTIRLMNSQLVTTE	0.981833	IRLMNSQLV	0.00104832	7.6119	HLA-DRB1*01:01	0.163687	-2.9795	-3.14319	0.000719132	0.386926	0.26402	Yes
KTTIRLMNSQLVTTEK	0.974461	IRLMNSQLV	0.00161688	7.6119	HLA-DRB1*01:01	0.163687	-2.79132	-2.95501	0.00110915	0.386926	0.26402	Yes
KVPVFYALFTPQLNNVG	0.688402	FYALFTPQL	0.014481	7.6119	HLA-DRB1*01:01	0.163687	-1.8392	-2.00289	0.00993374	0.386926	0.26402	Yes
LAPPVRHLIATQLLSNL	0.863209	VRHLIATQL	0.00754121	7.6119	HLA-DRB1*01:01	0.163687	-2.12256	-2.28625	0.00517314	0.386926	0.26402	Yes
LDKLIRLVNAQQAKGSS	0.944331	IRLVNAQQA	0.00363294	7.6119	HLA-DRB1*01:01	0.163687	-2.43974	-2.60343	0.00249214	0.386926	0.26402	Yes
LENGGMGISHSNSFPPIR	0.001616	MGISHSNSF	0.463103	7.6119	HLA-DRB1*01:01	0.163687	-0.334323	-0.498009	0.317681	0.386926	0.26402	Yes
LKGRLDYLSSLKVKGLV	0.897573	LDYLSSLKV	0.00606833	7.6119	HLA-DRB1*01:01	0.163687	-2.21693	-2.38062	0.00416278	0.386926	0.26402	Yes
LLQVPAEASDEGIVISANEDEPG	0.001163	IVISANEDE	0.516699	7.6119	HLA-DRB1*01:01	0.163687	-0.286763	-0.450449	0.354447	0.386926	0.26402	Yes
LLYRLRFLSASAV	0.165275	LRFLSASAV	0.0565445	7.6119	HLA-DRB1*01:01	0.163687	-1.24761	-1.4113	0.0387886	0.386926	0.26402	Yes
LPKPPKPVSKMRMA	0.000123	PKPVSKMRM	0.857531	7.6119	HLA-DRB1*01:01	0.163687	-0.0667501	-0.230437	0.588252	0.386926	0.26402	Yes
LPKPPKPVSKMRMATPLLMQAL	0.459457	MRMATPLLM	0.025303	7.6119	HLA-DRB1*01:01	0.163687	-1.59683	-1.76051	0.0173574	0.386926	0.26402	Yes
LPNIPVQTISRAAAEKLFGNME	0.467327	ISRAAAEKL	0.0248613	7.6119	HLA-DRB1*01:01	0.163687	-1.60448	-1.76816	0.0170544	0.386926	0.26402	Yes
LPPQATFQVLRGNGASVGT	0.983851	FQVLRGNGA	0.000900588	7.6119	HLA-DRB1*01:01	0.163687	-3.04547	-3.20916	0.000617788	0.386926	0.26402	Yes
LPSVEGLHAIVVSDRD	0.873083	VEGLHAIVV	0.00711367	7.6119	HLA-DRB1*01:01	0.163687	-2.14791	-2.31159	0.00487986	0.386926	0.26402	Yes
LREEEDRGIVRNKVL	0.000198	DRGIVRNKV	0.801233	7.6119	HLA-DRB1*01:01	0.163687	-0.0962413	-0.259928	0.549632	0.386926	0.26402	Yes
MDNEIKVAKAEAAGHR	0.981158	IKVAKAEAA	0.00110428	7.6119	HLA-DRB1*01:01	0.163687	-2.95692	-3.12061	0.00075752	0.386926	0.26402	Yes
MEGKVQVPIFKGQV	0.000579	KVQVPIFKG	0.634737	7.6119	HLA-DRB1*01:01	0.163687	-0.197406	-0.361093	0.435419	0.386926	0.26402	Yes
MPPKNLVELFGKLASGRY	0.848911	LVELFGKLA	0.00813812	7.6119	HLA-DRB1*01:01	0.163687	-2.08948	-2.25316	0.00558261	0.386926	0.26402	Yes
MPPKNLVELFGKLASGRYL	0.753901	LVELFGKLA	0.0119345	7.6119	HLA-DRB1*01:01	0.163687	-1.9232	-2.08688	0.00818684	0.386926	0.26402	Yes
MTMGDMKTPDFDDLLAA	0.000151	KTPDFDDLL	0.835383	7.6119	HLA-DRB1*01:01	0.163687	-0.0781141	-0.241801	0.573059	0.386926	0.26402	Yes
MTYTAFSDVVMQ	0.017651	YTAFSDVVM	0.1798	7.6119	HLA-DRB1*01:01	0.163687	-0.745211	-0.908898	0.12334	0.386926	0.26402	Yes
NLEKKARLKEEAAMKAKTE	0.490428	LKEEAAMKA	0.0235794	7.6119	HLA-DRB1*01:01	0.163687	-1.62747	-1.79115	0.0161751	0.386926	0.26402	Yes
NVNIFKFIIPNVVKYSPN	0.78323	FKFIIPNVV	0.0107503	7.6119	HLA-DRB1*01:01	0.163687	-1.96858	-2.13226	0.00737456	0.386926	0.26402	Yes
NVNVFKFIIPQIVK	0.855225	FKFIIPQIV	0.0078807	7.6119	HLA-DRB1*01:01	0.163687	-2.10344	-2.26712	0.00540603	0.386926	0.26402	Yes
PCDHTMVKLQPGDMAAITTKVLRVNGEKIL	0.061983	MAAITTKVL	0.0982782	7.6119	HLA-DRB1*01:01	0.163687	-1.00754	-1.17123	0.0674172	0.386926	0.26402	Yes
PKGKKAKGKKVAPAPAVVKKQ	0.007994	VAPAPAVVK	0.252729	7.6119	HLA-DRB1*01:01	0.163687	-0.597346	-0.761032	0.173368	0.386926	0.26402	Yes
PRSATATLHVLLVDGFSQPFLPLP	0.000195	LHVLLVDGF	0.8035	7.6119	HLA-DRB1*01:01	0.163687	-0.095014	-0.258701	0.551188	0.386926	0.26402	Yes
PTLRSGIVMEVPPGNTRIACRGK	0.043897	IVMEVPPGN	0.117371	7.6119	HLA-DRB1*01:01	0.163687	-0.930439	-1.09413	0.0805146	0.386926	0.26402	Yes
QVQLQQWGAGLLEPSETLPLT	0.001001	LQQWGAGLL	0.541717	7.6119	HLA-DRB1*01:01	0.163687	-0.266228	-0.429914	0.371608	0.386926	0.26402	Yes
QYQEHQQATELLRQAHMPQM	0.000588	QEHQQATEL	0.632154	7.6119	HLA-DRB1*01:01	0.163687	-0.199177	-0.362863	0.433647	0.386926	0.26402	Yes
RGVREGGAAMAAGESMA	0.009212	VREGGAAMA	0.238219	7.6119	HLA-DRB1*01:01	0.163687	-0.623023	-0.78671	0.163414	0.386926	0.26402	Yes
RKKQIEELKGQEVSPKVY	0.981489	IEELKGQEV	0.00107668	7.6119	HLA-DRB1*01:01	0.163687	-2.96791	-3.1316	0.000738582	0.386926	0.26402	Yes
RLSLAAAAGDPFAYPGAGGLYK	0.0022	FAYPGAGGL	0.416066	7.6119	HLA-DRB1*01:01	0.163687	-0.380837	-0.544524	0.285414	0.386926	0.26402	Yes
RPAGDRTFQKWAAVVVPSGEE	0.507601	FQKWAAVVV	0.0226885	7.6119	HLA-DRB1*01:01	0.163687	-1.64419	-1.80788	0.015564	0.386926	0.26402	Yes
RPPGQGEFRALNARLPLNTD	0.485136	FRALNARLP	0.0238921	7.6119	HLA-DRB1*01:01	0.163687	-1.62175	-1.78543	0.0163896	0.386926	0.26402	Yes
RSTYNHLSSWLTDAR	0.972093	YNHLSSWLT	0.00180416	7.6119	HLA-DRB1*01:01	0.163687	-2.74372	-2.90741	0.00123762	0.386926	0.26402	Yes
RVEYHFLSPYVSPKE	0.974678	YHFLSPYVS	0.00159972	7.6119	HLA-DRB1*01:01	0.163687	-2.79596	-2.95964	0.00109738	0.386926	0.26402	Yes
RVEYHFLSPYVSPKES	0.967593	YHFLSPYVS	0.00213097	7.6119	HLA-DRB1*01:01	0.163687	-2.67142	-2.83511	0.00146181	0.386926	0.26402	Yes
RVEYHFLSPYVSPKESPF	0.907611	YHFLSPYVS	0.00558782	7.6119	HLA-DRB1*01:01	0.163687	-2.25276	-2.41644	0.00383315	0.386926	0.26402	Yes
RVEYHFLSPYVSPKESPFR	0.823916	YHFLSPYVS	0.00915585	7.6119	HLA-DRB1*01:01	0.163687	-2.0383	-2.20199	0.00628076	0.386926	0.26402	Yes
SIKLGSSKPKETVPTLA	0.001175	LGSSKPKET	0.514892	7.6119	HLA-DRB1*01:01	0.163687	-0.288284	-0.45197	0.353207	0.386926	0.26402	Yes
SLIPRLVEFF	3e-06	LIPRLVEFF	0.982232	7.6119	HLA-DRB1*01:01	0.163687	-0.00778582	-0.171472	0.673795	0.386926	0.26402	Yes
SLPAESYGNDPDIEMAWAM	0.001205	YGNDPDIEM	0.510679	7.6119	HLA-DRB1*01:01	0.163687	-0.291852	-0.455539	0.350317	0.386926	0.26402	Yes
SLRPAPPPISGGGYRARPA	0.000923	PISGGGYRA	0.555418	7.6119	HLA-DRB1*01:01	0.163687	-0.25538	-0.419067	0.381007	0.386926	0.26402	Yes
SNRVVDLMAHMASKE	0.931357	VVDLMAHMA	0.00434923	7.6119	HLA-DRB1*01:01	0.163687	-2.36159	-2.52527	0.0029835	0.386926	0.26402	Yes
SPARAAALRTVNTVESLARAVPGALPGAAGTAGAAE	0.07509	LARAVPGAL	0.0888978	7.6119	HLA-DRB1*01:01	0.163687	-1.05111	-1.2148	0.0609824	0.386926	0.26402	Yes
SPEDEYELLMPHRIS	0.969568	YELLMPHRI	0.00198995	7.6119	HLA-DRB1*01:01	0.163687	-2.70116	-2.86484	0.00136507	0.386926	0.26402	Yes
SPEDEYELLMPHRISS	0.983844	YELLMPHRI	0.000902826	7.6119	HLA-DRB1*01:01	0.163687	-3.0444	-3.20808	0.000619323	0.386926	0.26402	Yes
SPEDEYELLMPHRISSH	0.987224	YELLMPHRI	0.000638693	7.6119	HLA-DRB1*01:01	0.163687	-3.19471	-3.35839	0.000438133	0.386926	0.26402	Yes
SPEDEYELLMPHRISSHF	0.980617	YELLMPHRI	0.00114532	7.6119	HLA-DRB1*01:01	0.163687	-2.94107	-3.10476	0.000785671	0.386926	0.26402	Yes
SPERPFLAILGGAKVADKI	0.94909	LAILGGAKV	0.0033315	7.6119	HLA-DRB1*01:01	0.163687	-2.47736	-2.64105	0.00228535	0.386926	0.26402	Yes
SPERPFLAILGGAKVADKIQ	0.909937	LAILGGAKV	0.00546172	7.6119	HLA-DRB1*01:01	0.163687	-2.26267	-2.42636	0.00374665	0.386926	0.26402	Yes
SPIEKWNLIIGNLALK	0.760267	WNLIIGNLA	0.0116912	7.6119	HLA-DRB1*01:01	0.163687	-1.93214	-2.09583	0.00801998	0.386926	0.26402	Yes
SPLAFEHVMTRGVRPP	0.621483	FEHVMTRGV	0.017282	7.6119	HLA-DRB1*01:01	0.163687	-1.76241	-1.92609	0.0118552	0.386926	0.26402	Yes
SRETYNSLAAWLTDART	0.978149	YNSLAAWLT	0.00133335	7.6119	HLA-DRB1*01:01	0.163687	-2.87506	-3.03874	0.000914654	0.386926	0.26402	Yes
SRLIRQVERL	2e-06	RLIRQVERL	0.98615	7.6119	HLA-DRB1*01:01	0.163687	-0.00605693	-0.169743	0.676482	0.386926	0.26402	Yes
SVLLFIEHSVEVAHGK	0.437457	LFIEHSVEV	0.0266274	7.6119	HLA-DRB1*01:01	0.163687	-1.57467	-1.73836	0.0182659	0.386926	0.26402	Yes
SVPKELVALMSAIRDGETP	0.119783	LVALMSAIR	0.0687103	7.6119	HLA-DRB1*01:01	0.163687	-1.16298	-1.32666	0.0471341	0.386926	0.26402	Yes
SWEERDRMIQVYFPKEGR	0.000778	DRMIQVYFP	0.584469	7.6119	HLA-DRB1*01:01	0.163687	-0.233239	-0.396925	0.400936	0.386926	0.26402	Yes
TGKFVIFGATSLQNTG	0.839199	FVIFGATSL	0.00852611	7.6119	HLA-DRB1*01:01	0.163687	-2.06925	-2.23294	0.00584877	0.386926	0.26402	Yes
TGSWIGLRNLDLK	0.858418	WIGLRNLDL	0.00773446	7.6119	HLA-DRB1*01:01	0.163687	-2.11157	-2.27526	0.00530571	0.386926	0.26402	Yes
TGSWIGLRNLDLKGE	0.951629	WIGLRNLDL	0.00318451	7.6119	HLA-DRB1*01:01	0.163687	-2.49696	-2.66064	0.00218452	0.386926	0.26402	Yes
TGSWIGLRNLDLKGEF	0.911706	WIGLRNLDL	0.0053692	7.6119	HLA-DRB1*01:01	0.163687	-2.27009	-2.43378	0.00368318	0.386926	0.26402	Yes
TGSWIGLRNLDLKGEFI	0.840836	WIGLRNLDL	0.00846642	7.6119	HLA-DRB1*01:01	0.163687	-2.0723	-2.23599	0.00580782	0.386926	0.26402	Yes
TLAETGLMSLGILLLLVSRLLFVV	0.000546	LLLLVSRLL	0.644674	7.6119	HLA-DRB1*01:01	0.163687	-0.19066	-0.354347	0.442235	0.386926	0.26402	Yes
TPDPSKFFSQLSSEHGGDV	0.783883	FSQLSSEHG	0.0107265	7.6119	HLA-DRB1*01:01	0.163687	-1.96954	-2.13323	0.00735818	0.386926	0.26402	Yes
TPDPSKFFSQLSSEHGGDVQ	0.678001	FSQLSSEHG	0.0149496	7.6119	HLA-DRB1*01:01	0.163687	-1.82537	-1.98906	0.0102552	0.386926	0.26402	Yes
TSANTDYMELRGLTSED	0.681318	YMELRGLTS	0.0147944	7.6119	HLA-DRB1*01:01	0.163687	-1.8299	-1.99359	0.0101487	0.386926	0.26402	Yes
TYMAASGVTPDVNTNGF	0.006586	YMAASGVTP	0.273929	7.6119	HLA-DRB1*01:01	0.163687	-0.562361	-0.726048	0.187911	0.386926	0.26402	Yes
VATPIAMVQAAMTLLSDASHLPKAGGVF	0.004637	IAMVQAAMT	0.314802	7.6119	HLA-DRB1*01:01	0.163687	-0.501962	-0.665649	0.215949	0.386926	0.26402	Yes
VDKVIQAQTAFSANPA	0.977598	IQAQTAFSA	0.00137588	7.6119	HLA-DRB1*01:01	0.163687	-2.86142	-3.02511	0.000943829	0.386926	0.26402	Yes
VDKVIQAQTAFSANPAN	0.969653	IQAQTAFSA	0.00198547	7.6119	HLA-DRB1*01:01	0.163687	-2.70214	-2.86582	0.001362	0.386926	0.26402	Yes
VDKVIQAQTAFSANPANP	0.947953	IQAQTAFSA	0.00340313	7.6119	HLA-DRB1*01:01	0.163687	-2.46812	-2.63181	0.00233449	0.386926	0.26402	Yes
VDKVIQAQTAFSANPANPA	0.908644	IQAQTAFSA	0.00553485	7.6119	HLA-DRB1*01:01	0.163687	-2.25689	-2.42058	0.00379681	0.386926	0.26402	Yes
VGQLQSPTLNSPIYMQKQ	0.001043	PTLNSPIYM	0.534953	7.6119	HLA-DRB1*01:01	0.163687	-0.271685	-0.435371	0.366969	0.386926	0.26402	Yes
VGSDWRFLRGYHQYAYDGKDY	0.108475	WRFLRGYHQ	0.0726193	7.6119	HLA-DRB1*01:01	0.163687	-1.13895	-1.30263	0.0498156	0.386926	0.26402	Yes
VQIPLLLGQLVKVVAK	0.007369	LLLGQLVKV	0.261529	7.6119	HLA-DRB1*01:01	0.163687	-0.58248	-0.746166	0.179405	0.386926	0.26402	Yes
VSARSVKLLDRIHNPDE	0.006033	VKLLDRIHN	0.283799	7.6119	HLA-DRB1*01:01	0.163687	-0.546989	-0.710675	0.194682	0.386926	0.26402	Yes
VSIPATSTAKPQSTT	0.000553	TSTAKPQST	0.642273	7.6119	HLA-DRB1*01:01	0.163687	-0.192281	-0.355967	0.440588	0.386926	0.26402	Yes
VVYYRVQNATLAVANIT	0.923966	YRVQNATLA	0.00476707	7.6119	HLA-DRB1*01:01	0.163687	-2.32175	-2.48543	0.00327013	0.386926	0.26402	Yes
WFRVSSQRRSQAEPVARMLEGVRR	0.001773	QRRSQAEPV	0.448675	7.6119	HLA-DRB1*01:01	0.163687	-0.348068	-0.511754	0.307784	0.386926	0.26402	Yes
WSNTSPVGNGYIKPPVPPASGTHREK	0.004778	YIKPPVPPA	0.311162	7.6119	HLA-DRB1*01:01	0.163687	-0.507014	-0.670701	0.213452	0.386926	0.26402	Yes
YLNDLDSALIPVIHGGTSNSSLPLEI	0.001664	LIPVIHGGT	0.458478	7.6119	HLA-DRB1*01:01	0.163687	-0.338681	-0.502368	0.314508	0.386926	0.26402	Yes
YLSNGPLSPGGARTYLQMK	0.000492	LSPGGARTY	0.662102	7.6119	HLA-DRB1*01:01	0.163687	-0.179075	-0.342762	0.454191	0.386926	0.26402	Yes
YSNRVVDLMAHMASKE	0.92042	VVDLMAHMA	0.00495808	7.6119	HLA-DRB1*01:01	0.163687	-2.30469	-2.46837	0.00340116	0.386926	0.26402	Yes
IPADLRIISANGCKVDNS	0.902978	LRIISANGC	0.00581316	7.6119	HLA-DRB1*01:01	0.163687	-2.23559	-2.39927	0.00398773	0.386926	0.26402	Yes
KMRMATPLLMQALP	0.325953	MRMATPLLM	0.0347901	7.6119	HLA-DRB1*01:01	0.163687	-1.45854	-1.62223	0.0238655	0.386926	0.26402	Yes
KPPKPVSKMRMATPLLMQALPM	0.479717	MRMATPLLM	0.024201	7.6119	HLA-DRB1*01:01	0.163687	-1.61617	-1.77985	0.0166015	0.386926	0.26402	Yes
LPSYEEALSLPSKTP	0.809906	YEEALSLPS	0.00969904	7.6119	HLA-DRB1*01:01	0.163687	-2.01327	-2.17696	0.00665338	0.386926	0.26402	Yes
LPSYEEALSLPSKTPE	0.719447	YEEALSLPS	0.0132656	7.6119	HLA-DRB1*01:01	0.163687	-1.87727	-2.04096	0.00909996	0.386926	0.26402	Yes
LPSYEEALSLPSKTPEG	0.596838	YEEALSLPS	0.0183348	7.6119	HLA-DRB1*01:01	0.163687	-1.73672	-1.90041	0.0125774	0.386926	0.26402	Yes
VGSDWRFLRGYHQY	0.640957	WRFLRGYHQ	0.016462	7.6119	HLA-DRB1*01:01	0.163687	-1.78352	-1.9472	0.0112927	0.386926	0.26402	Yes
VVLPSYEEALSLPSKTPE	0.600316	YEEALSLPS	0.0181781	7.6119	HLA-DRB1*01:01	0.163687	-1.74045	-1.90414	0.0124699	0.386926	0.26402	Yes
YKHTLNQIDSVKVWPRRP	0.457915	LNQIDSVKV	0.0253881	7.6119	HLA-DRB1*01:01	0.163687	-1.59537	-1.75906	0.0174158	0.386926	0.26402	Yes
YKHTLNQIDSVKVWPRRPT	0.298943	LNQIDSVKV	0.0372994	7.6119	HLA-DRB1*01:01	0.163687	-1.4283	-1.59198	0.0255868	0.386926	0.26402	Yes
GRILSGVVTK	2.5e-05	GRILSGVVT	0.954916	7.6119	HLA-DRB1*01:01	0.163687	-0.0200348	-0.183721	0.655056	0.386926	0.26402	Yes
LGEYGFQNALIVR	0.872575	YGFQNALIV	0.00713233	7.6119	HLA-DRB1*01:01	0.163687	-2.14677	-2.31046	0.00489266	0.386926	0.26402	Yes
GRFASFEAQGAL	0.766103	FASFEAQGA	0.0114457	7.6119	HLA-DRB1*01:01	0.163687	-1.94136	-2.10504	0.00785159	0.386926	0.26402	Yes
GRVAPRSGL	0	GRVAPRSGL	0.993277	7.6119	HLA-DRB1*01:01	0.163687	-0.00292981	-0.166616	0.681371	0.386926	0.26402	Yes
HRAQVIYTR	0	HRAQVIYTR	0.993276	7.6119	HLA-DRB1*01:01	0.163687	-0.00293014	-0.166617	0.68137	0.386926	0.26402	Yes
KRASVFVKL	1e-06	KRASVFVKL	0.986862	7.6119	HLA-DRB1*01:01	0.163687	-0.00574357	-0.16943	0.676971	0.386926	0.26402	Yes
KRNDYVHAL	0	KRNDYVHAL	0.993275	7.6119	HLA-DRB1*01:01	0.163687	-0.00293047	-0.166617	0.68137	0.386926	0.26402	Yes
RRAGIKVTV	1e-06	RRAGIKVTV	0.986825	7.6119	HLA-DRB1*01:01	0.163687	-0.00575966	-0.169446	0.676946	0.386926	0.26402	Yes
RRFVNVVPTFGK	0.295802	FVNVVPTFG	0.0376128	7.6119	HLA-DRB1*01:01	0.163687	-1.42466	-1.58835	0.0258017	0.386926	0.26402	Yes
RRIKEIVKKH	8e-06	RIKEIVKKH	0.973935	7.6119	HLA-DRB1*01:01	0.163687	-0.0114699	-0.175156	0.668103	0.386926	0.26402	Yes
RRISGVDRYY	5e-06	RISGVDRYY	0.978985	7.6119	HLA-DRB1*01:01	0.163687	-0.00922394	-0.17291	0.671567	0.386926	0.26402	Yes
AEPNYHSLPSARTDEQ	0.987067	YHSLPSART	0.000645409	7.6119	HLA-DRB1*01:01	0.163687	-3.19017	-3.35385	0.00044274	0.386926	0.26402	Yes
APSTYAHLSPAKTPPP	0.98676	YAHLSPAKT	0.000675254	7.6119	HLA-DRB1*01:01	0.163687	-3.17053	-3.33422	0.000463213	0.386926	0.26402	Yes
APSTYAHLSPAKTPPPP	0.981274	YAHLSPAKT	0.00109309	7.6119	HLA-DRB1*01:01	0.163687	-2.96134	-3.12503	0.000749842	0.386926	0.26402	Yes
APSTYAHLSPAKTPPPPA	0.963572	YAHLSPAKT	0.00242718	7.6119	HLA-DRB1*01:01	0.163687	-2.6149	-2.77858	0.00166501	0.386926	0.26402	Yes
ARNFERNKAIKVIIA	0.902859	FERNKAIKV	0.00581987	7.6119	HLA-DRB1*01:01	0.163687	-2.23509	-2.39877	0.00399233	0.386926	0.26402	Yes
ASNDMYHSRALQVVRA	0.409718	MYHSRALQV	0.0283928	7.6119	HLA-DRB1*01:01	0.163687	-1.54679	-1.71048	0.019477	0.386926	0.26402	Yes
DAGSYKAQINQRNFE	0.550253	YKAQINQRN	0.0205859	7.6119	HLA-DRB1*01:01	0.163687	-1.68643	-1.85012	0.0141216	0.386926	0.26402	Yes
DAQFEVIKGQTIE	0.990159	FEVIKGQTI	0.000420821	7.6119	HLA-DRB1*01:01	0.163687	-3.3759	-3.53959	0.000288676	0.386926	0.26402	Yes
DAQFEVIKGQTIEVR	0.996221	FEVIKGQTI	6.19294e-05	7.6119	HLA-DRB1*01:01	0.163687	-4.2081	-4.37179	4.24825e-05	0.386926	0.26402	Yes
DKQPYSKLPGVSLLKP	0.988091	YSKLPGVSL	0.000571541	7.6119	HLA-DRB1*01:01	0.163687	-3.24295	-3.40664	0.000392068	0.386926	0.26402	Yes
DKQPYSKLPGVSLLKPL	0.979849	YSKLPGVSL	0.00120277	7.6119	HLA-DRB1*01:01	0.163687	-2.91982	-3.0835	0.000825082	0.386926	0.26402	Yes
DTGSYRAQISTKTSAK	0.980469	YRAQISTKT	0.00115801	7.6119	HLA-DRB1*01:01	0.163687	-2.93629	-3.09998	0.000794372	0.386926	0.26402	Yes
EDTGSYRAQISTKTSAK	0.970472	YRAQISTKT	0.00193026	7.6119	HLA-DRB1*01:01	0.163687	-2.71438	-2.87807	0.00132412	0.386926	0.26402	Yes
EEFKKLTSIKIQNDK	0.984655	FKKLTSIKI	0.000843881	7.6119	HLA-DRB1*01:01	0.163687	-3.07372	-3.23741	0.000578888	0.386926	0.26402	Yes
EVQVFAPANALPARSE	0.981293	FAPANALPA	0.00109234	7.6119	HLA-DRB1*01:01	0.163687	-2.96164	-3.12533	0.00074933	0.386926	0.26402	Yes
GDKVYVHLKNLASRPY	0.942508	YVHLKNLAS	0.00373442	7.6119	HLA-DRB1*01:01	0.163687	-2.42778	-2.59146	0.00256175	0.386926	0.26402	Yes
GPPGEAGYKAFSSLLASSA	0.604998	YKAFSSLLA	0.0179894	7.6119	HLA-DRB1*01:01	0.163687	-1.74498	-1.90867	0.0123404	0.386926	0.26402	Yes
GPPGEAGYKAFSSLLASSAVSPE	0.513713	FSSLLASSA	0.0223923	7.6119	HLA-DRB1*01:01	0.163687	-1.6499	-1.81359	0.0153608	0.386926	0.26402	Yes
GPPGEAGYKAFSSLLASSAVSPEK	0.549854	FSSLLASSA	0.0205986	7.6119	HLA-DRB1*01:01	0.163687	-1.68616	-1.84985	0.0141303	0.386926	0.26402	Yes
GSYRAQISTKTSAK	0.950645	YRAQISTKT	0.00324122	7.6119	HLA-DRB1*01:01	0.163687	-2.48929	-2.65298	0.00222342	0.386926	0.26402	Yes
GYKAFSSLLASSAVSP	0.922134	FSSLLASSA	0.00485586	7.6119	HLA-DRB1*01:01	0.163687	-2.31373	-2.47742	0.00333104	0.386926	0.26402	Yes
GYKAFSSLLASSAVSPE	0.857283	FSSLLASSA	0.00778893	7.6119	HLA-DRB1*01:01	0.163687	-2.10852	-2.27221	0.00534307	0.386926	0.26402	Yes
HPRYYISANVTGFK	0.531025	YYISANVTG	0.0215186	7.6119	HLA-DRB1*01:01	0.163687	-1.66719	-1.83087	0.0147614	0.386926	0.26402	Yes
IPADTFAALKNPNAML	0.890849	FAALKNPNA	0.0063362	7.6119	HLA-DRB1*01:01	0.163687	-2.19817	-2.36186	0.00434652	0.386926	0.26402	Yes
KAFSSLLASSAVSPE	0.816462	FSSLLASSA	0.00944162	7.6119	HLA-DRB1*01:01	0.163687	-2.02495	-2.18864	0.00647679	0.386926	0.26402	Yes
KLPSVEGLHAIVVSDRDG	0.750876	VEGLHAIVV	0.012065	7.6119	HLA-DRB1*01:01	0.163687	-1.91847	-2.08216	0.00827641	0.386926	0.26402	Yes
LPSQAFEYILYNKGI	0.019294	FEYILYNKG	0.172841	7.6119	HLA-DRB1*01:01	0.163687	-0.762353	-0.926039	0.118566	0.386926	0.26402	Yes
LPSVEGLHAIVVSDR	0.934404	VEGLHAIVV	0.00418135	7.6119	HLA-DRB1*01:01	0.163687	-2.37868	-2.54237	0.00286834	0.386926	0.26402	Yes
LPYLFQMPAYASSS	0.640464	YLFQMPAYA	0.0164844	7.6119	HLA-DRB1*01:01	0.163687	-1.78293	-1.94661	0.011308	0.386926	0.26402	Yes
LPYLFQMPAYASSSK	0.658865	LFQMPAYAS	0.0157532	7.6119	HLA-DRB1*01:01	0.163687	-1.80263	-1.96632	0.0108064	0.386926	0.26402	Yes
NFERNKAIKVIIA	0.37561	FERNKAIKV	0.0307491	7.6119	HLA-DRB1*01:01	0.163687	-1.51217	-1.67585	0.0210933	0.386926	0.26402	Yes
NGYFLIERGKNM	0.503364	FLIERGKNM	0.0229169	7.6119	HLA-DRB1*01:01	0.163687	-1.63984	-1.80353	0.0157206	0.386926	0.26402	Yes
NPGGYVAYSKAATVTGK	0.674168	VAYSKAATV	0.0151018	7.6119	HLA-DRB1*01:01	0.163687	-1.82097	-1.98466	0.0103596	0.386926	0.26402	Yes
SHPRYYISANVTGFK	0.522351	YYISANVTG	0.0219506	7.6119	HLA-DRB1*01:01	0.163687	-1.65855	-1.82224	0.0150578	0.386926	0.26402	Yes
TGSWIGLRNLDLKG	0.93232	WIGLRNLDL	0.00429551	7.6119	HLA-DRB1*01:01	0.163687	-2.36699	-2.53067	0.00294665	0.386926	0.26402	Yes
TGSYRAQISTKTSAK	0.980585	YRAQISTKT	0.00114756	7.6119	HLA-DRB1*01:01	0.163687	-2.94022	-3.10391	0.000787206	0.386926	0.26402	Yes
TRPYHSLPSEAVFA	0.994412	YHSLPSEAV	0.000142512	7.6119	HLA-DRB1*01:01	0.163687	-3.84615	-4.00983	9.7761e-05	0.386926	0.26402	Yes
TRPYHSLPSEAVFAN	0.995975	YHSLPSEAV	7.0883e-05	7.6119	HLA-DRB1*01:01	0.163687	-4.14946	-4.31314	4.86246e-05	0.386926	0.26402	Yes
VEYHFLSPYVSPK	0.921049	YHFLSPYVS	0.00491854	7.6119	HLA-DRB1*01:01	0.163687	-2.30816	-2.47185	0.00337403	0.386926	0.26402	Yes
VEYHFLSPYVSPKE	0.944373	YHFLSPYVS	0.00362921	7.6119	HLA-DRB1*01:01	0.163687	-2.44019	-2.60387	0.00248958	0.386926	0.26402	Yes
VGPFAPGITEKAPEEKK	0.360027	FAPGITEKA	0.0319444	7.6119	HLA-DRB1*01:01	0.163687	-1.49561	-1.65929	0.0219133	0.386926	0.26402	Yes
VQVFAPANALPARSE	0.984412	FAPANALPA	0.000865519	7.6119	HLA-DRB1*01:01	0.163687	-3.06272	-3.22641	0.000593732	0.386926	0.26402	Yes
WIALHGNQITSDK	0.210203	WIALHGNQI	0.0482684	7.6119	HLA-DRB1*01:01	0.163687	-1.31634	-1.48002	0.0331113	0.386926	0.26402	Yes
YDAQFEVIKGQTIE	0.989663	FEVIKGQTI	0.000453651	7.6119	HLA-DRB1*01:01	0.163687	-3.34328	-3.50696	0.000311197	0.386926	0.26402	Yes
YKAFSSLLASSAVSPE	0.885352	FSSLLASSA	0.00658839	7.6119	HLA-DRB1*01:01	0.163687	-2.18122	-2.34491	0.00451953	0.386926	0.26402	Yes
YPRKNLFLVEVTQLTESDSG	0.062609	FLVEVTQLT	0.0977738	7.6119	HLA-DRB1*01:01	0.163687	-1.00978	-1.17346	0.0670712	0.386926	0.26402	Yes
TPTLVEVSR	0	TPTLVEVSR	0.993249	7.6119	HLA-DRB1*01:01	0.163687	-0.00294189	-0.166628	0.681352	0.386926	0.26402	Yes
AEILELAGNAARDNK	0.924786	ILELAGNAA	0.00472529	7.6119	HLA-DRB1*01:01	0.163687	-2.32557	-2.48926	0.00324147	0.386926	0.26402	Yes
AIVEALNGKEVAAQVKAPLVLKD	0.067978	VEALNGKEV	0.0936962	7.6119	HLA-DRB1*01:01	0.163687	-1.02828	-1.19196	0.064274	0.386926	0.26402	Yes
EKNPLPSKETIEQEKQAGES	0.000284	ETIEQEKQA	0.750118	7.6119	HLA-DRB1*01:01	0.163687	-0.12487	-0.288557	0.514568	0.386926	0.26402	Yes
FSNKITPIQSKEAY	0.300633	ITPIQSKEA	0.0371367	7.6119	HLA-DRB1*01:01	0.163687	-1.4302	-1.59388	0.0254752	0.386926	0.26402	Yes
FVILRKNPNYDL	0.001596	LRKNPNYDL	0.465101	7.6119	HLA-DRB1*01:01	0.163687	-0.332453	-0.496139	0.319051	0.386926	0.26402	Yes
GGGGGGGLGSGGSIR	0.000113	GGGLGSGGS	0.866487	7.6119	HLA-DRB1*01:01	0.163687	-0.062238	-0.225925	0.594395	0.386926	0.26402	Yes
GGGGGGGLGSGGSIRSS	0.000385	LGSGGSIRS	0.702423	7.6119	HLA-DRB1*01:01	0.163687	-0.153401	-0.317088	0.481851	0.386926	0.26402	Yes
GPVGVFEWEAFARG	0.006062	VFEWEAFAR	0.283257	7.6119	HLA-DRB1*01:01	0.163687	-0.54782	-0.711506	0.194309	0.386926	0.26402	Yes
GPVGVFEWEAFARGTK	0.028402	FEWEAFARG	0.144725	7.6119	HLA-DRB1*01:01	0.163687	-0.839458	-1.00314	0.0992786	0.386926	0.26402	Yes
GPVGVFEWEAFARGTKA	0.034564	FEWEAFARG	0.131936	7.6119	HLA-DRB1*01:01	0.163687	-0.879635	-1.04332	0.0905062	0.386926	0.26402	Yes
GSGGGSYGSGGGGGGHGSY	0.000718	YGSGGGGGG	0.597966	7.6119	HLA-DRB1*01:01	0.163687	-0.223324	-0.38701	0.410194	0.386926	0.26402	Yes
HPVTGQFLYQDSNWASKVEK	0.620556	FLYQDSNWA	0.0173193	7.6119	HLA-DRB1*01:01	0.163687	-1.76147	-1.92516	0.0118808	0.386926	0.26402	Yes
LPRGFGSLPALEVL	0.964466	FGSLPALEV	0.00236526	7.6119	HLA-DRB1*01:01	0.163687	-2.62612	-2.78981	0.00162253	0.386926	0.26402	Yes
LPSYEEALSLPSKTPEGGPAPPP	0.059177	YEEALSLPS	0.100685	7.6119	HLA-DRB1*01:01	0.163687	-0.997034	-1.16072	0.0690684	0.386926	0.26402	Yes
NKEGLELLKTAIGKAG	0.723451	LELLKTAIG	0.0131059	7.6119	HLA-DRB1*01:01	0.163687	-1.88253	-2.04622	0.00899043	0.386926	0.26402	Yes
PSSGLGVTKQDLGPVPM	0.001732	VTKQDLGPV	0.452139	7.6119	HLA-DRB1*01:01	0.163687	-0.344728	-0.508415	0.31016	0.386926	0.26402	Yes
RSAVPPGADKKAEAGAGSATE	0.000302	KKAEAGAGS	0.740783	7.6119	HLA-DRB1*01:01	0.163687	-0.130309	-0.293996	0.508165	0.386926	0.26402	Yes
RSGGGGGGGLGSGGSIRSS	0.000104	LGSGGSIRS	0.874482	7.6119	HLA-DRB1*01:01	0.163687	-0.0582492	-0.221936	0.59988	0.386926	0.26402	Yes
SGGGGGGGLGSGGSIR	5.1e-05	GGGLGSGGS	0.926048	7.6119	HLA-DRB1*01:01	0.163687	-0.0333665	-0.197053	0.635253	0.386926	0.26402	Yes
SGGGGGGGLGSGGSIRSS	0.000192	LGSGGSIRS	0.805366	7.6119	HLA-DRB1*01:01	0.163687	-0.0940069	-0.257693	0.552467	0.386926	0.26402	Yes
SRSGGGGGGGLGSGGSIR	2.1e-05	GGLGSGGSI	0.958566	7.6119	HLA-DRB1*01:01	0.163687	-0.0183782	-0.182065	0.65756	0.386926	0.26402	Yes
SRSGGGGGGGLGSGGSIRSS	6.7e-05	LGSGGSIRS	0.909704	7.6119	HLA-DRB1*01:01	0.163687	-0.0410999	-0.204786	0.624042	0.386926	0.26402	Yes
SRSGGGGGGGLGSGGSIRSSY	0.000123	LGSGGSIRS	0.857612	7.6119	HLA-DRB1*01:01	0.163687	-0.0667093	-0.230396	0.588307	0.386926	0.26402	Yes
SSGAHGEEGSARMWKTL	0.000131	HGEEGSARM	0.851334	7.6119	HLA-DRB1*01:01	0.163687	-0.0699002	-0.233587	0.584001	0.386926	0.26402	Yes
SSGAHGEEGSARMWKTLTF	5.3e-05	HGEEGSARM	0.923752	7.6119	HLA-DRB1*01:01	0.163687	-0.0344445	-0.198131	0.633678	0.386926	0.26402	Yes
SSGAHGEEGSARMWKTLTFF	3.9e-05	HGEEGSARM	0.938796	7.6119	HLA-DRB1*01:01	0.163687	-0.0274288	-0.191115	0.643998	0.386926	0.26402	Yes
TTGNYRIESVLSSSGK	0.763243	YRIESVLSS	0.011551	7.6119	HLA-DRB1*01:01	0.163687	-1.93738	-2.10107	0.00792376	0.386926	0.26402	Yes
TTGNYRIESVLSSSGKR	0.658542	YRIESVLSS	0.0157696	7.6119	HLA-DRB1*01:01	0.163687	-1.80218	-1.96587	0.0108177	0.386926	0.26402	Yes
VDDTQFVRFDNDAASPR	0.717298	FVRFDNDAA	0.0133573	7.6119	HLA-DRB1*01:01	0.163687	-1.87428	-2.03797	0.00916292	0.386926	0.26402	Yes
VLPSYEEALSLPSKTPE	0.691388	YEEALSLPS	0.0143482	7.6119	HLA-DRB1*01:01	0.163687	-1.8432	-2.00689	0.00984264	0.386926	0.26402	Yes
VTQEIVTERSVSSRQAQ	0.662059	IVTERSVSS	0.015601	7.6119	HLA-DRB1*01:01	0.163687	-1.80685	-1.97053	0.010702	0.386926	0.26402	Yes
VTYVPVTTFKNLQTVNVDEN	0.814055	FKNLQTVNV	0.00953563	7.6119	HLA-DRB1*01:01	0.163687	-2.02065	-2.18434	0.00654128	0.386926	0.26402	Yes
WTSDTQGDEAEAGEGGEN	0.000837	DEAEAGEGG	0.571859	7.6119	HLA-DRB1*01:01	0.163687	-0.242711	-0.406398	0.392286	0.386926	0.26402	Yes
YASGRTTGIVMDSGD	0.000521	RTTGIVMDS	0.65241	7.6119	HLA-DRB1*01:01	0.163687	-0.18548	-0.349166	0.447542	0.386926	0.26402	Yes
YLTAEILELAGNAARDNK	0.953355	ILELAGNAA	0.00307856	7.6119	HLA-DRB1*01:01	0.163687	-2.51165	-2.67534	0.00211184	0.386926	0.26402	Yes
YLTAEILELAGNAARDNKK	0.91094	ILELAGNAA	0.00541173	7.6119	HLA-DRB1*01:01	0.163687	-2.26666	-2.43035	0.00371236	0.386926	0.26402	Yes
YVGEIIGKRGIIGYDV	0.048772	IIGKRGIIG	0.111206	7.6119	HLA-DRB1*01:01	0.163687	-0.953873	-1.11756	0.0762853	0.386926	0.26402	Yes
RVAPEEHPVLL	8.2e-05	VAPEEHPVL	0.894875	7.6119	HLA-DRB1*01:01	0.163687	-0.0482375	-0.211924	0.613869	0.386926	0.26402	Yes
DIFERIAGEASRLAH	0.682184	FERIAGEAS	0.0147638	7.6119	HLA-DRB1*01:01	0.163687	-1.8308	-1.99449	0.0101277	0.386926	0.26402	Yes
GRIRDIDLKR	3e-06	RIRDIDLKR	0.983193	7.6119	HLA-DRB1*01:01	0.163687	-0.00736111	-0.171048	0.674454	0.386926	0.26402	Yes
LGKVTIAQGGVLPNI	0.31429	VTIAQGGVL	0.035834	7.6119	HLA-DRB1*01:01	0.163687	-1.4457	-1.60939	0.0245815	0.386926	0.26402	Yes
QRFPLSFGF	0	QRFPLSFGF	0.99326	7.6119	HLA-DRB1*01:01	0.163687	-0.00293699	-0.166624	0.68136	0.386926	0.26402	Yes
RRFTTSVVR	1e-06	RRFTTSVVR	0.986348	7.6119	HLA-DRB1*01:01	0.163687	-0.00596986	-0.169656	0.676618	0.386926	0.26402	Yes
HPINEYYIADAAEDQ	0.403162	YYIADAAED	0.0288322	7.6119	HLA-DRB1*01:01	0.163687	-1.54012	-1.70381	0.0197784	0.386926	0.26402	Yes
KRLASSVLR	1e-06	KRLASSVLR	0.986349	7.6119	HLA-DRB1*01:01	0.163687	-0.00596954	-0.169656	0.676619	0.386926	0.26402	Yes
PGLARQAPKPRKQ	0.004258	LARQAPKPR	0.325238	7.6119	HLA-DRB1*01:01	0.163687	-0.487798	-0.651485	0.223108	0.386926	0.26402	Yes
TVETFASIVAHELGHN	0.983055	FASIVAHEL	0.00095804	7.6119	HLA-DRB1*01:01	0.163687	-3.01862	-3.1823	0.000657199	0.386926	0.26402	Yes
ALAAAGYDVEKN	0.00013	ALAAAGYDV	0.851915	7.6119	HLA-DRB1*01:01	0.163687	-0.0696038	-0.23329	0.584399	0.386926	0.26402	Yes
ALAAGGYDVEKN	6.2e-05	LAAGGYDVE	0.914481	7.6119	HLA-DRB1*01:01	0.163687	-0.0388254	-0.202512	0.627318	0.386926	0.26402	Yes
EEEDKKEDVGTVVG	0.001065	DKKEDVGTV	0.531447	7.6119	HLA-DRB1*01:01	0.163687	-0.27454	-0.438226	0.364564	0.386926	0.26402	Yes
LQVLTKNKDNHNL	0.000666	LTKNKDNHN	0.610896	7.6119	HLA-DRB1*01:01	0.163687	-0.214033	-0.377719	0.419064	0.386926	0.26402	Yes
VPPVQVSPLIK	4.1e-05	PVQVSPLIK	0.936425	7.6119	HLA-DRB1*01:01	0.163687	-0.0285268	-0.192213	0.642372	0.386926	0.26402	Yes
YIKSTMGKPQRLY	0.00109	STMGKPQRL	0.527517	7.6119	HLA-DRB1*01:01	0.163687	-0.277764	-0.44145	0.361868	0.386926	0.26402	Yes
YVTTSTRTYSLG	0.000228	TTSTRTYSL	0.781765	7.6119	HLA-DRB1*01:01	0.163687	-0.106924	-0.27061	0.536278	0.386926	0.26402	Yes
YVTTSTRTYSLGSA	0.000367	TTSTRTYSL	0.710304	7.6119	HLA-DRB1*01:01	0.163687	-0.148556	-0.312242	0.487257	0.386926	0.26402	Yes
DLNPLIKLSGAYLVDDSD	0.892365	LIKLSGAYL	0.00627651	7.6119	HLA-DRB1*01:01	0.163687	-2.20228	-2.36597	0.00430558	0.386926	0.26402	Yes
IFVKTLTGKTITLEVEPS	0.027076	VKTLTGKTI	0.148094	7.6119	HLA-DRB1*01:01	0.163687	-0.829462	-0.993149	0.10159	0.386926	0.26402	Yes
LATWTIQGAANALSGDVW	0.629194	WTIQGAANA	0.0169679	7.6119	HLA-DRB1*01:01	0.163687	-1.77037	-1.93406	0.0116397	0.386926	0.26402	Yes
LDHKFDLMYAKRAFVHWY	0.893089	FDLMYAKRA	0.0062489	7.6119	HLA-DRB1*01:01	0.163687	-2.2042	-2.36788	0.00428664	0.386926	0.26402	Yes
TPKIQVYSRHPAENGKSN	0.325877	IQVYSRHPA	0.0347961	7.6119	HLA-DRB1*01:01	0.163687	-1.45847	-1.62216	0.0238695	0.386926	0.26402	Yes
NNKYAASSYLSLTPE	0.060488	YAASSYLSL	0.0995519	7.6119	HLA-DRB1*01:01	0.163687	-1.00195	-1.16564	0.0682909	0.386926	0.26402	Yes
SNNKYAASSYLSLTPE	0.046883	YAASSYLSL	0.113499	7.6119	HLA-DRB1*01:01	0.163687	-0.945006	-1.10869	0.0778587	0.386926	0.26402	Yes
NAKYAISMARKIGA	0.941441	YAISMARKI	0.00379485	7.6119	HLA-DRB1*01:01	0.163687	-2.4208	-2.58449	0.00260321	0.386926	0.26402	Yes
NNAKYAISMARKIGA	0.922436	YAISMARKI	0.00484019	7.6119	HLA-DRB1*01:01	0.163687	-2.31514	-2.47882	0.00332029	0.386926	0.26402	Yes
AKHAVSEGTKAVTKYTSSK	0.000317	AVSEGTKAV	0.733401	7.6119	HLA-DRB1*01:01	0.163687	-0.134658	-0.298345	0.503101	0.386926	0.26402	Yes
GFVKVVKNKAYFK	0.012124	FVKVVKNKA	0.212179	7.6119	HLA-DRB1*01:01	0.163687	-0.673298	-0.836984	0.145551	0.386926	0.26402	Yes
KIDDIRKPGESEE	6e-05	DDIRKPGES	0.916857	7.6119	HLA-DRB1*01:01	0.163687	-0.0376983	-0.201385	0.628949	0.386926	0.26402	Yes
MVAKEARNVTMETE	0.000287	AKEARNVTM	0.748173	7.6119	HLA-DRB1*01:01	0.163687	-0.125998	-0.289685	0.513234	0.386926	0.26402	Yes
SLVSKGTLVQTKGTGASGSF	0.299496	LVQTKGTGA	0.0372412	7.6119	HLA-DRB1*01:01	0.163687	-1.42898	-1.59266	0.0255468	0.386926	0.26402	Yes
VQTKGTGASGSF	5.4e-05	TKGTGASGS	0.922819	7.6119	HLA-DRB1*01:01	0.163687	-0.0348836	-0.19857	0.633038	0.386926	0.26402	Yes
GPTEEIRALHAAIGG	0.870325	IRALHAAIG	0.00722261	7.6119	HLA-DRB1*01:01	0.163687	-2.14131	-2.30499	0.00495459	0.386926	0.26402	Yes
GPTEEIRALHAAIGGIP	0.939822	IRALHAAIG	0.00388887	7.6119	HLA-DRB1*01:01	0.163687	-2.41018	-2.57386	0.0026677	0.386926	0.26402	Yes
HNNYQAQSAVPLRHE	0.998092	YQAQSAVPL	1.19382e-05	7.6119	HLA-DRB1*01:01	0.163687	-4.92306	-5.08675	8.1894e-06	0.386926	0.26402	Yes
IKEEHVIIQAEF	9.6e-05	EHVIIQAEF	0.882022	7.6119	HLA-DRB1*01:01	0.163687	-0.0545208	-0.218207	0.605052	0.386926	0.26402	Yes
IQDYLQQLTGARTVPR	0.94695	LQQLTGART	0.00346954	7.6119	HLA-DRB1*01:01	0.163687	-2.45973	-2.62341	0.00238004	0.386926	0.26402	Yes
NSLYLQMNSLRAEDT	0.957473	YLQMNSLRA	0.00280846	7.6119	HLA-DRB1*01:01	0.163687	-2.55153	-2.71522	0.00192656	0.386926	0.26402	Yes
NTLYLQMNSLRAEDT	0.958519	YLQMNSLRA	0.00274355	7.6119	HLA-DRB1*01:01	0.163687	-2.56169	-2.72537	0.00188203	0.386926	0.26402	Yes
SGTLVLLQGARGFA	0.954295	LVLLQGARG	0.00302036	7.6119	HLA-DRB1*01:01	0.163687	-2.51994	-2.68363	0.00207192	0.386926	0.26402	Yes
VKEPVAVLKANRVWG	0.99052	VAVLKANRV	0.000398437	7.6119	HLA-DRB1*01:01	0.163687	-3.39964	-3.56333	0.000273321	0.386926	0.26402	Yes
VKEPVAVLKANRVWGAL	0.989661	VAVLKANRV	0.000454398	7.6119	HLA-DRB1*01:01	0.163687	-3.34256	-3.50625	0.000311709	0.386926	0.26402	Yes
YLQMNSLRAED	0.007576	YLQMNSLRA	0.258454	7.6119	HLA-DRB1*01:01	0.163687	-0.587616	-0.751302	0.177295	0.386926	0.26402	Yes
YLQMNSLRAEDT	0.038592	MNSLRAEDT	0.125118	7.6119	HLA-DRB1*01:01	0.163687	-0.902682	-1.06637	0.0858285	0.386926	0.26402	Yes
RLLRGYHQDAYDGKD	0.001309	GYHQDAYDG	0.497114	7.6119	HLA-DRB1*01:01	0.163687	-0.303544	-0.467231	0.341012	0.386926	0.26402	Yes
RVEYHFLSPYVSP	0.929378	YHFLSPYVS	0.00446339	7.6119	HLA-DRB1*01:01	0.163687	-2.35033	-2.51402	0.00306181	0.386926	0.26402	Yes
GSDWRFLRGYHQY	0.669658	WRFLRGYHQ	0.0152928	7.6119	HLA-DRB1*01:01	0.163687	-1.81551	-1.9792	0.0104906	0.386926	0.26402	Yes
GSDWRFLRGYHQYAYD	0.65547	WRFLRGYHQ	0.0158875	7.6119	HLA-DRB1*01:01	0.163687	-1.79894	-1.96263	0.0108986	0.386926	0.26402	Yes
VGSDWRFLRGYHQYAYD	0.586924	WRFLRGYHQ	0.0187833	7.6119	HLA-DRB1*01:01	0.163687	-1.72623	-1.88992	0.012885	0.386926	0.26402	Yes
ALKRQGRTLYG	2e-05	LKRQGRTLY	0.960423	7.6119	HLA-DRB1*01:01	0.163687	-0.0175373	-0.181224	0.658834	0.386926	0.26402	Yes
ALKRQGRTLYGFGG	0.000329	GRTLYGFGG	0.727358	7.6119	HLA-DRB1*01:01	0.163687	-0.138252	-0.301938	0.498956	0.386926	0.26402	Yes
LIKTVETRDGQVINETSQ	0.004937	VETRDGQVI	0.307265	7.6119	HLA-DRB1*01:01	0.163687	-0.512487	-0.676173	0.210779	0.386926	0.26402	Yes
LTQQGSVLR	1e-06	LTQQGSVLR	0.9864	7.6119	HLA-DRB1*01:01	0.163687	-0.00594687	-0.169633	0.676654	0.386926	0.26402	Yes
QYMQADQAAGGLR	0.01766	YMQADQAAG	0.179755	7.6119	HLA-DRB1*01:01	0.163687	-0.745319	-0.909006	0.123309	0.386926	0.26402	Yes
SAVRAQSSVPGVR	0.263744	VRAQSSVPG	0.0410286	7.6119	HLA-DRB1*01:01	0.163687	-1.38691	-1.5506	0.0281449	0.386926	0.26402	Yes
VETRDGQVI	0	VETRDGQVI	0.993679	7.6119	HLA-DRB1*01:01	0.163687	-0.00275401	-0.166441	0.681647	0.386926	0.26402	Yes
WYNQCHAAN	0	WYNQCHAAN	0.993678	7.6119	HLA-DRB1*01:01	0.163687	-0.00275433	-0.166441	0.681646	0.386926	0.26402	Yes
KPVSKMRMATPLLMQ	0.588396	MRMATPLLM	0.0187198	7.6119	HLA-DRB1*01:01	0.163687	-1.7277	-1.89138	0.0128415	0.386926	0.26402	Yes
KPVSKMRMATPLLMQA	0.684236	MRMATPLLM	0.0146713	7.6119	HLA-DRB1*01:01	0.163687	-1.83353	-1.99722	0.0100643	0.386926	0.26402	Yes
MATPLLMQALP	2.1e-05	ATPLLMQAL	0.958686	7.6119	HLA-DRB1*01:01	0.163687	-0.0183234	-0.18201	0.657643	0.386926	0.26402	Yes
MRMATPLLMQALP	0.013246	MRMATPLLM	0.20419	7.6119	HLA-DRB1*01:01	0.163687	-0.689965	-0.853652	0.140071	0.386926	0.26402	Yes
AIIDPGDSDIIRSMPEQTGEK	0.027357	IRSMPEQTG	0.147376	7.6119	HLA-DRB1*01:01	0.163687	-0.831575	-0.995261	0.101097	0.386926	0.26402	Yes
DLRHTFSGVASVESSSGEA	0.155429	FSGVASVES	0.0587717	7.6119	HLA-DRB1*01:01	0.163687	-1.23083	-1.39452	0.0403164	0.386926	0.26402	Yes
FPKPPSYNVATTLPSYD	0.665859	YNVATTLPS	0.0154503	7.6119	HLA-DRB1*01:01	0.163687	-1.81106	-1.97475	0.0105986	0.386926	0.26402	Yes
FPKPPSYNVATTLPSYDEA	0.645503	YNVATTLPS	0.0162747	7.6119	HLA-DRB1*01:01	0.163687	-1.78849	-1.95217	0.0111642	0.386926	0.26402	Yes
GKTPIVGQPSIPGGPVR	0.738507	IVGQPSIPG	0.0125433	7.6119	HLA-DRB1*01:01	0.163687	-1.90159	-2.06527	0.0086045	0.386926	0.26402	Yes
IIDPGDSDIIRSMPEQTGEK	0.050853	IRSMPEQTG	0.108927	7.6119	HLA-DRB1*01:01	0.163687	-0.962864	-1.12655	0.0747221	0.386926	0.26402	Yes
IKIISKIENHEGVRR	0.132621	ISKIENHEG	0.0646871	7.6119	HLA-DRB1*01:01	0.163687	-1.18918	-1.35287	0.0443743	0.386926	0.26402	Yes
ISRAQFVPLPVSVSVE	0.507561	FVPLPVSVS	0.02269	7.6119	HLA-DRB1*01:01	0.163687	-1.64416	-1.80785	0.015565	0.386926	0.26402	Yes
KPPSYNVATTLPSYDE	0.870432	YNVATTLPS	0.00721739	7.6119	HLA-DRB1*01:01	0.163687	-2.14162	-2.30531	0.00495101	0.386926	0.26402	Yes
VGKTPIVGQPSIPGGPVR	0.658467	IVGQPSIPG	0.0157756	7.6119	HLA-DRB1*01:01	0.163687	-1.80201	-1.9657	0.0108218	0.386926	0.26402	Yes
AVYKALSDHHIY	0.836164	YKALSDHHI	0.00864549	7.6119	HLA-DRB1*01:01	0.163687	-2.06321	-2.2269	0.00593066	0.386926	0.26402	Yes
GGPGTASRPSSS	2.9e-05	GTASRPSSS	0.950277	7.6119	HLA-DRB1*01:01	0.163687	-0.0221496	-0.185836	0.651874	0.386926	0.26402	Yes
KETIEQEKQAGES	0.001903	IEQEKQAGE	0.437854	7.6119	HLA-DRB1*01:01	0.163687	-0.35867	-0.522357	0.300361	0.386926	0.26402	Yes
ALGRFSQLYPERAL	0.780927	FSQLYPERA	0.0108473	7.6119	HLA-DRB1*01:01	0.163687	-1.96468	-2.12836	0.00744109	0.386926	0.26402	Yes
ALGRFSQLYPERALA	0.890113	FSQLYPERA	0.00637276	7.6119	HLA-DRB1*01:01	0.163687	-2.19567	-2.35936	0.0043716	0.386926	0.26402	Yes
APPPYSSISAESAA	0.956423	YSSISAESA	0.00288382	7.6119	HLA-DRB1*01:01	0.163687	-2.54003	-2.70372	0.00197825	0.386926	0.26402	Yes
APPPYSSISAESAAY	0.981677	YSSISAESA	0.00106175	7.6119	HLA-DRB1*01:01	0.163687	-2.97398	-3.13766	0.000728345	0.386926	0.26402	Yes
ASAFAFLAPARAIL	0.939486	FAFLAPARA	0.00391125	7.6119	HLA-DRB1*01:01	0.163687	-2.40768	-2.57137	0.00268305	0.386926	0.26402	Yes
DGKDYIALNEDLR	0.520091	YIALNEDLR	0.0220469	7.6119	HLA-DRB1*01:01	0.163687	-1.65665	-1.82034	0.0151238	0.386926	0.26402	Yes
DKNNYQQLLGALDYS	0.676746	YQQLLGALD	0.0150026	7.6119	HLA-DRB1*01:01	0.163687	-1.82383	-1.98752	0.0102915	0.386926	0.26402	Yes
DVGEFRAVTELGRPA	0.690084	FRAVTELGR	0.0144087	7.6119	HLA-DRB1*01:01	0.163687	-1.84138	-2.00506	0.0098841	0.386926	0.26402	Yes
EKFEKEAAEMGKG	0.868735	FEKEAAEMG	0.00728827	7.6119	HLA-DRB1*01:01	0.163687	-2.13738	-2.30106	0.00499963	0.386926	0.26402	Yes
ERTFIAIKPDGVQR	0.974448	FIAIKPDGV	0.00161837	7.6119	HLA-DRB1*01:01	0.163687	-2.79092	-2.95461	0.00111018	0.386926	0.26402	Yes
EVNKYQYLLTGRVYDGK	0.891712	YQYLLTGRV	0.00629964	7.6119	HLA-DRB1*01:01	0.163687	-2.20068	-2.36437	0.00432144	0.386926	0.26402	Yes
FQTLVMLETVPQSG	0.31472	LVMLETVPQ	0.0357974	7.6119	HLA-DRB1*01:01	0.163687	-1.44615	-1.60983	0.0245564	0.386926	0.26402	Yes
FQTLVMLETVPQSGEV	0.278097	LVMLETVPQ	0.0394408	7.6119	HLA-DRB1*01:01	0.163687	-1.40405	-1.56774	0.0270557	0.386926	0.26402	Yes
GPMFELLPGESNKIPR	0.845794	FELLPGESN	0.00827019	7.6119	HLA-DRB1*01:01	0.163687	-2.08248	-2.24617	0.00567321	0.386926	0.26402	Yes
HPNQPFYILKPQMPWEL	0.656532	FYILKPQMP	0.0158442	7.6119	HLA-DRB1*01:01	0.163687	-1.80013	-1.96382	0.0108689	0.386926	0.26402	Yes
IKEFGSLPTTPSEQ	0.709645	FGSLPTTPS	0.0136536	7.6119	HLA-DRB1*01:01	0.163687	-1.86475	-2.02844	0.00936612	0.386926	0.26402	Yes
IPVYVSEIAPPGVR	0.964091	YVSEIAPPG	0.00239286	7.6119	HLA-DRB1*01:01	0.163687	-2.62108	-2.78477	0.00164146	0.386926	0.26402	Yes
KGPMFELLPGESN	0.293961	FELLPGESN	0.0377933	7.6119	HLA-DRB1*01:01	0.163687	-1.42258	-1.58627	0.0259256	0.386926	0.26402	Yes
KNLKFVMLHNLEHSM	0.58315	FVMLHNLEH	0.0189758	7.6119	HLA-DRB1*01:01	0.163687	-1.7218	-1.88549	0.0130171	0.386926	0.26402	Yes
LATISTLEAVRGRPF	0.855673	ISTLEAVRG	0.00785906	7.6119	HLA-DRB1*01:01	0.163687	-2.10463	-2.26832	0.00539119	0.386926	0.26402	Yes
LERTFIAIKPDGVQ	0.916928	FIAIKPDGV	0.00512895	7.6119	HLA-DRB1*01:01	0.163687	-2.28997	-2.45366	0.00351837	0.386926	0.26402	Yes
LERTFIAIKPDGVQR	0.973503	FIAIKPDGV	0.00170269	7.6119	HLA-DRB1*01:01	0.163687	-2.76887	-2.93255	0.00116801	0.386926	0.26402	Yes
LERTFIAIKPDGVQRG	0.980909	FIAIKPDGV	0.00112592	7.6119	HLA-DRB1*01:01	0.163687	-2.94849	-3.11218	0.000772363	0.386926	0.26402	Yes
LERTFIAIKPDGVQRGL	0.969726	FIAIKPDGV	0.00197876	7.6119	HLA-DRB1*01:01	0.163687	-2.70361	-2.86729	0.00135739	0.386926	0.26402	Yes
LPVILDIIKGEMSRP	0.554694	LDIIKGEMS	0.0203546	7.6119	HLA-DRB1*01:01	0.163687	-1.69134	-1.85502	0.0139629	0.386926	0.26402	Yes
MNRIIGLKPEGVPR	0.945495	IIGLKPEGV	0.00355684	7.6119	HLA-DRB1*01:01	0.163687	-2.44894	-2.61262	0.00243993	0.386926	0.26402	Yes
MNRIIGLKPEGVPRID	0.920028	IIGLKPEGV	0.00497599	7.6119	HLA-DRB1*01:01	0.163687	-2.30312	-2.46681	0.00341344	0.386926	0.26402	Yes
PGESNKIPR	0	PGESNKIPR	0.993612	7.6119	HLA-DRB1*01:01	0.163687	-0.00278303	-0.16647	0.681601	0.386926	0.26402	Yes
SDVGEFRAVTELGRPA	0.645144	FRAVTELGR	0.0162927	7.6119	HLA-DRB1*01:01	0.163687	-1.78801	-1.95169	0.0111765	0.386926	0.26402	Yes
SKGLFRAAVPSGASTG	0.951518	FRAAVPSGA	0.00319272	7.6119	HLA-DRB1*01:01	0.163687	-2.49584	-2.65953	0.00219015	0.386926	0.26402	Yes
SVRKIVSLLAASEAEVE	0.771132	VSLLAASEA	0.0112652	7.6119	HLA-DRB1*01:01	0.163687	-1.94826	-2.11195	0.00772772	0.386926	0.26402	Yes
TIEKFEKEAAEMGKGSF	0.939895	FEKEAAEMG	0.00388738	7.6119	HLA-DRB1*01:01	0.163687	-2.41034	-2.57403	0.00266667	0.386926	0.26402	Yes
VNKYQYLLTGRVYDGK	0.915806	YQYLLTGRV	0.00517521	7.6119	HLA-DRB1*01:01	0.163687	-2.28607	-2.44976	0.00355011	0.386926	0.26402	Yes
VPGKTFVNITPAEVG	0.962613	FVNITPAEV	0.00248762	7.6119	HLA-DRB1*01:01	0.163687	-2.60422	-2.7679	0.00170647	0.386926	0.26402	Yes
VPGKTFVNITPAEVGV	0.973915	FVNITPAEV	0.00166612	7.6119	HLA-DRB1*01:01	0.163687	-2.77829	-2.94198	0.00114293	0.386926	0.26402	Yes
VRKIVSLLAASEAE	0.644136	VSLLAASEA	0.0163374	7.6119	HLA-DRB1*01:01	0.163687	-1.78682	-1.9505	0.0112072	0.386926	0.26402	Yes
GSGSGWSSSRGPY	0.000103	GSGWSSSRG	0.875435	7.6119	HLA-DRB1*01:01	0.163687	-0.0577759	-0.221462	0.600534	0.386926	0.26402	Yes
VSEGTKAVTKY	2e-05	SEGTKAVTK	0.960392	7.6119	HLA-DRB1*01:01	0.163687	-0.0175514	-0.181238	0.658813	0.386926	0.26402	Yes
AEQYLKIMGKILDQGED	0.877279	YLKIMGKIL	0.00694505	7.6119	HLA-DRB1*01:01	0.163687	-2.15832	-2.32201	0.00476418	0.386926	0.26402	Yes
ATPFLVVRHQLLKT	0.437145	FLVVRHQLL	0.0266461	7.6119	HLA-DRB1*01:01	0.163687	-1.57437	-1.73805	0.0182787	0.386926	0.26402	Yes
AVASFPKKQE	4e-06	VASFPKKQE	0.981082	7.6119	HLA-DRB1*01:01	0.163687	-0.0082945	-0.171981	0.673006	0.386926	0.26402	Yes
EDFLVYKLEAQETLN	0.407506	VYKLEAQET	0.0285345	7.6119	HLA-DRB1*01:01	0.163687	-1.54463	-1.70832	0.0195742	0.386926	0.26402	Yes
EEAEEPDMEEDDDQKAVKDEL	0.000314	MEEDDDQKA	0.734969	7.6119	HLA-DRB1*01:01	0.163687	-0.133731	-0.297417	0.504176	0.386926	0.26402	Yes
FGSAFATPFLVVRHQLLKT	0.083259	FLVVRHQLL	0.0841195	7.6119	HLA-DRB1*01:01	0.163687	-1.0751	-1.23879	0.0577046	0.386926	0.26402	Yes
KVAGAATPK	0	KVAGAATPK	0.993639	7.6119	HLA-DRB1*01:01	0.163687	-0.00277129	-0.166458	0.68162	0.386926	0.26402	Yes
LSEIEMAKAQRDYE	0.235631	IEMAKAQRD	0.0445907	7.6119	HLA-DRB1*01:01	0.163687	-1.35076	-1.51444	0.0305884	0.386926	0.26402	Yes
PGGYVAYSKAATVTG	0.585337	VAYSKAATV	0.0188661	7.6119	HLA-DRB1*01:01	0.163687	-1.72432	-1.888	0.0129418	0.386926	0.26402	Yes
RSLEPLPSSGPDFGGLGEEAE	0.000109	LEPLPSSGP	0.87017	7.6119	HLA-DRB1*01:01	0.163687	-0.060396	-0.224082	0.596922	0.386926	0.26402	Yes
SVRKIVSLLAASEAEV	0.630759	VSLLAASEA	0.016909	7.6119	HLA-DRB1*01:01	0.163687	-1.77188	-1.93557	0.0115993	0.386926	0.26402	Yes
VNIFKFIIPNVVK	0.917212	FKFIIPNVV	0.00511029	7.6119	HLA-DRB1*01:01	0.163687	-2.29155	-2.45524	0.00350558	0.386926	0.26402	Yes
YIADKKDVYE	9e-06	YIADKKDVY	0.972573	7.6119	HLA-DRB1*01:01	0.163687	-0.0120779	-0.175764	0.667169	0.386926	0.26402	Yes
ARFKERVGY	0	ARFKERVGY	0.993635	7.6119	HLA-DRB1*01:01	0.163687	-0.00277292	-0.166459	0.681617	0.386926	0.26402	Yes
KRWEGGYER	0	KRWEGGYER	0.993635	7.6119	HLA-DRB1*01:01	0.163687	-0.00277325	-0.16646	0.681617	0.386926	0.26402	Yes
KRWQGGERSM	3e-06	RWQGGERSM	0.98187	7.6119	HLA-DRB1*01:01	0.163687	-0.00794618	-0.171633	0.673546	0.386926	0.26402	Yes
SRLATLNEK	0	SRLATLNEK	0.993633	7.6119	HLA-DRB1*01:01	0.163687	-0.0027739	-0.16646	0.681616	0.386926	0.26402	Yes
AKPVSQMRMATPLLMRP	0.63485	MRMATPLLM	0.0167374	7.6119	HLA-DRB1*01:01	0.163687	-1.77631	-1.94	0.0114815	0.386926	0.26402	Yes
AKPVSQMRMATPLLMRPM	0.638063	MRMATPLLM	0.0165866	7.6119	HLA-DRB1*01:01	0.163687	-1.78024	-1.94393	0.0113781	0.386926	0.26402	Yes
DPDSRGEYSWAVAQGVKQ	0.782997	YSWAVAQGV	0.0107556	7.6119	HLA-DRB1*01:01	0.163687	-1.96837	-2.13205	0.00737814	0.386926	0.26402	Yes
KVEYHFLSPYVSPRESP	0.949996	YHFLSPYVS	0.00327032	7.6119	HLA-DRB1*01:01	0.163687	-2.48541	-2.6491	0.00224338	0.386926	0.26402	Yes
SAKPVSQMRMATPLLMRP	0.588644	MRMATPLLM	0.0187109	7.6119	HLA-DRB1*01:01	0.163687	-1.72791	-1.89159	0.0128354	0.386926	0.26402	Yes
SAKPVSQMRMATPLLMRPM	0.58636	MRMATPLLM	0.0188139	7.6119	HLA-DRB1*01:01	0.163687	-1.72552	-1.88921	0.012906	0.386926	0.26402	Yes
AAMLDTVVFK	2e-06	AAMLDTVVF	0.983727	7.6119	HLA-DRB1*01:01	0.163687	-0.00712552	-0.170812	0.67482	0.386926	0.26402	Yes
AAVYKALSDHHIY	0.926612	YKALSDHHI	0.00462754	7.6119	HLA-DRB1*01:01	0.163687	-2.33465	-2.49834	0.00317442	0.386926	0.26402	Yes
AGQERYHSLAPMYYRG	0.446423	YHSLAPMYY	0.026073	7.6119	HLA-DRB1*01:01	0.163687	-1.58381	-1.7475	0.0178857	0.386926	0.26402	Yes
ALEEPDDQNRI	1.1e-05	EEPDDQNRI	0.970919	7.6119	HLA-DRB1*01:01	0.163687	-0.0128172	-0.176504	0.666034	0.386926	0.26402	Yes
ALKRQGRTLY	3e-06	LKRQGRTLY	0.981879	7.6119	HLA-DRB1*01:01	0.163687	-0.00794222	-0.171629	0.673552	0.386926	0.26402	Yes
ASAFAFLAPARA	0.821079	FAFLAPARA	0.00925732	7.6119	HLA-DRB1*01:01	0.163687	-2.03351	-2.1972	0.00635037	0.386926	0.26402	Yes
ASAFAFLAPARAI	0.951021	FAFLAPARA	0.00322331	7.6119	HLA-DRB1*01:01	0.163687	-2.4917	-2.65538	0.00221114	0.386926	0.26402	Yes
DEAQFIYILGNRSK	0.934119	FIYILGNRS	0.00419851	7.6119	HLA-DRB1*01:01	0.163687	-2.3769	-2.54059	0.00288011	0.386926	0.26402	Yes
DEAQFIYILGNRSKQ	0.964123	FIYILGNRS	0.00238988	7.6119	HLA-DRB1*01:01	0.163687	-2.62162	-2.78531	0.00163942	0.386926	0.26402	Yes
DEAQFIYILGNRSKQH	0.975672	FIYILGNRS	0.00151242	7.6119	HLA-DRB1*01:01	0.163687	-2.82033	-2.98401	0.00103749	0.386926	0.26402	Yes
DEYLKTTGKPIE	0.582948	YLKTTGKPI	0.0189884	7.6119	HLA-DRB1*01:01	0.163687	-1.72151	-1.8852	0.0130258	0.386926	0.26402	Yes
DFYKILGVPRSA	0.707463	YKILGVPRS	0.0137468	7.6119	HLA-DRB1*01:01	0.163687	-1.8618	-2.02548	0.0094301	0.386926	0.26402	Yes
DFYKILGVPRSASI	0.804719	YKILGVPRS	0.00990646	7.6119	HLA-DRB1*01:01	0.163687	-2.00408	-2.16777	0.00679567	0.386926	0.26402	Yes
DFYKILGVPRSASIK	0.683494	YKILGVPRS	0.0147123	7.6119	HLA-DRB1*01:01	0.163687	-1.83232	-1.996	0.0100924	0.386926	0.26402	Yes
DGKDYIALKEDLRSW	0.680955	YIALKEDLR	0.0148063	7.6119	HLA-DRB1*01:01	0.163687	-1.82955	-1.99324	0.0101569	0.386926	0.26402	Yes
DGKDYIALKEDLRSWT	0.665947	YIALKEDLR	0.0154428	7.6119	HLA-DRB1*01:01	0.163687	-1.81127	-1.97496	0.0105935	0.386926	0.26402	Yes
EAQFIYILGNRSKQ	0.974555	FIYILGNRS	0.00160718	7.6119	HLA-DRB1*01:01	0.163687	-2.79394	-2.95762	0.0011025	0.386926	0.26402	Yes
EAQFIYILGNRSKQH	0.976668	FIYILGNRS	0.00143706	7.6119	HLA-DRB1*01:01	0.163687	-2.84252	-3.00621	0.000985799	0.386926	0.26402	Yes
EKGPMFELLPGESNKIPR	0.760935	FELLPGESN	0.0116494	7.6119	HLA-DRB1*01:01	0.163687	-1.93369	-2.09738	0.00799132	0.386926	0.26402	Yes
EKGPMFELLPGESNKIPRL	0.659345	FELLPGESN	0.0157263	7.6119	HLA-DRB1*01:01	0.163687	-1.80337	-1.96706	0.010788	0.386926	0.26402	Yes
FASFEAQGALANIA	0.551045	FEAQGALAN	0.0205434	7.6119	HLA-DRB1*01:01	0.163687	-1.68733	-1.85101	0.0140924	0.386926	0.26402	Yes
FELLPGESNKIPR	0.144554	LLPGESNKI	0.0613877	7.6119	HLA-DRB1*01:01	0.163687	-1.21192	-1.37561	0.0421109	0.386926	0.26402	Yes
FGGPGTASRPSSS	3.2e-05	GTASRPSSS	0.946271	7.6119	HLA-DRB1*01:01	0.163687	-0.0239843	-0.187671	0.649126	0.386926	0.26402	Yes
FGVLNSLANVLSQH	0.252795	LNSLANVLS	0.0423269	7.6119	HLA-DRB1*01:01	0.163687	-1.37338	-1.53707	0.0290355	0.386926	0.26402	Yes
FMLTQPHSV	5.8e-05	FMLTQPHSV	0.918662	7.6119	HLA-DRB1*01:01	0.163687	-0.0368442	-0.200531	0.630187	0.386926	0.26402	Yes
GEHSIVYLKPSYAFGSVG	0.903905	IVYLKPSYA	0.00577137	7.6119	HLA-DRB1*01:01	0.163687	-2.23872	-2.40241	0.00395906	0.386926	0.26402	Yes
GGFGGGSFRGSYGSS	0.000335	FGGGSFRGS	0.724682	7.6119	HLA-DRB1*01:01	0.163687	-0.139852	-0.303539	0.49712	0.386926	0.26402	Yes
GGYVAYSKAATVTGKL	0.698989	VAYSKAATV	0.0140565	7.6119	HLA-DRB1*01:01	0.163687	-1.85212	-2.01581	0.00964251	0.386926	0.26402	Yes
GKVKVGVNGFG	7.9e-05	VKVGVNGFG	0.897871	7.6119	HLA-DRB1*01:01	0.163687	-0.0467861	-0.210473	0.615924	0.386926	0.26402	Yes
GPMFELLPGESNKIP	0.90294	FELLPGESN	0.00581614	7.6119	HLA-DRB1*01:01	0.163687	-2.23537	-2.39905	0.00398977	0.386926	0.26402	Yes
GPRPEEYEFLTPVEEAP	0.864789	YEFLTPVEE	0.00747256	7.6119	HLA-DRB1*01:01	0.163687	-2.12653	-2.29022	0.00512605	0.386926	0.26402	Yes
GQGVHHAASQVGKEED	0.237201	VHHAASQVG	0.0443817	7.6119	HLA-DRB1*01:01	0.163687	-1.3528	-1.51648	0.0304451	0.386926	0.26402	Yes
GRDFYKILGVPRSASIK	0.828026	YKILGVPRS	0.00898797	7.6119	HLA-DRB1*01:01	0.163687	-2.04634	-2.21002	0.0061656	0.386926	0.26402	Yes
GVQLRRLSAVNSIFL	0.611035	LRRLSAVNS	0.0177327	7.6119	HLA-DRB1*01:01	0.163687	-1.75123	-1.91491	0.0121643	0.386926	0.26402	Yes
IAFPDEQAEALAVER	0.020583	DEQAEALAV	0.167952	7.6119	HLA-DRB1*01:01	0.163687	-0.774815	-0.938502	0.115212	0.386926	0.26402	Yes
IAQVFGLDSIMGNKD	0.522482	VFGLDSIMG	0.0219432	7.6119	HLA-DRB1*01:01	0.163687	-1.6587	-1.82239	0.0150526	0.386926	0.26402	Yes
IGGFYALSPYPGLR	0.937629	FYALSPYPG	0.00400303	7.6119	HLA-DRB1*01:01	0.163687	-2.39761	-2.5613	0.00274601	0.386926	0.26402	Yes
KGPMFELLPGESNKIP	0.879775	FELLPGESN	0.00683536	7.6119	HLA-DRB1*01:01	0.163687	-2.16524	-2.32892	0.00468894	0.386926	0.26402	Yes
KGPMFELLPGESNKIPRL	0.724488	FELLPGESN	0.0130656	7.6119	HLA-DRB1*01:01	0.163687	-1.88387	-2.04756	0.00896279	0.386926	0.26402	Yes
KGRLDYLSSLKVKGL	0.945232	LDYLSSLKV	0.00357549	7.6119	HLA-DRB1*01:01	0.163687	-2.44666	-2.61035	0.00245273	0.386926	0.26402	Yes
LALYKGKKERPRS	0.001634	YKGKKERPR	0.461361	7.6119	HLA-DRB1*01:01	0.163687	-0.335959	-0.499645	0.316486	0.386926	0.26402	Yes
LANIAILNNNLNTLIQ	0.094332	IAILNNNLN	0.0785309	7.6119	HLA-DRB1*01:01	0.163687	-1.10496	-1.26865	0.0538709	0.386926	0.26402	Yes
MPLEFKTLNVLHNRG	0.500711	FKTLNVLHN	0.0230661	7.6119	HLA-DRB1*01:01	0.163687	-1.63703	-1.80071	0.0158229	0.386926	0.26402	Yes
MQKEITALAPSTMK	0.751476	ITALAPSTM	0.0120367	7.6119	HLA-DRB1*01:01	0.163687	-1.91949	-2.08318	0.00825696	0.386926	0.26402	Yes
NAGEDPGLARQAPKPRKQ	0.003339	LARQAPKPR	0.357119	7.6119	HLA-DRB1*01:01	0.163687	-0.447187	-0.610873	0.244978	0.386926	0.26402	Yes
NEFSILKSPGSVVF	0.886712	FSILKSPGS	0.00651751	7.6119	HLA-DRB1*01:01	0.163687	-2.18592	-2.3496	0.0044709	0.386926	0.26402	Yes
NEFSILKSPGSVVFR	0.797701	FSILKSPGS	0.0101855	7.6119	HLA-DRB1*01:01	0.163687	-1.99202	-2.1557	0.0069871	0.386926	0.26402	Yes
NPKDVLVGADSVRAA	0.552123	LVGADSVRA	0.0204897	7.6119	HLA-DRB1*01:01	0.163687	-1.68846	-1.85215	0.0140556	0.386926	0.26402	Yes
NPKDVLVGADSVRAAIT	0.679361	LVGADSVRA	0.0148899	7.6119	HLA-DRB1*01:01	0.163687	-1.82711	-1.99079	0.0102142	0.386926	0.26402	Yes
NPKTFFILHDINSDG	0.846481	FFILHDINS	0.00824034	7.6119	HLA-DRB1*01:01	0.163687	-2.08405	-2.24774	0.00565273	0.386926	0.26402	Yes
PELAVQKVVVHPLVL	0.02533	VQKVVVHPL	0.152745	7.6119	HLA-DRB1*01:01	0.163687	-0.816032	-0.979718	0.104781	0.386926	0.26402	Yes
PYNVLAPKGASGTRED	0.249929	YNVLAPKGA	0.042688	7.6119	HLA-DRB1*01:01	0.163687	-1.36969	-1.53338	0.0292833	0.386926	0.26402	Yes
QKEITALAPSTMKI	0.813568	ITALAPSTM	0.00956249	7.6119	HLA-DRB1*01:01	0.163687	-2.01943	-2.18312	0.00655971	0.386926	0.26402	Yes
QQYLPLPTPKVIG	0.941564	YLPLPTPKV	0.00378963	7.6119	HLA-DRB1*01:01	0.163687	-2.4214	-2.58509	0.00259962	0.386926	0.26402	Yes
QQYLPLPTPKVIGID	0.888737	YLPLPTPKV	0.00642573	7.6119	HLA-DRB1*01:01	0.163687	-2.19208	-2.35576	0.00440795	0.386926	0.26402	Yes
QRKWEAARVAEQLR	0.233862	WEAARVAEQ	0.0448257	7.6119	HLA-DRB1*01:01	0.163687	-1.34847	-1.51216	0.0307497	0.386926	0.26402	Yes
SKRAFELQKSAFSEE	0.912571	FELQKSAFS	0.00533264	7.6119	HLA-DRB1*01:01	0.163687	-2.27306	-2.43674	0.0036581	0.386926	0.26402	Yes
SKRAFELQKSAFSEEV	0.923948	FELQKSAFS	0.00476856	7.6119	HLA-DRB1*01:01	0.163687	-2.32161	-2.4853	0.00327115	0.386926	0.26402	Yes
SKRAFELQKSAFSEEVN	0.860174	FELQKSAFS	0.00765462	7.6119	HLA-DRB1*01:01	0.163687	-2.11608	-2.27976	0.00525094	0.386926	0.26402	Yes
SRSGGGGGGGLGSGGSIRSSYS	0.00039	LGSGGSIRS	0.700162	7.6119	HLA-DRB1*01:01	0.163687	-0.154802	-0.318488	0.480299	0.386926	0.26402	Yes
SSSKGSLGGGF	2e-06	SKGSLGGGF	0.984173	7.6119	HLA-DRB1*01:01	0.163687	-0.00692858	-0.170615	0.675126	0.386926	0.26402	Yes
TAFQKKGAEKEEL	0.003781	FQKKGAEKE	0.34067	7.6119	HLA-DRB1*01:01	0.163687	-0.467666	-0.631353	0.233694	0.386926	0.26402	Yes
TDEAQFIYILGNRSKQH	0.960985	FIYILGNRS	0.0025973	7.6119	HLA-DRB1*01:01	0.163687	-2.58548	-2.74916	0.00178171	0.386926	0.26402	Yes
TPDPSKFFSQLSSEHGGD	0.78193	FSQLSSEHG	0.0108018	7.6119	HLA-DRB1*01:01	0.163687	-1.9665	-2.13019	0.00740987	0.386926	0.26402	Yes
TPSKQSNNKYAASSYLSLTPEQ	0.005298	YAASSYLSL	0.298932	7.6119	HLA-DRB1*01:01	0.163687	-0.524427	-0.688114	0.205063	0.386926	0.26402	Yes
VENKIVSLDPSEAGPPR	0.9377	IVSLDPSEA	0.00399855	7.6119	HLA-DRB1*01:01	0.163687	-2.3981	-2.56178	0.00274294	0.386926	0.26402	Yes
VIKMGVAAHKKSHEESHKE	0.000792	IKMGVAAHK	0.581481	7.6119	HLA-DRB1*01:01	0.163687	-0.235464	-0.399151	0.398886	0.386926	0.26402	Yes
YENEVALRQ	8e-06	YENEVALRQ	0.974166	7.6119	HLA-DRB1*01:01	0.163687	-0.0113668	-0.175053	0.668262	0.386926	0.26402	Yes
YHFLSPYVSPKE	0.049596	YHFLSPYVS	0.110313	7.6119	HLA-DRB1*01:01	0.163687	-0.957375	-1.12106	0.0756726	0.386926	0.26402	Yes
YVGDEAQSKRGILT	0.00018	YVGDEAQSK	0.813687	7.6119	HLA-DRB1*01:01	0.163687	-0.0895429	-0.253229	0.558175	0.386926	0.26402	Yes
ALASFEVEKTKK	0.006854	LASFEVEKT	0.269457	7.6119	HLA-DRB1*01:01	0.163687	-0.56951	-0.733197	0.184843	0.386926	0.26402	Yes
AVAASKERSGV	3.3e-05	VAASKERSG	0.946054	7.6119	HLA-DRB1*01:01	0.163687	-0.0240839	-0.18777	0.648977	0.386926	0.26402	Yes
DPENFRLLGNVL	0.00226	NFRLLGNVL	0.412135	7.6119	HLA-DRB1*01:01	0.163687	-0.384961	-0.548647	0.282718	0.386926	0.26402	Yes
GTGASGSFK	0	GTGASGSFK	0.993699	7.6119	HLA-DRB1*01:01	0.163687	-0.0027452	-0.166432	0.681661	0.386926	0.26402	Yes
HAVSEGTKAV	9e-06	AVSEGTKAV	0.972545	7.6119	HLA-DRB1*01:01	0.163687	-0.0120902	-0.175777	0.66715	0.386926	0.26402	Yes
KAKVAKPKKAAK	0.000723	AKVAKPKKA	0.59681	7.6119	HLA-DRB1*01:01	0.163687	-0.224164	-0.387851	0.409401	0.386926	0.26402	Yes
KIIAPPERKY	1.1e-05	IIAPPERKY	0.970781	7.6119	HLA-DRB1*01:01	0.163687	-0.0128789	-0.176565	0.665939	0.386926	0.26402	Yes
LSLMLVSTV	1e-06	LSLMLVSTV	0.986456	7.6119	HLA-DRB1*01:01	0.163687	-0.00592223	-0.169609	0.676692	0.386926	0.26402	Yes
MVGMGQKDSY	2e-06	MVGMGQKDS	0.984216	7.6119	HLA-DRB1*01:01	0.163687	-0.00690949	-0.170596	0.675156	0.386926	0.26402	Yes
NELRVAPEEHPV	0.001205	LRVAPEEHP	0.510727	7.6119	HLA-DRB1*01:01	0.163687	-0.291811	-0.455498	0.35035	0.386926	0.26402	Yes
PAKSAPAPK	0	PAKSAPAPK	0.993695	7.6119	HLA-DRB1*01:01	0.163687	-0.00274683	-0.166433	0.681658	0.386926	0.26402	Yes
SGSFKLNKKAA	7e-06	SFKLNKKAA	0.975107	7.6119	HLA-DRB1*01:01	0.163687	-0.0109476	-0.174634	0.668907	0.386926	0.26402	Yes
SLVSKGTLVQT	0.000137	LVSKGTLVQ	0.846467	7.6119	HLA-DRB1*01:01	0.163687	-0.0723898	-0.236076	0.580662	0.386926	0.26402	Yes
TPLLMQALPM	0.002841	PLLMQALPM	0.379425	7.6119	HLA-DRB1*01:01	0.163687	-0.420874	-0.584561	0.260279	0.386926	0.26402	Yes
TPRRPFEKSRL	1.9e-05	RRPFEKSRL	0.96091	7.6119	HLA-DRB1*01:01	0.163687	-0.0173173	-0.181004	0.659168	0.386926	0.26402	Yes
VSKGTLVQTK	3e-06	VSKGTLVQT	0.982294	7.6119	HLA-DRB1*01:01	0.163687	-0.00775844	-0.171445	0.673837	0.386926	0.26402	Yes
APAPAEKTPV	2e-06	PAPAEKTPV	0.984234	7.6119	HLA-DRB1*01:01	0.163687	-0.00690158	-0.170588	0.675168	0.386926	0.26402	Yes
DHVVWSLFNTL	7.3e-05	VVWSLFNTL	0.903623	7.6119	HLA-DRB1*01:01	0.163687	-0.0440128	-0.207699	0.61987	0.386926	0.26402	Yes
LEEFGRFASF	4e-06	EEFGRFASF	0.980974	7.6119	HLA-DRB1*01:01	0.163687	-0.00834239	-0.172029	0.672932	0.386926	0.26402	Yes
RYKLLGGLAVR	0.658222	YKLLGGLAV	0.015786	7.6119	HLA-DRB1*01:01	0.163687	-1.80173	-1.96541	0.0108289	0.386926	0.26402	Yes
RYKLLGGLAVRR	0.916785	YKLLGGLAV	0.0051379	7.6119	HLA-DRB1*01:01	0.163687	-2.28921	-2.4529	0.00352451	0.386926	0.26402	Yes
AAAYASQPAAYAAQA	0.986738	YASQPAAYA	0.000677493	7.6119	HLA-DRB1*01:01	0.163687	-3.1691	-3.33278	0.000464749	0.386926	0.26402	Yes
AAGQFFPEAAQVAYQ	0.973104	FFPEAAQVA	0.00172805	7.6119	HLA-DRB1*01:01	0.163687	-2.76244	-2.92613	0.00118542	0.386926	0.26402	Yes
AGKYVPAIAHLIHS	0.98542	YVPAIAHLI	0.000782698	7.6119	HLA-DRB1*01:01	0.163687	-3.10641	-3.27009	0.000536918	0.386926	0.26402	Yes
AGQFFPEAAQVAYQ	0.970488	FFPEAAQVA	0.00192876	7.6119	HLA-DRB1*01:01	0.163687	-2.71472	-2.87841	0.0013231	0.386926	0.26402	Yes
AGQFFPEAAQVAYQM	0.975979	FFPEAAQVA	0.00149004	7.6119	HLA-DRB1*01:01	0.163687	-2.8268	-2.99049	0.00102214	0.386926	0.26402	Yes
AHNNYQAQSAVPLRH	0.997153	YQAQSAVPL	3.50685e-05	7.6119	HLA-DRB1*01:01	0.163687	-4.45508	-4.61877	2.40564e-05	0.386926	0.26402	Yes
AHNNYQAQSAVPLRHE	0.998001	YQAQSAVPL	1.34305e-05	7.6119	HLA-DRB1*01:01	0.163687	-4.87191	-5.0356	9.21308e-06	0.386926	0.26402	Yes
AHNNYQAQSAVPLRHET	0.997305	YQAQSAVPL	2.76071e-05	7.6119	HLA-DRB1*01:01	0.163687	-4.55898	-4.72267	1.8938e-05	0.386926	0.26402	Yes
AKEAINVEQAFQTIA	0.798298	INVEQAFQT	0.0101557	7.6119	HLA-DRB1*01:01	0.163687	-1.99329	-2.15698	0.00696662	0.386926	0.26402	Yes
APEPSTVQILHSPAVEG	0.887179	VQILHSPAV	0.00649363	7.6119	HLA-DRB1*01:01	0.163687	-2.18751	-2.3512	0.00445452	0.386926	0.26402	Yes
APPEVVMDPALAAQYEHD	0.364316	VVMDPALAA	0.0316161	7.6119	HLA-DRB1*01:01	0.163687	-1.50009	-1.66378	0.0216881	0.386926	0.26402	Yes
AQQSFNMEQANYTIQ	0.944584	FNMEQANYT	0.00361503	7.6119	HLA-DRB1*01:01	0.163687	-2.44189	-2.60557	0.00247985	0.386926	0.26402	Yes
DAAGQFFPEAAQVAYQ	0.954367	FFPEAAQVA	0.00301589	7.6119	HLA-DRB1*01:01	0.163687	-2.52058	-2.68427	0.00206885	0.386926	0.26402	Yes
DAAGQFFPEAAQVAYQM	0.949143	FFPEAAQVA	0.00332628	7.6119	HLA-DRB1*01:01	0.163687	-2.47804	-2.64173	0.00228177	0.386926	0.26402	Yes
DAQFEVIKGQTIEV	0.994017	FEVIKGQTI	0.000167135	7.6119	HLA-DRB1*01:01	0.163687	-3.77693	-3.94062	0.000114652	0.386926	0.26402	Yes
DDVAALHGPVVRQ	0.921967	VAALHGPVV	0.00486034	7.6119	HLA-DRB1*01:01	0.163687	-2.31333	-2.47702	0.00333411	0.386926	0.26402	Yes
DLNPLIKLSGAYLVDDS	0.943778	LIKLSGAYL	0.0036695	7.6119	HLA-DRB1*01:01	0.163687	-2.43539	-2.59908	0.00251722	0.386926	0.26402	Yes
DNEIKVAKAEAAG	0.923365	IKVAKAEAA	0.00479542	7.6119	HLA-DRB1*01:01	0.163687	-2.31917	-2.48286	0.00328958	0.386926	0.26402	Yes
DPDAPLQPVTPLQLFEGR	0.193347	LQPVTPLQL	0.0510604	7.6119	HLA-DRB1*01:01	0.163687	-1.29192	-1.4556	0.0350266	0.386926	0.26402	Yes
DSGKVFTASPASIAATSFS	0.653284	FTASPASIA	0.0159778	7.6119	HLA-DRB1*01:01	0.163687	-1.79648	-1.96017	0.0109605	0.386926	0.26402	Yes
DSNTDLVPAPAVRILTPE	0.837643	LVPAPAVRI	0.00858729	7.6119	HLA-DRB1*01:01	0.163687	-2.06614	-2.22983	0.00589074	0.386926	0.26402	Yes
DTKIFYSITGPGADSPPE	0.965229	FYSITGPGA	0.00230855	7.6119	HLA-DRB1*01:01	0.163687	-2.63666	-2.80035	0.00158363	0.386926	0.26402	Yes
DTSVYSQLPGQEAFM	0.954187	YSQLPGQEA	0.00302857	7.6119	HLA-DRB1*01:01	0.163687	-2.51876	-2.68245	0.00207755	0.386926	0.26402	Yes
DTSVYSQLPGQEAFMR	0.972346	YSQLPGQEA	0.00178551	7.6119	HLA-DRB1*01:01	0.163687	-2.74824	-2.91193	0.00122483	0.386926	0.26402	Yes
DYDQYALLYSQGSKGPG	0.907114	YALLYSQGS	0.00560871	7.6119	HLA-DRB1*01:01	0.163687	-2.25114	-2.41482	0.00384748	0.386926	0.26402	Yes
DYNLIVIERGAAAAATGQPG	0.561475	IVIERGAAA	0.0200233	7.6119	HLA-DRB1*01:01	0.163687	-1.69846	-1.86215	0.0137357	0.386926	0.26402	Yes
EEVVEIDGKQVQQ	0.364725	VVEIDGKQV	0.031578	7.6119	HLA-DRB1*01:01	0.163687	-1.50062	-1.6643	0.021662	0.386926	0.26402	Yes
EKSFFLQPGEQLEQ	0.955869	FFLQPGEQL	0.0029174	7.6119	HLA-DRB1*01:01	0.163687	-2.535	-2.69869	0.00200128	0.386926	0.26402	Yes
ESAIAIATGKMLSLA	0.89454	IAIATGKML	0.00618921	7.6119	HLA-DRB1*01:01	0.163687	-2.20836	-2.37205	0.00424569	0.386926	0.26402	Yes
ESPYQELQGQRSDV	0.987842	YQELQGQRS	0.000585718	7.6119	HLA-DRB1*01:01	0.163687	-3.23231	-3.396	0.000401793	0.386926	0.26402	Yes
EVDANLMLALYNNSFY	0.001377	MLALYNNSF	0.488933	7.6119	HLA-DRB1*01:01	0.163687	-0.310751	-0.474438	0.335399	0.386926	0.26402	Yes
FEQLESQTTKQADTAT	0.115866	LESQTTKQA	0.0700227	7.6119	HLA-DRB1*01:01	0.163687	-1.15476	-1.31845	0.0480344	0.386926	0.26402	Yes
FLNSTAGTSGGAYDHSY	0.000139	STAGTSGGA	0.844941	7.6119	HLA-DRB1*01:01	0.163687	-0.0731737	-0.23686	0.579615	0.386926	0.26402	Yes
FNEVFNDVRLLLNNDN	0.005411	FNDVRLLLN	0.296444	7.6119	HLA-DRB1*01:01	0.163687	-0.528057	-0.691744	0.203356	0.386926	0.26402	Yes
FQEYSTLQAVQATM	0.965827	YSTLQAVQA	0.00226453	7.6119	HLA-DRB1*01:01	0.163687	-2.64502	-2.80871	0.00155343	0.386926	0.26402	Yes
FSGLTYLKSLYLDGNQ	0.760842	LTYLKSLYL	0.0116539	7.6119	HLA-DRB1*01:01	0.163687	-1.93353	-2.09721	0.00799439	0.386926	0.26402	Yes
FSTEFQRMKTLQVKDQ	0.982634	FQRMKTLQV	0.000990124	7.6119	HLA-DRB1*01:01	0.163687	-3.00431	-3.168	0.000679208	0.386926	0.26402	Yes
GDDDAAGQFFPEAAQVAYQ	0.788922	FFPEAAQVA	0.0105437	7.6119	HLA-DRB1*01:01	0.163687	-1.97701	-2.14069	0.00723278	0.386926	0.26402	Yes
GEKSFFLQPGEQLEQ	0.949487	FFLQPGEQL	0.00330091	7.6119	HLA-DRB1*01:01	0.163687	-2.48137	-2.64505	0.00226437	0.386926	0.26402	Yes
GFGQSVVQLQGSRVVVGAPQ	0.787089	VVQLQGSRV	0.0106041	7.6119	HLA-DRB1*01:01	0.163687	-1.97453	-2.13821	0.00727424	0.386926	0.26402	Yes
GKVFYSITGQGADT	0.989653	FYSITGQGA	0.000456636	7.6119	HLA-DRB1*01:01	0.163687	-3.34043	-3.50412	0.000313245	0.386926	0.26402	Yes
GPQLFHMDPSGTFVQ	0.24536	LFHMDPSGT	0.0432722	7.6119	HLA-DRB1*01:01	0.163687	-1.36379	-1.52748	0.029684	0.386926	0.26402	Yes
GQSVVQLQGSRVVVG	0.979596	VVQLQGSRV	0.00121844	7.6119	HLA-DRB1*01:01	0.163687	-2.9142	-3.07788	0.000835831	0.386926	0.26402	Yes
GSSPVAMQKAQQVSQG	0.976064	VAMQKAQQV	0.00148407	7.6119	HLA-DRB1*01:01	0.163687	-2.82855	-2.99223	0.00101804	0.386926	0.26402	Yes
IEDTFETLRAAVAAS	0.991319	FETLRAAVA	0.000341731	7.6119	HLA-DRB1*01:01	0.163687	-3.46632	-3.63	0.000234422	0.386926	0.26402	Yes
IEDTFETLRAAVAASG	0.995021	FETLRAAVA	0.00010819	7.6119	HLA-DRB1*01:01	0.163687	-3.96581	-4.1295	7.42165e-05	0.386926	0.26402	Yes
ILELAGNAARDN	0.014338	ILELAGNAA	0.197203	7.6119	HLA-DRB1*01:01	0.163687	-0.705086	-0.868772	0.135278	0.386926	0.26402	Yes
INDAFNLASAHKVPVT	0.982846	FNLASAHKV	0.000970725	7.6119	HLA-DRB1*01:01	0.163687	-3.0129	-3.17659	0.000665901	0.386926	0.26402	Yes
IPGYIVDDSVRVEQ	0.744659	YIVDDSVRV	0.0123008	7.6119	HLA-DRB1*01:01	0.163687	-1.91007	-2.07375	0.00843815	0.386926	0.26402	Yes
ISQTYQQQYGRSLED	0.943858	YQQQYGRSL	0.00366428	7.6119	HLA-DRB1*01:01	0.163687	-2.43601	-2.5997	0.00251363	0.386926	0.26402	Yes
KDSYVELASAKVRPQ	0.998118	YVELASAKV	1.11921e-05	7.6119	HLA-DRB1*01:01	0.163687	-4.95109	-5.11478	7.67756e-06	0.386926	0.26402	Yes
KESDTSYVSLKAPLTKPL	0.985093	YVSLKAPLT	0.000801351	7.6119	HLA-DRB1*01:01	0.163687	-3.09618	-3.25986	0.000549714	0.386926	0.26402	Yes
KYVPAIAHLIHS	0.855141	YVPAIAHLI	0.00788369	7.6119	HLA-DRB1*01:01	0.163687	-2.10327	-2.26696	0.00540808	0.386926	0.26402	Yes
LANIAVDKANLEIM	0.040348	IAVDKANLE	0.122384	7.6119	HLA-DRB1*01:01	0.163687	-0.912274	-1.07596	0.0839536	0.386926	0.26402	Yes
LDPVYFVAPAKFLGNQ	0.961222	YFVAPAKFL	0.00257865	7.6119	HLA-DRB1*01:01	0.163687	-2.58861	-2.75229	0.00176891	0.386926	0.26402	Yes
LPPQATFQVLRGNGAS	0.984393	FQVLRGNGA	0.00086925	7.6119	HLA-DRB1*01:01	0.163687	-3.06086	-3.22454	0.000596291	0.386926	0.26402	Yes
LPPQATFQVLRGNGASVG	0.990879	FQVLRGNGA	0.000377545	7.6119	HLA-DRB1*01:01	0.163687	-3.42303	-3.58672	0.00025899	0.386926	0.26402	Yes
LPSQYITGLAEHLSP	0.869109	YITGLAEHL	0.00727185	7.6119	HLA-DRB1*01:01	0.163687	-2.13835	-2.30204	0.00498837	0.386926	0.26402	Yes
LSGLVLLNAPVVAM	0.8173	LVLLNAPVV	0.00940804	7.6119	HLA-DRB1*01:01	0.163687	-2.0265	-2.19019	0.00645376	0.386926	0.26402	Yes
LSGLVLLNAPVVAMT	0.840729	LVLLNAPVV	0.00847313	7.6119	HLA-DRB1*01:01	0.163687	-2.07196	-2.23564	0.00581243	0.386926	0.26402	Yes
LSGLVLLNAPVVAMTQGPH	0.214861	LVLLNAPVV	0.0475178	7.6119	HLA-DRB1*01:01	0.163687	-1.32314	-1.48683	0.0325964	0.386926	0.26402	Yes
LTAEILELAGNAARDN	0.983261	ILELAGNAA	0.00094461	7.6119	HLA-DRB1*01:01	0.163687	-3.02475	-3.18843	0.000647986	0.386926	0.26402	Yes
MGTAYMELSSLRSEDT	0.833731	YMELSSLRS	0.00874995	7.6119	HLA-DRB1*01:01	0.163687	-2.05799	-2.22168	0.00600232	0.386926	0.26402	Yes
MGTAYMELSSLRSEDTA	0.718422	YMELSSLRS	0.0133126	7.6119	HLA-DRB1*01:01	0.163687	-1.87574	-2.03942	0.00913221	0.386926	0.26402	Yes
MNTFSVVPSPKVSDT	0.939733	FSVVPSPKV	0.00389782	7.6119	HLA-DRB1*01:01	0.163687	-2.40918	-2.57286	0.00267384	0.386926	0.26402	Yes
NEFSILKSPGSV	0.834676	FSILKSPGS	0.00870742	7.6119	HLA-DRB1*01:01	0.163687	-2.06011	-2.2238	0.00597314	0.386926	0.26402	Yes
NPANPAILSEASAPIPHDG	0.905987	ILSEASAPI	0.00566169	7.6119	HLA-DRB1*01:01	0.163687	-2.24705	-2.41074	0.00388382	0.386926	0.26402	Yes
NPNTVIILIGNKADLE	0.981996	VIILIGNKA	0.00103638	7.6119	HLA-DRB1*01:01	0.163687	-2.98448	-3.14817	0.000710942	0.386926	0.26402	Yes
NSLYLQMNSLRVEDT	0.97409	YLQMNSLRV	0.0016512	7.6119	HLA-DRB1*01:01	0.163687	-2.7822	-2.94589	0.0011327	0.386926	0.26402	Yes
NSNQFQTEVGKQLISG	0.956037	FQTEVGKQL	0.00290471	7.6119	HLA-DRB1*01:01	0.163687	-2.5369	-2.70058	0.00199258	0.386926	0.26402	Yes
NSNQFQTEVGKQLISGN	0.930703	FQTEVGKQL	0.00438356	7.6119	HLA-DRB1*01:01	0.163687	-2.35817	-2.52186	0.00300705	0.386926	0.26402	Yes
NTDPYQLMNAVNTLDR	0.986687	YQLMNAVNT	0.000680477	7.6119	HLA-DRB1*01:01	0.163687	-3.16719	-3.33087	0.000466796	0.386926	0.26402	Yes
NTLYLNMNSLRAEDT	0.90698	YLNMNSLRA	0.00561692	7.6119	HLA-DRB1*01:01	0.163687	-2.2505	-2.41419	0.00385311	0.386926	0.26402	Yes
NTLYLNMNSLRAEDTA	0.832966	YLNMNSLRA	0.00878502	7.6119	HLA-DRB1*01:01	0.163687	-2.05626	-2.21994	0.00602638	0.386926	0.26402	Yes
NTLYLQMNSLRAED	0.963471	YLQMNSLRA	0.00243539	7.6119	HLA-DRB1*01:01	0.163687	-2.61343	-2.77712	0.00167064	0.386926	0.26402	Yes
NTLYLQMNSLRAEDTA	0.928208	YLQMNSLRA	0.00454323	7.6119	HLA-DRB1*01:01	0.163687	-2.34264	-2.50632	0.00311658	0.386926	0.26402	Yes
QPSASYNAQSAPYAAQQ	0.966507	YNAQSAPYA	0.00221304	7.6119	HLA-DRB1*01:01	0.163687	-2.65501	-2.8187	0.00151811	0.386926	0.26402	Yes
RLATQALSQLHARPSY	0.12083	LSQLHARPS	0.0683745	7.6119	HLA-DRB1*01:01	0.163687	-1.16511	-1.32879	0.0469038	0.386926	0.26402	Yes
SAGPPPTGEEDTAEKDEL	0.00011	PTGEEDTAE	0.869119	7.6119	HLA-DRB1*01:01	0.163687	-0.060921	-0.224608	0.596201	0.386926	0.26402	Yes
SDTSYVSLKAPLTKPLK	0.987742	YVSLKAPLT	0.000595418	7.6119	HLA-DRB1*01:01	0.163687	-3.22518	-3.38886	0.000408446	0.386926	0.26402	Yes
SLKPSEAPELDED	0.009729	LKPSEAPEL	0.232909	7.6119	HLA-DRB1*01:01	0.163687	-0.632814	-0.7965	0.159772	0.386926	0.26402	Yes
SNQFQTEVGKQLISG	0.967585	FQTEVGKQL	0.00213395	7.6119	HLA-DRB1*01:01	0.163687	-2.67082	-2.8345	0.00146386	0.386926	0.26402	Yes
SPEYRQQSAVPLDGE	0.997356	YRQQSAVPL	2.61148e-05	7.6119	HLA-DRB1*01:01	0.163687	-4.58311	-4.7468	1.79143e-05	0.386926	0.26402	Yes
SPMYSIITPNILRLE	0.970568	YSIITPNIL	0.00192056	7.6119	HLA-DRB1*01:01	0.163687	-2.71657	-2.88026	0.00131747	0.386926	0.26402	Yes
SPNIVIALAGNKAD	0.985158	VIALAGNKA	0.000799113	7.6119	HLA-DRB1*01:01	0.163687	-3.09739	-3.26108	0.000548178	0.386926	0.26402	Yes
SPNIVIALAGNKADL	0.986375	VIALAGNKA	0.000704354	7.6119	HLA-DRB1*01:01	0.163687	-3.15221	-3.3159	0.000483175	0.386926	0.26402	Yes
SPNIVIALAGNKADLA	0.992033	VIALAGNKA	0.000290994	7.6119	HLA-DRB1*01:01	0.163687	-3.53612	-3.6998	0.000199617	0.386926	0.26402	Yes
SPNIVIALSGNKADL	0.984928	VIALSGNKA	0.000816274	7.6119	HLA-DRB1*01:01	0.163687	-3.08816	-3.25185	0.00055995	0.386926	0.26402	Yes
SPNIVIALSGNKADLA	0.991882	VIALSGNKA	0.000299947	7.6119	HLA-DRB1*01:01	0.163687	-3.52296	-3.68664	0.000205759	0.386926	0.26402	Yes
SPSIVIALAGNKADL	0.983147	VIALAGNKA	0.000952817	7.6119	HLA-DRB1*01:01	0.163687	-3.02099	-3.18468	0.000653617	0.386926	0.26402	Yes
SPSIVIALAGNKADLA	0.990306	VIALAGNKA	0.000412614	7.6119	HLA-DRB1*01:01	0.163687	-3.38446	-3.54814	0.000283046	0.386926	0.26402	Yes
SPVAMQKAQQVSQ	0.889717	VAMQKAQQV	0.00638917	7.6119	HLA-DRB1*01:01	0.163687	-2.19456	-2.35824	0.00438287	0.386926	0.26402	Yes
SPVAMQKAQQVSQG	0.941186	VAMQKAQQV	0.00380828	7.6119	HLA-DRB1*01:01	0.163687	-2.41927	-2.58296	0.00261242	0.386926	0.26402	Yes
SPYQELQGQRSD	0.946746	YQELQGQRS	0.0034867	7.6119	HLA-DRB1*01:01	0.163687	-2.45759	-2.62127	0.00239182	0.386926	0.26402	Yes
SPYQELQGQRSDV	0.962022	YQELQGQRS	0.00252418	7.6119	HLA-DRB1*01:01	0.163687	-2.59788	-2.76157	0.00173155	0.386926	0.26402	Yes
SPYQELQGQRSDVY	0.968437	YQELQGQRS	0.00207352	7.6119	HLA-DRB1*01:01	0.163687	-2.68329	-2.84698	0.0014224	0.386926	0.26402	Yes
SSHNFQLESVNKLYQDE	0.895896	FQLESVNKL	0.00613549	7.6119	HLA-DRB1*01:01	0.163687	-2.21215	-2.37584	0.00420884	0.386926	0.26402	Yes
SSPVAMQKAQQVSQ	0.964703	VAMQKAQQV	0.00235108	7.6119	HLA-DRB1*01:01	0.163687	-2.62873	-2.79242	0.0016128	0.386926	0.26402	Yes
SSPVAMQKAQQVSQG	0.980838	VAMQKAQQV	0.00113114	7.6119	HLA-DRB1*01:01	0.163687	-2.94648	-3.11017	0.000775946	0.386926	0.26402	Yes
STAYMELSSLRSED	0.828107	YMELSSLRS	0.00898275	7.6119	HLA-DRB1*01:01	0.163687	-2.04659	-2.21028	0.00616201	0.386926	0.26402	Yes
STAYMELSSLRSEDT	0.850431	YMELSSLRS	0.00808141	7.6119	HLA-DRB1*01:01	0.163687	-2.09251	-2.2562	0.00554371	0.386926	0.26402	Yes
SVFDFQKAYKLTEE	0.974006	FDFQKAYKL	0.00165941	7.6119	HLA-DRB1*01:01	0.163687	-2.78005	-2.94373	0.00113833	0.386926	0.26402	Yes
TAAAYASQPAAYAAQA	0.987662	YASQPAAYA	0.000601387	7.6119	HLA-DRB1*01:01	0.163687	-3.22085	-3.38453	0.000412541	0.386926	0.26402	Yes
TAEILELAGNAAR	0.928203	ILELAGNAA	0.00454472	7.6119	HLA-DRB1*01:01	0.163687	-2.34249	-2.50618	0.0031176	0.386926	0.26402	Yes
TAEILELAGNAARDN	0.985315	ILELAGNAA	0.000788667	7.6119	HLA-DRB1*01:01	0.163687	-3.10311	-3.26679	0.000541012	0.386926	0.26402	Yes
TDPYQLMNAVNTLDR	0.987959	YQLMNAVNT	0.00057751	7.6119	HLA-DRB1*01:01	0.163687	-3.23844	-3.40213	0.000396162	0.386926	0.26402	Yes
TEGQFVDLTGNRLTYT	0.996559	FVDLTGNRL	5.14835e-05	7.6119	HLA-DRB1*01:01	0.163687	-4.28833	-4.45202	3.53168e-05	0.386926	0.26402	Yes
TLYLQMNSLRAED	0.878582	YLQMNSLRA	0.00689207	7.6119	HLA-DRB1*01:01	0.163687	-2.16165	-2.32534	0.00472784	0.386926	0.26402	Yes
TLYLQMNSLRAEDT	0.890855	YLQMNSLRA	0.00633471	7.6119	HLA-DRB1*01:01	0.163687	-2.19827	-2.36196	0.0043455	0.386926	0.26402	Yes
TPIQIEAAYHLGPH	0.939981	IQIEAAYHL	0.00387991	7.6119	HLA-DRB1*01:01	0.163687	-2.41118	-2.57486	0.00266156	0.386926	0.26402	Yes
TPLSAFGNLRPVLAEDA	0.881927	FGNLRPVLA	0.0067421	7.6119	HLA-DRB1*01:01	0.163687	-2.17121	-2.33489	0.00462496	0.386926	0.26402	Yes
TPLSAFGNLRPVLAEDAQ	0.828431	FGNLRPVLA	0.00897006	7.6119	HLA-DRB1*01:01	0.163687	-2.0472	-2.21089	0.00615331	0.386926	0.26402	Yes
TRIYITDGNMQL	0.012699	YITDGNMQL	0.207985	7.6119	HLA-DRB1*01:01	0.163687	-0.681968	-0.845654	0.142674	0.386926	0.26402	Yes
VDTYVEMRPVSTS	0.880451	YVEMRPVST	0.00680552	7.6119	HLA-DRB1*01:01	0.163687	-2.16714	-2.33083	0.00466847	0.386926	0.26402	Yes
VEIKQLNHFWEIVVQ	0.001616	LNHFWEIVV	0.463164	7.6119	HLA-DRB1*01:01	0.163687	-0.334265	-0.497952	0.317723	0.386926	0.26402	Yes
VLEYLTAEILELAGNAAR	0.440146	ILELAGNAA	0.0264588	7.6119	HLA-DRB1*01:01	0.163687	-1.57743	-1.74112	0.0181503	0.386926	0.26402	Yes
VPNQYNPLRGSVAPGP	0.990408	YNPLRGSVA	0.000402168	7.6119	HLA-DRB1*01:01	0.163687	-3.39559	-3.55928	0.00027588	0.386926	0.26402	Yes
VPNQYNPLRGSVAPGPL	0.985952	YNPLRGSVA	0.000736437	7.6119	HLA-DRB1*01:01	0.163687	-3.13286	-3.29655	0.000505184	0.386926	0.26402	Yes
VPNQYNPLRGSVAPGPLS	0.972798	YNPLRGSVA	0.00175939	7.6119	HLA-DRB1*01:01	0.163687	-2.75464	-2.91832	0.00120691	0.386926	0.26402	Yes
VPPELVGQPAVHLKR	0.94784	LVGQPAVHL	0.00340835	7.6119	HLA-DRB1*01:01	0.163687	-2.46746	-2.63114	0.00233807	0.386926	0.26402	Yes
VPPEVTVLTNSPVE	0.707934	VTVLTNSPV	0.0137304	7.6119	HLA-DRB1*01:01	0.163687	-1.86232	-2.026	0.00941884	0.386926	0.26402	Yes
VPPEVTVLTNSPVEL	0.782925	VTVLTNSPV	0.0107593	7.6119	HLA-DRB1*01:01	0.163687	-1.96822	-2.1319	0.0073807	0.386926	0.26402	Yes
VQDYVQMKASELEQ	0.996948	YVQMKASEL	4.3276e-05	7.6119	HLA-DRB1*01:01	0.163687	-4.36375	-4.52744	2.96866e-05	0.386926	0.26402	Yes
VQDYVQMKASELEQE	0.997282	YVQMKASEL	2.83532e-05	7.6119	HLA-DRB1*01:01	0.163687	-4.5474	-4.71108	1.94498e-05	0.386926	0.26402	Yes
VRGEVAPDAKSFVLN	0.000839	VAPDAKSFV	0.571451	7.6119	HLA-DRB1*01:01	0.163687	-0.243021	-0.406708	0.392006	0.386926	0.26402	Yes
YPAQTYTAQTSQPTNYT	0.950374	YTAQTSQPT	0.00325316	7.6119	HLA-DRB1*01:01	0.163687	-2.48769	-2.65138	0.00223161	0.386926	0.26402	Yes
YPYPTDFLGPLPANPVK	0.519987	LGPLPANPV	0.0220543	7.6119	HLA-DRB1*01:01	0.163687	-1.65651	-1.82019	0.0151289	0.386926	0.26402	Yes
YVLLAYLTAQPAPTS	0.946563	LAYLTAQPA	0.00349864	7.6119	HLA-DRB1*01:01	0.163687	-2.4561	-2.61979	0.00240001	0.386926	0.26402	Yes
EPRFITVGYVDDTL	0.032064	PRFITVGYV	0.136739	7.6119	HLA-DRB1*01:01	0.163687	-0.864106	-1.02779	0.0938009	0.386926	0.26402	Yes
ADGAEAKPAE	3e-06	ADGAEAKPA	0.983351	7.6119	HLA-DRB1*01:01	0.163687	-0.00729157	-0.170978	0.674562	0.386926	0.26402	Yes
AKDVKFGADARA	0.001785	VKFGADARA	0.447682	7.6119	HLA-DRB1*01:01	0.163687	-0.349031	-0.512717	0.307102	0.386926	0.26402	Yes
AQAAAPASVPAQAPK	0.002261	AAAPASVPA	0.412027	7.6119	HLA-DRB1*01:01	0.163687	-0.385075	-0.548761	0.282643	0.386926	0.26402	Yes
FADKLNEQKL	7e-06	ADKLNEQKL	0.975142	7.6119	HLA-DRB1*01:01	0.163687	-0.0109323	-0.174619	0.668931	0.386926	0.26402	Yes
KQVHPDTGISSK	0.004818	VHPDTGISS	0.31016	7.6119	HLA-DRB1*01:01	0.163687	-0.508414	-0.6721	0.212765	0.386926	0.26402	Yes
LTPEEEEILNK	8e-06	LTPEEEEIL	0.974074	7.6119	HLA-DRB1*01:01	0.163687	-0.0114081	-0.175095	0.668198	0.386926	0.26402	Yes
PEPAKSAPAPK	3.8e-05	PEPAKSAPA	0.93967	7.6119	HLA-DRB1*01:01	0.163687	-0.0270245	-0.190711	0.644598	0.386926	0.26402	Yes
PRKIEEIKD	1e-06	PRKIEEIKD	0.986737	7.6119	HLA-DRB1*01:01	0.163687	-0.00579873	-0.169485	0.676885	0.386926	0.26402	Yes
PRKIEEIKDF	3e-06	RKIEEIKDF	0.982563	7.6119	HLA-DRB1*01:01	0.163687	-0.00763969	-0.171326	0.674022	0.386926	0.26402	Yes
PVTVTRTTITTTT	0.000449	VTRTTITTT	0.67742	7.6119	HLA-DRB1*01:01	0.163687	-0.169142	-0.332828	0.464699	0.386926	0.26402	Yes
RRTETVQKL	1e-06	RRTETVQKL	0.986715	7.6119	HLA-DRB1*01:01	0.163687	-0.00580826	-0.169495	0.67687	0.386926	0.26402	Yes
SALRPSTSRSLY	0.0212	LRPSTSRSL	0.165782	7.6119	HLA-DRB1*01:01	0.163687	-0.780463	-0.944149	0.113724	0.386926	0.26402	Yes
VASFPKKQE	0	VASFPKKQE	0.993477	7.6119	HLA-DRB1*01:01	0.163687	-0.00284239	-0.166529	0.681508	0.386926	0.26402	Yes
VDKVGESNNMV	0.000123	KVGESNNMV	0.857424	7.6119	HLA-DRB1*01:01	0.163687	-0.0668042	-0.230491	0.588179	0.386926	0.26402	Yes
VVRHQLLKT	1e-06	VVRHQLLKT	0.98673	7.6119	HLA-DRB1*01:01	0.163687	-0.00580169	-0.169488	0.67688	0.386926	0.26402	Yes
LATWTIQGAANALSG	0.905504	WTIQGAANA	0.00568706	7.6119	HLA-DRB1*01:01	0.163687	-2.24511	-2.4088	0.00390123	0.386926	0.26402	Yes
LATWTIQGAANALSGDV	0.770968	WTIQGAANA	0.0112682	7.6119	HLA-DRB1*01:01	0.163687	-1.94815	-2.11183	0.00772977	0.386926	0.26402	Yes
KLEKEEEEGISQESSEEEQ	0.000354	ISQESSEEE	0.715767	7.6119	HLA-DRB1*01:01	0.163687	-0.145228	-0.308915	0.491004	0.386926	0.26402	Yes
PDPAKSAPAPK	2.5e-05	PAKSAPAPK	0.954474	7.6119	HLA-DRB1*01:01	0.163687	-0.020236	-0.183923	0.654753	0.386926	0.26402	Yes
PEPVKSAPVPK	4.5e-05	PVKSAPVPK	0.932073	7.6119	HLA-DRB1*01:01	0.163687	-0.03055	-0.194237	0.639387	0.386926	0.26402	Yes
TAEILELAGNAARDNK	0.975898	ILELAGNAA	0.00150048	7.6119	HLA-DRB1*01:01	0.163687	-2.82377	-2.98746	0.00102931	0.386926	0.26402	Yes
APNTFYSTVQIPKV	0.037701	FYSTVQIPK	0.126599	7.6119	HLA-DRB1*01:01	0.163687	-0.897571	-1.06126	0.0868445	0.386926	0.26402	Yes
DAPNTFYSTVQIPKVV	0.037639	FYSTVQIPK	0.126702	7.6119	HLA-DRB1*01:01	0.163687	-0.897218	-1.0609	0.0869151	0.386926	0.26402	Yes
DAPNTFYSTVQIPKVVK	0.070294	FYSTVQIPK	0.0920987	7.6119	HLA-DRB1*01:01	0.163687	-1.03575	-1.19943	0.0631782	0.386926	0.26402	Yes
DLPVWEYAHKHG	0.000366	PVWEYAHKH	0.710399	7.6119	HLA-DRB1*01:01	0.163687	-0.148498	-0.312184	0.487322	0.386926	0.26402	Yes
KRFEQEINAKK	0.005379	FEQEINAKK	0.297118	7.6119	HLA-DRB1*01:01	0.163687	-0.527071	-0.690758	0.203818	0.386926	0.26402	Yes
KRLKMQYATGPL	0.00766	LKMQYATGP	0.257278	7.6119	HLA-DRB1*01:01	0.163687	-0.589598	-0.753284	0.176488	0.386926	0.26402	Yes
RRFVNVVPTFGKK	0.553545	FVNVVPTFG	0.0204255	7.6119	HLA-DRB1*01:01	0.163687	-1.68983	-1.85351	0.0140116	0.386926	0.26402	Yes
RRLDIAGRDITR	0.000215	LDIAGRDIT	0.790383	7.6119	HLA-DRB1*01:01	0.163687	-0.102162	-0.265849	0.54219	0.386926	0.26402	Yes
SRSGGGGGGGLGSGGSIRSSYSR	0.000506	LGSGGSIRS	0.657411	7.6119	HLA-DRB1*01:01	0.163687	-0.182163	-0.34585	0.450973	0.386926	0.26402	Yes
TRTHINYGVKGDVAVVR	0.01542	YGVKGDVAV	0.190983	7.6119	HLA-DRB1*01:01	0.163687	-0.719006	-0.882692	0.131011	0.386926	0.26402	Yes
DAPMFVMGVNHEKYDN	0.153146	FVMGVNHEK	0.0592731	7.6119	HLA-DRB1*01:01	0.163687	-1.22714	-1.39083	0.0406604	0.386926	0.26402	Yes
DGKDYIALNEDLRSW	0.742207	YIALNEDLR	0.012406	7.6119	HLA-DRB1*01:01	0.163687	-1.90637	-2.07005	0.00851032	0.386926	0.26402	Yes
DGKDYLALNEDLRSW	0.630789	YLALNEDLR	0.0169052	7.6119	HLA-DRB1*01:01	0.163687	-1.77198	-1.93567	0.0115967	0.386926	0.26402	Yes
EEFGRFASFEAQGAL	0.748956	FASFEAQGA	0.0121404	7.6119	HLA-DRB1*01:01	0.163687	-1.91577	-2.07945	0.00832811	0.386926	0.26402	Yes
FGRFASFEAQGAL	0.787061	FASFEAQGA	0.0106071	7.6119	HLA-DRB1*01:01	0.163687	-1.9744	-2.13809	0.00727628	0.386926	0.26402	Yes
FPTIYFSPANKKLNPK	0.131425	YFSPANKKL	0.0650445	7.6119	HLA-DRB1*01:01	0.163687	-1.18679	-1.35048	0.0446194	0.386926	0.26402	Yes
IRPEIHENYRING	0.002211	PEIHENYRI	0.415403	7.6119	HLA-DRB1*01:01	0.163687	-0.38153	-0.545217	0.284959	0.386926	0.26402	Yes
ADPSAFAAAAPAAAATT	0.941734	FAAAAPAAA	0.00378217	7.6119	HLA-DRB1*01:01	0.163687	-2.42226	-2.58595	0.0025945	0.386926	0.26402	Yes
AGNAFKKADPQEAIN	0.881352	FKKADPQEA	0.00676373	7.6119	HLA-DRB1*01:01	0.163687	-2.16981	-2.3335	0.00463981	0.386926	0.26402	Yes
AKGLFRAAVPSGAST	0.927717	FRAAVPSGA	0.00456561	7.6119	HLA-DRB1*01:01	0.163687	-2.3405	-2.50419	0.00313193	0.386926	0.26402	Yes
AKGLFRAAVPSGASTG	0.951518	FRAAVPSGA	0.00319198	7.6119	HLA-DRB1*01:01	0.163687	-2.49594	-2.65963	0.00218964	0.386926	0.26402	Yes
ALEEQLQQIRAE	0.000531	EEQLQQIRA	0.649278	7.6119	HLA-DRB1*01:01	0.163687	-0.187569	-0.351256	0.445394	0.386926	0.26402	Yes
APMYYRGAQAAIVV	0.743368	YRGAQAAIV	0.0123508	7.6119	HLA-DRB1*01:01	0.163687	-1.9083	-2.07199	0.00847245	0.386926	0.26402	Yes
APPPYSSITAESA	0.672399	YSSITAESA	0.0151697	7.6119	HLA-DRB1*01:01	0.163687	-1.81902	-1.98271	0.0104062	0.386926	0.26402	Yes
APPPYSSITAESAA	0.970948	YSSITAESA	0.0018825	7.6119	HLA-DRB1*01:01	0.163687	-2.72526	-2.88895	0.00129137	0.386926	0.26402	Yes
APPPYSSITAESAAY	0.98696	YSSITAESA	0.000654362	7.6119	HLA-DRB1*01:01	0.163687	-3.18418	-3.34787	0.000448882	0.386926	0.26402	Yes
AVRMQHLIAREAEAA	0.783595	MQHLIAREA	0.0107384	7.6119	HLA-DRB1*01:01	0.163687	-1.96906	-2.13275	0.00736637	0.386926	0.26402	Yes
AYFLYQQQGRLDK	0.218605	FLYQQQGRL	0.0469805	7.6119	HLA-DRB1*01:01	0.163687	-1.32808	-1.49177	0.0322279	0.386926	0.26402	Yes
DARSYAAAVANRAKGGG	0.992372	YAAAVANRA	0.000267117	7.6119	HLA-DRB1*01:01	0.163687	-3.5733	-3.73698	0.000183238	0.386926	0.26402	Yes
DARSYTAAVANRAKGG	0.994488	YTAAVANRA	0.000138782	7.6119	HLA-DRB1*01:01	0.163687	-3.85767	-4.02135	9.52018e-05	0.386926	0.26402	Yes
DARSYTAAVANRAKGGG	0.991244	YTAAVANRA	0.000351431	7.6119	HLA-DRB1*01:01	0.163687	-3.45416	-3.61785	0.000241076	0.386926	0.26402	Yes
DFEQEMATAASSS	0.676877	FEQEMATAA	0.0149929	7.6119	HLA-DRB1*01:01	0.163687	-1.82411	-1.9878	0.0102849	0.386926	0.26402	Yes
DFEQEMATAASSSSL	0.488577	FEQEMATAA	0.0236951	7.6119	HLA-DRB1*01:01	0.163687	-1.62534	-1.78903	0.0162544	0.386926	0.26402	Yes
DFEQEMATAASSSSLE	0.27954	FEQEMATAA	0.0392729	7.6119	HLA-DRB1*01:01	0.163687	-1.40591	-1.56959	0.0269406	0.386926	0.26402	Yes
DIDSFVPSKAAPAAA	0.98228	FVPSKAAPA	0.00101773	7.6119	HLA-DRB1*01:01	0.163687	-2.99237	-3.15605	0.000698146	0.386926	0.26402	Yes
DIDSFVPSKAAPAAAA	0.988273	FVPSKAAPA	0.000555126	7.6119	HLA-DRB1*01:01	0.163687	-3.25561	-3.41929	0.000380807	0.386926	0.26402	Yes
DPSAFAAAAPAAAAT	0.942399	FAAAAPAAA	0.00374039	7.6119	HLA-DRB1*01:01	0.163687	-2.42708	-2.59077	0.00256584	0.386926	0.26402	Yes
DPSAFAAAAPAAAATT	0.956261	FAAAAPAAA	0.00289501	7.6119	HLA-DRB1*01:01	0.163687	-2.53835	-2.70204	0.00198593	0.386926	0.26402	Yes
DSDVGEYRAVTELGRPDA	0.712251	YRAVTELGR	0.0135521	7.6119	HLA-DRB1*01:01	0.163687	-1.86799	-2.03168	0.00929651	0.386926	0.26402	Yes
DSDVGEYRAVTELGRPDAE	0.667045	YRAVTELGR	0.015404	7.6119	HLA-DRB1*01:01	0.163687	-1.81237	-1.97605	0.0105669	0.386926	0.26402	Yes
DTAAKFIGAGAATVGVA	0.905659	FIGAGAATV	0.00567587	7.6119	HLA-DRB1*01:01	0.163687	-2.24597	-2.40965	0.00389355	0.386926	0.26402	Yes
EELIYHKVTAAELQ	0.871475	YHKVTAAEL	0.00717262	7.6119	HLA-DRB1*01:01	0.163687	-2.14432	-2.30801	0.00492029	0.386926	0.26402	Yes
EFQRMKTLQVKDQ	0.799904	FQRMKTLQV	0.0100997	7.6119	HLA-DRB1*01:01	0.163687	-1.99569	-2.15938	0.00692823	0.386926	0.26402	Yes
ENPIYKSAVTTVVNPK	0.930521	YKSAVTTVV	0.00439848	7.6119	HLA-DRB1*01:01	0.163687	-2.3567	-2.52038	0.00301728	0.386926	0.26402	Yes
EVDQIYHLASPASPP	0.78989	IYHLASPAS	0.0105019	7.6119	HLA-DRB1*01:01	0.163687	-1.97873	-2.14242	0.00720411	0.386926	0.26402	Yes
EVDQIYHLASPASPPN	0.837663	IYHLASPAS	0.00858655	7.6119	HLA-DRB1*01:01	0.163687	-2.06618	-2.22987	0.00589023	0.386926	0.26402	Yes
EVKAFFESHPAPSAER	0.670021	FFESHPAPS	0.0152772	7.6119	HLA-DRB1*01:01	0.163687	-1.81596	-1.97964	0.0104799	0.386926	0.26402	Yes
FDSDVGEYRAVTELGRPDAE	0.61507	YRAVTELGR	0.0175768	7.6119	HLA-DRB1*01:01	0.163687	-1.75506	-1.91875	0.0120574	0.386926	0.26402	Yes
GPRAEEYEFLTPMEEAPK	0.688249	YEFLTPMEE	0.014484	7.6119	HLA-DRB1*01:01	0.163687	-1.83911	-2.0028	0.00993579	0.386926	0.26402	Yes
HPQTYYYAVAVVKKG	0.679667	YYYAVAVVK	0.0148757	7.6119	HLA-DRB1*01:01	0.163687	-1.82752	-1.99121	0.0102045	0.386926	0.26402	Yes
HPQTYYYAVAVVKKGTD	0.609723	YYYAVAVVK	0.0177999	7.6119	HLA-DRB1*01:01	0.163687	-1.74958	-1.91327	0.0122104	0.386926	0.26402	Yes
KGLFRAAVPSGAST	0.93204	FRAAVPSGA	0.0043164	7.6119	HLA-DRB1*01:01	0.163687	-2.36488	-2.52856	0.00296098	0.386926	0.26402	Yes
KPPSYNVATTLPSYD	0.835827	YNVATTLPS	0.00866116	7.6119	HLA-DRB1*01:01	0.163687	-2.06242	-2.22611	0.00594141	0.386926	0.26402	Yes
KTETQEKNPLPSKETIEQEKQ	0.000112	KNPLPSKET	0.866841	7.6119	HLA-DRB1*01:01	0.163687	-0.0620607	-0.225747	0.594638	0.386926	0.26402	Yes
LDFEQEMATAASSSS	0.866836	FEQEMATAA	0.0073793	7.6119	HLA-DRB1*01:01	0.163687	-2.13198	-2.29567	0.00506207	0.386926	0.26402	Yes
LGEYGFQNAILVR	0.955019	YGFQNAILV	0.00297186	7.6119	HLA-DRB1*01:01	0.163687	-2.52697	-2.69066	0.00203865	0.386926	0.26402	Yes
LPDDINVYATTAANPKE	0.227452	INVYATTAA	0.0457143	7.6119	HLA-DRB1*01:01	0.163687	-1.33995	-1.50363	0.0313593	0.386926	0.26402	Yes
QEQEYVQAVKSYKGGPG	0.29695	VQAVKSYKG	0.0374897	7.6119	HLA-DRB1*01:01	0.163687	-1.42609	-1.58977	0.0257173	0.386926	0.26402	Yes
QEYIYSIHTRLAHPS	0.391955	IYSIHTRLA	0.0295627	7.6119	HLA-DRB1*01:01	0.163687	-1.52926	-1.69294	0.0202795	0.386926	0.26402	Yes
RAGYKAAIVHNVDS	0.875996	YKAAIVHNV	0.00699205	7.6119	HLA-DRB1*01:01	0.163687	-2.1554	-2.31908	0.00479643	0.386926	0.26402	Yes
RAGYKAAIVHNVDSD	0.929851	YKAAIVHNV	0.00443355	7.6119	HLA-DRB1*01:01	0.163687	-2.35325	-2.51694	0.00304134	0.386926	0.26402	Yes
RDEELIYHKVTAAELQ	0.667173	YHKVTAAEL	0.0153958	7.6119	HLA-DRB1*01:01	0.163687	-1.8126	-1.97628	0.0105613	0.386926	0.26402	Yes
RSTTYNYVISSRLG	0.746738	YNYVISSRL	0.0122173	7.6119	HLA-DRB1*01:01	0.163687	-1.91303	-2.07671	0.00838083	0.386926	0.26402	Yes
RSYTAAVANRAKGGG	0.97985	YTAAVANRA	0.00120203	7.6119	HLA-DRB1*01:01	0.163687	-2.92009	-3.08377	0.00082457	0.386926	0.26402	Yes
SAPATGGVKKPH	1e-05	PATGGVKKP	0.972	7.6119	HLA-DRB1*01:01	0.163687	-0.0123339	-0.17602	0.666775	0.386926	0.26402	Yes
SARLSAKPAPPKPEPKPK	0.001781	LSAKPAPPK	0.448021	7.6119	HLA-DRB1*01:01	0.163687	-0.348702	-0.512388	0.307335	0.386926	0.26402	Yes
SDVGEYRAVTELGRPDAE	0.705544	YRAVTELGR	0.0138259	7.6119	HLA-DRB1*01:01	0.163687	-1.85931	-2.02299	0.00948435	0.386926	0.26402	Yes
SGQQQSNYGPMKGGSFGGR	0.173364	YGPMKGGSF	0.0548508	7.6119	HLA-DRB1*01:01	0.163687	-1.26082	-1.4245	0.0376267	0.386926	0.26402	Yes
SKVDEAVAVLQAHQAKEA	0.956819	VAVLQAHQA	0.00285994	7.6119	HLA-DRB1*01:01	0.163687	-2.54364	-2.70733	0.00196187	0.386926	0.26402	Yes
SPPHVQFTYQQPQPLSVEPR	0.713252	FTYQQPQPL	0.013517	7.6119	HLA-DRB1*01:01	0.163687	-1.86912	-2.03281	0.00927245	0.386926	0.26402	Yes
SRGEYSWAVAQGVKQ	0.93459	YSWAVAQGV	0.00416941	7.6119	HLA-DRB1*01:01	0.163687	-2.37992	-2.54361	0.00286015	0.386926	0.26402	Yes
SSSPGGAYVTRSSAVRLR	0.015389	VTRSSAVRL	0.191145	7.6119	HLA-DRB1*01:01	0.163687	-0.718638	-0.882324	0.131122	0.386926	0.26402	Yes
SSSTFEQVNQLVKE	0.018175	FEQVNQLVK	0.177484	7.6119	HLA-DRB1*01:01	0.163687	-0.75084	-0.914526	0.121751	0.386926	0.26402	Yes
TAAKFIGAGAATVG	0.856346	FIGAGAATV	0.0078322	7.6119	HLA-DRB1*01:01	0.163687	-2.10612	-2.2698	0.00537276	0.386926	0.26402	Yes
TAAKFIGAGAATVGVA	0.935195	FIGAGAATV	0.0041336	7.6119	HLA-DRB1*01:01	0.163687	-2.38367	-2.54736	0.00283558	0.386926	0.26402	Yes
TAKGLFRAAVPSGAST	0.902563	FRAAVPSGA	0.00583852	7.6119	HLA-DRB1*01:01	0.163687	-2.2337	-2.39738	0.00400513	0.386926	0.26402	Yes
TAKGLFRAAVPSGASTG	0.937621	FRAAVPSGA	0.00400452	7.6119	HLA-DRB1*01:01	0.163687	-2.39745	-2.56114	0.00274703	0.386926	0.26402	Yes
TAYFLYQQQGRLDK	0.391243	FLYQQQGRL	0.0296179	7.6119	HLA-DRB1*01:01	0.163687	-1.52845	-1.69213	0.0203174	0.386926	0.26402	Yes
TEAPLNPKANREK	0.000264	EAPLNPKAN	0.760722	7.6119	HLA-DRB1*01:01	0.163687	-0.118774	-0.282461	0.521842	0.386926	0.26402	Yes
TETQEKNPLPSKETIEQEKQAGES	0.000256	ETIEQEKQA	0.765068	7.6119	HLA-DRB1*01:01	0.163687	-0.1163	-0.279986	0.524824	0.386926	0.26402	Yes
TLPTKETIEQEKRSE	0.000253	ETIEQEKRS	0.767007	7.6119	HLA-DRB1*01:01	0.163687	-0.115201	-0.278887	0.526154	0.386926	0.26402	Yes
TLPTKETIEQEKRSEIS	0.001719	IEQEKRSEI	0.453343	7.6119	HLA-DRB1*01:01	0.163687	-0.343574	-0.50726	0.310985	0.386926	0.26402	Yes
TQEKNPLPSKETIEQEKQAGES	0.000204	ETIEQEKQA	0.797265	7.6119	HLA-DRB1*01:01	0.163687	-0.0983974	-0.262084	0.54691	0.386926	0.26402	Yes
TSSYYRGAHGIIVVY	0.844076	YRGAHGIIV	0.0083448	7.6119	HLA-DRB1*01:01	0.163687	-2.07858	-2.24227	0.00572439	0.386926	0.26402	Yes
TTYNYVISSRLGRN	0.875445	YNYVISSRL	0.00701518	7.6119	HLA-DRB1*01:01	0.163687	-2.15396	-2.31765	0.0048123	0.386926	0.26402	Yes
TVETRDGQVINETSQ	0.000835	RDGQVINET	0.572357	7.6119	HLA-DRB1*01:01	0.163687	-0.242333	-0.40602	0.392627	0.386926	0.26402	Yes
VDEAVAVLQAHQAKEAA	0.970748	VAVLQAHQA	0.00190489	7.6119	HLA-DRB1*01:01	0.163687	-2.72013	-2.88382	0.00130672	0.386926	0.26402	Yes
VDQIYHLASPASPP	0.789229	IYHLASPAS	0.0105287	7.6119	HLA-DRB1*01:01	0.163687	-1.97762	-2.14131	0.00722254	0.386926	0.26402	Yes
VDQIYHLASPASPPN	0.867898	IYHLASPAS	0.00732632	7.6119	HLA-DRB1*01:01	0.163687	-2.13511	-2.2988	0.00502573	0.386926	0.26402	Yes
VEYTRLAVESARG	0.685511	YTRLAVESA	0.0146116	7.6119	HLA-DRB1*01:01	0.163687	-1.8353	-1.99899	0.0100233	0.386926	0.26402	Yes
VPNYKLITPAVVSER	0.991883	YKLITPAVV	0.000299201	7.6119	HLA-DRB1*01:01	0.163687	-3.52404	-3.68772	0.000205247	0.386926	0.26402	Yes
DRPARHPQEQPL	6.2e-05	ARHPQEQPL	0.915204	7.6119	HLA-DRB1*01:01	0.163687	-0.0384822	-0.202169	0.627814	0.386926	0.26402	Yes
ESVGKGAVHDVK	0.001111	VGKGAVHDV	0.524325	7.6119	HLA-DRB1*01:01	0.163687	-0.2804	-0.444086	0.359678	0.386926	0.26402	Yes
ETIEQEKQAGES	0.000569	IEQEKQAGE	0.637504	7.6119	HLA-DRB1*01:01	0.163687	-0.195517	-0.359204	0.437317	0.386926	0.26402	Yes
IEQEKQAGES	2e-06	IEQEKQAGE	0.983989	7.6119	HLA-DRB1*01:01	0.163687	-0.00700959	-0.170696	0.675	0.386926	0.26402	Yes
LEKGLDGAKKAV	0.000162	EKGLDGAKK	0.826897	7.6119	HLA-DRB1*01:01	0.163687	-0.0825486	-0.246235	0.567237	0.386926	0.26402	Yes
SDNQLQEGKN	2e-06	DNQLQEGKN	0.983988	7.6119	HLA-DRB1*01:01	0.163687	-0.00701024	-0.170697	0.674999	0.386926	0.26402	Yes
TDYISKVKE	0	TDYISKVKE	0.993548	7.6119	HLA-DRB1*01:01	0.163687	-0.00281108	-0.166498	0.681557	0.386926	0.26402	Yes
AASSYLSLTPEQWKS	0.561588	YLSLTPEQW	0.0200151	7.6119	HLA-DRB1*01:01	0.163687	-1.69864	-1.86233	0.01373	0.386926	0.26402	Yes
AASSYLSLTPEQWKSHR	0.51093	YLSLTPEQW	0.0225199	7.6119	HLA-DRB1*01:01	0.163687	-1.64743	-1.81112	0.0154483	0.386926	0.26402	Yes
AASSYLSLTPEQWKSHRS	0.372717	YLSLTPEQW	0.0309677	7.6119	HLA-DRB1*01:01	0.163687	-1.50909	-1.67278	0.0212433	0.386926	0.26402	Yes
AAVAIKAMAK	2.3e-05	AVAIKAMAK	0.956299	7.6119	HLA-DRB1*01:01	0.163687	-0.0194064	-0.183093	0.656005	0.386926	0.26402	Yes
AGGHKVGLALELEA	0.007904	HKVGLALEL	0.253943	7.6119	HLA-DRB1*01:01	0.163687	-0.595263	-0.75895	0.174201	0.386926	0.26402	Yes
AKRVIISAPSADAP	0.6838	IISAPSADA	0.0146967	7.6119	HLA-DRB1*01:01	0.163687	-1.83278	-1.99647	0.0100817	0.386926	0.26402	Yes
ALMASLDAEKAQGQK	0.810063	MASLDAEKA	0.00969456	7.6119	HLA-DRB1*01:01	0.163687	-2.01347	-2.17716	0.00665031	0.386926	0.26402	Yes
ALTFSYGRALQASAL	0.686849	FSYGRALQA	0.0145564	7.6119	HLA-DRB1*01:01	0.163687	-1.83695	-2.00063	0.00998544	0.386926	0.26402	Yes
APEPSTVQILHSPAVE	0.728453	VQILHSPAV	0.0129246	7.6119	HLA-DRB1*01:01	0.163687	-1.88858	-2.05227	0.00886605	0.386926	0.26402	Yes
APEPSTVQILHSPAVEGSQV	0.778028	VQILHSPAV	0.010966	7.6119	HLA-DRB1*01:01	0.163687	-1.95995	-2.12364	0.00752248	0.386926	0.26402	Yes
APEPSTVQILHSPAVEGSQVE	0.634865	VQILHSPAV	0.0167351	7.6119	HLA-DRB1*01:01	0.163687	-1.77637	-1.94006	0.01148	0.386926	0.26402	Yes
APGLIIATGSVGKN	0.751748	LIIATGSVG	0.0120188	7.6119	HLA-DRB1*01:01	0.163687	-1.92014	-2.08383	0.00824468	0.386926	0.26402	Yes
APGLIIATGSVGKNL	0.741184	LIIATGSVG	0.0124366	7.6119	HLA-DRB1*01:01	0.163687	-1.9053	-2.06898	0.00853131	0.386926	0.26402	Yes
APGLIIATGSVGKNLA	0.613816	LIIATGSVG	0.0176297	7.6119	HLA-DRB1*01:01	0.163687	-1.75375	-1.91744	0.0120937	0.386926	0.26402	Yes
APPPYSSISAESAAYF	0.980688	YSSISAESA	0.00114159	7.6119	HLA-DRB1*01:01	0.163687	-2.94249	-3.10618	0.000783112	0.386926	0.26402	Yes
APPSYEETVAVNSYYPTPP	0.230451	YEETVAVNS	0.0453025	7.6119	HLA-DRB1*01:01	0.163687	-1.34388	-1.50756	0.0310767	0.386926	0.26402	Yes
APPSYGQLIAQGAIPPVE	0.93515	YGQLIAQGA	0.00413733	7.6119	HLA-DRB1*01:01	0.163687	-2.38328	-2.54697	0.00283814	0.386926	0.26402	Yes
APPSYGQLIAQGLIPPVE	0.947919	YGQLIAQGL	0.00340537	7.6119	HLA-DRB1*01:01	0.163687	-2.46784	-2.63152	0.00233603	0.386926	0.26402	Yes
APPVRHLIATQLLSNLE	0.791845	VRHLIATQL	0.0104138	7.6119	HLA-DRB1*01:01	0.163687	-1.98239	-2.14608	0.00714372	0.386926	0.26402	Yes
APRGDVTAEEAAGASPA	0.786582	VTAEEAAGA	0.010622	7.6119	HLA-DRB1*01:01	0.163687	-1.97379	-2.13748	0.00728652	0.386926	0.26402	Yes
ARHAWQLTQGATVLG	0.636646	WQLTQGATV	0.0166553	7.6119	HLA-DRB1*01:01	0.163687	-1.77845	-1.94213	0.0114252	0.386926	0.26402	Yes
ASFEAQGALANIA	0.455684	FEAQGALAN	0.0255194	7.6119	HLA-DRB1*01:01	0.163687	-1.59313	-1.75682	0.0175059	0.386926	0.26402	Yes
ASSYLSLTPEQWK	0.526975	YLSLTPEQW	0.0217104	7.6119	HLA-DRB1*01:01	0.163687	-1.66333	-1.82702	0.0148929	0.386926	0.26402	Yes
ASSYLSLTPEQWKS	0.611807	YLSLTPEQW	0.0177021	7.6119	HLA-DRB1*01:01	0.163687	-1.75198	-1.91566	0.0121433	0.386926	0.26402	Yes
ATGKMLSLAEQQLVD	0.463565	MLSLAEQQL	0.0250665	7.6119	HLA-DRB1*01:01	0.163687	-1.60091	-1.76459	0.0171952	0.386926	0.26402	Yes
ATWTIQGAANALSG	0.859502	WTIQGAANA	0.00769417	7.6119	HLA-DRB1*01:01	0.163687	-2.11384	-2.27752	0.00527807	0.386926	0.26402	Yes
ATWTIQGAANALSGDV	0.715711	WTIQGAANA	0.0134133	7.6119	HLA-DRB1*01:01	0.163687	-1.87246	-2.03615	0.0092013	0.386926	0.26402	Yes
AVRDMRQTVAVGVIK	0.574807	MRQTVAVGV	0.0193914	7.6119	HLA-DRB1*01:01	0.163687	-1.71239	-1.87608	0.0133021	0.386926	0.26402	Yes
DGKDYLALNEDLR	0.375677	YLALNEDLR	0.0307431	7.6119	HLA-DRB1*01:01	0.163687	-1.51225	-1.67594	0.0210892	0.386926	0.26402	Yes
DHDAFLGAEEAKTFDQ	0.184971	FLGAEEAKT	0.0525355	7.6119	HLA-DRB1*01:01	0.163687	-1.27955	-1.44323	0.0360385	0.386926	0.26402	Yes
DIYETLKSNNMK	0.866916	YETLKSNNM	0.00737557	7.6119	HLA-DRB1*01:01	0.163687	-2.1322	-2.29589	0.00505951	0.386926	0.26402	Yes
DKRDFVSAGAAAGVAA	0.974739	FVSAGAAAG	0.00159076	7.6119	HLA-DRB1*01:01	0.163687	-2.79839	-2.96208	0.00109124	0.386926	0.26402	Yes
DNEIKVAKAEAAGHR	0.98765	IKVAKAEAA	0.000604371	7.6119	HLA-DRB1*01:01	0.163687	-3.2187	-3.38238	0.000414588	0.386926	0.26402	Yes
DNEIKVAKAEAAGHRD	0.975203	IKVAKAEAA	0.00154898	7.6119	HLA-DRB1*01:01	0.163687	-2.80995	-2.97364	0.00106257	0.386926	0.26402	Yes
DNEIKVAKAEAAGHRDT	0.960792	IKVAKAEAA	0.00260626	7.6119	HLA-DRB1*01:01	0.163687	-2.58398	-2.74767	0.00178785	0.386926	0.26402	Yes
DPASFRAAIGLLARH	0.963579	FRAAIGLLA	0.00242569	7.6119	HLA-DRB1*01:01	0.163687	-2.61516	-2.77885	0.00166398	0.386926	0.26402	Yes
DPASFRAAIGLLARHLK	0.913234	FRAAIGLLA	0.00529608	7.6119	HLA-DRB1*01:01	0.163687	-2.27605	-2.43973	0.00363302	0.386926	0.26402	Yes
DPMSVLLARSLEVRH	0.454081	VLLARSLEV	0.0256194	7.6119	HLA-DRB1*01:01	0.163687	-1.59143	-1.75512	0.0175745	0.386926	0.26402	Yes
DPSGTYHAWKANAIGRG	0.873235	YHAWKANAI	0.0071092	7.6119	HLA-DRB1*01:01	0.163687	-2.14818	-2.31187	0.00487679	0.386926	0.26402	Yes
DPTWESLDARQL	0.835815	WESLDARQL	0.00866191	7.6119	HLA-DRB1*01:01	0.163687	-2.06239	-2.22607	0.00594192	0.386926	0.26402	Yes
DSRSFFWNVAPGAES	0.46822	FFWNVAPGA	0.024815	7.6119	HLA-DRB1*01:01	0.163687	-1.60529	-1.76897	0.0170227	0.386926	0.26402	Yes
DTHSSTFDAGAGIALNDH	0.591587	FDAGAGIAL	0.0185691	7.6119	HLA-DRB1*01:01	0.163687	-1.73121	-1.8949	0.0127381	0.386926	0.26402	Yes
DTHSSTFDAGAGIALNDHF	0.498521	FDAGAGIAL	0.023178	7.6119	HLA-DRB1*01:01	0.163687	-1.63492	-1.79861	0.0158997	0.386926	0.26402	Yes
DTHSSTFDAGAGIALNDHFV	0.364743	FDAGAGIAL	0.0315765	7.6119	HLA-DRB1*01:01	0.163687	-1.50064	-1.66432	0.021661	0.386926	0.26402	Yes
DTHSSTFDAGAGIALNDHFVK	0.224435	FDAGAGIAL	0.0461284	7.6119	HLA-DRB1*01:01	0.163687	-1.33603	-1.49972	0.0316433	0.386926	0.26402	Yes
DYNIQKESTLHL	0.214645	YNIQKESTL	0.0475536	7.6119	HLA-DRB1*01:01	0.163687	-1.32282	-1.4865	0.0326209	0.386926	0.26402	Yes
EEKILRYALSNSIGPV	0.501943	LRYALSNSI	0.0230019	7.6119	HLA-DRB1*01:01	0.163687	-1.63824	-1.80192	0.0157789	0.386926	0.26402	Yes
EENLFEIITADEVH	0.881948	FEIITADEV	0.00673986	7.6119	HLA-DRB1*01:01	0.163687	-2.17135	-2.33504	0.00462343	0.386926	0.26402	Yes
EEVNIKTAEAQLAYE	0.91257	IKTAEAQLA	0.00533339	7.6119	HLA-DRB1*01:01	0.163687	-2.273	-2.43668	0.00365862	0.386926	0.26402	Yes
EEVNIKTAEAQLAYELQ	0.831561	IKTAEAQLA	0.00884993	7.6119	HLA-DRB1*01:01	0.163687	-2.05306	-2.21675	0.00607091	0.386926	0.26402	Yes
EEVNIKTAEAQLAYELQG	0.721878	IKTAEAQLA	0.0131641	7.6119	HLA-DRB1*01:01	0.163687	-1.88061	-2.0443	0.00903035	0.386926	0.26402	Yes
EFGRFASFEAQGAL	0.781555	FASFEAQGA	0.010819	7.6119	HLA-DRB1*01:01	0.163687	-1.96581	-2.1295	0.00742165	0.386926	0.26402	Yes
EFGRFASFEAQGALANIAVDK	0.514291	FASFEAQGA	0.0223558	7.6119	HLA-DRB1*01:01	0.163687	-1.65061	-1.8143	0.0153357	0.386926	0.26402	Yes
EFGRFASFEAQGALANIAVDKA	0.525585	FASFEAQGA	0.0217865	7.6119	HLA-DRB1*01:01	0.163687	-1.66181	-1.8255	0.0149451	0.386926	0.26402	Yes
EIQPFRRAAAIQTMS	0.908282	FRRAAAIQT	0.00555051	7.6119	HLA-DRB1*01:01	0.163687	-2.25567	-2.41935	0.00380756	0.386926	0.26402	Yes
EPIYATIGAGVVN	0.568762	YATIGAGVV	0.0197047	7.6119	HLA-DRB1*01:01	0.163687	-1.70543	-1.86912	0.0135171	0.386926	0.26402	Yes
EPVWRSEQAIGAIA	0.969923	WRSEQAIGA	0.00196309	7.6119	HLA-DRB1*01:01	0.163687	-2.70706	-2.87075	0.00134664	0.386926	0.26402	Yes
EQVYYVGHSQGTTIG	0.597239	YYVGHSQGT	0.0183087	7.6119	HLA-DRB1*01:01	0.163687	-1.73734	-1.90103	0.0125595	0.386926	0.26402	Yes
ESAGARVVPVR	0.000235	SAGARVVPV	0.777701	7.6119	HLA-DRB1*01:01	0.163687	-0.109187	-0.272874	0.53349	0.386926	0.26402	Yes
ESSIRQLEADIMDIN	0.714207	IRQLEADIM	0.0134752	7.6119	HLA-DRB1*01:01	0.163687	-1.87046	-2.03415	0.00924379	0.386926	0.26402	Yes
ETAIRQLEADILDVN	0.920877	IRQLEADIL	0.004926	7.6119	HLA-DRB1*01:01	0.163687	-2.30751	-2.47119	0.00337915	0.386926	0.26402	Yes
ETKKFRFEEPVVLPDL	0.969703	FRFEEPVVL	0.00198249	7.6119	HLA-DRB1*01:01	0.163687	-2.70279	-2.86648	0.00135995	0.386926	0.26402	Yes
ETKKFRFEEPVVLPDLD	0.950932	FRFEEPVVL	0.0032263	7.6119	HLA-DRB1*01:01	0.163687	-2.4913	-2.65498	0.00221319	0.386926	0.26402	Yes
EVNIKTAEAQLAYELQ	0.844764	IKTAEAQLA	0.00831272	7.6119	HLA-DRB1*01:01	0.163687	-2.08026	-2.24394	0.00570238	0.386926	0.26402	Yes
FGFYRSGQAKETIP	0.615144	YRSGQAKET	0.017573	7.6119	HLA-DRB1*01:01	0.163687	-1.75515	-1.91884	0.0120548	0.386926	0.26402	Yes
FGFYRSGQAKETIPL	0.603287	YRSGQAKET	0.018064	7.6119	HLA-DRB1*01:01	0.163687	-1.74319	-1.90687	0.0123916	0.386926	0.26402	Yes
FGFYRSGQAKETIPLQE	0.340154	YRSGQAKET	0.0336105	7.6119	HLA-DRB1*01:01	0.163687	-1.47353	-1.63721	0.0230562	0.386926	0.26402	Yes
FGRFASFEAQGALA	0.866279	FASFEAQGA	0.0074084	7.6119	HLA-DRB1*01:01	0.163687	-2.13028	-2.29396	0.00508204	0.386926	0.26402	Yes
FPFLAYSGIPAVS	0.363531	FLAYSGIPA	0.0316683	7.6119	HLA-DRB1*01:01	0.163687	-1.49938	-1.66306	0.0217239	0.386926	0.26402	Yes
FPRELASLSPNLVSS	0.934737	LASLSPNLV	0.00416121	7.6119	HLA-DRB1*01:01	0.163687	-2.38078	-2.54447	0.00285452	0.386926	0.26402	Yes
FPRELASLSPNLVSSF	0.935828	LASLSPNLV	0.00410599	7.6119	HLA-DRB1*01:01	0.163687	-2.38658	-2.55027	0.00281664	0.386926	0.26402	Yes
FREKLQAANAEDIKSG	0.828463	LQAANAEDI	0.00896857	7.6119	HLA-DRB1*01:01	0.163687	-2.04728	-2.21096	0.00615229	0.386926	0.26402	Yes
FREKLQAANAEDIKSGK	0.766032	LQAANAEDI	0.0114502	7.6119	HLA-DRB1*01:01	0.163687	-1.94119	-2.10487	0.00785466	0.386926	0.26402	Yes
GALANIAVDKANLEIM	0.030356	IAVDKANLE	0.140313	7.6119	HLA-DRB1*01:01	0.163687	-0.852903	-1.01659	0.0962521	0.386926	0.26402	Yes
GALESAIAIATGKM	0.388239	LESAIAIAT	0.0298358	7.6119	HLA-DRB1*01:01	0.163687	-1.52526	-1.68895	0.0204668	0.386926	0.26402	Yes
GASILATAANLLR	0.738182	ILATAANLL	0.012559	7.6119	HLA-DRB1*01:01	0.163687	-1.90105	-2.06473	0.00861525	0.386926	0.26402	Yes
GDGTFQKWAAVVVPS	0.812164	FQKWAAVVV	0.00961771	7.6119	HLA-DRB1*01:01	0.163687	-2.01693	-2.18061	0.00659759	0.386926	0.26402	Yes
GDGTFQKWAAVVVPSG	0.840403	FQKWAAVVV	0.00848507	7.6119	HLA-DRB1*01:01	0.163687	-2.07134	-2.23503	0.00582062	0.386926	0.26402	Yes
GDGTFQKWAAVVVPSGE	0.796386	FQKWAAVVV	0.0102333	7.6119	HLA-DRB1*01:01	0.163687	-1.98999	-2.15367	0.00701985	0.386926	0.26402	Yes
GDRTFQKWAAVVVPS	0.813135	FQKWAAVVV	0.00957966	7.6119	HLA-DRB1*01:01	0.163687	-2.01865	-2.18234	0.00657148	0.386926	0.26402	Yes
GDRTFQKWAAVVVPSG	0.843933	FQKWAAVVV	0.00835077	7.6119	HLA-DRB1*01:01	0.163687	-2.07827	-2.24196	0.00572849	0.386926	0.26402	Yes
GDRTFQKWAAVVVPSGE	0.798093	FQKWAAVVV	0.0101631	7.6119	HLA-DRB1*01:01	0.163687	-1.99297	-2.15666	0.00697174	0.386926	0.26402	Yes
GDRTFQKWAAVVVPSGEE	0.735554	FQKWAAVVV	0.0126463	7.6119	HLA-DRB1*01:01	0.163687	-1.89804	-2.06172	0.00867514	0.386926	0.26402	Yes
GDRTFQKWAAVVVPSGEEQ	0.662899	FQKWAAVVV	0.0155711	7.6119	HLA-DRB1*01:01	0.163687	-1.80768	-1.97137	0.0106815	0.386926	0.26402	Yes
GDTFSCMVGHEALPL	0.96694	FSCMVGHEA	0.00218544	7.6119	HLA-DRB1*01:01	0.163687	-2.66046	-2.82415	0.00149917	0.386926	0.26402	Yes
GDWTYQTLSHLALTPS	0.310008	YQTLSHLAL	0.03621	7.6119	HLA-DRB1*01:01	0.163687	-1.44117	-1.60486	0.0248395	0.386926	0.26402	Yes
GELIGTLNAAKVPADT	0.939476	IGTLNAAKV	0.003912	7.6119	HLA-DRB1*01:01	0.163687	-2.4076	-2.57129	0.00268356	0.386926	0.26402	Yes
GETYTCVVAHEALPN	0.983217	YTCVVAHEA	0.000947594	7.6119	HLA-DRB1*01:01	0.163687	-3.02338	-3.18706	0.000650034	0.386926	0.26402	Yes
GETYTCVVAHEALPNR	0.969254	YTCVVAHEA	0.00201756	7.6119	HLA-DRB1*01:01	0.163687	-2.69517	-2.85886	0.00138401	0.386926	0.26402	Yes
GGYVAYSKAATVTG	0.590222	VAYSKAATV	0.018634	7.6119	HLA-DRB1*01:01	0.163687	-1.72969	-1.89338	0.0127826	0.386926	0.26402	Yes
GGYVAYSKAATVTGK	0.78486	VAYSKAATV	0.010678	7.6119	HLA-DRB1*01:01	0.163687	-1.97151	-2.1352	0.00732491	0.386926	0.26402	Yes
GLQEYKSLQSELDEIN	0.697685	YKSLQSELD	0.0141109	7.6119	HLA-DRB1*01:01	0.163687	-1.85044	-2.01413	0.00967987	0.386926	0.26402	Yes
GNYIMYARATSGDK	0.636465	IMYARATSG	0.0166635	7.6119	HLA-DRB1*01:01	0.163687	-1.77823	-1.94192	0.0114309	0.386926	0.26402	Yes
GPKPLFRRMSSLVGP	0.679358	FRRMSSLVG	0.0148907	7.6119	HLA-DRB1*01:01	0.163687	-1.82709	-1.99077	0.0102147	0.386926	0.26402	Yes
GPKPLFRRMSSLVGPT	0.779884	FRRMSSLVG	0.0108809	7.6119	HLA-DRB1*01:01	0.163687	-1.96333	-2.12702	0.00746413	0.386926	0.26402	Yes
GPKPLFRRMSSLVGPTQ	0.828212	FRRMSSLVG	0.00898125	7.6119	HLA-DRB1*01:01	0.163687	-2.04666	-2.21035	0.00616099	0.386926	0.26402	Yes
GPRSYTIAVASLGKGVA	0.95392	YTIAVASLG	0.00304573	7.6119	HLA-DRB1*01:01	0.163687	-2.51631	-2.67999	0.00208932	0.386926	0.26402	Yes
GPTYRGAVPWYTIN	0.655208	YRGAVPWYT	0.0158987	7.6119	HLA-DRB1*01:01	0.163687	-1.79864	-1.96233	0.0109062	0.386926	0.26402	Yes
GPTYRGAVPWYTINLD	0.499903	YRGAVPWYT	0.0231019	7.6119	HLA-DRB1*01:01	0.163687	-1.63635	-1.80004	0.0158475	0.386926	0.26402	Yes
GQEQVYYVGHSQGTTIG	0.451276	YYVGHSQGT	0.0257984	7.6119	HLA-DRB1*01:01	0.163687	-1.58841	-1.75209	0.0176973	0.386926	0.26402	Yes
GRFASFEAQGALAN	0.874977	FASFEAQGA	0.00703831	7.6119	HLA-DRB1*01:01	0.163687	-2.15253	-2.31622	0.00482816	0.386926	0.26402	Yes
GRFASFEAQGALANIA	0.820306	FASFEAQGA	0.00929239	7.6119	HLA-DRB1*01:01	0.163687	-2.03187	-2.19556	0.00637443	0.386926	0.26402	Yes
GRFASFEAQGALANIAVD	0.661955	FASFEAQGA	0.0156047	7.6119	HLA-DRB1*01:01	0.163687	-1.80674	-1.97043	0.0107046	0.386926	0.26402	Yes
GTFQKWAAVVVPS	0.687199	FQKWAAVVV	0.01454	7.6119	HLA-DRB1*01:01	0.163687	-1.83744	-2.00112	0.00997418	0.386926	0.26402	Yes
GTFQKWAAVVVPSG	0.754673	FQKWAAVVV	0.0119046	7.6119	HLA-DRB1*01:01	0.163687	-1.92428	-2.08797	0.00816637	0.386926	0.26402	Yes
GTRIIEVSGQKIKLQ	0.915016	IIEVSGQKI	0.00521774	7.6119	HLA-DRB1*01:01	0.163687	-2.28252	-2.4462	0.00357928	0.386926	0.26402	Yes
GVWVFEIGSPATTN	0.900357	WVFEIGSPA	0.00594298	7.6119	HLA-DRB1*01:01	0.163687	-2.226	-2.38968	0.00407679	0.386926	0.26402	Yes
GYSNRVVDLMAHMASKE	0.888265	VVDLMAHMA	0.00644588	7.6119	HLA-DRB1*01:01	0.163687	-2.19072	-2.3544	0.00442176	0.386926	0.26402	Yes
HLEEFGQAFSFEAQGGL	0.237936	FGQAFSFEA	0.0443012	7.6119	HLA-DRB1*01:01	0.163687	-1.35358	-1.51727	0.0303898	0.386926	0.26402	Yes
HPPELLFSASLPALG	0.20765	LLFSASLPA	0.0486571	7.6119	HLA-DRB1*01:01	0.163687	-1.31285	-1.47654	0.033378	0.386926	0.26402	Yes
HSSTFDAGAGIALNDH	0.752306	FDAGAGIAL	0.0120031	7.6119	HLA-DRB1*01:01	0.163687	-1.92071	-2.08439	0.00823393	0.386926	0.26402	Yes
HSSTFDAGAGIALNDHF	0.674874	FDAGAGIAL	0.0150772	7.6119	HLA-DRB1*01:01	0.163687	-1.82168	-1.98537	0.0103427	0.386926	0.26402	Yes
HTGSWIGLRNLDLK	0.838021	WIGLRNLDL	0.00857312	7.6119	HLA-DRB1*01:01	0.163687	-2.06686	-2.23055	0.00588101	0.386926	0.26402	Yes
IAEDYFMAKAIADRGW	0.825579	YFMAKAIAD	0.00909541	7.6119	HLA-DRB1*01:01	0.163687	-2.04118	-2.20486	0.0062393	0.386926	0.26402	Yes
IALYMASQPKNK	0.005353	LYMASQPKN	0.297687	7.6119	HLA-DRB1*01:01	0.163687	-0.52624	-0.689926	0.204208	0.386926	0.26402	Yes
IDDKGILRQITVNDLPVG	0.123248	LRQITVNDL	0.0676194	7.6119	HLA-DRB1*01:01	0.163687	-1.16993	-1.33362	0.0463858	0.386926	0.26402	Yes
IDDQYLLGDALLVHPV	0.880542	YLLGDALLV	0.00680029	7.6119	HLA-DRB1*01:01	0.163687	-2.16747	-2.33116	0.00466489	0.386926	0.26402	Yes
IDKKSMIASTAITVH	0.511381	MIASTAITV	0.0225057	7.6119	HLA-DRB1*01:01	0.163687	-1.64771	-1.81139	0.0154386	0.386926	0.26402	Yes
IDKKSMIASTAITVHY	0.633423	MIASTAITV	0.0167941	7.6119	HLA-DRB1*01:01	0.163687	-1.77484	-1.93853	0.0115204	0.386926	0.26402	Yes
IFVKTLTGKTIT	0.397611	VKTLTGKTI	0.0291919	7.6119	HLA-DRB1*01:01	0.163687	-1.53474	-1.69842	0.0200251	0.386926	0.26402	Yes
IFVKTLTGKTITL	0.365166	VKTLTGKTI	0.0315459	7.6119	HLA-DRB1*01:01	0.163687	-1.50106	-1.66474	0.02164	0.386926	0.26402	Yes
IFVKTLTGKTITLE	0.470413	VKTLTGKTI	0.0246934	7.6119	HLA-DRB1*01:01	0.163687	-1.60742	-1.77111	0.0169393	0.386926	0.26402	Yes
INHVVSVAGWGISDG	0.773651	VVSVAGWGI	0.0111615	7.6119	HLA-DRB1*01:01	0.163687	-1.95228	-2.11597	0.00765658	0.386926	0.26402	Yes
IQPFRRAAAIQTMS	0.928358	FRRAAAIQT	0.00453278	7.6119	HLA-DRB1*01:01	0.163687	-2.34363	-2.50732	0.00310941	0.386926	0.26402	Yes
IQPFRRAAAIQTMSL	0.89049	FRRAAAIQT	0.0063541	7.6119	HLA-DRB1*01:01	0.163687	-2.19695	-2.36063	0.00435881	0.386926	0.26402	Yes
IQPFRRAAAIQTMSLD	0.826442	FRRAAAIQT	0.00905363	7.6119	HLA-DRB1*01:01	0.163687	-2.04318	-2.20686	0.00621064	0.386926	0.26402	Yes
ITTFGSLKTIQIPEH	0.958527	FGSLKTIQI	0.00274056	7.6119	HLA-DRB1*01:01	0.163687	-2.56216	-2.72585	0.00187998	0.386926	0.26402	Yes
KEIKILNIFGVIK	0.181438	IKILNIFGV	0.0532272	7.6119	HLA-DRB1*01:01	0.163687	-1.27387	-1.43755	0.036513	0.386926	0.26402	Yes
KEVYFAERVTSLGKD	0.9462	YFAERVTSL	0.00351953	7.6119	HLA-DRB1*01:01	0.163687	-2.45352	-2.6172	0.00241434	0.386926	0.26402	Yes
KFVIFGATSLQNTG	0.227917	FVIFGATSL	0.0456464	7.6119	HLA-DRB1*01:01	0.163687	-1.34059	-1.50428	0.0313127	0.386926	0.26402	Yes
KGLFRAAVPSGASTG	0.957244	FRAAVPSGA	0.00282861	7.6119	HLA-DRB1*01:01	0.163687	-2.54843	-2.71211	0.00194038	0.386926	0.26402	Yes
KIEKIYIMKADTVIVG	0.925577	IYIMKADTV	0.00467679	7.6119	HLA-DRB1*01:01	0.163687	-2.33005	-2.49374	0.0032082	0.386926	0.26402	Yes
KLVSLSAQNLVD	0.862239	LVSLSAQNL	0.00757105	7.6119	HLA-DRB1*01:01	0.163687	-2.12084	-2.28453	0.00519362	0.386926	0.26402	Yes
KNMVPQQALVIR	0.532292	MVPQQALVI	0.0214455	7.6119	HLA-DRB1*01:01	0.163687	-1.66866	-1.83235	0.0147112	0.386926	0.26402	Yes
KPIWEQIGSSFIQ	0.358099	WEQIGSSFI	0.0321048	7.6119	HLA-DRB1*01:01	0.163687	-1.49343	-1.65712	0.0220233	0.386926	0.26402	Yes
KPPKPVSKMRMATPLLM	0.103044	MRMATPLLM	0.0746995	7.6119	HLA-DRB1*01:01	0.163687	-1.12668	-1.29037	0.0512426	0.386926	0.26402	Yes
KPPKPVSKMRMATPLLMQALPMG	0.49363	MRMATPLLM	0.0234242	7.6119	HLA-DRB1*01:01	0.163687	-1.63033	-1.79402	0.0160686	0.386926	0.26402	Yes
KSGVYQHVTGEMMGGH	0.94379	YQHVTGEMM	0.00366801	7.6119	HLA-DRB1*01:01	0.163687	-2.43557	-2.59926	0.00251619	0.386926	0.26402	Yes
KVDKVIQAQTAFSANPA	0.972337	IQAQTAFSA	0.00178625	7.6119	HLA-DRB1*01:01	0.163687	-2.74806	-2.91174	0.00122534	0.386926	0.26402	Yes
LAVASFPKKQE	4.5e-05	AVASFPKKQ	0.932005	7.6119	HLA-DRB1*01:01	0.163687	-0.0305816	-0.194268	0.63934	0.386926	0.26402	Yes
LDIYETLKSNNMK	0.888128	YETLKSNNM	0.00645334	7.6119	HLA-DRB1*01:01	0.163687	-2.19022	-2.3539	0.00442688	0.386926	0.26402	Yes
LKTGKLVSLSAQNLVD	0.987115	LVSLSAQNL	0.000642424	7.6119	HLA-DRB1*01:01	0.163687	-3.19218	-3.35586	0.000440692	0.386926	0.26402	Yes
LKYFHTSVSRPGRGEPR	0.534648	FHTSVSRPG	0.0213343	7.6119	HLA-DRB1*01:01	0.163687	-1.67092	-1.83461	0.014635	0.386926	0.26402	Yes
LMAHMASKE	0	LMAHMASKE	0.992733	7.6119	HLA-DRB1*01:01	0.163687	-0.00316771	-0.166854	0.680998	0.386926	0.26402	Yes
LPGHFNTFGAERLFR	0.702494	FNTFGAERL	0.0139237	7.6119	HLA-DRB1*01:01	0.163687	-1.85625	-2.01993	0.0095514	0.386926	0.26402	Yes
LPNIPVQTISRAAAEKLFG	0.410207	ISRAAAEKL	0.0283644	7.6119	HLA-DRB1*01:01	0.163687	-1.54723	-1.71091	0.0194575	0.386926	0.26402	Yes
LPNIPVQTISRAAAEKLFGN	0.562603	ISRAAAEKL	0.0199689	7.6119	HLA-DRB1*01:01	0.163687	-1.69965	-1.86333	0.0136983	0.386926	0.26402	Yes
LPTSFGSLAPAPLVFPGP	0.909835	FGSLAPAPL	0.00546695	7.6119	HLA-DRB1*01:01	0.163687	-2.26226	-2.42594	0.00375023	0.386926	0.26402	Yes
LPVFHPVTGEIIPP	0.93534	FHPVTGEII	0.00413062	7.6119	HLA-DRB1*01:01	0.163687	-2.38399	-2.54767	0.00283353	0.386926	0.26402	Yes
LPVFHPVTGEIIPPL	0.932815	FHPVTGEII	0.00426567	7.6119	HLA-DRB1*01:01	0.163687	-2.37001	-2.5337	0.00292618	0.386926	0.26402	Yes
LPVFHPVTGEIIPPLHT	0.776491	FHPVTGEII	0.0110354	7.6119	HLA-DRB1*01:01	0.163687	-1.95721	-2.1209	0.00757008	0.386926	0.26402	Yes
LRGLAKAKPEASFQ	0.054614	LAKAKPEAS	0.105074	7.6119	HLA-DRB1*01:01	0.163687	-0.978505	-1.14219	0.072079	0.386926	0.26402	Yes
LRNVVALDTEVASNR	0.800684	VVALDTEVA	0.0100714	7.6119	HLA-DRB1*01:01	0.163687	-1.99691	-2.1606	0.00690878	0.386926	0.26402	Yes
LSDYNIQKESTLH	0.634007	YNIQKESTL	0.0167672	7.6119	HLA-DRB1*01:01	0.163687	-1.77554	-1.93923	0.011502	0.386926	0.26402	Yes
LSDYNIQKESTLHL	0.649431	YNIQKESTL	0.016121	7.6119	HLA-DRB1*01:01	0.163687	-1.79261	-1.95629	0.0110588	0.386926	0.26402	Yes
MALMASLDAEKAQG	0.871141	MASLDAEKA	0.00718903	7.6119	HLA-DRB1*01:01	0.163687	-2.14333	-2.30702	0.00493156	0.386926	0.26402	Yes
MALMASLDAEKAQGQ	0.918787	MASLDAEKA	0.00503195	7.6119	HLA-DRB1*01:01	0.163687	-2.29826	-2.46195	0.00345183	0.386926	0.26402	Yes
MALMASLDAEKAQGQK	0.87676	MASLDAEKA	0.00696221	7.6119	HLA-DRB1*01:01	0.163687	-2.15725	-2.32094	0.00477596	0.386926	0.26402	Yes
MASLDAEKAQGQK	0.043698	LDAEKAQGQ	0.117641	7.6119	HLA-DRB1*01:01	0.163687	-0.92944	-1.09313	0.0806999	0.386926	0.26402	Yes
NAKYAISMARKIG	0.869251	YAISMARKI	0.00726738	7.6119	HLA-DRB1*01:01	0.163687	-2.13862	-2.30231	0.0049853	0.386926	0.26402	Yes
NAKYAISMARKIGAR	0.963308	YAISMARKI	0.00244584	7.6119	HLA-DRB1*01:01	0.163687	-2.61157	-2.77526	0.0016778	0.386926	0.26402	Yes
NIRYMSGGTATGDA	0.534773	IRYMSGGTA	0.0213313	7.6119	HLA-DRB1*01:01	0.163687	-1.67098	-1.83467	0.0146329	0.386926	0.26402	Yes
NLQDESFTRGSDSLIKGKK	0.049156	FTRGSDSLI	0.11078	7.6119	HLA-DRB1*01:01	0.163687	-0.955537	-1.11922	0.0759936	0.386926	0.26402	Yes
NPGGYVAYSKAATVTGKLV	0.451147	VAYSKAATV	0.0258074	7.6119	HLA-DRB1*01:01	0.163687	-1.58826	-1.75194	0.0177034	0.386926	0.26402	Yes
NPGGYVAYSKAATVTGKLVH	0.325129	VAYSKAATV	0.034864	7.6119	HLA-DRB1*01:01	0.163687	-1.45762	-1.62131	0.0239161	0.386926	0.26402	Yes
NPKDVLVGADSVRAAITF	0.55028	LVGADSVRA	0.0205844	7.6119	HLA-DRB1*01:01	0.163687	-1.68646	-1.85015	0.0141206	0.386926	0.26402	Yes
PFAAAGALQGWSL	0.141629	FAAAGALQG	0.0621622	7.6119	HLA-DRB1*01:01	0.163687	-1.20647	-1.37016	0.0426422	0.386926	0.26402	Yes
PGGYVAYSKAATVTGK	0.752006	VAYSKAATV	0.0120121	7.6119	HLA-DRB1*01:01	0.163687	-1.92038	-2.08407	0.00824007	0.386926	0.26402	Yes
PGGYVAYSKAATVTGKL	0.653437	VAYSKAATV	0.0159711	7.6119	HLA-DRB1*01:01	0.163687	-1.79667	-1.96035	0.0109559	0.386926	0.26402	Yes
PPKPVSKMRMATPLLMQA	0.602709	MRMATPLLM	0.0180908	7.6119	HLA-DRB1*01:01	0.163687	-1.74254	-1.90623	0.01241	0.386926	0.26402	Yes
QEQVYYVGHSQGTTIG	0.537869	YYVGHSQGT	0.0211769	7.6119	HLA-DRB1*01:01	0.163687	-1.67414	-1.83782	0.014527	0.386926	0.26402	Yes
QGGQFLRAVAQRCPSPPM	0.946556	FLRAVAQRC	0.00350013	7.6119	HLA-DRB1*01:01	0.163687	-2.45592	-2.6196	0.00240103	0.386926	0.26402	Yes
QPPHEYVPWVTVNGKPL	0.269246	YVPWVTVNG	0.0403966	7.6119	HLA-DRB1*01:01	0.163687	-1.39366	-1.55734	0.0277114	0.386926	0.26402	Yes
QPPHEYVPWVTVNGKPLE	0.412722	WVTVNGKPL	0.028198	7.6119	HLA-DRB1*01:01	0.163687	-1.54978	-1.71347	0.0193434	0.386926	0.26402	Yes
REKLQAANAEDIKSG	0.875313	LQAANAEDI	0.00702041	7.6119	HLA-DRB1*01:01	0.163687	-2.15364	-2.31732	0.00481588	0.386926	0.26402	Yes
RETAIRQLEADILDVN	0.902051	IRQLEADIL	0.00586986	7.6119	HLA-DRB1*01:01	0.163687	-2.23137	-2.39506	0.00402663	0.386926	0.26402	Yes
RFASFEAQGALANIA	0.632482	FEAQGALAN	0.0168314	7.6119	HLA-DRB1*01:01	0.163687	-1.77388	-1.93757	0.011546	0.386926	0.26402	Yes
RNFERNKAIKVIIA	0.818614	FERNKAIKV	0.00935955	7.6119	HLA-DRB1*01:01	0.163687	-2.02875	-2.19243	0.00642049	0.386926	0.26402	Yes
RPAGDGTFQKWAAVVVPSG	0.694031	FQKWAAVVV	0.0142482	7.6119	HLA-DRB1*01:01	0.163687	-1.84624	-2.00993	0.00977405	0.386926	0.26402	Yes
RPAGDGTFQKWAAVVVPSGQ	0.613238	FQKWAAVVV	0.0176499	7.6119	HLA-DRB1*01:01	0.163687	-1.75326	-1.91694	0.0121075	0.386926	0.26402	Yes
RPAGDGTFQKWAAVVVPSGQE	0.509895	FQKWAAVVV	0.0225736	7.6119	HLA-DRB1*01:01	0.163687	-1.6464	-1.81009	0.0154851	0.386926	0.26402	Yes
RPAGDRTFQKWAAVVVPSGE	0.607362	FQKWAAVVV	0.0178954	7.6119	HLA-DRB1*01:01	0.163687	-1.74726	-1.91095	0.0122759	0.386926	0.26402	Yes
RPAGDRTFQKWAAVVVPSGEEQ	0.53802	FQKWAAVVV	0.0211694	7.6119	HLA-DRB1*01:01	0.163687	-1.67429	-1.83798	0.0145219	0.386926	0.26402	Yes
RSYYRGAAGALLVYD	0.899138	YRGAAGALL	0.00600193	7.6119	HLA-DRB1*01:01	0.163687	-2.22171	-2.3854	0.00411722	0.386926	0.26402	Yes
RTFHRAASSAAQGAF	0.779377	FHRAASSAA	0.0109078	7.6119	HLA-DRB1*01:01	0.163687	-1.96226	-2.12595	0.00748255	0.386926	0.26402	Yes
RTFHRAASSAAQGAFQ	0.683036	FHRAASSAA	0.0147273	7.6119	HLA-DRB1*01:01	0.163687	-1.83188	-1.99556	0.0101027	0.386926	0.26402	Yes
SALGAAYGTAKSGTG	0.004104	YGTAKSGTG	0.329952	7.6119	HLA-DRB1*01:01	0.163687	-0.48155	-0.645236	0.226341	0.386926	0.26402	Yes
SDTHSSTFDAGAGIALNDH	0.487355	FDAGAGIAL	0.0237734	7.6119	HLA-DRB1*01:01	0.163687	-1.62391	-1.78759	0.0163082	0.386926	0.26402	Yes
SDTHSSTFDAGAGIALNDHFVK	0.266307	FDAGAGIAL	0.0407339	7.6119	HLA-DRB1*01:01	0.163687	-1.39004	-1.55373	0.0279427	0.386926	0.26402	Yes
SDYNIQKESTLH	0.567261	YNIQKESTL	0.0197756	7.6119	HLA-DRB1*01:01	0.163687	-1.70387	-1.86756	0.0135657	0.386926	0.26402	Yes
SDYNIQKESTLHL	0.574679	YNIQKESTL	0.0194011	7.6119	HLA-DRB1*01:01	0.163687	-1.71217	-1.87586	0.0133088	0.386926	0.26402	Yes
SDYNIQKESTLHLV	0.599951	YNIQKESTL	0.018199	7.6119	HLA-DRB1*01:01	0.163687	-1.73995	-1.90364	0.0124842	0.386926	0.26402	Yes
SEVILPVPAFNVIN	0.846535	ILPVPAFNV	0.00823661	7.6119	HLA-DRB1*01:01	0.163687	-2.08425	-2.24794	0.00565018	0.386926	0.26402	Yes
SLRGLAKAKPEASFQ	0.064009	LAKAKPEAS	0.0967098	7.6119	HLA-DRB1*01:01	0.163687	-1.01453	-1.17822	0.0663413	0.386926	0.26402	Yes
SPGESEHLLEPAEAERSQ	0.025525	EHLLEPAEA	0.152179	7.6119	HLA-DRB1*01:01	0.163687	-0.817645	-0.981331	0.104392	0.386926	0.26402	Yes
SPRRKLISVDSRSVS	0.312531	LISVDSRSV	0.0359802	7.6119	HLA-DRB1*01:01	0.163687	-1.44394	-1.60762	0.0246818	0.386926	0.26402	Yes
SPTAYGVIAAAAVL	0.693533	YGVIAAAAV	0.0142669	7.6119	HLA-DRB1*01:01	0.163687	-1.84567	-2.00936	0.00978685	0.386926	0.26402	Yes
SPTAYGVIAAAAVLSA	0.902801	YGVIAAAAV	0.00582659	7.6119	HLA-DRB1*01:01	0.163687	-2.23459	-2.39827	0.00399694	0.386926	0.26402	Yes
SPTAYGVIAAAAVLSAS	0.816806	YGVIAAAAV	0.00942371	7.6119	HLA-DRB1*01:01	0.163687	-2.02578	-2.18946	0.00646451	0.386926	0.26402	Yes
SPTLPTSFGSLAPAPLVFPGP	0.717617	FGSLAPAPL	0.0133447	7.6119	HLA-DRB1*01:01	0.163687	-1.87469	-2.03838	0.00915422	0.386926	0.26402	Yes
SQLIMQAEAEAASVR	0.73054	IMQAEAEAA	0.0128462	7.6119	HLA-DRB1*01:01	0.163687	-1.89122	-2.05491	0.00881231	0.386926	0.26402	Yes
SRGLTSARAAEILAR	0.82996	LTSARAAEI	0.00891783	7.6119	HLA-DRB1*01:01	0.163687	-2.04974	-2.21343	0.00611748	0.386926	0.26402	Yes
SSEYHYVGGFYGG	0.5824	YHYVGGFYG	0.0190123	7.6119	HLA-DRB1*01:01	0.163687	-1.72096	-1.88465	0.0130421	0.386926	0.26402	Yes
SSGLYSLSSVVTVPS	0.715724	LYSLSSVVT	0.0134126	7.6119	HLA-DRB1*01:01	0.163687	-1.87249	-2.03617	0.00920079	0.386926	0.26402	Yes
SSRTFHRAASSAAQGAF	0.899414	FHRAASSAA	0.00599148	7.6119	HLA-DRB1*01:01	0.163687	-2.22247	-2.38615	0.00411006	0.386926	0.26402	Yes
SSTFDAGAGIALNDH	0.798059	FDAGAGIAL	0.0101661	7.6119	HLA-DRB1*01:01	0.163687	-1.99284	-2.15653	0.00697379	0.386926	0.26402	Yes
SSYYRGAHGIIVVYD	0.930673	YRGAHGIIV	0.00438579	7.6119	HLA-DRB1*01:01	0.163687	-2.35795	-2.52164	0.00300858	0.386926	0.26402	Yes
SVENKIVSLDPSEAGPPR	0.90355	IVSLDPSEA	0.00579152	7.6119	HLA-DRB1*01:01	0.163687	-2.23721	-2.40089	0.00397288	0.386926	0.26402	Yes
TAALTAVRPSRVA	0.358044	LTAVRPSRV	0.032113	7.6119	HLA-DRB1*01:01	0.163687	-1.49332	-1.65701	0.022029	0.386926	0.26402	Yes
TGALESAIAIATGKM	0.647317	LESAIAIAT	0.0162054	7.6119	HLA-DRB1*01:01	0.163687	-1.79034	-1.95403	0.0111166	0.386926	0.26402	Yes
TGETYTCVVAHEALP	0.969653	YTCVVAHEA	0.00198473	7.6119	HLA-DRB1*01:01	0.163687	-2.7023	-2.86599	0.00136149	0.386926	0.26402	Yes
TGETYTCVVAHEALPN	0.978568	YTCVVAHEA	0.00129977	7.6119	HLA-DRB1*01:01	0.163687	-2.88613	-3.04982	0.000891621	0.386926	0.26402	Yes
TGETYTCVVAHEALPNR	0.964321	YTCVVAHEA	0.00237719	7.6119	HLA-DRB1*01:01	0.163687	-2.62394	-2.78762	0.00163071	0.386926	0.26402	Yes
TGETYTCVVAHEALPNRV	0.928537	YTCVVAHEA	0.00452085	7.6119	HLA-DRB1*01:01	0.163687	-2.34478	-2.50847	0.00310122	0.386926	0.26402	Yes
TGKLVSLSAQNL	0.89822	LVSLSAQNL	0.00604297	7.6119	HLA-DRB1*01:01	0.163687	-2.21875	-2.38244	0.00414537	0.386926	0.26402	Yes
TGKMLSLAEQQLVD	0.495314	MLSLAEQQL	0.023328	7.6119	HLA-DRB1*01:01	0.163687	-1.63212	-1.79581	0.0160026	0.386926	0.26402	Yes
THSSTFDAGAGIALNDH	0.700429	FDAGAGIAL	0.0140028	7.6119	HLA-DRB1*01:01	0.163687	-1.85379	-2.01747	0.00960566	0.386926	0.26402	Yes
TLSDYNIQKESTLH	0.608813	YNIQKESTL	0.0178304	7.6119	HLA-DRB1*01:01	0.163687	-1.74884	-1.91252	0.0122314	0.386926	0.26402	Yes
TLSDYNIQKESTLHL	0.624615	YNIQKESTL	0.0171492	7.6119	HLA-DRB1*01:01	0.163687	-1.76576	-1.92944	0.0117641	0.386926	0.26402	Yes
TLTISSLQAEDVAV	0.815196	ISSLQAEDV	0.00948937	7.6119	HLA-DRB1*01:01	0.163687	-2.02276	-2.18645	0.00650955	0.386926	0.26402	Yes
TPEEIAMATVTALRR	0.483514	IAMATVTAL	0.0239868	7.6119	HLA-DRB1*01:01	0.163687	-1.62003	-1.78371	0.0164546	0.386926	0.26402	Yes
TPIIATLASGAVAA	0.677457	IATLASGAV	0.0149757	7.6119	HLA-DRB1*01:01	0.163687	-1.82461	-1.9883	0.0102731	0.386926	0.26402	Yes
TPIIATLASGAVAAV	0.6797	IATLASGAV	0.014875	7.6119	HLA-DRB1*01:01	0.163687	-1.82754	-1.99123	0.010204	0.386926	0.26402	Yes
TPLLRPLASVSAQSFG	0.726528	LRPLASVSA	0.0129977	7.6119	HLA-DRB1*01:01	0.163687	-1.88613	-2.04982	0.00891621	0.386926	0.26402	Yes
TPSKQSNNKYAASSYLSLTPE	0.004412	YAASSYLSL	0.320808	7.6119	HLA-DRB1*01:01	0.163687	-0.493755	-0.657442	0.220069	0.386926	0.26402	Yes
TSKGLFRAAVPSGASTG	0.937621	FRAAVPSGA	0.00400377	7.6119	HLA-DRB1*01:01	0.163687	-2.39753	-2.56122	0.00274652	0.386926	0.26402	Yes
TTGALESAIAIATGKM	0.597633	LESAIAIAT	0.0182968	7.6119	HLA-DRB1*01:01	0.163687	-1.73763	-1.90131	0.0125513	0.386926	0.26402	Yes
TTPSYVAFTDTERLIG	0.448361	YVAFTDTER	0.0259656	7.6119	HLA-DRB1*01:01	0.163687	-1.5856	-1.74929	0.0178119	0.386926	0.26402	Yes
VDDRFETLEPEVSHE	0.845956	FETLEPEVS	0.00826571	7.6119	HLA-DRB1*01:01	0.163687	-2.08272	-2.24641	0.00567014	0.386926	0.26402	Yes
[truncated: 84,296 more rows]
