# Supplementary material for: Evaluating NetMHCpan performance on non-European HLA alleles not present in training data
Source: Front Immunol. 2024 Jan 16;14:1288105. doi: 10.3389/fimmu.2023.1288105 (PMC10825027; doi:10.3389/fimmu.2023.1288105)
Supplement: Supplementary Data Sheet 5 — Raw data for Figure 5. [file DataSheet_5.xlsx]

## Sheet: A3401
pos	A	C	D	E	F	G	H	I	K	L	M	N	P	Q	R	S	T	V	W	Y
25	0	0	0	0	0		0	0	0	0	0	0	0	0	0	0	0	0	0	0
26	0	0	0	0	0	0	0	0	0	0	0	0	0	0	0		0	0	0	0
27	0	0	0	0	0	0		0	0	0	0	0	0	0	0	0	0	0	0	0
28	0	0	0	0	0	0	0	0	0	0	0	0	0	0	0		0	0	0	0
29	0	0	0	0	0	0	0	0	0	0		0	0	0	0	0	0	0	0	0
30	0	0	0	0	0	0	0	0	0	0	0	0	0	0		0	0	0	0	0
31	-0.0972817	-0.0948706	-0.109984	-0.0981461	-0.000503298	-0.0932309	-0.0490725	-0.0660294	-0.0958617	-0.0580859	-0.0640497	-0.102602	-0.100416	-0.0916849	-0.0748593	-0.102214	-0.0975762	-0.0733888	-0.000326558
32	0	0	0	0		0	0	0	0	0	0	0	0	0	0	0	0	0	0	0
33	0.0698618	0.145469	0.215435	0.124921	0.163698	0.118888	0.123516	0.126462	0.0822131	0.119035	0.038705	0.130604	0.129036	0.0605696	0.0652519	0.098183	0.0805629	0.108059	0.0376817
34	0	0	0	0	0	0	0	0	0	0	0	0	0	0	0	0		0	0	0
35	0	0	0	0	0	0	0	0	0	0	0	0	0	0	0		0	0	0	0
36	0	0	0	0	0	0	0	0	0	0	0	0	0	0	0	0	0		0	0
37	0	0	0	0	0	0	0	0	0	0	0	0	0	0	0		0	0	0	0
38	0	0	0	0	0	0	0	0	0	0	0	0	0	0		0	0	0	0	0
39	0	0	0	0	0	0	0	0	0	0	0	0		0	0	0	0	0	0	0
40	0	0	0	0	0		0	0	0	0	0	0	0	0	0	0	0	0	0	0
41	0	0	0	0	0	0	0	0	0	0	0	0	0	0		0	0	0	0	0
42	0	0	0	0	0		0	0	0	0	0	0	0	0	0	0	0	0	0	0
43	0	0	0		0	0	0	0	0	0	0	0	0	0	0	0	0	0	0	0
44	0	0	0	0	0	0	0	0	0	0	0	0		0	0	0	0	0	0	0
45	0	0	0	0	0	0	0	0	0	0	0	0	0	0		0	0	0	0	0
46	0	0	0	0		0	0	0	0	0	0	0	0	0	0	0	0	0	0	0
47	0	0	0	0	0	0	0		0	0	0	0	0	0	0	0	0	0	0	0
48		0.018509	0.0337257	-0.0116005	0.0156293	0.0251553	-0.00152742	0.0522413	-0.0073856	0.0185489	-0.00511239	0.0275889	-0.0205615	-0.0190812	-0.00879146	0.0381667	0.00651351	0.0413879	-0.0167936	-0.0144669
49	0	0	0	0	0	0	0	0	0	0	0	0	0	0	0	0	0		0	0
50	0	0	0	0	0		0	0	0	0	0	0	0	0	0	0	0	0	0	0
51	0	0	0	0	0	0	0	0	0	0	0	0	0	0	0	0	0	0	0
52	0	0	0	0	0	0	0	0	0	0	0	0	0	0	0	0	0		0	0
53	0	0		0	0	0	0	0	0	0	0	0	0	0	0	0	0	0	0	0
54	0	0		0	0	0	0	0	0	0	0	0	0	0	0	0	0	0	0	0
55	0	0	0	0	0	0	0	0	0	0	0	0	0	0	0	0		0	0	0
56	0	0	0	0	0	0	0	0	0	0	0	0	0		0	0	0	0	0	0
57	0	0	0	0		0	0	0	0	0	0	0	0	0	0	0	0	0	0	0
58	0	0	0	0	0	0	0	0	0	0	0	0	0	0	0	0	0		0	0
59	0	0	0	0	0	0	0	0	0	0	0	0	0	0		0	0	0	0	0
60	0	0	0	0		0	0	0	0	0	0	0	0	0	0	0	0	0	0	0
61	0	0		0	0	0	0	0	0	0	0	0	0	0	0	0	0	0	0	0
62	0	0	0	0	0	0	0	0	0	0	0	0	0	0	0		0	0	0	0
63	0	0		0	0	0	0	0	0	0	0	0	0	0	0	0	0	0	0	0
64		0	0	0	0	0	0	0	0	0	0	0	0	0	0	0	0	0	0	0
65		0	0	0	0	0	0	0	0	0	0	0	0	0	0	0	0	0	0	0
66	0	0	0	0	0	0	0	0	0	0	0	0	0	0	0		0	0	0	0
67	0	0	0	0	0	0	0	0	0	0	0	0	0		0	0	0	0	0	0
68	0	0	0	0	0	0	0	0	0	0	0	0	0	0		0	0	0	0	0
69	0.0889143	0.0508011	0.281481	0.222909	0.0772866	0.258253	0.195498	0.00134484	0.190871	0.000201089		0.192559	0.168971	0.163787	0.180394	0.12979	0.0436099	-0.00693701	0.144063	0.110583
70	0	0	0		0	0	0	0	0	0	0	0	0	0	0	0	0	0	0	0
71	0	0	0	0	0	0	0	0	0	0	0	0		0	0	0	0	0	0	0
72	0	0	0	0	0	0	0	0	0	0	0	0	0	0		0	0	0	0	0
73		0	0	0	0	0	0	0	0	0	0	0	0	0	0	0	0	0	0	0
74	0	0	0	0	0	0	0	0	0	0	0	0		0	0	0	0	0	0	0
75	0	0	0	0	0	0	0	0	0	0	0	0	0	0	0	0	0	0		0
76	0	0	0	0	0	0	0		0	0	0	0	0	0	0	0	0	0	0	0
77	0	0	0		0	0	0	0	0	0	0	0	0	0	0	0	0	0	0	0
78	0	0	0	0	0	0	0	0	0	0	0	0	0		0	0	0	0	0	0
79	0	0	0		0	0	0	0	0	0	0	0	0	0	0	0	0	0	0	0
80	0	0	0	0	0		0	0	0	0	0	0	0	0	0	0	0	0	0	0
81	0	0	0	0	0	0	0	0	0	0	0	0		0	0	0	0	0	0	0
82	0	0	0		0	0	0	0	0	0	0	0	0	0	0	0	0	0	0	0
83	-0.087768	-0.0853998	-0.0891495	-0.0801122	0.00208252	-0.0843424	-0.0315238	-0.0558859	-0.0841807	-0.0486507	-0.0539948	-0.0837167	-0.0862649	-0.07727	-0.0697153	-0.0920229	-0.0885274	-0.0641989	-0.000614634
84	0	0	0	0	0	0	0	0	0	0	0	0	0	0	0	0	0	0		0
85	0	0		0	0	0	0	0	0	0	0	0	0	0	0	0	0	0	0	0
86	0.0166292	0.0793567	-0.0426822	-0.0217191	0.209649	-0.026025	-0.0321476	0.243771	-0.0269404	0.239261	0.185791	-0.0614517	0.0664062	-0.0081694		-0.0232781	0.0402457	0.211617	0.0899697	0.0914174
87	0.04483	0.00637049	0.101772	0.296063	0.152799	-0.0188911	0.130334	0.125407	0.218958	0.177095	0.167041		0.145308	0.289407	0.234198	0.0178708	0.0403368	0.112469	0.25948	0.152379
88	0	0	0	0	0	0	0	0	0	0	0	0	0	0	0	0		0	0	0
89	0	0	0	0	0	0	0	0	0	0	0	0	0	0		0	0	0	0	0
90	0.0346603	0.0609533	-0.0426032	-0.0332476	0.122105	-0.0293369	-0.0656513	0.196536		0.163825	0.117754	-0.046234	0.0220341	-0.0234017	0.00385132	-0.00572506	0.0397632	0.176844	0.0687071	0.0329292
91	0.00785871	0.132267	0.119697	0.0499904	0.032334	0.0271115	0.07198	0.00802189	0.0799474	-0.0114792	0.014622	0.104279	0.033992	0.0983779	0.0566467	0.0905485	0.037833		0.0591239	0.0875768
92	0	0	0	0	0	0	0	0		0	0	0	0	0	0	0	0	0	0	0
93		-0.00956433	-0.00244132	0.0282004	0.0169094	0.0397619	0.0513653	0.0100065	0.0964406	0.0155181	0.0140027	0.00267822	-0.018068	0.0531954	0.157577	0.00329121	0.00817472	0.0158937	0.0353299	0.0253156
94	0.0486337	0.091427	0.155119	0.0625586	0.0602737	0.0896673	0.0538825	0.0422335	-0.0092105	0.0221466	-0.00663729	0.116464	0.0484286		-0.0196461	0.0836514	0.0663705	0.0473246	-0.00840231	0.0241729
95	0	0	0	0	0	0	0	0	0	0	0	0	0	0	0		0	0	0	0
96	0	0	0	0	0	0	0	0	0	0	0	0	0		0	0	0	0	0	0
97	-0.0189117	-0.0362424	-0.0236631	-0.0279378	0.0539533	-0.00783373	-0.0374706	-0.0175824	-0.0357512	-0.00189889	-0.0240817	-0.0339095	-0.0192896	-0.0220874	-0.0265357	0.00408296		-0.0186519	0.242397	0.0216785
98	0.00722157	0.0666034		0.0266102	0.181706	0.0189769	0.159659	0.0767808	0.0336417	0.0950215	0.0857248	0.0430688	-0.00849449	0.0404251	0.068913	0.0101885	0.0186908	0.0607339	0.159955	0.166622
99	0	0	0	0	0	0	0	0	0	0	0	0	0	0		0	0	0	0	0
100	0.210346	0.0981594	0.269975	0.228505	-0.0233185	0.312652	0.206997	-0.0143615	0.23154	-0.0128842	0.00789679	0.2507	0.227648	0.220334	0.199043	0.244922	0.141296		0.0528791	0.0329906
101	0.172885	0.204668		0.0370438	0.161224	0.168695	0.188366	0.141057	0.136917	0.124858	0.183784	0.205604	0.0471649	0.113966	0.137224	0.186761	0.167119	0.149737	0.145918	0.175431
102	0	0	0	0	0	0	0	0	0		0	0	0	0	0	0	0	0	0	0
103	0	0	0	0	0		0	0	0	0	0	0	0	0	0	0	0	0	0	0
104	0.0225461	0.0368621	0.114776	0.0657322	0.0764522	0.0800205	0.10478	0.108046	0.0654782	0.0861237	0.0712795	0.1234	0.0315227	0.0557161	0.0605043	0.025479		0.0798053	0.0506063	0.054153
105	0.213207	0.124093	0.211399	0.169786	-0.0172071	0.230493	0.123615	0.0229211	0.177315		0.0111274	0.21114	0.20542	0.14959	0.135834	0.22628	0.151558	0.0498676	0.00199662	0.0120948
106	0	0	0	0	0	0	0	0	0	0	0	0	0	0		0	0	0	0	0
107	0	0	0	0	0		0	0	0	0	0	0	0	0	0	0	0	0	0	0
108	-0.0949788	-0.0956952	-0.110541	-0.0946973	0.00137514	-0.0964974	-0.0492959	-0.0609927	-0.0943966	-0.0503224	-0.0548188	-0.103963	-0.0968064	-0.0851724	-0.0753724	-0.102036	-0.0948574	-0.0699409	-0.00169418
109	0	0	0	0	0	0	0	0	0	0	0	0	0	0	0	0	0	0	0
110	0	0	0	0	0	0	0	0	0	0	0		0	0	0	0	0	0	0	0
111	0	0	0	0	0	0	0	0	0	0	0	0	0		0	0	0	0	0	0
112	0	0	0	0	0	0	0	0	0	0	0	0	0	0	0		0	0	0	0
113	0	0	0		0	0	0	0	0	0	0	0	0	0	0	0	0	0	0	0
114	0	0		0	0	0	0	0	0	0	0	0	0	0	0	0	0	0	0	0
115	0	0	0	0	0		0	0	0	0	0	0	0	0	0	0	0	0	0	0
116	0	0	0	0	0	0	0	0	0	0	0	0	0	0	0		0	0	0	0
117	0	0	0	0	0	0		0	0	0	0	0	0	0	0	0	0	0	0	0
118	0	0	0	0	0	0	0	0	0	0	0	0	0	0	0	0		0	0	0
119	0.107075	0.111904	0.160433	0.195574	0.10387	0.130394	0.175119		0.21038	0.0399553	0.029234	0.149226	0.10209	0.184312	0.243531	0.156781	0.115963	0.0229787	0.239807	0.136214
120	0	0	0	0	0	0	0	0	0	0	0	0	0		0	0	0	0	0	0
121	-0.0215323	-0.0502271	-0.0495359	-0.0159726	0.0157473	-0.0472106	-0.0153963	-0.0342649	-0.017919	-0.0285051	0.00236038	-0.0384395	-0.0379562	0.027286		-0.000863848	-0.0169078	-0.0338274	0.244808	0.0265777
122	0	0	0	0	0	0	0	0	0	0		0	0	0	0	0	0	0	0	0
123	0.0534385	0.151944	0.122862	0.0693486	0.118742	0.114116	0.0957702	0.0899644	0.0622154	0.107001	0.029162	0.0969285	0.0937441	0.0387675	0.0478944	0.0974987	0.0671306	0.0668366	0.0132078
124	0	0	0	0	0		0	0	0	0	0	0	0	0	0	0	0	0	0	0
125	0		0	0	0	0	0	0	0	0	0	0	0	0	0	0	0	0	0	0
126	0	0		0	0	0	0	0	0	0	0	0	0	0	0	0	0	0	0	0
127	0	0	0	0	0	0	0	0	0	0	0	0	0	0	0	0	0		0	0
128	0	0	0	0	0		0	0	0	0	0	0	0	0	0	0	0	0	0	0
129	0	0	0	0	0	0	0	0	0	0	0	0		0	0	0	0	0	0	0
130	0	0		0	0	0	0	0	0	0	0	0	0	0	0	0	0	0	0	0
131	0	0	0	0	0		0	0	0	0	0	0	0	0	0	0	0	0	0	0
132	0	0	0	0	0	0	0	0	0	0	0	0	0	0		0	0	0	0	0
133	0	0	0	0		0	0	0	0	0	0	0	0	0	0	0	0	0	0	0
134	0	0	0	0	0	0	0	0	0		0	0	0	0	0	0	0	0	0	0
135	0	0	0	0	0	0	0	0	0	0	0	0	0	0		0	0	0	0	0
136	0	0	0	0	0		0	0	0	0	0	0	0	0	0	0	0	0	0	0
137	0	0	0	0	0	0	0	0	0	0	0	0	0	0	0	0	0	0	0
138	0.0143262	0.0222159	0.132712	0.0116565	0.10931	0.088387	0.0840002	0.101351	-0.0505091	0.0954975	0.0518276	0.0278476	0.0545744		-0.0482605	0.0176218	0.00143664	0.0707604	0.126356	0.071686
139	0	0	0	0	0	0	0	0	0	0	0	0	0		0	0	0	0	0	0
140	0.221062	0.208918		0.139963	0.443595	0.0940103	0.312265	0.374607	0.180481	0.389276	0.375903	0.00826672	0.151301	0.237029	0.255743	0.142458	0.209677	0.358694	0.447282	0.441933
141		0	0	0	0	0	0	0	0	0	0	0	0	0	0	0	0	0	0	0
142	-0.0960824	-0.0914394	-0.106015	-0.0934069	-6.89876e-06	-0.0858255	-0.0462253	-0.0659595	-0.093305	-0.0571	-0.0635067	-0.100065	-0.0968806	-0.0864499	-0.073782	-0.100256	-0.0980125	-0.0733118	0.0064678
143	0	0		0	0	0	0	0	0	0	0	0	0	0	0	0	0	0	0	0
144	0	0	0	0	0		0	0	0	0	0	0	0	0	0	0	0	0	0	0
145	0	0	0	0	0	0	0	0		0	0	0	0	0	0	0	0	0	0	0
146	0	0		0	0	0	0	0	0	0	0	0	0	0	0	0	0	0	0	0
147	0	0	0	0	0	0	0	0	0	0	0	0	0	0	0	0	0	0	0
148	0	0	0	0	0	0	0		0	0	0	0	0	0	0	0	0	0	0	0
149		0	0	0	0	0	0	0	0	0	0	0	0	0	0	0	0	0	0	0
150	0	0	0	0	0	0	0	0	0		0	0	0	0	0	0	0	0	0	0
151	0	0	0	0	0	0	0	0	0	0	0		0	0	0	0	0	0	0	0
152	0	0	0		0	0	0	0	0	0	0	0	0	0	0	0	0	0	0	0
153	0	0		0	0	0	0	0	0	0	0	0	0	0	0	0	0	0	0	0
154	0	0	0	0	0	0	0	0	0		0	0	0	0	0	0	0	0	0	0
155	0	0	0	0	0	0	0	0	0	0	0	0	0	0		0	0	0	0	0
156	0	0	0	0	0	0	0	0	0	0	0	0	0	0	0		0	0	0	0
157	0	0	0	0	0	0	0	0	0	0	0	0	0	0	0	0	0	0		0
158	0	0	0	0	0	0	0	0	0	0	0	0	0	0	0	0		0	0	0
159		0	0	0	0	0	0	0	0	0	0	0	0	0	0	0	0	0	0	0
160		0	0	0	0	0	0	0	0	0	0	0	0	0	0	0	0	0	0	0
161	0	0		0	0	0	0	0	0	0	0	0	0	0	0	0	0	0	0	0
162	0	0	0	0	0	0	0	0	0	0		0	0	0	0	0	0	0	0	0
163		0	0	0	0	0	0	0	0	0	0	0	0	0	0	0	0	0	0	0
164		0	0	0	0	0	0	0	0	0	0	0	0	0	0	0	0	0	0	0
165	0	0	0	0	0	0	0	0	0	0	0	0	0		0	0	0	0	0	0
166	0	0	0	0	0	0	0		0	0	0	0	0	0	0	0	0	0	0	0
167	0.00114245	-0.00996783	0.0324505	-0.000555317	-0.0655833	0.0281969	-0.00817399	-0.0415493	0.0074255	-0.0445078	-0.0460901	0.0274646	0.00594152	-0.00263286	-0.00254688	0.0293754		-0.0366246	-0.0723756	-0.0628613
168	0	0	0	0	0	0	0	0	0	0	0	0	0		0	0	0	0	0	0
169	0	0	0	0	0	0	0	0	0	0	0	0	0	0		0	0	0	0	0
170	0	0	0	0	0	0	0	0		0	0	0	0	0	0	0	0	0	0	0
171	0.191696	0.217663	0.198876	0.184735	0.12747	0.167914	0.176014	0.202031	0.203642	0.190983	0.183271	0.206081	0.170427	0.16848	0.207822	0.213782	0.203432	0.204144		0.103269
172	0	0	0		0	0	0	0	0	0	0	0	0	0	0	0	0	0	0	0
173	0	0	0	0	0	0	0	0	0	0	0	0	0	0	0	0		0	0	0
174		-0.0337953	-0.00413433	0.0211389	-0.0576838	-0.0237841	-0.0374044	-0.0318095	0.000543638	-0.0388248	-0.0435502	-0.0344144	-0.00836224	0.00260332	-0.00543495	-0.0144337	-0.0296477	-0.0235977	-0.0521535	-0.064019
175	0	0	0	0	0	0		0	0	0	0	0	0	0	0	0	0	0	0	0
176	0.00567832	-0.0451487	0.0697287		-0.0436671	0.0929043	0.000309266	-0.0852145	-0.0105742	-0.0912774	-0.0994748	0.0332382	0.0217417	-0.00703953	-0.0128536	0.0329544	-0.011841	-0.0786336	0.18824	-0.0177358
177		0	0	0	0	0	0	0	0	0	0	0	0	0	0	0	0	0	0	0
178	0	0	0		0	0	0	0	0	0	0	0	0	0	0	0	0	0	0	0
179	0	0	0	0	0	0	0	0	0	0	0	0	0		0	0	0	0	0	0
180	0.0589214	0.0614877	0.152314	0.119777	-0.0069423	0.0778454	0.0818207	0.0542069	0.13364	0.0740844	0.0506187	0.0871028	0.0843792	0.117276	0.160816	0.0788479	0.0666117	0.0503408		-0.017654
181	0	0	0	0	0	0	0	0	0	0	0	0	0	0		0	0	0	0	0
182		-0.0140964	0.0570921	0.0170553	-0.046583	0.0152204	0.00550366	-0.0232814	0.0150812	-0.0295551	-0.0399273	0.0510098	0.0102906	0.0061093	0.0110076	0.0311177	0.0160488	-0.0191071	-0.0472479	-0.0492898
183	-0.0913824	-0.0872144	-0.104955	-0.0905489	0.00588056	-0.0892803	-0.0443337	-0.0626754	-0.0934238	-0.0542579	-0.0610355	-0.101236	-0.0987812	-0.0882355	-0.0706314	-0.097232	-0.0914497	-0.0692389	0.00116036
184	0	0	0	0	0	0	0	0	0		0	0	0	0	0	0	0	0	0	0
185	0	0	0		0	0	0	0	0	0	0	0	0	0	0	0	0	0	0	0
186	0	0	0	0	0		0	0	0	0	0	0	0	0	0	0	0	0	0	0
187	0.0169554	0.0468387	0.0671536	0.0776435	0.140405	0.024814	0.0551041	0.11064	0.056163	0.135649	0.093536	0.00981543	0.032899	0.0348137	0.114337	-0.00984139		0.0844187	0.111871	0.0840859
188	0		0	0	0	0	0	0	0	0	0	0	0	0	0	0	0	0	0	0
189	0	0	0	0	0	0	0	0	0	0	0	0	0	0	0	0	0		0	0
190	0	0	0		0	0	0	0	0	0	0	0	0	0	0	0	0	0	0	0
191	0.0231928	0.00263356	0.0697672	0.00607439	-0.0551418	0.159939	0.00157866	-0.0500193	0.00674013	-0.0558319	-0.0635111	0.0519697	0.0384847	-0.0115442	-0.00163311	0.0381235	-0.00608289	-0.0486022		-0.0556819
192	0	0	0	0	0	0	0	0	0		0	0	0	0	0	0	0	0	0	0
193	0	0	0	0	0	0	0	0	0	0	0	0	0	0		0	0	0	0	0
194	0	0	0	0	0	0	0	0	0	0	0	0	0	0		0	0	0	0	0
195	-0.0854077	-0.0846475	-0.0385321	-0.044042	0.00834265	-0.0673289	0.0332696	-0.0634504	-0.0457289	-0.0572343	-0.0620309	-0.0331881	-0.0699927	-0.0445133	-0.0351832	-0.0681129	-0.0833666	-0.0718087	0.00210092
196	0	0	0	0	0	0	0	0	0		0	0	0	0	0	0	0	0	0	0
197	0	0	0		0	0	0	0	0	0	0	0	0	0	0	0	0	0	0	0
198	0	0	0	0	0	0	0	0	0	0	0		0	0	0	0	0	0	0	0
199	0	0	0	0	0		0	0	0	0	0	0	0	0	0	0	0	0	0	0
200	0	0	0	0	0	0	0	0		0	0	0	0	0	0	0	0	0	0	0
201	0	0	0		0	0	0	0	0	0	0	0	0	0	0	0	0	0	0	0
202	0	0	0	0	0	0	0	0	0	0	0	0	0	0	0	0		0	0	0
203	0	0	0	0	0	0	0	0	0		0	0	0	0	0	0	0	0	0	0
204	0	0	0	0	0	0	0	0	0	0	0	0	0		0	0	0	0	0	0
205	0	0	0	0	0	0	0	0	0	0	0	0	0	0		0	0	0	0	0

## Sheet: C0403
pos	A	C	D	E	F	G	H	I	K	L	M	N	P	Q	R	S	T	V	W	Y
25	0	0	0	0	0		0	0	0	0	0	0	0	0	0	0	0	0	0	0
26	0	0	0	0	0	0	0	0	0	0	0	0	0	0	0		0	0	0	0
27	0	0	0	0	0	0		0	0	0	0	0	0	0	0	0	0	0	0	0
28	0	0	0	0	0	0	0	0	0	0	0	0	0	0	0		0	0	0	0
29	0	0	0	0	0	0	0	0	0	0		0	0	0	0	0	0	0	0	0
30	0	0	0	0	0	0	0	0	0	0	0	0	0	0		0	0	0	0	0
31	-0.0533371	-0.0532978	-0.0599714	-0.0521053	0.00303208	-0.0525774	-0.0268962	-0.0356568	-0.0509963	-0.0311612	-0.0348209	-0.0550556	-0.0511255	-0.0492548	-0.039958	-0.0532754	-0.0501565	-0.0398134	-0.00630704
32	0	0	0	0		0	0	0	0	0	0	0	0	0	0	0	0	0	0	0
33	0.15738	0.170778	0.197587	0.102208	0.0539267	0.1721	0.0905562	0.0923246	0.120578	0.0630881	0.0432498	0.167103	0.148714	0.0884088	0.084213	0.203572	0.159721	0.10842	0.00684439
34	0	0	0	0	0	0	0	0	0	0	0	0	0	0	0	0		0	0	0
35		0	0	0	0	0	0	0	0	0	0	0	0	0	0	0	0	0	0	0
36	0	0	0	0	0	0	0	0	0	0	0	0	0	0	0	0	0		0	0
37	0	0	0	0	0	0	0	0	0	0	0	0	0	0	0		0	0	0	0
38	0	0	0	0	0	0	0	0	0	0	0	0	0	0		0	0	0	0	0
39	0	0	0	0	0	0	0	0	0	0	0	0		0	0	0	0	0	0	0
40	0	0	0	0	0	0	0	0	0	0	0	0	0	0	0		0	0	0	0
41	0	0	0	0	0	0	0	0	0	0	0	0	0	0		0	0	0	0	0
42	0	0	0	0	0		0	0	0	0	0	0	0	0	0	0	0	0	0	0
43	0	0	0		0	0	0	0	0	0	0	0	0	0	0	0	0	0	0	0
44	0	0	0	0	0	0	0	0	0	0	0	0		0	0	0	0	0	0	0
45	0	0	0	0	0	0		0	0	0	0	0	0	0	0	0	0	0	0	0
46	0	0	0	0		0	0	0	0	0	0	0	0	0	0	0	0	0	0	0
47	0	0	0	0	0	0	0		0	0	0	0	0	0	0	0	0	0	0	0
48		0.00520487	0.0207491	0.00823212	0.0359228	0.0154735	0.0168935	0.0418937	0.00124295	0.02318	0.0109075	0.00728451	-0.00931588	0.00131787	0.000642555	0.00309769	-0.0216811	0.0293435	0.0319466	0.0199517
49	0	0	0	0	0	0	0	0	0	0	0	0	0	0	0	0	0		0	0
50	0	0	0	0	0		0	0	0	0	0	0	0	0	0	0	0	0	0	0
51	0	0	0	0	0	0	0	0	0	0	0	0	0	0	0	0	0	0	0
52	0	0	0	0	0	0	0	0	0	0	0	0	0	0	0	0	0		0	0
53	0	0		0	0	0	0	0	0	0	0	0	0	0	0	0	0	0	0	0
54	0	0		0	0	0	0	0	0	0	0	0	0	0	0	0	0	0	0	0
55	0	0	0	0	0	0	0	0	0	0	0	0	0	0	0	0		0	0	0
56	0	0	0	0	0	0	0	0	0	0	0	0	0		0	0	0	0	0	0
57	0	0	0	0		0	0	0	0	0	0	0	0	0	0	0	0	0	0	0
58	0	0	0	0	0	0	0	0	0	0	0	0	0	0	0	0	0		0	0
59	0	0	0	0	0	0	0	0	0	0	0	0	0	0		0	0	0	0	0
60	0	0	0	0		0	0	0	0	0	0	0	0	0	0	0	0	0	0	0
61	0	0		0	0	0	0	0	0	0	0	0	0	0	0	0	0	0	0	0
62	0	0	0	0	0	0	0	0	0	0	0	0	0	0	0		0	0	0	0
63	0	0		0	0	0	0	0	0	0	0	0	0	0	0	0	0	0	0	0
64		0	0	0	0	0	0	0	0	0	0	0	0	0	0	0	0	0	0	0
65		0	0	0	0	0	0	0	0	0	0	0	0	0	0	0	0	0	0	0
66	0	0	0	0	0	0	0	0	0	0	0	0	0	0	0		0	0	0	0
67	0	0	0	0	0	0	0	0	0	0	0	0		0	0	0	0	0	0	0
68	0	0	0	0	0	0	0	0	0	0	0	0	0	0		0	0	0	0	0
69	-0.0393502	-0.0378885	0.0127017	-0.0151834	-0.0135406		-0.0319024	-0.0044182	-0.0140326	-0.0128788	-0.00982957	-0.0260726	-0.0399823	-0.0331967	-0.0199424	-0.0275318	-0.0355578	-0.0136431	-0.0232988	-0.0251204
70	0	0	0		0	0	0	0	0	0	0	0	0	0	0	0	0	0	0	0
71	0	0	0	0	0	0	0	0	0	0	0	0		0	0	0	0	0	0	0
72	0	0	0	0	0	0	0	0	0	0	0	0	0	0		0	0	0	0	0
73		0	0	0	0	0	0	0	0	0	0	0	0	0	0	0	0	0	0	0
74	0	0	0	0	0	0	0	0	0	0	0	0		0	0	0	0	0	0	0
75	0	0	0	0	0	0	0	0	0	0	0	0	0	0	0	0	0	0		0
76	0	0	0	0	0	0	0	0	0	0	0	0	0	0	0	0	0		0	0
77	0	0	0		0	0	0	0	0	0	0	0	0	0	0	0	0	0	0	0
78	0	0	0	0	0	0	0	0	0	0	0	0	0		0	0	0	0	0	0
79	0	0	0		0	0	0	0	0	0	0	0	0	0	0	0	0	0	0	0
80	0	0	0	0	0		0	0	0	0	0	0	0	0	0	0	0	0	0	0
81	0	0	0	0	0	0	0	0	0	0	0	0		0	0	0	0	0	0	0
82	0	0	0		0	0	0	0	0	0	0	0	0	0	0	0	0	0	0	0
83	-0.0609477	-0.0540341	-0.068168	-0.0614028	0.0105436	-0.0623902	-0.0436396	-0.0328951	-0.0639475	-0.0291604	-0.0368194	-0.0662869	-0.0662872	-0.0605829	-0.0556368	-0.0668169	-0.0622932	-0.0390656	0.0135789
84	0	0	0	0	0	0	0	0	0	0	0	0	0	0	0	0	0	0		0
85	0	0		0	0	0	0	0	0	0	0	0	0	0	0	0	0	0	0	0
86	-0.0368903	-0.0429901	-0.0130739	0.00059395	-0.000353027	-0.0395734	-0.0169977	0.0209542	-0.000216499	0.0206614	0.0102042	-0.0257733	0.00388307	0.0249891		-0.0271146	-0.0286492	0.0063077	-0.0230055	-0.0250155
87	0.0347033	0.0610006	0.0290879		0.0309212	0.110659	0.0459077	0.0955283	0.021714	0.0599611	0.0668323	0.138353	-0.00208921	0.0372338	0.0152353	0.0661644	0.0419715	0.0749041	0.026773	0.0238403
88	0	0	0	0	0	0	0	0	0	0	0	0	0	0	0	0		0	0	0
89	0	0	0	0	0	0	0	0	0	0	0	0	0		0	0	0	0	0	0
90	0.0249579	0.0508165	0.0566323	0.00862766	0.0585421	0.0390024	0.0201054	0.0921596		0.0699898	0.0459794	0.0703299	0.0135684	-0.00298988	0.007719	0.0330532	0.0371704	0.0819801	0.0148938	0.0190849
91	0.211697	0.396364	0.2725	0.149507	0.0240815	0.1939	0.0400416	0.201023	0.173657	0.108505	0.0649148	0.233108	0.212246	0.126014	0.123978	0.266304	0.235619	0.22932	-0.0175139
92	0	0	0	0	0	0	0	0		0	0	0	0	0	0	0	0	0	0	0
93	0.08948	0.090389	-0.00764556	-0.0274167	0.0347692	0.0723382	-0.0229107	0.103478	-0.00812264	0.0639279	0.0532997	0.00100455	0.0178535	-0.0207654		0.0390022	0.0496637	0.111088	0.00757548	0.00539353
94	0.0140372	0.0338758	0.0981996	0.0147396	0.0116993	0.0644628	0.0272323	0.00302393	-0.0176395	-0.00554599	-0.0146993	0.0809008	0.00195917		-0.0151395	0.0429538	0.0208812	0.00576279	-0.00593357	-0.000651743
95		0	0	0	0	0	0	0	0	0	0	0	0	0	0	0	0	0	0	0
96	0	0	0	0	0	0	0	0	0	0	0	0	0		0	0	0	0	0	0
97		0.0028221	-0.013201	-0.00737415	0.0983209	-0.00753522	-0.015054	0.0328686	-0.00552019	0.0464569	0.0183973	-0.01821	-0.00405204	-0.00351836	0.00409501	0.0152791	0.0271245	0.0292964	0.244661	0.0521502
98	0.00174626	0.0343735		0.0226889	0.191177	0.00306628	0.155279	0.0656252	0.0301399	0.0858888	0.0821989	0.0285212	-0.00528686	0.0409801	0.0619216	0.00585793	0.0129405	0.0498643	0.17813	0.186436
99	0	0	0	0	0	0	0	0	0	0	0	0	0	0		0	0	0	0	0
100	0.0478739	0.014207	0.130199	0.0950639	2.35858e-05	0.159852	0.0755821	0.00245712	0.0816274	0.00330595	-0.00284532	0.0937321	0.0798578	0.0782927	0.070442	0.07502	0.0276444		0.0263334	0.00672188
101	0.00659216	-0.00365841	0.106274	0.0350715	0.006596	0.0206858	-0.0139567	-0.00597056	-0.000637978	-0.00498126	-0.019503		0.0447594	-0.00176444	-0.00290805	0.0176013	0.00652513	-0.00246448	0.0095283	-0.00357898
102	0	0	0	0	0	0	0	0	0		0	0	0	0	0	0	0	0	0	0
103	0	0	0	0	0	0	0	0	0	0	0	0	0	0		0	0	0	0	0
104	-0.000367825	0.0251327	0.0333769	0.00149308	0.05645	0.0224545	0.0186364	0.0925499		0.0709042	0.0492455	0.0341015	0.000400765	-0.00690357	0.000317996	-0.00561911	-0.00504293	0.0706837	0.0197764	0.0194144
105	0.092357	0.0387162	0.0932322	0.0602478	-0.0107321	0.112637	0.0291032	0.00270377	0.0663845		-0.00595794	0.0917721	0.0865634	0.0479995	0.0392531	0.104397	0.0453316	0.00599867	-0.0149619	-0.0180466
106	0	0	0	0	0	0	0	0	0	0	0	0	0	0		0	0	0	0	0
107	0	0	0	0	0		0	0	0	0	0	0	0	0	0	0	0	0	0	0
108	-0.0568673	-0.0609001	-0.0649575	-0.0551139	0.000250175	-0.0551057	-0.0329251	-0.0397773	-0.0553419	-0.0332877	-0.0353996	-0.0615653	-0.0552713	-0.0490501	-0.04486	-0.0601055	-0.0574337	-0.0447699	0.00303987
109	0	0	0	0	0	0	0	0	0	0	0	0	0	0	0	0	0	0	0
110	0	0	0	0	0	0	0	0	0	0	0		0	0	0	0	0	0	0	0
111	0	0	0	0	0	0	0	0	0	0	0	0	0		0	0	0	0	0	0
112	0	0	0	0	0	0	0	0	0	0	0	0	0	0	0		0	0	0	0
113	0	0	0		0	0	0	0	0	0	0	0	0	0	0	0	0	0	0	0
114	0	0		0	0	0	0	0	0	0	0	0	0	0	0	0	0	0	0	0
115	0	0	0	0	0		0	0	0	0	0	0	0	0	0	0	0	0	0	0
116	0	0	0	0	0	0	0	0	0	0	0	0	0	0	0		0	0	0	0
117	0	0	0	0	0	0		0	0	0	0	0	0	0	0	0	0	0	0	0
118	0	0	0	0	0	0	0	0	0	0	0	0	0	0	0	0		0	0	0
119	0.0711861	0.07919	0.0900347	0.114758	0.0756591	0.0745174	0.123618	0.00395791	0.124824		-0.00253364	0.0938508	0.0604104	0.105588	0.152844	0.0984718	0.0705735	0.0271356	0.247251	0.125619
120	0	0	0	0	0	0	0	0	0	0	0	0	0		0	0	0	0	0	0
121	-0.0141675	-0.0276686	-0.0873777	-0.0437566	0.0819997	-0.0510621	-0.0197262	0.0528792	-0.0269045	0.0905147	0.127746	-0.0792584	-0.0531222	0.0148027		-0.0263802	-0.0214749	0.0337966	0.198296	0.0609022
122	0	0	0	0	0	0	0	0	0	0		0	0	0	0	0	0	0	0	0
123	-0.028448	-0.0120223	0.0439285	0.0128613		0.0136207	0.061218	-0.0431401	0.0113522	-0.0277214	-0.0490085	0.0266205	0.0086155	0.0097038	0.00777281	0.0127564	-0.0196652	-0.0555034	-0.0187485	-0.00663778
124	0	0	0	0	0		0	0	0	0	0	0	0	0	0	0	0	0	0	0
125	0		0	0	0	0	0	0	0	0	0	0	0	0	0	0	0	0	0	0
126	0	0		0	0	0	0	0	0	0	0	0	0	0	0	0	0	0	0	0
127	0	0	0	0	0	0	0	0	0		0	0	0	0	0	0	0	0	0	0
128	0	0	0	0	0		0	0	0	0	0	0	0	0	0	0	0	0	0	0
129	0	0	0	0	0	0	0	0	0	0	0	0		0	0	0	0	0	0	0
130	0	0		0	0	0	0	0	0	0	0	0	0	0	0	0	0	0	0	0
131	0	0	0	0	0		0	0	0	0	0	0	0	0	0	0	0	0	0	0
132	0	0	0	0	0	0	0	0	0	0	0	0	0	0		0	0	0	0	0
133	0	0	0	0	0	0	0	0	0		0	0	0	0	0	0	0	0	0	0
134	0	0	0	0	0	0	0	0	0		0	0	0	0	0	0	0	0	0	0
135	0	0	0	0	0	0	0	0	0	0	0	0	0	0		0	0	0	0	0
136	0	0	0	0	0		0	0	0	0	0	0	0	0	0	0	0	0	0	0
137	0	0	0	0	0	0	0	0	0	0	0	0	0	0	0	0	0	0	0
138	0.0147691	-0.00409242	0.0603561	0.0342453	0.0921322	0.0274031	0.032167	0.088922	0.0688797	0.0981468	0.0773838		0.0340026	0.0676235	0.121806	0.0148435	0.0230392	0.0760864	0.185402	0.0827236
139	0	0	0	0	0	0	0	0	0	0	0	0	0		0	0	0	0	0	0
140	-0.00876099	-0.0610675	0.201108	0.0662682		0.034348	0.0155186	-0.0246281	0.00412489	-0.026188	-0.0442955	0.0350136	0.0642415	0.0251272	-0.0132913	0.0375972	-0.0129836	-0.0320391	0.0329313	0.0169161
141		0	0	0	0	0	0	0	0	0	0	0	0	0	0	0	0	0	0	0
142	-0.057093	-0.0502543	-0.0587121	-0.0518909	0.00128481	-0.0529378	-0.0233179	-0.0417023	-0.0545021	-0.03545	-0.0390129	-0.0565252	-0.0554497	-0.0505402	-0.0447455	-0.057014	-0.0566517	-0.045749	0.00390191
143	0	0		0	0	0	0	0	0	0	0	0	0	0	0	0	0	0	0	0
144	0	0	0	0	0		0	0	0	0	0	0	0	0	0	0	0	0	0	0
145	0	0	0	0	0	0	0	0		0	0	0	0	0	0	0	0	0	0	0
146	0	0		0	0	0	0	0	0	0	0	0	0	0	0	0	0	0	0	0
147	0	0	0	0	0	0	0	0	0	0	0	0	0	0	0	0	0	0	0
148	0	0	0	0	0	0	0		0	0	0	0	0	0	0	0	0	0	0	0
149		0	0	0	0	0	0	0	0	0	0	0	0	0	0	0	0	0	0	0
150	0	0	0	0	0	0	0	0	0		0	0	0	0	0	0	0	0	0	0
151	0	0	0	0	0	0	0	0	0	0	0		0	0	0	0	0	0	0	0
152	0	0	0		0	0	0	0	0	0	0	0	0	0	0	0	0	0	0	0
153	0	0		0	0	0	0	0	0	0	0	0	0	0	0	0	0	0	0	0
154	0	0	0	0	0	0	0	0	0		0	0	0	0	0	0	0	0	0	0
155	0	0	0	0	0	0	0	0	0	0	0	0	0	0		0	0	0	0	0
156	0	0	0	0	0	0	0	0	0	0	0	0	0	0	0		0	0	0	0
157	0	0	0	0	0	0	0	0	0	0	0	0	0	0	0	0	0	0		0
158	0	0	0	0	0	0	0	0	0	0	0	0	0	0	0	0		0	0	0
159		0	0	0	0	0	0	0	0	0	0	0	0	0	0	0	0	0	0	0
160		0	0	0	0	0	0	0	0	0	0	0	0	0	0	0	0	0	0	0
161	0	0		0	0	0	0	0	0	0	0	0	0	0	0	0	0	0	0	0
162	0	0	0	0	0	0	0	0	0	0	0	0	0	0	0	0		0	0	0
163		0	0	0	0	0	0	0	0	0	0	0	0	0	0	0	0	0	0	0
164		0	0	0	0	0	0	0	0	0	0	0	0	0	0	0	0	0	0	0
165	0	0	0	0	0	0	0	0	0	0	0	0	0		0	0	0	0	0	0
166	0	0	0	0	0	0	0		0	0	0	0	0	0	0	0	0	0	0	0
167	-0.00306541	-0.00329414	0.01441	-0.0027589	-0.0355076	0.00945476	-0.00959997	-0.0205719	0.000646899	-0.0210014	-0.023872	0.00946483	-0.000660204	-0.00386066	-0.00510838	0.0130436		-0.0182844	-0.0410633	-0.0378742
168	0	0	0	0	0	0	0	0	0	0	0	0	0		0	0	0	0	0	0
169	0	0	0	0	0	0	0	0	0	0	0	0	0	0		0	0	0	0	0
170	0	0	0	0	0	0	0	0		0	0	0	0	0	0	0	0	0	0	0
171	0.056096	0.0655165	0.0655281	0.0550741	0.0245679	0.0426263	0.0496208	0.0672448	0.0704728	0.0601279	0.0559023	0.0692138	0.045192	0.0462023	0.0729029	0.073636	0.0632916	0.0654141		0.00964151
172	0	0	0		0	0	0	0	0	0	0	0	0	0	0	0	0	0	0	0
173		0	0	0	0	0	0	0	0	0	0	0	0	0	0	0	0	0	0	0
174		-0.0191598	0.00140024	0.0168395	-0.037717	-0.0213542	-0.0216455	-0.0203457	0.00479713	-0.0280938	-0.0320079	-0.0176743	-0.00226582	0.00233206	-0.00468416	-0.00410551	-0.018075	-0.0150854	-0.0414006	-0.0436968
175	0	0	0	0	0	0	0	0	0	0	0	0	0	0		0	0	0	0	0
176	0.121515	0.109942	0.0517249		0.0809339	0.152039	0.0122846	0.106295	0.0347049	0.0793003	0.0593987	0.0702005	0.0791543	0.016334	0.0390726	0.117708	0.113398	0.111304	0.212022	0.0581206
177		0	0	0	0	0	0	0	0	0	0	0	0	0	0	0	0	0	0	0
178	0	0	0		0	0	0	0	0	0	0	0	0	0	0	0	0	0	0	0
179	0	0	0	0	0	0	0	0	0	0	0	0	0		0	0	0	0	0	0
180	0.0199315	0.0240047	0.0380331	0.0246376	0.085646	0.023304	0.0552606	0.0853284	-0.00203093	0.103313	0.107365	0.00445547	0.0224579	0.0652697		-0.00216051	0.00590448	0.0600075	0.227432	0.0683063
181	0	0	0	0	0	0	0	0	0	0	0	0	0	0		0	0	0	0	0
182		-0.010134	0.0554116	0.0225736	-0.0222833	0.0154157	0.0220176	-0.00961718	0.0215069	-0.0134086	-0.0195128	0.0505096	0.0144511	0.0174235	0.0171618	0.026562	0.0141121	-0.00937721	-0.0289608	-0.0224608
183	-0.0544826	-0.0532756	-0.0626314	-0.0538057	0.00267674	-0.0539225	-0.0297655	-0.0367429	-0.0559266	-0.0323212	-0.0359864	-0.0609731	-0.059394	-0.051599	-0.0452738	-0.0600163	-0.0561824	-0.0411919	0.00445809
184	0	0	0	0	0	0	0	0	0		0	0	0	0	0	0	0	0	0	0
185	0	0	0		0	0	0	0	0	0	0	0	0	0	0	0	0	0	0	0
186	0	0	0	0	0		0	0	0	0	0	0	0	0	0	0	0	0	0	0
187	0.00483989	0.017612	0.0344983	0.0331878	0.0554669	0.00868032	0.0134426	0.0500545	0.020254	0.058501	0.0340198	0.00593429	0.00644913	0.00507525	0.047804	-0.00113248		0.0369055	0.032985	0.0193245
188	0		0	0	0	0	0	0	0	0	0	0	0	0	0	0	0	0	0	0
189	0	0	0	0	0	0	0	0	0	0	0	0	0	0	0	0	0		0	0
190	0	0	0		0	0	0	0	0	0	0	0	0	0	0	0	0	0	0	0
191	0.0207895	0.0138474	0.0414657	0.0132365	-0.0230862	0.0702443	0.00726629	-0.0180249	0.0180519	-0.0205267	-0.0231862	0.0356432	0.0264379	0.00678176	0.0142546	0.0398351	0.018387	-0.0132844		-0.0219921
192	0	0	0	0	0	0	0	0	0		0	0	0	0	0	0	0	0	0	0
193	0	0	0	0	0	0	0	0	0	0	0	0	0	0		0	0	0	0	0
194	0	0	0	0	0	0	0	0	0	0	0	0	0	0		0	0	0	0	0
195	-0.0627882	-0.0654603	-0.0317981	-0.0358435	0.00849506	-0.0506967	0.0140535	-0.0408026	-0.0389456	-0.0364139	-0.040842	-0.0305196	-0.057854	-0.0361375	-0.0322162	-0.0539239	-0.060579	-0.0476994	0.0108531
196	0	0	0	0	0	0	0	0	0		0	0	0	0	0	0	0	0	0	0
197	0	0	0		0	0	0	0	0	0	0	0	0	0	0	0	0	0	0	0
198	0	0	0	0	0	0	0	0	0	0	0		0	0	0	0	0	0	0	0
199	0	0	0	0	0		0	0	0	0	0	0	0	0	0	0	0	0	0	0
200	0	0	0	0	0	0	0	0		0	0	0	0	0	0	0	0	0	0	0
201	0	0	0		0	0	0	0	0	0	0	0	0	0	0	0	0	0	0	0
202	0	0	0	0	0	0	0	0	0	0	0	0	0	0	0	0		0	0	0
203	0	0	0	0	0	0	0	0	0		0	0	0	0	0	0	0	0	0	0
204	0	0	0	0	0	0	0	0	0	0	0	0	0		0	0	0	0	0	0
205	0	0	0	0	0	0	0	0	0	0	0	0	0	0		0	0	0	0	0

## Sheet: DRB11202
pos	A	C	D	E	F	G	H	I	K	L	M	N	P	Q	R	S	T	V	W	Y
1	0	0	0	0	0		0	0	0	0	0	0	0	0	0	0	0	0	0	0
2	0	0		0	0	0	0	0	0	0	0	0	0	0	0	0	0	0	0	0
3	0	0	0	0	0	0	0	0	0	0	0	0	0	0	0	0		0	0	0
4	0	0	0	0	0	0	0	0	0	0	0	0	0	0		0	0	0	0	0
5	0	0	0	0	0	0	0	0	0	0	0	0		0	0	0	0	0	0	0
6	0	0	0	0	0	0	0	0	0	0	0	0	0	0		0	0	0	0	0
7	0	0	0	0		0	0	0	0	0	0	0	0	0	0	0	0	0	0	0
8	0	0	0	0	0	0	0	0	0		0	0	0	0	0	0	0	0	0.226759	0
9	0.0538994	0.201671	0.0113058		0.159573	0.0282204	-0.0432256	0.205849	-0.00847812	0.19451	0.105016	-0.0129661	0.0443464	-0.032153	-0.00999052	0.0211319	0.0673598	0.185979	0.0768635	0.00321726
10	0	0	0	0	0	0	0	0	0	0	0	0	0	0	0	0	0	0	0
11	0.0382539	0.0841559	0.0738703	0.0862049	0.219043	0.0756397	0.0753652	0.228175	0.0937461	0.228013	0.186555	0.0254724	0.0887418	0.0768569	0.153727		0.0373982	0.200734	0.204465	0.15182
12	0	0	0	0	0	0	0	0	0	0	0	0	0	0	0	0		0	0	0
13	-0.00227616	0.126587	-0.0123352	-0.0160051	0.12872		0.0628996	0.0626526	-0.021305	0.065843	0.0314414	-0.0157514	-0.00680526	-0.0151433	-0.0047498	0.0266423	0.045216	0.0596787	0.102747	0.0898015
14	0	0	0		0	0	0	0	0	0	0	0	0	0	0	0	0	0	0	0
15	0		0	0	0	0	0	0	0	0	0	0	0	0	0	0	0	0	0	0
16	0	0	0	0	0	0	0	0	0	0	0	0	0	0	0	0	0	0	0
17	0	0	0	0		0	0	0	0	0	0	0	0	0	0	0	0	0	0	0
18	0	0	0	0		0	0	0	0	0	0	0	0	0	0	0	0	0	0	0
19	0	0	0	0	0	0	0	0	0	0	0		0	0	0	0	0	0	0	0
20	0	0	0	0	0		0	0	0	0	0	0	0	0	0	0	0	0	0	0
21	0	0	0	0	0	0	0	0	0	0	0	0	0	0	0	0		0	0	0
22	0	0	0		0	0	0	0	0	0	0	0	0	0	0	0	0	0	0	0
23	0	0	0	0	0	0	0	0	0	0	0	0	0	0		0	0	0	0	0
24	0	0	0	0	0	0	0	0	0	0	0	0	0	0	0	0	0		0	0
25	0	0	0	0	0	0	0	0	0	0	0	0	0	0		0	0	0	0	0
26	0.0348653	0.0158933	0.108365	0.0593093	-0.0033898	0.110713	0.0651013	0.00430646	0.0787985		0.00589369	0.10235	0.0469725	0.0955919	0.0502694	0.0645741	0.0191464	-0.000396912	-0.0118438	0.00630409
27	0	0	0	0	0	0	0	0	0		0	0	0	0	0	0	0	0	0	0
28	0.044955	0.0802267	0.105344		0.148741	0.0972709	0.0894416	0.162637	0.00839752	0.139628	0.123312	0.0659532	0.0384542	0.0109496	0.0243068	0.0409003	0.0515593	0.141051	0.0875435	0.114441
29	0	0	0	0	0	0	0	0	0	0	0	0	0	0		0	0	0	0	0
30	0.10315	0.168025	0.131076	0.0849799	0.173795	0.13928		0.166106	0.069518	0.149515	0.101731	0.0655724	0.0933591	0.049076	0.0848245	0.0933528	0.108604	0.159586	0.196367	0.118873
31	0	0	0	0		0	0	0	0	0	0	0	0	0	0	0	0	0	0	0
32	0	0	0	0	0	0		0	0	0	0	0	0	0	0	0	0	0	0	0
33	0	0	0	0	0	0	0	0	0	0	0		0	0	0	0	0	0	0	0
34	0	0	0	0	0	0	0	0	0	0	0	0	0		0	0	0	0	0	0
35	0	0	0		0	0	0	0	0	0	0	0	0	0	0	0	0	0	0	0
36	0	0	0		0	0	0	0	0	0	0	0	0	0	0	0	0	0	0	0
37	0	0	0	0	0	0	0	0	0		0	0	0	0	0	0	0	0	0	0
38	0	0	0	0	0	0	0	0	0		0	0	0	0	0	0	0	0	0	0
39	0	0	0	0	0	0	0	0	0	0	0	0	0	0		0	0	0	0	0
40	0	0	0	0		0	0	0	0	0	0	0	0	0	0	0	0	0	0	0
41	0	0		0	0	0	0	0	0	0	0	0	0	0	0	0	0	0	0	0
42	0	0	0	0	0	0	0	0	0	0	0	0	0	0	0		0	0	0	0
43	0	0		0	0	0	0	0	0	0	0	0	0	0	0	0	0	0	0	0
44	0	0	0	0	0	0	0	0	0	0	0	0	0	0	0	0	0		0	0
45	0	0	0	0	0		0	0	0	0	0	0	0	0	0	0	0	0	0	0
46	0	0	0		0	0	0	0	0	0	0	0	0	0	0	0	0	0	0	0
47	-0.0383401	-0.0588569	0.00501631	0.00813946		-0.0328275	0.0689728	-0.0390485	0.0212038	-0.0339776	-0.0352376	0.0176874	-0.0352792	0.0431178	0.019543	-0.0172893	-0.0416618	-0.0457044	0.00779111	0.029779
48	0	0	0	0	0	0	0	0	0	0	0	0	0	0		0	0	0	0	0
49		0	0	0	0	0	0	0	0	0	0	0	0	0	0	0	0	0	0	0
50	0	0	0	0	0	0	0	0	0	0	0	0	0	0	0	0	0		0	0
51	0	0	0	0	0	0	0	0	0	0	0	0	0	0	0	0		0	0	0
52	0	0	0		0	0	0	0	0	0	0	0	0	0	0	0	0	0	0	0
53	0	0	0	0	0	0	0	0	0		0	0	0	0	0	0	0	0	0	0
54	0	0	0	0	0		0	0	0	0	0	0	0	0	0	0	0	0	0	0
55	0	0	0	0	0	0	0	0	0	0	0	0	0	0		0	0	0	0	0
56	0	0	0	0	0	0	0	0	0	0	0	0		0	0	0	0	0	0	0
57	0.0957531	0.0330835	0.174956	0.0663997	-0.0574864	0.158322	0.0365574	0.0118641	0.0566721	-0.0267437	-0.0470176	0.111784	0.0818629	0.0413793	0.0306134	0.13586	0.0543924		-0.0321471	-0.0530978
58		0	0	0	0	0	0	0	0	0	0	0	0	0	0	0	0	0	0	0
59	0	0	0		0	0	0	0	0	0	0	0	0	0	0	0	0	0	0	0
60	0	0	0	0	0	0	0	0	0	0	0	0	0	0	0		0	0	0	0
61	0	0	0	0	0	0	0	0	0	0	0	0	0	0	0	0	0	0		0
62	0	0	0	0	0	0	0	0	0	0	0		0	0	0	0	0	0	0	0
63	0	0	0	0	0	0	0	0	0	0	0	0	0	0	0		0	0	0	0
64	0	0	0	0	0	0	0	0	0	0	0	0	0		0	0	0	0	0	0
65	0	0	0	0	0	0	0	0		0	0	0	0	0	0	0	0	0	0	0
66	0	0		0	0	0	0	0	0	0	0	0	0	0	0	0	0	0	0	0
67	-0.0362316	-0.0260083	-0.0544795	-0.0416131	-0.0171957	-0.0582474	-0.0562971		-0.0440088	0.00310494	-0.00587989	-0.0628489	-0.0539842	-0.0306599	-0.0379962	-0.0476602	-0.0334946	-0.00209967	-0.0299228	-0.035073
68	0	0	0	0	0	0	0	0	0		0	0	0	0	0	0	0	0	0	0
69	0	0	0		0	0	0	0	0	0	0	0	0	0	0	0	0	0	0	0
70	0.0128743	0.00390772		-0.0296913	0.00362294	0.112267	-0.0099678	-0.00641148	-0.00771834	-0.00526304	0.0089816	-0.00837619	-0.00134046	0.0171323	0.0125775	-0.00186033	-0.0232911	-0.0116619	0.053439	-0.00336011
71	0.109933	0.13632	0.102106	0.0705848	0.192939	0.0792697	0.0116047	0.160761	0.0135368	0.147382	0.105909	0.0366706	0.0614047	0.009855		0.0519428	0.0791932	0.165841	0.112768	0.107051
72	0	0	0	0	0	0	0	0	0	0	0	0	0	0		0	0	0	0	0
73		0	0	0	0	0	0	0	0	0	0	0	0	0	0	0	0	0	0	0
74		0.0143026	0.0622882	0.0638973	0.0430919	-0.000144823	0.0314606	0.0577933	0.0487081	0.0582939	0.0419286	0.0209882	0.00632762	0.0493435	0.0806809	0.00847612	0.00472667	0.0437422	0.0219281	0.0118445
75	0	0	0	0	0	0	0	0	0	0	0	0	0	0	0	0	0		0	0
76	0	0		0	0	0	0	0	0	0	0	0	0	0	0	0	0	0	0	0
77	-0.00570426	-0.0107953	0.0741751	0.0391404	-0.0201101	0.03492	0.0560412	-0.00899889	0.0524937	-0.0113462	-0.0203491	0.0798761	0.00465599	0.0370525	0.0695752	0.0159342		-0.00492872	-0.00988941	-0.0130654
78	0.058561	0.0871402	0.0110261	-0.000553427	0.0131043	0.0323584	-0.00978486	0.108659	0.00524544	0.0729667	0.0567493	0.00480455	0.0364201	-0.00212136	-0.00166308	0.0272329	0.0457714	0.111455	-0.000587664
79	0		0	0	0	0	0	0	0	0	0	0	0	0	0	0	0	0	0	0
80	0	0	0	0	0	0	0	0	0	0	0	0	0	0		0	0	0	0	0
81	-0.0602389	-0.062147	-0.0436019	-0.043561	0.008877	-0.0510257		-0.0388245	-0.0443261	-0.0336662	-0.03781	-0.0433451	-0.0543359	-0.0428928	-0.0354655	-0.0550755	-0.0590874	-0.0455683	0.00210957	0.00407466
82	0	0	0	0	0	0	0	0	0	0	0		0	0	0	0	0	0	0	0
83	0	0	0	0	0	0	0	0	0	0	0	0	0	0	0	0	0	0	0
84	0	0	0	0	0		0	0	0	0	0	0	0	0	0	0	0	0	0	0
85		0.0205451	0.00317586	-0.00789482	0.0762691	0.0259311	-0.00772834	0.105506	-0.00136618	0.0910787	0.0577379	-0.0037048	0.00424704	-0.00633152	0.00102818	-0.0048415	-0.000980878	0.0846261	0.03836	0.0221013
86	0.0481109	0.0190917	0.146811	0.108202	-0.0247435	0.091207	0.0669802	-0.00291398	0.0886388	-0.0207978	-0.0207326	0.101336	0.102381	0.0847957	0.0672767	0.0919711	0.0457203		-0.017618	-0.0210661
87	0	0	0		0	0	0	0	0	0	0	0	0	0	0	0	0	0	0	0
88	0	0	0	0	0	0	0	0	0	0	0	0	0	0	0		0	0	0	0
89	-0.0239034	-0.0180805	-0.00943787	-0.0216551		0.0305873	0.0205946	-0.00730953	-0.0215054	-0.00848435	0.00305637	-0.015366	-0.00219718	-0.00304045	-0.0229133	-0.0218299	-0.0290115	-0.0103856	0.00254676	-0.00446727
90	-0.0042555	0.0288465	-0.0172209	-0.0170368	0.0804181	-0.0139413	-0.0170235	0.0926252	-0.0180053	0.0950862	0.0698328	-0.018734	-0.0127806	-0.0165217	-0.00977632	-0.0124718		0.0711106	0.0447237	0.0274512
91	0	0	0	0	0	0	0	0	0	0	0	0	0	0	0	0	0		0	0
92	0	0	0	0	0	0	0	0	0	0	0	0	0		0	0	0	0	0	0
93	0	0	0	0	0	0	0	0	0	0	0	0	0	0		0	0	0	0	0
94	0	0	0	0	0	0	0	0	0	0	0	0	0	0		0	0	0	0	0
95	0	0	0	0	0	0	0	0	0	0	0	0	0	0	0	0	0		0	0
96	0	0	0	0	0	0		0	0	0	0	0	0	0	0	0	0	0	0	0
