# Supplementary material for: Evaluating NetMHCpan performance on non-European HLA alleles not present in training data
Source: Front Immunol. 2024 Jan 16;14:1288105. doi: 10.3389/fimmu.2023.1288105 (PMC10825027; doi:10.3389/fimmu.2023.1288105)
Supplement: Supplementary Data Sheet 7 — Distance matrix between HLA sequences. [file DataSheet_7.xlsx]

## Sheet: A_sequence_distance_matrix
	A*01:01	A*01:02	A*01:03	A*01:06	A*01:09	A*01:12	A*01:14	A*01:23	A*01:24	A*01:25	A*01:30	A*02:01	A*02:02	A*02:03	A*02:04	A*02:05	A*02:06	A*02:07	A*02:08	A*02:10	A*02:11	A*02:12	A*02:13	A*02:14	A*02:16	A*02:17	A*02:18	A*02:19	A*02:20	A*02:22	A*02:24	A*02:25	A*02:27	A*02:28	A*02:29	A*02:30	A*02:33	A*02:34	A*02:35	A*02:36	A*02:38	A*02:39	A*02:40	A*02:42	A*02:44	A*02:47	A*02:48	A*02:49	A*02:51
A*01:01	0	0.113333	0.0633333	0.103333	0.0733333	0.146667	0.08	0.0733333	0.223333	0.0666667	0.263333	0.736667	0.74	0.726667	0.723333	0.753333	0.75	0.77	0.74	0.72	0.733333	0.716667	0.716667	0.773333	0.736667	0.746667	0.8	0.553333	0.723333	0.716667	0.723333	0.746667	0.703333	0.766667	0.743333	0.75	0.78	0.75	0.73	0.686667	0.693333	0.686667	0.756667	0.746667	0.69	0.75	0.74	0.71	0.77
A*01:02	0.113333	0	0.13	0.17	0.14	0.213333	0.146667	0.14	0.29	0.133333	0.33	0.803333	0.806667	0.793333	0.79	0.806667	0.803333	0.836667	0.793333	0.773333	0.8	0.783333	0.783333	0.826667	0.803333	0.813333	0.866667	0.62	0.79	0.783333	0.79	0.813333	0.77	0.82	0.81	0.816667	0.846667	0.816667	0.796667	0.753333	0.76	0.753333	0.823333	0.813333	0.743333	0.816667	0.806667	0.776667	0.823333
A*01:03	0.0633333	0.13	0	0.12	0.09	0.163333	0.0966667	0.09	0.24	0.0833333	0.28	0.73	0.733333	0.72	0.696667	0.746667	0.743333	0.763333	0.733333	0.713333	0.726667	0.71	0.71	0.766667	0.73	0.72	0.793333	0.546667	0.716667	0.71	0.716667	0.74	0.696667	0.76	0.736667	0.743333	0.773333	0.743333	0.723333	0.68	0.686667	0.68	0.75	0.74	0.683333	0.743333	0.733333	0.703333	0.763333
A*01:06	0.103333	0.17	0.12	0	0.13	0.143333	0.136667	0.13	0.28	0.0933333	0.32	0.686667	0.74	0.726667	0.673333	0.753333	0.7	0.72	0.74	0.67	0.683333	0.713333	0.713333	0.723333	0.686667	0.696667	0.75	0.55	0.673333	0.716667	0.673333	0.696667	0.7	0.716667	0.693333	0.7	0.73	0.7	0.68	0.636667	0.69	0.636667	0.706667	0.696667	0.686667	0.75	0.69	0.736667	0.72
A*01:09	0.0733333	0.14	0.09	0.13	0	0.173333	0.106667	0.1	0.25	0.0933333	0.29	0.763333	0.766667	0.753333	0.75	0.78	0.776667	0.796667	0.766667	0.746667	0.76	0.743333	0.743333	0.8	0.763333	0.773333	0.826667	0.58	0.75	0.743333	0.75	0.773333	0.73	0.793333	0.77	0.776667	0.806667	0.776667	0.756667	0.713333	0.72	0.713333	0.783333	0.773333	0.716667	0.776667	0.766667	0.736667	0.796667
A*01:12	0.146667	0.213333	0.163333	0.143333	0.173333	0	0.12	0.173333	0.323333	0.13	0.363333	0.656667	0.696667	0.71	0.643333	0.71	0.67	0.69	0.696667	0.64	0.653333	0.63	0.656667	0.693333	0.68	0.666667	0.72	0.466667	0.643333	0.673333	0.643333	0.666667	0.646667	0.686667	0.663333	0.67	0.7	0.67	0.65	0.606667	0.693333	0.606667	0.676667	0.666667	0.603333	0.706667	0.66	0.66	0.69
A*01:14	0.08	0.146667	0.0966667	0.136667	0.106667	0.12	0	0.106667	0.256667	0.1	0.296667	0.71	0.713333	0.7	0.696667	0.726667	0.723333	0.743333	0.713333	0.693333	0.706667	0.69	0.69	0.746667	0.733333	0.72	0.773333	0.526667	0.696667	0.69	0.696667	0.72	0.676667	0.74	0.716667	0.723333	0.753333	0.723333	0.703333	0.66	0.726667	0.66	0.73	0.72	0.663333	0.723333	0.713333	0.683333	0.743333
A*01:23	0.0733333	0.14	0.09	0.13	0.1	0.173333	0.106667	0	0.25	0.0933333	0.29	0.723333	0.726667	0.713333	0.71	0.74	0.736667	0.756667	0.726667	0.706667	0.72	0.703333	0.703333	0.76	0.723333	0.733333	0.786667	0.54	0.71	0.703333	0.71	0.733333	0.69	0.753333	0.73	0.736667	0.766667	0.736667	0.716667	0.673333	0.68	0.673333	0.743333	0.733333	0.676667	0.736667	0.726667	0.696667	0.756667
A*01:24	0.223333	0.29	0.24	0.28	0.25	0.323333	0.256667	0.25	0	0.243333	0.14	0.613333	0.616667	0.603333	0.6	0.63	0.626667	0.646667	0.616667	0.596667	0.61	0.593333	0.593333	0.65	0.613333	0.623333	0.676667	0.606667	0.6	0.593333	0.6	0.623333	0.58	0.643333	0.62	0.626667	0.656667	0.626667	0.606667	0.563333	0.57	0.563333	0.633333	0.623333	0.566667	0.626667	0.616667	0.586667	0.646667
A*01:25	0.0666667	0.133333	0.0833333	0.0933333	0.0933333	0.13	0.1	0.0933333	0.243333	0	0.283333	0.726667	0.766667	0.753333	0.713333	0.78	0.74	0.76	0.766667	0.71	0.723333	0.7	0.7	0.763333	0.726667	0.736667	0.79	0.536667	0.713333	0.743333	0.713333	0.736667	0.686667	0.756667	0.733333	0.74	0.77	0.74	0.72	0.676667	0.676667	0.676667	0.746667	0.736667	0.673333	0.776667	0.73	0.73	0.76
A*01:30	0.263333	0.33	0.28	0.32	0.29	0.363333	0.296667	0.29	0.14	0.283333	0	0.526667	0.53	0.516667	0.513333	0.543333	0.54	0.56	0.53	0.51	0.523333	0.506667	0.506667	0.563333	0.526667	0.536667	0.59	0.52	0.513333	0.506667	0.513333	0.536667	0.493333	0.556667	0.533333	0.54	0.57	0.54	0.52	0.476667	0.483333	0.476667	0.546667	0.536667	0.48	0.54	0.53	0.5	0.56
A*02:01	0.736667	0.803333	0.73	0.686667	0.763333	0.656667	0.71	0.723333	0.613333	0.726667	0.526667	0	0.1	0.103333	0.0633333	0.113333	0.05	0.07	0.126667	0.136667	0.08	0.0633333	0.09	0.0833333	0.06	0.0966667	0.1	0.276667	0.05	0.0666667	0.05	0.0466667	0.08	0.0666667	0.0533333	0.05	0.08	0.05	0.0766667	0.11	0.126667	0.14	0.0566667	0.0466667	0.113333	0.11	0.123333	0.0866667	0.07
A*02:02	0.74	0.806667	0.733333	0.74	0.766667	0.696667	0.713333	0.726667	0.616667	0.766667	0.53	0.1	0	0.0866667	0.126667	0.0233333	0.113333	0.133333	0.0366667	0.2	0.143333	0.113333	0.14	0.0733333	0.123333	0.123333	0.163333	0.326667	0.113333	0.05	0.113333	0.11	0.13	0.13	0.116667	0.113333	0.143333	0.113333	0.14	0.173333	0.176667	0.203333	0.12	0.11	0.163333	0.02	0.186667	0.1	0.133333
A*02:03	0.726667	0.793333	0.72	0.726667	0.753333	0.71	0.7	0.713333	0.603333	0.753333	0.516667	0.103333	0.0866667	0	0.13	0.1	0.116667	0.136667	0.113333	0.203333	0.146667	0.116667	0.09	0.15	0.126667	0.163333	0.166667	0.33	0.116667	0.0533333	0.116667	0.09	0.106667	0.133333	0.12	0.116667	0.146667	0.116667	0.143333	0.176667	0.103333	0.206667	0.123333	0.113333	0.166667	0.0966667	0.19	0.103333	0.136667
A*02:04	0.723333	0.79	0.696667	0.673333	0.75	0.643333	0.696667	0.71	0.6	0.713333	0.513333	0.0633333	0.126667	0.13	0	0.14	0.0766667	0.0966667	0.153333	0.163333	0.106667	0.09	0.116667	0.11	0.0866667	0.0633333	0.126667	0.303333	0.0766667	0.0933333	0.0766667	0.0733333	0.106667	0.0933333	0.08	0.0766667	0.106667	0.0766667	0.103333	0.136667	0.153333	0.166667	0.0833333	0.0733333	0.14	0.136667	0.15	0.113333	0.0966667
A*02:05	0.753333	0.806667	0.746667	0.753333	0.78	0.71	0.726667	0.74	0.63	0.78	0.543333	0.113333	0.0233333	0.1	0.14	0	0.0966667	0.146667	0.02	0.183333	0.156667	0.126667	0.153333	0.0566667	0.136667	0.136667	0.176667	0.34	0.126667	0.0633333	0.126667	0.123333	0.143333	0.113333	0.13	0.126667	0.156667	0.126667	0.153333	0.186667	0.19	0.216667	0.133333	0.123333	0.146667	0.0333333	0.2	0.113333	0.116667
A*02:06	0.75	0.803333	0.743333	0.7	0.776667	0.67	0.723333	0.736667	0.626667	0.74	0.54	0.05	0.113333	0.116667	0.0766667	0.0966667	0	0.0833333	0.11	0.12	0.0933333	0.0766667	0.103333	0.0666667	0.0733333	0.11	0.113333	0.29	0.0633333	0.08	0.0633333	0.06	0.0933333	0.05	0.0666667	0.0633333	0.0933333	0.0633333	0.09	0.123333	0.14	0.153333	0.07	0.06	0.0966667	0.123333	0.136667	0.1	0.0533333
A*02:07	0.77	0.836667	0.763333	0.72	0.796667	0.69	0.743333	0.756667	0.646667	0.76	0.56	0.07	0.133333	0.136667	0.0966667	0.146667	0.0833333	0	0.16	0.173333	0.113333	0.0966667	0.123333	0.116667	0.0933333	0.133333	0.0666667	0.31	0.0833333	0.1	0.0833333	0.08	0.113333	0.1	0.0866667	0.0833333	0.07	0.0833333	0.11	0.143333	0.16	0.176667	0.09	0.08	0.146667	0.143333	0.156667	0.12	0.103333
A*02:08	0.74	0.793333	0.733333	0.74	0.766667	0.696667	0.713333	0.726667	0.616667	0.766667	0.53	0.126667	0.0366667	0.113333	0.153333	0.02	0.11	0.16	0	0.196667	0.17	0.14	0.166667	0.07	0.15	0.15	0.19	0.353333	0.113333	0.0766667	0.14	0.136667	0.156667	0.126667	0.133333	0.14	0.17	0.14	0.166667	0.2	0.203333	0.23	0.146667	0.136667	0.16	0.0466667	0.213333	0.126667	0.13
A*02:10	0.72	0.773333	0.713333	0.67	0.746667	0.64	0.693333	0.706667	0.596667	0.71	0.51	0.136667	0.2	0.203333	0.163333	0.183333	0.12	0.173333	0.196667	0	0.18	0.163333	0.19	0.153333	0.16	0.166667	0.203333	0.376667	0.15	0.166667	0.15	0.146667	0.18	0.136667	0.153333	0.15	0.163333	0.15	0.176667	0.21	0.226667	0.0933333	0.156667	0.146667	0.183333	0.21	0.223333	0.186667	0.14
A*02:11	0.733333	0.8	0.726667	0.683333	0.76	0.653333	0.706667	0.72	0.61	0.723333	0.523333	0.08	0.143333	0.146667	0.106667	0.156667	0.0933333	0.113333	0.17	0.18	0	0.106667	0.133333	0.126667	0.103333	0.14	0.143333	0.32	0.0933333	0.11	0.0933333	0.09	0.123333	0.11	0.0966667	0.0933333	0.123333	0.0933333	0.0733333	0.153333	0.17	0.183333	0.1	0.09	0.156667	0.153333	0.12	0.13	0.113333
A*02:12	0.716667	0.783333	0.71	0.713333	0.743333	0.63	0.69	0.703333	0.593333	0.7	0.506667	0.0633333	0.113333	0.116667	0.09	0.126667	0.0766667	0.0966667	0.14	0.163333	0.106667	0	0.0633333	0.11	0.0866667	0.123333	0.126667	0.25	0.0766667	0.08	0.0766667	0.0733333	0.0533333	0.0933333	0.08	0.0766667	0.106667	0.0766667	0.103333	0.136667	0.1	0.166667	0.0833333	0.0733333	0.0866667	0.123333	0.15	0.0666667	0.0966667
A*02:13	0.716667	0.783333	0.71	0.713333	0.743333	0.656667	0.69	0.703333	0.593333	0.7	0.506667	0.09	0.14	0.09	0.116667	0.153333	0.103333	0.123333	0.166667	0.19	0.133333	0.0633333	0	0.136667	0.113333	0.15	0.153333	0.276667	0.103333	0.106667	0.103333	0.1	0.0533333	0.12	0.106667	0.103333	0.133333	0.103333	0.13	0.163333	0.0733333	0.193333	0.11	0.1	0.113333	0.15	0.176667	0.0933333	0.123333
A*02:14	0.773333	0.826667	0.766667	0.723333	0.8	0.693333	0.746667	0.76	0.65	0.763333	0.563333	0.0833333	0.0733333	0.15	0.11	0.0566667	0.0666667	0.116667	0.07	0.153333	0.126667	0.11	0.136667	0	0.106667	0.106667	0.146667	0.323333	0.0966667	0.113333	0.0966667	0.0933333	0.126667	0.0833333	0.1	0.0966667	0.126667	0.0966667	0.123333	0.156667	0.173333	0.186667	0.103333	0.0933333	0.13	0.0833333	0.17	0.133333	0.0866667
A*02:16	0.736667	0.803333	0.73	0.686667	0.763333	0.68	0.733333	0.723333	0.613333	0.726667	0.526667	0.06	0.123333	0.126667	0.0866667	0.136667	0.0733333	0.0933333	0.15	0.16	0.103333	0.0866667	0.113333	0.106667	0	0.12	0.123333	0.3	0.0733333	0.09	0.0733333	0.07	0.103333	0.09	0.0766667	0.0733333	0.103333	0.0733333	0.1	0.133333	0.126667	0.163333	0.08	0.07	0.136667	0.133333	0.146667	0.11	0.0933333
A*02:17	0.746667	0.813333	0.72	0.696667	0.773333	0.666667	0.72	0.733333	0.623333	0.736667	0.536667	0.0966667	0.123333	0.163333	0.0633333	0.136667	0.11	0.133333	0.15	0.166667	0.14	0.123333	0.15	0.106667	0.12	0	0.163333	0.336667	0.11	0.126667	0.11	0.106667	0.14	0.126667	0.113333	0.11	0.123333	0.11	0.136667	0.17	0.186667	0.17	0.116667	0.106667	0.173333	0.133333	0.183333	0.146667	0.13
A*02:18	0.8	0.866667	0.793333	0.75	0.826667	0.72	0.773333	0.786667	0.676667	0.79	0.59	0.1	0.163333	0.166667	0.126667	0.176667	0.113333	0.0666667	0.19	0.203333	0.143333	0.126667	0.153333	0.146667	0.123333	0.163333	0	0.34	0.113333	0.13	0.113333	0.11	0.143333	0.13	0.116667	0.113333	0.1	0.113333	0.14	0.173333	0.19	0.206667	0.12	0.11	0.176667	0.173333	0.186667	0.15	0.133333
A*02:19	0.553333	0.62	0.546667	0.55	0.58	0.466667	0.526667	0.54	0.606667	0.536667	0.52	0.276667	0.326667	0.33	0.303333	0.34	0.29	0.31	0.353333	0.376667	0.32	0.25	0.276667	0.323333	0.3	0.336667	0.34	0	0.29	0.293333	0.29	0.286667	0.266667	0.306667	0.293333	0.29	0.32	0.29	0.316667	0.226667	0.313333	0.343333	0.296667	0.286667	0.223333	0.336667	0.363333	0.28	0.31
A*02:20	0.723333	0.79	0.716667	0.673333	0.75	0.643333	0.696667	0.71	0.6	0.713333	0.513333	0.05	0.113333	0.116667	0.0766667	0.126667	0.0633333	0.0833333	0.113333	0.15	0.0933333	0.0766667	0.103333	0.0966667	0.0733333	0.11	0.113333	0.29	0	0.08	0.0633333	0.06	0.0933333	0.08	0.0566667	0.0633333	0.0933333	0.0633333	0.09	0.123333	0.14	0.153333	0.07	0.06	0.126667	0.123333	0.136667	0.1	0.0833333
A*02:22	0.716667	0.783333	0.71	0.716667	0.743333	0.673333	0.69	0.703333	0.593333	0.743333	0.506667	0.0666667	0.05	0.0533333	0.0933333	0.0633333	0.08	0.1	0.0766667	0.166667	0.11	0.08	0.106667	0.113333	0.09	0.126667	0.13	0.293333	0.08	0	0.08	0.0766667	0.0966667	0.0966667	0.0833333	0.08	0.11	0.08	0.106667	0.14	0.143333	0.17	0.0866667	0.0766667	0.13	0.06	0.153333	0.0666667	0.1
A*02:24	0.723333	0.79	0.716667	0.673333	0.75	0.643333	0.696667	0.71	0.6	0.713333	0.513333	0.05	0.113333	0.116667	0.0766667	0.126667	0.0633333	0.0833333	0.14	0.15	0.0933333	0.0766667	0.103333	0.0966667	0.0733333	0.11	0.113333	0.29	0.0633333	0.08	0	0.06	0.0933333	0.08	0.0666667	0.0633333	0.0933333	0.0633333	0.09	0.123333	0.14	0.153333	0.07	0.06	0.126667	0.123333	0.136667	0.1	0.0833333
A*02:25	0.746667	0.813333	0.74	0.696667	0.773333	0.666667	0.72	0.733333	0.623333	0.736667	0.536667	0.0466667	0.11	0.09	0.0733333	0.123333	0.06	0.08	0.136667	0.146667	0.09	0.0733333	0.1	0.0933333	0.07	0.106667	0.11	0.286667	0.06	0.0766667	0.06	0	0.09	0.0766667	0.0633333	0.06	0.09	0.06	0.0866667	0.12	0.113333	0.15	0.0666667	0.0566667	0.123333	0.12	0.133333	0.0966667	0.08
A*02:27	0.703333	0.77	0.696667	0.7	0.73	0.646667	0.676667	0.69	0.58	0.686667	0.493333	0.08	0.13	0.106667	0.106667	0.143333	0.0933333	0.113333	0.156667	0.18	0.123333	0.0533333	0.0533333	0.126667	0.103333	0.14	0.143333	0.266667	0.0933333	0.0966667	0.0933333	0.09	0	0.11	0.0966667	0.0933333	0.123333	0.0933333	0.12	0.153333	0.09	0.183333	0.1	0.09	0.103333	0.14	0.166667	0.0833333	0.113333
A*02:28	0.766667	0.82	0.76	0.716667	0.793333	0.686667	0.74	0.753333	0.643333	0.756667	0.556667	0.0666667	0.13	0.133333	0.0933333	0.113333	0.05	0.1	0.126667	0.136667	0.11	0.0933333	0.12	0.0833333	0.09	0.126667	0.13	0.306667	0.08	0.0966667	0.08	0.0766667	0.11	0	0.0833333	0.08	0.11	0.08	0.106667	0.14	0.156667	0.17	0.0866667	0.0766667	0.113333	0.14	0.153333	0.116667	0.07
A*02:29	0.743333	0.81	0.736667	0.693333	0.77	0.663333	0.716667	0.73	0.62	0.733333	0.533333	0.0533333	0.116667	0.12	0.08	0.13	0.0666667	0.0866667	0.133333	0.153333	0.0966667	0.08	0.106667	0.1	0.0766667	0.113333	0.116667	0.293333	0.0566667	0.0833333	0.0666667	0.0633333	0.0966667	0.0833333	0	0.0666667	0.0966667	0.0666667	0.0933333	0.126667	0.143333	0.156667	0.0733333	0.0633333	0.13	0.126667	0.14	0.103333	0.0866667
A*02:30	0.75	0.816667	0.743333	0.7	0.776667	0.67	0.723333	0.736667	0.626667	0.74	0.54	0.05	0.113333	0.116667	0.0766667	0.126667	0.0633333	0.0833333	0.14	0.15	0.0933333	0.0766667	0.103333	0.0966667	0.0733333	0.11	0.113333	0.29	0.0633333	0.08	0.0633333	0.06	0.0933333	0.08	0.0666667	0	0.0933333	0.0633333	0.09	0.123333	0.14	0.153333	0.07	0.06	0.126667	0.123333	0.136667	0.1	0.0833333
A*02:33	0.78	0.846667	0.773333	0.73	0.806667	0.7	0.753333	0.766667	0.656667	0.77	0.57	0.08	0.143333	0.146667	0.106667	0.156667	0.0933333	0.07	0.17	0.163333	0.123333	0.106667	0.133333	0.126667	0.103333	0.123333	0.1	0.32	0.0933333	0.11	0.0933333	0.09	0.123333	0.11	0.0966667	0.0933333	0	0.0933333	0.12	0.153333	0.17	0.166667	0.1	0.09	0.156667	0.153333	0.166667	0.13	0.113333
A*02:34	0.75	0.816667	0.743333	0.7	0.776667	0.67	0.723333	0.736667	0.626667	0.74	0.54	0.05	0.113333	0.116667	0.0766667	0.126667	0.0633333	0.0833333	0.14	0.15	0.0933333	0.0766667	0.103333	0.0966667	0.0733333	0.11	0.113333	0.29	0.0633333	0.08	0.0633333	0.06	0.0933333	0.08	0.0666667	0.0633333	0.0933333	0	0.0666667	0.123333	0.14	0.153333	0.07	0.06	0.126667	0.123333	0.136667	0.1	0.0833333
A*02:35	0.73	0.796667	0.723333	0.68	0.756667	0.65	0.703333	0.716667	0.606667	0.72	0.52	0.0766667	0.14	0.143333	0.103333	0.153333	0.09	0.11	0.166667	0.176667	0.0733333	0.103333	0.13	0.123333	0.1	0.136667	0.14	0.316667	0.09	0.106667	0.09	0.0866667	0.12	0.106667	0.0933333	0.09	0.12	0.0666667	0	0.15	0.166667	0.18	0.0966667	0.0866667	0.153333	0.15	0.116667	0.126667	0.11
A*02:36	0.686667	0.753333	0.68	0.636667	0.713333	0.606667	0.66	0.673333	0.563333	0.676667	0.476667	0.11	0.173333	0.176667	0.136667	0.186667	0.123333	0.143333	0.2	0.21	0.153333	0.136667	0.163333	0.156667	0.133333	0.17	0.173333	0.226667	0.123333	0.14	0.123333	0.12	0.153333	0.14	0.126667	0.123333	0.153333	0.123333	0.15	0	0.2	0.213333	0.13	0.12	0.186667	0.183333	0.196667	0.16	0.143333
A*02:38	0.693333	0.76	0.686667	0.69	0.72	0.693333	0.726667	0.68	0.57	0.676667	0.483333	0.126667	0.176667	0.103333	0.153333	0.19	0.14	0.16	0.203333	0.226667	0.17	0.1	0.0733333	0.173333	0.126667	0.186667	0.19	0.313333	0.14	0.143333	0.14	0.113333	0.09	0.156667	0.143333	0.14	0.17	0.14	0.166667	0.2	0	0.23	0.146667	0.136667	0.15	0.186667	0.213333	0.13	0.16
A*02:39	0.686667	0.753333	0.68	0.636667	0.713333	0.606667	0.66	0.673333	0.563333	0.676667	0.476667	0.14	0.203333	0.206667	0.166667	0.216667	0.153333	0.176667	0.23	0.0933333	0.183333	0.166667	0.193333	0.186667	0.163333	0.17	0.206667	0.343333	0.153333	0.17	0.153333	0.15	0.183333	0.17	0.156667	0.153333	0.166667	0.153333	0.18	0.213333	0.23	0	0.16	0.15	0.18	0.213333	0.226667	0.19	0.173333
A*02:40	0.756667	0.823333	0.75	0.706667	0.783333	0.676667	0.73	0.743333	0.633333	0.746667	0.546667	0.0566667	0.12	0.123333	0.0833333	0.133333	0.07	0.09	0.146667	0.156667	0.1	0.0833333	0.11	0.103333	0.08	0.116667	0.12	0.296667	0.07	0.0866667	0.07	0.0666667	0.1	0.0866667	0.0733333	0.07	0.1	0.07	0.0966667	0.13	0.146667	0.16	0	0.0666667	0.133333	0.13	0.143333	0.106667	0.05
A*02:42	0.746667	0.813333	0.74	0.696667	0.773333	0.666667	0.72	0.733333	0.623333	0.736667	0.536667	0.0466667	0.11	0.113333	0.0733333	0.123333	0.06	0.08	0.136667	0.146667	0.09	0.0733333	0.1	0.0933333	0.07	0.106667	0.11	0.286667	0.06	0.0766667	0.06	0.0566667	0.09	0.0766667	0.0633333	0.06	0.09	0.06	0.0866667	0.12	0.136667	0.15	0.0666667	0	0.123333	0.12	0.133333	0.0966667	0.08
A*02:44	0.69	0.743333	0.683333	0.686667	0.716667	0.603333	0.663333	0.676667	0.566667	0.673333	0.48	0.113333	0.163333	0.166667	0.14	0.146667	0.0966667	0.146667	0.16	0.183333	0.156667	0.0866667	0.113333	0.13	0.136667	0.173333	0.176667	0.223333	0.126667	0.13	0.126667	0.123333	0.103333	0.113333	0.13	0.126667	0.156667	0.126667	0.153333	0.186667	0.15	0.18	0.133333	0.123333	0	0.173333	0.2	0.116667	0.116667
A*02:47	0.75	0.816667	0.743333	0.75	0.776667	0.706667	0.723333	0.736667	0.626667	0.776667	0.54	0.11	0.02	0.0966667	0.136667	0.0333333	0.123333	0.143333	0.0466667	0.21	0.153333	0.123333	0.15	0.0833333	0.133333	0.133333	0.173333	0.336667	0.123333	0.06	0.123333	0.12	0.14	0.14	0.126667	0.123333	0.153333	0.123333	0.15	0.183333	0.186667	0.213333	0.13	0.12	0.173333	0	0.196667	0.11	0.143333
A*02:48	0.74	0.806667	0.733333	0.69	0.766667	0.66	0.713333	0.726667	0.616667	0.73	0.53	0.123333	0.186667	0.19	0.15	0.2	0.136667	0.156667	0.213333	0.223333	0.12	0.15	0.176667	0.17	0.146667	0.183333	0.186667	0.363333	0.136667	0.153333	0.136667	0.133333	0.166667	0.153333	0.14	0.136667	0.166667	0.136667	0.116667	0.196667	0.213333	0.226667	0.143333	0.133333	0.2	0.196667	0	0.173333	0.156667
A*02:49	0.71	0.776667	0.703333	0.736667	0.736667	0.66	0.683333	0.696667	0.586667	0.73	0.5	0.0866667	0.1	0.103333	0.113333	0.113333	0.1	0.12	0.126667	0.186667	0.13	0.0666667	0.0933333	0.133333	0.11	0.146667	0.15	0.28	0.1	0.0666667	0.1	0.0966667	0.0833333	0.116667	0.103333	0.1	0.13	0.1	0.126667	0.16	0.13	0.19	0.106667	0.0966667	0.116667	0.11	0.173333	0	0.12
A*02:51	0.77	0.823333	0.763333	0.72	0.796667	0.69	0.743333	0.756667	0.646667	0.76	0.56	0.07	0.133333	0.136667	0.0966667	0.116667	0.0533333	0.103333	0.13	0.14	0.113333	0.0966667	0.123333	0.0866667	0.0933333	0.13	0.133333	0.31	0.0833333	0.1	0.0833333	0.08	0.113333	0.07	0.0866667	0.0833333	0.113333	0.0833333	0.11	0.143333	0.16	0.173333	0.05	0.08	0.116667	0.143333	0.156667	0.12	0
A*02:52	0.686667	0.753333	0.68	0.636667	0.713333	0.606667	0.66	0.673333	0.563333	0.676667	0.54	0.166667	0.23	0.233333	0.193333	0.243333	0.18	0.2	0.256667	0.15	0.21	0.193333	0.22	0.213333	0.19	0.226667	0.23	0.406667	0.18	0.196667	0.18	0.176667	0.21	0.196667	0.183333	0.18	0.21	0.18	0.206667	0.24	0.256667	0.153333	0.186667	0.176667	0.243333	0.24	0.253333	0.216667	0.2
A*02:54	0.68	0.733333	0.673333	0.676667	0.706667	0.593333	0.653333	0.666667	0.556667	0.663333	0.47	0.15	0.2	0.203333	0.176667	0.183333	0.133333	0.183333	0.196667	0.22	0.193333	0.123333	0.15	0.166667	0.173333	0.21	0.213333	0.213333	0.163333	0.166667	0.163333	0.16	0.14	0.15	0.166667	0.163333	0.193333	0.163333	0.19	0.1	0.186667	0.253333	0.17	0.16	0.143333	0.21	0.236667	0.153333	0.153333
A*02:58	0.743333	0.81	0.736667	0.693333	0.77	0.663333	0.716667	0.73	0.62	0.733333	0.533333	0.0533333	0.08	0.12	0.08	0.0933333	0.0666667	0.0866667	0.106667	0.153333	0.0966667	0.08	0.106667	0.0633333	0.0766667	0.0766667	0.116667	0.293333	0.0666667	0.0833333	0.0666667	0.0633333	0.0966667	0.0833333	0.07	0.0666667	0.0966667	0.0666667	0.0933333	0.126667	0.143333	0.156667	0.0733333	0.0633333	0.13	0.09	0.14	0.103333	0.0866667
A*02:60	0.743333	0.81	0.736667	0.693333	0.77	0.663333	0.716667	0.73	0.62	0.733333	0.543333	0.0533333	0.116667	0.12	0.08	0.13	0.0666667	0.0866667	0.143333	0.153333	0.0966667	0.08	0.106667	0.1	0.0766667	0.113333	0.116667	0.293333	0.0666667	0.0833333	0.0666667	0.0633333	0.0966667	0.0833333	0.07	0.0666667	0.0966667	0.0666667	0.0933333	0.126667	0.143333	0.156667	0.0733333	0.0633333	0.13	0.126667	0.14	0.103333	0.0866667
A*02:63	0.746667	0.813333	0.74	0.746667	0.773333	0.703333	0.72	0.733333	0.623333	0.773333	0.536667	0.126667	0.0366667	0.113333	0.153333	0.05	0.14	0.16	0.0633333	0.226667	0.17	0.14	0.166667	0.1	0.15	0.15	0.19	0.353333	0.14	0.0766667	0.14	0.136667	0.156667	0.156667	0.143333	0.14	0.17	0.14	0.166667	0.2	0.203333	0.23	0.146667	0.136667	0.19	0.0466667	0.213333	0.126667	0.16
A*02:64	0.72	0.786667	0.713333	0.67	0.746667	0.64	0.693333	0.706667	0.596667	0.71	0.57	0.08	0.143333	0.146667	0.106667	0.156667	0.0933333	0.113333	0.17	0.18	0.123333	0.106667	0.133333	0.126667	0.103333	0.14	0.143333	0.32	0.0933333	0.11	0.0933333	0.09	0.123333	0.11	0.0966667	0.0933333	0.123333	0.0933333	0.12	0.153333	0.17	0.183333	0.1	0.09	0.156667	0.153333	0.166667	0.13	0.113333
A*02:76	0.776667	0.776667	0.77	0.726667	0.803333	0.696667	0.75	0.763333	0.653333	0.766667	0.566667	0.0766667	0.14	0.143333	0.103333	0.14	0.0766667	0.11	0.153333	0.163333	0.12	0.103333	0.13	0.11	0.1	0.136667	0.14	0.316667	0.09	0.106667	0.09	0.0866667	0.12	0.0933333	0.0933333	0.09	0.12	0.09	0.116667	0.15	0.166667	0.18	0.0966667	0.0866667	0.14	0.15	0.163333	0.126667	0.0966667
A*02:79	0.73	0.783333	0.723333	0.68	0.756667	0.65	0.703333	0.716667	0.606667	0.72	0.52	0.0666667	0.13	0.133333	0.0933333	0.113333	0.05	0.1	0.126667	0.136667	0.11	0.0933333	0.12	0.0833333	0.09	0.126667	0.13	0.27	0.08	0.0966667	0.08	0.0766667	0.11	0.0666667	0.0833333	0.08	0.11	0.08	0.106667	0.14	0.156667	0.133333	0.0866667	0.0766667	0.0766667	0.14	0.153333	0.116667	0.07
A*02:84	0.76	0.813333	0.753333	0.71	0.786667	0.68	0.733333	0.746667	0.636667	0.75	0.55	0.0766667	0.113333	0.143333	0.103333	0.0966667	0.06	0.11	0.11	0.146667	0.12	0.103333	0.13	0.0666667	0.1	0.11	0.14	0.316667	0.09	0.106667	0.09	0.0866667	0.12	0.0766667	0.0933333	0.09	0.12	0.09	0.116667	0.15	0.166667	0.18	0.0966667	0.0866667	0.123333	0.123333	0.163333	0.126667	0.08
A*02:85	0.75	0.816667	0.743333	0.7	0.776667	0.67	0.723333	0.736667	0.626667	0.74	0.54	0.05	0.113333	0.106667	0.0766667	0.126667	0.0633333	0.0833333	0.14	0.15	0.0933333	0.0766667	0.103333	0.0966667	0.0733333	0.11	0.113333	0.29	0.0633333	0.08	0.0633333	0.05	0.0933333	0.08	0.0666667	0.0633333	0.0933333	0.0633333	0.09	0.123333	0.13	0.153333	0.07	0.06	0.126667	0.123333	0.136667	0.1	0.0833333
A*02:86	0.716667	0.783333	0.71	0.666667	0.743333	0.636667	0.69	0.703333	0.593333	0.706667	0.506667	0.0533333	0.116667	0.12	0.08	0.13	0.0666667	0.0866667	0.143333	0.153333	0.0966667	0.08	0.106667	0.1	0.0766667	0.113333	0.116667	0.256667	0.0666667	0.0833333	0.0666667	0.0633333	0.0966667	0.0833333	0.07	0.0666667	0.0966667	0.0666667	0.0933333	0.126667	0.143333	0.12	0.0733333	0.0633333	0.0933333	0.126667	0.14	0.103333	0.0866667
A*02:87	0.863333	0.93	0.856667	0.813333	0.89	0.783333	0.836667	0.85	0.74	0.853333	0.653333	0.25	0.313333	0.316667	0.276667	0.326667	0.263333	0.283333	0.34	0.35	0.246667	0.276667	0.303333	0.296667	0.273333	0.31	0.313333	0.49	0.263333	0.28	0.263333	0.26	0.293333	0.28	0.266667	0.263333	0.293333	0.263333	0.243333	0.323333	0.34	0.353333	0.27	0.26	0.326667	0.323333	0.29	0.3	0.283333
A*02:90	0.716667	0.783333	0.71	0.666667	0.743333	0.636667	0.69	0.703333	0.593333	0.706667	0.506667	0.0633333	0.126667	0.13	0.09	0.14	0.0766667	0.0966667	0.153333	0.163333	0.06	0.09	0.116667	0.11	0.0866667	0.123333	0.126667	0.303333	0.0766667	0.0933333	0.0766667	0.0733333	0.106667	0.0933333	0.08	0.0766667	0.106667	0.0766667	0.0566667	0.136667	0.153333	0.166667	0.0833333	0.0733333	0.14	0.136667	0.103333	0.113333	0.0966667
A*02:93	0.666667	0.733333	0.66	0.616667	0.693333	0.586667	0.64	0.653333	0.543333	0.656667	0.456667	0.12	0.183333	0.186667	0.146667	0.196667	0.133333	0.153333	0.21	0.103333	0.163333	0.146667	0.173333	0.166667	0.143333	0.18	0.183333	0.36	0.133333	0.15	0.133333	0.13	0.163333	0.15	0.136667	0.133333	0.163333	0.133333	0.16	0.193333	0.21	0.106667	0.14	0.13	0.196667	0.193333	0.206667	0.17	0.153333
A*02:102	0.723333	0.79	0.716667	0.723333	0.75	0.68	0.696667	0.71	0.6	0.75	0.513333	0.0833333	0.03	0.07	0.11	0.0433333	0.0966667	0.116667	0.0566667	0.183333	0.126667	0.0966667	0.123333	0.0933333	0.106667	0.106667	0.146667	0.31	0.0966667	0.0333333	0.0966667	0.0933333	0.113333	0.113333	0.1	0.0966667	0.126667	0.0966667	0.123333	0.156667	0.16	0.186667	0.103333	0.0933333	0.146667	0.04	0.17	0.0833333	0.116667
A*02:105	0.75	0.816667	0.743333	0.7	0.776667	0.67	0.723333	0.736667	0.626667	0.74	0.553333	0.0633333	0.126667	0.13	0.09	0.14	0.0766667	0.0966667	0.153333	0.163333	0.106667	0.09	0.116667	0.11	0.0866667	0.123333	0.126667	0.303333	0.0766667	0.0933333	0.0766667	0.0733333	0.106667	0.0933333	0.08	0.0766667	0.106667	0.0766667	0.103333	0.136667	0.153333	0.166667	0.0833333	0.0733333	0.14	0.136667	0.15	0.113333	0.0966667
A*02:110	0.7	0.766667	0.673333	0.65	0.726667	0.62	0.673333	0.686667	0.576667	0.69	0.49	0.166667	0.193333	0.233333	0.133333	0.206667	0.18	0.203333	0.22	0.12	0.21	0.193333	0.22	0.176667	0.19	0.1	0.233333	0.406667	0.18	0.196667	0.18	0.176667	0.21	0.196667	0.183333	0.18	0.193333	0.18	0.206667	0.24	0.256667	0.123333	0.186667	0.176667	0.243333	0.203333	0.253333	0.216667	0.2
A*02:115	0.76	0.826667	0.753333	0.76	0.786667	0.716667	0.733333	0.746667	0.636667	0.786667	0.55	0.12	0.03	0.106667	0.146667	0.0433333	0.133333	0.153333	0.0566667	0.22	0.163333	0.133333	0.16	0.0933333	0.143333	0.143333	0.183333	0.346667	0.133333	0.07	0.133333	0.13	0.15	0.15	0.136667	0.133333	0.163333	0.133333	0.16	0.193333	0.196667	0.223333	0.14	0.13	0.183333	0.04	0.206667	0.12	0.153333
A*02:119	0.756667	0.823333	0.75	0.706667	0.783333	0.676667	0.73	0.743333	0.633333	0.746667	0.546667	0.0566667	0.12	0.123333	0.0833333	0.133333	0.07	0.09	0.146667	0.156667	0.1	0.0833333	0.11	0.103333	0.08	0.116667	0.12	0.296667	0.07	0.0866667	0.07	0.0666667	0.1	0.07	0.0733333	0.07	0.1	0.07	0.0966667	0.13	0.146667	0.16	0.0766667	0.0666667	0.133333	0.13	0.143333	0.106667	0.09
A*02:122	0.676667	0.73	0.67	0.676667	0.703333	0.633333	0.65	0.663333	0.553333	0.703333	0.466667	0.196667	0.17	0.183333	0.223333	0.153333	0.18	0.23	0.166667	0.15	0.24	0.21	0.236667	0.203333	0.22	0.246667	0.26	0.423333	0.21	0.146667	0.21	0.206667	0.226667	0.196667	0.213333	0.21	0.24	0.21	0.236667	0.27	0.273333	0.183333	0.216667	0.206667	0.23	0.18	0.283333	0.196667	0.2
A*02:123	0.776667	0.803333	0.77	0.726667	0.803333	0.696667	0.75	0.763333	0.653333	0.766667	0.566667	0.0766667	0.14	0.143333	0.103333	0.153333	0.09	0.11	0.166667	0.176667	0.12	0.103333	0.13	0.123333	0.1	0.136667	0.14	0.316667	0.09	0.106667	0.09	0.0866667	0.12	0.106667	0.0933333	0.09	0.12	0.09	0.116667	0.15	0.166667	0.18	0.0966667	0.0866667	0.153333	0.15	0.163333	0.126667	0.11
A*02:128	0.72	0.786667	0.713333	0.67	0.746667	0.64	0.693333	0.706667	0.596667	0.71	0.51	0.0933333	0.156667	0.16	0.12	0.17	0.106667	0.126667	0.156667	0.193333	0.0533333	0.12	0.146667	0.14	0.116667	0.153333	0.156667	0.333333	0.08	0.123333	0.106667	0.103333	0.136667	0.123333	0.1	0.106667	0.136667	0.106667	0.0866667	0.166667	0.183333	0.196667	0.113333	0.103333	0.17	0.166667	0.133333	0.143333	0.126667
A*02:136	0.843333	0.91	0.836667	0.843333	0.87	0.8	0.816667	0.83	0.72	0.87	0.633333	0.28	0.263333	0.266667	0.306667	0.276667	0.293333	0.313333	0.29	0.38	0.276667	0.293333	0.32	0.326667	0.303333	0.34	0.343333	0.506667	0.293333	0.23	0.293333	0.29	0.31	0.31	0.296667	0.293333	0.323333	0.293333	0.273333	0.353333	0.356667	0.383333	0.3	0.29	0.343333	0.273333	0.32	0.28	0.313333
A*02:145	0.75	0.816667	0.743333	0.7	0.776667	0.67	0.723333	0.736667	0.626667	0.74	0.54	0.05	0.113333	0.116667	0.0766667	0.126667	0.0633333	0.0833333	0.14	0.15	0.0933333	0.0766667	0.103333	0.0966667	0.0733333	0.11	0.113333	0.29	0.0633333	0.08	0.0633333	0.06	0.0933333	0.08	0.0666667	0.0633333	0.0933333	0.0633333	0.09	0.123333	0.14	0.153333	0.07	0.06	0.126667	0.123333	0.136667	0.1	0.0833333
A*02:146	0.696667	0.763333	0.69	0.646667	0.723333	0.616667	0.67	0.683333	0.573333	0.686667	0.486667	0.0866667	0.15	0.153333	0.113333	0.163333	0.1	0.12	0.176667	0.186667	0.0833333	0.113333	0.14	0.133333	0.11	0.146667	0.15	0.326667	0.1	0.116667	0.1	0.0966667	0.13	0.116667	0.103333	0.1	0.13	0.1	0.08	0.16	0.176667	0.19	0.106667	0.0966667	0.163333	0.16	0.126667	0.136667	0.12
A*02:147	0.786667	0.853333	0.78	0.736667	0.813333	0.706667	0.76	0.773333	0.663333	0.776667	0.586667	0.0966667	0.16	0.163333	0.123333	0.173333	0.11	0.13	0.186667	0.196667	0.14	0.123333	0.15	0.143333	0.12	0.156667	0.16	0.336667	0.11	0.126667	0.11	0.106667	0.14	0.126667	0.113333	0.11	0.14	0.11	0.136667	0.17	0.186667	0.2	0.116667	0.106667	0.173333	0.17	0.183333	0.146667	0.13
A*02:148	0.743333	0.81	0.736667	0.743333	0.77	0.726667	0.716667	0.73	0.62	0.77	0.533333	0.12	0.103333	0.03	0.146667	0.116667	0.133333	0.156667	0.13	0.19	0.163333	0.133333	0.106667	0.166667	0.143333	0.15	0.186667	0.346667	0.133333	0.07	0.133333	0.106667	0.123333	0.15	0.136667	0.133333	0.146667	0.133333	0.16	0.193333	0.12	0.193333	0.14	0.13	0.183333	0.113333	0.206667	0.12	0.153333
A*02:169	0.706667	0.76	0.7	0.656667	0.733333	0.626667	0.68	0.693333	0.583333	0.696667	0.496667	0.09	0.153333	0.156667	0.116667	0.136667	0.0733333	0.123333	0.123333	0.16	0.133333	0.116667	0.143333	0.106667	0.113333	0.15	0.153333	0.33	0.0766667	0.12	0.103333	0.1	0.133333	0.09	0.0966667	0.103333	0.133333	0.103333	0.13	0.163333	0.18	0.193333	0.11	0.1	0.136667	0.163333	0.14	0.14	0.0933333
A*02:177	0.75	0.816667	0.743333	0.7	0.776667	0.67	0.723333	0.736667	0.626667	0.74	0.54	0.05	0.113333	0.116667	0.0766667	0.126667	0.0633333	0.0833333	0.14	0.15	0.0933333	0.0766667	0.103333	0.0966667	0.0733333	0.11	0.113333	0.29	0.0633333	0.08	0.0633333	0.06	0.0933333	0.08	0.0666667	0.0633333	0.0933333	0.0633333	0.09	0.123333	0.14	0.153333	0.07	0.06	0.126667	0.123333	0.136667	0.1	0.0833333
A*02:183	0.753333	0.82	0.746667	0.703333	0.78	0.673333	0.726667	0.74	0.63	0.743333	0.543333	0.0533333	0.116667	0.12	0.08	0.13	0.0666667	0.0866667	0.143333	0.153333	0.0966667	0.08	0.106667	0.1	0.0766667	0.113333	0.116667	0.293333	0.0666667	0.0833333	0.0666667	0.0633333	0.0966667	0.0833333	0.07	0.0666667	0.0966667	0.0666667	0.0933333	0.126667	0.143333	0.156667	0.0733333	0.0633333	0.13	0.126667	0.14	0.103333	0.0866667
A*02:191	0.75	0.816667	0.743333	0.75	0.776667	0.706667	0.723333	0.736667	0.626667	0.776667	0.54	0.1	0.0833333	0.0866667	0.126667	0.0966667	0.113333	0.0666667	0.11	0.203333	0.143333	0.113333	0.14	0.146667	0.123333	0.163333	0.0966667	0.326667	0.113333	0.05	0.113333	0.11	0.13	0.13	0.116667	0.113333	0.1	0.113333	0.14	0.173333	0.176667	0.206667	0.12	0.11	0.163333	0.0933333	0.186667	0.1	0.133333
A*02:193	0.746667	0.813333	0.74	0.696667	0.773333	0.666667	0.72	0.733333	0.623333	0.736667	0.536667	0.0466667	0.11	0.113333	0.0733333	0.123333	0.06	0.08	0.136667	0.146667	0.09	0.0733333	0.1	0.0933333	0.07	0.106667	0.11	0.286667	0.06	0.0766667	0.06	0.0566667	0.09	0.0766667	0.0633333	0.06	0.09	0.06	0.0866667	0.12	0.136667	0.15	0.0666667	0.0566667	0.123333	0.12	0.133333	0.0966667	0.08
A*02:194	0.753333	0.82	0.746667	0.703333	0.78	0.673333	0.726667	0.74	0.63	0.743333	0.543333	0.0533333	0.116667	0.12	0.08	0.13	0.0666667	0.0866667	0.143333	0.153333	0.0966667	0.08	0.106667	0.1	0.0766667	0.113333	0.116667	0.293333	0.0666667	0.0833333	0.0666667	0.0633333	0.0966667	0.0833333	0.07	0.0666667	0.0966667	0.0666667	0.0933333	0.126667	0.143333	0.156667	0.0733333	0.0633333	0.13	0.126667	0.14	0.103333	0.0866667
A*02:195	0.693333	0.76	0.686667	0.643333	0.72	0.613333	0.666667	0.68	0.57	0.683333	0.483333	0.0766667	0.14	0.143333	0.103333	0.153333	0.09	0.11	0.14	0.176667	0.12	0.103333	0.13	0.123333	0.1	0.136667	0.14	0.316667	0.0633333	0.106667	0.09	0.0866667	0.12	0.106667	0.0833333	0.09	0.12	0.09	0.116667	0.15	0.166667	0.18	0.0966667	0.0866667	0.153333	0.15	0.126667	0.126667	0.11
A*02:210	0.746667	0.813333	0.74	0.696667	0.773333	0.666667	0.72	0.733333	0.623333	0.736667	0.536667	0.0466667	0.11	0.113333	0.0733333	0.123333	0.06	0.08	0.136667	0.146667	0.09	0.0733333	0.1	0.0933333	0.07	0.106667	0.11	0.286667	0.06	0.0766667	0.06	0.0566667	0.09	0.0766667	0.0633333	0.06	0.09	0.06	0.0866667	0.12	0.136667	0.15	0.0666667	0.0566667	0.123333	0.12	0.133333	0.0966667	0.08
A*02:211	0.753333	0.82	0.746667	0.703333	0.78	0.673333	0.726667	0.74	0.63	0.743333	0.543333	0.0533333	0.116667	0.12	0.08	0.13	0.0666667	0.0866667	0.143333	0.153333	0.0966667	0.08	0.106667	0.1	0.0766667	0.113333	0.116667	0.293333	0.0666667	0.0833333	0.0666667	0.0633333	0.0966667	0.0833333	0.07	0.0666667	0.0966667	0.0666667	0.0933333	0.126667	0.143333	0.156667	0.0733333	0.0633333	0.13	0.126667	0.14	0.103333	0.0866667
A*02:212	0.77	0.836667	0.763333	0.72	0.796667	0.69	0.743333	0.756667	0.646667	0.76	0.56	0.07	0.133333	0.136667	0.0966667	0.146667	0.0833333	0.103333	0.16	0.17	0.113333	0.0966667	0.123333	0.116667	0.0933333	0.13	0.133333	0.31	0.0833333	0.1	0.0833333	0.08	0.113333	0.1	0.0866667	0.0833333	0.113333	0.0833333	0.11	0.143333	0.16	0.173333	0.09	0.08	0.146667	0.143333	0.156667	0.12	0.103333
A*02:213	0.763333	0.83	0.756667	0.713333	0.79	0.683333	0.736667	0.75	0.64	0.753333	0.553333	0.0633333	0.126667	0.13	0.09	0.14	0.0766667	0.0966667	0.153333	0.163333	0.106667	0.09	0.116667	0.11	0.0866667	0.123333	0.126667	0.303333	0.0766667	0.0933333	0.0766667	0.0733333	0.106667	0.0933333	0.08	0.0766667	0.106667	0.0766667	0.103333	0.136667	0.153333	0.166667	0.0833333	0.0733333	0.14	0.136667	0.15	0.113333	0.0966667
A*02:230	0.736667	0.803333	0.73	0.736667	0.763333	0.72	0.71	0.723333	0.613333	0.763333	0.526667	0.113333	0.0966667	0.0233333	0.14	0.11	0.126667	0.146667	0.123333	0.213333	0.156667	0.126667	0.1	0.16	0.136667	0.173333	0.176667	0.34	0.126667	0.0633333	0.126667	0.1	0.116667	0.143333	0.13	0.126667	0.156667	0.126667	0.153333	0.186667	0.113333	0.216667	0.133333	0.123333	0.176667	0.106667	0.2	0.113333	0.146667
A*02:258	0.753333	0.82	0.746667	0.753333	0.78	0.736667	0.726667	0.74	0.63	0.78	0.543333	0.13	0.113333	0.04	0.156667	0.126667	0.143333	0.163333	0.14	0.23	0.173333	0.143333	0.116667	0.176667	0.153333	0.19	0.193333	0.356667	0.143333	0.08	0.143333	0.116667	0.133333	0.16	0.146667	0.143333	0.173333	0.143333	0.17	0.203333	0.13	0.233333	0.15	0.14	0.193333	0.123333	0.216667	0.13	0.163333
A*02:267	0.713333	0.78	0.706667	0.713333	0.74	0.7	0.686667	0.7	0.59	0.74	0.503333	0.0933333	0.0766667	0.03	0.12	0.09	0.106667	0.126667	0.103333	0.193333	0.136667	0.106667	0.106667	0.14	0.116667	0.153333	0.156667	0.32	0.106667	0.0433333	0.106667	0.08	0.0933333	0.123333	0.11	0.106667	0.136667	0.106667	0.133333	0.166667	0.12	0.196667	0.113333	0.103333	0.156667	0.0866667	0.18	0.0933333	0.126667
A*02:268	0.74	0.806667	0.713333	0.69	0.766667	0.66	0.713333	0.726667	0.616667	0.73	0.53	0.08	0.143333	0.146667	0.0466667	0.156667	0.0933333	0.116667	0.17	0.15	0.123333	0.106667	0.133333	0.126667	0.103333	0.05	0.146667	0.32	0.0933333	0.11	0.0933333	0.09	0.123333	0.11	0.0966667	0.0933333	0.106667	0.0933333	0.12	0.153333	0.17	0.153333	0.1	0.09	0.156667	0.153333	0.166667	0.13	0.113333
A*02:279	0.61	0.676667	0.603333	0.56	0.636667	0.53	0.583333	0.596667	0.486667	0.6	0.526667	0.19	0.253333	0.256667	0.216667	0.266667	0.203333	0.223333	0.28	0.173333	0.233333	0.216667	0.243333	0.236667	0.213333	0.25	0.253333	0.43	0.203333	0.22	0.203333	0.2	0.233333	0.22	0.206667	0.203333	0.233333	0.203333	0.23	0.263333	0.28	0.176667	0.21	0.2	0.266667	0.263333	0.276667	0.24	0.223333
A*02:280	0.726667	0.793333	0.72	0.723333	0.753333	0.666667	0.7	0.713333	0.603333	0.71	0.516667	0.1	0.15	0.0766667	0.126667	0.163333	0.113333	0.133333	0.176667	0.2	0.143333	0.0733333	0.0466667	0.146667	0.123333	0.16	0.163333	0.286667	0.113333	0.116667	0.113333	0.0866667	0.0633333	0.13	0.116667	0.113333	0.143333	0.113333	0.14	0.173333	0.06	0.203333	0.12	0.11	0.123333	0.16	0.186667	0.103333	0.133333
A*02:281	0.743333	0.81	0.736667	0.743333	0.77	0.726667	0.716667	0.73	0.62	0.77	0.533333	0.12	0.103333	0.03	0.146667	0.116667	0.133333	0.153333	0.13	0.22	0.163333	0.133333	0.106667	0.166667	0.143333	0.18	0.183333	0.346667	0.133333	0.07	0.133333	0.106667	0.123333	0.15	0.136667	0.133333	0.163333	0.133333	0.16	0.193333	0.12	0.223333	0.14	0.13	0.183333	0.113333	0.206667	0.12	0.153333
A*02:282	0.723333	0.79	0.716667	0.673333	0.75	0.643333	0.696667	0.71	0.6	0.713333	0.513333	0.14	0.203333	0.206667	0.166667	0.216667	0.153333	0.106667	0.23	0.126667	0.183333	0.166667	0.193333	0.186667	0.163333	0.203333	0.136667	0.38	0.153333	0.17	0.153333	0.15	0.183333	0.17	0.156667	0.153333	0.14	0.153333	0.18	0.213333	0.23	0.13	0.16	0.15	0.216667	0.213333	0.226667	0.19	0.173333
A*02:297	0.773333	0.84	0.766667	0.723333	0.8	0.693333	0.746667	0.76	0.65	0.763333	0.563333	0.12	0.183333	0.186667	0.146667	0.196667	0.133333	0.153333	0.21	0.22	0.08	0.146667	0.173333	0.166667	0.143333	0.18	0.183333	0.36	0.133333	0.15	0.133333	0.13	0.163333	0.15	0.136667	0.133333	0.163333	0.133333	0.113333	0.193333	0.21	0.223333	0.14	0.13	0.196667	0.193333	0.16	0.17	0.153333
A*02:303	0.766667	0.833333	0.74	0.716667	0.793333	0.686667	0.74	0.753333	0.643333	0.756667	0.556667	0.116667	0.143333	0.183333	0.0833333	0.156667	0.13	0.153333	0.17	0.186667	0.16	0.143333	0.17	0.126667	0.14	0.05	0.183333	0.356667	0.13	0.146667	0.13	0.126667	0.16	0.146667	0.133333	0.13	0.143333	0.13	0.156667	0.19	0.206667	0.19	0.136667	0.126667	0.193333	0.153333	0.203333	0.166667	0.15
A*03:01	0.333333	0.4	0.35	0.283333	0.36	0.28	0.306667	0.32	0.51	0.323333	0.55	0.516667	0.57	0.53	0.503333	0.583333	0.53	0.55	0.57	0.5	0.513333	0.543333	0.516667	0.553333	0.54	0.526667	0.58	0.503333	0.503333	0.546667	0.503333	0.526667	0.533333	0.546667	0.523333	0.53	0.56	0.506667	0.486667	0.59	0.553333	0.466667	0.536667	0.526667	0.516667	0.58	0.52	0.566667	0.55
A*03:02	0.313333	0.38	0.33	0.31	0.34	0.226667	0.286667	0.3	0.49	0.296667	0.53	0.516667	0.556667	0.57	0.503333	0.57	0.53	0.55	0.556667	0.5	0.513333	0.49	0.516667	0.553333	0.54	0.526667	0.58	0.45	0.503333	0.533333	0.503333	0.526667	0.506667	0.546667	0.523333	0.53	0.56	0.506667	0.486667	0.59	0.553333	0.466667	0.536667	0.526667	0.463333	0.566667	0.52	0.52	0.55
A*03:04	0.38	0.446667	0.396667	0.33	0.406667	0.326667	0.353333	0.366667	0.556667	0.37	0.596667	0.563333	0.616667	0.576667	0.55	0.63	0.576667	0.596667	0.616667	0.546667	0.56	0.59	0.563333	0.6	0.586667	0.573333	0.626667	0.55	0.55	0.593333	0.55	0.573333	0.58	0.593333	0.57	0.576667	0.606667	0.553333	0.533333	0.636667	0.6	0.513333	0.583333	0.573333	0.563333	0.626667	0.566667	0.613333	0.596667
A*03:05	0.33	0.396667	0.346667	0.28	0.356667	0.276667	0.303333	0.316667	0.506667	0.32	0.546667	0.513333	0.566667	0.526667	0.5	0.58	0.526667	0.546667	0.566667	0.496667	0.51	0.54	0.513333	0.55	0.536667	0.523333	0.576667	0.5	0.5	0.543333	0.5	0.523333	0.53	0.543333	0.52	0.526667	0.556667	0.503333	0.483333	0.586667	0.55	0.463333	0.533333	0.523333	0.513333	0.576667	0.516667	0.563333	0.546667
A*03:06	0.346667	0.413333	0.363333	0.296667	0.373333	0.293333	0.32	0.333333	0.523333	0.336667	0.563333	0.53	0.583333	0.543333	0.516667	0.596667	0.543333	0.563333	0.583333	0.513333	0.526667	0.556667	0.53	0.566667	0.553333	0.54	0.593333	0.516667	0.516667	0.56	0.516667	0.54	0.546667	0.56	0.536667	0.543333	0.573333	0.52	0.5	0.603333	0.566667	0.48	0.55	0.54	0.53	0.593333	0.533333	0.58	0.563333
A*03:07	0.333333	0.4	0.35	0.283333	0.36	0.253333	0.306667	0.32	0.51	0.323333	0.55	0.49	0.543333	0.556667	0.476667	0.556667	0.503333	0.523333	0.543333	0.473333	0.486667	0.516667	0.543333	0.526667	0.513333	0.5	0.553333	0.476667	0.476667	0.52	0.476667	0.5	0.533333	0.52	0.496667	0.503333	0.533333	0.48	0.46	0.563333	0.58	0.44	0.51	0.5	0.49	0.553333	0.493333	0.54	0.523333
A*03:08	0.32	0.386667	0.336667	0.27	0.346667	0.266667	0.293333	0.306667	0.496667	0.31	0.536667	0.503333	0.556667	0.516667	0.49	0.57	0.516667	0.536667	0.556667	0.486667	0.5	0.53	0.503333	0.54	0.526667	0.513333	0.566667	0.49	0.49	0.533333	0.49	0.513333	0.52	0.533333	0.51	0.516667	0.546667	0.516667	0.496667	0.576667	0.54	0.453333	0.523333	0.513333	0.503333	0.566667	0.506667	0.553333	0.536667
A*03:09	0.353333	0.42	0.37	0.303333	0.38	0.3	0.326667	0.34	0.53	0.343333	0.57	0.49	0.543333	0.503333	0.476667	0.556667	0.503333	0.523333	0.543333	0.473333	0.533333	0.516667	0.49	0.526667	0.513333	0.5	0.553333	0.476667	0.476667	0.52	0.476667	0.5	0.506667	0.52	0.496667	0.503333	0.533333	0.48	0.506667	0.563333	0.526667	0.44	0.51	0.5	0.49	0.553333	0.54	0.54	0.523333
A*03:24	0.523333	0.59	0.54	0.473333	0.55	0.47	0.496667	0.51	0.4	0.513333	0.44	0.396667	0.45	0.41	0.383333	0.463333	0.41	0.43	0.45	0.38	0.393333	0.423333	0.396667	0.433333	0.42	0.406667	0.46	0.56	0.383333	0.426667	0.383333	0.406667	0.413333	0.426667	0.403333	0.41	0.44	0.386667	0.366667	0.47	0.433333	0.346667	0.416667	0.406667	0.396667	0.46	0.41	0.446667	0.43
A*03:40	0.506667	0.573333	0.523333	0.456667	0.533333	0.453333	0.48	0.493333	0.383333	0.496667	0.423333	0.39	0.443333	0.403333	0.376667	0.456667	0.403333	0.423333	0.443333	0.373333	0.386667	0.416667	0.39	0.426667	0.413333	0.4	0.453333	0.553333	0.376667	0.42	0.376667	0.4	0.406667	0.42	0.396667	0.403333	0.433333	0.38	0.36	0.463333	0.426667	0.34	0.41	0.4	0.39	0.453333	0.393333	0.44	0.423333
A*03:57	0.313333	0.38	0.33	0.263333	0.34	0.26	0.286667	0.3	0.49	0.303333	0.53	0.54	0.593333	0.553333	0.526667	0.606667	0.553333	0.573333	0.593333	0.523333	0.536667	0.566667	0.54	0.576667	0.563333	0.55	0.603333	0.526667	0.526667	0.57	0.526667	0.55	0.556667	0.57	0.546667	0.553333	0.583333	0.53	0.51	0.613333	0.576667	0.49	0.56	0.55	0.54	0.603333	0.543333	0.59	0.573333
A*03:98	0.486667	0.553333	0.503333	0.436667	0.513333	0.46	0.486667	0.473333	0.363333	0.476667	0.403333	0.396667	0.45	0.41	0.383333	0.463333	0.41	0.43	0.45	0.38	0.393333	0.423333	0.396667	0.433333	0.406667	0.406667	0.46	0.56	0.383333	0.426667	0.383333	0.406667	0.413333	0.426667	0.403333	0.41	0.44	0.386667	0.366667	0.47	0.406667	0.346667	0.416667	0.406667	0.396667	0.46	0.4	0.446667	0.43
A*03:105	0.46	0.526667	0.476667	0.41	0.486667	0.466667	0.493333	0.446667	0.336667	0.45	0.376667	0.403333	0.456667	0.416667	0.39	0.47	0.416667	0.436667	0.456667	0.386667	0.4	0.43	0.403333	0.44	0.403333	0.413333	0.466667	0.566667	0.39	0.433333	0.39	0.413333	0.42	0.433333	0.41	0.416667	0.446667	0.393333	0.373333	0.476667	0.38	0.353333	0.423333	0.413333	0.403333	0.466667	0.406667	0.453333	0.436667
A*11:01	0.233333	0.286667	0.25	0.23	0.26	0.236667	0.266667	0.22	0.41	0.216667	0.45	0.6	0.64	0.626667	0.586667	0.623333	0.583333	0.633333	0.61	0.553333	0.596667	0.573333	0.573333	0.606667	0.6	0.61	0.663333	0.533333	0.586667	0.616667	0.586667	0.61	0.56	0.6	0.606667	0.613333	0.643333	0.59	0.57	0.673333	0.55	0.55	0.62	0.61	0.516667	0.65	0.603333	0.603333	0.603333
A*11:02	0.253333	0.306667	0.27	0.25	0.28	0.256667	0.286667	0.24	0.43	0.236667	0.47	0.62	0.66	0.646667	0.606667	0.643333	0.603333	0.653333	0.63	0.573333	0.616667	0.593333	0.593333	0.626667	0.62	0.63	0.683333	0.553333	0.606667	0.636667	0.606667	0.63	0.58	0.62	0.626667	0.633333	0.663333	0.61	0.59	0.693333	0.57	0.57	0.64	0.63	0.536667	0.67	0.623333	0.623333	0.623333
A*11:03	0.266667	0.32	0.283333	0.263333	0.293333	0.266667	0.3	0.253333	0.443333	0.25	0.483333	0.63	0.67	0.63	0.616667	0.653333	0.613333	0.663333	0.64	0.583333	0.626667	0.603333	0.576667	0.636667	0.63	0.64	0.693333	0.563333	0.616667	0.646667	0.616667	0.64	0.593333	0.63	0.636667	0.643333	0.673333	0.62	0.6	0.703333	0.553333	0.58	0.61	0.64	0.546667	0.68	0.633333	0.633333	0.593333
A*11:04	0.266667	0.32	0.283333	0.263333	0.293333	0.21	0.24	0.253333	0.443333	0.25	0.483333	0.573333	0.613333	0.6	0.56	0.596667	0.556667	0.606667	0.583333	0.526667	0.57	0.546667	0.546667	0.58	0.596667	0.583333	0.636667	0.506667	0.56	0.59	0.56	0.583333	0.533333	0.573333	0.58	0.586667	0.616667	0.563333	0.543333	0.646667	0.583333	0.523333	0.593333	0.583333	0.49	0.623333	0.576667	0.576667	0.576667
A*11:05	0.263333	0.316667	0.28	0.26	0.29	0.266667	0.296667	0.25	0.423333	0.246667	0.463333	0.613333	0.653333	0.64	0.6	0.636667	0.596667	0.646667	0.623333	0.566667	0.61	0.586667	0.586667	0.62	0.613333	0.623333	0.676667	0.546667	0.6	0.63	0.6	0.623333	0.573333	0.613333	0.62	0.626667	0.656667	0.603333	0.583333	0.686667	0.563333	0.563333	0.633333	0.623333	0.53	0.663333	0.616667	0.616667	0.616667
A*11:07	0.26	0.313333	0.276667	0.256667	0.286667	0.263333	0.293333	0.246667	0.436667	0.243333	0.476667	0.626667	0.666667	0.653333	0.613333	0.65	0.61	0.66	0.636667	0.58	0.623333	0.6	0.6	0.633333	0.626667	0.636667	0.69	0.56	0.613333	0.643333	0.613333	0.636667	0.586667	0.626667	0.633333	0.64	0.67	0.616667	0.596667	0.7	0.576667	0.576667	0.646667	0.636667	0.543333	0.676667	0.63	0.63	0.63
A*11:08	0.226667	0.28	0.243333	0.253333	0.253333	0.263333	0.26	0.213333	0.403333	0.246667	0.443333	0.62	0.623333	0.583333	0.606667	0.606667	0.603333	0.653333	0.593333	0.573333	0.616667	0.6	0.573333	0.626667	0.62	0.63	0.683333	0.56	0.606667	0.6	0.606667	0.63	0.59	0.62	0.626667	0.633333	0.663333	0.61	0.59	0.693333	0.55	0.57	0.64	0.63	0.543333	0.633333	0.623333	0.593333	0.623333
A*11:09	0.243333	0.296667	0.26	0.24	0.27	0.246667	0.276667	0.23	0.42	0.226667	0.46	0.61	0.65	0.636667	0.596667	0.633333	0.593333	0.643333	0.62	0.563333	0.606667	0.583333	0.583333	0.616667	0.61	0.62	0.673333	0.543333	0.596667	0.626667	0.596667	0.62	0.57	0.61	0.616667	0.623333	0.653333	0.6	0.58	0.683333	0.56	0.56	0.63	0.62	0.526667	0.66	0.613333	0.613333	0.613333
A*11:11	0.43	0.483333	0.446667	0.426667	0.456667	0.433333	0.463333	0.416667	0.306667	0.413333	0.346667	0.48	0.52	0.506667	0.466667	0.503333	0.463333	0.513333	0.49	0.433333	0.476667	0.453333	0.453333	0.486667	0.48	0.49	0.543333	0.59	0.466667	0.496667	0.466667	0.49	0.44	0.48	0.486667	0.493333	0.523333	0.47	0.45	0.553333	0.43	0.43	0.5	0.49	0.396667	0.53	0.496667	0.483333	0.483333
A*11:12	0.253333	0.306667	0.27	0.25	0.28	0.256667	0.286667	0.24	0.43	0.236667	0.47	0.583333	0.623333	0.61	0.57	0.606667	0.566667	0.616667	0.593333	0.536667	0.58	0.556667	0.556667	0.59	0.583333	0.593333	0.646667	0.516667	0.57	0.6	0.57	0.593333	0.543333	0.583333	0.59	0.596667	0.626667	0.573333	0.553333	0.656667	0.533333	0.533333	0.603333	0.593333	0.5	0.633333	0.586667	0.586667	0.586667
A*11:15	0.41	0.463333	0.426667	0.406667	0.436667	0.413333	0.443333	0.396667	0.286667	0.393333	0.326667	0.476667	0.516667	0.503333	0.463333	0.5	0.46	0.51	0.486667	0.43	0.473333	0.45	0.45	0.483333	0.476667	0.486667	0.54	0.586667	0.463333	0.493333	0.463333	0.486667	0.436667	0.476667	0.483333	0.49	0.52	0.466667	0.446667	0.55	0.426667	0.426667	0.496667	0.486667	0.393333	0.526667	0.48	0.48	0.48
A*11:18	0.26	0.313333	0.276667	0.256667	0.286667	0.263333	0.293333	0.246667	0.436667	0.243333	0.476667	0.543333	0.583333	0.57	0.53	0.566667	0.526667	0.576667	0.553333	0.496667	0.586667	0.516667	0.516667	0.55	0.543333	0.553333	0.606667	0.476667	0.53	0.56	0.53	0.553333	0.503333	0.543333	0.55	0.556667	0.586667	0.556667	0.583333	0.616667	0.493333	0.493333	0.563333	0.553333	0.46	0.593333	0.593333	0.546667	0.546667
A*11:19	0.22	0.273333	0.236667	0.216667	0.246667	0.223333	0.253333	0.206667	0.396667	0.203333	0.436667	0.586667	0.626667	0.613333	0.573333	0.61	0.57	0.62	0.596667	0.54	0.583333	0.56	0.56	0.593333	0.586667	0.596667	0.65	0.52	0.573333	0.603333	0.573333	0.596667	0.546667	0.586667	0.593333	0.6	0.63	0.6	0.58	0.66	0.536667	0.536667	0.606667	0.596667	0.503333	0.636667	0.59	0.59	0.59
A*11:20	0.33	0.383333	0.346667	0.326667	0.356667	0.33	0.363333	0.316667	0.336667	0.313333	0.376667	0.523333	0.563333	0.523333	0.51	0.546667	0.506667	0.556667	0.533333	0.476667	0.52	0.496667	0.47	0.53	0.523333	0.533333	0.586667	0.503333	0.51	0.54	0.51	0.533333	0.486667	0.523333	0.53	0.536667	0.566667	0.513333	0.493333	0.596667	0.446667	0.473333	0.543333	0.533333	0.44	0.573333	0.526667	0.526667	0.526667
A*11:24	0.413333	0.466667	0.43	0.363333	0.44	0.423333	0.446667	0.4	0.29	0.403333	0.33	0.433333	0.486667	0.473333	0.42	0.47	0.416667	0.466667	0.456667	0.386667	0.43	0.46	0.46	0.44	0.433333	0.443333	0.496667	0.596667	0.42	0.463333	0.42	0.443333	0.446667	0.433333	0.44	0.446667	0.476667	0.423333	0.403333	0.506667	0.436667	0.383333	0.453333	0.443333	0.403333	0.496667	0.436667	0.483333	0.436667
A*11:25	0.266667	0.32	0.283333	0.216667	0.293333	0.273333	0.3	0.253333	0.443333	0.256667	0.483333	0.583333	0.636667	0.596667	0.57	0.62	0.566667	0.616667	0.606667	0.536667	0.58	0.61	0.583333	0.59	0.583333	0.593333	0.646667	0.57	0.57	0.613333	0.57	0.593333	0.6	0.583333	0.59	0.596667	0.626667	0.573333	0.553333	0.656667	0.56	0.533333	0.603333	0.593333	0.553333	0.646667	0.586667	0.633333	0.586667
A*11:44	0.373333	0.426667	0.39	0.4	0.4	0.413333	0.406667	0.36	0.25	0.393333	0.29	0.47	0.473333	0.46	0.456667	0.456667	0.453333	0.503333	0.443333	0.423333	0.466667	0.45	0.45	0.476667	0.47	0.48	0.533333	0.586667	0.456667	0.45	0.456667	0.48	0.436667	0.47	0.476667	0.483333	0.513333	0.46	0.44	0.543333	0.426667	0.42	0.49	0.48	0.393333	0.483333	0.473333	0.443333	0.473333
A*23:01	0.79	0.79	0.763333	0.74	0.816667	0.71	0.763333	0.776667	0.843333	0.78	0.756667	0.756667	0.783333	0.823333	0.723333	0.783333	0.756667	0.793333	0.796667	0.696667	0.753333	0.783333	0.81	0.753333	0.78	0.69	0.823333	0.576667	0.77	0.786667	0.77	0.766667	0.8	0.773333	0.773333	0.77	0.783333	0.77	0.75	0.706667	0.846667	0.676667	0.736667	0.766667	0.743333	0.793333	0.683333	0.806667	0.736667
A*23:02	0.77	0.77	0.743333	0.77	0.796667	0.726667	0.743333	0.756667	0.823333	0.796667	0.736667	0.786667	0.733333	0.773333	0.753333	0.733333	0.786667	0.823333	0.746667	0.726667	0.783333	0.8	0.826667	0.783333	0.81	0.72	0.853333	0.593333	0.8	0.736667	0.8	0.796667	0.816667	0.803333	0.803333	0.8	0.813333	0.8	0.78	0.736667	0.863333	0.706667	0.766667	0.796667	0.76	0.743333	0.713333	0.786667	0.766667
A*23:03	0.823333	0.823333	0.796667	0.773333	0.85	0.743333	0.796667	0.81	0.7	0.813333	0.613333	0.64	0.666667	0.706667	0.606667	0.666667	0.64	0.676667	0.68	0.58	0.636667	0.666667	0.693333	0.636667	0.663333	0.573333	0.706667	0.68	0.653333	0.67	0.626667	0.65	0.683333	0.656667	0.656667	0.653333	0.666667	0.653333	0.633333	0.59	0.73	0.56	0.62	0.65	0.626667	0.676667	0.566667	0.69	0.62
A*23:04	0.84	0.84	0.813333	0.79	0.866667	0.76	0.813333	0.826667	0.893333	0.83	0.806667	0.683333	0.71	0.75	0.65	0.71	0.683333	0.72	0.723333	0.623333	0.68	0.71	0.736667	0.68	0.706667	0.616667	0.75	0.626667	0.696667	0.713333	0.696667	0.693333	0.726667	0.7	0.7	0.696667	0.71	0.696667	0.676667	0.756667	0.773333	0.603333	0.663333	0.693333	0.67	0.72	0.61	0.733333	0.663333
A*23:05	0.796667	0.796667	0.77	0.746667	0.823333	0.716667	0.77	0.783333	0.85	0.786667	0.763333	0.763333	0.79	0.83	0.73	0.79	0.763333	0.8	0.803333	0.703333	0.76	0.79	0.816667	0.76	0.786667	0.696667	0.83	0.583333	0.776667	0.793333	0.776667	0.773333	0.806667	0.78	0.78	0.776667	0.79	0.776667	0.756667	0.713333	0.853333	0.683333	0.743333	0.773333	0.75	0.8	0.69	0.813333	0.743333
A*23:06	0.803333	0.803333	0.776667	0.753333	0.83	0.723333	0.776667	0.79	0.856667	0.793333	0.77	0.77	0.796667	0.836667	0.736667	0.796667	0.77	0.806667	0.81	0.71	0.766667	0.796667	0.823333	0.766667	0.793333	0.703333	0.836667	0.59	0.783333	0.8	0.783333	0.78	0.813333	0.786667	0.786667	0.783333	0.796667	0.783333	0.763333	0.72	0.86	0.69	0.75	0.78	0.756667	0.806667	0.696667	0.82	0.75
A*23:13	0.803333	0.803333	0.776667	0.753333	0.83	0.723333	0.776667	0.79	0.856667	0.793333	0.77	0.77	0.796667	0.836667	0.736667	0.796667	0.77	0.806667	0.81	0.71	0.766667	0.796667	0.823333	0.766667	0.793333	0.703333	0.836667	0.59	0.783333	0.8	0.783333	0.78	0.813333	0.786667	0.786667	0.783333	0.796667	0.76	0.74	0.72	0.86	0.69	0.75	0.78	0.756667	0.806667	0.696667	0.82	0.75
A*23:15	0.803333	0.803333	0.776667	0.753333	0.83	0.723333	0.776667	0.79	0.856667	0.793333	0.77	0.77	0.796667	0.836667	0.736667	0.796667	0.77	0.806667	0.81	0.71	0.766667	0.796667	0.823333	0.766667	0.793333	0.703333	0.836667	0.59	0.783333	0.8	0.783333	0.78	0.813333	0.786667	0.786667	0.783333	0.796667	0.783333	0.763333	0.72	0.86	0.69	0.75	0.78	0.756667	0.806667	0.696667	0.82	0.75
A*23:19	0.796667	0.796667	0.77	0.746667	0.823333	0.716667	0.77	0.783333	0.85	0.786667	0.763333	0.763333	0.79	0.83	0.73	0.79	0.763333	0.8	0.803333	0.703333	0.76	0.79	0.816667	0.76	0.786667	0.696667	0.83	0.583333	0.776667	0.793333	0.776667	0.773333	0.806667	0.78	0.78	0.776667	0.79	0.776667	0.756667	0.713333	0.853333	0.683333	0.743333	0.773333	0.75	0.8	0.69	0.813333	0.743333
A*24:02	0.706667	0.706667	0.68	0.703333	0.733333	0.62	0.68	0.693333	0.76	0.69	0.673333	0.72	0.733333	0.773333	0.686667	0.733333	0.72	0.756667	0.746667	0.66	0.716667	0.693333	0.72	0.716667	0.743333	0.653333	0.786667	0.486667	0.733333	0.736667	0.733333	0.73	0.71	0.736667	0.736667	0.733333	0.746667	0.733333	0.713333	0.67	0.756667	0.64	0.74	0.73	0.653333	0.743333	0.646667	0.723333	0.74
A*24:03	0.756667	0.756667	0.73	0.753333	0.783333	0.67	0.73	0.743333	0.81	0.74	0.723333	0.646667	0.66	0.7	0.613333	0.66	0.646667	0.683333	0.673333	0.586667	0.643333	0.62	0.646667	0.643333	0.67	0.58	0.713333	0.536667	0.66	0.663333	0.66	0.656667	0.636667	0.663333	0.663333	0.66	0.673333	0.66	0.64	0.72	0.683333	0.566667	0.666667	0.656667	0.58	0.67	0.573333	0.65	0.666667
A*24:04	0.54	0.54	0.513333	0.536667	0.566667	0.453333	0.513333	0.526667	0.593333	0.523333	0.506667	0.556667	0.57	0.61	0.523333	0.57	0.556667	0.593333	0.583333	0.496667	0.553333	0.53	0.556667	0.553333	0.58	0.49	0.623333	0.323333	0.57	0.573333	0.57	0.566667	0.546667	0.573333	0.573333	0.57	0.583333	0.57	0.55	0.506667	0.593333	0.476667	0.576667	0.566667	0.49	0.58	0.483333	0.56	0.576667
A*24:05	0.723333	0.723333	0.696667	0.72	0.75	0.636667	0.696667	0.71	0.776667	0.706667	0.69	0.736667	0.75	0.79	0.703333	0.75	0.736667	0.773333	0.763333	0.676667	0.733333	0.71	0.736667	0.733333	0.76	0.67	0.803333	0.503333	0.75	0.753333	0.75	0.746667	0.726667	0.753333	0.753333	0.75	0.763333	0.75	0.73	0.686667	0.773333	0.656667	0.756667	0.746667	0.67	0.76	0.663333	0.74	0.756667
A*24:07	0.72	0.72	0.693333	0.716667	0.746667	0.633333	0.693333	0.706667	0.773333	0.703333	0.686667	0.733333	0.746667	0.786667	0.7	0.746667	0.733333	0.77	0.76	0.673333	0.73	0.706667	0.733333	0.73	0.756667	0.666667	0.8	0.5	0.746667	0.75	0.746667	0.743333	0.723333	0.75	0.75	0.746667	0.76	0.723333	0.703333	0.683333	0.77	0.653333	0.753333	0.743333	0.666667	0.756667	0.66	0.736667	0.753333
A*24:08	0.696667	0.696667	0.67	0.693333	0.723333	0.61	0.67	0.683333	0.75	0.68	0.663333	0.673333	0.686667	0.726667	0.64	0.686667	0.673333	0.71	0.7	0.613333	0.67	0.646667	0.673333	0.67	0.696667	0.606667	0.74	0.44	0.686667	0.69	0.686667	0.683333	0.663333	0.69	0.69	0.663333	0.7	0.686667	0.666667	0.623333	0.71	0.593333	0.693333	0.683333	0.606667	0.696667	0.713333	0.676667	0.693333
A*24:10	0.723333	0.723333	0.696667	0.72	0.75	0.696667	0.756667	0.71	0.776667	0.706667	0.69	0.673333	0.686667	0.726667	0.64	0.686667	0.673333	0.71	0.7	0.613333	0.67	0.646667	0.673333	0.67	0.673333	0.606667	0.74	0.563333	0.686667	0.69	0.686667	0.683333	0.663333	0.69	0.69	0.686667	0.7	0.686667	0.666667	0.746667	0.65	0.593333	0.693333	0.683333	0.606667	0.696667	0.6	0.676667	0.693333
A*24:13	0.8	0.8	0.773333	0.75	0.826667	0.72	0.773333	0.786667	0.676667	0.79	0.59	0.59	0.616667	0.656667	0.556667	0.616667	0.59	0.626667	0.63	0.53	0.586667	0.616667	0.643333	0.586667	0.613333	0.523333	0.656667	0.63	0.603333	0.62	0.603333	0.6	0.633333	0.606667	0.606667	0.603333	0.616667	0.603333	0.583333	0.54	0.68	0.51	0.61	0.6	0.576667	0.626667	0.516667	0.64	0.61
A*24:14	0.743333	0.743333	0.736667	0.74	0.77	0.656667	0.716667	0.73	0.796667	0.726667	0.71	0.59	0.64	0.643333	0.616667	0.64	0.59	0.623333	0.653333	0.676667	0.586667	0.563333	0.59	0.623333	0.613333	0.65	0.653333	0.356667	0.603333	0.606667	0.603333	0.6	0.58	0.606667	0.606667	0.603333	0.633333	0.603333	0.583333	0.54	0.626667	0.656667	0.61	0.6	0.523333	0.65	0.516667	0.593333	0.61
A*24:17	0.65	0.65	0.623333	0.646667	0.676667	0.563333	0.623333	0.636667	0.703333	0.633333	0.743333	0.79	0.803333	0.843333	0.756667	0.803333	0.79	0.826667	0.816667	0.73	0.786667	0.763333	0.79	0.786667	0.813333	0.723333	0.856667	0.556667	0.803333	0.806667	0.803333	0.8	0.78	0.806667	0.806667	0.803333	0.816667	0.803333	0.783333	0.74	0.826667	0.71	0.81	0.8	0.723333	0.813333	0.716667	0.793333	0.81
A*24:20	0.72	0.72	0.693333	0.716667	0.746667	0.633333	0.693333	0.706667	0.773333	0.703333	0.686667	0.733333	0.746667	0.786667	0.7	0.746667	0.733333	0.77	0.76	0.673333	0.73	0.706667	0.733333	0.73	0.756667	0.666667	0.8	0.5	0.746667	0.75	0.746667	0.743333	0.723333	0.75	0.75	0.723333	0.76	0.746667	0.726667	0.683333	0.77	0.653333	0.753333	0.743333	0.666667	0.756667	0.66	0.736667	0.753333
A*24:22	0.74	0.74	0.713333	0.77	0.766667	0.726667	0.713333	0.726667	0.793333	0.766667	0.706667	0.663333	0.61	0.65	0.63	0.61	0.663333	0.7	0.623333	0.603333	0.66	0.676667	0.703333	0.66	0.686667	0.596667	0.73	0.593333	0.676667	0.613333	0.676667	0.673333	0.693333	0.68	0.68	0.676667	0.69	0.676667	0.656667	0.736667	0.74	0.583333	0.683333	0.673333	0.636667	0.62	0.59	0.663333	0.683333
A*24:23	0.753333	0.753333	0.726667	0.75	0.78	0.666667	0.726667	0.74	0.806667	0.736667	0.72	0.65	0.663333	0.703333	0.616667	0.663333	0.65	0.686667	0.676667	0.59	0.646667	0.623333	0.65	0.646667	0.673333	0.583333	0.716667	0.533333	0.663333	0.666667	0.663333	0.66	0.64	0.666667	0.666667	0.663333	0.676667	0.663333	0.643333	0.716667	0.686667	0.57	0.67	0.66	0.583333	0.673333	0.576667	0.653333	0.67
A*24:24	0.813333	0.813333	0.786667	0.763333	0.84	0.733333	0.786667	0.8	0.69	0.803333	0.603333	0.64	0.666667	0.706667	0.606667	0.666667	0.64	0.676667	0.653333	0.58	0.636667	0.666667	0.693333	0.636667	0.663333	0.573333	0.706667	0.68	0.626667	0.67	0.653333	0.65	0.683333	0.656667	0.646667	0.653333	0.666667	0.63	0.61	0.59	0.73	0.56	0.62	0.65	0.626667	0.676667	0.653333	0.69	0.62
A*24:25	0.74	0.74	0.713333	0.736667	0.766667	0.653333	0.713333	0.726667	0.793333	0.723333	0.706667	0.753333	0.766667	0.806667	0.72	0.766667	0.753333	0.79	0.78	0.693333	0.75	0.726667	0.753333	0.75	0.776667	0.686667	0.82	0.52	0.766667	0.77	0.766667	0.763333	0.743333	0.77	0.77	0.766667	0.78	0.766667	0.746667	0.703333	0.79	0.673333	0.773333	0.763333	0.686667	0.776667	0.68	0.756667	0.773333
A*24:26	0.78	0.78	0.753333	0.776667	0.806667	0.693333	0.753333	0.766667	0.693333	0.763333	0.606667	0.653333	0.666667	0.706667	0.62	0.666667	0.653333	0.69	0.68	0.593333	0.65	0.626667	0.653333	0.65	0.676667	0.586667	0.72	0.64	0.666667	0.67	0.666667	0.663333	0.643333	0.67	0.67	0.666667	0.68	0.666667	0.646667	0.603333	0.69	0.573333	0.673333	0.663333	0.586667	0.676667	0.58	0.656667	0.673333
A*24:28	0.58	0.58	0.553333	0.576667	0.606667	0.493333	0.553333	0.566667	0.633333	0.563333	0.546667	0.506667	0.52	0.56	0.473333	0.52	0.506667	0.543333	0.533333	0.446667	0.55	0.48	0.506667	0.503333	0.53	0.44	0.573333	0.273333	0.52	0.523333	0.52	0.516667	0.496667	0.523333	0.523333	0.52	0.533333	0.52	0.546667	0.456667	0.543333	0.426667	0.526667	0.516667	0.44	0.53	0.48	0.51	0.526667
A*24:29	0.666667	0.666667	0.64	0.663333	0.693333	0.58	0.64	0.653333	0.72	0.65	0.633333	0.68	0.693333	0.733333	0.646667	0.693333	0.68	0.716667	0.706667	0.62	0.676667	0.653333	0.68	0.676667	0.703333	0.613333	0.746667	0.446667	0.693333	0.696667	0.693333	0.69	0.67	0.696667	0.696667	0.693333	0.706667	0.693333	0.673333	0.63	0.716667	0.6	0.7	0.69	0.613333	0.703333	0.68	0.683333	0.7
A*24:30	0.726667	0.726667	0.7	0.723333	0.753333	0.64	0.7	0.713333	0.78	0.71	0.693333	0.693333	0.706667	0.746667	0.66	0.706667	0.693333	0.73	0.72	0.633333	0.736667	0.666667	0.693333	0.69	0.716667	0.626667	0.76	0.46	0.706667	0.71	0.706667	0.703333	0.683333	0.71	0.71	0.706667	0.72	0.706667	0.733333	0.643333	0.73	0.613333	0.713333	0.703333	0.626667	0.716667	0.666667	0.696667	0.713333
A*24:31	0.716667	0.716667	0.69	0.713333	0.743333	0.63	0.69	0.703333	0.77	0.7	0.683333	0.73	0.743333	0.783333	0.696667	0.743333	0.73	0.766667	0.756667	0.67	0.726667	0.703333	0.73	0.726667	0.753333	0.663333	0.796667	0.496667	0.743333	0.746667	0.743333	0.74	0.72	0.746667	0.746667	0.743333	0.756667	0.743333	0.723333	0.68	0.766667	0.65	0.75	0.74	0.663333	0.753333	0.656667	0.733333	0.75
A*24:32	0.72	0.72	0.693333	0.716667	0.746667	0.633333	0.693333	0.706667	0.773333	0.703333	0.686667	0.733333	0.746667	0.786667	0.7	0.746667	0.733333	0.77	0.76	0.673333	0.73	0.706667	0.733333	0.73	0.756667	0.666667	0.8	0.5	0.746667	0.75	0.746667	0.743333	0.723333	0.75	0.75	0.746667	0.76	0.746667	0.726667	0.683333	0.77	0.653333	0.753333	0.743333	0.666667	0.756667	0.66	0.736667	0.753333
A*24:37	0.743333	0.743333	0.716667	0.74	0.77	0.656667	0.716667	0.73	0.796667	0.726667	0.71	0.756667	0.77	0.81	0.723333	0.77	0.756667	0.793333	0.783333	0.696667	0.753333	0.73	0.756667	0.753333	0.78	0.69	0.823333	0.523333	0.77	0.773333	0.77	0.766667	0.746667	0.773333	0.773333	0.77	0.783333	0.77	0.75	0.706667	0.793333	0.676667	0.776667	0.766667	0.69	0.78	0.683333	0.76	0.776667
A*24:38	0.806667	0.806667	0.78	0.803333	0.833333	0.72	0.78	0.793333	0.666667	0.79	0.596667	0.643333	0.656667	0.696667	0.61	0.656667	0.643333	0.68	0.67	0.583333	0.64	0.616667	0.643333	0.64	0.666667	0.576667	0.71	0.63	0.656667	0.66	0.656667	0.653333	0.633333	0.66	0.66	0.656667	0.67	0.656667	0.636667	0.593333	0.68	0.563333	0.663333	0.653333	0.576667	0.666667	0.57	0.646667	0.663333
A*24:42	0.776667	0.776667	0.75	0.773333	0.803333	0.69	0.75	0.763333	0.653333	0.76	0.566667	0.53	0.543333	0.583333	0.496667	0.543333	0.53	0.566667	0.556667	0.47	0.573333	0.503333	0.53	0.526667	0.553333	0.463333	0.596667	0.516667	0.543333	0.546667	0.543333	0.54	0.52	0.546667	0.546667	0.543333	0.556667	0.543333	0.57	0.48	0.566667	0.45	0.55	0.54	0.463333	0.553333	0.616667	0.533333	0.55
A*24:46	0.67	0.67	0.643333	0.666667	0.696667	0.643333	0.703333	0.656667	0.676667	0.653333	0.59	0.696667	0.71	0.75	0.663333	0.71	0.696667	0.733333	0.723333	0.636667	0.693333	0.67	0.696667	0.693333	0.696667	0.63	0.763333	0.553333	0.71	0.713333	0.71	0.706667	0.686667	0.713333	0.713333	0.71	0.723333	0.71	0.69	0.646667	0.673333	0.616667	0.716667	0.706667	0.63	0.72	0.623333	0.7	0.716667
A*24:52	0.716667	0.716667	0.71	0.713333	0.743333	0.63	0.69	0.703333	0.723333	0.7	0.636667	0.643333	0.656667	0.696667	0.67	0.656667	0.643333	0.68	0.67	0.583333	0.64	0.616667	0.643333	0.64	0.666667	0.636667	0.71	0.5	0.656667	0.66	0.656667	0.653333	0.633333	0.66	0.66	0.656667	0.67	0.656667	0.636667	0.593333	0.68	0.563333	0.663333	0.653333	0.576667	0.666667	0.57	0.646667	0.663333
A*24:53	0.69	0.69	0.663333	0.686667	0.716667	0.603333	0.663333	0.676667	0.743333	0.673333	0.656667	0.703333	0.716667	0.756667	0.67	0.716667	0.703333	0.736667	0.73	0.673333	0.7	0.676667	0.703333	0.7	0.726667	0.666667	0.766667	0.47	0.716667	0.72	0.716667	0.713333	0.693333	0.72	0.72	0.716667	0.746667	0.716667	0.696667	0.653333	0.74	0.653333	0.723333	0.713333	0.636667	0.726667	0.63	0.706667	0.723333
A*24:64	0.83	0.83	0.826667	0.826667	0.856667	0.743333	0.803333	0.816667	0.706667	0.813333	0.62	0.633333	0.646667	0.686667	0.656667	0.646667	0.633333	0.633333	0.66	0.576667	0.63	0.606667	0.633333	0.63	0.656667	0.626667	0.663333	0.62	0.646667	0.65	0.646667	0.643333	0.623333	0.65	0.65	0.646667	0.633333	0.646667	0.626667	0.583333	0.67	0.556667	0.653333	0.643333	0.566667	0.656667	0.56	0.636667	0.653333
A*24:74	0.72	0.72	0.693333	0.716667	0.746667	0.633333	0.693333	0.706667	0.726667	0.703333	0.64	0.686667	0.7	0.74	0.653333	0.7	0.686667	0.723333	0.713333	0.626667	0.683333	0.66	0.686667	0.683333	0.71	0.62	0.753333	0.543333	0.7	0.703333	0.7	0.696667	0.676667	0.703333	0.703333	0.7	0.713333	0.7	0.68	0.636667	0.723333	0.606667	0.706667	0.696667	0.62	0.71	0.613333	0.69	0.706667
A*24:80	0.723333	0.723333	0.696667	0.72	0.75	0.636667	0.696667	0.71	0.73	0.706667	0.643333	0.69	0.703333	0.743333	0.656667	0.703333	0.69	0.726667	0.716667	0.63	0.686667	0.663333	0.69	0.686667	0.713333	0.623333	0.756667	0.546667	0.703333	0.706667	0.703333	0.7	0.68	0.706667	0.706667	0.703333	0.716667	0.703333	0.683333	0.64	0.726667	0.61	0.71	0.7	0.623333	0.713333	0.616667	0.693333	0.71
A*24:95	0.746667	0.746667	0.72	0.743333	0.773333	0.66	0.72	0.733333	0.776667	0.73	0.713333	0.76	0.773333	0.813333	0.726667	0.773333	0.76	0.796667	0.786667	0.7	0.756667	0.733333	0.76	0.756667	0.783333	0.693333	0.826667	0.526667	0.773333	0.776667	0.773333	0.77	0.75	0.776667	0.776667	0.773333	0.786667	0.773333	0.753333	0.71	0.796667	0.68	0.78	0.77	0.693333	0.783333	0.686667	0.763333	0.78
A*24:109	0.593333	0.593333	0.566667	0.59	0.62	0.506667	0.566667	0.58	0.47	0.576667	0.383333	0.47	0.483333	0.523333	0.436667	0.483333	0.47	0.506667	0.496667	0.41	0.466667	0.443333	0.47	0.466667	0.493333	0.403333	0.536667	0.456667	0.483333	0.486667	0.483333	0.48	0.46	0.486667	0.486667	0.483333	0.496667	0.483333	0.463333	0.42	0.506667	0.39	0.49	0.48	0.403333	0.493333	0.396667	0.473333	0.49
A*24:112	0.733333	0.733333	0.706667	0.73	0.76	0.646667	0.706667	0.72	0.713333	0.716667	0.653333	0.7	0.713333	0.753333	0.666667	0.713333	0.7	0.736667	0.726667	0.64	0.696667	0.673333	0.7	0.696667	0.723333	0.633333	0.766667	0.556667	0.713333	0.716667	0.713333	0.71	0.69	0.716667	0.716667	0.713333	0.726667	0.69	0.67	0.65	0.736667	0.62	0.72	0.71	0.633333	0.723333	0.626667	0.703333	0.72
A*24:167	0.83	0.83	0.803333	0.83	0.856667	0.786667	0.803333	0.816667	0.706667	0.856667	0.62	0.546667	0.493333	0.533333	0.513333	0.493333	0.546667	0.583333	0.506667	0.486667	0.543333	0.56	0.586667	0.543333	0.57	0.48	0.613333	0.696667	0.56	0.496667	0.56	0.556667	0.576667	0.563333	0.563333	0.56	0.573333	0.56	0.54	0.62	0.623333	0.466667	0.566667	0.556667	0.52	0.503333	0.473333	0.546667	0.566667
A*25:01	0.696667	0.75	0.69	0.696667	0.723333	0.74	0.73	0.683333	0.573333	0.723333	0.586667	0.703333	0.676667	0.613333	0.73	0.66	0.686667	0.736667	0.646667	0.656667	0.7	0.716667	0.69	0.71	0.703333	0.753333	0.766667	0.853333	0.69	0.653333	0.69	0.69	0.706667	0.703333	0.71	0.716667	0.746667	0.716667	0.696667	0.776667	0.643333	0.653333	0.723333	0.713333	0.66	0.686667	0.716667	0.703333	0.706667
A*25:02	0.71	0.763333	0.703333	0.71	0.736667	0.753333	0.743333	0.696667	0.586667	0.736667	0.6	0.716667	0.69	0.626667	0.743333	0.673333	0.7	0.75	0.66	0.67	0.713333	0.73	0.703333	0.723333	0.716667	0.766667	0.78	0.866667	0.703333	0.666667	0.703333	0.703333	0.72	0.716667	0.723333	0.73	0.76	0.706667	0.686667	0.79	0.656667	0.666667	0.736667	0.726667	0.673333	0.7	0.73	0.716667	0.72
A*26:01	0.516667	0.57	0.51	0.516667	0.543333	0.56	0.55	0.503333	0.393333	0.543333	0.406667	0.526667	0.5	0.436667	0.553333	0.483333	0.51	0.56	0.47	0.48	0.523333	0.54	0.513333	0.533333	0.526667	0.576667	0.59	0.676667	0.513333	0.476667	0.513333	0.513333	0.53	0.526667	0.533333	0.54	0.57	0.54	0.52	0.6	0.466667	0.476667	0.546667	0.536667	0.483333	0.51	0.54	0.526667	0.53
A*26:02	0.523333	0.576667	0.516667	0.523333	0.55	0.566667	0.556667	0.51	0.4	0.55	0.393333	0.513333	0.486667	0.423333	0.54	0.47	0.496667	0.546667	0.456667	0.466667	0.51	0.526667	0.5	0.52	0.513333	0.563333	0.576667	0.663333	0.5	0.463333	0.5	0.5	0.516667	0.513333	0.52	0.526667	0.556667	0.526667	0.506667	0.586667	0.453333	0.463333	0.533333	0.523333	0.47	0.496667	0.526667	0.513333	0.516667
A*26:03	0.556667	0.61	0.55	0.556667	0.583333	0.6	0.59	0.543333	0.433333	0.583333	0.446667	0.476667	0.45	0.386667	0.503333	0.433333	0.46	0.51	0.42	0.43	0.52	0.49	0.463333	0.483333	0.476667	0.526667	0.54	0.626667	0.463333	0.426667	0.463333	0.463333	0.48	0.476667	0.483333	0.49	0.52	0.49	0.516667	0.55	0.416667	0.426667	0.496667	0.486667	0.433333	0.46	0.536667	0.476667	0.48
A*26:05	0.53	0.583333	0.523333	0.53	0.556667	0.573333	0.563333	0.516667	0.406667	0.556667	0.42	0.536667	0.51	0.446667	0.563333	0.493333	0.52	0.57	0.48	0.49	0.533333	0.55	0.523333	0.543333	0.536667	0.586667	0.6	0.686667	0.523333	0.486667	0.523333	0.523333	0.54	0.536667	0.543333	0.55	0.58	0.55	0.53	0.61	0.476667	0.486667	0.556667	0.546667	0.493333	0.52	0.55	0.536667	0.54
A*26:06	0.573333	0.626667	0.566667	0.573333	0.6	0.616667	0.606667	0.56	0.45	0.6	0.463333	0.493333	0.466667	0.403333	0.52	0.45	0.476667	0.526667	0.436667	0.446667	0.536667	0.506667	0.48	0.5	0.493333	0.543333	0.556667	0.643333	0.48	0.443333	0.48	0.48	0.496667	0.493333	0.5	0.506667	0.536667	0.506667	0.533333	0.566667	0.433333	0.443333	0.513333	0.503333	0.45	0.476667	0.553333	0.493333	0.496667
A*26:07	0.53	0.583333	0.523333	0.53	0.556667	0.573333	0.563333	0.516667	0.406667	0.556667	0.42	0.466667	0.44	0.376667	0.493333	0.423333	0.45	0.5	0.436667	0.42	0.463333	0.48	0.453333	0.473333	0.466667	0.516667	0.53	0.616667	0.48	0.416667	0.453333	0.453333	0.47	0.466667	0.483333	0.48	0.51	0.48	0.46	0.54	0.406667	0.416667	0.486667	0.476667	0.423333	0.45	0.506667	0.466667	0.47
A*26:08	0.516667	0.57	0.51	0.513333	0.543333	0.516667	0.55	0.503333	0.393333	0.5	0.406667	0.523333	0.563333	0.5	0.55	0.546667	0.506667	0.556667	0.533333	0.476667	0.52	0.496667	0.47	0.53	0.523333	0.573333	0.586667	0.633333	0.51	0.54	0.51	0.51	0.486667	0.523333	0.53	0.536667	0.566667	0.536667	0.516667	0.596667	0.423333	0.473333	0.543333	0.533333	0.44	0.573333	0.536667	0.526667	0.526667
A*26:09	0.55	0.603333	0.543333	0.55	0.576667	0.533333	0.523333	0.536667	0.426667	0.576667	0.44	0.5	0.473333	0.41	0.526667	0.456667	0.483333	0.533333	0.443333	0.453333	0.496667	0.513333	0.486667	0.506667	0.523333	0.55	0.563333	0.65	0.486667	0.45	0.486667	0.486667	0.503333	0.5	0.506667	0.513333	0.543333	0.513333	0.493333	0.573333	0.5	0.45	0.52	0.51	0.456667	0.483333	0.513333	0.5	0.503333
A*26:10	0.53	0.583333	0.523333	0.53	0.556667	0.573333	0.563333	0.516667	0.406667	0.556667	0.42	0.513333	0.486667	0.423333	0.54	0.47	0.496667	0.546667	0.456667	0.466667	0.51	0.526667	0.5	0.52	0.513333	0.563333	0.576667	0.663333	0.5	0.463333	0.526667	0.5	0.516667	0.513333	0.52	0.526667	0.556667	0.526667	0.506667	0.586667	0.453333	0.463333	0.533333	0.523333	0.47	0.496667	0.526667	0.513333	0.516667
A*26:12	0.516667	0.57	0.51	0.516667	0.543333	0.533333	0.55	0.503333	0.393333	0.543333	0.406667	0.5	0.473333	0.463333	0.526667	0.456667	0.483333	0.533333	0.443333	0.453333	0.496667	0.513333	0.54	0.506667	0.5	0.55	0.563333	0.65	0.486667	0.45	0.486667	0.486667	0.53	0.5	0.506667	0.513333	0.543333	0.513333	0.493333	0.573333	0.493333	0.45	0.52	0.51	0.456667	0.483333	0.513333	0.5	0.503333
A*26:13	0.493333	0.546667	0.486667	0.493333	0.52	0.536667	0.526667	0.48	0.37	0.52	0.383333	0.503333	0.476667	0.413333	0.53	0.46	0.486667	0.536667	0.446667	0.456667	0.5	0.516667	0.49	0.51	0.503333	0.553333	0.566667	0.653333	0.49	0.453333	0.49	0.49	0.506667	0.503333	0.51	0.516667	0.546667	0.493333	0.473333	0.576667	0.443333	0.453333	0.523333	0.513333	0.46	0.486667	0.516667	0.503333	0.506667
A*26:14	0.506667	0.56	0.5	0.506667	0.533333	0.55	0.54	0.493333	0.383333	0.533333	0.396667	0.516667	0.49	0.45	0.543333	0.473333	0.5	0.55	0.46	0.47	0.513333	0.53	0.503333	0.523333	0.516667	0.566667	0.58	0.666667	0.503333	0.466667	0.503333	0.526667	0.52	0.516667	0.523333	0.53	0.56	0.53	0.51	0.59	0.48	0.466667	0.536667	0.526667	0.473333	0.5	0.53	0.516667	0.52
A*26:15	0.543333	0.596667	0.536667	0.543333	0.57	0.586667	0.576667	0.53	0.42	0.57	0.433333	0.553333	0.526667	0.463333	0.58	0.51	0.536667	0.586667	0.496667	0.506667	0.55	0.566667	0.54	0.56	0.553333	0.603333	0.616667	0.703333	0.54	0.503333	0.54	0.54	0.556667	0.553333	0.56	0.566667	0.596667	0.566667	0.546667	0.626667	0.493333	0.503333	0.573333	0.563333	0.51	0.536667	0.566667	0.553333	0.556667
A*26:16	0.543333	0.543333	0.536667	0.543333	0.57	0.586667	0.576667	0.53	0.42	0.57	0.433333	0.553333	0.526667	0.463333	0.58	0.526667	0.553333	0.586667	0.513333	0.523333	0.55	0.566667	0.54	0.576667	0.553333	0.603333	0.616667	0.703333	0.54	0.503333	0.54	0.54	0.556667	0.57	0.56	0.566667	0.596667	0.566667	0.546667	0.626667	0.493333	0.503333	0.573333	0.563333	0.526667	0.536667	0.566667	0.553333	0.573333
A*26:17	0.523333	0.576667	0.516667	0.523333	0.55	0.566667	0.556667	0.51	0.4	0.55	0.413333	0.533333	0.506667	0.443333	0.56	0.49	0.516667	0.566667	0.476667	0.486667	0.53	0.546667	0.52	0.54	0.533333	0.583333	0.596667	0.683333	0.52	0.483333	0.52	0.52	0.536667	0.533333	0.54	0.546667	0.576667	0.546667	0.526667	0.606667	0.473333	0.483333	0.553333	0.543333	0.49	0.516667	0.546667	0.533333	0.536667
A*26:18	0.526667	0.58	0.52	0.526667	0.553333	0.543333	0.56	0.513333	0.403333	0.553333	0.416667	0.51	0.483333	0.496667	0.536667	0.466667	0.493333	0.543333	0.453333	0.463333	0.506667	0.523333	0.55	0.516667	0.51	0.56	0.573333	0.66	0.496667	0.46	0.496667	0.52	0.54	0.51	0.516667	0.523333	0.553333	0.523333	0.503333	0.583333	0.526667	0.46	0.49	0.52	0.466667	0.493333	0.523333	0.51	0.473333
A*26:19	0.496667	0.55	0.49	0.496667	0.523333	0.54	0.53	0.483333	0.373333	0.523333	0.386667	0.516667	0.49	0.426667	0.543333	0.473333	0.5	0.55	0.46	0.47	0.513333	0.53	0.503333	0.523333	0.516667	0.566667	0.58	0.666667	0.503333	0.466667	0.503333	0.503333	0.52	0.486667	0.523333	0.53	0.56	0.506667	0.486667	0.59	0.456667	0.466667	0.536667	0.526667	0.473333	0.5	0.52	0.516667	0.52
A*26:20	0.476667	0.543333	0.47	0.476667	0.503333	0.52	0.51	0.463333	0.353333	0.503333	0.366667	0.486667	0.46	0.396667	0.513333	0.473333	0.5	0.52	0.46	0.47	0.483333	0.5	0.473333	0.523333	0.486667	0.536667	0.55	0.636667	0.473333	0.436667	0.473333	0.473333	0.49	0.516667	0.493333	0.5	0.53	0.5	0.48	0.56	0.426667	0.436667	0.506667	0.496667	0.473333	0.47	0.5	0.486667	0.52
A*26:30	0.576667	0.63	0.57	0.576667	0.603333	0.62	0.61	0.563333	0.453333	0.603333	0.466667	0.46	0.433333	0.37	0.486667	0.416667	0.443333	0.493333	0.403333	0.413333	0.503333	0.473333	0.446667	0.466667	0.46	0.51	0.523333	0.61	0.446667	0.41	0.446667	0.446667	0.463333	0.46	0.466667	0.473333	0.503333	0.473333	0.5	0.533333	0.4	0.41	0.48	0.47	0.416667	0.443333	0.52	0.46	0.463333
A*26:32	0.476667	0.53	0.483333	0.476667	0.503333	0.52	0.51	0.463333	0.353333	0.503333	0.366667	0.533333	0.493333	0.443333	0.516667	0.476667	0.516667	0.566667	0.463333	0.486667	0.53	0.546667	0.52	0.526667	0.533333	0.526667	0.596667	0.683333	0.52	0.483333	0.52	0.52	0.536667	0.533333	0.54	0.546667	0.576667	0.546667	0.526667	0.606667	0.473333	0.483333	0.553333	0.543333	0.49	0.503333	0.546667	0.533333	0.536667
A*26:33	0.54	0.593333	0.533333	0.54	0.566667	0.583333	0.573333	0.526667	0.416667	0.566667	0.43	0.503333	0.476667	0.413333	0.53	0.46	0.486667	0.536667	0.446667	0.456667	0.51	0.516667	0.49	0.51	0.503333	0.553333	0.566667	0.653333	0.49	0.453333	0.49	0.49	0.506667	0.503333	0.51	0.516667	0.546667	0.493333	0.52	0.576667	0.443333	0.453333	0.523333	0.513333	0.46	0.486667	0.563333	0.503333	0.506667
A*26:34	0.5	0.553333	0.493333	0.5	0.526667	0.536667	0.526667	0.486667	0.376667	0.526667	0.39	0.503333	0.476667	0.413333	0.53	0.46	0.486667	0.536667	0.446667	0.456667	0.5	0.516667	0.49	0.51	0.51	0.553333	0.566667	0.653333	0.49	0.453333	0.49	0.49	0.506667	0.503333	0.51	0.516667	0.546667	0.516667	0.496667	0.576667	0.45	0.453333	0.523333	0.513333	0.46	0.486667	0.516667	0.503333	0.506667
A*26:35	0.5	0.553333	0.493333	0.5	0.526667	0.543333	0.533333	0.486667	0.376667	0.526667	0.39	0.51	0.483333	0.42	0.536667	0.466667	0.493333	0.543333	0.453333	0.463333	0.506667	0.523333	0.496667	0.516667	0.51	0.56	0.573333	0.66	0.496667	0.46	0.496667	0.496667	0.513333	0.51	0.516667	0.523333	0.553333	0.523333	0.503333	0.583333	0.45	0.46	0.53	0.52	0.466667	0.493333	0.523333	0.51	0.513333
A*26:52	0.536667	0.59	0.53	0.536667	0.563333	0.58	0.57	0.523333	0.413333	0.563333	0.426667	0.546667	0.52	0.456667	0.573333	0.503333	0.53	0.58	0.49	0.5	0.543333	0.56	0.533333	0.553333	0.546667	0.596667	0.61	0.696667	0.533333	0.496667	0.533333	0.533333	0.55	0.546667	0.553333	0.56	0.59	0.56	0.54	0.62	0.486667	0.496667	0.526667	0.556667	0.503333	0.53	0.56	0.546667	0.51
A*26:67	0.5	0.553333	0.493333	0.496667	0.526667	0.5	0.533333	0.486667	0.376667	0.483333	0.39	0.506667	0.546667	0.483333	0.533333	0.53	0.49	0.54	0.516667	0.46	0.503333	0.48	0.453333	0.513333	0.506667	0.556667	0.57	0.616667	0.493333	0.523333	0.493333	0.493333	0.47	0.506667	0.513333	0.52	0.55	0.52	0.5	0.58	0.406667	0.456667	0.526667	0.516667	0.423333	0.556667	0.52	0.51	0.51
A*29:01	0.72	0.723333	0.693333	0.67	0.746667	0.64	0.693333	0.706667	0.633333	0.71	0.673333	0.616667	0.67	0.683333	0.583333	0.666667	0.613333	0.65	0.653333	0.583333	0.613333	0.643333	0.67	0.636667	0.64	0.606667	0.68	0.78	0.603333	0.646667	0.603333	0.626667	0.66	0.63	0.623333	0.63	0.66	0.606667	0.586667	0.69	0.706667	0.566667	0.596667	0.626667	0.6	0.68	0.633333	0.666667	0.593333
A*29:02	0.7	0.703333	0.673333	0.65	0.726667	0.62	0.673333	0.686667	0.613333	0.69	0.653333	0.596667	0.65	0.663333	0.563333	0.646667	0.593333	0.63	0.633333	0.563333	0.593333	0.623333	0.65	0.616667	0.62	0.586667	0.66	0.76	0.583333	0.626667	0.583333	0.606667	0.64	0.61	0.603333	0.61	0.64	0.586667	0.566667	0.67	0.686667	0.546667	0.576667	0.606667	0.58	0.66	0.613333	0.646667	0.573333
A*29:03	0.65	0.653333	0.623333	0.6	0.676667	0.57	0.623333	0.636667	0.563333	0.64	0.603333	0.67	0.723333	0.736667	0.636667	0.72	0.666667	0.703333	0.706667	0.636667	0.666667	0.696667	0.723333	0.69	0.693333	0.66	0.733333	0.71	0.656667	0.7	0.656667	0.68	0.713333	0.683333	0.676667	0.683333	0.713333	0.66	0.64	0.62	0.76	0.62	0.65	0.68	0.653333	0.733333	0.686667	0.72	0.646667
A*29:04	0.71	0.713333	0.683333	0.66	0.736667	0.63	0.683333	0.696667	0.623333	0.7	0.663333	0.606667	0.66	0.673333	0.573333	0.656667	0.603333	0.64	0.643333	0.573333	0.603333	0.633333	0.66	0.626667	0.63	0.596667	0.67	0.77	0.593333	0.636667	0.593333	0.616667	0.65	0.62	0.59	0.62	0.65	0.596667	0.576667	0.68	0.696667	0.556667	0.586667	0.616667	0.59	0.67	0.623333	0.656667	0.583333
A*29:09	0.683333	0.686667	0.656667	0.633333	0.71	0.603333	0.656667	0.67	0.596667	0.673333	0.636667	0.58	0.633333	0.646667	0.546667	0.63	0.576667	0.613333	0.616667	0.546667	0.576667	0.606667	0.633333	0.6	0.603333	0.57	0.643333	0.743333	0.566667	0.61	0.566667	0.59	0.623333	0.593333	0.586667	0.593333	0.623333	0.57	0.55	0.653333	0.67	0.53	0.56	0.59	0.563333	0.643333	0.596667	0.63	0.556667
A*29:10	0.72	0.723333	0.693333	0.67	0.746667	0.64	0.693333	0.706667	0.633333	0.71	0.673333	0.616667	0.67	0.683333	0.583333	0.666667	0.613333	0.65	0.653333	0.583333	0.613333	0.643333	0.67	0.636667	0.64	0.606667	0.68	0.78	0.603333	0.646667	0.603333	0.626667	0.66	0.63	0.623333	0.63	0.66	0.606667	0.586667	0.69	0.706667	0.566667	0.596667	0.626667	0.6	0.68	0.633333	0.666667	0.593333
A*29:11	0.723333	0.726667	0.696667	0.673333	0.75	0.643333	0.696667	0.71	0.636667	0.713333	0.676667	0.62	0.673333	0.686667	0.586667	0.67	0.616667	0.653333	0.656667	0.586667	0.616667	0.646667	0.673333	0.64	0.643333	0.61	0.683333	0.783333	0.606667	0.65	0.606667	0.63	0.663333	0.633333	0.626667	0.633333	0.663333	0.61	0.59	0.693333	0.71	0.57	0.6	0.63	0.603333	0.683333	0.636667	0.67	0.596667
A*29:12	0.756667	0.76	0.73	0.706667	0.783333	0.676667	0.73	0.743333	0.67	0.746667	0.71	0.653333	0.706667	0.72	0.62	0.703333	0.65	0.686667	0.69	0.62	0.65	0.68	0.706667	0.673333	0.676667	0.643333	0.716667	0.816667	0.64	0.683333	0.64	0.663333	0.696667	0.666667	0.66	0.666667	0.696667	0.643333	0.623333	0.726667	0.743333	0.603333	0.633333	0.663333	0.636667	0.716667	0.67	0.703333	0.63
A*29:13	0.88	0.883333	0.853333	0.83	0.906667	0.8	0.853333	0.866667	0.793333	0.87	0.833333	0.773333	0.826667	0.84	0.74	0.823333	0.77	0.806667	0.81	0.74	0.77	0.8	0.826667	0.793333	0.796667	0.763333	0.836667	0.936667	0.76	0.803333	0.76	0.783333	0.816667	0.786667	0.78	0.786667	0.816667	0.763333	0.743333	0.846667	0.863333	0.723333	0.753333	0.783333	0.756667	0.836667	0.79	0.823333	0.75
A*29:14	0.696667	0.7	0.67	0.646667	0.723333	0.616667	0.67	0.683333	0.61	0.686667	0.65	0.61	0.663333	0.676667	0.576667	0.66	0.606667	0.643333	0.646667	0.576667	0.606667	0.636667	0.663333	0.63	0.633333	0.6	0.673333	0.773333	0.596667	0.64	0.596667	0.62	0.653333	0.593333	0.616667	0.623333	0.653333	0.6	0.58	0.683333	0.7	0.56	0.59	0.62	0.593333	0.673333	0.613333	0.66	0.586667
A*29:15	0.65	0.653333	0.623333	0.6	0.676667	0.57	0.623333	0.636667	0.526667	0.64	0.566667	0.51	0.563333	0.576667	0.476667	0.56	0.506667	0.543333	0.546667	0.476667	0.506667	0.536667	0.563333	0.53	0.533333	0.5	0.56	0.673333	0.496667	0.54	0.496667	0.52	0.553333	0.523333	0.516667	0.523333	0.553333	0.5	0.48	0.583333	0.6	0.46	0.49	0.52	0.493333	0.573333	0.526667	0.56	0.486667
A*30:01	0.543333	0.5	0.56	0.493333	0.57	0.486667	0.516667	0.53	0.72	0.533333	0.696667	0.66	0.713333	0.7	0.646667	0.713333	0.66	0.693333	0.7	0.63	0.656667	0.686667	0.686667	0.683333	0.683333	0.67	0.723333	0.646667	0.646667	0.69	0.646667	0.67	0.68	0.646667	0.666667	0.673333	0.703333	0.65	0.63	0.733333	0.723333	0.61	0.64	0.67	0.646667	0.723333	0.663333	0.71	0.64
A*30:02	0.51	0.466667	0.526667	0.46	0.536667	0.45	0.483333	0.496667	0.686667	0.5	0.663333	0.663333	0.716667	0.7	0.65	0.716667	0.663333	0.696667	0.703333	0.633333	0.66	0.69	0.686667	0.686667	0.686667	0.673333	0.726667	0.65	0.65	0.693333	0.65	0.673333	0.686667	0.65	0.67	0.676667	0.706667	0.676667	0.656667	0.736667	0.723333	0.613333	0.643333	0.673333	0.65	0.726667	0.666667	0.713333	0.643333
A*30:04	0.46	0.416667	0.476667	0.46	0.486667	0.416667	0.433333	0.446667	0.636667	0.486667	0.613333	0.643333	0.616667	0.63	0.63	0.616667	0.643333	0.676667	0.603333	0.613333	0.64	0.656667	0.683333	0.666667	0.666667	0.653333	0.706667	0.616667	0.63	0.593333	0.63	0.653333	0.673333	0.63	0.65	0.656667	0.686667	0.656667	0.636667	0.716667	0.72	0.593333	0.663333	0.653333	0.616667	0.626667	0.646667	0.643333	0.663333
A*30:07	0.576667	0.533333	0.593333	0.526667	0.603333	0.516667	0.55	0.563333	0.753333	0.566667	0.73	0.683333	0.736667	0.72	0.67	0.736667	0.683333	0.716667	0.75	0.653333	0.68	0.71	0.706667	0.706667	0.706667	0.693333	0.746667	0.67	0.696667	0.713333	0.67	0.693333	0.706667	0.67	0.7	0.696667	0.726667	0.696667	0.676667	0.756667	0.743333	0.633333	0.663333	0.693333	0.67	0.746667	0.61	0.733333	0.663333
A*30:08	0.516667	0.526667	0.533333	0.466667	0.543333	0.46	0.49	0.503333	0.693333	0.506667	0.67	0.633333	0.686667	0.673333	0.62	0.67	0.616667	0.666667	0.656667	0.586667	0.63	0.66	0.66	0.64	0.656667	0.643333	0.696667	0.62	0.62	0.663333	0.62	0.643333	0.653333	0.603333	0.64	0.646667	0.676667	0.623333	0.603333	0.706667	0.696667	0.583333	0.613333	0.643333	0.603333	0.696667	0.636667	0.683333	0.596667
A*30:09	0.5	0.456667	0.516667	0.45	0.526667	0.42	0.473333	0.486667	0.676667	0.49	0.653333	0.633333	0.686667	0.7	0.62	0.686667	0.633333	0.666667	0.673333	0.603333	0.63	0.66	0.686667	0.656667	0.656667	0.643333	0.696667	0.62	0.62	0.663333	0.62	0.643333	0.676667	0.62	0.64	0.646667	0.676667	0.646667	0.626667	0.706667	0.723333	0.583333	0.613333	0.643333	0.62	0.696667	0.636667	0.683333	0.613333
A*30:10	0.543333	0.5	0.56	0.493333	0.57	0.483333	0.516667	0.53	0.72	0.533333	0.696667	0.696667	0.75	0.733333	0.683333	0.75	0.696667	0.706667	0.736667	0.656667	0.693333	0.723333	0.72	0.72	0.72	0.696667	0.736667	0.683333	0.683333	0.726667	0.683333	0.706667	0.72	0.683333	0.703333	0.71	0.7	0.71	0.69	0.77	0.756667	0.636667	0.676667	0.706667	0.683333	0.76	0.7	0.746667	0.676667
A*30:11	0.51	0.466667	0.526667	0.46	0.536667	0.453333	0.483333	0.496667	0.686667	0.5	0.663333	0.626667	0.68	0.666667	0.613333	0.68	0.626667	0.66	0.666667	0.596667	0.623333	0.653333	0.653333	0.65	0.65	0.636667	0.69	0.613333	0.613333	0.656667	0.613333	0.636667	0.646667	0.643333	0.633333	0.64	0.67	0.616667	0.596667	0.7	0.69	0.576667	0.606667	0.636667	0.613333	0.69	0.63	0.676667	0.606667
A*30:16	0.563333	0.52	0.58	0.513333	0.59	0.506667	0.536667	0.55	0.74	0.553333	0.716667	0.633333	0.686667	0.673333	0.62	0.686667	0.633333	0.666667	0.673333	0.603333	0.676667	0.66	0.66	0.656667	0.656667	0.643333	0.696667	0.62	0.62	0.663333	0.62	0.643333	0.653333	0.62	0.64	0.646667	0.676667	0.623333	0.65	0.706667	0.696667	0.583333	0.613333	0.643333	0.62	0.696667	0.683333	0.683333	0.613333
A*30:17	0.64	0.596667	0.656667	0.64	0.666667	0.596667	0.613333	0.626667	0.516667	0.666667	0.493333	0.483333	0.456667	0.47	0.47	0.456667	0.483333	0.516667	0.443333	0.453333	0.48	0.496667	0.523333	0.506667	0.506667	0.493333	0.546667	0.633333	0.47	0.433333	0.47	0.493333	0.513333	0.47	0.49	0.496667	0.526667	0.473333	0.453333	0.556667	0.56	0.433333	0.503333	0.493333	0.456667	0.466667	0.486667	0.483333	0.503333
A*30:18	0.6	0.6	0.616667	0.55	0.626667	0.543333	0.573333	0.586667	0.606667	0.59	0.583333	0.546667	0.6	0.586667	0.533333	0.6	0.546667	0.58	0.586667	0.516667	0.543333	0.573333	0.573333	0.57	0.57	0.556667	0.61	0.58	0.533333	0.576667	0.533333	0.556667	0.566667	0.533333	0.553333	0.56	0.59	0.536667	0.516667	0.62	0.61	0.496667	0.526667	0.556667	0.533333	0.61	0.55	0.596667	0.526667
A*30:25	0.523333	0.48	0.54	0.473333	0.55	0.463333	0.496667	0.51	0.7	0.513333	0.676667	0.676667	0.73	0.713333	0.663333	0.73	0.676667	0.71	0.716667	0.646667	0.673333	0.703333	0.7	0.7	0.7	0.686667	0.74	0.663333	0.663333	0.706667	0.663333	0.686667	0.7	0.663333	0.683333	0.69	0.72	0.666667	0.646667	0.75	0.736667	0.626667	0.656667	0.686667	0.663333	0.74	0.68	0.726667	0.656667
A*31:01	0.72	0.723333	0.693333	0.67	0.746667	0.64	0.693333	0.706667	0.663333	0.71	0.676667	0.593333	0.646667	0.66	0.56	0.643333	0.59	0.626667	0.63	0.56	0.553333	0.62	0.646667	0.613333	0.616667	0.583333	0.656667	0.726667	0.58	0.623333	0.58	0.603333	0.636667	0.576667	0.6	0.606667	0.636667	0.606667	0.586667	0.666667	0.683333	0.543333	0.573333	0.603333	0.576667	0.656667	0.596667	0.643333	0.57
A*31:02	0.733333	0.736667	0.706667	0.683333	0.76	0.653333	0.706667	0.72	0.676667	0.723333	0.69	0.58	0.633333	0.646667	0.546667	0.63	0.576667	0.613333	0.643333	0.546667	0.54	0.606667	0.633333	0.6	0.603333	0.57	0.643333	0.713333	0.593333	0.61	0.566667	0.59	0.623333	0.563333	0.596667	0.593333	0.623333	0.593333	0.573333	0.653333	0.67	0.53	0.56	0.59	0.563333	0.643333	0.583333	0.63	0.556667
A*31:03	0.586667	0.59	0.603333	0.536667	0.613333	0.506667	0.56	0.573333	0.463333	0.576667	0.503333	0.48	0.533333	0.546667	0.466667	0.53	0.476667	0.513333	0.516667	0.446667	0.44	0.506667	0.533333	0.5	0.503333	0.49	0.543333	0.643333	0.466667	0.51	0.466667	0.49	0.523333	0.463333	0.486667	0.493333	0.523333	0.493333	0.473333	0.553333	0.57	0.43	0.46	0.49	0.463333	0.543333	0.483333	0.53	0.456667
A*31:04	0.683333	0.686667	0.7	0.633333	0.71	0.603333	0.656667	0.67	0.626667	0.673333	0.666667	0.606667	0.66	0.673333	0.593333	0.656667	0.603333	0.64	0.643333	0.573333	0.566667	0.633333	0.66	0.626667	0.63	0.616667	0.67	0.74	0.593333	0.636667	0.593333	0.616667	0.65	0.59	0.613333	0.62	0.65	0.62	0.6	0.68	0.696667	0.556667	0.586667	0.616667	0.59	0.67	0.61	0.656667	0.583333
A*31:05	0.67	0.673333	0.643333	0.62	0.696667	0.59	0.643333	0.656667	0.613333	0.66	0.626667	0.666667	0.72	0.733333	0.633333	0.716667	0.663333	0.7	0.703333	0.633333	0.626667	0.693333	0.72	0.686667	0.69	0.656667	0.73	0.676667	0.653333	0.696667	0.653333	0.676667	0.71	0.65	0.673333	0.68	0.71	0.68	0.66	0.616667	0.756667	0.616667	0.646667	0.676667	0.65	0.73	0.67	0.716667	0.643333
A*31:06	0.7	0.703333	0.673333	0.65	0.726667	0.62	0.673333	0.686667	0.643333	0.69	0.683333	0.6	0.653333	0.666667	0.566667	0.65	0.596667	0.633333	0.636667	0.566667	0.56	0.626667	0.653333	0.62	0.623333	0.59	0.663333	0.733333	0.586667	0.63	0.586667	0.61	0.643333	0.583333	0.606667	0.613333	0.643333	0.613333	0.593333	0.673333	0.69	0.55	0.58	0.61	0.583333	0.663333	0.603333	0.65	0.576667
A*31:08	0.883333	0.886667	0.856667	0.833333	0.91	0.803333	0.856667	0.87	0.826667	0.873333	0.84	0.75	0.803333	0.816667	0.716667	0.8	0.746667	0.783333	0.813333	0.716667	0.746667	0.776667	0.803333	0.77	0.773333	0.74	0.813333	0.883333	0.763333	0.78	0.736667	0.76	0.793333	0.763333	0.766667	0.763333	0.793333	0.763333	0.743333	0.823333	0.84	0.7	0.73	0.76	0.733333	0.813333	0.676667	0.8	0.726667
A*31:09	0.73	0.733333	0.703333	0.68	0.756667	0.65	0.703333	0.716667	0.673333	0.72	0.686667	0.603333	0.656667	0.67	0.57	0.653333	0.6	0.636667	0.64	0.57	0.563333	0.63	0.656667	0.623333	0.626667	0.593333	0.666667	0.736667	0.59	0.633333	0.59	0.613333	0.646667	0.586667	0.61	0.616667	0.646667	0.616667	0.596667	0.676667	0.693333	0.553333	0.583333	0.613333	0.586667	0.666667	0.606667	0.653333	0.58
A*31:10	0.763333	0.766667	0.736667	0.713333	0.79	0.683333	0.736667	0.75	0.67	0.753333	0.683333	0.64	0.693333	0.706667	0.606667	0.69	0.636667	0.673333	0.676667	0.606667	0.636667	0.666667	0.693333	0.66	0.663333	0.63	0.703333	0.773333	0.626667	0.67	0.626667	0.65	0.683333	0.623333	0.646667	0.653333	0.683333	0.653333	0.633333	0.713333	0.73	0.59	0.62	0.65	0.623333	0.703333	0.643333	0.69	0.616667
A*31:11	0.736667	0.74	0.71	0.686667	0.763333	0.656667	0.71	0.723333	0.68	0.726667	0.693333	0.61	0.663333	0.676667	0.576667	0.66	0.606667	0.643333	0.646667	0.576667	0.57	0.636667	0.663333	0.63	0.633333	0.6	0.673333	0.743333	0.596667	0.64	0.596667	0.62	0.653333	0.593333	0.616667	0.623333	0.653333	0.623333	0.603333	0.683333	0.7	0.56	0.59	0.62	0.593333	0.673333	0.613333	0.66	0.586667
A*31:12	0.733333	0.736667	0.723333	0.683333	0.76	0.653333	0.706667	0.72	0.676667	0.723333	0.69	0.583333	0.636667	0.65	0.59	0.633333	0.58	0.616667	0.62	0.55	0.543333	0.61	0.636667	0.603333	0.606667	0.613333	0.646667	0.716667	0.57	0.613333	0.57	0.593333	0.626667	0.566667	0.59	0.596667	0.626667	0.596667	0.576667	0.656667	0.673333	0.533333	0.563333	0.593333	0.566667	0.646667	0.586667	0.633333	0.56
A*31:13	0.723333	0.726667	0.696667	0.673333	0.75	0.643333	0.696667	0.71	0.666667	0.713333	0.68	0.596667	0.65	0.663333	0.563333	0.646667	0.593333	0.63	0.633333	0.563333	0.556667	0.623333	0.65	0.616667	0.62	0.586667	0.66	0.73	0.583333	0.626667	0.583333	0.606667	0.64	0.58	0.603333	0.61	0.64	0.61	0.59	0.67	0.686667	0.546667	0.576667	0.606667	0.58	0.66	0.6	0.646667	0.573333
A*31:15	0.74	0.743333	0.713333	0.69	0.766667	0.66	0.713333	0.726667	0.683333	0.73	0.696667	0.613333	0.666667	0.68	0.58	0.663333	0.61	0.646667	0.65	0.58	0.573333	0.64	0.666667	0.633333	0.636667	0.603333	0.676667	0.746667	0.6	0.643333	0.6	0.623333	0.656667	0.596667	0.62	0.626667	0.656667	0.613333	0.593333	0.686667	0.703333	0.563333	0.593333	0.623333	0.596667	0.676667	0.616667	0.663333	0.59
A*31:16	0.756667	0.76	0.73	0.706667	0.783333	0.676667	0.73	0.743333	0.7	0.746667	0.713333	0.63	0.683333	0.696667	0.596667	0.68	0.626667	0.663333	0.666667	0.596667	0.59	0.656667	0.683333	0.65	0.653333	0.62	0.693333	0.763333	0.616667	0.66	0.616667	0.64	0.673333	0.613333	0.636667	0.643333	0.673333	0.643333	0.623333	0.703333	0.72	0.58	0.61	0.64	0.613333	0.693333	0.633333	0.68	0.606667
A*31:18	0.706667	0.71	0.68	0.656667	0.733333	0.626667	0.68	0.693333	0.65	0.696667	0.663333	0.63	0.683333	0.696667	0.596667	0.68	0.626667	0.663333	0.666667	0.596667	0.59	0.656667	0.683333	0.65	0.653333	0.62	0.693333	0.713333	0.616667	0.66	0.616667	0.64	0.673333	0.613333	0.636667	0.643333	0.673333	0.643333	0.623333	0.653333	0.72	0.58	0.61	0.64	0.613333	0.693333	0.633333	0.68	0.606667
A*31:24	0.53	0.533333	0.503333	0.526667	0.556667	0.533333	0.563333	0.516667	0.436667	0.513333	0.45	0.503333	0.543333	0.53	0.47	0.54	0.5	0.536667	0.526667	0.47	0.463333	0.476667	0.476667	0.523333	0.503333	0.493333	0.566667	0.583333	0.49	0.52	0.49	0.513333	0.463333	0.486667	0.51	0.516667	0.546667	0.516667	0.496667	0.576667	0.453333	0.453333	0.523333	0.513333	0.433333	0.553333	0.506667	0.506667	0.52
A*31:32	0.766667	0.77	0.74	0.716667	0.793333	0.686667	0.74	0.753333	0.71	0.756667	0.723333	0.64	0.693333	0.706667	0.606667	0.69	0.636667	0.673333	0.676667	0.606667	0.6	0.666667	0.693333	0.66	0.663333	0.63	0.703333	0.773333	0.626667	0.67	0.626667	0.65	0.683333	0.623333	0.646667	0.653333	0.683333	0.653333	0.633333	0.713333	0.73	0.59	0.62	0.65	0.623333	0.703333	0.643333	0.69	0.616667
A*31:42	0.67	0.673333	0.643333	0.62	0.696667	0.59	0.643333	0.656667	0.546667	0.66	0.56	0.476667	0.53	0.543333	0.443333	0.526667	0.473333	0.51	0.513333	0.443333	0.436667	0.503333	0.53	0.496667	0.5	0.466667	0.54	0.64	0.463333	0.506667	0.463333	0.486667	0.52	0.46	0.483333	0.49	0.52	0.49	0.47	0.55	0.566667	0.426667	0.456667	0.486667	0.46	0.54	0.443333	0.526667	0.453333
A*32:01	0.823333	0.89	0.796667	0.773333	0.85	0.743333	0.796667	0.81	0.736667	0.813333	0.75	0.743333	0.796667	0.81	0.71	0.81	0.756667	0.776667	0.796667	0.726667	0.74	0.77	0.796667	0.78	0.766667	0.733333	0.806667	0.906667	0.73	0.773333	0.73	0.753333	0.786667	0.773333	0.75	0.756667	0.786667	0.756667	0.736667	0.816667	0.833333	0.693333	0.723333	0.753333	0.743333	0.806667	0.746667	0.793333	0.736667
A*32:02	0.783333	0.85	0.756667	0.78	0.81	0.696667	0.756667	0.77	0.696667	0.766667	0.71	0.75	0.79	0.803333	0.716667	0.803333	0.763333	0.783333	0.79	0.733333	0.746667	0.723333	0.75	0.786667	0.773333	0.74	0.813333	0.86	0.736667	0.766667	0.736667	0.76	0.74	0.78	0.756667	0.763333	0.793333	0.763333	0.743333	0.823333	0.786667	0.7	0.77	0.76	0.696667	0.8	0.753333	0.753333	0.783333
A*32:03	0.81	0.876667	0.783333	0.76	0.836667	0.73	0.783333	0.796667	0.723333	0.8	0.736667	0.73	0.783333	0.796667	0.696667	0.796667	0.743333	0.763333	0.783333	0.713333	0.726667	0.756667	0.783333	0.766667	0.753333	0.72	0.793333	0.893333	0.716667	0.76	0.716667	0.74	0.773333	0.76	0.736667	0.743333	0.773333	0.743333	0.723333	0.803333	0.82	0.68	0.71	0.74	0.73	0.793333	0.733333	0.78	0.723333
A*32:04	0.48	0.546667	0.496667	0.43	0.506667	0.426667	0.453333	0.466667	0.656667	0.47	0.696667	0.703333	0.756667	0.716667	0.69	0.77	0.716667	0.736667	0.756667	0.686667	0.7	0.73	0.703333	0.74	0.726667	0.713333	0.766667	0.69	0.69	0.733333	0.69	0.713333	0.72	0.733333	0.71	0.716667	0.746667	0.716667	0.696667	0.776667	0.74	0.653333	0.723333	0.713333	0.703333	0.766667	0.706667	0.753333	0.736667
A*32:07	0.863333	0.863333	0.836667	0.813333	0.89	0.783333	0.836667	0.85	0.776667	0.853333	0.79	0.783333	0.836667	0.85	0.75	0.836667	0.783333	0.816667	0.823333	0.753333	0.78	0.81	0.836667	0.806667	0.806667	0.773333	0.846667	0.946667	0.77	0.813333	0.77	0.793333	0.826667	0.8	0.79	0.796667	0.826667	0.796667	0.776667	0.856667	0.873333	0.733333	0.763333	0.793333	0.77	0.846667	0.786667	0.833333	0.763333
A*32:08	0.843333	0.91	0.816667	0.793333	0.87	0.763333	0.816667	0.83	0.756667	0.833333	0.77	0.716667	0.77	0.783333	0.683333	0.783333	0.73	0.75	0.77	0.7	0.76	0.743333	0.77	0.753333	0.74	0.706667	0.78	0.88	0.703333	0.746667	0.703333	0.726667	0.76	0.746667	0.723333	0.73	0.76	0.73	0.756667	0.79	0.806667	0.666667	0.696667	0.726667	0.716667	0.78	0.766667	0.766667	0.71
A*32:17	0.836667	0.903333	0.81	0.786667	0.863333	0.756667	0.81	0.823333	0.75	0.826667	0.763333	0.756667	0.81	0.823333	0.723333	0.823333	0.77	0.79	0.81	0.74	0.753333	0.783333	0.81	0.793333	0.78	0.746667	0.82	0.92	0.743333	0.786667	0.743333	0.766667	0.8	0.786667	0.763333	0.77	0.8	0.746667	0.726667	0.83	0.846667	0.706667	0.736667	0.766667	0.756667	0.82	0.76	0.806667	0.75
A*32:21	0.733333	0.8	0.706667	0.683333	0.76	0.653333	0.706667	0.72	0.61	0.723333	0.623333	0.616667	0.67	0.683333	0.583333	0.683333	0.63	0.65	0.67	0.6	0.613333	0.643333	0.67	0.653333	0.64	0.606667	0.68	0.78	0.603333	0.646667	0.603333	0.626667	0.66	0.646667	0.623333	0.63	0.66	0.63	0.61	0.69	0.706667	0.566667	0.596667	0.626667	0.616667	0.68	0.62	0.666667	0.61
A*33:01	0.76	0.763333	0.733333	0.71	0.786667	0.68	0.733333	0.746667	0.703333	0.75	0.716667	0.623333	0.676667	0.69	0.59	0.673333	0.62	0.656667	0.66	0.59	0.583333	0.65	0.676667	0.643333	0.646667	0.613333	0.686667	0.756667	0.61	0.653333	0.61	0.633333	0.666667	0.636667	0.63	0.636667	0.666667	0.636667	0.616667	0.696667	0.713333	0.573333	0.603333	0.633333	0.606667	0.686667	0.636667	0.673333	0.6
A*33:03	0.716667	0.72	0.69	0.666667	0.743333	0.636667	0.69	0.703333	0.66	0.706667	0.673333	0.58	0.633333	0.646667	0.546667	0.63	0.576667	0.613333	0.616667	0.546667	0.54	0.606667	0.633333	0.6	0.603333	0.57	0.643333	0.713333	0.566667	0.61	0.566667	0.59	0.623333	0.593333	0.586667	0.593333	0.623333	0.593333	0.573333	0.653333	0.67	0.53	0.56	0.59	0.563333	0.643333	0.593333	0.63	0.556667
A*33:05	0.776667	0.78	0.75	0.726667	0.803333	0.696667	0.75	0.763333	0.72	0.766667	0.733333	0.64	0.693333	0.706667	0.606667	0.69	0.636667	0.673333	0.676667	0.606667	0.6	0.666667	0.693333	0.66	0.663333	0.63	0.703333	0.773333	0.626667	0.67	0.626667	0.65	0.683333	0.653333	0.646667	0.653333	0.683333	0.653333	0.633333	0.713333	0.73	0.59	0.62	0.65	0.623333	0.703333	0.653333	0.69	0.616667
A*33:07	0.773333	0.776667	0.746667	0.723333	0.8	0.693333	0.746667	0.76	0.716667	0.763333	0.73	0.636667	0.69	0.703333	0.603333	0.686667	0.633333	0.67	0.673333	0.603333	0.596667	0.663333	0.69	0.656667	0.66	0.626667	0.7	0.77	0.623333	0.666667	0.623333	0.646667	0.68	0.65	0.643333	0.65	0.68	0.65	0.63	0.71	0.726667	0.586667	0.616667	0.646667	0.62	0.7	0.65	0.686667	0.613333
A*33:08	0.73	0.733333	0.703333	0.68	0.756667	0.65	0.703333	0.716667	0.673333	0.72	0.686667	0.52	0.573333	0.586667	0.486667	0.57	0.516667	0.553333	0.583333	0.486667	0.48	0.546667	0.573333	0.54	0.543333	0.51	0.583333	0.653333	0.533333	0.55	0.506667	0.53	0.563333	0.533333	0.536667	0.533333	0.563333	0.533333	0.513333	0.593333	0.61	0.47	0.5	0.53	0.503333	0.583333	0.56	0.57	0.496667
A*33:12	0.666667	0.67	0.64	0.616667	0.693333	0.586667	0.64	0.653333	0.543333	0.656667	0.556667	0.463333	0.516667	0.53	0.43	0.513333	0.46	0.496667	0.5	0.43	0.423333	0.49	0.516667	0.483333	0.486667	0.453333	0.526667	0.626667	0.45	0.493333	0.45	0.473333	0.506667	0.476667	0.47	0.476667	0.506667	0.476667	0.456667	0.536667	0.553333	0.413333	0.443333	0.473333	0.446667	0.526667	0.476667	0.513333	0.44
A*34:01	0.62	0.673333	0.613333	0.62	0.646667	0.603333	0.593333	0.606667	0.496667	0.646667	0.51	0.5	0.473333	0.41	0.526667	0.456667	0.483333	0.533333	0.47	0.453333	0.496667	0.513333	0.486667	0.506667	0.523333	0.55	0.563333	0.65	0.513333	0.45	0.486667	0.486667	0.503333	0.5	0.516667	0.513333	0.543333	0.49	0.47	0.573333	0.5	0.45	0.52	0.51	0.456667	0.483333	0.513333	0.5	0.503333
A*34:02	0.576667	0.63	0.593333	0.526667	0.603333	0.523333	0.55	0.563333	0.453333	0.566667	0.493333	0.486667	0.54	0.476667	0.473333	0.523333	0.47	0.52	0.51	0.44	0.483333	0.513333	0.486667	0.493333	0.51	0.496667	0.55	0.65	0.473333	0.516667	0.473333	0.473333	0.503333	0.486667	0.493333	0.5	0.53	0.476667	0.456667	0.56	0.5	0.436667	0.506667	0.496667	0.456667	0.55	0.5	0.536667	0.49
A*34:03	0.566667	0.62	0.583333	0.516667	0.593333	0.513333	0.54	0.553333	0.443333	0.556667	0.483333	0.476667	0.53	0.49	0.463333	0.513333	0.46	0.51	0.5	0.43	0.473333	0.503333	0.476667	0.483333	0.5	0.486667	0.54	0.64	0.463333	0.506667	0.463333	0.486667	0.493333	0.476667	0.483333	0.49	0.52	0.466667	0.446667	0.55	0.513333	0.426667	0.496667	0.486667	0.446667	0.54	0.49	0.526667	0.48
A*34:04	0.573333	0.626667	0.59	0.523333	0.6	0.52	0.546667	0.56	0.45	0.563333	0.49	0.483333	0.536667	0.473333	0.47	0.52	0.466667	0.516667	0.506667	0.436667	0.48	0.51	0.483333	0.49	0.506667	0.493333	0.546667	0.646667	0.47	0.513333	0.47	0.47	0.5	0.453333	0.49	0.496667	0.526667	0.473333	0.453333	0.556667	0.496667	0.433333	0.503333	0.493333	0.453333	0.546667	0.496667	0.533333	0.486667
A*34:05	0.63	0.683333	0.623333	0.63	0.656667	0.613333	0.603333	0.616667	0.506667	0.656667	0.52	0.51	0.483333	0.42	0.536667	0.466667	0.493333	0.543333	0.48	0.463333	0.506667	0.523333	0.496667	0.516667	0.533333	0.56	0.573333	0.66	0.523333	0.46	0.496667	0.496667	0.513333	0.51	0.526667	0.523333	0.553333	0.5	0.48	0.583333	0.51	0.46	0.53	0.52	0.466667	0.493333	0.523333	0.51	0.513333
A*36:01	0.13	0.196667	0.146667	0.186667	0.156667	0.17	0.103333	0.156667	0.306667	0.15	0.346667	0.636667	0.64	0.626667	0.623333	0.653333	0.65	0.67	0.64	0.62	0.633333	0.616667	0.616667	0.673333	0.66	0.646667	0.7	0.576667	0.623333	0.616667	0.623333	0.646667	0.603333	0.666667	0.643333	0.65	0.68	0.65	0.63	0.71	0.653333	0.586667	0.656667	0.646667	0.59	0.65	0.64	0.61	0.67
A*36:02	0.15	0.216667	0.166667	0.176667	0.176667	0.16	0.123333	0.176667	0.326667	0.17	0.366667	0.626667	0.63	0.616667	0.613333	0.643333	0.64	0.66	0.63	0.61	0.623333	0.606667	0.606667	0.663333	0.65	0.636667	0.69	0.566667	0.613333	0.606667	0.613333	0.636667	0.593333	0.656667	0.633333	0.64	0.67	0.64	0.62	0.7	0.643333	0.576667	0.646667	0.636667	0.58	0.64	0.63	0.6	0.66
A*36:03	0.163333	0.23	0.136667	0.22	0.19	0.203333	0.136667	0.19	0.34	0.183333	0.38	0.64	0.616667	0.63	0.606667	0.63	0.653333	0.673333	0.616667	0.623333	0.636667	0.62	0.62	0.65	0.663333	0.603333	0.703333	0.58	0.626667	0.62	0.626667	0.65	0.606667	0.67	0.646667	0.653333	0.683333	0.653333	0.633333	0.713333	0.656667	0.59	0.66	0.65	0.593333	0.626667	0.643333	0.613333	0.673333
A*36:04	0.0966667	0.163333	0.113333	0.153333	0.123333	0.196667	0.13	0.123333	0.273333	0.116667	0.313333	0.663333	0.666667	0.653333	0.65	0.68	0.676667	0.696667	0.666667	0.646667	0.66	0.643333	0.643333	0.7	0.663333	0.673333	0.726667	0.603333	0.65	0.643333	0.65	0.673333	0.63	0.693333	0.67	0.676667	0.706667	0.676667	0.656667	0.736667	0.62	0.613333	0.683333	0.673333	0.616667	0.676667	0.666667	0.636667	0.696667
A*36:05	0.246667	0.313333	0.263333	0.303333	0.273333	0.286667	0.22	0.273333	0.253333	0.266667	0.293333	0.583333	0.586667	0.573333	0.57	0.6	0.596667	0.616667	0.586667	0.566667	0.58	0.563333	0.563333	0.62	0.606667	0.593333	0.646667	0.57	0.57	0.563333	0.57	0.593333	0.55	0.613333	0.59	0.596667	0.626667	0.596667	0.576667	0.656667	0.6	0.533333	0.603333	0.593333	0.536667	0.596667	0.586667	0.556667	0.616667
A*43:01	0.523333	0.576667	0.516667	0.523333	0.55	0.566667	0.556667	0.51	0.4	0.55	0.413333	0.526667	0.5	0.436667	0.553333	0.483333	0.51	0.56	0.47	0.48	0.523333	0.54	0.513333	0.533333	0.526667	0.576667	0.59	0.676667	0.513333	0.476667	0.513333	0.513333	0.53	0.526667	0.533333	0.54	0.57	0.54	0.52	0.6	0.466667	0.476667	0.546667	0.536667	0.483333	0.51	0.543333	0.526667	0.53
A*66:01	0.55	0.603333	0.543333	0.55	0.576667	0.593333	0.583333	0.536667	0.426667	0.576667	0.44	0.516667	0.49	0.426667	0.543333	0.473333	0.5	0.55	0.46	0.47	0.513333	0.53	0.503333	0.523333	0.516667	0.566667	0.58	0.666667	0.503333	0.466667	0.503333	0.503333	0.52	0.516667	0.523333	0.53	0.56	0.506667	0.486667	0.59	0.456667	0.466667	0.536667	0.526667	0.473333	0.5	0.53	0.516667	0.52
A*66:02	0.603333	0.656667	0.596667	0.603333	0.63	0.61	0.6	0.59	0.48	0.63	0.493333	0.496667	0.47	0.406667	0.523333	0.453333	0.48	0.53	0.44	0.45	0.493333	0.51	0.483333	0.503333	0.473333	0.546667	0.56	0.646667	0.483333	0.446667	0.483333	0.483333	0.5	0.496667	0.503333	0.51	0.54	0.486667	0.466667	0.57	0.473333	0.446667	0.516667	0.506667	0.453333	0.48	0.51	0.496667	0.5
A*66:03	0.59	0.643333	0.583333	0.59	0.616667	0.596667	0.586667	0.576667	0.466667	0.616667	0.48	0.483333	0.456667	0.393333	0.51	0.44	0.466667	0.516667	0.426667	0.436667	0.48	0.496667	0.47	0.49	0.46	0.533333	0.546667	0.633333	0.47	0.433333	0.47	0.47	0.486667	0.483333	0.49	0.496667	0.526667	0.496667	0.476667	0.556667	0.46	0.433333	0.503333	0.493333	0.44	0.466667	0.496667	0.483333	0.486667
A*66:04	0.583333	0.636667	0.576667	0.583333	0.61	0.626667	0.616667	0.57	0.46	0.61	0.473333	0.55	0.523333	0.46	0.576667	0.506667	0.533333	0.583333	0.493333	0.503333	0.546667	0.563333	0.536667	0.556667	0.55	0.6	0.613333	0.7	0.536667	0.5	0.536667	0.536667	0.553333	0.55	0.556667	0.563333	0.593333	0.54	0.52	0.623333	0.49	0.5	0.57	0.56	0.506667	0.533333	0.563333	0.55	0.553333
A*66:06	0.533333	0.586667	0.526667	0.483333	0.56	0.513333	0.566667	0.52	0.41	0.523333	0.423333	0.423333	0.476667	0.466667	0.45	0.46	0.406667	0.456667	0.446667	0.376667	0.42	0.45	0.476667	0.43	0.423333	0.473333	0.486667	0.586667	0.41	0.453333	0.41	0.41	0.466667	0.423333	0.43	0.436667	0.466667	0.413333	0.393333	0.496667	0.43	0.373333	0.443333	0.433333	0.393333	0.486667	0.436667	0.473333	0.426667
A*66:07	0.54	0.593333	0.533333	0.54	0.566667	0.583333	0.573333	0.526667	0.416667	0.566667	0.43	0.506667	0.48	0.416667	0.533333	0.463333	0.49	0.54	0.45	0.46	0.503333	0.52	0.493333	0.513333	0.506667	0.556667	0.57	0.656667	0.493333	0.456667	0.493333	0.493333	0.51	0.506667	0.513333	0.52	0.55	0.496667	0.476667	0.58	0.446667	0.456667	0.526667	0.516667	0.463333	0.49	0.52	0.506667	0.51
A*66:09	0.523333	0.576667	0.516667	0.523333	0.55	0.566667	0.556667	0.51	0.4	0.55	0.413333	0.473333	0.456667	0.383333	0.5	0.44	0.456667	0.506667	0.426667	0.426667	0.47	0.486667	0.46	0.49	0.473333	0.533333	0.536667	0.623333	0.46	0.423333	0.46	0.46	0.476667	0.473333	0.48	0.486667	0.516667	0.463333	0.443333	0.546667	0.413333	0.423333	0.493333	0.483333	0.43	0.466667	0.486667	0.473333	0.476667
A*66:13	0.57	0.623333	0.563333	0.57	0.596667	0.613333	0.603333	0.556667	0.446667	0.596667	0.46	0.536667	0.51	0.446667	0.563333	0.493333	0.52	0.57	0.48	0.49	0.533333	0.55	0.523333	0.543333	0.536667	0.586667	0.6	0.686667	0.523333	0.486667	0.523333	0.523333	0.54	0.536667	0.543333	0.55	0.58	0.526667	0.506667	0.61	0.476667	0.486667	0.556667	0.546667	0.493333	0.52	0.55	0.536667	0.54
A*66:14	0.536667	0.59	0.53	0.536667	0.563333	0.58	0.57	0.523333	0.413333	0.563333	0.426667	0.503333	0.476667	0.413333	0.53	0.46	0.486667	0.536667	0.446667	0.456667	0.5	0.516667	0.49	0.51	0.503333	0.553333	0.566667	0.653333	0.49	0.453333	0.49	0.49	0.506667	0.503333	0.51	0.516667	0.546667	0.493333	0.473333	0.576667	0.443333	0.453333	0.523333	0.513333	0.46	0.486667	0.516667	0.503333	0.506667
A*68:01	0.596667	0.65	0.57	0.596667	0.623333	0.553333	0.57	0.583333	0.473333	0.623333	0.513333	0.366667	0.34	0.353333	0.333333	0.323333	0.35	0.4	0.31	0.32	0.363333	0.38	0.406667	0.373333	0.39	0.356667	0.43	0.593333	0.353333	0.316667	0.38	0.376667	0.396667	0.366667	0.373333	0.38	0.41	0.356667	0.336667	0.44	0.443333	0.353333	0.386667	0.376667	0.4	0.35	0.38	0.366667	0.37
A*68:02	0.656667	0.71	0.65	0.656667	0.683333	0.613333	0.63	0.643333	0.533333	0.683333	0.446667	0.296667	0.27	0.283333	0.323333	0.253333	0.28	0.33	0.24	0.25	0.293333	0.31	0.336667	0.303333	0.32	0.346667	0.36	0.523333	0.283333	0.246667	0.31	0.306667	0.326667	0.296667	0.303333	0.31	0.34	0.286667	0.266667	0.37	0.373333	0.283333	0.316667	0.306667	0.33	0.28	0.31	0.296667	0.3
A*68:03	0.583333	0.636667	0.556667	0.583333	0.61	0.54	0.556667	0.57	0.46	0.61	0.5	0.353333	0.326667	0.34	0.32	0.31	0.336667	0.386667	0.296667	0.306667	0.35	0.366667	0.393333	0.36	0.376667	0.343333	0.416667	0.58	0.34	0.303333	0.366667	0.363333	0.383333	0.353333	0.36	0.366667	0.396667	0.366667	0.346667	0.426667	0.43	0.34	0.373333	0.363333	0.386667	0.336667	0.366667	0.353333	0.356667
A*68:04	0.586667	0.64	0.56	0.586667	0.613333	0.543333	0.56	0.573333	0.463333	0.613333	0.503333	0.356667	0.33	0.343333	0.323333	0.313333	0.34	0.39	0.3	0.31	0.316667	0.37	0.396667	0.363333	0.38	0.346667	0.42	0.583333	0.343333	0.306667	0.37	0.366667	0.386667	0.356667	0.363333	0.37	0.4	0.37	0.35	0.43	0.433333	0.343333	0.376667	0.366667	0.39	0.34	0.37	0.356667	0.36
A*68:05	0.603333	0.656667	0.576667	0.603333	0.63	0.56	0.576667	0.59	0.48	0.63	0.52	0.326667	0.3	0.313333	0.293333	0.283333	0.31	0.36	0.27	0.28	0.37	0.34	0.366667	0.333333	0.35	0.316667	0.39	0.553333	0.313333	0.276667	0.34	0.336667	0.356667	0.326667	0.333333	0.34	0.37	0.34	0.366667	0.4	0.403333	0.313333	0.346667	0.336667	0.36	0.31	0.386667	0.326667	0.33
A*68:06	0.65	0.703333	0.623333	0.65	0.676667	0.606667	0.623333	0.636667	0.526667	0.676667	0.503333	0.356667	0.33	0.343333	0.323333	0.313333	0.34	0.39	0.3	0.31	0.353333	0.37	0.396667	0.363333	0.38	0.346667	0.42	0.583333	0.343333	0.306667	0.37	0.366667	0.386667	0.356667	0.363333	0.37	0.4	0.346667	0.326667	0.43	0.433333	0.343333	0.376667	0.366667	0.39	0.34	0.37	0.356667	0.36
A*68:07	0.616667	0.67	0.59	0.616667	0.643333	0.573333	0.59	0.603333	0.493333	0.643333	0.496667	0.35	0.323333	0.336667	0.316667	0.306667	0.333333	0.383333	0.293333	0.303333	0.346667	0.363333	0.39	0.356667	0.373333	0.34	0.413333	0.576667	0.336667	0.3	0.363333	0.36	0.38	0.35	0.356667	0.363333	0.393333	0.34	0.32	0.423333	0.426667	0.336667	0.37	0.36	0.383333	0.333333	0.363333	0.35	0.353333
A*68:08	0.616667	0.67	0.59	0.566667	0.643333	0.536667	0.59	0.603333	0.493333	0.606667	0.533333	0.336667	0.39	0.403333	0.303333	0.373333	0.32	0.37	0.36	0.29	0.333333	0.363333	0.39	0.343333	0.36	0.326667	0.4	0.576667	0.323333	0.366667	0.35	0.346667	0.38	0.336667	0.343333	0.35	0.38	0.326667	0.306667	0.41	0.426667	0.323333	0.356667	0.346667	0.383333	0.4	0.35	0.386667	0.34
A*68:10	0.58	0.633333	0.553333	0.58	0.606667	0.536667	0.553333	0.566667	0.456667	0.606667	0.496667	0.34	0.313333	0.326667	0.306667	0.296667	0.323333	0.373333	0.283333	0.293333	0.336667	0.353333	0.38	0.346667	0.363333	0.33	0.403333	0.566667	0.326667	0.29	0.353333	0.35	0.37	0.34	0.346667	0.353333	0.383333	0.33	0.31	0.413333	0.416667	0.326667	0.36	0.35	0.373333	0.323333	0.34	0.34	0.343333
A*68:12	0.576667	0.63	0.55	0.576667	0.603333	0.533333	0.55	0.563333	0.453333	0.603333	0.493333	0.383333	0.356667	0.37	0.35	0.34	0.366667	0.416667	0.326667	0.336667	0.38	0.396667	0.423333	0.39	0.406667	0.373333	0.446667	0.573333	0.37	0.333333	0.396667	0.393333	0.413333	0.383333	0.39	0.396667	0.426667	0.373333	0.353333	0.456667	0.46	0.333333	0.403333	0.393333	0.38	0.366667	0.396667	0.383333	0.386667
A*68:13	0.583333	0.636667	0.556667	0.583333	0.61	0.54	0.556667	0.57	0.46	0.61	0.5	0.353333	0.326667	0.34	0.32	0.31	0.336667	0.386667	0.296667	0.306667	0.35	0.366667	0.393333	0.36	0.376667	0.343333	0.416667	0.58	0.34	0.303333	0.366667	0.363333	0.383333	0.353333	0.36	0.366667	0.396667	0.343333	0.323333	0.426667	0.43	0.34	0.373333	0.363333	0.386667	0.336667	0.366667	0.353333	0.356667
A*68:15	0.663333	0.716667	0.656667	0.663333	0.69	0.62	0.636667	0.65	0.54	0.69	0.453333	0.256667	0.23	0.243333	0.283333	0.213333	0.24	0.29	0.2	0.21	0.3	0.27	0.296667	0.263333	0.28	0.306667	0.32	0.483333	0.243333	0.206667	0.27	0.266667	0.286667	0.256667	0.263333	0.27	0.3	0.27	0.296667	0.33	0.333333	0.243333	0.276667	0.266667	0.29	0.24	0.316667	0.256667	0.26
A*68:16	0.63	0.683333	0.603333	0.63	0.656667	0.586667	0.603333	0.616667	0.506667	0.656667	0.546667	0.4	0.373333	0.386667	0.366667	0.356667	0.383333	0.433333	0.343333	0.353333	0.396667	0.413333	0.44	0.406667	0.423333	0.39	0.463333	0.626667	0.386667	0.35	0.413333	0.41	0.43	0.4	0.406667	0.413333	0.443333	0.39	0.37	0.473333	0.476667	0.386667	0.406667	0.41	0.433333	0.383333	0.413333	0.4	0.39
A*68:17	0.626667	0.68	0.6	0.626667	0.653333	0.583333	0.6	0.613333	0.503333	0.653333	0.506667	0.36	0.333333	0.346667	0.326667	0.316667	0.343333	0.393333	0.303333	0.313333	0.356667	0.373333	0.4	0.366667	0.383333	0.35	0.423333	0.586667	0.346667	0.31	0.373333	0.37	0.39	0.36	0.366667	0.373333	0.403333	0.35	0.33	0.433333	0.436667	0.346667	0.38	0.37	0.393333	0.343333	0.373333	0.36	0.363333
A*68:19	0.6	0.653333	0.573333	0.6	0.626667	0.556667	0.573333	0.586667	0.476667	0.626667	0.516667	0.37	0.343333	0.356667	0.336667	0.326667	0.353333	0.403333	0.313333	0.323333	0.366667	0.383333	0.41	0.376667	0.393333	0.36	0.433333	0.596667	0.356667	0.32	0.383333	0.38	0.4	0.37	0.376667	0.383333	0.413333	0.36	0.34	0.443333	0.446667	0.356667	0.39	0.38	0.403333	0.353333	0.383333	0.37	0.373333
A*68:20	0.623333	0.676667	0.596667	0.623333	0.65	0.58	0.596667	0.61	0.5	0.65	0.54	0.346667	0.32	0.333333	0.313333	0.303333	0.33	0.38	0.29	0.3	0.39	0.36	0.386667	0.353333	0.37	0.336667	0.41	0.573333	0.333333	0.296667	0.36	0.356667	0.376667	0.346667	0.353333	0.36	0.39	0.36	0.386667	0.42	0.423333	0.333333	0.366667	0.356667	0.38	0.33	0.406667	0.346667	0.35
A*68:23	0.61	0.663333	0.603333	0.61	0.636667	0.566667	0.583333	0.596667	0.486667	0.636667	0.526667	0.34	0.313333	0.326667	0.366667	0.296667	0.323333	0.373333	0.283333	0.293333	0.336667	0.353333	0.38	0.346667	0.363333	0.39	0.403333	0.566667	0.326667	0.29	0.353333	0.35	0.37	0.34	0.346667	0.353333	0.383333	0.33	0.31	0.413333	0.416667	0.326667	0.36	0.35	0.373333	0.323333	0.353333	0.34	0.343333
A*68:24	0.606667	0.66	0.58	0.606667	0.633333	0.563333	0.58	0.593333	0.483333	0.633333	0.523333	0.376667	0.35	0.363333	0.343333	0.333333	0.36	0.41	0.32	0.33	0.373333	0.39	0.416667	0.383333	0.4	0.366667	0.44	0.603333	0.363333	0.326667	0.39	0.386667	0.406667	0.376667	0.383333	0.39	0.42	0.366667	0.346667	0.45	0.453333	0.363333	0.396667	0.386667	0.41	0.36	0.39	0.376667	0.38
A*68:25	0.6	0.653333	0.573333	0.6	0.626667	0.556667	0.573333	0.586667	0.476667	0.626667	0.516667	0.406667	0.38	0.393333	0.373333	0.363333	0.39	0.44	0.35	0.36	0.403333	0.42	0.446667	0.413333	0.43	0.396667	0.47	0.633333	0.393333	0.356667	0.42	0.416667	0.436667	0.406667	0.413333	0.42	0.45	0.396667	0.376667	0.48	0.483333	0.393333	0.426667	0.416667	0.44	0.39	0.42	0.406667	0.41
A*68:27	0.643333	0.696667	0.636667	0.643333	0.67	0.6	0.616667	0.63	0.52	0.67	0.433333	0.283333	0.256667	0.27	0.31	0.24	0.266667	0.316667	0.226667	0.236667	0.28	0.296667	0.323333	0.29	0.306667	0.333333	0.346667	0.51	0.27	0.233333	0.296667	0.293333	0.313333	0.283333	0.29	0.296667	0.326667	0.273333	0.253333	0.356667	0.36	0.27	0.303333	0.293333	0.316667	0.266667	0.296667	0.283333	0.286667
A*68:28	0.623333	0.676667	0.616667	0.65	0.65	0.573333	0.596667	0.61	0.5	0.643333	0.413333	0.29	0.293333	0.306667	0.316667	0.276667	0.273333	0.323333	0.263333	0.243333	0.286667	0.27	0.296667	0.296667	0.313333	0.34	0.353333	0.483333	0.276667	0.27	0.303333	0.3	0.286667	0.29	0.296667	0.303333	0.333333	0.28	0.26	0.363333	0.333333	0.276667	0.31	0.3	0.29	0.303333	0.303333	0.263333	0.293333
A*68:30	0.596667	0.65	0.57	0.596667	0.623333	0.553333	0.57	0.583333	0.473333	0.623333	0.513333	0.32	0.293333	0.306667	0.286667	0.276667	0.303333	0.353333	0.263333	0.273333	0.316667	0.333333	0.36	0.326667	0.343333	0.31	0.383333	0.546667	0.306667	0.27	0.333333	0.33	0.35	0.32	0.326667	0.333333	0.363333	0.31	0.29	0.393333	0.396667	0.306667	0.34	0.33	0.353333	0.303333	0.36	0.32	0.323333
A*68:31	0.643333	0.696667	0.636667	0.643333	0.67	0.6	0.616667	0.63	0.52	0.67	0.433333	0.283333	0.256667	0.27	0.31	0.24	0.266667	0.316667	0.226667	0.236667	0.28	0.296667	0.323333	0.29	0.306667	0.333333	0.346667	0.51	0.27	0.233333	0.296667	0.293333	0.313333	0.283333	0.29	0.296667	0.326667	0.296667	0.276667	0.356667	0.36	0.27	0.303333	0.293333	0.316667	0.266667	0.296667	0.283333	0.286667
A*68:36	0.743333	0.796667	0.716667	0.743333	0.77	0.7	0.716667	0.73	0.62	0.77	0.66	0.553333	0.526667	0.54	0.52	0.51	0.536667	0.586667	0.496667	0.506667	0.55	0.566667	0.593333	0.56	0.576667	0.543333	0.616667	0.78	0.54	0.503333	0.566667	0.563333	0.583333	0.553333	0.56	0.566667	0.596667	0.543333	0.523333	0.626667	0.63	0.54	0.573333	0.563333	0.586667	0.536667	0.566667	0.553333	0.556667
A*68:39	0.596667	0.65	0.57	0.596667	0.623333	0.553333	0.57	0.583333	0.473333	0.623333	0.513333	0.366667	0.34	0.353333	0.333333	0.323333	0.35	0.4	0.31	0.32	0.363333	0.38	0.406667	0.373333	0.39	0.356667	0.43	0.593333	0.353333	0.316667	0.38	0.376667	0.396667	0.366667	0.373333	0.38	0.41	0.356667	0.336667	0.44	0.443333	0.353333	0.386667	0.376667	0.4	0.35	0.38	0.366667	0.37
A*68:40	0.666667	0.72	0.66	0.666667	0.693333	0.623333	0.64	0.653333	0.543333	0.693333	0.456667	0.306667	0.28	0.293333	0.333333	0.263333	0.29	0.34	0.25	0.26	0.303333	0.32	0.346667	0.313333	0.33	0.356667	0.37	0.533333	0.293333	0.256667	0.32	0.316667	0.336667	0.306667	0.313333	0.32	0.35	0.296667	0.276667	0.38	0.383333	0.293333	0.326667	0.316667	0.34	0.29	0.32	0.306667	0.31
A*68:45	0.623333	0.623333	0.596667	0.623333	0.65	0.58	0.596667	0.61	0.5	0.65	0.54	0.393333	0.366667	0.38	0.36	0.366667	0.393333	0.426667	0.353333	0.363333	0.39	0.406667	0.433333	0.416667	0.416667	0.383333	0.456667	0.62	0.38	0.343333	0.406667	0.403333	0.423333	0.41	0.4	0.406667	0.436667	0.383333	0.363333	0.466667	0.47	0.38	0.413333	0.403333	0.443333	0.376667	0.406667	0.393333	0.413333
A*68:72	0.593333	0.646667	0.566667	0.593333	0.62	0.55	0.566667	0.58	0.47	0.62	0.51	0.363333	0.336667	0.35	0.33	0.32	0.346667	0.396667	0.306667	0.316667	0.36	0.376667	0.403333	0.37	0.386667	0.353333	0.426667	0.59	0.35	0.313333	0.376667	0.373333	0.393333	0.363333	0.37	0.376667	0.406667	0.353333	0.333333	0.436667	0.44	0.35	0.383333	0.373333	0.396667	0.346667	0.376667	0.363333	0.366667
A*69:01	0.73	0.783333	0.723333	0.68	0.756667	0.65	0.703333	0.716667	0.606667	0.72	0.52	0.15	0.213333	0.216667	0.176667	0.196667	0.133333	0.183333	0.183333	0.22	0.146667	0.176667	0.203333	0.166667	0.173333	0.21	0.213333	0.39	0.136667	0.18	0.163333	0.16	0.193333	0.15	0.156667	0.163333	0.193333	0.14	0.12	0.223333	0.24	0.253333	0.17	0.16	0.196667	0.223333	0.163333	0.2	0.153333
A*74:01	0.7	0.766667	0.673333	0.65	0.726667	0.62	0.673333	0.686667	0.613333	0.69	0.626667	0.58	0.633333	0.646667	0.546667	0.646667	0.593333	0.613333	0.633333	0.563333	0.576667	0.606667	0.633333	0.616667	0.603333	0.57	0.643333	0.743333	0.566667	0.61	0.566667	0.59	0.623333	0.61	0.586667	0.593333	0.623333	0.593333	0.573333	0.653333	0.67	0.53	0.56	0.59	0.58	0.643333	0.583333	0.63	0.573333
A*74:03	0.713333	0.78	0.686667	0.663333	0.74	0.633333	0.686667	0.7	0.626667	0.703333	0.64	0.593333	0.646667	0.66	0.56	0.66	0.606667	0.626667	0.646667	0.576667	0.59	0.62	0.646667	0.63	0.616667	0.583333	0.656667	0.756667	0.58	0.623333	0.58	0.603333	0.636667	0.623333	0.6	0.606667	0.636667	0.606667	0.586667	0.666667	0.683333	0.543333	0.573333	0.603333	0.593333	0.656667	0.596667	0.643333	0.586667
A*74:04	0.596667	0.663333	0.57	0.546667	0.623333	0.516667	0.57	0.583333	0.473333	0.586667	0.486667	0.356667	0.41	0.423333	0.323333	0.423333	0.37	0.39	0.436667	0.34	0.353333	0.383333	0.41	0.393333	0.38	0.346667	0.42	0.52	0.37	0.386667	0.343333	0.366667	0.4	0.386667	0.373333	0.37	0.4	0.37	0.35	0.43	0.446667	0.306667	0.336667	0.366667	0.356667	0.42	0.396667	0.406667	0.35
A*74:05	0.566667	0.633333	0.54	0.516667	0.593333	0.486667	0.54	0.553333	0.443333	0.556667	0.456667	0.41	0.463333	0.476667	0.376667	0.476667	0.423333	0.443333	0.463333	0.393333	0.4	0.436667	0.463333	0.446667	0.433333	0.4	0.473333	0.573333	0.396667	0.44	0.396667	0.42	0.453333	0.44	0.416667	0.423333	0.453333	0.423333	0.403333	0.483333	0.5	0.36	0.39	0.42	0.41	0.463333	0.413333	0.46	0.403333
A*74:06	0.683333	0.75	0.656667	0.633333	0.71	0.603333	0.656667	0.67	0.596667	0.673333	0.61	0.516667	0.57	0.583333	0.483333	0.583333	0.53	0.55	0.57	0.5	0.56	0.543333	0.57	0.553333	0.54	0.506667	0.58	0.68	0.503333	0.546667	0.503333	0.526667	0.56	0.546667	0.523333	0.53	0.56	0.53	0.556667	0.59	0.606667	0.466667	0.496667	0.526667	0.516667	0.58	0.566667	0.566667	0.51
A*74:07	0.586667	0.653333	0.56	0.536667	0.613333	0.506667	0.56	0.573333	0.5	0.576667	0.513333	0.466667	0.52	0.533333	0.433333	0.533333	0.48	0.5	0.52	0.45	0.426667	0.493333	0.52	0.503333	0.49	0.456667	0.53	0.63	0.453333	0.496667	0.453333	0.476667	0.51	0.496667	0.473333	0.48	0.51	0.48	0.46	0.54	0.556667	0.416667	0.446667	0.476667	0.466667	0.53	0.47	0.516667	0.46
A*74:08	0.563333	0.63	0.536667	0.513333	0.59	0.483333	0.536667	0.55	0.44	0.553333	0.453333	0.406667	0.46	0.473333	0.373333	0.473333	0.42	0.44	0.46	0.39	0.403333	0.433333	0.46	0.443333	0.43	0.396667	0.47	0.57	0.393333	0.436667	0.393333	0.416667	0.45	0.436667	0.413333	0.42	0.45	0.42	0.4	0.48	0.496667	0.356667	0.403333	0.416667	0.406667	0.47	0.41	0.456667	0.416667
A*74:09	0.726667	0.793333	0.7	0.676667	0.753333	0.646667	0.7	0.713333	0.64	0.716667	0.653333	0.606667	0.66	0.673333	0.573333	0.673333	0.62	0.64	0.66	0.59	0.603333	0.633333	0.66	0.643333	0.63	0.596667	0.67	0.77	0.593333	0.636667	0.593333	0.616667	0.65	0.636667	0.613333	0.62	0.65	0.62	0.6	0.68	0.696667	0.556667	0.586667	0.616667	0.606667	0.67	0.61	0.656667	0.6
A*74:10	0.513333	0.58	0.486667	0.463333	0.54	0.433333	0.486667	0.5	0.39	0.503333	0.403333	0.436667	0.49	0.503333	0.403333	0.503333	0.45	0.47	0.49	0.42	0.433333	0.463333	0.49	0.473333	0.46	0.426667	0.5	0.6	0.423333	0.466667	0.423333	0.446667	0.48	0.466667	0.443333	0.45	0.48	0.45	0.43	0.51	0.526667	0.386667	0.416667	0.446667	0.436667	0.5	0.44	0.486667	0.43
A*74:11	0.723333	0.79	0.696667	0.673333	0.75	0.643333	0.696667	0.71	0.636667	0.713333	0.65	0.603333	0.656667	0.67	0.57	0.67	0.616667	0.636667	0.656667	0.586667	0.6	0.63	0.656667	0.64	0.626667	0.593333	0.666667	0.766667	0.59	0.633333	0.59	0.613333	0.646667	0.633333	0.61	0.616667	0.646667	0.616667	0.596667	0.676667	0.693333	0.553333	0.583333	0.613333	0.603333	0.666667	0.606667	0.653333	0.596667
A*74:13	0.566667	0.633333	0.54	0.516667	0.593333	0.486667	0.54	0.553333	0.443333	0.556667	0.456667	0.41	0.463333	0.476667	0.376667	0.476667	0.423333	0.443333	0.463333	0.393333	0.406667	0.436667	0.463333	0.446667	0.433333	0.4	0.473333	0.573333	0.396667	0.44	0.396667	0.42	0.453333	0.44	0.416667	0.423333	0.453333	0.4	0.38	0.483333	0.5	0.36	0.39	0.42	0.41	0.473333	0.413333	0.46	0.403333
A*74:15	0.566667	0.633333	0.54	0.516667	0.593333	0.486667	0.54	0.553333	0.443333	0.556667	0.456667	0.41	0.463333	0.476667	0.376667	0.476667	0.423333	0.443333	0.463333	0.393333	0.406667	0.436667	0.463333	0.446667	0.433333	0.4	0.473333	0.573333	0.396667	0.44	0.396667	0.42	0.453333	0.44	0.416667	0.423333	0.453333	0.423333	0.403333	0.483333	0.5	0.36	0.39	0.42	0.41	0.473333	0.413333	0.46	0.403333
A*80:01	0.516667	0.583333	0.533333	0.466667	0.543333	0.48	0.513333	0.503333	0.563333	0.506667	0.603333	0.753333	0.806667	0.79	0.74	0.82	0.766667	0.786667	0.806667	0.736667	0.766667	0.78	0.776667	0.79	0.73	0.763333	0.816667	0.66	0.74	0.783333	0.74	0.763333	0.776667	0.766667	0.76	0.766667	0.796667	0.766667	0.763333	0.703333	0.79	0.703333	0.733333	0.763333	0.753333	0.816667	0.77	0.803333	0.746667
[truncated: 265 more columns]

## Sheet: B_sequence_distance_matrix
	B*07:02	B*07:03	B*07:04	B*07:05	B*07:07	B*07:09	B*07:10	B*07:12	B*07:13	B*07:14	B*07:15	B*07:16	B*07:18	B*07:20	B*07:22	B*07:23	B*07:26	B*07:28	B*07:33	B*07:36	B*07:40	B*07:42	B*07:43	B*07:48	B*07:51	B*07:80	B*07:107	B*07:112	B*07:114	B*07:115	B*07:116	B*07:117	B*07:122	B*08:01	B*08:02	B*08:04	B*08:07	B*08:09	B*08:12	B*08:13	B*08:16	B*08:18	B*08:20	B*08:23	B*08:29	B*08:34	B*08:36	B*08:37	B*08:68
B*07:02	0	0.105431	0.0990415	0.0766773	0.0798722	0.105431	0.0958466	0.127796	0.194888	0.13738	0.102236	0.140575	0.111821	0.14377	0.0702875	0.0958466	0.102236	0.284345	0.0958466	0.198083	0.233227	0.0894569	0.271565	0.127796	0.0798722	0.255591	0.214058	0.255591	0.0766773	0.258786	0.223642	0.217252	0.230032	0.300319	0.42492	0.472843	0.440895	0.335463	0.316294	0.450479	0.476038	0.316294	0.239617	0.335463	0.319489	0.479233	0.319489	0.335463	0.485623
B*07:03	0.105431	0	0.140575	0.118211	0.121406	0.146965	0.13738	0.169329	0.226837	0.178914	0.14377	0.0958466	0.153355	0.185304	0.111821	0.13738	0.14377	0.325879	0.13738	0.239617	0.27476	0.13099	0.313099	0.169329	0.121406	0.297125	0.255591	0.297125	0.118211	0.300319	0.255591	0.258786	0.271565	0.255591	0.380192	0.428115	0.396166	0.290735	0.271565	0.405751	0.43131	0.271565	0.194888	0.290735	0.27476	0.434505	0.27476	0.290735	0.440895
B*07:04	0.0990415	0.140575	0	0.111821	0.115016	0.140575	0.13099	0.162939	0.230032	0.172524	0.13738	0.175719	0.146965	0.178914	0.105431	0.13099	0.105431	0.319489	0.13099	0.233227	0.268371	0.124601	0.27476	0.13099	0.115016	0.258786	0.249201	0.290735	0.111821	0.29393	0.258786	0.252396	0.265176	0.271565	0.396166	0.444089	0.412141	0.306709	0.28754	0.453674	0.447284	0.28754	0.27476	0.306709	0.290735	0.450479	0.290735	0.306709	0.456869
B*07:05	0.0766773	0.118211	0.111821	0	0.0926518	0.118211	0.108626	0.140575	0.207668	0.15016	0.115016	0.153355	0.124601	0.15655	0.0830671	0.108626	0.115016	0.28115	0.108626	0.210863	0.217252	0.102236	0.268371	0.140575	0.0926518	0.239617	0.210863	0.239617	0.0894569	0.242812	0.220447	0.214058	0.226837	0.300319	0.42492	0.456869	0.4377	0.335463	0.316294	0.434505	0.460064	0.316294	0.239617	0.335463	0.319489	0.463259	0.319489	0.348243	0.469649
B*07:07	0.0798722	0.121406	0.115016	0.0926518	0	0.121406	0.111821	0.102236	0.210863	0.111821	0.118211	0.15655	0.086262	0.159744	0.086262	0.111821	0.118211	0.300319	0.111821	0.214058	0.249201	0.105431	0.28754	0.14377	0.0958466	0.271565	0.230032	0.271565	0.0926518	0.27476	0.239617	0.233227	0.246006	0.316294	0.440895	0.488818	0.456869	0.351438	0.290735	0.466454	0.450479	0.332268	0.255591	0.351438	0.335463	0.495208	0.335463	0.351438	0.501597
B*07:09	0.105431	0.146965	0.140575	0.118211	0.121406	0	0.13738	0.169329	0.236422	0.178914	0.14377	0.182109	0.153355	0.185304	0.111821	0.13738	0.14377	0.268371	0.13738	0.239617	0.27476	0.13099	0.313099	0.169329	0.121406	0.297125	0.255591	0.297125	0.118211	0.284345	0.265176	0.258786	0.271565	0.341853	0.466454	0.514377	0.482428	0.376997	0.357827	0.492013	0.517572	0.357827	0.28115	0.376997	0.361022	0.520767	0.361022	0.309904	0.527157
B*07:10	0.0958466	0.13738	0.13099	0.108626	0.111821	0.13738	0	0.159744	0.226837	0.169329	0.134185	0.172524	0.14377	0.175719	0.102236	0.127796	0.134185	0.316294	0.127796	0.230032	0.265176	0.121406	0.303514	0.159744	0.111821	0.28754	0.246006	0.28754	0.108626	0.290735	0.255591	0.249201	0.261981	0.335463	0.460064	0.463259	0.476038	0.370607	0.351438	0.485623	0.511182	0.351438	0.27476	0.370607	0.354633	0.514377	0.354633	0.370607	0.520767
B*07:12	0.127796	0.169329	0.162939	0.140575	0.102236	0.169329	0.159744	0	0.258786	0.0926518	0.166134	0.204473	0.0670927	0.207668	0.134185	0.159744	0.166134	0.348243	0.159744	0.261981	0.297125	0.153355	0.335463	0.191693	0.14377	0.319489	0.277955	0.319489	0.140575	0.322684	0.28754	0.28115	0.29393	0.364217	0.488818	0.536741	0.504792	0.396166	0.338658	0.514377	0.498403	0.380192	0.303514	0.399361	0.383387	0.543131	0.383387	0.399361	0.549521
B*07:13	0.194888	0.226837	0.230032	0.207668	0.210863	0.236422	0.226837	0.258786	0	0.268371	0.159744	0.261981	0.242812	0.27476	0.201278	0.226837	0.233227	0.415335	0.226837	0.329073	0.364217	0.220447	0.402556	0.258786	0.210863	0.386581	0.345048	0.386581	0.207668	0.389776	0.345048	0.348243	0.361022	0.421725	0.546326	0.594249	0.5623	0.456869	0.4377	0.571885	0.57508	0.4377	0.361022	0.456869	0.440895	0.600639	0.440895	0.456869	0.607029
B*07:14	0.13738	0.178914	0.172524	0.15016	0.111821	0.178914	0.169329	0.0926518	0.268371	0	0.175719	0.214058	0.0766773	0.217252	0.14377	0.169329	0.175719	0.300319	0.169329	0.271565	0.306709	0.162939	0.345048	0.201278	0.153355	0.329073	0.28754	0.329073	0.15016	0.27476	0.297125	0.290735	0.303514	0.373802	0.498403	0.546326	0.514377	0.405751	0.348243	0.523962	0.507987	0.389776	0.313099	0.408946	0.392971	0.552716	0.392971	0.408946	0.559105
B*07:15	0.102236	0.14377	0.13738	0.115016	0.118211	0.14377	0.134185	0.166134	0.159744	0.175719	0	0.178914	0.15016	0.182109	0.108626	0.134185	0.140575	0.322684	0.134185	0.236422	0.271565	0.127796	0.309904	0.166134	0.118211	0.29393	0.252396	0.29393	0.115016	0.297125	0.261981	0.255591	0.268371	0.338658	0.463259	0.511182	0.479233	0.373802	0.354633	0.488818	0.492013	0.354633	0.277955	0.373802	0.357827	0.517572	0.357827	0.373802	0.523962
B*07:16	0.140575	0.0958466	0.175719	0.153355	0.15655	0.182109	0.172524	0.204473	0.261981	0.214058	0.178914	0	0.188498	0.220447	0.146965	0.172524	0.178914	0.361022	0.172524	0.27476	0.309904	0.166134	0.348243	0.204473	0.15655	0.332268	0.290735	0.332268	0.153355	0.335463	0.290735	0.29393	0.306709	0.290735	0.415335	0.463259	0.43131	0.325879	0.306709	0.440895	0.466454	0.306709	0.230032	0.242812	0.309904	0.469649	0.309904	0.325879	0.476038
B*07:18	0.111821	0.153355	0.146965	0.124601	0.086262	0.153355	0.14377	0.0670927	0.242812	0.0766773	0.15016	0.188498	0	0.191693	0.118211	0.14377	0.15016	0.332268	0.14377	0.246006	0.28115	0.13738	0.319489	0.175719	0.127796	0.303514	0.261981	0.303514	0.124601	0.306709	0.271565	0.265176	0.277955	0.348243	0.472843	0.520767	0.488818	0.380192	0.322684	0.498403	0.482428	0.364217	0.28754	0.383387	0.367412	0.527157	0.367412	0.383387	0.533546
B*07:20	0.14377	0.185304	0.178914	0.15655	0.159744	0.185304	0.175719	0.207668	0.27476	0.217252	0.182109	0.220447	0.191693	0	0.15016	0.175719	0.182109	0.364217	0.175719	0.277955	0.313099	0.169329	0.322684	0.207668	0.159744	0.335463	0.29393	0.335463	0.15655	0.338658	0.303514	0.297125	0.309904	0.351438	0.476038	0.523962	0.492013	0.386581	0.367412	0.501597	0.527157	0.367412	0.290735	0.386581	0.370607	0.530351	0.370607	0.386581	0.536741
B*07:22	0.0702875	0.111821	0.105431	0.0830671	0.086262	0.111821	0.102236	0.134185	0.201278	0.14377	0.108626	0.146965	0.118211	0.15016	0	0.102236	0.108626	0.290735	0.102236	0.204473	0.239617	0.0958466	0.277955	0.134185	0.086262	0.261981	0.220447	0.261981	0.0830671	0.265176	0.230032	0.223642	0.236422	0.306709	0.43131	0.479233	0.447284	0.341853	0.322684	0.456869	0.482428	0.322684	0.246006	0.341853	0.325879	0.485623	0.325879	0.341853	0.492013
B*07:23	0.0958466	0.13738	0.13099	0.108626	0.111821	0.13738	0.127796	0.159744	0.226837	0.169329	0.134185	0.172524	0.14377	0.175719	0.102236	0	0.134185	0.316294	0.127796	0.230032	0.265176	0.121406	0.303514	0.159744	0.111821	0.28754	0.246006	0.28754	0.108626	0.290735	0.255591	0.249201	0.261981	0.332268	0.456869	0.504792	0.472843	0.367412	0.348243	0.482428	0.507987	0.348243	0.271565	0.367412	0.351438	0.511182	0.351438	0.367412	0.517572
B*07:26	0.102236	0.14377	0.105431	0.115016	0.118211	0.14377	0.134185	0.166134	0.233227	0.175719	0.140575	0.178914	0.15016	0.182109	0.108626	0.134185	0	0.322684	0.134185	0.236422	0.271565	0.127796	0.236422	0.0926518	0.118211	0.220447	0.252396	0.29393	0.115016	0.297125	0.261981	0.255591	0.268371	0.306709	0.43131	0.479233	0.447284	0.341853	0.322684	0.415335	0.482428	0.322684	0.277955	0.341853	0.325879	0.485623	0.325879	0.341853	0.492013
B*07:28	0.284345	0.325879	0.319489	0.28115	0.300319	0.268371	0.316294	0.348243	0.415335	0.300319	0.322684	0.361022	0.332268	0.364217	0.290735	0.316294	0.322684	0	0.316294	0.41853	0.15016	0.309904	0.188498	0.348243	0.300319	0.172524	0.13099	0.172524	0.297125	0.108626	0.140575	0.134185	0.146965	0.520767	0.645367	0.389776	0.357827	0.555911	0.536741	0.367412	0.392971	0.536741	0.460064	0.555911	0.539936	0.396166	0.539936	0.498403	0.402556
B*07:33	0.0958466	0.13738	0.13099	0.108626	0.111821	0.13738	0.127796	0.159744	0.226837	0.169329	0.134185	0.172524	0.14377	0.175719	0.102236	0.127796	0.134185	0.316294	0	0.230032	0.249201	0.121406	0.303514	0.159744	0.111821	0.28754	0.239617	0.28754	0.108626	0.290735	0.255591	0.249201	0.261981	0.29393	0.41853	0.466454	0.434505	0.329073	0.309904	0.444089	0.469649	0.309904	0.233227	0.329073	0.313099	0.472843	0.313099	0.329073	0.479233
B*07:36	0.198083	0.239617	0.233227	0.210863	0.214058	0.239617	0.230032	0.261981	0.329073	0.271565	0.236422	0.27476	0.246006	0.277955	0.204473	0.230032	0.236422	0.41853	0.230032	0	0.367412	0.223642	0.405751	0.261981	0.214058	0.389776	0.348243	0.389776	0.210863	0.392971	0.357827	0.351438	0.364217	0.434505	0.316294	0.607029	0.57508	0.469649	0.450479	0.584665	0.610224	0.450479	0.373802	0.469649	0.428115	0.58147	0.453674	0.469649	0.619808
B*07:40	0.233227	0.27476	0.268371	0.217252	0.249201	0.27476	0.265176	0.297125	0.364217	0.306709	0.271565	0.309904	0.28115	0.313099	0.239617	0.265176	0.271565	0.15016	0.249201	0.367412	0	0.258786	0.13738	0.297125	0.249201	0.108626	0.0798722	0.108626	0.246006	0.111821	0.0894569	0.0830671	0.0958466	0.440895	0.565495	0.309904	0.290735	0.476038	0.456869	0.28754	0.313099	0.456869	0.380192	0.476038	0.460064	0.316294	0.460064	0.488818	0.322684
B*07:42	0.0894569	0.13099	0.124601	0.102236	0.105431	0.13099	0.121406	0.153355	0.220447	0.162939	0.127796	0.166134	0.13738	0.169329	0.0958466	0.121406	0.127796	0.309904	0.121406	0.223642	0.258786	0	0.297125	0.153355	0.105431	0.28115	0.239617	0.28115	0.102236	0.284345	0.249201	0.242812	0.255591	0.325879	0.450479	0.498403	0.466454	0.361022	0.341853	0.476038	0.501597	0.341853	0.265176	0.361022	0.345048	0.504792	0.345048	0.361022	0.511182
B*07:43	0.271565	0.313099	0.27476	0.268371	0.28754	0.313099	0.303514	0.335463	0.402556	0.345048	0.309904	0.348243	0.319489	0.322684	0.277955	0.303514	0.236422	0.188498	0.303514	0.405751	0.13738	0.297125	0	0.261981	0.28754	0.086262	0.118211	0.159744	0.284345	0.162939	0.127796	0.121406	0.134185	0.43131	0.555911	0.300319	0.268371	0.466454	0.447284	0.236422	0.303514	0.447284	0.402556	0.466454	0.450479	0.306709	0.450479	0.466454	0.313099
B*07:48	0.127796	0.169329	0.13099	0.140575	0.14377	0.169329	0.159744	0.191693	0.258786	0.201278	0.166134	0.204473	0.175719	0.207668	0.134185	0.159744	0.0926518	0.348243	0.159744	0.261981	0.297125	0.153355	0.261981	0	0.118211	0.246006	0.277955	0.319489	0.140575	0.322684	0.28754	0.28115	0.29393	0.28115	0.405751	0.453674	0.421725	0.316294	0.297125	0.389776	0.456869	0.297125	0.303514	0.316294	0.300319	0.460064	0.300319	0.316294	0.466454
B*07:51	0.0798722	0.121406	0.115016	0.0926518	0.0958466	0.121406	0.111821	0.14377	0.210863	0.153355	0.118211	0.15655	0.127796	0.159744	0.086262	0.111821	0.118211	0.300319	0.111821	0.214058	0.249201	0.105431	0.28754	0.118211	0	0.271565	0.230032	0.271565	0.0926518	0.27476	0.239617	0.233227	0.246006	0.290735	0.415335	0.463259	0.43131	0.325879	0.306709	0.440895	0.466454	0.306709	0.255591	0.325879	0.309904	0.469649	0.309904	0.325879	0.476038
B*07:80	0.255591	0.297125	0.258786	0.239617	0.271565	0.297125	0.28754	0.319489	0.386581	0.329073	0.29393	0.332268	0.303514	0.335463	0.261981	0.28754	0.220447	0.172524	0.28754	0.389776	0.108626	0.28115	0.086262	0.246006	0.271565	0	0.102236	0.13099	0.268371	0.134185	0.111821	0.105431	0.118211	0.447284	0.571885	0.316294	0.297125	0.482428	0.463259	0.252396	0.319489	0.463259	0.41853	0.482428	0.466454	0.322684	0.466454	0.495208	0.329073
B*07:107	0.214058	0.255591	0.249201	0.210863	0.230032	0.255591	0.246006	0.277955	0.345048	0.28754	0.252396	0.290735	0.261981	0.29393	0.220447	0.246006	0.252396	0.13099	0.239617	0.348243	0.0798722	0.239617	0.118211	0.277955	0.230032	0.102236	0	0.102236	0.226837	0.105431	0.0702875	0.0638978	0.0766773	0.450479	0.57508	0.319489	0.28754	0.485623	0.466454	0.297125	0.322684	0.466454	0.389776	0.485623	0.469649	0.325879	0.469649	0.485623	0.332268
B*07:112	0.255591	0.297125	0.290735	0.239617	0.271565	0.297125	0.28754	0.319489	0.386581	0.329073	0.29393	0.332268	0.303514	0.335463	0.261981	0.28754	0.29393	0.172524	0.28754	0.389776	0.108626	0.28115	0.159744	0.319489	0.271565	0.13099	0.102236	0	0.268371	0.134185	0.111821	0.105431	0.118211	0.479233	0.603834	0.348243	0.329073	0.514377	0.495208	0.325879	0.351438	0.495208	0.41853	0.514377	0.498403	0.354633	0.498403	0.527157	0.361022
B*07:114	0.0766773	0.118211	0.111821	0.0894569	0.0926518	0.118211	0.108626	0.140575	0.207668	0.15016	0.115016	0.153355	0.124601	0.15655	0.0830671	0.108626	0.115016	0.297125	0.108626	0.210863	0.246006	0.102236	0.284345	0.140575	0.0926518	0.268371	0.226837	0.268371	0	0.271565	0.236422	0.230032	0.242812	0.27476	0.399361	0.447284	0.415335	0.309904	0.290735	0.42492	0.450479	0.290735	0.214058	0.309904	0.29393	0.453674	0.29393	0.309904	0.460064
B*07:115	0.258786	0.300319	0.29393	0.242812	0.27476	0.284345	0.290735	0.322684	0.389776	0.27476	0.297125	0.335463	0.306709	0.338658	0.265176	0.290735	0.297125	0.108626	0.290735	0.392971	0.111821	0.284345	0.162939	0.322684	0.27476	0.134185	0.105431	0.134185	0.271565	0	0.115016	0.108626	0.121406	0.482428	0.607029	0.351438	0.332268	0.517572	0.498403	0.329073	0.354633	0.498403	0.421725	0.517572	0.501597	0.357827	0.501597	0.514377	0.364217
B*07:116	0.223642	0.255591	0.258786	0.220447	0.239617	0.265176	0.255591	0.28754	0.345048	0.297125	0.261981	0.290735	0.271565	0.303514	0.230032	0.255591	0.261981	0.140575	0.255591	0.357827	0.0894569	0.249201	0.127796	0.28754	0.239617	0.111821	0.0702875	0.111821	0.236422	0.115016	0	0.0734824	0.086262	0.450479	0.57508	0.319489	0.28754	0.485623	0.466454	0.297125	0.322684	0.466454	0.389776	0.485623	0.469649	0.325879	0.469649	0.485623	0.332268
B*07:117	0.217252	0.258786	0.252396	0.214058	0.233227	0.258786	0.249201	0.28115	0.348243	0.290735	0.255591	0.29393	0.265176	0.297125	0.223642	0.249201	0.255591	0.134185	0.249201	0.351438	0.0830671	0.242812	0.121406	0.28115	0.233227	0.105431	0.0638978	0.105431	0.230032	0.108626	0.0734824	0	0.0798722	0.453674	0.578275	0.322684	0.290735	0.488818	0.469649	0.300319	0.325879	0.469649	0.392971	0.488818	0.472843	0.329073	0.472843	0.488818	0.335463
B*07:122	0.230032	0.271565	0.265176	0.226837	0.246006	0.271565	0.261981	0.29393	0.361022	0.303514	0.268371	0.306709	0.277955	0.309904	0.236422	0.261981	0.268371	0.146965	0.261981	0.364217	0.0958466	0.255591	0.134185	0.29393	0.246006	0.118211	0.0766773	0.118211	0.242812	0.121406	0.086262	0.0798722	0	0.466454	0.591054	0.335463	0.303514	0.501597	0.482428	0.313099	0.338658	0.482428	0.405751	0.501597	0.485623	0.341853	0.485623	0.501597	0.348243
B*08:01	0.300319	0.255591	0.271565	0.300319	0.316294	0.341853	0.335463	0.364217	0.421725	0.373802	0.338658	0.290735	0.348243	0.351438	0.306709	0.332268	0.306709	0.520767	0.29393	0.434505	0.440895	0.325879	0.43131	0.28115	0.290735	0.447284	0.450479	0.479233	0.27476	0.482428	0.450479	0.453674	0.466454	0	0.194888	0.255591	0.223642	0.105431	0.086262	0.252396	0.246006	0.086262	0.124601	0.105431	0.0894569	0.249201	0.0894569	0.118211	0.255591
B*08:02	0.42492	0.380192	0.396166	0.42492	0.440895	0.466454	0.460064	0.488818	0.546326	0.498403	0.463259	0.415335	0.472843	0.476038	0.43131	0.456869	0.43131	0.645367	0.41853	0.316294	0.565495	0.450479	0.555911	0.405751	0.415335	0.571885	0.57508	0.603834	0.399361	0.607029	0.57508	0.578275	0.591054	0.194888	0	0.380192	0.348243	0.230032	0.210863	0.376997	0.370607	0.210863	0.249201	0.230032	0.188498	0.341853	0.214058	0.242812	0.380192
B*08:04	0.472843	0.428115	0.444089	0.456869	0.488818	0.514377	0.463259	0.536741	0.594249	0.546326	0.511182	0.463259	0.520767	0.523962	0.479233	0.504792	0.479233	0.389776	0.466454	0.607029	0.309904	0.498403	0.300319	0.453674	0.463259	0.316294	0.319489	0.348243	0.447284	0.351438	0.319489	0.322684	0.335463	0.255591	0.380192	0	0.105431	0.290735	0.271565	0.134185	0.127796	0.271565	0.309904	0.290735	0.27476	0.13099	0.27476	0.303514	0.13738
B*08:07	0.440895	0.396166	0.412141	0.4377	0.456869	0.482428	0.476038	0.504792	0.5623	0.514377	0.479233	0.43131	0.488818	0.492013	0.447284	0.472843	0.447284	0.357827	0.434505	0.57508	0.290735	0.466454	0.268371	0.421725	0.43131	0.297125	0.28754	0.329073	0.415335	0.332268	0.28754	0.290735	0.303514	0.223642	0.348243	0.105431	0	0.258786	0.239617	0.102236	0.0958466	0.239617	0.277955	0.258786	0.242812	0.0990415	0.242812	0.258786	0.105431
B*08:09	0.335463	0.290735	0.306709	0.335463	0.351438	0.376997	0.370607	0.396166	0.456869	0.405751	0.373802	0.325879	0.380192	0.386581	0.341853	0.367412	0.341853	0.555911	0.329073	0.469649	0.476038	0.361022	0.466454	0.316294	0.325879	0.482428	0.485623	0.514377	0.309904	0.517572	0.485623	0.488818	0.501597	0.105431	0.230032	0.290735	0.258786	0	0.121406	0.28754	0.28115	0.121406	0.159744	0.140575	0.124601	0.284345	0.124601	0.153355	0.290735
B*08:12	0.316294	0.271565	0.28754	0.316294	0.290735	0.357827	0.351438	0.338658	0.4377	0.348243	0.354633	0.306709	0.322684	0.367412	0.322684	0.348243	0.322684	0.536741	0.309904	0.450479	0.456869	0.341853	0.447284	0.297125	0.306709	0.463259	0.466454	0.495208	0.290735	0.498403	0.466454	0.469649	0.482428	0.086262	0.210863	0.271565	0.239617	0.121406	0	0.268371	0.220447	0.102236	0.140575	0.121406	0.105431	0.265176	0.105431	0.134185	0.271565
B*08:13	0.450479	0.405751	0.453674	0.434505	0.466454	0.492013	0.485623	0.514377	0.571885	0.523962	0.488818	0.440895	0.498403	0.501597	0.456869	0.482428	0.415335	0.367412	0.444089	0.584665	0.28754	0.476038	0.236422	0.389776	0.440895	0.252396	0.297125	0.325879	0.42492	0.329073	0.297125	0.300319	0.313099	0.252396	0.376997	0.134185	0.102236	0.28754	0.268371	0	0.124601	0.268371	0.27476	0.28754	0.271565	0.127796	0.271565	0.300319	0.134185
B*08:16	0.476038	0.43131	0.447284	0.460064	0.450479	0.517572	0.511182	0.498403	0.57508	0.507987	0.492013	0.466454	0.482428	0.527157	0.482428	0.507987	0.482428	0.392971	0.469649	0.610224	0.313099	0.501597	0.303514	0.456869	0.466454	0.319489	0.322684	0.351438	0.450479	0.354633	0.322684	0.325879	0.338658	0.246006	0.370607	0.127796	0.0958466	0.28115	0.220447	0.124601	0	0.261981	0.300319	0.28115	0.265176	0.121406	0.265176	0.29393	0.127796
B*08:18	0.316294	0.271565	0.28754	0.316294	0.332268	0.357827	0.351438	0.380192	0.4377	0.389776	0.354633	0.306709	0.364217	0.367412	0.322684	0.348243	0.322684	0.536741	0.309904	0.450479	0.456869	0.341853	0.447284	0.297125	0.306709	0.463259	0.466454	0.495208	0.290735	0.498403	0.466454	0.469649	0.482428	0.086262	0.210863	0.271565	0.239617	0.121406	0.102236	0.268371	0.261981	0	0.140575	0.121406	0.105431	0.265176	0.105431	0.134185	0.271565
B*08:20	0.239617	0.194888	0.27476	0.239617	0.255591	0.28115	0.27476	0.303514	0.361022	0.313099	0.277955	0.230032	0.28754	0.290735	0.246006	0.271565	0.277955	0.460064	0.233227	0.373802	0.380192	0.265176	0.402556	0.303514	0.255591	0.41853	0.389776	0.41853	0.214058	0.421725	0.389776	0.392971	0.405751	0.124601	0.249201	0.309904	0.277955	0.159744	0.140575	0.27476	0.300319	0.140575	0	0.159744	0.14377	0.303514	0.14377	0.172524	0.309904
B*08:23	0.335463	0.290735	0.306709	0.335463	0.351438	0.376997	0.370607	0.399361	0.456869	0.408946	0.373802	0.242812	0.383387	0.386581	0.341853	0.367412	0.341853	0.555911	0.329073	0.469649	0.476038	0.361022	0.466454	0.316294	0.325879	0.482428	0.485623	0.514377	0.309904	0.517572	0.485623	0.488818	0.501597	0.105431	0.230032	0.290735	0.258786	0.140575	0.121406	0.28754	0.28115	0.121406	0.159744	0	0.124601	0.284345	0.124601	0.153355	0.290735
B*08:29	0.319489	0.27476	0.290735	0.319489	0.335463	0.361022	0.354633	0.383387	0.440895	0.392971	0.357827	0.309904	0.367412	0.370607	0.325879	0.351438	0.325879	0.539936	0.313099	0.428115	0.460064	0.345048	0.450479	0.300319	0.309904	0.466454	0.469649	0.498403	0.29393	0.501597	0.469649	0.472843	0.485623	0.0894569	0.188498	0.27476	0.242812	0.124601	0.105431	0.271565	0.265176	0.105431	0.14377	0.124601	0	0.268371	0.108626	0.13738	0.27476
B*08:34	0.479233	0.434505	0.450479	0.463259	0.495208	0.520767	0.514377	0.543131	0.600639	0.552716	0.517572	0.469649	0.527157	0.530351	0.485623	0.511182	0.485623	0.396166	0.472843	0.58147	0.316294	0.504792	0.306709	0.460064	0.469649	0.322684	0.325879	0.354633	0.453674	0.357827	0.325879	0.329073	0.341853	0.249201	0.341853	0.13099	0.0990415	0.284345	0.265176	0.127796	0.121406	0.265176	0.303514	0.284345	0.268371	0	0.268371	0.297125	0.13099
B*08:36	0.319489	0.27476	0.290735	0.319489	0.335463	0.361022	0.354633	0.383387	0.440895	0.392971	0.357827	0.309904	0.367412	0.370607	0.325879	0.351438	0.325879	0.539936	0.313099	0.453674	0.460064	0.345048	0.450479	0.300319	0.309904	0.466454	0.469649	0.498403	0.29393	0.501597	0.469649	0.472843	0.485623	0.0894569	0.214058	0.27476	0.242812	0.124601	0.105431	0.271565	0.265176	0.105431	0.14377	0.124601	0.108626	0.268371	0	0.13738	0.27476
B*08:37	0.335463	0.290735	0.306709	0.348243	0.351438	0.309904	0.370607	0.399361	0.456869	0.408946	0.373802	0.325879	0.383387	0.386581	0.341853	0.367412	0.341853	0.498403	0.329073	0.469649	0.488818	0.361022	0.466454	0.316294	0.325879	0.495208	0.485623	0.527157	0.309904	0.514377	0.485623	0.488818	0.501597	0.118211	0.242812	0.303514	0.258786	0.153355	0.134185	0.300319	0.29393	0.134185	0.172524	0.153355	0.13738	0.297125	0.13738	0	0.303514
B*08:68	0.485623	0.440895	0.456869	0.469649	0.501597	0.527157	0.520767	0.549521	0.607029	0.559105	0.523962	0.476038	0.533546	0.536741	0.492013	0.517572	0.492013	0.402556	0.479233	0.619808	0.322684	0.511182	0.313099	0.466454	0.476038	0.329073	0.332268	0.361022	0.460064	0.364217	0.332268	0.335463	0.348243	0.255591	0.380192	0.13738	0.105431	0.290735	0.271565	0.134185	0.127796	0.271565	0.309904	0.290735	0.27476	0.13099	0.27476	0.303514	0
B*13:01	0.805112	0.760383	0.808307	0.805112	0.779553	0.808307	0.795527	0.72524	0.881789	0.769968	0.84345	0.71246	0.744409	0.884984	0.811502	0.837061	0.769968	0.769968	0.769968	0.696486	0.728435	0.830671	0.722045	0.744409	0.795527	0.693291	0.731629	0.766773	0.779553	0.744409	0.738019	0.741214	0.753994	0.747604	0.623003	0.651757	0.683706	0.779553	0.722045	0.638978	0.664537	0.763578	0.769968	0.699681	0.741214	0.677316	0.766773	0.757188	0.715655
B*13:02	0.792332	0.747604	0.795527	0.792332	0.808307	0.795527	0.782748	0.817891	0.86901	0.86262	0.830671	0.699681	0.837061	0.872204	0.798722	0.824281	0.757188	0.757188	0.757188	0.683706	0.715655	0.817891	0.709265	0.731629	0.782748	0.680511	0.71885	0.753994	0.766773	0.731629	0.72524	0.728435	0.741214	0.734824	0.610224	0.638978	0.670927	0.677316	0.750799	0.626198	0.693291	0.750799	0.757188	0.686901	0.728435	0.664537	0.753994	0.744409	0.702875
B*13:03	0.785942	0.741214	0.789137	0.785942	0.801917	0.789137	0.776358	0.811502	0.86262	0.85623	0.824281	0.693291	0.830671	0.798722	0.792332	0.817891	0.750799	0.750799	0.750799	0.677316	0.709265	0.811502	0.674121	0.72524	0.776358	0.674121	0.71246	0.747604	0.760383	0.72524	0.71885	0.722045	0.734824	0.699681	0.57508	0.603834	0.635783	0.642173	0.715655	0.591054	0.658147	0.715655	0.722045	0.651757	0.693291	0.629393	0.71885	0.709265	0.667732
B*13:06	0.840256	0.795527	0.84345	0.824281	0.814696	0.84345	0.830671	0.760383	0.916933	0.805112	0.878594	0.747604	0.779553	0.891374	0.846645	0.872204	0.805112	0.71885	0.805112	0.731629	0.677316	0.865815	0.626198	0.779553	0.830671	0.642173	0.680511	0.715655	0.814696	0.693291	0.686901	0.690096	0.702875	0.738019	0.613419	0.555911	0.587859	0.769968	0.71246	0.543131	0.56869	0.753994	0.760383	0.690096	0.731629	0.58147	0.757188	0.747604	0.619808
B*13:12	0.824281	0.779553	0.827476	0.824281	0.798722	0.827476	0.814696	0.744409	0.900958	0.789137	0.86262	0.731629	0.763578	0.888179	0.830671	0.85623	0.789137	0.789137	0.789137	0.715655	0.747604	0.84984	0.722045	0.763578	0.814696	0.71246	0.750799	0.785942	0.798722	0.763578	0.757188	0.760383	0.773163	0.747604	0.623003	0.651757	0.683706	0.779553	0.722045	0.638978	0.664537	0.763578	0.769968	0.699681	0.741214	0.677316	0.766773	0.757188	0.715655
B*13:20	0.792332	0.747604	0.795527	0.776358	0.766773	0.795527	0.782748	0.71246	0.86901	0.757188	0.830671	0.699681	0.731629	0.872204	0.798722	0.824281	0.757188	0.670927	0.757188	0.683706	0.629393	0.817891	0.623003	0.782748	0.808307	0.594249	0.632588	0.667732	0.766773	0.645367	0.638978	0.642173	0.654952	0.785942	0.661342	0.603834	0.635783	0.817891	0.760383	0.591054	0.616613	0.801917	0.757188	0.738019	0.779553	0.629393	0.805112	0.795527	0.667732
B*13:21	0.738019	0.693291	0.741214	0.722045	0.71246	0.779553	0.728435	0.693291	0.814696	0.702875	0.776358	0.645367	0.677316	0.817891	0.744409	0.769968	0.702875	0.654952	0.702875	0.629393	0.57508	0.763578	0.56869	0.677316	0.728435	0.539936	0.578275	0.613419	0.71246	0.616613	0.584665	0.587859	0.600639	0.680511	0.555911	0.498403	0.530351	0.71246	0.654952	0.485623	0.511182	0.696486	0.702875	0.632588	0.674121	0.523962	0.699681	0.728435	0.5623
B*13:29	0.837061	0.792332	0.840256	0.821086	0.811502	0.840256	0.827476	0.757188	0.913738	0.801917	0.875399	0.744409	0.776358	0.916933	0.84345	0.86901	0.801917	0.715655	0.801917	0.728435	0.674121	0.86262	0.667732	0.776358	0.827476	0.638978	0.677316	0.71246	0.811502	0.690096	0.683706	0.686901	0.699681	0.779553	0.654952	0.597444	0.629393	0.811502	0.753994	0.584665	0.610224	0.795527	0.801917	0.731629	0.773163	0.623003	0.798722	0.789137	0.661342
B*13:43	0.840256	0.795527	0.84345	0.824281	0.814696	0.84345	0.830671	0.760383	0.916933	0.805112	0.878594	0.747604	0.779553	0.920128	0.846645	0.872204	0.805112	0.71885	0.805112	0.731629	0.677316	0.865815	0.670927	0.779553	0.830671	0.642173	0.680511	0.715655	0.814696	0.693291	0.686901	0.690096	0.702875	0.782748	0.658147	0.600639	0.632588	0.814696	0.757188	0.587859	0.613419	0.798722	0.805112	0.734824	0.776358	0.626198	0.801917	0.792332	0.664537
B*14:01	0.389776	0.345048	0.392971	0.389776	0.376997	0.415335	0.357827	0.42492	0.511182	0.376997	0.428115	0.380192	0.408946	0.440895	0.396166	0.421725	0.354633	0.495208	0.354633	0.523962	0.482428	0.415335	0.43131	0.380192	0.405751	0.447284	0.485623	0.520767	0.402556	0.4377	0.492013	0.495208	0.507987	0.415335	0.539936	0.495208	0.520767	0.456869	0.402556	0.476038	0.514377	0.43131	0.386581	0.450479	0.434505	0.546326	0.434505	0.447284	0.552716
B*14:02	0.399361	0.354633	0.402556	0.399361	0.386581	0.42492	0.367412	0.434505	0.520767	0.386581	0.4377	0.389776	0.41853	0.450479	0.405751	0.43131	0.364217	0.504792	0.364217	0.533546	0.492013	0.42492	0.440895	0.389776	0.415335	0.456869	0.495208	0.530351	0.412141	0.447284	0.501597	0.504792	0.517572	0.405751	0.530351	0.485623	0.511182	0.447284	0.392971	0.466454	0.504792	0.421725	0.376997	0.440895	0.42492	0.536741	0.42492	0.4377	0.543131
B*14:03	0.361022	0.316294	0.396166	0.361022	0.348243	0.386581	0.329073	0.396166	0.482428	0.348243	0.399361	0.351438	0.380192	0.412141	0.367412	0.392971	0.399361	0.466454	0.325879	0.495208	0.453674	0.386581	0.476038	0.42492	0.376997	0.492013	0.456869	0.492013	0.373802	0.408946	0.463259	0.466454	0.479233	0.399361	0.523962	0.479233	0.504792	0.440895	0.386581	0.501597	0.498403	0.415335	0.338658	0.434505	0.41853	0.530351	0.41853	0.43131	0.536741
B*14:05	0.376997	0.332268	0.380192	0.376997	0.392971	0.402556	0.345048	0.440895	0.498403	0.392971	0.415335	0.367412	0.42492	0.428115	0.383387	0.408946	0.341853	0.482428	0.341853	0.511182	0.469649	0.402556	0.41853	0.367412	0.392971	0.434505	0.472843	0.507987	0.389776	0.42492	0.479233	0.482428	0.495208	0.383387	0.507987	0.463259	0.488818	0.41853	0.399361	0.444089	0.511182	0.399361	0.354633	0.41853	0.402556	0.514377	0.402556	0.415335	0.520767
B*14:06	0.392971	0.348243	0.396166	0.392971	0.367412	0.41853	0.361022	0.415335	0.514377	0.367412	0.43131	0.383387	0.399361	0.444089	0.399361	0.42492	0.357827	0.498403	0.357827	0.527157	0.485623	0.41853	0.434505	0.383387	0.408946	0.450479	0.488818	0.523962	0.405751	0.440895	0.495208	0.498403	0.511182	0.399361	0.523962	0.479233	0.504792	0.434505	0.373802	0.460064	0.485623	0.415335	0.370607	0.434505	0.41853	0.530351	0.41853	0.43131	0.536741
B*14:09	0.523962	0.479233	0.527157	0.507987	0.511182	0.549521	0.492013	0.559105	0.645367	0.511182	0.5623	0.514377	0.543131	0.57508	0.530351	0.555911	0.488818	0.373802	0.488818	0.658147	0.361022	0.549521	0.309904	0.514377	0.539936	0.325879	0.364217	0.399361	0.536741	0.316294	0.370607	0.373802	0.386581	0.530351	0.654952	0.354633	0.380192	0.571885	0.517572	0.335463	0.373802	0.546326	0.501597	0.565495	0.549521	0.405751	0.549521	0.5623	0.412141
B*14:11	0.527157	0.482428	0.530351	0.511182	0.514377	0.552716	0.495208	0.5623	0.648562	0.514377	0.565495	0.517572	0.546326	0.578275	0.533546	0.559105	0.492013	0.376997	0.492013	0.661342	0.364217	0.552716	0.313099	0.517572	0.543131	0.329073	0.367412	0.402556	0.501597	0.319489	0.373802	0.376997	0.389776	0.495208	0.619808	0.319489	0.345048	0.536741	0.482428	0.300319	0.338658	0.511182	0.466454	0.530351	0.514377	0.370607	0.514377	0.527157	0.376997
B*14:12	0.536741	0.492013	0.539936	0.536741	0.523962	0.5623	0.504792	0.571885	0.658147	0.523962	0.57508	0.527157	0.555911	0.587859	0.543131	0.56869	0.501597	0.402556	0.501597	0.670927	0.389776	0.5623	0.338658	0.527157	0.552716	0.354633	0.392971	0.428115	0.549521	0.345048	0.399361	0.402556	0.415335	0.5623	0.686901	0.402556	0.428115	0.603834	0.549521	0.383387	0.421725	0.578275	0.533546	0.597444	0.58147	0.453674	0.58147	0.594249	0.460064
B*15:01	0.5623	0.517572	0.594249	0.559105	0.536741	0.536741	0.552716	0.584665	0.638978	0.594249	0.600639	0.469649	0.56869	0.57508	0.56869	0.594249	0.57508	0.492013	0.527157	0.696486	0.482428	0.587859	0.482428	0.600639	0.578275	0.495208	0.472843	0.520767	0.536741	0.507987	0.479233	0.482428	0.495208	0.56869	0.693291	0.456869	0.476038	0.603834	0.543131	0.463259	0.469649	0.584665	0.511182	0.520767	0.587859	0.514377	0.587859	0.536741	0.520767
B*15:02	0.626198	0.58147	0.629393	0.623003	0.600639	0.600639	0.616613	0.58147	0.728435	0.533546	0.664537	0.533546	0.565495	0.638978	0.632588	0.658147	0.591054	0.498403	0.591054	0.760383	0.546326	0.651757	0.498403	0.616613	0.642173	0.511182	0.536741	0.584665	0.600639	0.514377	0.543131	0.546326	0.559105	0.603834	0.728435	0.492013	0.511182	0.635783	0.578275	0.479233	0.504792	0.619808	0.57508	0.555911	0.623003	0.549521	0.623003	0.571885	0.555911
B*15:03	0.527157	0.482428	0.530351	0.523962	0.501597	0.501597	0.517572	0.549521	0.623003	0.559105	0.565495	0.434505	0.533546	0.539936	0.533546	0.559105	0.492013	0.456869	0.492013	0.661342	0.447284	0.552716	0.399361	0.517572	0.543131	0.412141	0.4377	0.485623	0.501597	0.472843	0.444089	0.447284	0.460064	0.504792	0.629393	0.392971	0.412141	0.539936	0.479233	0.380192	0.405751	0.520767	0.476038	0.456869	0.523962	0.450479	0.523962	0.472843	0.456869
B*15:04	0.58147	0.536741	0.613419	0.578275	0.597444	0.555911	0.571885	0.642173	0.658147	0.651757	0.619808	0.488818	0.626198	0.594249	0.587859	0.613419	0.594249	0.511182	0.546326	0.715655	0.501597	0.607029	0.501597	0.619808	0.597444	0.514377	0.492013	0.539936	0.555911	0.527157	0.498403	0.501597	0.514377	0.587859	0.71246	0.476038	0.495208	0.530351	0.603834	0.482428	0.530351	0.603834	0.530351	0.539936	0.607029	0.533546	0.607029	0.555911	0.539936
B*15:05	0.607029	0.5623	0.610224	0.603834	0.58147	0.58147	0.597444	0.629393	0.683706	0.638978	0.645367	0.514377	0.613419	0.619808	0.613419	0.638978	0.571885	0.536741	0.571885	0.741214	0.527157	0.632588	0.479233	0.546326	0.597444	0.492013	0.517572	0.565495	0.58147	0.552716	0.523962	0.527157	0.539936	0.533546	0.658147	0.421725	0.440895	0.56869	0.507987	0.408946	0.434505	0.549521	0.555911	0.485623	0.552716	0.479233	0.552716	0.501597	0.485623
B*15:06	0.623003	0.578275	0.626198	0.619808	0.597444	0.597444	0.613419	0.645367	0.699681	0.597444	0.661342	0.530351	0.629393	0.635783	0.629393	0.654952	0.587859	0.495208	0.587859	0.757188	0.543131	0.648562	0.495208	0.613419	0.638978	0.507987	0.533546	0.58147	0.597444	0.511182	0.539936	0.543131	0.555911	0.600639	0.72524	0.488818	0.507987	0.635783	0.57508	0.476038	0.501597	0.616613	0.571885	0.552716	0.619808	0.546326	0.619808	0.56869	0.552716
B*15:07	0.546326	0.501597	0.578275	0.543131	0.5623	0.520767	0.536741	0.610224	0.623003	0.619808	0.584665	0.453674	0.594249	0.559105	0.552716	0.578275	0.559105	0.476038	0.511182	0.680511	0.466454	0.571885	0.466454	0.584665	0.5623	0.479233	0.456869	0.504792	0.520767	0.492013	0.463259	0.466454	0.479233	0.552716	0.677316	0.440895	0.460064	0.587859	0.56869	0.447284	0.495208	0.56869	0.495208	0.504792	0.571885	0.498403	0.571885	0.520767	0.504792
B*15:08	0.523962	0.479233	0.555911	0.520767	0.498403	0.498403	0.559105	0.546326	0.626198	0.555911	0.5623	0.43131	0.530351	0.536741	0.530351	0.555911	0.536741	0.453674	0.488818	0.658147	0.444089	0.549521	0.444089	0.5623	0.539936	0.456869	0.434505	0.482428	0.498403	0.469649	0.440895	0.444089	0.456869	0.517572	0.642173	0.469649	0.42492	0.552716	0.492013	0.412141	0.41853	0.533546	0.460064	0.469649	0.536741	0.463259	0.536741	0.485623	0.469649
B*15:09	0.469649	0.42492	0.472843	0.453674	0.444089	0.511182	0.4377	0.492013	0.591054	0.501597	0.507987	0.376997	0.476038	0.482428	0.476038	0.501597	0.434505	0.456869	0.434505	0.603834	0.376997	0.495208	0.341853	0.460064	0.485623	0.341853	0.380192	0.415335	0.444089	0.41853	0.386581	0.389776	0.402556	0.453674	0.578275	0.348243	0.373802	0.488818	0.428115	0.329073	0.354633	0.469649	0.42492	0.405751	0.472843	0.399361	0.472843	0.501597	0.405751
B*15:10	0.463259	0.41853	0.466454	0.460064	0.4377	0.504792	0.43131	0.485623	0.584665	0.495208	0.501597	0.370607	0.469649	0.476038	0.469649	0.495208	0.428115	0.450479	0.428115	0.597444	0.383387	0.488818	0.335463	0.453674	0.479233	0.348243	0.373802	0.421725	0.4377	0.42492	0.380192	0.383387	0.396166	0.460064	0.584665	0.354633	0.367412	0.495208	0.434505	0.335463	0.361022	0.476038	0.43131	0.412141	0.479233	0.405751	0.479233	0.495208	0.412141
B*15:11	0.507987	0.463259	0.539936	0.504792	0.482428	0.482428	0.539936	0.530351	0.610224	0.539936	0.546326	0.415335	0.514377	0.520767	0.514377	0.539936	0.520767	0.4377	0.472843	0.642173	0.428115	0.533546	0.428115	0.546326	0.523962	0.440895	0.41853	0.466454	0.482428	0.453674	0.42492	0.428115	0.440895	0.530351	0.654952	0.469649	0.4377	0.565495	0.504792	0.42492	0.43131	0.546326	0.472843	0.482428	0.549521	0.476038	0.549521	0.498403	0.482428
B*15:12	0.632588	0.587859	0.664537	0.629393	0.607029	0.607029	0.623003	0.654952	0.709265	0.664537	0.670927	0.539936	0.638978	0.56869	0.638978	0.664537	0.645367	0.5623	0.597444	0.766773	0.552716	0.658147	0.552716	0.670927	0.648562	0.565495	0.543131	0.591054	0.607029	0.578275	0.549521	0.552716	0.565495	0.638978	0.763578	0.527157	0.546326	0.674121	0.613419	0.533546	0.539936	0.654952	0.58147	0.591054	0.658147	0.584665	0.658147	0.607029	0.591054
B*15:13	0.760383	0.715655	0.763578	0.757188	0.734824	0.734824	0.750799	0.715655	0.86262	0.667732	0.798722	0.667732	0.699681	0.773163	0.766773	0.792332	0.72524	0.632588	0.72524	0.623003	0.680511	0.785942	0.632588	0.750799	0.776358	0.645367	0.670927	0.71885	0.734824	0.648562	0.677316	0.680511	0.693291	0.738019	0.619808	0.626198	0.645367	0.769968	0.71246	0.613419	0.638978	0.753994	0.709265	0.690096	0.731629	0.651757	0.757188	0.70607	0.690096
B*15:14	0.610224	0.565495	0.642173	0.607029	0.584665	0.584665	0.600639	0.632588	0.686901	0.642173	0.648562	0.517572	0.616613	0.552716	0.616613	0.642173	0.623003	0.539936	0.57508	0.744409	0.530351	0.635783	0.530351	0.648562	0.626198	0.543131	0.520767	0.56869	0.584665	0.555911	0.527157	0.530351	0.543131	0.616613	0.741214	0.504792	0.523962	0.651757	0.591054	0.511182	0.517572	0.632588	0.559105	0.56869	0.635783	0.5623	0.635783	0.584665	0.56869
B*15:15	0.549521	0.504792	0.58147	0.546326	0.523962	0.523962	0.539936	0.571885	0.651757	0.58147	0.587859	0.456869	0.555911	0.5623	0.555911	0.58147	0.5623	0.479233	0.514377	0.683706	0.469649	0.57508	0.469649	0.587859	0.565495	0.482428	0.460064	0.507987	0.523962	0.495208	0.466454	0.469649	0.482428	0.555911	0.680511	0.444089	0.463259	0.591054	0.530351	0.450479	0.456869	0.571885	0.498403	0.507987	0.57508	0.501597	0.57508	0.523962	0.507987
B*15:16	0.817891	0.827476	0.821086	0.814696	0.792332	0.792332	0.824281	0.801917	0.86262	0.846645	0.85623	0.779553	0.821086	0.830671	0.824281	0.84984	0.782748	0.747604	0.782748	0.680511	0.738019	0.84345	0.690096	0.808307	0.833866	0.702875	0.728435	0.776358	0.792332	0.763578	0.744409	0.738019	0.750799	0.837061	0.71885	0.757188	0.744409	0.795527	0.811502	0.71246	0.738019	0.853035	0.808307	0.789137	0.830671	0.750799	0.85623	0.805112	0.789137
B*15:17	0.798722	0.808307	0.801917	0.779553	0.773163	0.782748	0.805112	0.821086	0.84345	0.773163	0.837061	0.760383	0.805112	0.811502	0.805112	0.830671	0.763578	0.645367	0.763578	0.661342	0.702875	0.824281	0.670927	0.789137	0.814696	0.667732	0.709265	0.741214	0.773163	0.677316	0.72524	0.71885	0.731629	0.801917	0.683706	0.722045	0.72524	0.837061	0.776358	0.677316	0.702875	0.817891	0.773163	0.753994	0.795527	0.715655	0.821086	0.795527	0.753994
B*15:18	0.504792	0.460064	0.507987	0.501597	0.479233	0.479233	0.472843	0.527157	0.626198	0.536741	0.543131	0.412141	0.511182	0.517572	0.511182	0.536741	0.469649	0.434505	0.469649	0.638978	0.42492	0.530351	0.376997	0.495208	0.520767	0.389776	0.415335	0.463259	0.479233	0.450479	0.421725	0.42492	0.4377	0.501597	0.626198	0.396166	0.408946	0.536741	0.476038	0.376997	0.402556	0.517572	0.472843	0.453674	0.520767	0.447284	0.520767	0.469649	0.453674
B*15:20	0.664537	0.619808	0.667732	0.661342	0.638978	0.638978	0.654952	0.584665	0.741214	0.629393	0.702875	0.571885	0.603834	0.677316	0.670927	0.696486	0.629393	0.594249	0.629393	0.798722	0.584665	0.690096	0.536741	0.603834	0.654952	0.549521	0.57508	0.623003	0.638978	0.610224	0.58147	0.584665	0.597444	0.591054	0.715655	0.479233	0.498403	0.623003	0.565495	0.466454	0.492013	0.607029	0.613419	0.543131	0.610224	0.536741	0.610224	0.559105	0.543131
B*15:21	0.616613	0.571885	0.619808	0.613419	0.591054	0.591054	0.584665	0.571885	0.71885	0.523962	0.654952	0.523962	0.555911	0.629393	0.623003	0.648562	0.58147	0.488818	0.58147	0.750799	0.536741	0.642173	0.488818	0.607029	0.632588	0.501597	0.527157	0.57508	0.591054	0.504792	0.533546	0.536741	0.549521	0.613419	0.738019	0.507987	0.520767	0.645367	0.587859	0.488818	0.514377	0.629393	0.584665	0.565495	0.632588	0.559105	0.632588	0.58147	0.565495
B*15:23	0.638978	0.594249	0.642173	0.635783	0.613419	0.613419	0.607029	0.661342	0.760383	0.670927	0.677316	0.546326	0.645367	0.651757	0.645367	0.670927	0.603834	0.56869	0.603834	0.501597	0.559105	0.664537	0.511182	0.629393	0.654952	0.523962	0.549521	0.597444	0.613419	0.584665	0.555911	0.559105	0.571885	0.635783	0.517572	0.530351	0.543131	0.670927	0.610224	0.511182	0.536741	0.651757	0.607029	0.587859	0.629393	0.549521	0.654952	0.603834	0.587859
B*15:24	0.696486	0.651757	0.728435	0.693291	0.670927	0.670927	0.686901	0.71885	0.773163	0.728435	0.734824	0.603834	0.702875	0.709265	0.702875	0.728435	0.709265	0.626198	0.661342	0.559105	0.616613	0.722045	0.616613	0.734824	0.71246	0.629393	0.607029	0.654952	0.670927	0.642173	0.613419	0.616613	0.629393	0.702875	0.584665	0.591054	0.610224	0.738019	0.677316	0.597444	0.603834	0.71885	0.645367	0.654952	0.696486	0.616613	0.722045	0.670927	0.654952
B*15:25	0.638978	0.594249	0.642173	0.635783	0.613419	0.613419	0.629393	0.594249	0.715655	0.546326	0.677316	0.546326	0.578275	0.651757	0.645367	0.670927	0.603834	0.511182	0.603834	0.773163	0.559105	0.664537	0.511182	0.629393	0.654952	0.523962	0.549521	0.597444	0.613419	0.527157	0.555911	0.559105	0.571885	0.616613	0.741214	0.504792	0.523962	0.648562	0.591054	0.492013	0.517572	0.632588	0.587859	0.56869	0.635783	0.5623	0.635783	0.584665	0.56869
B*15:27	0.578275	0.533546	0.610224	0.57508	0.552716	0.552716	0.56869	0.600639	0.654952	0.610224	0.616613	0.485623	0.584665	0.591054	0.584665	0.610224	0.591054	0.507987	0.543131	0.71246	0.498403	0.603834	0.498403	0.616613	0.594249	0.511182	0.488818	0.536741	0.552716	0.523962	0.495208	0.498403	0.511182	0.584665	0.709265	0.472843	0.492013	0.619808	0.559105	0.479233	0.485623	0.600639	0.527157	0.536741	0.603834	0.530351	0.603834	0.552716	0.536741
B*15:28	0.578275	0.533546	0.610224	0.57508	0.552716	0.552716	0.56869	0.600639	0.654952	0.610224	0.616613	0.485623	0.584665	0.591054	0.584665	0.610224	0.591054	0.507987	0.543131	0.71246	0.498403	0.603834	0.498403	0.616613	0.594249	0.511182	0.488818	0.536741	0.552716	0.523962	0.495208	0.498403	0.511182	0.584665	0.709265	0.472843	0.492013	0.619808	0.559105	0.479233	0.485623	0.600639	0.527157	0.536741	0.603834	0.530351	0.603834	0.552716	0.536741
B*15:29	0.488818	0.444089	0.492013	0.485623	0.463259	0.463259	0.523962	0.511182	0.610224	0.520767	0.527157	0.396166	0.495208	0.501597	0.495208	0.520767	0.453674	0.41853	0.453674	0.623003	0.408946	0.514377	0.361022	0.479233	0.504792	0.373802	0.399361	0.447284	0.463259	0.434505	0.405751	0.408946	0.421725	0.453674	0.578275	0.405751	0.361022	0.488818	0.428115	0.329073	0.354633	0.469649	0.42492	0.405751	0.472843	0.399361	0.472843	0.421725	0.405751
B*15:30	0.527157	0.482428	0.559105	0.511182	0.501597	0.56869	0.517572	0.549521	0.603834	0.559105	0.565495	0.434505	0.533546	0.539936	0.533546	0.559105	0.539936	0.514377	0.492013	0.661342	0.434505	0.552716	0.447284	0.565495	0.543131	0.447284	0.4377	0.472843	0.501597	0.476038	0.444089	0.447284	0.460064	0.520767	0.645367	0.408946	0.440895	0.555911	0.495208	0.415335	0.421725	0.536741	0.463259	0.472843	0.539936	0.466454	0.539936	0.56869	0.472843
B*15:31	0.619808	0.57508	0.623003	0.616613	0.594249	0.594249	0.610224	0.642173	0.722045	0.594249	0.658147	0.527157	0.626198	0.632588	0.626198	0.651757	0.584665	0.492013	0.584665	0.753994	0.539936	0.645367	0.492013	0.559105	0.610224	0.504792	0.530351	0.578275	0.594249	0.507987	0.536741	0.539936	0.552716	0.546326	0.670927	0.434505	0.453674	0.58147	0.520767	0.421725	0.447284	0.5623	0.56869	0.498403	0.565495	0.492013	0.565495	0.514377	0.498403
B*15:32	0.603834	0.559105	0.635783	0.600639	0.578275	0.578275	0.594249	0.626198	0.680511	0.635783	0.642173	0.511182	0.610224	0.616613	0.610224	0.635783	0.616613	0.533546	0.56869	0.738019	0.523962	0.629393	0.523962	0.642173	0.619808	0.536741	0.514377	0.5623	0.578275	0.549521	0.520767	0.523962	0.536741	0.610224	0.734824	0.498403	0.517572	0.645367	0.584665	0.504792	0.511182	0.626198	0.552716	0.5623	0.629393	0.555911	0.629393	0.578275	0.5623
B*15:33	0.555911	0.511182	0.587859	0.552716	0.530351	0.530351	0.546326	0.578275	0.632588	0.587859	0.594249	0.463259	0.5623	0.56869	0.5623	0.587859	0.56869	0.485623	0.520767	0.690096	0.476038	0.58147	0.476038	0.594249	0.571885	0.488818	0.466454	0.514377	0.530351	0.501597	0.472843	0.476038	0.488818	0.5623	0.686901	0.450479	0.469649	0.597444	0.536741	0.456869	0.463259	0.578275	0.504792	0.514377	0.58147	0.507987	0.58147	0.530351	0.514377
B*15:34	0.578275	0.533546	0.610224	0.57508	0.552716	0.552716	0.56869	0.565495	0.654952	0.610224	0.616613	0.485623	0.584665	0.591054	0.584665	0.610224	0.591054	0.507987	0.543131	0.71246	0.498403	0.603834	0.498403	0.616613	0.594249	0.511182	0.488818	0.536741	0.552716	0.523962	0.495208	0.498403	0.511182	0.584665	0.709265	0.472843	0.492013	0.619808	0.559105	0.479233	0.485623	0.600639	0.527157	0.536741	0.603834	0.530351	0.603834	0.552716	0.536741
B*15:35	0.552716	0.507987	0.584665	0.549521	0.56869	0.527157	0.543131	0.616613	0.629393	0.626198	0.591054	0.460064	0.600639	0.565495	0.559105	0.584665	0.565495	0.482428	0.517572	0.686901	0.472843	0.578275	0.472843	0.591054	0.56869	0.485623	0.463259	0.511182	0.527157	0.498403	0.469649	0.472843	0.485623	0.559105	0.683706	0.447284	0.466454	0.578275	0.57508	0.453674	0.501597	0.57508	0.501597	0.511182	0.578275	0.504792	0.578275	0.527157	0.511182
B*15:37	0.495208	0.450479	0.498403	0.492013	0.469649	0.536741	0.463259	0.517572	0.616613	0.527157	0.533546	0.402556	0.501597	0.507987	0.501597	0.527157	0.460064	0.482428	0.460064	0.629393	0.415335	0.520767	0.367412	0.485623	0.511182	0.380192	0.405751	0.453674	0.469649	0.456869	0.412141	0.415335	0.428115	0.492013	0.616613	0.386581	0.399361	0.527157	0.466454	0.367412	0.392971	0.507987	0.463259	0.444089	0.511182	0.4377	0.511182	0.527157	0.444089
B*15:38	0.594249	0.549521	0.626198	0.591054	0.56869	0.56869	0.584665	0.616613	0.670927	0.626198	0.632588	0.501597	0.600639	0.607029	0.600639	0.626198	0.607029	0.523962	0.559105	0.728435	0.514377	0.619808	0.514377	0.632588	0.610224	0.527157	0.504792	0.552716	0.56869	0.539936	0.511182	0.514377	0.527157	0.600639	0.72524	0.488818	0.507987	0.635783	0.57508	0.495208	0.501597	0.616613	0.543131	0.552716	0.619808	0.546326	0.619808	0.56869	0.552716
B*15:39	0.58147	0.536741	0.584665	0.578275	0.555911	0.555911	0.571885	0.603834	0.658147	0.613419	0.619808	0.488818	0.587859	0.594249	0.587859	0.613419	0.546326	0.511182	0.546326	0.715655	0.501597	0.607029	0.453674	0.571885	0.597444	0.466454	0.492013	0.539936	0.555911	0.527157	0.498403	0.501597	0.514377	0.559105	0.683706	0.447284	0.466454	0.594249	0.533546	0.434505	0.460064	0.57508	0.530351	0.511182	0.578275	0.504792	0.578275	0.527157	0.511182
B*15:40	0.549521	0.504792	0.552716	0.546326	0.523962	0.523962	0.539936	0.571885	0.626198	0.58147	0.587859	0.456869	0.555911	0.629393	0.555911	0.58147	0.514377	0.479233	0.514377	0.683706	0.469649	0.57508	0.450479	0.539936	0.565495	0.434505	0.460064	0.507987	0.523962	0.495208	0.466454	0.469649	0.482428	0.555911	0.680511	0.444089	0.463259	0.591054	0.530351	0.43131	0.456869	0.571885	0.527157	0.507987	0.57508	0.501597	0.57508	0.523962	0.507987
B*15:44	0.607029	0.5623	0.610224	0.603834	0.58147	0.58147	0.57508	0.5623	0.709265	0.514377	0.645367	0.514377	0.546326	0.658147	0.613419	0.638978	0.571885	0.479233	0.571885	0.741214	0.527157	0.632588	0.463259	0.597444	0.623003	0.492013	0.517572	0.565495	0.58147	0.495208	0.523962	0.527157	0.539936	0.587859	0.71246	0.482428	0.495208	0.619808	0.5623	0.463259	0.488818	0.603834	0.559105	0.539936	0.607029	0.533546	0.607029	0.555911	0.539936
B*15:45	0.504792	0.460064	0.536741	0.501597	0.520767	0.546326	0.495208	0.56869	0.58147	0.578275	0.543131	0.412141	0.552716	0.517572	0.511182	0.536741	0.517572	0.492013	0.469649	0.638978	0.42492	0.530351	0.42492	0.543131	0.520767	0.4377	0.415335	0.463259	0.479233	0.466454	0.421725	0.42492	0.4377	0.511182	0.635783	0.399361	0.41853	0.546326	0.527157	0.405751	0.453674	0.527157	0.453674	0.463259	0.530351	0.456869	0.530351	0.546326	0.463259
B*15:46	0.546326	0.501597	0.578275	0.543131	0.520767	0.520767	0.536741	0.56869	0.629393	0.578275	0.584665	0.453674	0.552716	0.559105	0.552716	0.578275	0.559105	0.476038	0.511182	0.680511	0.466454	0.571885	0.466454	0.584665	0.5623	0.479233	0.456869	0.504792	0.520767	0.492013	0.463259	0.466454	0.479233	0.552716	0.677316	0.440895	0.460064	0.587859	0.527157	0.447284	0.453674	0.56869	0.495208	0.504792	0.571885	0.498403	0.571885	0.520767	0.504792
B*15:47	0.456869	0.412141	0.492013	0.453674	0.43131	0.43131	0.447284	0.479233	0.552716	0.488818	0.495208	0.364217	0.463259	0.536741	0.463259	0.488818	0.495208	0.386581	0.421725	0.591054	0.376997	0.482428	0.43131	0.520767	0.472843	0.415335	0.367412	0.415335	0.43131	0.402556	0.373802	0.376997	0.389776	0.495208	0.619808	0.383387	0.402556	0.530351	0.469649	0.412141	0.396166	0.511182	0.434505	0.447284	0.514377	0.440895	0.514377	0.463259	0.447284
B*15:48	0.58147	0.536741	0.584665	0.565495	0.555911	0.623003	0.571885	0.603834	0.658147	0.613419	0.619808	0.488818	0.587859	0.594249	0.587859	0.613419	0.546326	0.56869	0.546326	0.715655	0.488818	0.607029	0.453674	0.520767	0.571885	0.453674	0.492013	0.527157	0.555911	0.530351	0.498403	0.501597	0.514377	0.495208	0.619808	0.383387	0.415335	0.530351	0.469649	0.370607	0.396166	0.511182	0.517572	0.447284	0.514377	0.440895	0.514377	0.543131	0.447284
B*15:49	0.495208	0.450479	0.530351	0.492013	0.469649	0.469649	0.485623	0.517572	0.591054	0.527157	0.533546	0.402556	0.501597	0.57508	0.501597	0.527157	0.533546	0.354633	0.460064	0.629393	0.345048	0.520767	0.399361	0.559105	0.511182	0.383387	0.335463	0.383387	0.469649	0.370607	0.341853	0.345048	0.357827	0.533546	0.658147	0.351438	0.370607	0.56869	0.507987	0.380192	0.364217	0.549521	0.472843	0.485623	0.552716	0.408946	0.552716	0.501597	0.415335
B*15:52	0.498403	0.453674	0.501597	0.495208	0.472843	0.472843	0.466454	0.520767	0.619808	0.530351	0.536741	0.405751	0.504792	0.578275	0.504792	0.530351	0.463259	0.428115	0.463259	0.632588	0.41853	0.523962	0.399361	0.4377	0.488818	0.383387	0.408946	0.456869	0.472843	0.444089	0.415335	0.41853	0.43131	0.472843	0.597444	0.367412	0.380192	0.507987	0.447284	0.348243	0.373802	0.488818	0.495208	0.42492	0.492013	0.41853	0.492013	0.440895	0.42492
B*15:53	0.56869	0.523962	0.600639	0.565495	0.543131	0.543131	0.559105	0.591054	0.651757	0.600639	0.607029	0.476038	0.57508	0.58147	0.57508	0.600639	0.58147	0.498403	0.533546	0.702875	0.488818	0.594249	0.488818	0.607029	0.584665	0.501597	0.479233	0.527157	0.543131	0.514377	0.485623	0.488818	0.501597	0.57508	0.699681	0.463259	0.482428	0.610224	0.549521	0.469649	0.476038	0.591054	0.517572	0.527157	0.594249	0.520767	0.594249	0.543131	0.527157
B*15:54	0.507987	0.463259	0.539936	0.504792	0.482428	0.482428	0.498403	0.530351	0.603834	0.539936	0.546326	0.415335	0.514377	0.520767	0.514377	0.539936	0.520767	0.4377	0.472843	0.642173	0.428115	0.533546	0.428115	0.546326	0.523962	0.440895	0.41853	0.466454	0.482428	0.453674	0.42492	0.428115	0.440895	0.514377	0.638978	0.402556	0.421725	0.549521	0.488818	0.408946	0.415335	0.530351	0.456869	0.466454	0.533546	0.460064	0.533546	0.482428	0.466454
B*15:55	0.603834	0.559105	0.607029	0.600639	0.619808	0.578275	0.594249	0.667732	0.70607	0.619808	0.642173	0.511182	0.651757	0.616613	0.610224	0.635783	0.56869	0.476038	0.56869	0.738019	0.523962	0.629393	0.476038	0.543131	0.594249	0.488818	0.514377	0.5623	0.578275	0.492013	0.520767	0.523962	0.536741	0.530351	0.654952	0.41853	0.4377	0.565495	0.546326	0.405751	0.472843	0.546326	0.552716	0.482428	0.549521	0.476038	0.549521	0.498403	0.482428
B*15:56	0.536741	0.492013	0.56869	0.533546	0.511182	0.511182	0.571885	0.559105	0.613419	0.56869	0.57508	0.444089	0.543131	0.549521	0.543131	0.56869	0.549521	0.466454	0.501597	0.670927	0.456869	0.5623	0.456869	0.57508	0.552716	0.469649	0.447284	0.495208	0.511182	0.482428	0.453674	0.456869	0.469649	0.530351	0.654952	0.482428	0.4377	0.565495	0.504792	0.42492	0.43131	0.546326	0.472843	0.482428	0.549521	0.476038	0.549521	0.498403	0.482428
B*15:58	0.543131	0.498403	0.57508	0.527157	0.517572	0.56869	0.533546	0.565495	0.619808	0.57508	0.58147	0.450479	0.549521	0.555911	0.549521	0.57508	0.555911	0.520767	0.507987	0.677316	0.450479	0.56869	0.463259	0.58147	0.559105	0.463259	0.453674	0.488818	0.517572	0.463259	0.460064	0.463259	0.476038	0.536741	0.661342	0.42492	0.456869	0.571885	0.511182	0.43131	0.4377	0.552716	0.479233	0.488818	0.555911	0.482428	0.555911	0.56869	0.488818
B*15:61	0.514377	0.469649	0.517572	0.511182	0.488818	0.488818	0.504792	0.536741	0.610224	0.546326	0.552716	0.504792	0.520767	0.527157	0.520767	0.546326	0.479233	0.373802	0.479233	0.648562	0.364217	0.539936	0.316294	0.504792	0.530351	0.329073	0.354633	0.402556	0.488818	0.389776	0.361022	0.364217	0.376997	0.492013	0.616613	0.309904	0.329073	0.527157	0.466454	0.297125	0.322684	0.507987	0.463259	0.527157	0.511182	0.367412	0.511182	0.460064	0.373802
B*15:62	0.57508	0.530351	0.578275	0.571885	0.549521	0.549521	0.565495	0.495208	0.670927	0.539936	0.613419	0.482428	0.514377	0.587859	0.58147	0.607029	0.539936	0.504792	0.539936	0.709265	0.495208	0.600639	0.447284	0.565495	0.591054	0.460064	0.485623	0.533546	0.549521	0.520767	0.492013	0.495208	0.507987	0.552716	0.677316	0.440895	0.460064	0.584665	0.527157	0.428115	0.453674	0.56869	0.523962	0.504792	0.571885	0.498403	0.571885	0.520767	0.504792
B*15:63	0.520767	0.476038	0.552716	0.517572	0.495208	0.5623	0.511182	0.543131	0.597444	0.552716	0.559105	0.428115	0.527157	0.533546	0.527157	0.552716	0.533546	0.507987	0.485623	0.654952	0.440895	0.546326	0.440895	0.559105	0.536741	0.453674	0.43131	0.479233	0.495208	0.482428	0.4377	0.440895	0.453674	0.527157	0.651757	0.415335	0.434505	0.5623	0.501597	0.421725	0.428115	0.543131	0.469649	0.479233	0.546326	0.472843	0.546326	0.5623	0.479233
B*15:64	0.514377	0.469649	0.517572	0.511182	0.488818	0.488818	0.504792	0.536741	0.635783	0.546326	0.552716	0.421725	0.520767	0.527157	0.520767	0.546326	0.479233	0.444089	0.479233	0.648562	0.434505	0.539936	0.386581	0.504792	0.530351	0.399361	0.42492	0.472843	0.488818	0.460064	0.43131	0.434505	0.447284	0.492013	0.616613	0.380192	0.399361	0.527157	0.466454	0.367412	0.392971	0.507987	0.463259	0.444089	0.511182	0.4377	0.511182	0.460064	0.444089
B*15:65	0.543131	0.498403	0.578275	0.539936	0.517572	0.517572	0.533546	0.565495	0.619808	0.57508	0.58147	0.450479	0.549521	0.555911	0.549521	0.57508	0.58147	0.472843	0.507987	0.677316	0.463259	0.56869	0.488818	0.607029	0.559105	0.501597	0.453674	0.501597	0.517572	0.488818	0.460064	0.463259	0.476038	0.552716	0.677316	0.440895	0.460064	0.587859	0.527157	0.469649	0.453674	0.56869	0.492013	0.504792	0.571885	0.498403	0.571885	0.520767	0.504792
B*15:66	0.552716	0.507987	0.584665	0.549521	0.527157	0.527157	0.520767	0.57508	0.629393	0.584665	0.591054	0.460064	0.559105	0.565495	0.559105	0.584665	0.565495	0.482428	0.517572	0.686901	0.472843	0.578275	0.472843	0.591054	0.56869	0.485623	0.463259	0.511182	0.527157	0.498403	0.469649	0.472843	0.485623	0.578275	0.702875	0.472843	0.485623	0.613419	0.552716	0.472843	0.479233	0.594249	0.520767	0.530351	0.597444	0.523962	0.597444	0.546326	0.530351
B*15:67	0.837061	0.846645	0.840256	0.833866	0.811502	0.811502	0.84345	0.821086	0.881789	0.865815	0.875399	0.798722	0.840256	0.84984	0.84345	0.86901	0.801917	0.766773	0.801917	0.699681	0.757188	0.86262	0.709265	0.827476	0.853035	0.722045	0.747604	0.795527	0.811502	0.782748	0.763578	0.757188	0.769968	0.85623	0.738019	0.776358	0.763578	0.814696	0.830671	0.731629	0.757188	0.872204	0.827476	0.808307	0.84984	0.769968	0.875399	0.824281	0.808307
B*15:68	0.392971	0.348243	0.42492	0.389776	0.408946	0.367412	0.383387	0.456869	0.488818	0.466454	0.43131	0.300319	0.440895	0.405751	0.399361	0.42492	0.405751	0.469649	0.357827	0.527157	0.460064	0.41853	0.460064	0.43131	0.408946	0.472843	0.450479	0.498403	0.405751	0.485623	0.456869	0.460064	0.472843	0.456869	0.58147	0.492013	0.511182	0.492013	0.472843	0.498403	0.546326	0.472843	0.399361	0.408946	0.476038	0.549521	0.476038	0.42492	0.555911
B*15:71	0.571885	0.527157	0.603834	0.56869	0.546326	0.546326	0.5623	0.594249	0.648562	0.603834	0.610224	0.479233	0.578275	0.584665	0.578275	0.603834	0.584665	0.501597	0.536741	0.70607	0.492013	0.597444	0.492013	0.610224	0.587859	0.504792	0.482428	0.530351	0.584665	0.517572	0.488818	0.492013	0.504792	0.587859	0.71246	0.476038	0.495208	0.623003	0.5623	0.482428	0.488818	0.603834	0.530351	0.539936	0.607029	0.533546	0.607029	0.555911	0.539936
B*15:73	0.565495	0.520767	0.597444	0.549521	0.539936	0.56869	0.555911	0.587859	0.642173	0.597444	0.603834	0.472843	0.571885	0.578275	0.571885	0.597444	0.578275	0.514377	0.530351	0.699681	0.472843	0.591054	0.485623	0.603834	0.58147	0.485623	0.476038	0.511182	0.539936	0.488818	0.482428	0.485623	0.498403	0.559105	0.683706	0.447284	0.479233	0.594249	0.533546	0.453674	0.460064	0.57508	0.501597	0.511182	0.578275	0.504792	0.578275	0.56869	0.511182
B*15:75	0.571885	0.527157	0.603834	0.56869	0.546326	0.546326	0.5623	0.594249	0.648562	0.603834	0.610224	0.479233	0.578275	0.584665	0.578275	0.603834	0.584665	0.501597	0.536741	0.70607	0.492013	0.597444	0.492013	0.600639	0.584665	0.504792	0.482428	0.530351	0.546326	0.517572	0.488818	0.492013	0.504792	0.56869	0.693291	0.456869	0.476038	0.603834	0.543131	0.463259	0.469649	0.584665	0.520767	0.520767	0.587859	0.514377	0.587859	0.536741	0.520767
B*15:82	0.594249	0.549521	0.626198	0.591054	0.56869	0.56869	0.584665	0.616613	0.670927	0.626198	0.632588	0.501597	0.600639	0.607029	0.600639	0.626198	0.607029	0.523962	0.559105	0.728435	0.514377	0.619808	0.514377	0.632588	0.610224	0.527157	0.504792	0.552716	0.56869	0.539936	0.511182	0.514377	0.527157	0.600639	0.72524	0.488818	0.507987	0.635783	0.57508	0.495208	0.501597	0.616613	0.543131	0.552716	0.619808	0.546326	0.619808	0.56869	0.552716
B*15:83	0.578275	0.533546	0.549521	0.5623	0.594249	0.619808	0.56869	0.638978	0.654952	0.648562	0.616613	0.485623	0.623003	0.629393	0.584665	0.610224	0.584665	0.565495	0.543131	0.71246	0.485623	0.603834	0.476038	0.559105	0.56869	0.492013	0.488818	0.523962	0.552716	0.527157	0.495208	0.498403	0.511182	0.444089	0.56869	0.332268	0.364217	0.386581	0.460064	0.392971	0.386581	0.460064	0.498403	0.396166	0.463259	0.389776	0.463259	0.492013	0.396166
B*15:85	0.632588	0.587859	0.664537	0.629393	0.607029	0.607029	0.623003	0.552716	0.709265	0.597444	0.670927	0.539936	0.571885	0.645367	0.638978	0.664537	0.645367	0.492013	0.597444	0.766773	0.482428	0.658147	0.482428	0.670927	0.648562	0.495208	0.472843	0.520767	0.607029	0.507987	0.479233	0.482428	0.495208	0.638978	0.763578	0.456869	0.476038	0.670927	0.613419	0.463259	0.469649	0.654952	0.58147	0.591054	0.658147	0.514377	0.658147	0.607029	0.520767
B*15:88	0.670927	0.626198	0.674121	0.667732	0.645367	0.645367	0.661342	0.626198	0.773163	0.578275	0.709265	0.578275	0.610224	0.683706	0.677316	0.702875	0.635783	0.472843	0.635783	0.805112	0.520767	0.696486	0.472843	0.629393	0.661342	0.485623	0.511182	0.559105	0.645367	0.488818	0.517572	0.520767	0.533546	0.616613	0.741214	0.434505	0.453674	0.648562	0.591054	0.421725	0.447284	0.632588	0.619808	0.56869	0.635783	0.492013	0.635783	0.584665	0.498403
B*15:89	0.773163	0.728435	0.776358	0.769968	0.747604	0.747604	0.763578	0.728435	0.875399	0.680511	0.811502	0.680511	0.71246	0.785942	0.779553	0.805112	0.738019	0.57508	0.738019	0.664537	0.623003	0.798722	0.57508	0.763578	0.789137	0.587859	0.613419	0.661342	0.747604	0.591054	0.619808	0.623003	0.635783	0.750799	0.626198	0.56869	0.587859	0.782748	0.72524	0.555911	0.58147	0.766773	0.722045	0.702875	0.744409	0.594249	0.769968	0.71885	0.632588
B*15:93	0.495208	0.450479	0.498403	0.492013	0.469649	0.469649	0.463259	0.517572	0.616613	0.527157	0.533546	0.402556	0.501597	0.546326	0.501597	0.527157	0.460064	0.42492	0.460064	0.629393	0.415335	0.520767	0.351438	0.485623	0.511182	0.380192	0.405751	0.453674	0.469649	0.440895	0.412141	0.415335	0.428115	0.476038	0.600639	0.370607	0.383387	0.511182	0.450479	0.351438	0.376997	0.492013	0.447284	0.428115	0.495208	0.421725	0.495208	0.444089	0.428115
B*15:99	0.447284	0.402556	0.482428	0.444089	0.421725	0.488818	0.415335	0.469649	0.56869	0.479233	0.485623	0.354633	0.453674	0.460064	0.453674	0.479233	0.485623	0.364217	0.412141	0.58147	0.297125	0.472843	0.322684	0.511182	0.463259	0.335463	0.28754	0.335463	0.421725	0.338658	0.29393	0.297125	0.309904	0.476038	0.600639	0.300319	0.313099	0.511182	0.450479	0.322684	0.306709	0.492013	0.415335	0.428115	0.495208	0.351438	0.495208	0.511182	0.357827
B*15:107	0.58147	0.536741	0.584665	0.578275	0.555911	0.555911	0.571885	0.603834	0.658147	0.613419	0.619808	0.488818	0.587859	0.594249	0.587859	0.613419	0.546326	0.511182	0.546326	0.715655	0.501597	0.607029	0.453674	0.520767	0.571885	0.466454	0.492013	0.539936	0.555911	0.527157	0.498403	0.501597	0.514377	0.507987	0.632588	0.396166	0.415335	0.543131	0.482428	0.383387	0.408946	0.523962	0.530351	0.460064	0.527157	0.453674	0.527157	0.476038	0.460064
B*15:108	0.514377	0.469649	0.517572	0.511182	0.488818	0.488818	0.482428	0.536741	0.635783	0.546326	0.552716	0.421725	0.520767	0.527157	0.520767	0.546326	0.479233	0.444089	0.479233	0.648562	0.434505	0.539936	0.386581	0.504792	0.530351	0.399361	0.42492	0.472843	0.488818	0.460064	0.43131	0.434505	0.447284	0.511182	0.635783	0.405751	0.41853	0.546326	0.485623	0.386581	0.412141	0.527157	0.482428	0.463259	0.530351	0.456869	0.530351	0.479233	0.463259
B*15:109	0.635783	0.591054	0.667732	0.632588	0.610224	0.610224	0.626198	0.658147	0.71246	0.667732	0.674121	0.543131	0.642173	0.648562	0.642173	0.667732	0.648562	0.495208	0.600639	0.769968	0.485623	0.661342	0.485623	0.674121	0.651757	0.498403	0.476038	0.523962	0.610224	0.511182	0.482428	0.485623	0.498403	0.642173	0.766773	0.460064	0.479233	0.677316	0.616613	0.466454	0.472843	0.658147	0.584665	0.594249	0.661342	0.517572	0.661342	0.610224	0.523962
B*15:110	0.594249	0.549521	0.626198	0.591054	0.56869	0.56869	0.584665	0.616613	0.670927	0.626198	0.632588	0.501597	0.600639	0.607029	0.600639	0.626198	0.607029	0.523962	0.559105	0.728435	0.514377	0.619808	0.514377	0.632588	0.610224	0.527157	0.504792	0.552716	0.56869	0.539936	0.511182	0.514377	0.527157	0.600639	0.72524	0.488818	0.507987	0.635783	0.57508	0.495208	0.501597	0.616613	0.543131	0.552716	0.619808	0.546326	0.619808	0.56869	0.552716
B*15:113	0.57508	0.530351	0.607029	0.571885	0.549521	0.549521	0.565495	0.597444	0.651757	0.607029	0.613419	0.482428	0.58147	0.587859	0.58147	0.607029	0.587859	0.504792	0.539936	0.709265	0.495208	0.600639	0.495208	0.613419	0.591054	0.507987	0.485623	0.533546	0.549521	0.520767	0.492013	0.495208	0.507987	0.58147	0.70607	0.469649	0.488818	0.616613	0.555911	0.476038	0.482428	0.597444	0.523962	0.533546	0.600639	0.527157	0.600639	0.549521	0.533546
B*15:114	0.530351	0.485623	0.533546	0.527157	0.504792	0.504792	0.498403	0.552716	0.651757	0.5623	0.56869	0.4377	0.536741	0.610224	0.536741	0.5623	0.495208	0.389776	0.495208	0.664537	0.380192	0.555911	0.361022	0.469649	0.520767	0.345048	0.370607	0.41853	0.504792	0.405751	0.376997	0.380192	0.392971	0.504792	0.629393	0.329073	0.341853	0.539936	0.479233	0.309904	0.335463	0.520767	0.527157	0.456869	0.523962	0.380192	0.523962	0.472843	0.386581
B*15:123	0.584665	0.539936	0.587859	0.58147	0.559105	0.559105	0.57508	0.607029	0.680511	0.616613	0.623003	0.492013	0.591054	0.597444	0.591054	0.616613	0.549521	0.514377	0.549521	0.71885	0.504792	0.610224	0.456869	0.523962	0.57508	0.469649	0.495208	0.543131	0.559105	0.530351	0.501597	0.504792	0.517572	0.511182	0.635783	0.399361	0.41853	0.546326	0.485623	0.386581	0.412141	0.527157	0.533546	0.463259	0.530351	0.456869	0.530351	0.479233	0.463259
B*15:124	0.578275	0.533546	0.58147	0.57508	0.552716	0.552716	0.546326	0.600639	0.699681	0.610224	0.616613	0.485623	0.584665	0.658147	0.584665	0.610224	0.543131	0.4377	0.543131	0.71246	0.428115	0.603834	0.408946	0.517572	0.56869	0.392971	0.41853	0.466454	0.552716	0.453674	0.42492	0.428115	0.440895	0.552716	0.677316	0.376997	0.389776	0.587859	0.527157	0.357827	0.383387	0.56869	0.57508	0.504792	0.571885	0.428115	0.571885	0.520767	0.434505
B*15:128	0.610224	0.565495	0.642173	0.607029	0.584665	0.584665	0.600639	0.632588	0.686901	0.584665	0.648562	0.517572	0.616613	0.623003	0.616613	0.642173	0.623003	0.412141	0.57508	0.744409	0.460064	0.635783	0.460064	0.648562	0.626198	0.472843	0.450479	0.498403	0.584665	0.428115	0.456869	0.460064	0.472843	0.616613	0.741214	0.434505	0.453674	0.651757	0.591054	0.440895	0.447284	0.632588	0.559105	0.56869	0.635783	0.492013	0.635783	0.584665	0.498403
B*15:132	0.565495	0.520767	0.56869	0.5623	0.539936	0.539936	0.555911	0.587859	0.661342	0.597444	0.603834	0.472843	0.571885	0.578275	0.571885	0.597444	0.530351	0.495208	0.530351	0.699681	0.485623	0.591054	0.4377	0.555911	0.58147	0.450479	0.476038	0.523962	0.539936	0.511182	0.482428	0.485623	0.498403	0.543131	0.667732	0.43131	0.450479	0.578275	0.517572	0.41853	0.444089	0.559105	0.514377	0.495208	0.5623	0.488818	0.5623	0.511182	0.495208
B*15:138	0.539936	0.495208	0.543131	0.536741	0.514377	0.514377	0.530351	0.5623	0.616613	0.571885	0.578275	0.447284	0.546326	0.619808	0.546326	0.571885	0.504792	0.399361	0.571885	0.674121	0.405751	0.565495	0.370607	0.530351	0.555911	0.354633	0.386581	0.428115	0.514377	0.415335	0.386581	0.389776	0.402556	0.584665	0.709265	0.402556	0.421725	0.619808	0.559105	0.389776	0.415335	0.600639	0.555911	0.536741	0.603834	0.460064	0.603834	0.552716	0.466454
B*15:141	0.527157	0.482428	0.559105	0.523962	0.543131	0.501597	0.517572	0.591054	0.603834	0.600639	0.565495	0.434505	0.57508	0.539936	0.533546	0.559105	0.539936	0.456869	0.492013	0.661342	0.447284	0.552716	0.447284	0.565495	0.543131	0.460064	0.4377	0.485623	0.501597	0.472843	0.444089	0.447284	0.460064	0.533546	0.658147	0.421725	0.440895	0.552716	0.549521	0.428115	0.476038	0.549521	0.476038	0.485623	0.552716	0.479233	0.552716	0.501597	0.485623
B*15:148	0.549521	0.504792	0.58147	0.546326	0.523962	0.523962	0.58147	0.571885	0.651757	0.58147	0.587859	0.456869	0.555911	0.5623	0.555911	0.58147	0.5623	0.408946	0.514377	0.683706	0.399361	0.57508	0.399361	0.587859	0.565495	0.412141	0.389776	0.4377	0.523962	0.42492	0.396166	0.399361	0.412141	0.571885	0.696486	0.440895	0.408946	0.607029	0.546326	0.396166	0.402556	0.587859	0.514377	0.523962	0.591054	0.447284	0.591054	0.539936	0.453674
B*15:150	0.501597	0.456869	0.533546	0.485623	0.476038	0.543131	0.492013	0.523962	0.578275	0.533546	0.539936	0.408946	0.507987	0.514377	0.507987	0.533546	0.514377	0.488818	0.466454	0.635783	0.408946	0.527157	0.421725	0.539936	0.517572	0.421725	0.412141	0.447284	0.476038	0.450479	0.41853	0.421725	0.434505	0.495208	0.619808	0.383387	0.415335	0.530351	0.469649	0.389776	0.396166	0.511182	0.4377	0.447284	0.514377	0.440895	0.514377	0.543131	0.447284
B*15:152	0.543131	0.498403	0.57508	0.539936	0.517572	0.517572	0.57508	0.565495	0.619808	0.57508	0.58147	0.450479	0.549521	0.555911	0.549521	0.57508	0.555911	0.402556	0.507987	0.677316	0.392971	0.56869	0.392971	0.58147	0.559105	0.405751	0.383387	0.43131	0.517572	0.41853	0.389776	0.392971	0.405751	0.565495	0.690096	0.434505	0.402556	0.600639	0.539936	0.389776	0.396166	0.58147	0.507987	0.517572	0.584665	0.440895	0.584665	0.533546	0.447284
B*15:153	0.514377	0.469649	0.517572	0.511182	0.488818	0.488818	0.482428	0.536741	0.635783	0.546326	0.552716	0.421725	0.520767	0.527157	0.520767	0.546326	0.479233	0.444089	0.479233	0.648562	0.434505	0.539936	0.386581	0.504792	0.530351	0.399361	0.42492	0.472843	0.488818	0.460064	0.43131	0.434505	0.447284	0.511182	0.635783	0.405751	0.41853	0.546326	0.485623	0.386581	0.412141	0.527157	0.482428	0.463259	0.530351	0.456869	0.530351	0.479233	0.463259
B*15:157	0.731629	0.686901	0.763578	0.728435	0.70607	0.70607	0.722045	0.753994	0.808307	0.763578	0.769968	0.638978	0.738019	0.744409	0.738019	0.763578	0.744409	0.591054	0.696486	0.594249	0.58147	0.757188	0.58147	0.769968	0.747604	0.594249	0.571885	0.619808	0.70607	0.607029	0.578275	0.58147	0.594249	0.738019	0.619808	0.555911	0.57508	0.773163	0.71246	0.5623	0.56869	0.753994	0.680511	0.690096	0.731629	0.58147	0.757188	0.70607	0.619808
B*15:158	0.543131	0.498403	0.546326	0.539936	0.517572	0.517572	0.533546	0.565495	0.638978	0.57508	0.58147	0.450479	0.549521	0.555911	0.549521	0.565495	0.507987	0.472843	0.507987	0.677316	0.463259	0.56869	0.415335	0.533546	0.559105	0.428115	0.453674	0.501597	0.517572	0.488818	0.460064	0.463259	0.476038	0.520767	0.645367	0.408946	0.428115	0.555911	0.495208	0.396166	0.421725	0.536741	0.492013	0.472843	0.539936	0.466454	0.539936	0.488818	0.472843
B*15:170	0.664537	0.619808	0.667732	0.661342	0.638978	0.638978	0.654952	0.619808	0.766773	0.571885	0.702875	0.571885	0.603834	0.677316	0.670927	0.696486	0.629393	0.466454	0.629393	0.798722	0.514377	0.690096	0.466454	0.654952	0.680511	0.479233	0.504792	0.552716	0.638978	0.482428	0.511182	0.514377	0.527157	0.642173	0.766773	0.460064	0.479233	0.674121	0.616613	0.447284	0.472843	0.658147	0.613419	0.594249	0.661342	0.517572	0.661342	0.610224	0.523962
B*15:175	0.626198	0.58147	0.658147	0.623003	0.600639	0.600639	0.616613	0.648562	0.702875	0.658147	0.664537	0.533546	0.632588	0.638978	0.632588	0.658147	0.638978	0.485623	0.591054	0.760383	0.476038	0.651757	0.476038	0.664537	0.642173	0.488818	0.466454	0.514377	0.638978	0.501597	0.472843	0.476038	0.488818	0.642173	0.766773	0.460064	0.479233	0.677316	0.616613	0.466454	0.472843	0.658147	0.584665	0.594249	0.661342	0.517572	0.661342	0.610224	0.523962
B*15:191	0.5623	0.517572	0.594249	0.559105	0.536741	0.536741	0.597444	0.584665	0.664537	0.594249	0.600639	0.469649	0.56869	0.57508	0.56869	0.594249	0.57508	0.421725	0.527157	0.696486	0.412141	0.587859	0.412141	0.600639	0.578275	0.42492	0.402556	0.450479	0.549521	0.4377	0.408946	0.412141	0.42492	0.56869	0.693291	0.450479	0.405751	0.603834	0.543131	0.392971	0.399361	0.584665	0.511182	0.520767	0.587859	0.444089	0.587859	0.536741	0.450479
B*15:202	0.578275	0.533546	0.610224	0.57508	0.552716	0.552716	0.56869	0.600639	0.654952	0.610224	0.616613	0.485623	0.584665	0.591054	0.584665	0.610224	0.591054	0.4377	0.543131	0.71246	0.428115	0.603834	0.428115	0.616613	0.594249	0.440895	0.41853	0.466454	0.552716	0.453674	0.42492	0.428115	0.440895	0.584665	0.709265	0.402556	0.421725	0.619808	0.559105	0.408946	0.415335	0.600639	0.527157	0.536741	0.603834	0.460064	0.603834	0.552716	0.466454
B*15:204	0.693291	0.648562	0.696486	0.690096	0.667732	0.667732	0.683706	0.648562	0.769968	0.600639	0.731629	0.600639	0.632588	0.70607	0.699681	0.72524	0.658147	0.495208	0.658147	0.827476	0.543131	0.71885	0.495208	0.683706	0.709265	0.507987	0.533546	0.58147	0.667732	0.511182	0.539936	0.543131	0.555911	0.623003	0.747604	0.440895	0.460064	0.654952	0.597444	0.428115	0.453674	0.638978	0.594249	0.57508	0.642173	0.498403	0.642173	0.591054	0.504792
B*15:212	0.623003	0.578275	0.654952	0.619808	0.597444	0.597444	0.613419	0.645367	0.70607	0.654952	0.661342	0.530351	0.629393	0.635783	0.629393	0.654952	0.635783	0.482428	0.587859	0.757188	0.472843	0.648562	0.472843	0.661342	0.638978	0.485623	0.463259	0.511182	0.597444	0.498403	0.469649	0.472843	0.485623	0.58147	0.70607	0.399361	0.41853	0.616613	0.555911	0.405751	0.412141	0.597444	0.523962	0.533546	0.600639	0.456869	0.600639	0.549521	0.463259
B*15:223	0.600639	0.555911	0.603834	0.597444	0.57508	0.57508	0.591054	0.555911	0.702875	0.565495	0.638978	0.507987	0.539936	0.613419	0.607029	0.632588	0.565495	0.530351	0.565495	0.734824	0.520767	0.626198	0.472843	0.591054	0.616613	0.485623	0.511182	0.559105	0.57508	0.546326	0.517572	0.520767	0.533546	0.578275	0.702875	0.466454	0.485623	0.610224	0.552716	0.453674	0.479233	0.594249	0.549521	0.530351	0.597444	0.523962	0.597444	0.546326	0.530351
B*18:01	0.670927	0.626198	0.674121	0.667732	0.645367	0.645367	0.661342	0.693291	0.773163	0.702875	0.709265	0.578275	0.677316	0.722045	0.677316	0.702875	0.635783	0.530351	0.635783	0.805112	0.520767	0.696486	0.456869	0.610224	0.661342	0.485623	0.511182	0.559105	0.683706	0.546326	0.517572	0.520767	0.533546	0.591054	0.715655	0.408946	0.428115	0.626198	0.565495	0.396166	0.421725	0.607029	0.613419	0.543131	0.610224	0.466454	0.610224	0.559105	0.472843
B*18:02	0.664537	0.619808	0.667732	0.661342	0.674121	0.638978	0.654952	0.722045	0.766773	0.731629	0.702875	0.571885	0.70607	0.715655	0.670927	0.696486	0.629393	0.523962	0.629393	0.798722	0.514377	0.690096	0.450479	0.603834	0.654952	0.479233	0.504792	0.552716	0.677316	0.539936	0.511182	0.514377	0.527157	0.584665	0.709265	0.402556	0.421725	0.616613	0.594249	0.389776	0.450479	0.600639	0.607029	0.536741	0.603834	0.460064	0.603834	0.552716	0.466454
B*18:03	0.635783	0.591054	0.638978	0.632588	0.610224	0.610224	0.626198	0.658147	0.738019	0.667732	0.674121	0.626198	0.642173	0.686901	0.642173	0.667732	0.600639	0.495208	0.600639	0.769968	0.485623	0.661342	0.421725	0.57508	0.626198	0.450479	0.476038	0.523962	0.648562	0.511182	0.482428	0.485623	0.498403	0.555911	0.680511	0.373802	0.392971	0.591054	0.530351	0.361022	0.386581	0.571885	0.578275	0.591054	0.57508	0.43131	0.57508	0.523962	0.4377
B*18:04	0.670927	0.626198	0.674121	0.667732	0.645367	0.645367	0.661342	0.693291	0.773163	0.702875	0.709265	0.578275	0.677316	0.722045	0.677316	0.702875	0.635783	0.530351	0.635783	0.805112	0.520767	0.696486	0.456869	0.610224	0.661342	0.485623	0.511182	0.559105	0.645367	0.546326	0.517572	0.520767	0.533546	0.58147	0.70607	0.399361	0.41853	0.616613	0.555911	0.386581	0.412141	0.597444	0.603834	0.533546	0.600639	0.456869	0.600639	0.549521	0.463259
B*18:05	0.683706	0.638978	0.686901	0.680511	0.658147	0.658147	0.674121	0.70607	0.785942	0.715655	0.722045	0.591054	0.690096	0.734824	0.690096	0.715655	0.648562	0.543131	0.648562	0.817891	0.533546	0.709265	0.469649	0.623003	0.674121	0.498403	0.523962	0.571885	0.696486	0.559105	0.530351	0.533546	0.546326	0.603834	0.728435	0.421725	0.440895	0.638978	0.578275	0.408946	0.434505	0.619808	0.626198	0.555911	0.623003	0.479233	0.623003	0.571885	0.485623
B*18:06	0.696486	0.651757	0.699681	0.693291	0.670927	0.670927	0.686901	0.71885	0.747604	0.728435	0.683706	0.603834	0.702875	0.747604	0.702875	0.728435	0.661342	0.555911	0.661342	0.830671	0.546326	0.722045	0.482428	0.635783	0.686901	0.511182	0.536741	0.584665	0.709265	0.571885	0.543131	0.546326	0.559105	0.616613	0.741214	0.434505	0.453674	0.651757	0.591054	0.421725	0.447284	0.632588	0.638978	0.56869	0.635783	0.492013	0.635783	0.584665	0.498403
B*18:07	0.645367	0.600639	0.648562	0.642173	0.619808	0.619808	0.680511	0.667732	0.747604	0.677316	0.683706	0.552716	0.651757	0.696486	0.651757	0.677316	0.610224	0.504792	0.610224	0.779553	0.495208	0.670927	0.43131	0.584665	0.635783	0.460064	0.485623	0.533546	0.658147	0.520767	0.492013	0.495208	0.507987	0.552716	0.677316	0.434505	0.389776	0.587859	0.527157	0.357827	0.383387	0.56869	0.57508	0.504792	0.571885	0.428115	0.571885	0.520767	0.434505
B*18:09	0.795527	0.750799	0.798722	0.792332	0.769968	0.769968	0.785942	0.817891	0.897764	0.827476	0.833866	0.702875	0.801917	0.846645	0.801917	0.827476	0.760383	0.654952	0.760383	0.686901	0.645367	0.821086	0.58147	0.734824	0.785942	0.610224	0.635783	0.683706	0.808307	0.670927	0.642173	0.645367	0.658147	0.715655	0.591054	0.533546	0.552716	0.750799	0.690096	0.520767	0.546326	0.731629	0.738019	0.667732	0.709265	0.559105	0.734824	0.683706	0.597444
B*18:11	0.638978	0.594249	0.642173	0.635783	0.613419	0.613419	0.629393	0.661342	0.741214	0.670927	0.677316	0.546326	0.645367	0.690096	0.645367	0.670927	0.603834	0.498403	0.603834	0.773163	0.488818	0.664537	0.42492	0.578275	0.629393	0.453674	0.479233	0.527157	0.651757	0.514377	0.485623	0.488818	0.501597	0.559105	0.683706	0.376997	0.396166	0.594249	0.533546	0.364217	0.389776	0.57508	0.58147	0.511182	0.578275	0.434505	0.578275	0.527157	0.440895
B*18:12	0.683706	0.638978	0.686901	0.680511	0.658147	0.658147	0.674121	0.70607	0.760383	0.715655	0.722045	0.591054	0.690096	0.734824	0.690096	0.715655	0.648562	0.543131	0.648562	0.817891	0.533546	0.709265	0.469649	0.623003	0.674121	0.498403	0.523962	0.571885	0.696486	0.559105	0.530351	0.533546	0.546326	0.603834	0.728435	0.421725	0.440895	0.638978	0.578275	0.408946	0.434505	0.619808	0.626198	0.555911	0.623003	0.479233	0.623003	0.571885	0.485623
B*18:13	0.632588	0.587859	0.667732	0.629393	0.607029	0.607029	0.623003	0.654952	0.734824	0.664537	0.670927	0.539936	0.638978	0.683706	0.638978	0.664537	0.670927	0.492013	0.597444	0.766773	0.482428	0.658147	0.492013	0.645367	0.623003	0.520767	0.472843	0.520767	0.645367	0.507987	0.479233	0.482428	0.495208	0.584665	0.709265	0.402556	0.421725	0.619808	0.559105	0.43131	0.415335	0.600639	0.57508	0.536741	0.603834	0.460064	0.603834	0.552716	0.466454
B*18:14	0.654952	0.610224	0.658147	0.651757	0.670927	0.629393	0.645367	0.71885	0.757188	0.728435	0.693291	0.5623	0.702875	0.70607	0.661342	0.686901	0.619808	0.514377	0.619808	0.789137	0.504792	0.680511	0.440895	0.594249	0.645367	0.469649	0.495208	0.543131	0.667732	0.530351	0.501597	0.504792	0.517572	0.57508	0.699681	0.392971	0.412141	0.610224	0.591054	0.380192	0.447284	0.591054	0.597444	0.527157	0.594249	0.450479	0.594249	0.543131	0.456869
B*18:18	0.71246	0.667732	0.715655	0.709265	0.686901	0.686901	0.702875	0.734824	0.814696	0.744409	0.750799	0.619808	0.71885	0.763578	0.71885	0.744409	0.677316	0.571885	0.677316	0.846645	0.5623	0.738019	0.498403	0.651757	0.702875	0.527157	0.552716	0.600639	0.72524	0.587859	0.559105	0.5623	0.57508	0.632588	0.757188	0.450479	0.469649	0.667732	0.607029	0.4377	0.463259	0.648562	0.654952	0.584665	0.651757	0.507987	0.651757	0.600639	0.514377
B*18:19	0.626198	0.58147	0.658147	0.623003	0.600639	0.600639	0.616613	0.648562	0.728435	0.658147	0.664537	0.533546	0.632588	0.677316	0.632588	0.658147	0.638978	0.485623	0.591054	0.760383	0.476038	0.651757	0.460064	0.664537	0.642173	0.488818	0.466454	0.514377	0.638978	0.501597	0.472843	0.476038	0.488818	0.626198	0.750799	0.444089	0.463259	0.661342	0.600639	0.450479	0.456869	0.642173	0.56869	0.578275	0.645367	0.501597	0.645367	0.594249	0.507987
B*18:20	0.696486	0.651757	0.699681	0.693291	0.670927	0.670927	0.686901	0.71885	0.798722	0.670927	0.734824	0.603834	0.702875	0.747604	0.702875	0.728435	0.661342	0.498403	0.661342	0.830671	0.546326	0.722045	0.482428	0.635783	0.686901	0.511182	0.536741	0.584665	0.709265	0.514377	0.543131	0.546326	0.559105	0.616613	0.741214	0.434505	0.453674	0.651757	0.591054	0.421725	0.447284	0.632588	0.638978	0.56869	0.635783	0.492013	0.635783	0.584665	0.498403
B*18:22	0.667732	0.623003	0.670927	0.664537	0.683706	0.642173	0.658147	0.629393	0.769968	0.674121	0.70607	0.57508	0.648562	0.71885	0.674121	0.699681	0.632588	0.527157	0.632588	0.801917	0.517572	0.693291	0.453674	0.607029	0.658147	0.482428	0.507987	0.555911	0.680511	0.543131	0.514377	0.517572	0.530351	0.587859	0.71246	0.405751	0.42492	0.619808	0.603834	0.392971	0.460064	0.603834	0.610224	0.539936	0.607029	0.463259	0.607029	0.555911	0.469649
B*18:25	0.645367	0.600639	0.648562	0.642173	0.619808	0.619808	0.635783	0.667732	0.747604	0.677316	0.683706	0.552716	0.651757	0.696486	0.651757	0.677316	0.610224	0.504792	0.610224	0.779553	0.495208	0.670927	0.43131	0.584665	0.635783	0.460064	0.485623	0.533546	0.619808	0.520767	0.492013	0.495208	0.507987	0.555911	0.680511	0.373802	0.392971	0.591054	0.530351	0.361022	0.386581	0.571885	0.578275	0.507987	0.57508	0.43131	0.57508	0.523962	0.4377
B*18:26	0.635783	0.591054	0.638978	0.619808	0.610224	0.677316	0.626198	0.658147	0.738019	0.667732	0.674121	0.543131	0.642173	0.686901	0.642173	0.667732	0.600639	0.552716	0.600639	0.769968	0.472843	0.661342	0.421725	0.57508	0.626198	0.4377	0.476038	0.511182	0.648562	0.514377	0.482428	0.485623	0.498403	0.543131	0.667732	0.361022	0.392971	0.578275	0.517572	0.348243	0.373802	0.559105	0.565495	0.495208	0.5623	0.41853	0.5623	0.591054	0.42492
B*18:29	0.600639	0.555911	0.603834	0.597444	0.57508	0.57508	0.635783	0.623003	0.702875	0.632588	0.638978	0.507987	0.607029	0.651757	0.607029	0.632588	0.565495	0.460064	0.565495	0.734824	0.450479	0.626198	0.386581	0.539936	0.591054	0.415335	0.440895	0.488818	0.613419	0.476038	0.447284	0.450479	0.463259	0.507987	0.632588	0.389776	0.345048	0.543131	0.482428	0.313099	0.338658	0.523962	0.530351	0.460064	0.527157	0.383387	0.527157	0.476038	0.389776
B*18:33	0.661342	0.616613	0.664537	0.658147	0.635783	0.635783	0.629393	0.683706	0.763578	0.693291	0.699681	0.56869	0.667732	0.71246	0.667732	0.693291	0.626198	0.520767	0.626198	0.795527	0.511182	0.686901	0.447284	0.600639	0.651757	0.476038	0.501597	0.549521	0.674121	0.536741	0.507987	0.511182	0.523962	0.600639	0.72524	0.42492	0.4377	0.635783	0.57508	0.405751	0.43131	0.616613	0.623003	0.552716	0.619808	0.476038	0.619808	0.56869	0.482428
B*27:01	0.709265	0.72524	0.71246	0.70607	0.71885	0.693291	0.677316	0.766773	0.814696	0.71885	0.747604	0.677316	0.750799	0.789137	0.715655	0.741214	0.674121	0.571885	0.674121	0.600639	0.629393	0.734824	0.626198	0.648562	0.699681	0.594249	0.635783	0.667732	0.722045	0.603834	0.651757	0.645367	0.658147	0.738019	0.613419	0.648562	0.677316	0.769968	0.747604	0.629393	0.690096	0.753994	0.760383	0.690096	0.731629	0.667732	0.757188	0.731629	0.70607
B*27:02	0.683706	0.699681	0.686901	0.680511	0.693291	0.667732	0.651757	0.741214	0.789137	0.693291	0.722045	0.734824	0.72524	0.763578	0.690096	0.715655	0.648562	0.546326	0.648562	0.546326	0.603834	0.709265	0.600639	0.623003	0.674121	0.56869	0.610224	0.642173	0.696486	0.578275	0.626198	0.619808	0.632588	0.71246	0.594249	0.623003	0.651757	0.744409	0.722045	0.603834	0.664537	0.728435	0.734824	0.747604	0.70607	0.642173	0.731629	0.70607	0.680511
B*27:03	0.683706	0.699681	0.686901	0.680511	0.693291	0.667732	0.651757	0.741214	0.789137	0.693291	0.722045	0.734824	0.72524	0.763578	0.690096	0.715655	0.648562	0.546326	0.648562	0.626198	0.603834	0.709265	0.600639	0.623003	0.674121	0.56869	0.610224	0.642173	0.696486	0.578275	0.626198	0.619808	0.632588	0.71246	0.638978	0.623003	0.651757	0.744409	0.722045	0.603834	0.664537	0.728435	0.734824	0.747604	0.70607	0.642173	0.731629	0.70607	0.680511
B*27:04	0.619808	0.635783	0.623003	0.616613	0.629393	0.603834	0.587859	0.677316	0.72524	0.629393	0.658147	0.670927	0.661342	0.699681	0.626198	0.651757	0.584665	0.482428	0.584665	0.584665	0.539936	0.645367	0.536741	0.610224	0.635783	0.504792	0.546326	0.578275	0.632588	0.514377	0.5623	0.555911	0.56869	0.699681	0.648562	0.610224	0.638978	0.731629	0.709265	0.591054	0.651757	0.715655	0.670927	0.734824	0.693291	0.629393	0.71885	0.693291	0.667732
B*27:05	0.651757	0.667732	0.654952	0.648562	0.661342	0.635783	0.619808	0.709265	0.757188	0.661342	0.690096	0.702875	0.693291	0.731629	0.658147	0.683706	0.616613	0.514377	0.616613	0.594249	0.571885	0.677316	0.56869	0.591054	0.642173	0.536741	0.578275	0.610224	0.664537	0.546326	0.594249	0.587859	0.600639	0.680511	0.607029	0.591054	0.619808	0.71246	0.690096	0.571885	0.632588	0.696486	0.702875	0.715655	0.674121	0.610224	0.699681	0.674121	0.648562
B*27:06	0.552716	0.56869	0.555911	0.565495	0.5623	0.594249	0.520767	0.610224	0.658147	0.5623	0.591054	0.603834	0.594249	0.632588	0.559105	0.584665	0.517572	0.498403	0.517572	0.517572	0.488818	0.578275	0.469649	0.543131	0.56869	0.453674	0.479233	0.527157	0.565495	0.472843	0.495208	0.488818	0.501597	0.648562	0.597444	0.559105	0.571885	0.680511	0.658147	0.539936	0.600639	0.664537	0.619808	0.683706	0.642173	0.578275	0.667732	0.683706	0.616613
B*27:07	0.530351	0.546326	0.533546	0.530351	0.546326	0.571885	0.498403	0.594249	0.635783	0.603834	0.56869	0.58147	0.578275	0.610224	0.536741	0.5623	0.495208	0.533546	0.495208	0.472843	0.453674	0.555911	0.447284	0.469649	0.520767	0.41853	0.456869	0.492013	0.543131	0.495208	0.472843	0.466454	0.479233	0.5623	0.488818	0.472843	0.498403	0.597444	0.578275	0.453674	0.520767	0.578275	0.584665	0.597444	0.555911	0.492013	0.58147	0.610224	0.530351
B*27:08	0.549521	0.565495	0.552716	0.546326	0.559105	0.533546	0.517572	0.607029	0.654952	0.559105	0.587859	0.600639	0.591054	0.629393	0.555911	0.58147	0.514377	0.412141	0.514377	0.683706	0.469649	0.57508	0.466454	0.488818	0.539936	0.434505	0.476038	0.507987	0.5623	0.444089	0.492013	0.485623	0.498403	0.578275	0.702875	0.488818	0.517572	0.610224	0.587859	0.469649	0.530351	0.594249	0.600639	0.613419	0.597444	0.539936	0.597444	0.571885	0.546326
B*27:09	0.635783	0.651757	0.638978	0.632588	0.645367	0.638978	0.603834	0.693291	0.741214	0.645367	0.674121	0.686901	0.677316	0.715655	0.642173	0.667732	0.600639	0.533546	0.600639	0.578275	0.555911	0.661342	0.552716	0.57508	0.626198	0.520767	0.5623	0.594249	0.648562	0.530351	0.578275	0.571885	0.584665	0.664537	0.591054	0.57508	0.603834	0.696486	0.674121	0.555911	0.616613	0.680511	0.686901	0.699681	0.658147	0.594249	0.683706	0.677316	0.632588
B*27:10	0.626198	0.642173	0.629393	0.623003	0.635783	0.610224	0.594249	0.683706	0.731629	0.635783	0.664537	0.677316	0.667732	0.70607	0.632588	0.658147	0.591054	0.488818	0.591054	0.56869	0.546326	0.651757	0.543131	0.616613	0.642173	0.511182	0.552716	0.584665	0.638978	0.520767	0.56869	0.5623	0.57508	0.70607	0.632588	0.616613	0.645367	0.738019	0.715655	0.597444	0.658147	0.722045	0.677316	0.741214	0.699681	0.635783	0.72524	0.699681	0.674121
B*27:11	0.514377	0.530351	0.517572	0.514377	0.530351	0.555911	0.482428	0.578275	0.619808	0.587859	0.552716	0.565495	0.5623	0.594249	0.520767	0.546326	0.479233	0.517572	0.479233	0.479233	0.4377	0.539936	0.43131	0.453674	0.504792	0.402556	0.440895	0.476038	0.527157	0.479233	0.456869	0.450479	0.463259	0.546326	0.495208	0.456869	0.482428	0.58147	0.5623	0.4377	0.504792	0.5623	0.56869	0.58147	0.539936	0.476038	0.565495	0.594249	0.514377
B*27:12	0.571885	0.527157	0.57508	0.56869	0.58147	0.555911	0.539936	0.629393	0.667732	0.58147	0.610224	0.5623	0.613419	0.651757	0.578275	0.603834	0.536741	0.434505	0.536741	0.70607	0.492013	0.597444	0.488818	0.511182	0.5623	0.456869	0.498403	0.530351	0.584665	0.466454	0.504792	0.507987	0.520767	0.539936	0.664537	0.450479	0.479233	0.571885	0.549521	0.43131	0.492013	0.555911	0.5623	0.57508	0.559105	0.501597	0.559105	0.533546	0.507987
B*27:14	0.693291	0.709265	0.696486	0.690096	0.709265	0.677316	0.661342	0.71885	0.798722	0.70607	0.731629	0.744409	0.738019	0.773163	0.699681	0.72524	0.658147	0.555911	0.658147	0.635783	0.613419	0.71885	0.610224	0.632588	0.683706	0.578275	0.619808	0.651757	0.70607	0.587859	0.635783	0.629393	0.642173	0.722045	0.648562	0.632588	0.661342	0.664537	0.738019	0.613419	0.680511	0.738019	0.744409	0.757188	0.715655	0.651757	0.741214	0.715655	0.690096
B*27:15	0.642173	0.658147	0.645367	0.638978	0.651757	0.626198	0.610224	0.699681	0.747604	0.651757	0.680511	0.693291	0.683706	0.693291	0.648562	0.674121	0.607029	0.504792	0.607029	0.607029	0.5623	0.667732	0.514377	0.632588	0.658147	0.527157	0.56869	0.600639	0.654952	0.536741	0.584665	0.578275	0.591054	0.677316	0.626198	0.587859	0.616613	0.709265	0.686901	0.56869	0.629393	0.693291	0.648562	0.71246	0.670927	0.607029	0.696486	0.670927	0.645367
B*27:18	0.638978	0.594249	0.642173	0.619808	0.648562	0.623003	0.629393	0.696486	0.734824	0.648562	0.677316	0.546326	0.680511	0.71885	0.645367	0.670927	0.603834	0.415335	0.603834	0.773163	0.472843	0.664537	0.469649	0.629393	0.654952	0.4377	0.479233	0.511182	0.651757	0.447284	0.485623	0.488818	0.501597	0.638978	0.763578	0.456869	0.492013	0.670927	0.648562	0.444089	0.504792	0.654952	0.610224	0.591054	0.658147	0.514377	0.658147	0.632588	0.520767
B*27:19	0.690096	0.70607	0.693291	0.686901	0.664537	0.674121	0.658147	0.645367	0.795527	0.597444	0.728435	0.741214	0.629393	0.769968	0.696486	0.722045	0.654952	0.552716	0.654952	0.632588	0.610224	0.715655	0.607029	0.629393	0.680511	0.57508	0.616613	0.648562	0.702875	0.584665	0.632588	0.626198	0.638978	0.71885	0.645367	0.629393	0.658147	0.750799	0.693291	0.610224	0.635783	0.734824	0.741214	0.753994	0.71246	0.648562	0.738019	0.71246	0.686901
B*27:20	0.507987	0.523962	0.511182	0.507987	0.517572	0.549521	0.476038	0.565495	0.613419	0.57508	0.546326	0.559105	0.549521	0.587859	0.514377	0.539936	0.472843	0.511182	0.472843	0.472843	0.43131	0.533546	0.42492	0.498403	0.523962	0.396166	0.434505	0.469649	0.520767	0.472843	0.450479	0.444089	0.456869	0.591054	0.539936	0.501597	0.527157	0.623003	0.600639	0.482428	0.543131	0.607029	0.5623	0.626198	0.584665	0.520767	0.610224	0.638978	0.559105
B*27:21	0.5623	0.578275	0.565495	0.559105	0.536741	0.603834	0.530351	0.584665	0.667732	0.536741	0.600639	0.613419	0.56869	0.642173	0.56869	0.594249	0.527157	0.421725	0.527157	0.527157	0.412141	0.587859	0.392971	0.552716	0.578275	0.376997	0.402556	0.450479	0.57508	0.396166	0.41853	0.412141	0.42492	0.658147	0.607029	0.482428	0.495208	0.693291	0.632588	0.463259	0.488818	0.674121	0.629393	0.693291	0.651757	0.501597	0.677316	0.693291	0.539936
B*27:24	0.507987	0.523962	0.511182	0.507987	0.523962	0.549521	0.476038	0.571885	0.613419	0.58147	0.546326	0.559105	0.555911	0.587859	0.514377	0.539936	0.472843	0.511182	0.472843	0.472843	0.43131	0.533546	0.42492	0.498403	0.523962	0.396166	0.434505	0.469649	0.520767	0.472843	0.450479	0.444089	0.456869	0.591054	0.539936	0.501597	0.527157	0.626198	0.607029	0.482428	0.549521	0.607029	0.5623	0.626198	0.584665	0.520767	0.610224	0.638978	0.559105
B*27:25	0.632588	0.648562	0.664537	0.629393	0.642173	0.616613	0.600639	0.690096	0.738019	0.642173	0.670927	0.683706	0.674121	0.645367	0.638978	0.664537	0.645367	0.495208	0.597444	0.597444	0.552716	0.658147	0.56869	0.670927	0.648562	0.565495	0.559105	0.591054	0.645367	0.527157	0.57508	0.56869	0.58147	0.71246	0.661342	0.623003	0.651757	0.744409	0.722045	0.623003	0.664537	0.728435	0.654952	0.747604	0.70607	0.642173	0.731629	0.70607	0.680511
B*27:26	0.543131	0.584665	0.546326	0.523962	0.552716	0.527157	0.511182	0.600639	0.648562	0.552716	0.58147	0.619808	0.584665	0.623003	0.549521	0.57508	0.507987	0.319489	0.507987	0.677316	0.376997	0.56869	0.373802	0.482428	0.533546	0.341853	0.383387	0.415335	0.555911	0.351438	0.399361	0.392971	0.405751	0.597444	0.722045	0.421725	0.450479	0.629393	0.607029	0.402556	0.463259	0.613419	0.619808	0.632588	0.616613	0.472843	0.616613	0.591054	0.479233
B*27:27	0.578275	0.594249	0.58147	0.5623	0.587859	0.619808	0.546326	0.635783	0.683706	0.645367	0.616613	0.629393	0.619808	0.658147	0.584665	0.610224	0.543131	0.495208	0.543131	0.520767	0.415335	0.603834	0.408946	0.517572	0.56869	0.380192	0.41853	0.453674	0.591054	0.456869	0.434505	0.428115	0.440895	0.610224	0.536741	0.434505	0.460064	0.642173	0.619808	0.415335	0.476038	0.626198	0.632588	0.645367	0.603834	0.453674	0.629393	0.658147	0.492013
B*27:36	0.642173	0.658147	0.645367	0.638978	0.651757	0.626198	0.610224	0.699681	0.747604	0.651757	0.680511	0.693291	0.683706	0.722045	0.648562	0.674121	0.607029	0.434505	0.674121	0.607029	0.507987	0.667732	0.488818	0.58147	0.632588	0.456869	0.504792	0.530351	0.654952	0.466454	0.514377	0.507987	0.520767	0.709265	0.658147	0.549521	0.578275	0.741214	0.71885	0.530351	0.591054	0.72524	0.731629	0.744409	0.702875	0.56869	0.728435	0.702875	0.607029
B*27:42	0.578275	0.594249	0.58147	0.559105	0.587859	0.5623	0.546326	0.635783	0.683706	0.587859	0.616613	0.629393	0.619808	0.658147	0.584665	0.610224	0.543131	0.354633	0.543131	0.690096	0.412141	0.603834	0.408946	0.517572	0.56869	0.376997	0.41853	0.450479	0.591054	0.386581	0.434505	0.428115	0.440895	0.607029	0.709265	0.43131	0.460064	0.638978	0.616613	0.412141	0.472843	0.623003	0.629393	0.642173	0.626198	0.482428	0.626198	0.600639	0.488818
B*27:43	0.565495	0.58147	0.56869	0.549521	0.58147	0.607029	0.533546	0.629393	0.670927	0.638978	0.603834	0.616613	0.613419	0.645367	0.571885	0.597444	0.530351	0.482428	0.530351	0.507987	0.402556	0.591054	0.396166	0.504792	0.555911	0.367412	0.405751	0.440895	0.578275	0.444089	0.421725	0.415335	0.428115	0.597444	0.523962	0.421725	0.447284	0.632588	0.613419	0.402556	0.469649	0.613419	0.619808	0.632588	0.591054	0.440895	0.616613	0.645367	0.479233
B*27:46	0.616613	0.632588	0.619808	0.597444	0.626198	0.658147	0.584665	0.674121	0.722045	0.626198	0.654952	0.667732	0.658147	0.696486	0.623003	0.648562	0.58147	0.476038	0.58147	0.559105	0.450479	0.642173	0.447284	0.555911	0.607029	0.415335	0.456869	0.488818	0.629393	0.434505	0.472843	0.466454	0.479233	0.645367	0.571885	0.469649	0.498403	0.677316	0.654952	0.450479	0.511182	0.661342	0.667732	0.680511	0.638978	0.488818	0.664537	0.696486	0.527157
B*27:49	0.667732	0.683706	0.670927	0.648562	0.677316	0.651757	0.635783	0.72524	0.773163	0.677316	0.70607	0.71885	0.709265	0.747604	0.674121	0.699681	0.632588	0.444089	0.632588	0.626198	0.501597	0.693291	0.498403	0.607029	0.658147	0.466454	0.507987	0.539936	0.680511	0.476038	0.523962	0.517572	0.530351	0.696486	0.638978	0.520767	0.549521	0.728435	0.70607	0.501597	0.5623	0.71246	0.71885	0.731629	0.686901	0.539936	0.715655	0.690096	0.578275
B*27:53	0.702875	0.71885	0.70607	0.683706	0.71246	0.686901	0.670927	0.760383	0.808307	0.71246	0.741214	0.753994	0.744409	0.782748	0.709265	0.734824	0.667732	0.479233	0.667732	0.565495	0.536741	0.728435	0.533546	0.642173	0.693291	0.501597	0.543131	0.57508	0.715655	0.511182	0.559105	0.552716	0.565495	0.731629	0.613419	0.555911	0.584665	0.763578	0.741214	0.536741	0.597444	0.747604	0.753994	0.766773	0.72524	0.57508	0.750799	0.72524	0.613419
B*27:54	0.670927	0.686901	0.674121	0.651757	0.680511	0.654952	0.638978	0.728435	0.776358	0.680511	0.709265	0.722045	0.71246	0.750799	0.677316	0.702875	0.635783	0.447284	0.635783	0.613419	0.504792	0.696486	0.501597	0.661342	0.686901	0.469649	0.511182	0.543131	0.683706	0.479233	0.527157	0.520767	0.533546	0.750799	0.677316	0.57508	0.603834	0.782748	0.760383	0.555911	0.616613	0.766773	0.722045	0.785942	0.744409	0.594249	0.769968	0.744409	0.632588
B*27:78	0.658147	0.674121	0.661342	0.638978	0.667732	0.632588	0.626198	0.715655	0.763578	0.667732	0.696486	0.709265	0.699681	0.738019	0.664537	0.690096	0.623003	0.460064	0.623003	0.600639	0.492013	0.683706	0.488818	0.597444	0.648562	0.456869	0.498403	0.530351	0.670927	0.460064	0.514377	0.507987	0.520767	0.686901	0.613419	0.511182	0.539936	0.71885	0.696486	0.492013	0.552716	0.702875	0.709265	0.722045	0.680511	0.530351	0.70607	0.670927	0.56869
B*27:79	0.651757	0.667732	0.654952	0.632588	0.661342	0.635783	0.619808	0.709265	0.757188	0.661342	0.690096	0.702875	0.693291	0.731629	0.658147	0.683706	0.616613	0.428115	0.616613	0.616613	0.485623	0.677316	0.482428	0.642173	0.667732	0.450479	0.492013	0.523962	0.664537	0.460064	0.507987	0.501597	0.514377	0.731629	0.680511	0.555911	0.584665	0.763578	0.741214	0.536741	0.597444	0.747604	0.702875	0.766773	0.72524	0.57508	0.750799	0.72524	0.613419
B*35:01	0.645367	0.600639	0.648562	0.642173	0.619808	0.619808	0.680511	0.565495	0.747604	0.610224	0.683706	0.552716	0.584665	0.658147	0.651757	0.677316	0.610224	0.504792	0.610224	0.779553	0.495208	0.670927	0.447284	0.584665	0.635783	0.460064	0.485623	0.533546	0.619808	0.520767	0.492013	0.495208	0.507987	0.559105	0.683706	0.440895	0.396166	0.591054	0.533546	0.364217	0.389776	0.57508	0.58147	0.511182	0.578275	0.434505	0.578275	0.527157	0.440895
B*35:02	0.629393	0.584665	0.632588	0.613419	0.603834	0.670927	0.664537	0.549521	0.731629	0.594249	0.667732	0.536741	0.56869	0.642173	0.635783	0.661342	0.594249	0.546326	0.594249	0.763578	0.466454	0.654952	0.43131	0.56869	0.619808	0.43131	0.469649	0.504792	0.603834	0.507987	0.476038	0.479233	0.492013	0.530351	0.654952	0.412141	0.380192	0.5623	0.504792	0.335463	0.361022	0.546326	0.552716	0.482428	0.549521	0.405751	0.549521	0.578275	0.412141
B*35:03	0.619808	0.57508	0.623003	0.616613	0.594249	0.645367	0.654952	0.539936	0.722045	0.584665	0.658147	0.527157	0.559105	0.632588	0.626198	0.651757	0.584665	0.527157	0.584665	0.753994	0.469649	0.645367	0.421725	0.559105	0.610224	0.434505	0.460064	0.507987	0.594249	0.482428	0.466454	0.469649	0.482428	0.533546	0.658147	0.415335	0.370607	0.565495	0.507987	0.338658	0.364217	0.549521	0.555911	0.485623	0.552716	0.408946	0.552716	0.552716	0.415335
B*35:04	0.610224	0.565495	0.613419	0.594249	0.584665	0.651757	0.645367	0.530351	0.71246	0.57508	0.648562	0.517572	0.549521	0.623003	0.616613	0.642173	0.57508	0.527157	0.57508	0.744409	0.447284	0.635783	0.412141	0.549521	0.600639	0.412141	0.450479	0.485623	0.584665	0.488818	0.456869	0.460064	0.472843	0.511182	0.635783	0.392971	0.361022	0.543131	0.485623	0.316294	0.341853	0.527157	0.533546	0.463259	0.530351	0.386581	0.530351	0.559105	0.392971
B*35:05	0.597444	0.552716	0.600639	0.594249	0.613419	0.571885	0.632588	0.626198	0.699681	0.670927	0.635783	0.504792	0.645367	0.610224	0.603834	0.629393	0.5623	0.456869	0.5623	0.731629	0.447284	0.623003	0.399361	0.536741	0.587859	0.412141	0.4377	0.485623	0.571885	0.472843	0.444089	0.447284	0.460064	0.511182	0.635783	0.392971	0.348243	0.546326	0.527157	0.316294	0.383387	0.527157	0.533546	0.463259	0.530351	0.386581	0.530351	0.479233	0.392971
B*35:06	0.626198	0.58147	0.629393	0.610224	0.600639	0.651757	0.661342	0.546326	0.728435	0.591054	0.664537	0.533546	0.565495	0.638978	0.632588	0.658147	0.591054	0.533546	0.591054	0.760383	0.463259	0.651757	0.428115	0.565495	0.616613	0.428115	0.466454	0.501597	0.600639	0.476038	0.472843	0.476038	0.488818	0.527157	0.651757	0.408946	0.376997	0.559105	0.501597	0.332268	0.357827	0.543131	0.549521	0.479233	0.546326	0.402556	0.546326	0.559105	0.408946
B*35:08	0.607029	0.5623	0.642173	0.603834	0.58147	0.58147	0.642173	0.527157	0.709265	0.571885	0.645367	0.514377	0.546326	0.619808	0.613419	0.638978	0.645367	0.466454	0.571885	0.741214	0.456869	0.632588	0.482428	0.619808	0.597444	0.495208	0.447284	0.495208	0.58147	0.482428	0.453674	0.456869	0.469649	0.552716	0.677316	0.434505	0.389776	0.584665	0.527157	0.399361	0.383387	0.56869	0.543131	0.504792	0.571885	0.428115	0.571885	0.520767	0.434505
B*35:09	0.584665	0.539936	0.587859	0.56869	0.559105	0.626198	0.619808	0.504792	0.686901	0.549521	0.623003	0.492013	0.523962	0.597444	0.591054	0.616613	0.549521	0.501597	0.549521	0.71885	0.421725	0.610224	0.386581	0.523962	0.57508	0.386581	0.42492	0.460064	0.559105	0.463259	0.43131	0.434505	0.447284	0.485623	0.610224	0.367412	0.335463	0.517572	0.460064	0.290735	0.316294	0.501597	0.507987	0.4377	0.504792	0.361022	0.504792	0.533546	0.367412
B*35:10	0.658147	0.613419	0.661342	0.654952	0.632588	0.632588	0.693291	0.578275	0.734824	0.623003	0.696486	0.565495	0.597444	0.670927	0.664537	0.690096	0.623003	0.517572	0.623003	0.792332	0.507987	0.683706	0.460064	0.597444	0.648562	0.472843	0.498403	0.546326	0.632588	0.533546	0.504792	0.507987	0.520767	0.571885	0.696486	0.453674	0.408946	0.603834	0.546326	0.376997	0.402556	0.587859	0.594249	0.523962	0.591054	0.447284	0.591054	0.539936	0.453674
B*35:11	0.619808	0.57508	0.623003	0.616613	0.594249	0.594249	0.654952	0.539936	0.722045	0.584665	0.658147	0.527157	0.559105	0.632588	0.626198	0.651757	0.584665	0.479233	0.584665	0.753994	0.469649	0.645367	0.421725	0.610224	0.635783	0.434505	0.460064	0.507987	0.594249	0.495208	0.466454	0.469649	0.482428	0.584665	0.709265	0.466454	0.421725	0.616613	0.559105	0.389776	0.415335	0.600639	0.555911	0.536741	0.603834	0.460064	0.603834	0.552716	0.466454
B*35:12	0.594249	0.549521	0.597444	0.578275	0.56869	0.635783	0.629393	0.549521	0.696486	0.559105	0.632588	0.501597	0.533546	0.607029	0.600639	0.626198	0.559105	0.511182	0.559105	0.728435	0.43131	0.619808	0.396166	0.533546	0.584665	0.396166	0.434505	0.469649	0.56869	0.472843	0.440895	0.444089	0.456869	0.495208	0.619808	0.376997	0.345048	0.527157	0.469649	0.300319	0.325879	0.511182	0.517572	0.447284	0.514377	0.370607	0.514377	0.543131	0.376997
B*35:13	0.632588	0.587859	0.635783	0.629393	0.607029	0.658147	0.667732	0.552716	0.709265	0.597444	0.670927	0.539936	0.571885	0.645367	0.638978	0.664537	0.597444	0.539936	0.597444	0.766773	0.482428	0.658147	0.434505	0.571885	0.623003	0.447284	0.472843	0.520767	0.607029	0.495208	0.479233	0.482428	0.495208	0.546326	0.670927	0.428115	0.383387	0.578275	0.520767	0.351438	0.376997	0.5623	0.56869	0.498403	0.565495	0.421725	0.565495	0.565495	0.428115
B*35:14	0.600639	0.555911	0.632588	0.597444	0.57508	0.57508	0.635783	0.520767	0.702875	0.565495	0.638978	0.507987	0.539936	0.613419	0.607029	0.632588	0.613419	0.460064	0.565495	0.734824	0.450479	0.626198	0.450479	0.638978	0.616613	0.463259	0.440895	0.488818	0.57508	0.476038	0.447284	0.450479	0.463259	0.594249	0.71885	0.476038	0.43131	0.626198	0.56869	0.41853	0.42492	0.610224	0.536741	0.546326	0.613419	0.469649	0.613419	0.5623	0.476038
B*35:15	0.613419	0.56869	0.616613	0.610224	0.587859	0.587859	0.648562	0.533546	0.715655	0.578275	0.651757	0.520767	0.552716	0.693291	0.619808	0.645367	0.578275	0.472843	0.578275	0.747604	0.463259	0.638978	0.444089	0.552716	0.603834	0.428115	0.453674	0.501597	0.587859	0.488818	0.460064	0.463259	0.476038	0.555911	0.680511	0.4377	0.392971	0.587859	0.530351	0.361022	0.386581	0.571885	0.578275	0.507987	0.57508	0.43131	0.57508	0.523962	0.4377
B*35:16	0.626198	0.58147	0.629393	0.623003	0.642173	0.600639	0.661342	0.623003	0.702875	0.632588	0.664537	0.533546	0.607029	0.638978	0.632588	0.658147	0.591054	0.485623	0.591054	0.760383	0.476038	0.651757	0.428115	0.565495	0.616613	0.440895	0.466454	0.514377	0.600639	0.501597	0.472843	0.476038	0.488818	0.539936	0.664537	0.421725	0.376997	0.571885	0.555911	0.345048	0.412141	0.555911	0.5623	0.492013	0.559105	0.415335	0.559105	0.507987	0.421725
B*35:17	0.613419	0.56869	0.616613	0.610224	0.629393	0.587859	0.648562	0.610224	0.715655	0.619808	0.651757	0.520767	0.594249	0.626198	0.619808	0.645367	0.578275	0.472843	0.578275	0.747604	0.463259	0.638978	0.415335	0.552716	0.603834	0.428115	0.453674	0.501597	0.587859	0.488818	0.460064	0.463259	0.476038	0.527157	0.651757	0.408946	0.364217	0.559105	0.543131	0.332268	0.399361	0.543131	0.549521	0.479233	0.546326	0.402556	0.546326	0.495208	0.408946
B*35:19	0.642173	0.597444	0.645367	0.638978	0.616613	0.616613	0.677316	0.5623	0.750799	0.607029	0.680511	0.549521	0.58147	0.654952	0.648562	0.674121	0.607029	0.501597	0.607029	0.776358	0.492013	0.667732	0.444089	0.58147	0.632588	0.456869	0.482428	0.530351	0.616613	0.517572	0.488818	0.492013	0.504792	0.555911	0.680511	0.4377	0.392971	0.587859	0.530351	0.361022	0.386581	0.571885	0.578275	0.507987	0.57508	0.43131	0.57508	0.523962	0.4377
B*35:20	0.670927	0.626198	0.674121	0.667732	0.645367	0.645367	0.661342	0.591054	0.773163	0.635783	0.709265	0.578275	0.610224	0.683706	0.677316	0.702875	0.635783	0.530351	0.635783	0.805112	0.520767	0.696486	0.472843	0.610224	0.661342	0.485623	0.511182	0.559105	0.645367	0.546326	0.517572	0.520767	0.533546	0.597444	0.722045	0.415335	0.434505	0.629393	0.571885	0.402556	0.428115	0.613419	0.619808	0.549521	0.616613	0.472843	0.616613	0.565495	0.479233
B*35:21	0.651757	0.607029	0.654952	0.648562	0.626198	0.626198	0.686901	0.571885	0.753994	0.616613	0.690096	0.559105	0.591054	0.664537	0.658147	0.683706	0.616613	0.511182	0.616613	0.785942	0.501597	0.677316	0.453674	0.642173	0.667732	0.466454	0.492013	0.539936	0.626198	0.527157	0.498403	0.501597	0.514377	0.616613	0.741214	0.498403	0.453674	0.648562	0.591054	0.421725	0.447284	0.632588	0.587859	0.56869	0.635783	0.492013	0.635783	0.584665	0.498403
B*35:22	0.546326	0.501597	0.549521	0.530351	0.5623	0.587859	0.58147	0.610224	0.648562	0.619808	0.584665	0.453674	0.594249	0.559105	0.552716	0.578275	0.511182	0.463259	0.511182	0.680511	0.383387	0.571885	0.348243	0.485623	0.536741	0.348243	0.386581	0.421725	0.520767	0.42492	0.392971	0.396166	0.408946	0.447284	0.571885	0.329073	0.297125	0.482428	0.463259	0.252396	0.319489	0.463259	0.469649	0.399361	0.466454	0.322684	0.466454	0.495208	0.329073
B*35:23	0.661342	0.616613	0.664537	0.658147	0.635783	0.635783	0.696486	0.58147	0.763578	0.626198	0.699681	0.56869	0.600639	0.674121	0.667732	0.693291	0.626198	0.520767	0.626198	0.795527	0.511182	0.686901	0.463259	0.600639	0.651757	0.476038	0.501597	0.549521	0.635783	0.536741	0.507987	0.511182	0.523962	0.57508	0.699681	0.456869	0.412141	0.607029	0.549521	0.380192	0.405751	0.591054	0.597444	0.527157	0.594249	0.450479	0.594249	0.543131	0.456869
B*35:24	0.677316	0.632588	0.680511	0.674121	0.651757	0.651757	0.71246	0.597444	0.779553	0.642173	0.715655	0.584665	0.616613	0.690096	0.683706	0.709265	0.642173	0.536741	0.642173	0.811502	0.527157	0.702875	0.479233	0.616613	0.667732	0.492013	0.517572	0.565495	0.651757	0.552716	0.523962	0.527157	0.539936	0.591054	0.715655	0.472843	0.428115	0.623003	0.565495	0.396166	0.421725	0.607029	0.613419	0.543131	0.610224	0.466454	0.610224	0.559105	0.472843
B*35:25	0.613419	0.56869	0.616613	0.610224	0.587859	0.587859	0.648562	0.533546	0.734824	0.578275	0.651757	0.520767	0.552716	0.626198	0.619808	0.645367	0.578275	0.472843	0.578275	0.747604	0.463259	0.638978	0.415335	0.552716	0.603834	0.428115	0.453674	0.501597	0.587859	0.488818	0.460064	0.463259	0.476038	0.527157	0.651757	0.408946	0.364217	0.559105	0.501597	0.332268	0.357827	0.543131	0.549521	0.479233	0.546326	0.402556	0.546326	0.495208	0.408946
B*35:26	0.638978	0.594249	0.642173	0.635783	0.613419	0.613419	0.607029	0.559105	0.760383	0.603834	0.677316	0.546326	0.578275	0.651757	0.645367	0.670927	0.603834	0.498403	0.603834	0.773163	0.488818	0.664537	0.440895	0.578275	0.629393	0.453674	0.479233	0.527157	0.613419	0.514377	0.485623	0.488818	0.501597	0.584665	0.709265	0.408946	0.421725	0.616613	0.559105	0.389776	0.415335	0.600639	0.607029	0.536741	0.603834	0.460064	0.603834	0.552716	0.466454
B*35:27	0.654952	0.610224	0.658147	0.651757	0.629393	0.629393	0.690096	0.57508	0.757188	0.619808	0.693291	0.5623	0.594249	0.667732	0.661342	0.686901	0.619808	0.514377	0.619808	0.766773	0.504792	0.680511	0.456869	0.594249	0.645367	0.469649	0.495208	0.543131	0.629393	0.530351	0.501597	0.504792	0.517572	0.56869	0.670927	0.450479	0.405751	0.600639	0.543131	0.373802	0.399361	0.584665	0.591054	0.520767	0.587859	0.444089	0.587859	0.536741	0.450479
B*35:28	0.683706	0.638978	0.686901	0.680511	0.658147	0.658147	0.674121	0.603834	0.760383	0.648562	0.722045	0.591054	0.623003	0.696486	0.690096	0.715655	0.648562	0.543131	0.648562	0.817891	0.533546	0.709265	0.485623	0.623003	0.674121	0.498403	0.523962	0.571885	0.658147	0.559105	0.530351	0.533546	0.546326	0.610224	0.734824	0.428115	0.447284	0.642173	0.584665	0.415335	0.440895	0.626198	0.632588	0.5623	0.629393	0.485623	0.629393	0.578275	0.492013
B*35:29	0.610224	0.565495	0.613419	0.607029	0.584665	0.584665	0.645367	0.530351	0.71246	0.57508	0.648562	0.600639	0.549521	0.623003	0.616613	0.642173	0.57508	0.469649	0.57508	0.744409	0.460064	0.635783	0.412141	0.549521	0.600639	0.42492	0.450479	0.498403	0.584665	0.485623	0.456869	0.460064	0.472843	0.523962	0.648562	0.405751	0.361022	0.555911	0.498403	0.329073	0.354633	0.539936	0.546326	0.559105	0.543131	0.399361	0.543131	0.492013	0.405751
B*35:30	0.629393	0.584665	0.632588	0.626198	0.645367	0.603834	0.664537	0.591054	0.731629	0.635783	0.667732	0.536741	0.610224	0.642173	0.635783	0.661342	0.594249	0.488818	0.594249	0.763578	0.479233	0.654952	0.43131	0.56869	0.619808	0.444089	0.469649	0.517572	0.603834	0.504792	0.476038	0.479233	0.492013	0.543131	0.667732	0.42492	0.380192	0.57508	0.559105	0.348243	0.415335	0.559105	0.565495	0.495208	0.5623	0.41853	0.5623	0.511182	0.42492
B*35:31	0.43131	0.386581	0.434505	0.43131	0.447284	0.472843	0.466454	0.495208	0.533546	0.504792	0.469649	0.338658	0.479233	0.511182	0.4377	0.463259	0.396166	0.434505	0.396166	0.565495	0.354633	0.456869	0.348243	0.370607	0.421725	0.319489	0.357827	0.392971	0.405751	0.396166	0.364217	0.367412	0.380192	0.361022	0.485623	0.329073	0.297125	0.396166	0.376997	0.252396	0.319489	0.376997	0.383387	0.313099	0.380192	0.322684	0.380192	0.408946	0.329073
B*35:32	0.56869	0.523962	0.571885	0.565495	0.543131	0.543131	0.603834	0.591054	0.670927	0.600639	0.607029	0.476038	0.57508	0.58147	0.57508	0.600639	0.533546	0.428115	0.533546	0.702875	0.41853	0.594249	0.370607	0.507987	0.559105	0.383387	0.408946	0.456869	0.543131	0.444089	0.415335	0.41853	0.43131	0.482428	0.607029	0.364217	0.319489	0.517572	0.456869	0.28754	0.313099	0.498403	0.504792	0.434505	0.501597	0.357827	0.501597	0.450479	0.364217
B*35:34	0.603834	0.559105	0.607029	0.600639	0.578275	0.645367	0.638978	0.523962	0.70607	0.56869	0.642173	0.511182	0.543131	0.616613	0.610224	0.635783	0.56869	0.520767	0.56869	0.738019	0.453674	0.629393	0.405751	0.543131	0.594249	0.41853	0.444089	0.492013	0.578275	0.495208	0.450479	0.453674	0.466454	0.517572	0.642173	0.399361	0.354633	0.549521	0.492013	0.322684	0.348243	0.533546	0.539936	0.469649	0.536741	0.392971	0.536741	0.552716	0.399361
B*35:37	0.613419	0.56869	0.616613	0.610224	0.629393	0.587859	0.648562	0.638978	0.715655	0.683706	0.651757	0.520767	0.658147	0.626198	0.619808	0.645367	0.578275	0.472843	0.578275	0.747604	0.463259	0.638978	0.415335	0.552716	0.603834	0.428115	0.453674	0.501597	0.587859	0.488818	0.460064	0.463259	0.476038	0.527157	0.651757	0.408946	0.364217	0.469649	0.543131	0.332268	0.399361	0.543131	0.549521	0.479233	0.546326	0.402556	0.546326	0.495208	0.408946
B*35:38	0.616613	0.571885	0.587859	0.613419	0.591054	0.642173	0.651757	0.536741	0.71885	0.58147	0.654952	0.523962	0.555911	0.629393	0.623003	0.648562	0.623003	0.523962	0.58147	0.750799	0.466454	0.642173	0.460064	0.597444	0.607029	0.472843	0.456869	0.504792	0.591054	0.479233	0.463259	0.466454	0.479233	0.498403	0.623003	0.380192	0.335463	0.530351	0.472843	0.376997	0.329073	0.514377	0.552716	0.450479	0.517572	0.373802	0.517572	0.517572	0.380192
B*35:41	0.677316	0.632588	0.680511	0.674121	0.651757	0.651757	0.71246	0.597444	0.779553	0.642173	0.715655	0.584665	0.616613	0.690096	0.683706	0.709265	0.642173	0.536741	0.642173	0.811502	0.527157	0.702875	0.479233	0.616613	0.667732	0.492013	0.517572	0.565495	0.651757	0.552716	0.523962	0.527157	0.539936	0.591054	0.715655	0.472843	0.428115	0.623003	0.565495	0.396166	0.421725	0.607029	0.613419	0.543131	0.610224	0.466454	0.610224	0.559105	0.472843
B*35:43	0.543131	0.498403	0.57508	0.539936	0.517572	0.517572	0.578275	0.565495	0.645367	0.57508	0.58147	0.450479	0.549521	0.555911	0.549521	0.57508	0.555911	0.402556	0.507987	0.677316	0.392971	0.56869	0.392971	0.58147	0.559105	0.405751	0.383387	0.43131	0.517572	0.41853	0.389776	0.392971	0.405751	0.536741	0.661342	0.41853	0.373802	0.571885	0.511182	0.361022	0.367412	0.552716	0.479233	0.488818	0.555911	0.412141	0.555911	0.504792	0.41853
B*35:44	0.507987	0.463259	0.539936	0.492013	0.482428	0.549521	0.543131	0.530351	0.610224	0.539936	0.546326	0.415335	0.514377	0.520767	0.514377	0.539936	0.520767	0.42492	0.472843	0.642173	0.345048	0.533546	0.357827	0.546326	0.523962	0.357827	0.348243	0.383387	0.482428	0.386581	0.354633	0.357827	0.370607	0.488818	0.613419	0.370607	0.338658	0.523962	0.463259	0.313099	0.319489	0.504792	0.43131	0.440895	0.507987	0.364217	0.507987	0.536741	0.370607
B*35:47	0.651757	0.607029	0.654952	0.648562	0.626198	0.626198	0.686901	0.571885	0.760383	0.616613	0.690096	0.559105	0.591054	0.664537	0.658147	0.683706	0.616613	0.511182	0.616613	0.785942	0.501597	0.677316	0.453674	0.591054	0.642173	0.466454	0.492013	0.539936	0.626198	0.527157	0.498403	0.501597	0.514377	0.565495	0.690096	0.447284	0.402556	0.597444	0.539936	0.370607	0.396166	0.58147	0.587859	0.517572	0.584665	0.440895	0.584665	0.533546	0.447284
B*35:48	0.686901	0.642173	0.690096	0.683706	0.661342	0.661342	0.722045	0.607029	0.789137	0.651757	0.72524	0.594249	0.626198	0.699681	0.693291	0.71885	0.651757	0.546326	0.651757	0.821086	0.536741	0.71246	0.488818	0.626198	0.677316	0.501597	0.527157	0.57508	0.661342	0.5623	0.533546	0.536741	0.549521	0.600639	0.72524	0.482428	0.4377	0.632588	0.57508	0.405751	0.43131	0.616613	0.623003	0.552716	0.619808	0.476038	0.619808	0.56869	0.482428
B*35:49	0.623003	0.578275	0.626198	0.619808	0.597444	0.597444	0.658147	0.543131	0.744409	0.587859	0.661342	0.530351	0.5623	0.635783	0.629393	0.654952	0.587859	0.482428	0.587859	0.757188	0.472843	0.648562	0.42492	0.5623	0.613419	0.4377	0.463259	0.511182	0.597444	0.498403	0.469649	0.472843	0.485623	0.536741	0.661342	0.41853	0.373802	0.56869	0.511182	0.341853	0.367412	0.552716	0.559105	0.488818	0.555911	0.412141	0.555911	0.504792	0.41853
B*35:51	0.5623	0.517572	0.565495	0.559105	0.578275	0.536741	0.597444	0.626198	0.664537	0.635783	0.600639	0.469649	0.610224	0.57508	0.56869	0.594249	0.527157	0.421725	0.527157	0.696486	0.412141	0.587859	0.364217	0.501597	0.552716	0.376997	0.402556	0.450479	0.536741	0.4377	0.408946	0.412141	0.42492	0.476038	0.600639	0.357827	0.313099	0.511182	0.492013	0.28115	0.348243	0.492013	0.498403	0.428115	0.495208	0.351438	0.495208	0.444089	0.357827
B*35:52	0.642173	0.597444	0.645367	0.638978	0.616613	0.616613	0.677316	0.5623	0.744409	0.607029	0.680511	0.549521	0.58147	0.654952	0.648562	0.674121	0.607029	0.501597	0.607029	0.779553	0.492013	0.667732	0.444089	0.58147	0.632588	0.456869	0.482428	0.530351	0.616613	0.517572	0.488818	0.492013	0.504792	0.555911	0.683706	0.4377	0.392971	0.587859	0.530351	0.361022	0.386581	0.571885	0.578275	0.507987	0.57508	0.43131	0.57508	0.523962	0.4377
B*35:58	0.543131	0.498403	0.546326	0.539936	0.559105	0.517572	0.578275	0.571885	0.645367	0.616613	0.58147	0.450479	0.591054	0.555911	0.549521	0.57508	0.507987	0.402556	0.507987	0.677316	0.392971	0.56869	0.345048	0.533546	0.559105	0.357827	0.383387	0.43131	0.517572	0.41853	0.389776	0.392971	0.405751	0.507987	0.632588	0.389776	0.345048	0.543131	0.523962	0.313099	0.380192	0.523962	0.479233	0.460064	0.527157	0.383387	0.527157	0.476038	0.389776
B*35:59	0.58147	0.536741	0.584665	0.565495	0.555911	0.607029	0.616613	0.536741	0.683706	0.546326	0.619808	0.488818	0.520767	0.594249	0.587859	0.613419	0.546326	0.488818	0.546326	0.715655	0.41853	0.607029	0.383387	0.520767	0.571885	0.383387	0.421725	0.456869	0.555911	0.43131	0.428115	0.43131	0.444089	0.482428	0.607029	0.364217	0.332268	0.514377	0.456869	0.28754	0.313099	0.498403	0.504792	0.434505	0.501597	0.357827	0.501597	0.514377	0.364217
B*35:66	0.466454	0.421725	0.501597	0.463259	0.482428	0.440895	0.501597	0.495208	0.56869	0.539936	0.504792	0.373802	0.514377	0.546326	0.472843	0.498403	0.504792	0.325879	0.498403	0.600639	0.332268	0.492013	0.370607	0.479233	0.456869	0.354633	0.313099	0.354633	0.440895	0.341853	0.313099	0.316294	0.329073	0.479233	0.603834	0.361022	0.316294	0.514377	0.495208	0.325879	0.351438	0.495208	0.469649	0.43131	0.498403	0.354633	0.498403	0.447284	0.361022
B*35:68	0.584665	0.539936	0.587859	0.58147	0.559105	0.559105	0.619808	0.571885	0.686901	0.616613	0.623003	0.492013	0.591054	0.597444	0.591054	0.616613	0.549521	0.444089	0.549521	0.71885	0.434505	0.610224	0.386581	0.523962	0.57508	0.399361	0.42492	0.472843	0.559105	0.460064	0.43131	0.434505	0.447284	0.498403	0.623003	0.380192	0.335463	0.533546	0.472843	0.303514	0.329073	0.514377	0.520767	0.450479	0.517572	0.373802	0.517572	0.466454	0.380192
B*35:72	0.594249	0.549521	0.597444	0.591054	0.610224	0.56869	0.584665	0.623003	0.696486	0.667732	0.632588	0.501597	0.642173	0.607029	0.600639	0.626198	0.559105	0.453674	0.559105	0.728435	0.444089	0.619808	0.396166	0.533546	0.584665	0.408946	0.434505	0.482428	0.56869	0.469649	0.440895	0.444089	0.456869	0.520767	0.645367	0.338658	0.357827	0.555911	0.536741	0.325879	0.392971	0.536741	0.543131	0.472843	0.539936	0.396166	0.539936	0.488818	0.402556
B*35:74	0.616613	0.571885	0.619808	0.613419	0.591054	0.642173	0.651757	0.536741	0.667732	0.58147	0.603834	0.523962	0.555911	0.629393	0.623003	0.648562	0.58147	0.523962	0.58147	0.750799	0.466454	0.642173	0.41853	0.555911	0.607029	0.43131	0.456869	0.504792	0.591054	0.479233	0.463259	0.466454	0.479233	0.530351	0.654952	0.412141	0.367412	0.5623	0.504792	0.335463	0.361022	0.546326	0.552716	0.482428	0.549521	0.405751	0.549521	0.549521	0.412141
B*35:75	0.57508	0.530351	0.578275	0.571885	0.549521	0.600639	0.610224	0.527157	0.677316	0.571885	0.613419	0.482428	0.546326	0.587859	0.58147	0.607029	0.539936	0.482428	0.539936	0.709265	0.42492	0.600639	0.376997	0.514377	0.565495	0.389776	0.415335	0.463259	0.549521	0.4377	0.421725	0.42492	0.4377	0.488818	0.613419	0.370607	0.325879	0.523962	0.463259	0.29393	0.319489	0.504792	0.511182	0.440895	0.507987	0.364217	0.507987	0.507987	0.370607
B*35:78	0.635783	0.613419	0.638978	0.632588	0.610224	0.610224	0.670927	0.555911	0.747604	0.600639	0.674121	0.565495	0.57508	0.648562	0.642173	0.667732	0.600639	0.495208	0.600639	0.769968	0.485623	0.661342	0.4377	0.57508	0.626198	0.450479	0.476038	0.523962	0.610224	0.511182	0.492013	0.485623	0.498403	0.571885	0.696486	0.453674	0.408946	0.603834	0.546326	0.376997	0.402556	0.587859	0.594249	0.523962	0.591054	0.447284	0.591054	0.539936	0.453674
B*35:88	0.523962	0.479233	0.527157	0.507987	0.498403	0.565495	0.559105	0.444089	0.626198	0.488818	0.5623	0.43131	0.463259	0.603834	0.530351	0.555911	0.488818	0.440895	0.488818	0.658147	0.361022	0.549521	0.354633	0.463259	0.514377	0.325879	0.364217	0.399361	0.498403	0.402556	0.370607	0.373802	0.386581	0.453674	0.578275	0.335463	0.303514	0.485623	0.428115	0.258786	0.284345	0.469649	0.476038	0.405751	0.472843	0.329073	0.472843	0.501597	0.335463
B*35:92	0.638978	0.594249	0.642173	0.635783	0.613419	0.613419	0.674121	0.559105	0.71885	0.603834	0.654952	0.546326	0.578275	0.651757	0.645367	0.670927	0.603834	0.498403	0.603834	0.773163	0.488818	0.664537	0.440895	0.578275	0.629393	0.453674	0.479233	0.527157	0.613419	0.514377	0.485623	0.488818	0.501597	0.552716	0.677316	0.434505	0.389776	0.584665	0.527157	0.357827	0.361022	0.56869	0.57508	0.504792	0.571885	0.428115	0.571885	0.520767	0.434505
B*35:100	0.597444	0.552716	0.632588	0.594249	0.571885	0.571885	0.632588	0.517572	0.699681	0.5623	0.635783	0.504792	0.536741	0.610224	0.603834	0.629393	0.635783	0.456869	0.5623	0.731629	0.447284	0.623003	0.472843	0.610224	0.587859	0.485623	0.4377	0.485623	0.571885	0.472843	0.444089	0.447284	0.460064	0.543131	0.667732	0.42492	0.380192	0.57508	0.517572	0.389776	0.373802	0.559105	0.533546	0.495208	0.5623	0.41853	0.5623	0.511182	0.42492
B*35:101	0.648562	0.603834	0.651757	0.645367	0.623003	0.623003	0.683706	0.56869	0.750799	0.613419	0.686901	0.555911	0.587859	0.661342	0.654952	0.680511	0.613419	0.507987	0.613419	0.782748	0.498403	0.674121	0.450479	0.587859	0.638978	0.463259	0.488818	0.536741	0.623003	0.523962	0.495208	0.498403	0.511182	0.5623	0.686901	0.444089	0.399361	0.594249	0.536741	0.367412	0.392971	0.578275	0.584665	0.514377	0.58147	0.4377	0.58147	0.530351	0.444089
B*35:102	0.533546	0.488818	0.565495	0.530351	0.507987	0.507987	0.56869	0.555911	0.635783	0.565495	0.571885	0.440895	0.539936	0.546326	0.539936	0.565495	0.546326	0.392971	0.498403	0.667732	0.383387	0.559105	0.383387	0.571885	0.549521	0.396166	0.373802	0.421725	0.507987	0.408946	0.380192	0.383387	0.396166	0.527157	0.651757	0.408946	0.364217	0.5623	0.501597	0.351438	0.357827	0.543131	0.469649	0.479233	0.546326	0.402556	0.546326	0.495208	0.408946
B*35:103	0.680511	0.635783	0.683706	0.677316	0.654952	0.654952	0.715655	0.600639	0.782748	0.645367	0.71885	0.587859	0.619808	0.693291	0.686901	0.71246	0.645367	0.539936	0.645367	0.814696	0.530351	0.70607	0.482428	0.619808	0.670927	0.495208	0.520767	0.56869	0.654952	0.555911	0.527157	0.530351	0.543131	0.594249	0.71885	0.476038	0.43131	0.626198	0.56869	0.399361	0.42492	0.610224	0.616613	0.546326	0.613419	0.469649	0.613419	0.5623	0.476038
B*35:104	0.632588	0.587859	0.635783	0.629393	0.607029	0.607029	0.667732	0.552716	0.734824	0.597444	0.670927	0.539936	0.571885	0.645367	0.638978	0.664537	0.597444	0.492013	0.597444	0.766773	0.482428	0.658147	0.434505	0.571885	0.623003	0.447284	0.472843	0.520767	0.607029	0.507987	0.479233	0.482428	0.495208	0.546326	0.670927	0.428115	0.383387	0.578275	0.520767	0.351438	0.376997	0.5623	0.56869	0.498403	0.565495	0.421725	0.565495	0.514377	0.428115
B*35:105	0.600639	0.555911	0.635783	0.597444	0.57508	0.57508	0.635783	0.520767	0.702875	0.565495	0.638978	0.507987	0.539936	0.613419	0.607029	0.632588	0.638978	0.460064	0.565495	0.734824	0.450479	0.626198	0.476038	0.613419	0.591054	0.488818	0.440895	0.488818	0.57508	0.476038	0.447284	0.450479	0.463259	0.546326	0.670927	0.428115	0.383387	0.578275	0.520767	0.392971	0.376997	0.5623	0.536741	0.498403	0.565495	0.421725	0.565495	0.514377	0.428115
B*35:106	0.623003	0.578275	0.626198	0.619808	0.597444	0.648562	0.658147	0.543131	0.72524	0.587859	0.661342	0.530351	0.5623	0.635783	0.629393	0.654952	0.587859	0.530351	0.587859	0.757188	0.472843	0.648562	0.42492	0.5623	0.613419	0.4377	0.463259	0.511182	0.597444	0.485623	0.469649	0.472843	0.485623	0.536741	0.661342	0.41853	0.373802	0.56869	0.511182	0.341853	0.367412	0.552716	0.559105	0.488818	0.555911	0.412141	0.555911	0.555911	0.41853
B*35:107	0.642173	0.597444	0.645367	0.638978	0.616613	0.616613	0.677316	0.5623	0.744409	0.607029	0.680511	0.549521	0.58147	0.654952	0.648562	0.674121	0.607029	0.501597	0.607029	0.776358	0.492013	0.667732	0.444089	0.58147	0.632588	0.456869	0.482428	0.530351	0.616613	0.517572	0.488818	0.492013	0.504792	0.555911	0.680511	0.4377	0.392971	0.587859	0.530351	0.361022	0.386581	0.571885	0.578275	0.507987	0.57508	0.43131	0.57508	0.523962	0.4377
B*35:108	0.670927	0.626198	0.674121	0.667732	0.645367	0.645367	0.70607	0.591054	0.773163	0.635783	0.709265	0.578275	0.610224	0.683706	0.677316	0.702875	0.635783	0.530351	0.635783	0.805112	0.520767	0.696486	0.472843	0.610224	0.661342	0.485623	0.511182	0.559105	0.645367	0.546326	0.517572	0.520767	0.533546	0.584665	0.709265	0.466454	0.421725	0.616613	0.559105	0.389776	0.415335	0.600639	0.607029	0.536741	0.603834	0.460064	0.603834	0.552716	0.466454
B*35:109	0.623003	0.578275	0.626198	0.619808	0.597444	0.648562	0.658147	0.543131	0.72524	0.587859	0.661342	0.530351	0.5623	0.635783	0.629393	0.654952	0.587859	0.530351	0.587859	0.757188	0.472843	0.648562	0.42492	0.5623	0.613419	0.4377	0.463259	0.511182	0.597444	0.485623	0.469649	0.472843	0.485623	0.536741	0.661342	0.41853	0.373802	0.56869	0.511182	0.341853	0.367412	0.552716	0.559105	0.488818	0.555911	0.412141	0.555911	0.555911	0.41853
B*35:112	0.626198	0.58147	0.629393	0.623003	0.600639	0.600639	0.661342	0.546326	0.728435	0.591054	0.664537	0.533546	0.565495	0.638978	0.632588	0.658147	0.591054	0.485623	0.591054	0.760383	0.476038	0.651757	0.428115	0.565495	0.616613	0.440895	0.466454	0.514377	0.600639	0.501597	0.472843	0.476038	0.488818	0.539936	0.664537	0.421725	0.376997	0.571885	0.514377	0.345048	0.370607	0.555911	0.5623	0.492013	0.559105	0.415335	0.559105	0.507987	0.421725
B*35:113	0.635783	0.591054	0.638978	0.632588	0.651757	0.610224	0.670927	0.632588	0.738019	0.642173	0.674121	0.543131	0.616613	0.648562	0.642173	0.667732	0.600639	0.495208	0.600639	0.769968	0.485623	0.661342	0.4377	0.57508	0.626198	0.450479	0.476038	0.523962	0.610224	0.511182	0.482428	0.485623	0.498403	0.549521	0.674121	0.43131	0.386581	0.58147	0.565495	0.354633	0.421725	0.565495	0.571885	0.501597	0.56869	0.42492	0.56869	0.517572	0.43131
B*35:118	0.498403	0.453674	0.530351	0.495208	0.472843	0.472843	0.533546	0.520767	0.600639	0.530351	0.536741	0.405751	0.504792	0.511182	0.504792	0.530351	0.511182	0.357827	0.463259	0.632588	0.348243	0.523962	0.348243	0.536741	0.514377	0.361022	0.338658	0.386581	0.472843	0.373802	0.345048	0.348243	0.361022	0.492013	0.616613	0.373802	0.329073	0.527157	0.466454	0.316294	0.322684	0.507987	0.434505	0.444089	0.511182	0.367412	0.511182	0.460064	0.373802
B*35:124	0.616613	0.571885	0.619808	0.613419	0.591054	0.591054	0.651757	0.536741	0.71885	0.58147	0.654952	0.523962	0.555911	0.629393	0.623003	0.648562	0.58147	0.476038	0.58147	0.750799	0.466454	0.642173	0.41853	0.555911	0.607029	0.43131	0.456869	0.504792	0.591054	0.492013	0.463259	0.466454	0.479233	0.530351	0.654952	0.412141	0.367412	0.5623	0.504792	0.335463	0.361022	0.546326	0.552716	0.482428	0.549521	0.405751	0.549521	0.498403	0.412141
B*35:149	0.603834	0.559105	0.607029	0.587859	0.578275	0.645367	0.638978	0.559105	0.70607	0.56869	0.642173	0.511182	0.543131	0.616613	0.610224	0.635783	0.56869	0.520767	0.56869	0.738019	0.440895	0.629393	0.405751	0.543131	0.594249	0.405751	0.444089	0.479233	0.578275	0.482428	0.450479	0.453674	0.466454	0.504792	0.629393	0.386581	0.354633	0.536741	0.479233	0.309904	0.335463	0.520767	0.527157	0.456869	0.523962	0.380192	0.523962	0.552716	0.386581
B*35:150	0.587859	0.543131	0.591054	0.584665	0.5623	0.613419	0.623003	0.507987	0.690096	0.552716	0.626198	0.495208	0.527157	0.600639	0.594249	0.619808	0.552716	0.495208	0.552716	0.722045	0.4377	0.613419	0.389776	0.527157	0.578275	0.402556	0.428115	0.476038	0.5623	0.450479	0.434505	0.4377	0.450479	0.501597	0.626198	0.383387	0.338658	0.533546	0.476038	0.306709	0.332268	0.517572	0.523962	0.453674	0.520767	0.376997	0.520767	0.520767	0.383387
B*35:156	0.552716	0.507987	0.587859	0.549521	0.527157	0.578275	0.587859	0.472843	0.654952	0.517572	0.591054	0.460064	0.492013	0.565495	0.559105	0.584665	0.591054	0.460064	0.517572	0.686901	0.402556	0.578275	0.428115	0.565495	0.543131	0.440895	0.392971	0.440895	0.527157	0.415335	0.399361	0.402556	0.415335	0.498403	0.623003	0.380192	0.335463	0.530351	0.472843	0.345048	0.329073	0.514377	0.488818	0.450479	0.517572	0.373802	0.517572	0.517572	0.380192
B*35:158	0.603834	0.559105	0.638978	0.600639	0.578275	0.578275	0.638978	0.523962	0.70607	0.56869	0.642173	0.511182	0.543131	0.616613	0.610224	0.635783	0.642173	0.463259	0.56869	0.738019	0.453674	0.629393	0.479233	0.616613	0.594249	0.492013	0.444089	0.492013	0.578275	0.479233	0.450479	0.453674	0.466454	0.549521	0.674121	0.43131	0.386581	0.58147	0.523962	0.396166	0.380192	0.565495	0.539936	0.501597	0.56869	0.42492	0.56869	0.517572	0.43131
B*37:01	0.795527	0.750799	0.766773	0.779553	0.769968	0.821086	0.785942	0.785942	0.872204	0.738019	0.833866	0.702875	0.769968	0.846645	0.801917	0.827476	0.801917	0.645367	0.760383	0.738019	0.632588	0.821086	0.623003	0.776358	0.785942	0.638978	0.635783	0.670927	0.808307	0.587859	0.642173	0.645367	0.658147	0.670927	0.597444	0.488818	0.520767	0.702875	0.645367	0.549521	0.501597	0.686901	0.72524	0.623003	0.664537	0.514377	0.690096	0.702875	0.552716
B*37:02	0.709265	0.664537	0.71246	0.70607	0.71885	0.693291	0.699681	0.766773	0.785942	0.71885	0.747604	0.616613	0.750799	0.789137	0.715655	0.741214	0.674121	0.571885	0.674121	0.651757	0.629393	0.734824	0.626198	0.648562	0.699681	0.594249	0.635783	0.667732	0.722045	0.603834	0.642173	0.645367	0.658147	0.658147	0.584665	0.5623	0.597444	0.690096	0.667732	0.549521	0.610224	0.674121	0.680511	0.610224	0.651757	0.587859	0.677316	0.651757	0.626198
B*37:04	0.827476	0.782748	0.798722	0.811502	0.801917	0.853035	0.817891	0.817891	0.904153	0.769968	0.865815	0.734824	0.801917	0.878594	0.833866	0.859425	0.833866	0.677316	0.792332	0.769968	0.664537	0.853035	0.654952	0.808307	0.817891	0.670927	0.667732	0.702875	0.840256	0.619808	0.674121	0.677316	0.690096	0.702875	0.629393	0.520767	0.552716	0.734824	0.677316	0.58147	0.533546	0.71885	0.757188	0.654952	0.696486	0.546326	0.722045	0.734824	0.584665
B*37:05	0.709265	0.664537	0.680511	0.693291	0.683706	0.734824	0.699681	0.699681	0.785942	0.651757	0.747604	0.616613	0.683706	0.760383	0.715655	0.741214	0.715655	0.559105	0.674121	0.821086	0.546326	0.734824	0.536741	0.690096	0.699681	0.552716	0.549521	0.584665	0.722045	0.501597	0.555911	0.559105	0.571885	0.584665	0.686901	0.402556	0.434505	0.616613	0.559105	0.463259	0.415335	0.600639	0.638978	0.536741	0.603834	0.460064	0.603834	0.616613	0.466454
B*37:07	0.485623	0.440895	0.520767	0.498403	0.501597	0.527157	0.476038	0.549521	0.5623	0.559105	0.523962	0.392971	0.533546	0.565495	0.492013	0.517572	0.523962	0.488818	0.517572	0.428115	0.4377	0.511182	0.476038	0.549521	0.501597	0.460064	0.41853	0.460064	0.498403	0.463259	0.41853	0.421725	0.434505	0.571885	0.498403	0.476038	0.495208	0.607029	0.587859	0.504792	0.530351	0.587859	0.511182	0.523962	0.565495	0.501597	0.591054	0.607029	0.539936
B*37:22	0.769968	0.72524	0.741214	0.753994	0.744409	0.795527	0.760383	0.760383	0.846645	0.71246	0.808307	0.677316	0.744409	0.821086	0.776358	0.801917	0.776358	0.619808	0.734824	0.71246	0.607029	0.795527	0.597444	0.750799	0.760383	0.613419	0.610224	0.645367	0.782748	0.5623	0.616613	0.619808	0.632588	0.645367	0.571885	0.463259	0.495208	0.677316	0.619808	0.523962	0.476038	0.661342	0.699681	0.597444	0.638978	0.488818	0.664537	0.677316	0.527157
B*38:01	0.530351	0.485623	0.533546	0.530351	0.504792	0.555911	0.498403	0.552716	0.651757	0.5623	0.56869	0.4377	0.536741	0.58147	0.536741	0.5623	0.495208	0.693291	0.495208	0.392971	0.623003	0.555911	0.571885	0.469649	0.520767	0.587859	0.626198	0.661342	0.543131	0.635783	0.632588	0.635783	0.648562	0.504792	0.386581	0.584665	0.610224	0.539936	0.479233	0.565495	0.591054	0.520767	0.527157	0.456869	0.498403	0.603834	0.523962	0.536741	0.642173
B*38:02	0.520767	0.476038	0.523962	0.520767	0.495208	0.546326	0.488818	0.543131	0.642173	0.552716	0.559105	0.428115	0.527157	0.571885	0.527157	0.552716	0.485623	0.683706	0.485623	0.412141	0.613419	0.546326	0.5623	0.460064	0.511182	0.578275	0.616613	0.651757	0.533546	0.626198	0.623003	0.626198	0.638978	0.495208	0.370607	0.57508	0.600639	0.530351	0.469649	0.555911	0.58147	0.511182	0.517572	0.447284	0.488818	0.594249	0.514377	0.527157	0.632588
B*38:03	0.613419	0.56869	0.616613	0.597444	0.587859	0.638978	0.603834	0.635783	0.709265	0.645367	0.651757	0.603834	0.619808	0.664537	0.619808	0.645367	0.578275	0.520767	0.578275	0.527157	0.450479	0.638978	0.399361	0.552716	0.603834	0.415335	0.453674	0.488818	0.626198	0.463259	0.460064	0.463259	0.476038	0.56869	0.466454	0.386581	0.41853	0.603834	0.543131	0.373802	0.399361	0.584665	0.591054	0.603834	0.5623	0.412141	0.587859	0.600639	0.450479
B*38:04	0.648562	0.603834	0.651757	0.632588	0.623003	0.674121	0.616613	0.670927	0.744409	0.680511	0.686901	0.555911	0.654952	0.699681	0.654952	0.680511	0.613419	0.555911	0.613419	0.539936	0.485623	0.674121	0.434505	0.587859	0.638978	0.450479	0.488818	0.523962	0.661342	0.498403	0.495208	0.498403	0.511182	0.623003	0.498403	0.447284	0.472843	0.658147	0.597444	0.428115	0.453674	0.638978	0.645367	0.57508	0.616613	0.466454	0.642173	0.654952	0.504792
B*38:06	0.536741	0.492013	0.539936	0.536741	0.511182	0.5623	0.571885	0.559105	0.638978	0.56869	0.57508	0.444089	0.543131	0.587859	0.543131	0.56869	0.501597	0.699681	0.501597	0.399361	0.629393	0.5623	0.578275	0.476038	0.527157	0.594249	0.632588	0.667732	0.549521	0.642173	0.638978	0.642173	0.654952	0.479233	0.361022	0.616613	0.584665	0.514377	0.453674	0.539936	0.565495	0.495208	0.501597	0.43131	0.472843	0.578275	0.498403	0.511182	0.616613
B*38:09	0.533546	0.488818	0.536741	0.533546	0.507987	0.559105	0.501597	0.555911	0.654952	0.565495	0.571885	0.440895	0.539936	0.584665	0.543131	0.565495	0.498403	0.696486	0.498403	0.396166	0.626198	0.559105	0.57508	0.472843	0.523962	0.591054	0.629393	0.664537	0.546326	0.638978	0.635783	0.638978	0.651757	0.507987	0.389776	0.587859	0.613419	0.543131	0.482428	0.56869	0.594249	0.523962	0.530351	0.460064	0.501597	0.607029	0.527157	0.539936	0.645367
B*39:01	0.361022	0.316294	0.364217	0.361022	0.335463	0.386581	0.329073	0.383387	0.482428	0.392971	0.399361	0.351438	0.367412	0.412141	0.367412	0.392971	0.325879	0.523962	0.325879	0.495208	0.453674	0.386581	0.402556	0.300319	0.351438	0.41853	0.456869	0.492013	0.373802	0.466454	0.463259	0.466454	0.479233	0.335463	0.460064	0.415335	0.440895	0.370607	0.309904	0.396166	0.421725	0.351438	0.357827	0.370607	0.354633	0.466454	0.354633	0.367412	0.472843
B*39:02	0.383387	0.338658	0.386581	0.383387	0.357827	0.408946	0.373802	0.405751	0.479233	0.415335	0.421725	0.373802	0.389776	0.434505	0.389776	0.415335	0.348243	0.546326	0.348243	0.517572	0.476038	0.408946	0.42492	0.322684	0.373802	0.440895	0.479233	0.514377	0.396166	0.488818	0.485623	0.488818	0.501597	0.338658	0.463259	0.412141	0.444089	0.373802	0.313099	0.399361	0.42492	0.354633	0.361022	0.373802	0.357827	0.469649	0.357827	0.370607	0.476038
B*39:03	0.345048	0.300319	0.348243	0.345048	0.361022	0.370607	0.313099	0.408946	0.466454	0.41853	0.383387	0.335463	0.392971	0.396166	0.351438	0.376997	0.309904	0.507987	0.309904	0.479233	0.4377	0.370607	0.386581	0.284345	0.335463	0.402556	0.440895	0.476038	0.357827	0.450479	0.447284	0.450479	0.463259	0.319489	0.444089	0.399361	0.42492	0.354633	0.335463	0.380192	0.447284	0.335463	0.341853	0.354633	0.338658	0.450479	0.338658	0.351438	0.456869
B*39:04	0.383387	0.338658	0.386581	0.383387	0.357827	0.408946	0.351438	0.405751	0.504792	0.415335	0.421725	0.373802	0.389776	0.434505	0.389776	0.415335	0.348243	0.546326	0.348243	0.517572	0.476038	0.408946	0.42492	0.322684	0.373802	0.440895	0.479233	0.514377	0.357827	0.488818	0.485623	0.488818	0.501597	0.300319	0.42492	0.380192	0.405751	0.335463	0.27476	0.361022	0.386581	0.316294	0.322684	0.335463	0.319489	0.43131	0.319489	0.332268	0.4377
B*39:05	0.396166	0.351438	0.399361	0.396166	0.370607	0.421725	0.364217	0.41853	0.517572	0.428115	0.434505	0.303514	0.402556	0.447284	0.402556	0.428115	0.361022	0.559105	0.361022	0.530351	0.488818	0.421725	0.4377	0.335463	0.386581	0.453674	0.492013	0.527157	0.408946	0.501597	0.498403	0.501597	0.514377	0.370607	0.495208	0.450479	0.476038	0.405751	0.345048	0.43131	0.456869	0.386581	0.392971	0.322684	0.389776	0.501597	0.389776	0.402556	0.507987
B*39:06	0.380192	0.335463	0.383387	0.380192	0.396166	0.405751	0.348243	0.440895	0.501597	0.450479	0.41853	0.370607	0.42492	0.43131	0.386581	0.412141	0.345048	0.543131	0.345048	0.514377	0.472843	0.405751	0.421725	0.319489	0.370607	0.4377	0.476038	0.511182	0.392971	0.485623	0.482428	0.485623	0.498403	0.354633	0.479233	0.434505	0.460064	0.297125	0.370607	0.415335	0.482428	0.370607	0.376997	0.389776	0.373802	0.485623	0.373802	0.386581	0.492013
B*39:07	0.415335	0.370607	0.41853	0.428115	0.389776	0.389776	0.383387	0.4377	0.536741	0.447284	0.453674	0.322684	0.421725	0.466454	0.421725	0.447284	0.380192	0.530351	0.380192	0.549521	0.520767	0.440895	0.456869	0.354633	0.405751	0.485623	0.511182	0.559105	0.428115	0.546326	0.517572	0.520767	0.533546	0.402556	0.527157	0.482428	0.495208	0.4377	0.376997	0.463259	0.488818	0.41853	0.42492	0.354633	0.421725	0.533546	0.421725	0.370607	0.539936
B*39:08	0.380192	0.335463	0.415335	0.380192	0.354633	0.405751	0.370607	0.402556	0.476038	0.412141	0.41853	0.28754	0.386581	0.43131	0.386581	0.412141	0.41853	0.543131	0.345048	0.514377	0.472843	0.405751	0.495208	0.392971	0.370607	0.511182	0.476038	0.511182	0.392971	0.485623	0.482428	0.485623	0.498403	0.367412	0.492013	0.440895	0.472843	0.402556	0.341853	0.469649	0.453674	0.383387	0.357827	0.319489	0.386581	0.498403	0.386581	0.399361	0.504792
B*39:09	0.402556	0.357827	0.405751	0.402556	0.376997	0.428115	0.370607	0.42492	0.523962	0.434505	0.440895	0.392971	0.408946	0.453674	0.408946	0.434505	0.367412	0.565495	0.367412	0.536741	0.495208	0.428115	0.444089	0.341853	0.392971	0.460064	0.498403	0.533546	0.415335	0.507987	0.504792	0.507987	0.520767	0.376997	0.501597	0.456869	0.482428	0.412141	0.351438	0.4377	0.463259	0.392971	0.399361	0.412141	0.396166	0.507987	0.396166	0.408946	0.514377
B*39:10	0.329073	0.284345	0.332268	0.329073	0.303514	0.354633	0.361022	0.351438	0.450479	0.361022	0.367412	0.319489	0.335463	0.380192	0.335463	0.361022	0.29393	0.492013	0.29393	0.463259	0.421725	0.354633	0.370607	0.268371	0.319489	0.386581	0.42492	0.460064	0.341853	0.434505	0.43131	0.434505	0.447284	0.300319	0.42492	0.42492	0.405751	0.335463	0.27476	0.361022	0.386581	0.316294	0.322684	0.335463	0.319489	0.43131	0.319489	0.332268	0.4377
B*39:11	0.357827	0.313099	0.392971	0.357827	0.332268	0.383387	0.325879	0.380192	0.479233	0.389776	0.396166	0.265176	0.364217	0.408946	0.364217	0.389776	0.396166	0.520767	0.322684	0.492013	0.450479	0.383387	0.472843	0.370607	0.348243	0.488818	0.453674	0.488818	0.370607	0.463259	0.460064	0.463259	0.476038	0.364217	0.488818	0.444089	0.469649	0.399361	0.338658	0.466454	0.450479	0.380192	0.354633	0.316294	0.383387	0.495208	0.383387	0.396166	0.501597
B*39:12	0.41853	0.373802	0.421725	0.41853	0.392971	0.444089	0.386581	0.440895	0.539936	0.450479	0.456869	0.408946	0.42492	0.469649	0.42492	0.450479	0.383387	0.58147	0.383387	0.552716	0.511182	0.444089	0.460064	0.357827	0.408946	0.476038	0.514377	0.549521	0.43131	0.523962	0.520767	0.523962	0.536741	0.290735	0.415335	0.370607	0.396166	0.325879	0.265176	0.351438	0.376997	0.306709	0.313099	0.325879	0.309904	0.421725	0.309904	0.322684	0.428115
B*39:13	0.41853	0.373802	0.421725	0.41853	0.392971	0.444089	0.408946	0.440895	0.514377	0.450479	0.456869	0.325879	0.42492	0.469649	0.42492	0.450479	0.383387	0.58147	0.383387	0.552716	0.511182	0.444089	0.460064	0.357827	0.408946	0.476038	0.514377	0.549521	0.43131	0.523962	0.520767	0.523962	0.536741	0.373802	0.498403	0.447284	0.479233	0.408946	0.348243	0.434505	0.460064	0.389776	0.396166	0.325879	0.392971	0.504792	0.392971	0.405751	0.511182
B*39:14	0.329073	0.284345	0.332268	0.329073	0.345048	0.370607	0.297125	0.392971	0.450479	0.402556	0.367412	0.319489	0.376997	0.380192	0.335463	0.361022	0.29393	0.501597	0.29393	0.463259	0.421725	0.354633	0.370607	0.268371	0.319489	0.386581	0.42492	0.460064	0.341853	0.463259	0.43131	0.434505	0.447284	0.303514	0.428115	0.383387	0.408946	0.338658	0.319489	0.364217	0.43131	0.319489	0.325879	0.338658	0.322684	0.434505	0.322684	0.351438	0.440895
B*39:15	0.354633	0.309904	0.357827	0.367412	0.329073	0.380192	0.322684	0.376997	0.476038	0.386581	0.392971	0.345048	0.361022	0.405751	0.361022	0.386581	0.319489	0.517572	0.319489	0.488818	0.460064	0.380192	0.396166	0.29393	0.345048	0.42492	0.450479	0.498403	0.367412	0.472843	0.456869	0.460064	0.472843	0.341853	0.466454	0.421725	0.434505	0.376997	0.316294	0.402556	0.428115	0.357827	0.364217	0.376997	0.361022	0.472843	0.361022	0.361022	0.479233
B*39:20	0.373802	0.329073	0.376997	0.373802	0.348243	0.399361	0.405751	0.396166	0.495208	0.405751	0.412141	0.28115	0.380192	0.42492	0.380192	0.405751	0.338658	0.536741	0.338658	0.485623	0.466454	0.399361	0.415335	0.313099	0.364217	0.43131	0.469649	0.504792	0.386581	0.479233	0.476038	0.479233	0.492013	0.345048	0.447284	0.469649	0.450479	0.380192	0.319489	0.405751	0.43131	0.361022	0.367412	0.297125	0.364217	0.476038	0.364217	0.376997	0.482428
B*39:22	0.373802	0.329073	0.376997	0.373802	0.348243	0.399361	0.341853	0.396166	0.469649	0.405751	0.412141	0.364217	0.380192	0.42492	0.380192	0.405751	0.338658	0.536741	0.338658	0.507987	0.466454	0.399361	0.415335	0.313099	0.364217	0.43131	0.469649	0.504792	0.386581	0.479233	0.476038	0.479233	0.492013	0.348243	0.472843	0.428115	0.453674	0.383387	0.322684	0.408946	0.434505	0.364217	0.370607	0.383387	0.367412	0.479233	0.367412	0.380192	0.485623
B*39:23	0.399361	0.354633	0.402556	0.399361	0.373802	0.42492	0.389776	0.421725	0.495208	0.43131	0.4377	0.389776	0.405751	0.450479	0.405751	0.43131	0.364217	0.5623	0.364217	0.533546	0.492013	0.42492	0.440895	0.338658	0.389776	0.456869	0.495208	0.530351	0.412141	0.504792	0.501597	0.504792	0.517572	0.354633	0.479233	0.428115	0.460064	0.389776	0.329073	0.415335	0.440895	0.370607	0.376997	0.389776	0.373802	0.485623	0.373802	0.386581	0.492013
B*39:24	0.376997	0.332268	0.380192	0.376997	0.392971	0.402556	0.345048	0.440895	0.498403	0.450479	0.415335	0.367412	0.42492	0.428115	0.383387	0.408946	0.341853	0.539936	0.341853	0.511182	0.469649	0.402556	0.41853	0.316294	0.367412	0.434505	0.472843	0.507987	0.389776	0.482428	0.479233	0.482428	0.495208	0.351438	0.476038	0.43131	0.456869	0.386581	0.367412	0.412141	0.479233	0.367412	0.373802	0.386581	0.370607	0.482428	0.370607	0.383387	0.488818
B*39:31	0.392971	0.348243	0.396166	0.392971	0.367412	0.41853	0.361022	0.415335	0.514377	0.42492	0.43131	0.383387	0.399361	0.444089	0.399361	0.42492	0.357827	0.555911	0.357827	0.527157	0.485623	0.41853	0.434505	0.332268	0.383387	0.450479	0.488818	0.523962	0.405751	0.498403	0.495208	0.498403	0.511182	0.319489	0.444089	0.399361	0.42492	0.354633	0.29393	0.380192	0.405751	0.335463	0.341853	0.354633	0.338658	0.450479	0.338658	0.351438	0.456869
B*39:35	0.450479	0.405751	0.453674	0.434505	0.42492	0.476038	0.41853	0.472843	0.571885	0.482428	0.488818	0.440895	0.456869	0.501597	0.456869	0.482428	0.415335	0.357827	0.415335	0.584665	0.28754	0.476038	0.236422	0.440895	0.466454	0.252396	0.290735	0.325879	0.463259	0.300319	0.297125	0.300319	0.313099	0.476038	0.600639	0.300319	0.325879	0.511182	0.450479	0.28115	0.306709	0.492013	0.447284	0.511182	0.495208	0.351438	0.495208	0.507987	0.357827
B*39:36	0.421725	0.376997	0.453674	0.405751	0.396166	0.447284	0.389776	0.444089	0.543131	0.453674	0.460064	0.412141	0.428115	0.472843	0.428115	0.453674	0.434505	0.329073	0.386581	0.555911	0.258786	0.447284	0.255591	0.460064	0.4377	0.271565	0.261981	0.297125	0.434505	0.271565	0.268371	0.271565	0.284345	0.476038	0.600639	0.300319	0.325879	0.511182	0.450479	0.300319	0.306709	0.492013	0.41853	0.511182	0.495208	0.351438	0.495208	0.507987	0.357827
B*39:37	0.380192	0.335463	0.383387	0.380192	0.396166	0.405751	0.348243	0.444089	0.501597	0.453674	0.41853	0.28754	0.428115	0.43131	0.386581	0.412141	0.345048	0.543131	0.345048	0.514377	0.472843	0.405751	0.421725	0.319489	0.370607	0.4377	0.476038	0.511182	0.392971	0.485623	0.482428	0.485623	0.498403	0.354633	0.479233	0.434505	0.460064	0.389776	0.370607	0.415335	0.482428	0.370607	0.376997	0.306709	0.373802	0.485623	0.373802	0.386581	0.492013
B*39:38	0.412141	0.367412	0.415335	0.412141	0.386581	0.4377	0.380192	0.434505	0.533546	0.444089	0.450479	0.402556	0.41853	0.463259	0.41853	0.444089	0.376997	0.57508	0.376997	0.546326	0.504792	0.4377	0.453674	0.351438	0.402556	0.469649	0.507987	0.543131	0.42492	0.517572	0.514377	0.517572	0.530351	0.386581	0.511182	0.466454	0.492013	0.421725	0.361022	0.447284	0.472843	0.402556	0.408946	0.421725	0.405751	0.517572	0.405751	0.41853	0.523962
B*39:39	0.370607	0.325879	0.373802	0.370607	0.345048	0.396166	0.361022	0.392971	0.492013	0.402556	0.408946	0.361022	0.376997	0.421725	0.376997	0.402556	0.335463	0.533546	0.335463	0.504792	0.463259	0.396166	0.412141	0.309904	0.361022	0.428115	0.466454	0.501597	0.383387	0.476038	0.472843	0.476038	0.488818	0.325879	0.450479	0.399361	0.43131	0.361022	0.300319	0.386581	0.412141	0.341853	0.348243	0.361022	0.345048	0.456869	0.345048	0.357827	0.463259
B*39:47	0.338658	0.29393	0.341853	0.338658	0.313099	0.364217	0.306709	0.361022	0.460064	0.370607	0.376997	0.329073	0.345048	0.41853	0.345048	0.370607	0.303514	0.501597	0.303514	0.472843	0.43131	0.364217	0.42492	0.277955	0.329073	0.396166	0.434505	0.469649	0.351438	0.444089	0.440895	0.444089	0.456869	0.357827	0.482428	0.4377	0.463259	0.392971	0.332268	0.41853	0.444089	0.373802	0.380192	0.392971	0.376997	0.488818	0.376997	0.389776	0.495208
B*39:49	0.412141	0.367412	0.415335	0.42492	0.386581	0.4377	0.402556	0.434505	0.507987	0.444089	0.450479	0.319489	0.41853	0.463259	0.41853	0.444089	0.376997	0.57508	0.376997	0.546326	0.517572	0.4377	0.453674	0.351438	0.402556	0.482428	0.507987	0.555911	0.42492	0.530351	0.514377	0.517572	0.530351	0.380192	0.504792	0.453674	0.472843	0.415335	0.354633	0.440895	0.466454	0.396166	0.402556	0.332268	0.399361	0.511182	0.399361	0.399361	0.517572
B*39:52	0.472843	0.4377	0.476038	0.456869	0.447284	0.498403	0.440895	0.495208	0.594249	0.504792	0.511182	0.472843	0.479233	0.523962	0.479233	0.504792	0.4377	0.380192	0.4377	0.607029	0.309904	0.498403	0.258786	0.412141	0.463259	0.27476	0.313099	0.348243	0.485623	0.322684	0.319489	0.322684	0.335463	0.456869	0.58147	0.28115	0.306709	0.492013	0.43131	0.261981	0.28754	0.472843	0.479233	0.492013	0.476038	0.332268	0.476038	0.488818	0.338658
B*40:01	0.520767	0.476038	0.523962	0.520767	0.495208	0.5623	0.511182	0.543131	0.603834	0.552716	0.559105	0.428115	0.527157	0.600639	0.527157	0.552716	0.485623	0.616613	0.552716	0.654952	0.552716	0.546326	0.530351	0.460064	0.511182	0.501597	0.546326	0.57508	0.495208	0.578275	0.546326	0.549521	0.5623	0.453674	0.578275	0.450479	0.482428	0.488818	0.428115	0.4377	0.463259	0.469649	0.476038	0.405751	0.472843	0.507987	0.472843	0.501597	0.514377
B*40:02	0.523962	0.479233	0.527157	0.523962	0.539936	0.565495	0.514377	0.587859	0.607029	0.597444	0.5623	0.43131	0.571885	0.603834	0.530351	0.555911	0.488818	0.527157	0.488818	0.658147	0.447284	0.549521	0.440895	0.463259	0.514377	0.412141	0.450479	0.485623	0.536741	0.488818	0.456869	0.460064	0.472843	0.476038	0.600639	0.380192	0.412141	0.511182	0.492013	0.367412	0.434505	0.492013	0.498403	0.428115	0.495208	0.4377	0.495208	0.523962	0.444089
B*40:03	0.559105	0.514377	0.5623	0.571885	0.57508	0.533546	0.549521	0.623003	0.642173	0.632588	0.597444	0.466454	0.607029	0.638978	0.565495	0.591054	0.523962	0.504792	0.523962	0.693291	0.495208	0.584665	0.476038	0.498403	0.549521	0.460064	0.485623	0.533546	0.571885	0.520767	0.492013	0.495208	0.507987	0.523962	0.648562	0.428115	0.447284	0.559105	0.539936	0.415335	0.482428	0.539936	0.546326	0.476038	0.543131	0.485623	0.543131	0.492013	0.492013
B*40:04	0.587859	0.543131	0.591054	0.587859	0.5623	0.629393	0.578275	0.507987	0.670927	0.552716	0.626198	0.495208	0.527157	0.667732	0.594249	0.619808	0.552716	0.591054	0.552716	0.722045	0.511182	0.613419	0.504792	0.527157	0.578275	0.476038	0.514377	0.549521	0.600639	0.552716	0.520767	0.523962	0.536741	0.539936	0.664537	0.444089	0.476038	0.571885	0.514377	0.43131	0.456869	0.555911	0.5623	0.492013	0.559105	0.501597	0.559105	0.587859	0.507987
B*40:05	0.530351	0.485623	0.533546	0.530351	0.546326	0.571885	0.520767	0.594249	0.613419	0.603834	0.56869	0.4377	0.578275	0.543131	0.536741	0.5623	0.495208	0.533546	0.495208	0.664537	0.453674	0.555911	0.41853	0.520767	0.546326	0.41853	0.456869	0.492013	0.543131	0.495208	0.463259	0.466454	0.479233	0.504792	0.629393	0.408946	0.440895	0.539936	0.520767	0.396166	0.463259	0.520767	0.476038	0.456869	0.523962	0.466454	0.523962	0.552716	0.472843
B*40:06	0.559105	0.514377	0.5623	0.559105	0.57508	0.600639	0.549521	0.619808	0.642173	0.629393	0.597444	0.466454	0.603834	0.638978	0.565495	0.591054	0.523962	0.5623	0.523962	0.693291	0.482428	0.584665	0.476038	0.498403	0.549521	0.447284	0.485623	0.520767	0.571885	0.523962	0.492013	0.495208	0.507987	0.511182	0.635783	0.415335	0.447284	0.453674	0.527157	0.402556	0.469649	0.527157	0.533546	0.463259	0.530351	0.472843	0.530351	0.559105	0.479233
B*40:07	0.495208	0.450479	0.498403	0.495208	0.469649	0.536741	0.530351	0.517572	0.578275	0.527157	0.533546	0.402556	0.501597	0.57508	0.501597	0.527157	0.460064	0.591054	0.527157	0.629393	0.527157	0.520767	0.504792	0.434505	0.485623	0.476038	0.520767	0.549521	0.469649	0.552716	0.520767	0.523962	0.536741	0.415335	0.539936	0.476038	0.444089	0.450479	0.389776	0.399361	0.42492	0.43131	0.4377	0.367412	0.434505	0.469649	0.434505	0.463259	0.476038
B*40:08	0.485623	0.440895	0.488818	0.485623	0.501597	0.527157	0.520767	0.549521	0.594249	0.559105	0.523962	0.392971	0.533546	0.565495	0.492013	0.517572	0.450479	0.488818	0.450479	0.619808	0.408946	0.511182	0.402556	0.42492	0.476038	0.373802	0.412141	0.447284	0.498403	0.450479	0.41853	0.421725	0.434505	0.42492	0.549521	0.392971	0.361022	0.460064	0.440895	0.316294	0.383387	0.440895	0.447284	0.376997	0.444089	0.386581	0.444089	0.472843	0.392971
B*40:09	0.543131	0.498403	0.546326	0.555911	0.559105	0.584665	0.533546	0.607029	0.626198	0.559105	0.58147	0.450479	0.591054	0.623003	0.549521	0.57508	0.507987	0.488818	0.507987	0.677316	0.479233	0.56869	0.460064	0.482428	0.533546	0.444089	0.469649	0.517572	0.555911	0.463259	0.476038	0.479233	0.492013	0.507987	0.632588	0.412141	0.43131	0.543131	0.523962	0.399361	0.466454	0.523962	0.530351	0.460064	0.527157	0.469649	0.527157	0.543131	0.476038
B*40:10	0.514377	0.469649	0.517572	0.514377	0.488818	0.555911	0.504792	0.536741	0.597444	0.546326	0.552716	0.421725	0.520767	0.594249	0.520767	0.546326	0.479233	0.517572	0.546326	0.648562	0.453674	0.539936	0.43131	0.453674	0.504792	0.402556	0.447284	0.476038	0.488818	0.479233	0.447284	0.450479	0.463259	0.495208	0.619808	0.399361	0.43131	0.530351	0.469649	0.386581	0.412141	0.511182	0.517572	0.447284	0.514377	0.456869	0.514377	0.543131	0.463259
B*40:11	0.539936	0.495208	0.543131	0.539936	0.514377	0.58147	0.530351	0.5623	0.623003	0.571885	0.578275	0.447284	0.546326	0.619808	0.546326	0.571885	0.504792	0.543131	0.504792	0.674121	0.463259	0.565495	0.456869	0.479233	0.530351	0.428115	0.466454	0.501597	0.552716	0.504792	0.472843	0.476038	0.488818	0.492013	0.616613	0.396166	0.428115	0.527157	0.466454	0.383387	0.408946	0.507987	0.514377	0.444089	0.511182	0.453674	0.511182	0.539936	0.460064
B*40:12	0.4377	0.392971	0.440895	0.4377	0.412141	0.479233	0.428115	0.460064	0.533546	0.469649	0.476038	0.345048	0.444089	0.517572	0.444089	0.469649	0.402556	0.511182	0.469649	0.571885	0.447284	0.463259	0.42492	0.376997	0.428115	0.396166	0.440895	0.469649	0.412141	0.472843	0.440895	0.444089	0.456869	0.41853	0.543131	0.392971	0.42492	0.453674	0.392971	0.380192	0.405751	0.434505	0.440895	0.370607	0.4377	0.450479	0.4377	0.466454	0.456869
B*40:13	0.632588	0.587859	0.635783	0.632588	0.648562	0.674121	0.667732	0.696486	0.715655	0.70607	0.670927	0.539936	0.680511	0.71246	0.638978	0.664537	0.597444	0.635783	0.597444	0.495208	0.555911	0.658147	0.549521	0.571885	0.623003	0.520767	0.559105	0.594249	0.645367	0.597444	0.565495	0.56869	0.58147	0.571885	0.453674	0.539936	0.507987	0.607029	0.587859	0.463259	0.530351	0.587859	0.594249	0.523962	0.565495	0.501597	0.591054	0.619808	0.539936
B*40:14	0.543131	0.498403	0.546326	0.527157	0.517572	0.584665	0.533546	0.565495	0.626198	0.57508	0.58147	0.450479	0.549521	0.623003	0.549521	0.57508	0.507987	0.460064	0.57508	0.677316	0.396166	0.56869	0.373802	0.482428	0.533546	0.345048	0.389776	0.41853	0.517572	0.421725	0.389776	0.392971	0.405751	0.476038	0.600639	0.29393	0.325879	0.511182	0.450479	0.28115	0.306709	0.492013	0.498403	0.428115	0.495208	0.351438	0.495208	0.523962	0.357827
B*40:16	0.383387	0.338658	0.41853	0.383387	0.399361	0.42492	0.373802	0.447284	0.466454	0.456869	0.421725	0.290735	0.43131	0.463259	0.389776	0.415335	0.421725	0.479233	0.415335	0.517572	0.415335	0.408946	0.466454	0.447284	0.399361	0.4377	0.408946	0.4377	0.357827	0.440895	0.408946	0.412141	0.42492	0.399361	0.523962	0.396166	0.428115	0.434505	0.415335	0.42492	0.450479	0.415335	0.338658	0.351438	0.41853	0.453674	0.41853	0.447284	0.460064
B*40:18	0.530351	0.485623	0.533546	0.527157	0.546326	0.571885	0.520767	0.594249	0.613419	0.603834	0.56869	0.4377	0.578275	0.610224	0.536741	0.5623	0.495208	0.447284	0.495208	0.664537	0.380192	0.555911	0.361022	0.469649	0.520767	0.345048	0.370607	0.41853	0.543131	0.421725	0.376997	0.380192	0.392971	0.495208	0.619808	0.313099	0.332268	0.530351	0.511182	0.300319	0.367412	0.511182	0.517572	0.447284	0.514377	0.370607	0.514377	0.530351	0.376997
B*40:19	0.658147	0.613419	0.661342	0.658147	0.674121	0.699681	0.648562	0.722045	0.741214	0.731629	0.696486	0.565495	0.70607	0.738019	0.664537	0.690096	0.623003	0.661342	0.623003	0.520767	0.58147	0.683706	0.57508	0.597444	0.648562	0.546326	0.584665	0.619808	0.670927	0.623003	0.591054	0.594249	0.607029	0.610224	0.492013	0.514377	0.546326	0.645367	0.626198	0.501597	0.56869	0.626198	0.632588	0.5623	0.603834	0.539936	0.629393	0.658147	0.578275
B*40:20	0.57508	0.530351	0.578275	0.587859	0.549521	0.549521	0.565495	0.597444	0.658147	0.607029	0.613419	0.482428	0.58147	0.654952	0.58147	0.607029	0.539936	0.520767	0.539936	0.709265	0.511182	0.600639	0.492013	0.514377	0.565495	0.476038	0.501597	0.549521	0.587859	0.536741	0.507987	0.511182	0.523962	0.539936	0.664537	0.444089	0.463259	0.57508	0.514377	0.43131	0.456869	0.555911	0.5623	0.492013	0.559105	0.501597	0.559105	0.507987	0.507987
B*40:21	0.492013	0.447284	0.495208	0.492013	0.466454	0.533546	0.482428	0.514377	0.56869	0.523962	0.530351	0.399361	0.498403	0.571885	0.498403	0.523962	0.456869	0.565495	0.523962	0.626198	0.501597	0.517572	0.479233	0.43131	0.482428	0.450479	0.495208	0.523962	0.466454	0.527157	0.495208	0.498403	0.511182	0.472843	0.597444	0.447284	0.479233	0.507987	0.447284	0.434505	0.460064	0.488818	0.495208	0.42492	0.492013	0.504792	0.492013	0.520767	0.511182
B*40:23	0.408946	0.364217	0.444089	0.408946	0.383387	0.450479	0.399361	0.43131	0.492013	0.440895	0.447284	0.316294	0.415335	0.488818	0.415335	0.440895	0.447284	0.504792	0.440895	0.543131	0.440895	0.434505	0.492013	0.472843	0.42492	0.463259	0.434505	0.463259	0.383387	0.466454	0.434505	0.4377	0.450479	0.42492	0.549521	0.421725	0.453674	0.460064	0.399361	0.450479	0.434505	0.440895	0.364217	0.376997	0.444089	0.479233	0.444089	0.472843	0.485623
B*40:25	0.587859	0.543131	0.591054	0.571885	0.5623	0.629393	0.578275	0.610224	0.696486	0.619808	0.626198	0.495208	0.594249	0.667732	0.594249	0.619808	0.552716	0.504792	0.619808	0.722045	0.440895	0.613419	0.41853	0.527157	0.578275	0.389776	0.434505	0.463259	0.5623	0.466454	0.434505	0.4377	0.450479	0.520767	0.645367	0.338658	0.370607	0.555911	0.495208	0.325879	0.351438	0.536741	0.543131	0.472843	0.539936	0.396166	0.539936	0.56869	0.402556
B*40:26	0.5623	0.517572	0.565495	0.546326	0.536741	0.603834	0.552716	0.584665	0.645367	0.594249	0.600639	0.469649	0.56869	0.57508	0.56869	0.594249	0.527157	0.549521	0.527157	0.696486	0.469649	0.587859	0.434505	0.552716	0.578275	0.434505	0.472843	0.507987	0.57508	0.511182	0.479233	0.482428	0.495208	0.536741	0.661342	0.42492	0.456869	0.571885	0.511182	0.412141	0.4377	0.552716	0.507987	0.488818	0.555911	0.482428	0.555911	0.584665	0.488818
B*40:27	0.559105	0.514377	0.5623	0.559105	0.57508	0.549521	0.549521	0.623003	0.642173	0.632588	0.597444	0.466454	0.607029	0.638978	0.565495	0.591054	0.523962	0.498403	0.523962	0.693291	0.482428	0.584665	0.476038	0.498403	0.549521	0.447284	0.485623	0.520767	0.571885	0.517572	0.492013	0.495208	0.507987	0.511182	0.635783	0.415335	0.447284	0.546326	0.527157	0.402556	0.469649	0.527157	0.533546	0.463259	0.530351	0.472843	0.530351	0.507987	0.479233
B*40:29	0.5623	0.517572	0.565495	0.546326	0.578275	0.603834	0.552716	0.626198	0.645367	0.635783	0.600639	0.469649	0.610224	0.642173	0.56869	0.594249	0.527157	0.479233	0.527157	0.696486	0.399361	0.587859	0.392971	0.501597	0.552716	0.364217	0.402556	0.4377	0.57508	0.440895	0.408946	0.412141	0.42492	0.514377	0.638978	0.332268	0.364217	0.549521	0.530351	0.319489	0.386581	0.530351	0.536741	0.466454	0.533546	0.389776	0.533546	0.5623	0.396166
B*40:30	0.555911	0.511182	0.559105	0.555911	0.5623	0.597444	0.546326	0.543131	0.638978	0.552716	0.594249	0.463259	0.527157	0.635783	0.5623	0.587859	0.520767	0.651757	0.587859	0.690096	0.587859	0.58147	0.565495	0.495208	0.546326	0.536741	0.58147	0.610224	0.530351	0.613419	0.58147	0.584665	0.597444	0.488818	0.613419	0.485623	0.517572	0.507987	0.495208	0.472843	0.530351	0.504792	0.511182	0.440895	0.507987	0.543131	0.507987	0.536741	0.549521
B*40:31	0.498403	0.453674	0.501597	0.511182	0.514377	0.539936	0.488818	0.5623	0.58147	0.571885	0.536741	0.405751	0.546326	0.578275	0.504792	0.530351	0.463259	0.594249	0.530351	0.632588	0.543131	0.523962	0.507987	0.4377	0.488818	0.492013	0.523962	0.565495	0.472843	0.56869	0.523962	0.527157	0.539936	0.444089	0.56869	0.440895	0.460064	0.479233	0.460064	0.428115	0.495208	0.460064	0.466454	0.396166	0.463259	0.498403	0.463259	0.479233	0.504792
B*40:33	0.546326	0.501597	0.549521	0.559105	0.520767	0.587859	0.536741	0.56869	0.629393	0.578275	0.584665	0.453674	0.552716	0.626198	0.552716	0.578275	0.511182	0.594249	0.578275	0.680511	0.543131	0.571885	0.507987	0.485623	0.536741	0.492013	0.523962	0.565495	0.520767	0.56869	0.523962	0.527157	0.539936	0.492013	0.616613	0.440895	0.460064	0.527157	0.466454	0.428115	0.453674	0.507987	0.514377	0.444089	0.511182	0.498403	0.511182	0.527157	0.504792
B*40:37	0.533546	0.488818	0.536741	0.533546	0.549521	0.57508	0.523962	0.597444	0.616613	0.607029	0.571885	0.440895	0.58147	0.613419	0.539936	0.565495	0.498403	0.536741	0.498403	0.645367	0.456869	0.559105	0.450479	0.472843	0.523962	0.421725	0.460064	0.495208	0.546326	0.498403	0.466454	0.469649	0.482428	0.485623	0.587859	0.389776	0.421725	0.520767	0.501597	0.376997	0.444089	0.501597	0.507987	0.4377	0.504792	0.447284	0.504792	0.533546	0.453674
B*40:40	0.434505	0.389776	0.4377	0.434505	0.450479	0.476038	0.42492	0.498403	0.517572	0.507987	0.472843	0.341853	0.482428	0.514377	0.440895	0.466454	0.399361	0.507987	0.399361	0.56869	0.428115	0.460064	0.421725	0.373802	0.42492	0.392971	0.43131	0.466454	0.447284	0.469649	0.4377	0.440895	0.453674	0.434505	0.559105	0.408946	0.440895	0.469649	0.450479	0.396166	0.463259	0.450479	0.456869	0.386581	0.453674	0.466454	0.453674	0.482428	0.472843
B*40:44	0.565495	0.520767	0.56869	0.5623	0.58147	0.607029	0.555911	0.626198	0.648562	0.635783	0.603834	0.472843	0.610224	0.645367	0.571885	0.597444	0.530351	0.482428	0.530351	0.699681	0.415335	0.591054	0.396166	0.504792	0.555911	0.380192	0.405751	0.453674	0.578275	0.456869	0.412141	0.415335	0.428115	0.530351	0.654952	0.348243	0.367412	0.472843	0.546326	0.335463	0.402556	0.546326	0.552716	0.482428	0.549521	0.405751	0.549521	0.565495	0.412141
B*40:45	0.536741	0.492013	0.539936	0.520767	0.552716	0.578275	0.527157	0.600639	0.619808	0.610224	0.57508	0.444089	0.584665	0.616613	0.543131	0.56869	0.501597	0.453674	0.56869	0.670927	0.389776	0.5623	0.367412	0.476038	0.527157	0.338658	0.383387	0.412141	0.511182	0.415335	0.383387	0.386581	0.399361	0.469649	0.594249	0.28754	0.319489	0.504792	0.485623	0.27476	0.341853	0.485623	0.492013	0.421725	0.488818	0.345048	0.488818	0.517572	0.351438
B*40:48	0.559105	0.514377	0.5623	0.559105	0.533546	0.5623	0.549521	0.58147	0.642173	0.591054	0.597444	0.466454	0.565495	0.638978	0.565495	0.591054	0.523962	0.616613	0.591054	0.693291	0.591054	0.584665	0.56869	0.498403	0.549521	0.539936	0.584665	0.613419	0.533546	0.591054	0.584665	0.587859	0.600639	0.492013	0.616613	0.488818	0.520767	0.527157	0.466454	0.476038	0.501597	0.507987	0.514377	0.444089	0.511182	0.546326	0.511182	0.501597	0.552716
B*40:49	0.56869	0.523962	0.571885	0.552716	0.543131	0.610224	0.559105	0.591054	0.651757	0.600639	0.607029	0.476038	0.57508	0.648562	0.57508	0.600639	0.533546	0.485623	0.600639	0.702875	0.421725	0.594249	0.399361	0.507987	0.559105	0.370607	0.415335	0.444089	0.543131	0.447284	0.415335	0.41853	0.43131	0.549521	0.674121	0.367412	0.399361	0.584665	0.523962	0.354633	0.380192	0.565495	0.571885	0.501597	0.56869	0.42492	0.56869	0.597444	0.43131
B*40:50	0.488818	0.444089	0.492013	0.488818	0.504792	0.530351	0.479233	0.552716	0.571885	0.5623	0.527157	0.479233	0.536741	0.56869	0.495208	0.520767	0.453674	0.492013	0.453674	0.623003	0.412141	0.514377	0.405751	0.428115	0.479233	0.376997	0.415335	0.450479	0.501597	0.453674	0.421725	0.42492	0.4377	0.440895	0.565495	0.345048	0.376997	0.476038	0.456869	0.332268	0.399361	0.456869	0.463259	0.476038	0.460064	0.402556	0.460064	0.488818	0.408946
B*40:52	0.555911	0.511182	0.559105	0.56869	0.530351	0.530351	0.546326	0.578275	0.638978	0.587859	0.594249	0.463259	0.5623	0.635783	0.5623	0.587859	0.520767	0.594249	0.587859	0.690096	0.600639	0.58147	0.565495	0.495208	0.546326	0.549521	0.58147	0.623003	0.530351	0.610224	0.58147	0.584665	0.597444	0.501597	0.626198	0.498403	0.517572	0.536741	0.476038	0.485623	0.511182	0.517572	0.523962	0.453674	0.520767	0.555911	0.520767	0.469649	0.5623
B*40:54	0.546326	0.501597	0.549521	0.546326	0.520767	0.587859	0.536741	0.56869	0.629393	0.578275	0.584665	0.453674	0.552716	0.626198	0.552716	0.578275	0.511182	0.642173	0.578275	0.680511	0.578275	0.571885	0.555911	0.485623	0.536741	0.527157	0.571885	0.600639	0.520767	0.603834	0.571885	0.57508	0.587859	0.479233	0.603834	0.476038	0.507987	0.514377	0.453674	0.463259	0.488818	0.495208	0.501597	0.43131	0.498403	0.533546	0.498403	0.527157	0.539936
B*40:63	0.632588	0.587859	0.635783	0.616613	0.607029	0.674121	0.623003	0.654952	0.715655	0.664537	0.670927	0.539936	0.638978	0.645367	0.638978	0.664537	0.597444	0.549521	0.664537	0.766773	0.485623	0.658147	0.434505	0.571885	0.623003	0.434505	0.479233	0.507987	0.607029	0.511182	0.479233	0.482428	0.495208	0.536741	0.661342	0.354633	0.386581	0.571885	0.511182	0.341853	0.367412	0.552716	0.559105	0.488818	0.555911	0.412141	0.555911	0.584665	0.41853
B*40:64	0.571885	0.527157	0.57508	0.571885	0.546326	0.613419	0.5623	0.527157	0.654952	0.536741	0.610224	0.479233	0.511182	0.651757	0.578275	0.603834	0.536741	0.57508	0.536741	0.70607	0.495208	0.597444	0.488818	0.511182	0.5623	0.460064	0.498403	0.533546	0.584665	0.536741	0.504792	0.507987	0.520767	0.523962	0.648562	0.428115	0.460064	0.555911	0.498403	0.415335	0.440895	0.539936	0.546326	0.476038	0.543131	0.485623	0.543131	0.571885	0.492013
B*40:76	0.565495	0.520767	0.56869	0.565495	0.539936	0.607029	0.555911	0.587859	0.648562	0.597444	0.603834	0.472843	0.571885	0.645367	0.571885	0.597444	0.530351	0.613419	0.597444	0.686901	0.549521	0.591054	0.527157	0.504792	0.555911	0.498403	0.543131	0.571885	0.539936	0.57508	0.543131	0.546326	0.559105	0.498403	0.613419	0.447284	0.479233	0.533546	0.472843	0.434505	0.460064	0.514377	0.520767	0.450479	0.517572	0.504792	0.517572	0.546326	0.511182
B*40:80	0.504792	0.460064	0.507987	0.504792	0.520767	0.546326	0.495208	0.56869	0.587859	0.578275	0.543131	0.412141	0.552716	0.584665	0.511182	0.536741	0.469649	0.600639	0.536741	0.638978	0.536741	0.530351	0.514377	0.444089	0.495208	0.485623	0.530351	0.559105	0.479233	0.5623	0.530351	0.533546	0.546326	0.4377	0.5623	0.434505	0.466454	0.472843	0.453674	0.421725	0.488818	0.453674	0.460064	0.389776	0.456869	0.492013	0.456869	0.485623	0.498403
B*40:89	0.591054	0.546326	0.594249	0.591054	0.607029	0.632588	0.58147	0.654952	0.674121	0.607029	0.629393	0.498403	0.638978	0.670927	0.597444	0.623003	0.555911	0.466454	0.555911	0.72524	0.444089	0.616613	0.4377	0.530351	0.58147	0.408946	0.447284	0.482428	0.603834	0.428115	0.453674	0.456869	0.469649	0.543131	0.667732	0.376997	0.408946	0.578275	0.559105	0.364217	0.43131	0.559105	0.565495	0.495208	0.5623	0.434505	0.5623	0.591054	0.440895
B*40:90	0.555911	0.511182	0.559105	0.555911	0.571885	0.597444	0.546326	0.619808	0.638978	0.629393	0.594249	0.463259	0.603834	0.635783	0.5623	0.587859	0.520767	0.559105	0.520767	0.690096	0.479233	0.58147	0.472843	0.495208	0.546326	0.444089	0.482428	0.517572	0.56869	0.520767	0.488818	0.492013	0.504792	0.507987	0.632588	0.412141	0.444089	0.543131	0.523962	0.399361	0.466454	0.523962	0.530351	0.460064	0.527157	0.469649	0.527157	0.555911	0.476038
B*40:99	0.571885	0.527157	0.57508	0.571885	0.546326	0.613419	0.5623	0.527157	0.654952	0.571885	0.610224	0.479233	0.546326	0.651757	0.578275	0.603834	0.536741	0.57508	0.536741	0.70607	0.495208	0.597444	0.488818	0.511182	0.5623	0.460064	0.498403	0.533546	0.584665	0.536741	0.504792	0.507987	0.520767	0.523962	0.648562	0.428115	0.460064	0.555911	0.498403	0.415335	0.440895	0.539936	0.546326	0.476038	0.543131	0.485623	0.543131	0.571885	0.492013
B*40:110	0.674121	0.629393	0.677316	0.674121	0.690096	0.715655	0.664537	0.734824	0.757188	0.744409	0.71246	0.58147	0.71885	0.753994	0.680511	0.70607	0.638978	0.677316	0.638978	0.565495	0.597444	0.699681	0.591054	0.613419	0.664537	0.5623	0.600639	0.635783	0.648562	0.638978	0.607029	0.610224	0.623003	0.616613	0.492013	0.520767	0.552716	0.559105	0.632588	0.507987	0.57508	0.632588	0.638978	0.56869	0.610224	0.546326	0.635783	0.664537	0.584665
B*40:115	0.555911	0.511182	0.559105	0.539936	0.571885	0.597444	0.546326	0.619808	0.638978	0.629393	0.594249	0.463259	0.603834	0.635783	0.5623	0.587859	0.520767	0.472843	0.520767	0.690096	0.392971	0.58147	0.386581	0.495208	0.546326	0.357827	0.396166	0.43131	0.56869	0.434505	0.402556	0.405751	0.41853	0.507987	0.632588	0.325879	0.357827	0.543131	0.523962	0.313099	0.380192	0.523962	0.530351	0.460064	0.527157	0.383387	0.527157	0.555911	0.389776
B*40:119	0.527157	0.482428	0.530351	0.527157	0.543131	0.56869	0.517572	0.591054	0.610224	0.600639	0.565495	0.434505	0.57508	0.607029	0.533546	0.559105	0.492013	0.530351	0.492013	0.661342	0.450479	0.552716	0.444089	0.466454	0.517572	0.415335	0.453674	0.488818	0.539936	0.492013	0.460064	0.463259	0.476038	0.479233	0.603834	0.383387	0.415335	0.514377	0.495208	0.370607	0.4377	0.495208	0.501597	0.43131	0.498403	0.440895	0.498403	0.527157	0.447284
B*40:122	0.584665	0.539936	0.587859	0.56869	0.600639	0.626198	0.57508	0.648562	0.667732	0.658147	0.623003	0.492013	0.632588	0.664537	0.591054	0.616613	0.549521	0.501597	0.549521	0.71885	0.421725	0.610224	0.415335	0.523962	0.57508	0.386581	0.42492	0.460064	0.597444	0.463259	0.43131	0.434505	0.447284	0.536741	0.661342	0.354633	0.386581	0.571885	0.552716	0.341853	0.408946	0.552716	0.559105	0.488818	0.555911	0.412141	0.555911	0.584665	0.41853
B*40:124	0.607029	0.5623	0.610224	0.603834	0.58147	0.591054	0.597444	0.629393	0.690096	0.58147	0.645367	0.514377	0.613419	0.686901	0.613419	0.638978	0.571885	0.5623	0.638978	0.741214	0.635783	0.632588	0.616613	0.546326	0.597444	0.584665	0.632588	0.658147	0.58147	0.594249	0.632588	0.635783	0.648562	0.536741	0.661342	0.533546	0.56869	0.571885	0.511182	0.520767	0.546326	0.552716	0.559105	0.488818	0.555911	0.591054	0.555911	0.530351	0.597444
B*40:126	0.530351	0.485623	0.533546	0.530351	0.504792	0.571885	0.520767	0.552716	0.613419	0.5623	0.56869	0.4377	0.536741	0.610224	0.536741	0.5623	0.495208	0.626198	0.5623	0.664537	0.5623	0.555911	0.539936	0.469649	0.520767	0.511182	0.555911	0.584665	0.504792	0.587859	0.555911	0.559105	0.571885	0.463259	0.587859	0.460064	0.492013	0.498403	0.4377	0.447284	0.472843	0.479233	0.485623	0.415335	0.482428	0.517572	0.482428	0.511182	0.523962
B*40:129	0.578275	0.533546	0.58147	0.578275	0.552716	0.619808	0.56869	0.498403	0.661342	0.543131	0.616613	0.485623	0.517572	0.658147	0.584665	0.610224	0.543131	0.58147	0.543131	0.71246	0.501597	0.603834	0.495208	0.517572	0.56869	0.466454	0.504792	0.539936	0.552716	0.543131	0.511182	0.514377	0.527157	0.520767	0.645367	0.42492	0.456869	0.552716	0.495208	0.412141	0.4377	0.536741	0.543131	0.472843	0.539936	0.482428	0.539936	0.56869	0.488818
B*40:130	0.632588	0.587859	0.635783	0.616613	0.607029	0.674121	0.623003	0.654952	0.715655	0.664537	0.670927	0.539936	0.638978	0.71246	0.638978	0.664537	0.597444	0.549521	0.597444	0.766773	0.469649	0.658147	0.463259	0.571885	0.623003	0.434505	0.472843	0.507987	0.607029	0.511182	0.479233	0.482428	0.495208	0.527157	0.651757	0.345048	0.376997	0.5623	0.501597	0.332268	0.357827	0.543131	0.549521	0.479233	0.546326	0.402556	0.546326	0.57508	0.408946
B*40:134	0.616613	0.571885	0.619808	0.600639	0.591054	0.658147	0.607029	0.638978	0.693291	0.648562	0.648562	0.523962	0.623003	0.696486	0.623003	0.648562	0.58147	0.533546	0.648562	0.750799	0.469649	0.642173	0.447284	0.555911	0.607029	0.41853	0.463259	0.492013	0.591054	0.495208	0.463259	0.466454	0.479233	0.549521	0.674121	0.367412	0.399361	0.584665	0.523962	0.354633	0.373802	0.565495	0.571885	0.501597	0.56869	0.42492	0.56869	0.597444	0.43131
B*40:140	0.559105	0.514377	0.5623	0.559105	0.533546	0.600639	0.549521	0.58147	0.642173	0.591054	0.597444	0.466454	0.565495	0.638978	0.565495	0.591054	0.523962	0.607029	0.594249	0.693291	0.543131	0.584665	0.520767	0.498403	0.549521	0.492013	0.539936	0.565495	0.533546	0.56869	0.536741	0.539936	0.552716	0.492013	0.616613	0.440895	0.472843	0.527157	0.466454	0.428115	0.453674	0.507987	0.514377	0.444089	0.511182	0.498403	0.511182	0.539936	0.504792
B*40:148	0.546326	0.501597	0.549521	0.530351	0.5623	0.587859	0.536741	0.607029	0.629393	0.616613	0.584665	0.453674	0.591054	0.626198	0.552716	0.578275	0.511182	0.463259	0.511182	0.680511	0.383387	0.571885	0.376997	0.536741	0.5623	0.348243	0.386581	0.421725	0.559105	0.42492	0.392971	0.396166	0.408946	0.549521	0.674121	0.367412	0.399361	0.492013	0.565495	0.354633	0.421725	0.565495	0.520767	0.501597	0.56869	0.42492	0.56869	0.597444	0.43131
B*40:159	0.607029	0.5623	0.610224	0.603834	0.623003	0.58147	0.597444	0.667732	0.690096	0.677316	0.645367	0.514377	0.651757	0.686901	0.613419	0.638978	0.571885	0.466454	0.571885	0.741214	0.456869	0.632588	0.4377	0.546326	0.597444	0.421725	0.447284	0.495208	0.619808	0.482428	0.453674	0.456869	0.469649	0.571885	0.696486	0.389776	0.408946	0.514377	0.587859	0.376997	0.444089	0.587859	0.594249	0.523962	0.591054	0.447284	0.591054	0.539936	0.453674
B*41:01	0.530351	0.485623	0.501597	0.530351	0.504792	0.571885	0.520767	0.549521	0.613419	0.559105	0.56869	0.4377	0.533546	0.58147	0.536741	0.5623	0.536741	0.626198	0.523962	0.664537	0.546326	0.555911	0.536741	0.511182	0.520767	0.552716	0.555911	0.584665	0.504792	0.587859	0.555911	0.559105	0.571885	0.348243	0.472843	0.345048	0.376997	0.306709	0.322684	0.405751	0.357827	0.364217	0.402556	0.300319	0.367412	0.402556	0.367412	0.396166	0.408946
B*41:02	0.485623	0.440895	0.456869	0.485623	0.501597	0.527157	0.476038	0.549521	0.56869	0.559105	0.523962	0.392971	0.533546	0.536741	0.492013	0.517572	0.492013	0.58147	0.479233	0.619808	0.501597	0.511182	0.492013	0.466454	0.476038	0.507987	0.511182	0.539936	0.460064	0.543131	0.511182	0.514377	0.527157	0.303514	0.428115	0.300319	0.332268	0.338658	0.319489	0.361022	0.354633	0.319489	0.357827	0.255591	0.322684	0.357827	0.322684	0.351438	0.364217
B*41:03	0.501597	0.456869	0.472843	0.501597	0.476038	0.543131	0.492013	0.523962	0.584665	0.533546	0.539936	0.408946	0.507987	0.552716	0.507987	0.533546	0.507987	0.597444	0.495208	0.635783	0.517572	0.527157	0.507987	0.482428	0.492013	0.523962	0.527157	0.555911	0.476038	0.559105	0.527157	0.530351	0.543131	0.319489	0.444089	0.316294	0.348243	0.354633	0.29393	0.376997	0.329073	0.335463	0.373802	0.271565	0.338658	0.373802	0.338658	0.367412	0.380192
B*41:04	0.495208	0.450479	0.466454	0.507987	0.511182	0.536741	0.485623	0.523962	0.578275	0.56869	0.533546	0.402556	0.543131	0.546326	0.501597	0.527157	0.501597	0.591054	0.488818	0.629393	0.523962	0.520767	0.501597	0.476038	0.485623	0.530351	0.520767	0.5623	0.469649	0.565495	0.520767	0.523962	0.536741	0.325879	0.450479	0.322684	0.341853	0.361022	0.341853	0.383387	0.376997	0.341853	0.380192	0.277955	0.345048	0.380192	0.345048	0.361022	0.386581
B*41:07	0.546326	0.501597	0.517572	0.546326	0.520767	0.587859	0.536741	0.530351	0.629393	0.57508	0.584665	0.453674	0.549521	0.597444	0.552716	0.578275	0.552716	0.642173	0.539936	0.680511	0.5623	0.571885	0.552716	0.527157	0.536741	0.56869	0.571885	0.600639	0.520767	0.603834	0.571885	0.57508	0.587859	0.364217	0.488818	0.361022	0.392971	0.322684	0.338658	0.421725	0.373802	0.380192	0.41853	0.316294	0.383387	0.41853	0.383387	0.412141	0.42492
B*41:14	0.642173	0.597444	0.613419	0.626198	0.616613	0.683706	0.632588	0.661342	0.72524	0.670927	0.680511	0.549521	0.645367	0.693291	0.648562	0.616613	0.648562	0.559105	0.635783	0.776358	0.479233	0.667732	0.469649	0.623003	0.632588	0.485623	0.488818	0.517572	0.616613	0.520767	0.488818	0.492013	0.504792	0.460064	0.584665	0.277955	0.309904	0.41853	0.434505	0.338658	0.290735	0.476038	0.514377	0.412141	0.479233	0.335463	0.479233	0.507987	0.341853
B*42:01	0.172524	0.214058	0.14377	0.172524	0.188498	0.214058	0.204473	0.236422	0.303514	0.246006	0.210863	0.249201	0.220447	0.223642	0.178914	0.204473	0.178914	0.392971	0.166134	0.306709	0.313099	0.198083	0.303514	0.153355	0.162939	0.319489	0.322684	0.351438	0.185304	0.354633	0.332268	0.325879	0.338658	0.198083	0.322684	0.370607	0.351438	0.233227	0.214058	0.380192	0.373802	0.214058	0.252396	0.233227	0.217252	0.376997	0.217252	0.246006	0.383387
B*42:02	0.204473	0.246006	0.175719	0.204473	0.220447	0.246006	0.236422	0.268371	0.335463	0.277955	0.242812	0.28115	0.252396	0.255591	0.210863	0.236422	0.210863	0.42492	0.198083	0.338658	0.345048	0.230032	0.335463	0.185304	0.194888	0.351438	0.354633	0.383387	0.217252	0.386581	0.364217	0.357827	0.370607	0.182109	0.306709	0.354633	0.335463	0.217252	0.198083	0.364217	0.357827	0.198083	0.236422	0.217252	0.201278	0.361022	0.201278	0.230032	0.367412
B*42:05	0.153355	0.194888	0.124601	0.153355	0.169329	0.194888	0.185304	0.217252	0.284345	0.226837	0.191693	0.230032	0.201278	0.204473	0.159744	0.185304	0.159744	0.373802	0.185304	0.28754	0.309904	0.178914	0.284345	0.134185	0.14377	0.300319	0.303514	0.332268	0.166134	0.335463	0.313099	0.306709	0.319489	0.217252	0.341853	0.389776	0.370607	0.252396	0.233227	0.399361	0.392971	0.233227	0.271565	0.252396	0.236422	0.396166	0.236422	0.265176	0.402556
B*42:09	0.386581	0.428115	0.357827	0.383387	0.402556	0.361022	0.41853	0.450479	0.517572	0.460064	0.42492	0.463259	0.434505	0.4377	0.392971	0.41853	0.392971	0.246006	0.380192	0.520767	0.236422	0.412141	0.214058	0.367412	0.376997	0.242812	0.233227	0.27476	0.399361	0.261981	0.242812	0.236422	0.249201	0.376997	0.501597	0.246006	0.214058	0.412141	0.392971	0.255591	0.249201	0.392971	0.43131	0.412141	0.396166	0.252396	0.396166	0.345048	0.258786
B*42:13	0.367412	0.408946	0.338658	0.351438	0.341853	0.408946	0.399361	0.322684	0.498403	0.332268	0.405751	0.444089	0.306709	0.41853	0.373802	0.399361	0.373802	0.284345	0.361022	0.501597	0.204473	0.392971	0.194888	0.348243	0.357827	0.210863	0.214058	0.242812	0.380192	0.246006	0.223642	0.217252	0.230032	0.392971	0.517572	0.261981	0.242812	0.42492	0.367412	0.271565	0.223642	0.408946	0.447284	0.428115	0.412141	0.268371	0.412141	0.440895	0.27476
B*44:02	0.86901	0.824281	0.840256	0.881789	0.84345	0.853035	0.859425	0.824281	0.952077	0.776358	0.907348	0.776358	0.808307	0.811502	0.875399	0.900958	0.875399	0.731629	0.833866	0.760383	0.805112	0.894569	0.798722	0.84984	0.859425	0.811502	0.795527	0.84345	0.84345	0.779553	0.801917	0.805112	0.817891	0.763578	0.638978	0.667732	0.686901	0.795527	0.738019	0.728435	0.680511	0.779553	0.817891	0.715655	0.757188	0.693291	0.782748	0.741214	0.731629
B*44:03	0.872204	0.827476	0.875399	0.884984	0.846645	0.85623	0.86262	0.827476	0.955272	0.779553	0.910543	0.779553	0.811502	0.814696	0.878594	0.904153	0.837061	0.734824	0.837061	0.763578	0.808307	0.897764	0.760383	0.811502	0.86262	0.773163	0.798722	0.846645	0.846645	0.782748	0.805112	0.808307	0.821086	0.798722	0.674121	0.702875	0.722045	0.830671	0.773163	0.690096	0.715655	0.814696	0.821086	0.750799	0.792332	0.728435	0.817891	0.776358	0.766773
B*44:04	0.824281	0.779553	0.859425	0.837061	0.798722	0.808307	0.814696	0.779553	0.907348	0.731629	0.86262	0.731629	0.763578	0.805112	0.830671	0.85623	0.86262	0.686901	0.789137	0.715655	0.760383	0.84984	0.769968	0.837061	0.814696	0.798722	0.750799	0.798722	0.798722	0.734824	0.757188	0.760383	0.773163	0.766773	0.642173	0.670927	0.690096	0.798722	0.741214	0.699681	0.683706	0.782748	0.757188	0.71885	0.760383	0.696486	0.785942	0.744409	0.734824
B*44:05	0.821086	0.776358	0.792332	0.833866	0.795527	0.86262	0.811502	0.776358	0.904153	0.728435	0.859425	0.728435	0.760383	0.763578	0.827476	0.853035	0.827476	0.766773	0.785942	0.71246	0.757188	0.846645	0.750799	0.801917	0.811502	0.763578	0.747604	0.795527	0.795527	0.741214	0.753994	0.757188	0.769968	0.715655	0.591054	0.619808	0.638978	0.747604	0.690096	0.680511	0.632588	0.731629	0.769968	0.667732	0.709265	0.645367	0.734824	0.750799	0.683706
B*44:06	0.811502	0.766773	0.782748	0.824281	0.785942	0.795527	0.846645	0.766773	0.913738	0.71885	0.84984	0.71885	0.750799	0.753994	0.817891	0.84345	0.817891	0.674121	0.776358	0.674121	0.747604	0.837061	0.741214	0.792332	0.801917	0.753994	0.738019	0.785942	0.785942	0.722045	0.744409	0.747604	0.760383	0.693291	0.57508	0.661342	0.616613	0.72524	0.667732	0.658147	0.610224	0.709265	0.747604	0.645367	0.686901	0.623003	0.71246	0.670927	0.661342
B*44:07	0.86262	0.817891	0.865815	0.875399	0.837061	0.846645	0.853035	0.817891	0.945687	0.769968	0.900958	0.769968	0.801917	0.805112	0.86901	0.894569	0.827476	0.72524	0.827476	0.753994	0.798722	0.888179	0.750799	0.801917	0.853035	0.763578	0.789137	0.837061	0.837061	0.773163	0.795527	0.798722	0.811502	0.789137	0.664537	0.693291	0.71246	0.821086	0.763578	0.680511	0.70607	0.805112	0.811502	0.741214	0.782748	0.71885	0.808307	0.766773	0.757188
B*44:08	0.884984	0.840256	0.85623	0.897764	0.859425	0.86901	0.875399	0.840256	0.961661	0.792332	0.923323	0.792332	0.824281	0.827476	0.891374	0.916933	0.891374	0.747604	0.84984	0.776358	0.821086	0.910543	0.814696	0.865815	0.875399	0.827476	0.811502	0.859425	0.859425	0.795527	0.817891	0.821086	0.833866	0.779553	0.654952	0.683706	0.702875	0.811502	0.753994	0.744409	0.696486	0.795527	0.833866	0.731629	0.773163	0.709265	0.798722	0.757188	0.747604
B*44:09	0.744409	0.699681	0.715655	0.757188	0.71885	0.728435	0.734824	0.699681	0.827476	0.651757	0.782748	0.651757	0.683706	0.686901	0.750799	0.776358	0.750799	0.607029	0.709265	0.878594	0.680511	0.769968	0.674121	0.72524	0.734824	0.686901	0.670927	0.71885	0.71885	0.654952	0.677316	0.680511	0.693291	0.638978	0.763578	0.543131	0.5623	0.670927	0.613419	0.603834	0.555911	0.654952	0.693291	0.591054	0.658147	0.600639	0.658147	0.616613	0.607029
B*44:10	0.875399	0.830671	0.878594	0.875399	0.84984	0.878594	0.865815	0.795527	0.958466	0.840256	0.913738	0.782748	0.814696	0.817891	0.881789	0.907348	0.840256	0.840256	0.840256	0.766773	0.798722	0.900958	0.763578	0.814696	0.865815	0.763578	0.801917	0.837061	0.84984	0.814696	0.808307	0.811502	0.824281	0.789137	0.664537	0.693291	0.72524	0.821086	0.763578	0.680511	0.70607	0.805112	0.811502	0.741214	0.782748	0.71885	0.808307	0.798722	0.757188
B*44:12	0.85623	0.811502	0.827476	0.86901	0.830671	0.840256	0.846645	0.811502	0.964856	0.763578	0.894569	0.763578	0.795527	0.798722	0.86262	0.888179	0.86262	0.71885	0.821086	0.747604	0.792332	0.881789	0.785942	0.837061	0.846645	0.798722	0.782748	0.830671	0.830671	0.766773	0.789137	0.792332	0.805112	0.750799	0.626198	0.654952	0.674121	0.782748	0.72524	0.715655	0.667732	0.766773	0.805112	0.702875	0.744409	0.680511	0.769968	0.728435	0.71885
B*44:15	0.86901	0.824281	0.840256	0.853035	0.84345	0.872204	0.859425	0.853035	0.952077	0.840256	0.907348	0.776358	0.872204	0.811502	0.875399	0.900958	0.875399	0.782748	0.833866	0.782748	0.798722	0.894569	0.805112	0.84984	0.859425	0.805112	0.801917	0.837061	0.84345	0.757188	0.808307	0.811502	0.824281	0.702875	0.600639	0.613419	0.645367	0.661342	0.677316	0.674121	0.626198	0.71885	0.757188	0.654952	0.696486	0.638978	0.722045	0.71246	0.677316
B*44:18	0.888179	0.84345	0.859425	0.872204	0.86262	0.891374	0.878594	0.872204	0.971246	0.859425	0.926518	0.795527	0.891374	0.830671	0.894569	0.920128	0.894569	0.801917	0.853035	0.750799	0.817891	0.913738	0.824281	0.86901	0.878594	0.824281	0.821086	0.85623	0.86262	0.776358	0.827476	0.830671	0.84345	0.722045	0.603834	0.632588	0.664537	0.680511	0.696486	0.693291	0.645367	0.738019	0.776358	0.674121	0.715655	0.658147	0.741214	0.731629	0.696486
B*44:21	0.837061	0.792332	0.808307	0.84984	0.811502	0.821086	0.827476	0.792332	0.920128	0.744409	0.875399	0.744409	0.776358	0.846645	0.84345	0.86901	0.84345	0.699681	0.801917	0.728435	0.773163	0.86262	0.795527	0.817891	0.827476	0.779553	0.763578	0.811502	0.811502	0.747604	0.769968	0.773163	0.785942	0.760383	0.635783	0.664537	0.683706	0.792332	0.734824	0.72524	0.677316	0.776358	0.814696	0.71246	0.753994	0.690096	0.779553	0.738019	0.728435
B*44:24	0.878594	0.833866	0.84984	0.891374	0.853035	0.86262	0.86901	0.833866	0.945687	0.785942	0.916933	0.785942	0.817891	0.821086	0.884984	0.910543	0.884984	0.741214	0.84345	0.769968	0.814696	0.904153	0.808307	0.859425	0.86901	0.821086	0.805112	0.853035	0.853035	0.789137	0.811502	0.814696	0.827476	0.773163	0.648562	0.677316	0.696486	0.805112	0.747604	0.738019	0.690096	0.789137	0.827476	0.72524	0.766773	0.702875	0.792332	0.750799	0.741214
B*44:25	0.830671	0.785942	0.801917	0.827476	0.805112	0.872204	0.821086	0.785942	0.913738	0.738019	0.86901	0.738019	0.769968	0.773163	0.837061	0.86262	0.837061	0.690096	0.795527	0.693291	0.680511	0.85623	0.674121	0.811502	0.821086	0.686901	0.670927	0.71885	0.805112	0.664537	0.677316	0.680511	0.693291	0.72524	0.607029	0.543131	0.5623	0.757188	0.699681	0.603834	0.555911	0.741214	0.779553	0.677316	0.71885	0.56869	0.744409	0.760383	0.607029
B*44:28	0.833866	0.789137	0.86901	0.830671	0.808307	0.817891	0.824281	0.789137	0.916933	0.741214	0.872204	0.741214	0.773163	0.776358	0.840256	0.865815	0.872204	0.610224	0.798722	0.72524	0.683706	0.859425	0.709265	0.846645	0.824281	0.722045	0.674121	0.722045	0.808307	0.658147	0.680511	0.683706	0.696486	0.792332	0.667732	0.610224	0.629393	0.824281	0.766773	0.638978	0.623003	0.808307	0.782748	0.744409	0.785942	0.635783	0.811502	0.769968	0.674121
B*44:29	0.881789	0.837061	0.884984	0.894569	0.85623	0.865815	0.872204	0.837061	0.964856	0.789137	0.920128	0.789137	0.821086	0.824281	0.888179	0.913738	0.846645	0.744409	0.846645	0.773163	0.817891	0.907348	0.769968	0.821086	0.872204	0.782748	0.808307	0.85623	0.85623	0.792332	0.814696	0.817891	0.830671	0.808307	0.683706	0.71246	0.731629	0.840256	0.782748	0.699681	0.72524	0.824281	0.830671	0.760383	0.801917	0.738019	0.827476	0.785942	0.776358
B*44:30	0.888179	0.84345	0.891374	0.900958	0.86262	0.872204	0.878594	0.84345	0.971246	0.795527	0.926518	0.795527	0.827476	0.830671	0.894569	0.920128	0.853035	0.750799	0.853035	0.779553	0.824281	0.913738	0.776358	0.827476	0.878594	0.789137	0.814696	0.86262	0.86262	0.798722	0.821086	0.824281	0.837061	0.814696	0.690096	0.71885	0.738019	0.846645	0.789137	0.70607	0.731629	0.830671	0.837061	0.766773	0.808307	0.744409	0.833866	0.792332	0.782748
B*44:37	0.824281	0.779553	0.827476	0.837061	0.798722	0.808307	0.814696	0.779553	0.907348	0.731629	0.86262	0.731629	0.763578	0.837061	0.830671	0.85623	0.789137	0.686901	0.789137	0.715655	0.760383	0.84984	0.71246	0.763578	0.814696	0.72524	0.750799	0.798722	0.798722	0.734824	0.757188	0.760383	0.773163	0.750799	0.626198	0.654952	0.674121	0.782748	0.72524	0.642173	0.667732	0.766773	0.773163	0.702875	0.744409	0.680511	0.769968	0.728435	0.71885
B*44:43	0.875399	0.830671	0.878594	0.872204	0.84984	0.84984	0.865815	0.830671	0.958466	0.840256	0.913738	0.782748	0.814696	0.817891	0.881789	0.907348	0.840256	0.734824	0.840256	0.766773	0.72524	0.900958	0.677316	0.814696	0.865815	0.690096	0.715655	0.763578	0.84984	0.750799	0.722045	0.72524	0.738019	0.801917	0.677316	0.619808	0.638978	0.833866	0.776358	0.607029	0.632588	0.817891	0.824281	0.753994	0.795527	0.645367	0.821086	0.769968	0.683706
B*44:47	0.859425	0.814696	0.86262	0.85623	0.875399	0.84345	0.84984	0.920128	0.942492	0.872204	0.897764	0.766773	0.904153	0.801917	0.865815	0.891374	0.824281	0.635783	0.824281	0.750799	0.709265	0.884984	0.661342	0.798722	0.84984	0.674121	0.699681	0.747604	0.833866	0.683706	0.70607	0.709265	0.722045	0.785942	0.661342	0.603834	0.623003	0.728435	0.801917	0.591054	0.658147	0.801917	0.808307	0.738019	0.779553	0.629393	0.805112	0.763578	0.667732
B*44:50	0.881789	0.837061	0.884984	0.894569	0.85623	0.865815	0.872204	0.837061	0.964856	0.789137	0.920128	0.789137	0.821086	0.824281	0.888179	0.913738	0.846645	0.744409	0.846645	0.744409	0.817891	0.907348	0.769968	0.821086	0.872204	0.782748	0.808307	0.85623	0.85623	0.792332	0.814696	0.817891	0.830671	0.808307	0.690096	0.71246	0.731629	0.840256	0.782748	0.699681	0.72524	0.824281	0.830671	0.760383	0.801917	0.738019	0.827476	0.785942	0.776358
B*44:51	0.84984	0.805112	0.821086	0.86262	0.824281	0.833866	0.840256	0.805112	0.932907	0.814696	0.888179	0.757188	0.789137	0.792332	0.85623	0.881789	0.85623	0.699681	0.814696	0.741214	0.715655	0.875399	0.709265	0.830671	0.840256	0.722045	0.70607	0.753994	0.824281	0.747604	0.71246	0.715655	0.728435	0.744409	0.619808	0.578275	0.597444	0.776358	0.71885	0.638978	0.591054	0.760383	0.798722	0.696486	0.738019	0.603834	0.763578	0.722045	0.642173
B*44:60	0.872204	0.827476	0.875399	0.86901	0.846645	0.85623	0.86262	0.827476	0.948882	0.779553	0.910543	0.779553	0.811502	0.814696	0.878594	0.904153	0.837061	0.648562	0.837061	0.763578	0.722045	0.897764	0.674121	0.811502	0.86262	0.686901	0.71246	0.760383	0.846645	0.696486	0.71885	0.722045	0.734824	0.798722	0.674121	0.616613	0.635783	0.830671	0.773163	0.603834	0.629393	0.814696	0.821086	0.750799	0.792332	0.642173	0.817891	0.776358	0.680511
B*44:76	0.808307	0.763578	0.84345	0.805112	0.782748	0.792332	0.798722	0.763578	0.891374	0.715655	0.846645	0.715655	0.747604	0.750799	0.814696	0.840256	0.846645	0.584665	0.773163	0.699681	0.658147	0.833866	0.683706	0.872204	0.824281	0.696486	0.648562	0.696486	0.782748	0.632588	0.654952	0.658147	0.670927	0.817891	0.693291	0.635783	0.654952	0.84984	0.792332	0.664537	0.648562	0.833866	0.757188	0.769968	0.811502	0.661342	0.837061	0.795527	0.699681
B*44:79	0.846645	0.801917	0.84984	0.84345	0.821086	0.830671	0.837061	0.801917	0.929712	0.753994	0.884984	0.753994	0.785942	0.789137	0.853035	0.878594	0.811502	0.623003	0.811502	0.738019	0.696486	0.872204	0.648562	0.837061	0.86262	0.661342	0.686901	0.734824	0.821086	0.670927	0.693291	0.696486	0.709265	0.824281	0.699681	0.642173	0.661342	0.85623	0.798722	0.629393	0.654952	0.840256	0.795527	0.776358	0.817891	0.667732	0.84345	0.801917	0.70607
B*44:83	0.853035	0.808307	0.824281	0.84984	0.827476	0.837061	0.84345	0.808307	0.929712	0.760383	0.891374	0.760383	0.792332	0.795527	0.859425	0.884984	0.859425	0.629393	0.817891	0.744409	0.702875	0.878594	0.696486	0.833866	0.84345	0.709265	0.693291	0.741214	0.827476	0.677316	0.699681	0.702875	0.715655	0.747604	0.623003	0.565495	0.584665	0.779553	0.722045	0.626198	0.578275	0.763578	0.801917	0.699681	0.741214	0.591054	0.766773	0.72524	0.629393
B*44:103	0.881789	0.837061	0.884984	0.878594	0.85623	0.865815	0.872204	0.837061	0.964856	0.789137	0.920128	0.789137	0.821086	0.824281	0.888179	0.913738	0.846645	0.658147	0.846645	0.773163	0.731629	0.907348	0.683706	0.821086	0.872204	0.696486	0.722045	0.769968	0.894569	0.70607	0.728435	0.731629	0.744409	0.817891	0.693291	0.635783	0.654952	0.84984	0.792332	0.623003	0.648562	0.833866	0.840256	0.769968	0.811502	0.661342	0.837061	0.795527	0.699681
B*44:120	0.910543	0.865815	0.913738	0.907348	0.884984	0.894569	0.900958	0.865815	0.99361	0.817891	0.948882	0.817891	0.84984	0.853035	0.916933	0.942492	0.875399	0.686901	0.875399	0.801917	0.760383	0.936102	0.71246	0.84984	0.900958	0.72524	0.750799	0.798722	0.884984	0.734824	0.757188	0.760383	0.773163	0.837061	0.71246	0.654952	0.674121	0.86901	0.811502	0.642173	0.667732	0.853035	0.859425	0.789137	0.830671	0.680511	0.85623	0.814696	0.71885
B*45:01	0.753994	0.709265	0.72524	0.738019	0.728435	0.757188	0.744409	0.738019	0.837061	0.72524	0.792332	0.661342	0.757188	0.696486	0.760383	0.785942	0.760383	0.667732	0.71885	0.888179	0.683706	0.779553	0.690096	0.734824	0.744409	0.690096	0.686901	0.722045	0.728435	0.642173	0.693291	0.696486	0.709265	0.587859	0.71246	0.498403	0.530351	0.546326	0.5623	0.559105	0.511182	0.603834	0.642173	0.539936	0.607029	0.555911	0.607029	0.597444	0.5623
B*45:02	0.731629	0.686901	0.702875	0.715655	0.70607	0.757188	0.722045	0.715655	0.814696	0.702875	0.769968	0.638978	0.734824	0.674121	0.738019	0.763578	0.738019	0.674121	0.696486	0.865815	0.661342	0.757188	0.667732	0.71246	0.722045	0.667732	0.664537	0.699681	0.70607	0.616613	0.670927	0.674121	0.686901	0.565495	0.690096	0.476038	0.507987	0.523962	0.539936	0.536741	0.488818	0.58147	0.619808	0.517572	0.584665	0.533546	0.584665	0.597444	0.539936
B*45:03	0.801917	0.757188	0.773163	0.785942	0.776358	0.805112	0.792332	0.785942	0.884984	0.773163	0.840256	0.709265	0.805112	0.744409	0.808307	0.833866	0.808307	0.623003	0.766773	0.936102	0.638978	0.827476	0.645367	0.782748	0.792332	0.645367	0.642173	0.677316	0.776358	0.597444	0.648562	0.651757	0.664537	0.635783	0.760383	0.453674	0.485623	0.594249	0.610224	0.514377	0.466454	0.651757	0.690096	0.587859	0.654952	0.511182	0.654952	0.645367	0.517572
B*45:09	0.72524	0.680511	0.696486	0.722045	0.699681	0.699681	0.715655	0.709265	0.808307	0.753994	0.763578	0.632588	0.728435	0.667732	0.731629	0.757188	0.731629	0.677316	0.690096	0.859425	0.667732	0.750799	0.661342	0.70607	0.715655	0.674121	0.658147	0.70607	0.699681	0.693291	0.664537	0.667732	0.680511	0.571885	0.696486	0.482428	0.501597	0.530351	0.546326	0.543131	0.495208	0.587859	0.626198	0.523962	0.591054	0.539936	0.591054	0.539936	0.546326
B*46:01	0.520767	0.552716	0.552716	0.517572	0.495208	0.495208	0.552716	0.543131	0.447284	0.552716	0.507987	0.587859	0.527157	0.533546	0.527157	0.552716	0.533546	0.450479	0.485623	0.654952	0.440895	0.546326	0.440895	0.559105	0.536741	0.453674	0.43131	0.479233	0.495208	0.466454	0.4377	0.440895	0.453674	0.619808	0.744409	0.559105	0.527157	0.654952	0.594249	0.514377	0.520767	0.635783	0.5623	0.654952	0.638978	0.565495	0.638978	0.587859	0.571885
B*46:02	0.5623	0.594249	0.594249	0.559105	0.536741	0.536741	0.594249	0.584665	0.488818	0.594249	0.549521	0.613419	0.56869	0.57508	0.56869	0.594249	0.57508	0.421725	0.527157	0.696486	0.412141	0.587859	0.412141	0.600639	0.578275	0.42492	0.402556	0.450479	0.536741	0.4377	0.408946	0.412141	0.42492	0.661342	0.785942	0.530351	0.498403	0.696486	0.635783	0.485623	0.492013	0.677316	0.603834	0.680511	0.680511	0.536741	0.680511	0.629393	0.543131
B*46:08	0.5623	0.594249	0.565495	0.559105	0.536741	0.536741	0.594249	0.584665	0.488818	0.594249	0.549521	0.629393	0.56869	0.57508	0.56869	0.594249	0.527157	0.421725	0.527157	0.696486	0.412141	0.587859	0.364217	0.552716	0.578275	0.376997	0.402556	0.450479	0.536741	0.4377	0.408946	0.412141	0.42492	0.632588	0.757188	0.501597	0.469649	0.667732	0.607029	0.4377	0.463259	0.648562	0.603834	0.667732	0.651757	0.507987	0.651757	0.600639	0.514377
B*46:11	0.603834	0.635783	0.607029	0.587859	0.619808	0.607029	0.635783	0.629393	0.530351	0.674121	0.591054	0.670927	0.648562	0.616613	0.610224	0.635783	0.56869	0.552716	0.56869	0.738019	0.511182	0.629393	0.476038	0.543131	0.594249	0.476038	0.514377	0.549521	0.578275	0.527157	0.520767	0.523962	0.536741	0.610224	0.734824	0.549521	0.530351	0.552716	0.626198	0.485623	0.552716	0.626198	0.632588	0.645367	0.629393	0.555911	0.629393	0.619808	0.5623
B*46:20	0.549521	0.58147	0.58147	0.546326	0.523962	0.523962	0.58147	0.571885	0.476038	0.58147	0.536741	0.616613	0.555911	0.5623	0.555911	0.58147	0.5623	0.408946	0.514377	0.683706	0.399361	0.57508	0.399361	0.587859	0.565495	0.412141	0.389776	0.4377	0.523962	0.42492	0.396166	0.399361	0.412141	0.648562	0.773163	0.517572	0.485623	0.683706	0.623003	0.472843	0.479233	0.664537	0.591054	0.683706	0.667732	0.523962	0.667732	0.616613	0.530351
B*46:22	0.559105	0.578275	0.591054	0.555911	0.533546	0.533546	0.591054	0.58147	0.485623	0.591054	0.546326	0.613419	0.565495	0.571885	0.565495	0.591054	0.571885	0.41853	0.523962	0.693291	0.408946	0.584665	0.408946	0.597444	0.57508	0.421725	0.399361	0.447284	0.533546	0.434505	0.405751	0.408946	0.421725	0.645367	0.769968	0.514377	0.482428	0.680511	0.619808	0.469649	0.476038	0.661342	0.587859	0.680511	0.664537	0.520767	0.664537	0.613419	0.527157
B*46:23	0.530351	0.5623	0.5623	0.527157	0.504792	0.504792	0.5623	0.552716	0.456869	0.5623	0.517572	0.597444	0.536741	0.543131	0.536741	0.5623	0.543131	0.460064	0.495208	0.664537	0.450479	0.555911	0.450479	0.56869	0.546326	0.463259	0.440895	0.488818	0.504792	0.476038	0.447284	0.450479	0.463259	0.629393	0.753994	0.56869	0.536741	0.664537	0.603834	0.523962	0.530351	0.645367	0.571885	0.664537	0.648562	0.57508	0.648562	0.597444	0.58147
B*46:27	0.565495	0.597444	0.597444	0.5623	0.539936	0.539936	0.597444	0.587859	0.492013	0.597444	0.552716	0.632588	0.571885	0.578275	0.571885	0.597444	0.578275	0.42492	0.530351	0.699681	0.415335	0.591054	0.415335	0.603834	0.58147	0.428115	0.405751	0.453674	0.539936	0.440895	0.412141	0.415335	0.428115	0.664537	0.789137	0.533546	0.501597	0.699681	0.638978	0.488818	0.495208	0.680511	0.607029	0.699681	0.683706	0.539936	0.683706	0.632588	0.546326
B*47:01	0.785942	0.741214	0.789137	0.782748	0.760383	0.769968	0.776358	0.808307	0.86901	0.760383	0.824281	0.693291	0.792332	0.865815	0.792332	0.817891	0.750799	0.648562	0.750799	0.728435	0.70607	0.811502	0.702875	0.72524	0.776358	0.670927	0.71246	0.744409	0.760383	0.680511	0.71885	0.722045	0.734824	0.72524	0.651757	0.629393	0.664537	0.760383	0.699681	0.616613	0.642173	0.741214	0.747604	0.677316	0.71885	0.654952	0.744409	0.71885	0.693291
B*47:02	0.683706	0.638978	0.686901	0.680511	0.658147	0.667732	0.674121	0.70607	0.766773	0.658147	0.722045	0.591054	0.690096	0.763578	0.690096	0.715655	0.648562	0.546326	0.648562	0.817891	0.603834	0.709265	0.600639	0.623003	0.674121	0.56869	0.610224	0.642173	0.658147	0.578275	0.616613	0.619808	0.632588	0.623003	0.747604	0.527157	0.5623	0.658147	0.597444	0.514377	0.539936	0.638978	0.645367	0.57508	0.642173	0.584665	0.642173	0.616613	0.591054
B*47:03	0.753994	0.709265	0.757188	0.750799	0.728435	0.738019	0.744409	0.776358	0.837061	0.728435	0.792332	0.661342	0.760383	0.833866	0.760383	0.785942	0.71885	0.616613	0.71885	0.744409	0.674121	0.779553	0.670927	0.693291	0.744409	0.638978	0.680511	0.71246	0.728435	0.648562	0.686901	0.690096	0.702875	0.693291	0.674121	0.597444	0.632588	0.728435	0.667732	0.584665	0.610224	0.709265	0.715655	0.645367	0.686901	0.623003	0.71246	0.686901	0.661342
B*47:05	0.750799	0.70607	0.753994	0.731629	0.760383	0.734824	0.741214	0.808307	0.833866	0.760383	0.789137	0.658147	0.792332	0.830671	0.757188	0.782748	0.715655	0.527157	0.715655	0.693291	0.584665	0.776358	0.58147	0.690096	0.741214	0.549521	0.591054	0.623003	0.72524	0.559105	0.597444	0.600639	0.613419	0.690096	0.616613	0.507987	0.543131	0.722045	0.699681	0.495208	0.555911	0.70607	0.71246	0.642173	0.683706	0.533546	0.709265	0.683706	0.571885
B*48:01	0.332268	0.28754	0.335463	0.332268	0.348243	0.373802	0.322684	0.396166	0.428115	0.405751	0.370607	0.239617	0.380192	0.412141	0.338658	0.364217	0.297125	0.552716	0.364217	0.466454	0.488818	0.357827	0.466454	0.271565	0.322684	0.4377	0.482428	0.511182	0.345048	0.514377	0.482428	0.485623	0.498403	0.370607	0.495208	0.492013	0.523962	0.405751	0.386581	0.479233	0.546326	0.386581	0.392971	0.322684	0.389776	0.549521	0.389776	0.41853	0.555911
B*48:02	0.511182	0.466454	0.514377	0.507987	0.485623	0.485623	0.501597	0.43131	0.607029	0.476038	0.549521	0.41853	0.450479	0.523962	0.517572	0.543131	0.476038	0.587859	0.476038	0.645367	0.578275	0.536741	0.530351	0.450479	0.501597	0.543131	0.56869	0.616613	0.523962	0.603834	0.57508	0.578275	0.591054	0.495208	0.619808	0.530351	0.549521	0.527157	0.469649	0.517572	0.543131	0.511182	0.517572	0.447284	0.514377	0.587859	0.514377	0.463259	0.594249
B*48:03	0.348243	0.303514	0.351438	0.348243	0.322684	0.389776	0.338658	0.370607	0.444089	0.380192	0.386581	0.255591	0.354633	0.428115	0.354633	0.380192	0.313099	0.56869	0.380192	0.482428	0.504792	0.373802	0.482428	0.28754	0.338658	0.453674	0.498403	0.527157	0.361022	0.530351	0.498403	0.501597	0.514377	0.386581	0.511182	0.507987	0.539936	0.421725	0.361022	0.495208	0.520767	0.402556	0.408946	0.338658	0.405751	0.565495	0.405751	0.434505	0.571885
B*48:04	0.364217	0.319489	0.367412	0.364217	0.380192	0.405751	0.354633	0.428115	0.460064	0.4377	0.402556	0.271565	0.412141	0.444089	0.370607	0.396166	0.329073	0.584665	0.329073	0.498403	0.504792	0.389776	0.498403	0.303514	0.354633	0.469649	0.507987	0.543131	0.376997	0.546326	0.514377	0.517572	0.530351	0.364217	0.488818	0.485623	0.517572	0.399361	0.380192	0.472843	0.539936	0.380192	0.386581	0.316294	0.383387	0.543131	0.383387	0.412141	0.549521
B*48:05	0.207668	0.162939	0.242812	0.191693	0.223642	0.249201	0.198083	0.271565	0.303514	0.28115	0.246006	0.115016	0.255591	0.28754	0.214058	0.239617	0.246006	0.412141	0.239617	0.341853	0.348243	0.233227	0.399361	0.271565	0.223642	0.370607	0.341853	0.370607	0.220447	0.373802	0.341853	0.345048	0.357827	0.329073	0.453674	0.434505	0.466454	0.364217	0.345048	0.463259	0.488818	0.345048	0.268371	0.28115	0.348243	0.492013	0.348243	0.376997	0.498403
B*48:06	0.29393	0.249201	0.297125	0.29393	0.309904	0.335463	0.329073	0.357827	0.415335	0.367412	0.332268	0.201278	0.341853	0.373802	0.300319	0.325879	0.258786	0.514377	0.325879	0.428115	0.450479	0.319489	0.428115	0.233227	0.284345	0.399361	0.444089	0.472843	0.306709	0.476038	0.444089	0.447284	0.460064	0.319489	0.444089	0.504792	0.472843	0.354633	0.335463	0.428115	0.495208	0.335463	0.341853	0.271565	0.338658	0.498403	0.338658	0.367412	0.504792
B*48:07	0.348243	0.303514	0.351438	0.348243	0.364217	0.373802	0.338658	0.412141	0.444089	0.421725	0.386581	0.255591	0.396166	0.428115	0.354633	0.380192	0.313099	0.559105	0.380192	0.482428	0.504792	0.373802	0.482428	0.28754	0.338658	0.453674	0.498403	0.527157	0.361022	0.501597	0.498403	0.501597	0.514377	0.386581	0.511182	0.507987	0.539936	0.421725	0.402556	0.495208	0.5623	0.402556	0.408946	0.338658	0.405751	0.565495	0.405751	0.41853	0.571885
B*48:10	0.421725	0.376997	0.42492	0.405751	0.4377	0.463259	0.412141	0.485623	0.517572	0.495208	0.460064	0.329073	0.469649	0.501597	0.428115	0.453674	0.386581	0.338658	0.453674	0.555911	0.27476	0.447284	0.252396	0.361022	0.412141	0.223642	0.268371	0.297125	0.434505	0.300319	0.268371	0.271565	0.284345	0.460064	0.584665	0.277955	0.309904	0.495208	0.476038	0.265176	0.332268	0.476038	0.482428	0.412141	0.479233	0.335463	0.479233	0.507987	0.341853
B*48:12	0.332268	0.28754	0.335463	0.332268	0.348243	0.373802	0.322684	0.396166	0.428115	0.405751	0.370607	0.239617	0.380192	0.412141	0.338658	0.364217	0.297125	0.504792	0.364217	0.466454	0.440895	0.357827	0.41853	0.271565	0.322684	0.389776	0.434505	0.463259	0.345048	0.466454	0.434505	0.4377	0.450479	0.370607	0.495208	0.444089	0.476038	0.405751	0.386581	0.43131	0.498403	0.386581	0.392971	0.322684	0.389776	0.501597	0.389776	0.41853	0.507987
B*48:13	0.297125	0.252396	0.300319	0.297125	0.313099	0.338658	0.28754	0.361022	0.392971	0.370607	0.335463	0.204473	0.345048	0.376997	0.303514	0.329073	0.261981	0.517572	0.261981	0.43131	0.4377	0.322684	0.43131	0.236422	0.28754	0.402556	0.440895	0.476038	0.309904	0.479233	0.447284	0.450479	0.463259	0.297125	0.421725	0.41853	0.450479	0.332268	0.313099	0.405751	0.472843	0.313099	0.319489	0.249201	0.316294	0.476038	0.316294	0.345048	0.482428
B*48:15	0.444089	0.399361	0.447284	0.428115	0.460064	0.485623	0.434505	0.507987	0.539936	0.517572	0.482428	0.351438	0.492013	0.523962	0.450479	0.476038	0.408946	0.361022	0.476038	0.578275	0.297125	0.469649	0.27476	0.434505	0.460064	0.246006	0.290735	0.319489	0.456869	0.322684	0.290735	0.29393	0.306709	0.533546	0.658147	0.351438	0.383387	0.56869	0.549521	0.338658	0.405751	0.549521	0.504792	0.485623	0.552716	0.408946	0.552716	0.58147	0.415335
B*48:24	0.511182	0.466454	0.514377	0.495208	0.527157	0.552716	0.501597	0.57508	0.607029	0.584665	0.549521	0.41853	0.559105	0.591054	0.517572	0.543131	0.476038	0.428115	0.476038	0.645367	0.348243	0.536741	0.341853	0.450479	0.501597	0.313099	0.351438	0.386581	0.523962	0.389776	0.357827	0.361022	0.373802	0.511182	0.635783	0.329073	0.361022	0.546326	0.527157	0.316294	0.383387	0.527157	0.533546	0.463259	0.530351	0.386581	0.530351	0.559105	0.392971
B*49:01	0.817891	0.773163	0.821086	0.801917	0.792332	0.821086	0.808307	0.801917	0.900958	0.789137	0.85623	0.72524	0.821086	0.830671	0.824281	0.84984	0.782748	0.731629	0.782748	0.680511	0.747604	0.84345	0.71246	0.808307	0.833866	0.71246	0.750799	0.785942	0.792332	0.70607	0.757188	0.760383	0.773163	0.734824	0.616613	0.645367	0.677316	0.693291	0.709265	0.632588	0.658147	0.750799	0.70607	0.686901	0.728435	0.670927	0.753994	0.744409	0.709265
B*50:01	0.683706	0.638978	0.686901	0.667732	0.658147	0.686901	0.674121	0.667732	0.766773	0.654952	0.722045	0.591054	0.686901	0.696486	0.690096	0.715655	0.648562	0.597444	0.648562	0.817891	0.613419	0.709265	0.578275	0.674121	0.699681	0.578275	0.616613	0.651757	0.658147	0.571885	0.623003	0.626198	0.638978	0.600639	0.72524	0.511182	0.543131	0.559105	0.57508	0.498403	0.523962	0.616613	0.571885	0.552716	0.619808	0.56869	0.619808	0.610224	0.57508
B*50:02	0.731629	0.686901	0.734824	0.715655	0.70607	0.734824	0.722045	0.715655	0.814696	0.702875	0.769968	0.638978	0.734824	0.674121	0.738019	0.763578	0.696486	0.645367	0.696486	0.865815	0.661342	0.757188	0.626198	0.722045	0.747604	0.626198	0.664537	0.699681	0.70607	0.619808	0.670927	0.674121	0.686901	0.648562	0.773163	0.559105	0.591054	0.607029	0.623003	0.546326	0.571885	0.664537	0.619808	0.600639	0.667732	0.616613	0.667732	0.658147	0.623003
B*50:04	0.667732	0.623003	0.670927	0.651757	0.642173	0.670927	0.658147	0.686901	0.750799	0.638978	0.70607	0.57508	0.670927	0.680511	0.674121	0.699681	0.632588	0.58147	0.632588	0.801917	0.597444	0.693291	0.5623	0.658147	0.683706	0.5623	0.600639	0.635783	0.642173	0.555911	0.607029	0.610224	0.623003	0.584665	0.709265	0.495208	0.527157	0.543131	0.559105	0.482428	0.507987	0.600639	0.555911	0.536741	0.603834	0.552716	0.603834	0.594249	0.559105
B*51:01	0.722045	0.677316	0.72524	0.70607	0.738019	0.763578	0.757188	0.782748	0.824281	0.792332	0.760383	0.629393	0.766773	0.734824	0.728435	0.753994	0.686901	0.638978	0.686901	0.584665	0.559105	0.747604	0.523962	0.71246	0.738019	0.523962	0.5623	0.597444	0.696486	0.600639	0.56869	0.571885	0.584665	0.674121	0.555911	0.555911	0.523962	0.616613	0.690096	0.479233	0.546326	0.690096	0.645367	0.626198	0.667732	0.517572	0.693291	0.722045	0.555911
B*51:02	0.690096	0.645367	0.693291	0.674121	0.70607	0.731629	0.72524	0.750799	0.792332	0.760383	0.728435	0.597444	0.734824	0.702875	0.696486	0.722045	0.654952	0.607029	0.654952	0.552716	0.527157	0.715655	0.492013	0.680511	0.70607	0.492013	0.530351	0.565495	0.664537	0.56869	0.536741	0.539936	0.552716	0.642173	0.523962	0.523962	0.492013	0.584665	0.658147	0.447284	0.514377	0.658147	0.613419	0.594249	0.635783	0.485623	0.661342	0.690096	0.523962
B*51:04	0.734824	0.690096	0.738019	0.71885	0.709265	0.776358	0.769968	0.690096	0.837061	0.699681	0.773163	0.642173	0.674121	0.747604	0.741214	0.766773	0.699681	0.651757	0.699681	0.597444	0.571885	0.760383	0.536741	0.72524	0.750799	0.536741	0.57508	0.610224	0.709265	0.613419	0.58147	0.584665	0.597444	0.686901	0.56869	0.56869	0.536741	0.71885	0.661342	0.492013	0.517572	0.702875	0.658147	0.638978	0.680511	0.530351	0.70607	0.734824	0.56869
B*51:05	0.677316	0.632588	0.71246	0.661342	0.693291	0.71885	0.71246	0.738019	0.779553	0.747604	0.715655	0.584665	0.722045	0.690096	0.683706	0.709265	0.715655	0.594249	0.642173	0.539936	0.514377	0.702875	0.552716	0.690096	0.667732	0.552716	0.517572	0.552716	0.651757	0.555911	0.523962	0.527157	0.539936	0.610224	0.492013	0.492013	0.460064	0.552716	0.626198	0.456869	0.482428	0.626198	0.600639	0.5623	0.603834	0.453674	0.629393	0.658147	0.492013
B*51:06	0.702875	0.658147	0.70607	0.686901	0.677316	0.744409	0.738019	0.72524	0.805112	0.734824	0.741214	0.610224	0.709265	0.715655	0.709265	0.734824	0.667732	0.619808	0.667732	0.565495	0.539936	0.728435	0.504792	0.693291	0.71885	0.504792	0.543131	0.578275	0.677316	0.58147	0.549521	0.552716	0.565495	0.654952	0.536741	0.536741	0.504792	0.690096	0.629393	0.460064	0.485623	0.670927	0.626198	0.607029	0.648562	0.498403	0.674121	0.702875	0.536741
B*51:07	0.747604	0.702875	0.750799	0.731629	0.763578	0.789137	0.738019	0.808307	0.84984	0.817891	0.785942	0.654952	0.792332	0.760383	0.753994	0.779553	0.71246	0.664537	0.71246	0.610224	0.584665	0.773163	0.549521	0.738019	0.763578	0.549521	0.587859	0.623003	0.722045	0.626198	0.594249	0.597444	0.610224	0.71246	0.594249	0.530351	0.5623	0.654952	0.728435	0.517572	0.584665	0.728435	0.683706	0.664537	0.70607	0.555911	0.731629	0.760383	0.594249
B*51:08	0.744409	0.699681	0.715655	0.728435	0.760383	0.785942	0.779553	0.805112	0.846645	0.814696	0.782748	0.651757	0.789137	0.757188	0.750799	0.776358	0.750799	0.661342	0.709265	0.607029	0.58147	0.769968	0.587859	0.72524	0.734824	0.587859	0.584665	0.619808	0.71885	0.623003	0.591054	0.594249	0.607029	0.613419	0.495208	0.495208	0.463259	0.555911	0.629393	0.492013	0.485623	0.629393	0.667732	0.565495	0.607029	0.456869	0.632588	0.661342	0.495208
B*51:09	0.747604	0.702875	0.750799	0.731629	0.763578	0.789137	0.782748	0.808307	0.84984	0.817891	0.785942	0.654952	0.792332	0.760383	0.753994	0.779553	0.71246	0.664537	0.71246	0.610224	0.584665	0.773163	0.549521	0.686901	0.738019	0.549521	0.587859	0.623003	0.722045	0.626198	0.594249	0.597444	0.610224	0.648562	0.530351	0.530351	0.498403	0.591054	0.664537	0.453674	0.520767	0.664537	0.670927	0.600639	0.642173	0.492013	0.667732	0.696486	0.530351
B*51:10	0.610224	0.565495	0.613419	0.610224	0.626198	0.651757	0.645367	0.670927	0.71246	0.680511	0.648562	0.517572	0.654952	0.690096	0.616613	0.642173	0.57508	0.613419	0.57508	0.472843	0.533546	0.635783	0.527157	0.549521	0.600639	0.498403	0.536741	0.571885	0.584665	0.57508	0.543131	0.546326	0.559105	0.539936	0.421725	0.507987	0.476038	0.482428	0.555911	0.43131	0.498403	0.555911	0.5623	0.492013	0.533546	0.469649	0.559105	0.587859	0.507987
B*51:13	0.738019	0.693291	0.741214	0.722045	0.753994	0.763578	0.773163	0.798722	0.840256	0.808307	0.776358	0.645367	0.782748	0.750799	0.744409	0.769968	0.702875	0.645367	0.702875	0.600639	0.57508	0.763578	0.539936	0.728435	0.753994	0.539936	0.578275	0.613419	0.71246	0.587859	0.584665	0.587859	0.600639	0.690096	0.571885	0.571885	0.539936	0.632588	0.70607	0.495208	0.5623	0.70607	0.661342	0.642173	0.683706	0.533546	0.709265	0.722045	0.571885
B*51:14	0.734824	0.690096	0.738019	0.71885	0.750799	0.776358	0.769968	0.795527	0.837061	0.805112	0.773163	0.642173	0.779553	0.747604	0.741214	0.766773	0.699681	0.651757	0.699681	0.597444	0.571885	0.760383	0.536741	0.72524	0.750799	0.536741	0.57508	0.610224	0.709265	0.613419	0.58147	0.584665	0.597444	0.686901	0.56869	0.56869	0.536741	0.629393	0.702875	0.492013	0.559105	0.702875	0.658147	0.638978	0.680511	0.530351	0.70607	0.734824	0.56869
B*51:15	0.741214	0.696486	0.744409	0.72524	0.757188	0.744409	0.776358	0.766773	0.84345	0.811502	0.779553	0.648562	0.785942	0.753994	0.747604	0.773163	0.70607	0.619808	0.70607	0.603834	0.578275	0.766773	0.543131	0.680511	0.731629	0.543131	0.58147	0.616613	0.715655	0.594249	0.587859	0.591054	0.603834	0.642173	0.523962	0.523962	0.492013	0.584665	0.658147	0.447284	0.514377	0.658147	0.664537	0.594249	0.635783	0.485623	0.661342	0.651757	0.523962
B*51:17	0.747604	0.702875	0.750799	0.731629	0.763578	0.789137	0.782748	0.808307	0.84984	0.760383	0.785942	0.654952	0.792332	0.760383	0.753994	0.779553	0.71246	0.607029	0.71246	0.610224	0.584665	0.773163	0.549521	0.738019	0.763578	0.549521	0.587859	0.623003	0.722045	0.56869	0.594249	0.597444	0.610224	0.699681	0.58147	0.58147	0.549521	0.642173	0.715655	0.504792	0.571885	0.715655	0.670927	0.651757	0.693291	0.543131	0.71885	0.747604	0.58147
B*51:19	0.757188	0.71246	0.760383	0.741214	0.773163	0.798722	0.792332	0.817891	0.859425	0.827476	0.795527	0.664537	0.801917	0.769968	0.763578	0.789137	0.722045	0.674121	0.722045	0.619808	0.594249	0.782748	0.559105	0.696486	0.747604	0.559105	0.597444	0.632588	0.731629	0.635783	0.603834	0.607029	0.619808	0.658147	0.539936	0.539936	0.507987	0.600639	0.674121	0.463259	0.530351	0.674121	0.680511	0.610224	0.651757	0.501597	0.677316	0.70607	0.539936
B*51:20	0.709265	0.664537	0.680511	0.693291	0.72524	0.750799	0.744409	0.769968	0.811502	0.779553	0.747604	0.699681	0.753994	0.722045	0.715655	0.741214	0.715655	0.626198	0.674121	0.571885	0.546326	0.734824	0.552716	0.690096	0.699681	0.552716	0.549521	0.584665	0.683706	0.587859	0.555911	0.559105	0.571885	0.578275	0.460064	0.460064	0.428115	0.520767	0.594249	0.456869	0.450479	0.594249	0.632588	0.613419	0.571885	0.421725	0.597444	0.626198	0.460064
B*51:21	0.693291	0.648562	0.696486	0.677316	0.709265	0.734824	0.728435	0.753994	0.795527	0.763578	0.731629	0.600639	0.738019	0.744409	0.699681	0.72524	0.658147	0.610224	0.658147	0.555911	0.530351	0.71885	0.479233	0.683706	0.709265	0.495208	0.533546	0.56869	0.667732	0.571885	0.539936	0.543131	0.555911	0.629393	0.511182	0.511182	0.479233	0.571885	0.645367	0.434505	0.501597	0.645367	0.600639	0.58147	0.623003	0.472843	0.648562	0.677316	0.511182
B*51:22	0.738019	0.693291	0.741214	0.722045	0.753994	0.779553	0.70607	0.798722	0.840256	0.808307	0.776358	0.645367	0.782748	0.750799	0.744409	0.769968	0.702875	0.654952	0.702875	0.600639	0.57508	0.763578	0.539936	0.728435	0.753994	0.539936	0.578275	0.613419	0.71246	0.616613	0.584665	0.587859	0.600639	0.722045	0.603834	0.546326	0.571885	0.664537	0.738019	0.527157	0.594249	0.738019	0.693291	0.674121	0.715655	0.565495	0.741214	0.769968	0.603834
B*51:23	0.709265	0.664537	0.71246	0.693291	0.72524	0.750799	0.744409	0.769968	0.811502	0.779553	0.747604	0.616613	0.753994	0.651757	0.715655	0.741214	0.674121	0.626198	0.674121	0.571885	0.546326	0.734824	0.511182	0.699681	0.72524	0.511182	0.549521	0.584665	0.683706	0.587859	0.555911	0.559105	0.571885	0.661342	0.543131	0.543131	0.511182	0.603834	0.677316	0.466454	0.533546	0.677316	0.632588	0.613419	0.654952	0.504792	0.680511	0.709265	0.543131
B*51:29	0.683706	0.638978	0.71885	0.667732	0.699681	0.72524	0.71885	0.744409	0.785942	0.753994	0.722045	0.591054	0.728435	0.696486	0.690096	0.715655	0.722045	0.600639	0.648562	0.546326	0.520767	0.709265	0.559105	0.747604	0.699681	0.559105	0.523962	0.559105	0.658147	0.5623	0.530351	0.533546	0.546326	0.667732	0.549521	0.549521	0.517572	0.610224	0.683706	0.514377	0.539936	0.683706	0.607029	0.619808	0.661342	0.511182	0.686901	0.715655	0.549521
B*51:31	0.715655	0.670927	0.71885	0.699681	0.731629	0.757188	0.750799	0.776358	0.817891	0.785942	0.753994	0.623003	0.760383	0.795527	0.722045	0.747604	0.680511	0.632588	0.680511	0.578275	0.552716	0.741214	0.546326	0.654952	0.70607	0.517572	0.555911	0.591054	0.690096	0.594249	0.5623	0.565495	0.578275	0.645367	0.527157	0.527157	0.495208	0.587859	0.661342	0.450479	0.517572	0.661342	0.667732	0.597444	0.638978	0.488818	0.664537	0.693291	0.527157
B*51:34	0.629393	0.584665	0.632588	0.613419	0.645367	0.670927	0.664537	0.690096	0.731629	0.699681	0.667732	0.536741	0.674121	0.709265	0.635783	0.661342	0.594249	0.546326	0.594249	0.492013	0.466454	0.654952	0.460064	0.619808	0.645367	0.43131	0.469649	0.504792	0.603834	0.507987	0.476038	0.479233	0.492013	0.610224	0.492013	0.492013	0.460064	0.552716	0.626198	0.415335	0.482428	0.626198	0.58147	0.5623	0.603834	0.453674	0.629393	0.658147	0.492013
B*51:36	0.677316	0.632588	0.648562	0.661342	0.693291	0.71885	0.71246	0.738019	0.779553	0.747604	0.715655	0.584665	0.722045	0.728435	0.683706	0.709265	0.683706	0.594249	0.642173	0.539936	0.514377	0.702875	0.504792	0.709265	0.693291	0.520767	0.517572	0.552716	0.651757	0.555911	0.523962	0.527157	0.539936	0.58147	0.463259	0.463259	0.43131	0.523962	0.597444	0.460064	0.453674	0.597444	0.584665	0.533546	0.57508	0.42492	0.600639	0.629393	0.463259
B*51:37	0.738019	0.693291	0.741214	0.734824	0.753994	0.71246	0.773163	0.798722	0.840256	0.808307	0.776358	0.645367	0.782748	0.750799	0.744409	0.769968	0.702875	0.597444	0.702875	0.600639	0.587859	0.763578	0.539936	0.728435	0.753994	0.552716	0.578275	0.626198	0.71246	0.613419	0.584665	0.587859	0.600639	0.702875	0.584665	0.584665	0.539936	0.645367	0.71885	0.507987	0.57508	0.71885	0.674121	0.654952	0.696486	0.546326	0.722045	0.670927	0.584665
B*51:40	0.715655	0.670927	0.71885	0.699681	0.731629	0.757188	0.750799	0.776358	0.817891	0.785942	0.753994	0.623003	0.760383	0.728435	0.722045	0.747604	0.680511	0.632588	0.680511	0.578275	0.552716	0.741214	0.517572	0.654952	0.70607	0.517572	0.555911	0.591054	0.690096	0.594249	0.5623	0.565495	0.578275	0.616613	0.498403	0.498403	0.466454	0.559105	0.632588	0.421725	0.488818	0.632588	0.638978	0.56869	0.610224	0.460064	0.635783	0.664537	0.498403
B*51:42	0.798722	0.753994	0.801917	0.811502	0.773163	0.782748	0.833866	0.753994	0.900958	0.70607	0.837061	0.70607	0.738019	0.741214	0.805112	0.830671	0.763578	0.661342	0.763578	0.661342	0.734824	0.824281	0.686901	0.738019	0.789137	0.699681	0.72524	0.773163	0.773163	0.709265	0.731629	0.734824	0.747604	0.71246	0.594249	0.680511	0.635783	0.744409	0.686901	0.603834	0.629393	0.728435	0.734824	0.664537	0.70607	0.642173	0.731629	0.690096	0.680511
B*51:43	0.760383	0.715655	0.763578	0.744409	0.776358	0.801917	0.795527	0.821086	0.86262	0.830671	0.798722	0.667732	0.805112	0.773163	0.766773	0.792332	0.72524	0.677316	0.72524	0.623003	0.597444	0.785942	0.5623	0.750799	0.776358	0.5623	0.600639	0.635783	0.734824	0.638978	0.607029	0.610224	0.623003	0.71246	0.594249	0.594249	0.5623	0.654952	0.728435	0.517572	0.584665	0.728435	0.683706	0.664537	0.70607	0.555911	0.731629	0.760383	0.594249
B*51:55	0.674121	0.629393	0.677316	0.658147	0.690096	0.715655	0.709265	0.734824	0.776358	0.744409	0.71246	0.58147	0.71885	0.686901	0.680511	0.70607	0.683706	0.591054	0.638978	0.536741	0.511182	0.699681	0.520767	0.709265	0.690096	0.520767	0.514377	0.549521	0.648562	0.552716	0.520767	0.523962	0.536741	0.626198	0.507987	0.507987	0.476038	0.56869	0.642173	0.476038	0.498403	0.642173	0.597444	0.578275	0.619808	0.469649	0.645367	0.674121	0.507987
B*51:61	0.683706	0.638978	0.715655	0.667732	0.699681	0.72524	0.71885	0.744409	0.785942	0.753994	0.722045	0.591054	0.728435	0.696486	0.690096	0.715655	0.696486	0.600639	0.648562	0.546326	0.520767	0.709265	0.533546	0.722045	0.699681	0.533546	0.523962	0.559105	0.658147	0.5623	0.530351	0.533546	0.546326	0.664537	0.546326	0.546326	0.514377	0.607029	0.680511	0.488818	0.536741	0.680511	0.607029	0.616613	0.658147	0.507987	0.683706	0.71246	0.546326
B*51:64	0.686901	0.642173	0.690096	0.670927	0.702875	0.728435	0.722045	0.750799	0.789137	0.760383	0.72524	0.594249	0.734824	0.699681	0.693291	0.71885	0.651757	0.603834	0.651757	0.549521	0.523962	0.71246	0.488818	0.677316	0.702875	0.488818	0.527157	0.5623	0.661342	0.565495	0.533546	0.536741	0.549521	0.638978	0.520767	0.520767	0.488818	0.674121	0.654952	0.444089	0.511182	0.654952	0.610224	0.591054	0.632588	0.482428	0.658147	0.686901	0.520767
B*51:73	0.72524	0.680511	0.728435	0.709265	0.741214	0.766773	0.760383	0.785942	0.827476	0.795527	0.763578	0.632588	0.769968	0.738019	0.731629	0.757188	0.690096	0.642173	0.690096	0.587859	0.5623	0.750799	0.527157	0.664537	0.715655	0.527157	0.565495	0.600639	0.699681	0.603834	0.571885	0.57508	0.587859	0.626198	0.507987	0.507987	0.476038	0.56869	0.642173	0.43131	0.498403	0.642173	0.648562	0.578275	0.619808	0.469649	0.645367	0.674121	0.507987
B*51:81	0.594249	0.549521	0.597444	0.578275	0.610224	0.635783	0.629393	0.658147	0.696486	0.667732	0.632588	0.501597	0.642173	0.674121	0.600639	0.626198	0.559105	0.511182	0.559105	0.456869	0.43131	0.619808	0.42492	0.533546	0.584665	0.396166	0.434505	0.469649	0.56869	0.472843	0.440895	0.444089	0.456869	0.523962	0.405751	0.405751	0.373802	0.559105	0.539936	0.329073	0.396166	0.539936	0.546326	0.476038	0.517572	0.367412	0.543131	0.571885	0.405751
B*51:93	0.693291	0.648562	0.696486	0.677316	0.709265	0.734824	0.728435	0.753994	0.795527	0.763578	0.731629	0.600639	0.738019	0.773163	0.699681	0.72524	0.658147	0.610224	0.658147	0.555911	0.530351	0.71885	0.523962	0.632588	0.683706	0.495208	0.533546	0.56869	0.667732	0.571885	0.539936	0.543131	0.555911	0.623003	0.504792	0.504792	0.472843	0.565495	0.638978	0.428115	0.495208	0.638978	0.645367	0.57508	0.616613	0.466454	0.642173	0.670927	0.504792
B*51:97	0.757188	0.71246	0.728435	0.741214	0.773163	0.731629	0.792332	0.817891	0.859425	0.827476	0.795527	0.664537	0.801917	0.769968	0.763578	0.789137	0.763578	0.616613	0.722045	0.619808	0.594249	0.782748	0.600639	0.738019	0.747604	0.600639	0.597444	0.632588	0.731629	0.619808	0.603834	0.607029	0.619808	0.626198	0.507987	0.507987	0.476038	0.56869	0.642173	0.504792	0.498403	0.642173	0.680511	0.578275	0.619808	0.469649	0.645367	0.607029	0.507987
B*52:01	0.760383	0.715655	0.763578	0.744409	0.776358	0.801917	0.750799	0.821086	0.837061	0.830671	0.798722	0.667732	0.805112	0.773163	0.766773	0.792332	0.72524	0.677316	0.72524	0.623003	0.597444	0.785942	0.5623	0.750799	0.776358	0.5623	0.600639	0.635783	0.734824	0.638978	0.607029	0.610224	0.623003	0.72524	0.607029	0.543131	0.57508	0.667732	0.741214	0.530351	0.597444	0.741214	0.696486	0.677316	0.71885	0.56869	0.744409	0.773163	0.607029
B*52:02	0.782748	0.738019	0.785942	0.766773	0.798722	0.824281	0.773163	0.84345	0.859425	0.853035	0.821086	0.690096	0.827476	0.795527	0.789137	0.814696	0.747604	0.699681	0.747604	0.645367	0.619808	0.808307	0.584665	0.773163	0.798722	0.584665	0.623003	0.658147	0.757188	0.661342	0.629393	0.632588	0.645367	0.747604	0.629393	0.565495	0.597444	0.690096	0.763578	0.552716	0.619808	0.763578	0.71885	0.699681	0.741214	0.591054	0.766773	0.795527	0.629393
B*52:03	0.753994	0.709265	0.757188	0.738019	0.769968	0.795527	0.744409	0.814696	0.830671	0.824281	0.792332	0.661342	0.798722	0.766773	0.760383	0.785942	0.71885	0.670927	0.71885	0.616613	0.591054	0.779553	0.555911	0.693291	0.744409	0.555911	0.594249	0.629393	0.728435	0.632588	0.600639	0.603834	0.616613	0.667732	0.549521	0.485623	0.517572	0.610224	0.683706	0.472843	0.539936	0.683706	0.690096	0.619808	0.661342	0.511182	0.686901	0.715655	0.549521
B*52:04	0.785942	0.741214	0.789137	0.769968	0.801917	0.827476	0.776358	0.846645	0.86262	0.85623	0.824281	0.693291	0.830671	0.798722	0.792332	0.817891	0.750799	0.702875	0.750799	0.648562	0.623003	0.811502	0.587859	0.776358	0.801917	0.587859	0.626198	0.661342	0.760383	0.664537	0.632588	0.635783	0.648562	0.750799	0.632588	0.56869	0.600639	0.693291	0.766773	0.555911	0.623003	0.766773	0.722045	0.702875	0.744409	0.594249	0.769968	0.798722	0.632588
B*52:06	0.70607	0.661342	0.709265	0.690096	0.722045	0.747604	0.741214	0.766773	0.782748	0.776358	0.744409	0.613419	0.750799	0.71885	0.71246	0.738019	0.670927	0.623003	0.670927	0.56869	0.543131	0.731629	0.507987	0.696486	0.722045	0.507987	0.546326	0.58147	0.680511	0.584665	0.552716	0.555911	0.56869	0.658147	0.539936	0.539936	0.507987	0.600639	0.674121	0.463259	0.530351	0.674121	0.629393	0.610224	0.651757	0.501597	0.677316	0.70607	0.539936
B*52:11	0.709265	0.664537	0.71246	0.693291	0.72524	0.750799	0.699681	0.769968	0.785942	0.779553	0.747604	0.616613	0.753994	0.722045	0.715655	0.741214	0.674121	0.626198	0.674121	0.571885	0.546326	0.734824	0.511182	0.699681	0.72524	0.511182	0.549521	0.584665	0.683706	0.587859	0.555911	0.559105	0.571885	0.674121	0.555911	0.492013	0.523962	0.616613	0.690096	0.479233	0.546326	0.690096	0.645367	0.626198	0.667732	0.517572	0.693291	0.722045	0.555911
B*52:20	0.731629	0.686901	0.734824	0.715655	0.747604	0.773163	0.722045	0.792332	0.808307	0.801917	0.769968	0.638978	0.776358	0.744409	0.738019	0.763578	0.696486	0.648562	0.696486	0.623003	0.56869	0.757188	0.533546	0.722045	0.747604	0.533546	0.571885	0.607029	0.70607	0.610224	0.578275	0.58147	0.594249	0.696486	0.571885	0.514377	0.546326	0.638978	0.71246	0.501597	0.56869	0.71246	0.667732	0.648562	0.690096	0.539936	0.715655	0.744409	0.578275
B*53:01	0.779553	0.734824	0.782748	0.776358	0.753994	0.753994	0.814696	0.699681	0.881789	0.744409	0.817891	0.686901	0.71885	0.792332	0.785942	0.811502	0.744409	0.638978	0.744409	0.642173	0.629393	0.805112	0.58147	0.71885	0.769968	0.594249	0.619808	0.667732	0.753994	0.654952	0.626198	0.629393	0.642173	0.693291	0.57508	0.57508	0.530351	0.72524	0.667732	0.498403	0.523962	0.709265	0.715655	0.645367	0.686901	0.536741	0.71246	0.661342	0.57508
B*53:02	0.782748	0.738019	0.785942	0.779553	0.757188	0.757188	0.817891	0.702875	0.884984	0.747604	0.821086	0.690096	0.722045	0.795527	0.789137	0.814696	0.747604	0.642173	0.747604	0.645367	0.632588	0.808307	0.584665	0.722045	0.773163	0.597444	0.623003	0.670927	0.757188	0.658147	0.629393	0.632588	0.645367	0.696486	0.578275	0.578275	0.533546	0.728435	0.670927	0.501597	0.527157	0.71246	0.71885	0.648562	0.690096	0.539936	0.715655	0.664537	0.578275
B*53:04	0.72524	0.680511	0.728435	0.722045	0.699681	0.750799	0.760383	0.645367	0.827476	0.690096	0.763578	0.632588	0.664537	0.738019	0.731629	0.757188	0.690096	0.632588	0.690096	0.587859	0.57508	0.750799	0.527157	0.664537	0.715655	0.539936	0.565495	0.613419	0.699681	0.587859	0.571885	0.57508	0.587859	0.638978	0.520767	0.520767	0.476038	0.670927	0.613419	0.444089	0.469649	0.654952	0.661342	0.591054	0.632588	0.482428	0.658147	0.658147	0.520767
B*53:05	0.769968	0.72524	0.773163	0.766773	0.744409	0.744409	0.805112	0.690096	0.872204	0.734824	0.808307	0.677316	0.709265	0.782748	0.776358	0.801917	0.734824	0.629393	0.734824	0.654952	0.619808	0.795527	0.571885	0.709265	0.760383	0.584665	0.610224	0.658147	0.744409	0.645367	0.616613	0.619808	0.632588	0.683706	0.587859	0.565495	0.520767	0.715655	0.658147	0.488818	0.514377	0.699681	0.70607	0.635783	0.677316	0.527157	0.702875	0.651757	0.565495
B*53:08	0.72524	0.680511	0.728435	0.722045	0.699681	0.699681	0.760383	0.645367	0.827476	0.690096	0.763578	0.632588	0.664537	0.738019	0.731629	0.757188	0.690096	0.584665	0.690096	0.587859	0.57508	0.750799	0.527157	0.715655	0.741214	0.539936	0.565495	0.613419	0.699681	0.600639	0.571885	0.57508	0.587859	0.690096	0.571885	0.571885	0.527157	0.722045	0.664537	0.495208	0.520767	0.70607	0.661342	0.642173	0.683706	0.533546	0.709265	0.658147	0.571885
B*53:09	0.766773	0.722045	0.769968	0.763578	0.741214	0.741214	0.757188	0.686901	0.86901	0.731629	0.805112	0.674121	0.70607	0.779553	0.773163	0.798722	0.731629	0.626198	0.731629	0.658147	0.616613	0.792332	0.56869	0.70607	0.757188	0.58147	0.607029	0.654952	0.741214	0.642173	0.613419	0.616613	0.629393	0.693291	0.56869	0.511182	0.530351	0.72524	0.667732	0.498403	0.523962	0.709265	0.715655	0.645367	0.686901	0.536741	0.71246	0.661342	0.57508
B*53:10	0.801917	0.757188	0.805112	0.798722	0.776358	0.776358	0.837061	0.722045	0.904153	0.766773	0.840256	0.709265	0.741214	0.814696	0.808307	0.833866	0.766773	0.661342	0.766773	0.664537	0.651757	0.827476	0.603834	0.741214	0.792332	0.616613	0.642173	0.690096	0.776358	0.677316	0.648562	0.651757	0.664537	0.715655	0.597444	0.597444	0.552716	0.747604	0.690096	0.520767	0.546326	0.731629	0.738019	0.667732	0.709265	0.559105	0.734824	0.683706	0.597444
B*53:19	0.734824	0.690096	0.738019	0.71885	0.709265	0.776358	0.769968	0.654952	0.837061	0.699681	0.773163	0.642173	0.674121	0.747604	0.741214	0.766773	0.699681	0.651757	0.699681	0.597444	0.571885	0.760383	0.536741	0.674121	0.72524	0.536741	0.57508	0.610224	0.709265	0.613419	0.58147	0.584665	0.597444	0.635783	0.517572	0.517572	0.485623	0.667732	0.610224	0.440895	0.466454	0.651757	0.658147	0.587859	0.629393	0.479233	0.654952	0.683706	0.517572
B*53:20	0.776358	0.731629	0.779553	0.773163	0.750799	0.750799	0.811502	0.696486	0.878594	0.741214	0.814696	0.683706	0.715655	0.789137	0.782748	0.808307	0.741214	0.635783	0.741214	0.638978	0.626198	0.801917	0.578275	0.715655	0.766773	0.591054	0.616613	0.664537	0.750799	0.651757	0.623003	0.626198	0.638978	0.690096	0.571885	0.571885	0.527157	0.722045	0.664537	0.495208	0.520767	0.70607	0.71246	0.642173	0.683706	0.533546	0.709265	0.658147	0.571885
B*53:21	0.728435	0.683706	0.731629	0.72524	0.702875	0.702875	0.763578	0.648562	0.830671	0.693291	0.766773	0.635783	0.667732	0.741214	0.734824	0.760383	0.693291	0.587859	0.693291	0.591054	0.578275	0.753994	0.530351	0.667732	0.71885	0.543131	0.56869	0.616613	0.741214	0.603834	0.57508	0.578275	0.591054	0.699681	0.58147	0.58147	0.536741	0.731629	0.674121	0.504792	0.530351	0.715655	0.722045	0.651757	0.693291	0.543131	0.71885	0.667732	0.58147
B*53:22	0.795527	0.750799	0.766773	0.792332	0.769968	0.769968	0.830671	0.715655	0.897764	0.760383	0.833866	0.702875	0.734824	0.738019	0.801917	0.827476	0.801917	0.654952	0.760383	0.658147	0.645367	0.821086	0.638978	0.776358	0.785942	0.651757	0.635783	0.683706	0.769968	0.670927	0.642173	0.645367	0.658147	0.677316	0.559105	0.559105	0.514377	0.709265	0.651757	0.555911	0.507987	0.693291	0.731629	0.629393	0.670927	0.520767	0.696486	0.645367	0.559105
B*53:24	0.741214	0.696486	0.776358	0.738019	0.715655	0.715655	0.776358	0.661342	0.84345	0.70607	0.779553	0.648562	0.680511	0.753994	0.747604	0.773163	0.779553	0.600639	0.70607	0.603834	0.591054	0.766773	0.616613	0.753994	0.731629	0.629393	0.58147	0.629393	0.715655	0.616613	0.587859	0.591054	0.603834	0.686901	0.56869	0.56869	0.523962	0.71885	0.661342	0.533546	0.517572	0.702875	0.677316	0.638978	0.680511	0.530351	0.70607	0.654952	0.56869
B*54:01	0.527157	0.56869	0.530351	0.511182	0.543131	0.530351	0.559105	0.552716	0.603834	0.597444	0.565495	0.603834	0.571885	0.578275	0.533546	0.559105	0.492013	0.405751	0.492013	0.661342	0.364217	0.552716	0.313099	0.466454	0.517572	0.329073	0.367412	0.402556	0.501597	0.380192	0.383387	0.376997	0.389776	0.527157	0.651757	0.396166	0.376997	0.469649	0.543131	0.332268	0.399361	0.543131	0.549521	0.5623	0.546326	0.402556	0.546326	0.536741	0.408946
B*54:07	0.527157	0.56869	0.530351	0.511182	0.543131	0.530351	0.559105	0.552716	0.603834	0.597444	0.565495	0.603834	0.571885	0.578275	0.533546	0.559105	0.492013	0.405751	0.492013	0.661342	0.364217	0.552716	0.313099	0.466454	0.517572	0.329073	0.367412	0.402556	0.501597	0.380192	0.383387	0.376997	0.389776	0.527157	0.651757	0.396166	0.376997	0.469649	0.543131	0.332268	0.399361	0.543131	0.549521	0.5623	0.546326	0.402556	0.546326	0.536741	0.408946
B*54:18	0.543131	0.584665	0.546326	0.527157	0.559105	0.546326	0.57508	0.56869	0.619808	0.613419	0.58147	0.619808	0.587859	0.594249	0.549521	0.57508	0.507987	0.421725	0.507987	0.677316	0.380192	0.56869	0.329073	0.482428	0.533546	0.345048	0.383387	0.41853	0.517572	0.396166	0.399361	0.392971	0.405751	0.543131	0.667732	0.412141	0.392971	0.485623	0.559105	0.348243	0.415335	0.559105	0.565495	0.578275	0.5623	0.41853	0.5623	0.552716	0.42492
B*54:20	0.447284	0.488818	0.482428	0.43131	0.463259	0.450479	0.479233	0.472843	0.523962	0.517572	0.485623	0.523962	0.492013	0.498403	0.453674	0.479233	0.485623	0.325879	0.412141	0.58147	0.284345	0.472843	0.306709	0.511182	0.463259	0.322684	0.28754	0.322684	0.421725	0.300319	0.303514	0.297125	0.309904	0.530351	0.654952	0.399361	0.380192	0.472843	0.546326	0.376997	0.402556	0.546326	0.469649	0.565495	0.549521	0.405751	0.549521	0.539936	0.412141
B*54:23	0.514377	0.555911	0.517572	0.498403	0.530351	0.517572	0.546326	0.539936	0.591054	0.584665	0.552716	0.584665	0.559105	0.565495	0.520767	0.546326	0.479233	0.392971	0.479233	0.648562	0.351438	0.539936	0.300319	0.453674	0.504792	0.316294	0.354633	0.389776	0.488818	0.367412	0.370607	0.364217	0.376997	0.514377	0.638978	0.383387	0.364217	0.456869	0.530351	0.319489	0.386581	0.530351	0.536741	0.543131	0.533546	0.389776	0.533546	0.523962	0.396166
B*55:01	0.472843	0.514377	0.476038	0.456869	0.488818	0.476038	0.504792	0.498403	0.603834	0.543131	0.511182	0.549521	0.517572	0.523962	0.479233	0.504792	0.4377	0.351438	0.4377	0.607029	0.309904	0.498403	0.258786	0.463259	0.488818	0.27476	0.313099	0.348243	0.447284	0.325879	0.329073	0.322684	0.335463	0.523962	0.648562	0.392971	0.373802	0.466454	0.539936	0.329073	0.396166	0.539936	0.495208	0.559105	0.543131	0.399361	0.543131	0.533546	0.405751
B*55:02	0.498403	0.539936	0.501597	0.482428	0.514377	0.501597	0.530351	0.523962	0.629393	0.56869	0.536741	0.57508	0.543131	0.549521	0.504792	0.530351	0.463259	0.376997	0.463259	0.632588	0.335463	0.523962	0.284345	0.4377	0.488818	0.300319	0.338658	0.373802	0.472843	0.351438	0.354633	0.348243	0.361022	0.498403	0.623003	0.367412	0.348243	0.440895	0.514377	0.303514	0.370607	0.514377	0.520767	0.533546	0.517572	0.373802	0.517572	0.507987	0.380192
B*55:03	0.498403	0.539936	0.501597	0.482428	0.514377	0.501597	0.530351	0.523962	0.578275	0.56869	0.485623	0.57508	0.543131	0.549521	0.504792	0.530351	0.463259	0.376997	0.463259	0.632588	0.335463	0.523962	0.284345	0.488818	0.514377	0.300319	0.338658	0.373802	0.472843	0.351438	0.354633	0.348243	0.361022	0.549521	0.674121	0.41853	0.399361	0.492013	0.565495	0.354633	0.421725	0.565495	0.520767	0.584665	0.56869	0.42492	0.56869	0.559105	0.43131
B*55:04	0.383387	0.42492	0.386581	0.367412	0.399361	0.42492	0.415335	0.447284	0.514377	0.456869	0.421725	0.460064	0.43131	0.434505	0.389776	0.415335	0.348243	0.300319	0.348243	0.517572	0.220447	0.408946	0.169329	0.322684	0.373802	0.185304	0.223642	0.258786	0.357827	0.261981	0.239617	0.233227	0.246006	0.383387	0.507987	0.252396	0.233227	0.41853	0.399361	0.188498	0.255591	0.399361	0.405751	0.41853	0.402556	0.258786	0.402556	0.43131	0.265176
B*55:07	0.501597	0.543131	0.504792	0.485623	0.517572	0.504792	0.533546	0.527157	0.594249	0.571885	0.539936	0.578275	0.546326	0.552716	0.507987	0.533546	0.466454	0.380192	0.466454	0.635783	0.338658	0.527157	0.28754	0.440895	0.492013	0.303514	0.341853	0.376997	0.476038	0.354633	0.357827	0.351438	0.364217	0.501597	0.626198	0.370607	0.351438	0.444089	0.517572	0.306709	0.373802	0.517572	0.523962	0.536741	0.520767	0.376997	0.520767	0.511182	0.383387
B*55:10	0.466454	0.507987	0.469649	0.450479	0.482428	0.469649	0.498403	0.492013	0.597444	0.536741	0.504792	0.543131	0.511182	0.517572	0.472843	0.498403	0.43131	0.345048	0.43131	0.600639	0.303514	0.492013	0.252396	0.405751	0.456869	0.268371	0.306709	0.341853	0.479233	0.319489	0.322684	0.316294	0.329073	0.523962	0.648562	0.392971	0.373802	0.466454	0.539936	0.329073	0.396166	0.539936	0.546326	0.559105	0.543131	0.399361	0.543131	0.533546	0.405751
B*55:12	0.507987	0.549521	0.511182	0.492013	0.523962	0.511182	0.539936	0.533546	0.638978	0.578275	0.546326	0.584665	0.552716	0.559105	0.514377	0.539936	0.472843	0.386581	0.472843	0.619808	0.345048	0.533546	0.29393	0.447284	0.498403	0.309904	0.348243	0.383387	0.482428	0.361022	0.364217	0.357827	0.370607	0.507987	0.610224	0.376997	0.357827	0.450479	0.523962	0.313099	0.380192	0.523962	0.530351	0.543131	0.527157	0.383387	0.527157	0.517572	0.389776
B*55:18	0.629393	0.584665	0.632588	0.613419	0.645367	0.632588	0.619808	0.654952	0.72524	0.699681	0.667732	0.536741	0.674121	0.680511	0.635783	0.661342	0.594249	0.507987	0.594249	0.763578	0.466454	0.654952	0.415335	0.56869	0.619808	0.43131	0.469649	0.504792	0.603834	0.482428	0.476038	0.479233	0.492013	0.527157	0.651757	0.345048	0.376997	0.469649	0.543131	0.332268	0.399361	0.543131	0.549521	0.479233	0.546326	0.402556	0.546326	0.536741	0.408946
B*55:21	0.4377	0.479233	0.469649	0.421725	0.453674	0.440895	0.469649	0.463259	0.56869	0.507987	0.476038	0.514377	0.482428	0.488818	0.444089	0.469649	0.450479	0.316294	0.402556	0.571885	0.27476	0.463259	0.271565	0.476038	0.453674	0.28754	0.277955	0.313099	0.412141	0.290735	0.29393	0.28754	0.300319	0.517572	0.642173	0.386581	0.367412	0.460064	0.533546	0.341853	0.389776	0.533546	0.460064	0.552716	0.536741	0.392971	0.536741	0.527157	0.399361
B*55:23	0.479233	0.520767	0.482428	0.476038	0.495208	0.453674	0.511182	0.504792	0.610224	0.549521	0.517572	0.555911	0.523962	0.530351	0.485623	0.511182	0.444089	0.338658	0.444089	0.613419	0.329073	0.504792	0.265176	0.41853	0.469649	0.29393	0.319489	0.367412	0.453674	0.354633	0.335463	0.329073	0.341853	0.492013	0.616613	0.361022	0.329073	0.434505	0.507987	0.297125	0.364217	0.507987	0.514377	0.527157	0.511182	0.367412	0.511182	0.460064	0.373802
B*55:31	0.492013	0.533546	0.495208	0.476038	0.507987	0.495208	0.523962	0.517572	0.623003	0.5623	0.530351	0.485623	0.536741	0.543131	0.498403	0.523962	0.456869	0.370607	0.456869	0.626198	0.329073	0.517572	0.277955	0.482428	0.507987	0.29393	0.332268	0.367412	0.466454	0.345048	0.348243	0.341853	0.354633	0.543131	0.667732	0.412141	0.392971	0.485623	0.559105	0.348243	0.415335	0.559105	0.514377	0.495208	0.5623	0.41853	0.5623	0.552716	0.42492
B*55:41	0.523962	0.565495	0.527157	0.507987	0.539936	0.527157	0.555911	0.549521	0.654952	0.536741	0.5623	0.600639	0.56869	0.57508	0.530351	0.555911	0.488818	0.345048	0.488818	0.658147	0.361022	0.549521	0.309904	0.463259	0.514377	0.325879	0.364217	0.399361	0.498403	0.319489	0.380192	0.373802	0.386581	0.523962	0.648562	0.392971	0.373802	0.466454	0.539936	0.329073	0.396166	0.539936	0.546326	0.559105	0.543131	0.399361	0.543131	0.533546	0.405751
B*55:49	0.392971	0.434505	0.396166	0.376997	0.408946	0.434505	0.42492	0.456869	0.472843	0.466454	0.380192	0.469649	0.440895	0.444089	0.399361	0.42492	0.357827	0.309904	0.357827	0.527157	0.230032	0.41853	0.178914	0.332268	0.383387	0.194888	0.233227	0.268371	0.367412	0.271565	0.249201	0.242812	0.255591	0.392971	0.517572	0.261981	0.242812	0.428115	0.408946	0.198083	0.265176	0.408946	0.415335	0.428115	0.412141	0.268371	0.412141	0.440895	0.27476
B*56:01	0.507987	0.549521	0.511182	0.492013	0.523962	0.511182	0.539936	0.533546	0.638978	0.578275	0.546326	0.584665	0.552716	0.520767	0.514377	0.539936	0.472843	0.386581	0.472843	0.642173	0.345048	0.533546	0.309904	0.447284	0.498403	0.309904	0.348243	0.383387	0.482428	0.361022	0.364217	0.357827	0.370607	0.523962	0.648562	0.392971	0.373802	0.466454	0.539936	0.329073	0.396166	0.539936	0.546326	0.559105	0.543131	0.399361	0.543131	0.533546	0.405751
B*56:02	0.488818	0.530351	0.492013	0.472843	0.463259	0.492013	0.520767	0.476038	0.619808	0.520767	0.527157	0.565495	0.495208	0.501597	0.495208	0.520767	0.453674	0.367412	0.453674	0.623003	0.325879	0.514377	0.290735	0.428115	0.479233	0.290735	0.329073	0.364217	0.463259	0.341853	0.345048	0.338658	0.351438	0.504792	0.629393	0.373802	0.354633	0.539936	0.479233	0.309904	0.335463	0.520767	0.527157	0.539936	0.523962	0.380192	0.523962	0.514377	0.386581
B*56:03	0.42492	0.466454	0.456869	0.421725	0.399361	0.399361	0.456869	0.447284	0.555911	0.456869	0.463259	0.501597	0.43131	0.4377	0.43131	0.456869	0.4377	0.284345	0.389776	0.559105	0.27476	0.450479	0.27476	0.463259	0.440895	0.28754	0.265176	0.313099	0.399361	0.300319	0.28115	0.27476	0.28754	0.533546	0.658147	0.402556	0.370607	0.56869	0.507987	0.357827	0.364217	0.549521	0.476038	0.56869	0.552716	0.408946	0.552716	0.501597	0.415335
B*56:04	0.472843	0.514377	0.476038	0.456869	0.447284	0.476038	0.504792	0.495208	0.603834	0.504792	0.511182	0.549521	0.479233	0.485623	0.479233	0.504792	0.4377	0.351438	0.4377	0.607029	0.309904	0.498403	0.27476	0.412141	0.463259	0.27476	0.313099	0.348243	0.447284	0.325879	0.329073	0.322684	0.335463	0.488818	0.613419	0.357827	0.338658	0.523962	0.463259	0.29393	0.319489	0.504792	0.511182	0.523962	0.507987	0.364217	0.507987	0.498403	0.370607
B*56:05	0.472843	0.514377	0.476038	0.456869	0.488818	0.514377	0.504792	0.533546	0.603834	0.543131	0.511182	0.549521	0.517572	0.485623	0.479233	0.504792	0.4377	0.389776	0.4377	0.607029	0.309904	0.498403	0.27476	0.463259	0.488818	0.27476	0.313099	0.348243	0.447284	0.351438	0.329073	0.322684	0.335463	0.539936	0.664537	0.408946	0.389776	0.482428	0.555911	0.345048	0.412141	0.555911	0.511182	0.57508	0.559105	0.415335	0.559105	0.587859	0.421725
B*56:07	0.632588	0.674121	0.635783	0.616613	0.648562	0.635783	0.664537	0.658147	0.763578	0.702875	0.670927	0.709265	0.677316	0.645367	0.638978	0.664537	0.597444	0.511182	0.597444	0.523962	0.469649	0.658147	0.434505	0.571885	0.623003	0.434505	0.472843	0.507987	0.607029	0.485623	0.488818	0.482428	0.495208	0.648562	0.523962	0.517572	0.498403	0.591054	0.664537	0.453674	0.520767	0.664537	0.670927	0.683706	0.642173	0.492013	0.667732	0.658147	0.530351
B*56:10	0.479233	0.520767	0.482428	0.463259	0.453674	0.482428	0.511182	0.466454	0.610224	0.511182	0.517572	0.555911	0.485623	0.530351	0.485623	0.511182	0.444089	0.357827	0.444089	0.613419	0.316294	0.504792	0.265176	0.41853	0.469649	0.28115	0.319489	0.354633	0.453674	0.332268	0.335463	0.329073	0.341853	0.479233	0.603834	0.348243	0.329073	0.514377	0.453674	0.284345	0.309904	0.495208	0.501597	0.514377	0.498403	0.354633	0.498403	0.488818	0.361022
B*56:11	0.492013	0.533546	0.495208	0.488818	0.466454	0.517572	0.523962	0.412141	0.623003	0.456869	0.530351	0.56869	0.43131	0.504792	0.498403	0.523962	0.456869	0.399361	0.456869	0.626198	0.341853	0.517572	0.29393	0.43131	0.482428	0.306709	0.332268	0.380192	0.466454	0.354633	0.348243	0.341853	0.354633	0.520767	0.645367	0.389776	0.357827	0.552716	0.495208	0.325879	0.351438	0.536741	0.543131	0.555911	0.539936	0.396166	0.539936	0.539936	0.402556
B*56:14	0.555911	0.587859	0.559105	0.539936	0.571885	0.559105	0.587859	0.58147	0.552716	0.626198	0.594249	0.623003	0.600639	0.56869	0.5623	0.587859	0.520767	0.434505	0.520767	0.690096	0.392971	0.58147	0.357827	0.495208	0.546326	0.357827	0.396166	0.43131	0.530351	0.408946	0.402556	0.405751	0.41853	0.5623	0.686901	0.43131	0.412141	0.504792	0.578275	0.367412	0.434505	0.578275	0.584665	0.597444	0.58147	0.4377	0.58147	0.571885	0.444089
B*56:15	0.469649	0.511182	0.472843	0.453674	0.485623	0.511182	0.501597	0.495208	0.600639	0.539936	0.507987	0.546326	0.514377	0.482428	0.476038	0.501597	0.434505	0.386581	0.434505	0.603834	0.306709	0.495208	0.271565	0.408946	0.460064	0.271565	0.309904	0.345048	0.444089	0.348243	0.325879	0.319489	0.332268	0.485623	0.610224	0.354633	0.335463	0.428115	0.501597	0.290735	0.357827	0.501597	0.507987	0.520767	0.504792	0.361022	0.504792	0.533546	0.367412
B*56:22	0.469649	0.511182	0.472843	0.453674	0.485623	0.495208	0.501597	0.495208	0.600639	0.539936	0.507987	0.546326	0.514377	0.482428	0.476038	0.501597	0.434505	0.376997	0.434505	0.603834	0.306709	0.495208	0.271565	0.408946	0.460064	0.271565	0.309904	0.345048	0.444089	0.319489	0.325879	0.319489	0.332268	0.485623	0.610224	0.354633	0.335463	0.428115	0.501597	0.290735	0.357827	0.501597	0.507987	0.520767	0.504792	0.361022	0.504792	0.517572	0.367412
B*57:01	0.840256	0.84984	0.84345	0.853035	0.846645	0.814696	0.846645	0.827476	0.884984	0.837061	0.878594	0.801917	0.811502	0.853035	0.846645	0.872204	0.805112	0.785942	0.805112	0.702875	0.776358	0.865815	0.728435	0.779553	0.830671	0.741214	0.766773	0.814696	0.814696	0.801917	0.782748	0.776358	0.789137	0.808307	0.690096	0.744409	0.731629	0.827476	0.814696	0.699681	0.757188	0.824281	0.830671	0.760383	0.801917	0.738019	0.827476	0.776358	0.776358
B*57:02	0.766773	0.776358	0.801917	0.766773	0.773163	0.808307	0.773163	0.753994	0.811502	0.763578	0.805112	0.728435	0.738019	0.779553	0.773163	0.798722	0.805112	0.769968	0.731629	0.629393	0.690096	0.792332	0.728435	0.779553	0.757188	0.728435	0.693291	0.728435	0.741214	0.731629	0.709265	0.702875	0.715655	0.753994	0.635783	0.690096	0.690096	0.773163	0.760383	0.686901	0.702875	0.769968	0.744409	0.70607	0.747604	0.683706	0.773163	0.801917	0.722045
B*57:03	0.805112	0.814696	0.808307	0.805112	0.811502	0.846645	0.811502	0.792332	0.84984	0.801917	0.84345	0.766773	0.776358	0.817891	0.811502	0.837061	0.769968	0.808307	0.769968	0.667732	0.728435	0.830671	0.693291	0.744409	0.795527	0.693291	0.731629	0.766773	0.779553	0.769968	0.747604	0.741214	0.753994	0.760383	0.642173	0.696486	0.696486	0.779553	0.766773	0.651757	0.709265	0.776358	0.782748	0.71246	0.753994	0.690096	0.779553	0.808307	0.728435
B*57:04	0.833866	0.84345	0.86901	0.846645	0.840256	0.817891	0.840256	0.821086	0.878594	0.773163	0.872204	0.795527	0.805112	0.846645	0.840256	0.865815	0.872204	0.696486	0.798722	0.696486	0.769968	0.859425	0.795527	0.846645	0.824281	0.808307	0.760383	0.808307	0.808307	0.744409	0.776358	0.769968	0.782748	0.833866	0.715655	0.769968	0.757188	0.853035	0.840256	0.766773	0.782748	0.84984	0.824281	0.785942	0.827476	0.763578	0.853035	0.811502	0.801917
B*57:05	0.805112	0.814696	0.840256	0.805112	0.779553	0.846645	0.811502	0.72524	0.84984	0.71246	0.84345	0.766773	0.744409	0.817891	0.811502	0.837061	0.84345	0.750799	0.769968	0.667732	0.728435	0.830671	0.766773	0.817891	0.795527	0.766773	0.731629	0.766773	0.779553	0.71246	0.747604	0.741214	0.753994	0.792332	0.674121	0.728435	0.728435	0.824281	0.766773	0.72524	0.709265	0.808307	0.782748	0.744409	0.785942	0.722045	0.811502	0.840256	0.760383
B*57:09	0.776358	0.785942	0.747604	0.776358	0.782748	0.817891	0.782748	0.763578	0.821086	0.773163	0.814696	0.738019	0.747604	0.789137	0.782748	0.808307	0.782748	0.779553	0.741214	0.638978	0.699681	0.801917	0.70607	0.808307	0.792332	0.70607	0.702875	0.738019	0.750799	0.741214	0.71885	0.71246	0.72524	0.750799	0.632588	0.686901	0.686901	0.769968	0.757188	0.715655	0.699681	0.766773	0.753994	0.702875	0.744409	0.680511	0.769968	0.798722	0.71885
B*57:12	0.632588	0.642173	0.667732	0.632588	0.638978	0.674121	0.638978	0.619808	0.677316	0.629393	0.670927	0.594249	0.603834	0.645367	0.638978	0.664537	0.670927	0.635783	0.597444	0.766773	0.555911	0.658147	0.594249	0.645367	0.623003	0.594249	0.559105	0.594249	0.607029	0.597444	0.57508	0.56869	0.58147	0.619808	0.744409	0.555911	0.555911	0.638978	0.626198	0.552716	0.56869	0.635783	0.610224	0.571885	0.638978	0.58147	0.638978	0.667732	0.587859
B*57:42	0.808307	0.817891	0.84345	0.792332	0.814696	0.84984	0.814696	0.795527	0.853035	0.805112	0.846645	0.769968	0.779553	0.821086	0.814696	0.840256	0.846645	0.72524	0.773163	0.670927	0.645367	0.833866	0.683706	0.821086	0.798722	0.683706	0.648562	0.683706	0.782748	0.686901	0.664537	0.658147	0.670927	0.795527	0.677316	0.645367	0.645367	0.814696	0.801917	0.642173	0.658147	0.811502	0.785942	0.747604	0.789137	0.638978	0.814696	0.84345	0.677316
B*58:01	0.888179	0.897764	0.891374	0.884984	0.86262	0.86262	0.894569	0.808307	0.932907	0.853035	0.926518	0.84984	0.827476	0.900958	0.894569	0.920128	0.853035	0.747604	0.853035	0.750799	0.738019	0.913738	0.690096	0.827476	0.878594	0.702875	0.728435	0.776358	0.86262	0.763578	0.744409	0.738019	0.750799	0.85623	0.738019	0.70607	0.693291	0.888179	0.830671	0.661342	0.686901	0.872204	0.878594	0.808307	0.84984	0.699681	0.875399	0.824281	0.738019
B*58:02	0.86262	0.872204	0.865815	0.859425	0.84984	0.837061	0.86901	0.86262	0.907348	0.907348	0.900958	0.824281	0.881789	0.875399	0.86901	0.894569	0.827476	0.722045	0.827476	0.72524	0.71246	0.888179	0.664537	0.801917	0.853035	0.677316	0.702875	0.750799	0.837061	0.738019	0.71885	0.71246	0.72524	0.830671	0.71246	0.680511	0.667732	0.872204	0.817891	0.635783	0.674121	0.846645	0.853035	0.782748	0.824281	0.674121	0.84984	0.798722	0.71246
B*58:04	0.872204	0.881789	0.875399	0.86901	0.846645	0.846645	0.878594	0.792332	0.916933	0.837061	0.910543	0.833866	0.811502	0.884984	0.878594	0.904153	0.837061	0.731629	0.837061	0.734824	0.722045	0.897764	0.674121	0.811502	0.86262	0.686901	0.71246	0.760383	0.846645	0.747604	0.728435	0.722045	0.734824	0.840256	0.722045	0.690096	0.677316	0.872204	0.814696	0.645367	0.670927	0.85623	0.86262	0.792332	0.833866	0.683706	0.859425	0.808307	0.722045
B*58:06	0.808307	0.817891	0.811502	0.805112	0.795527	0.782748	0.814696	0.808307	0.853035	0.853035	0.846645	0.769968	0.827476	0.821086	0.814696	0.840256	0.773163	0.667732	0.773163	0.670927	0.658147	0.833866	0.610224	0.798722	0.824281	0.623003	0.648562	0.696486	0.782748	0.683706	0.664537	0.658147	0.670927	0.827476	0.709265	0.677316	0.664537	0.86901	0.814696	0.632588	0.670927	0.84345	0.798722	0.779553	0.821086	0.670927	0.846645	0.795527	0.709265
B*58:18	0.811502	0.821086	0.814696	0.808307	0.827476	0.785942	0.817891	0.840256	0.85623	0.884984	0.84984	0.773163	0.859425	0.824281	0.817891	0.84345	0.776358	0.670927	0.776358	0.674121	0.661342	0.837061	0.613419	0.750799	0.801917	0.626198	0.651757	0.699681	0.785942	0.686901	0.667732	0.661342	0.674121	0.779553	0.661342	0.629393	0.616613	0.814696	0.795527	0.584665	0.651757	0.795527	0.801917	0.731629	0.773163	0.623003	0.798722	0.747604	0.661342
B*58:19	0.84345	0.853035	0.846645	0.840256	0.817891	0.817891	0.84984	0.763578	0.888179	0.808307	0.881789	0.805112	0.782748	0.85623	0.84984	0.875399	0.808307	0.702875	0.808307	0.70607	0.693291	0.86901	0.645367	0.833866	0.859425	0.658147	0.683706	0.731629	0.817891	0.71885	0.699681	0.693291	0.70607	0.86262	0.744409	0.71246	0.699681	0.894569	0.837061	0.667732	0.693291	0.878594	0.833866	0.814696	0.85623	0.70607	0.881789	0.830671	0.744409
B*58:25	0.846645	0.85623	0.84984	0.84345	0.833866	0.821086	0.853035	0.846645	0.891374	0.891374	0.884984	0.808307	0.865815	0.859425	0.853035	0.878594	0.811502	0.70607	0.811502	0.709265	0.696486	0.872204	0.648562	0.785942	0.837061	0.661342	0.686901	0.734824	0.821086	0.722045	0.702875	0.696486	0.709265	0.814696	0.696486	0.664537	0.651757	0.85623	0.801917	0.619808	0.658147	0.830671	0.837061	0.766773	0.808307	0.658147	0.833866	0.782748	0.696486
B*58:29	0.955272	0.964856	0.958466	0.952077	0.929712	0.929712	0.961661	0.875399	1	0.920128	0.99361	0.916933	0.894569	0.968051	0.961661	0.98722	0.920128	0.814696	0.920128	0.817891	0.805112	0.980831	0.757188	0.894569	0.945687	0.769968	0.795527	0.84345	0.929712	0.830671	0.811502	0.805112	0.817891	0.923323	0.805112	0.773163	0.760383	0.955272	0.897764	0.728435	0.753994	0.939297	0.945687	0.875399	0.916933	0.766773	0.942492	0.891374	0.805112
B*58:32	0.872204	0.881789	0.875399	0.86901	0.846645	0.846645	0.878594	0.792332	0.916933	0.837061	0.910543	0.833866	0.811502	0.884984	0.878594	0.904153	0.837061	0.731629	0.837061	0.734824	0.722045	0.897764	0.674121	0.811502	0.86262	0.686901	0.71246	0.760383	0.846645	0.747604	0.728435	0.722045	0.734824	0.840256	0.722045	0.690096	0.677316	0.872204	0.814696	0.645367	0.670927	0.85623	0.86262	0.792332	0.833866	0.683706	0.859425	0.808307	0.722045
B*59:01	0.72524	0.680511	0.728435	0.709265	0.741214	0.728435	0.760383	0.750799	0.846645	0.795527	0.763578	0.632588	0.769968	0.776358	0.731629	0.757188	0.690096	0.603834	0.690096	0.587859	0.5623	0.750799	0.511182	0.664537	0.715655	0.527157	0.565495	0.600639	0.699681	0.578275	0.571885	0.57508	0.587859	0.610224	0.492013	0.492013	0.460064	0.552716	0.626198	0.415335	0.482428	0.626198	0.632588	0.5623	0.603834	0.453674	0.629393	0.619808	0.492013
B*59:02	0.645367	0.600639	0.648562	0.629393	0.661342	0.686901	0.680511	0.670927	0.766773	0.715655	0.683706	0.552716	0.690096	0.696486	0.651757	0.677316	0.610224	0.5623	0.610224	0.507987	0.482428	0.670927	0.43131	0.584665	0.635783	0.447284	0.485623	0.520767	0.619808	0.523962	0.492013	0.495208	0.507987	0.530351	0.412141	0.412141	0.380192	0.472843	0.546326	0.335463	0.402556	0.546326	0.552716	0.482428	0.523962	0.373802	0.549521	0.578275	0.412141
B*67:01	0.28754	0.329073	0.290735	0.28754	0.261981	0.313099	0.319489	0.309904	0.41853	0.319489	0.325879	0.364217	0.29393	0.338658	0.29393	0.319489	0.252396	0.450479	0.252396	0.421725	0.380192	0.313099	0.329073	0.226837	0.277955	0.345048	0.383387	0.41853	0.300319	0.392971	0.399361	0.392971	0.405751	0.345048	0.469649	0.469649	0.450479	0.380192	0.319489	0.405751	0.43131	0.361022	0.367412	0.380192	0.364217	0.476038	0.364217	0.376997	0.482428
B*67:02	0.41853	0.450479	0.421725	0.41853	0.392971	0.444089	0.450479	0.440895	0.28754	0.450479	0.383387	0.485623	0.42492	0.469649	0.42492	0.450479	0.383387	0.58147	0.383387	0.552716	0.511182	0.444089	0.460064	0.357827	0.408946	0.476038	0.514377	0.549521	0.43131	0.523962	0.520767	0.523962	0.536741	0.466454	0.591054	0.591054	0.571885	0.501597	0.440895	0.527157	0.530351	0.482428	0.488818	0.501597	0.485623	0.597444	0.485623	0.498403	0.603834
B*67:03	0.277955	0.319489	0.28115	0.261981	0.252396	0.303514	0.309904	0.300319	0.408946	0.309904	0.316294	0.354633	0.284345	0.329073	0.284345	0.309904	0.242812	0.402556	0.242812	0.412141	0.332268	0.303514	0.28115	0.217252	0.268371	0.297125	0.335463	0.370607	0.290735	0.345048	0.351438	0.345048	0.357827	0.335463	0.460064	0.421725	0.402556	0.370607	0.309904	0.357827	0.383387	0.351438	0.357827	0.370607	0.354633	0.428115	0.354633	0.367412	0.434505
B*78:01	0.552716	0.507987	0.555911	0.536741	0.56869	0.594249	0.587859	0.613419	0.654952	0.623003	0.591054	0.543131	0.597444	0.565495	0.559105	0.584665	0.517572	0.469649	0.517572	0.686901	0.389776	0.578275	0.354633	0.543131	0.56869	0.354633	0.392971	0.428115	0.527157	0.43131	0.399361	0.402556	0.415335	0.504792	0.629393	0.386581	0.354633	0.447284	0.520767	0.309904	0.376997	0.520767	0.476038	0.539936	0.523962	0.380192	0.523962	0.552716	0.386581
B*78:02	0.587859	0.543131	0.591054	0.571885	0.603834	0.629393	0.623003	0.648562	0.690096	0.658147	0.626198	0.495208	0.632588	0.600639	0.594249	0.619808	0.552716	0.504792	0.552716	0.722045	0.42492	0.613419	0.389776	0.578275	0.603834	0.389776	0.428115	0.463259	0.5623	0.466454	0.434505	0.4377	0.450479	0.539936	0.664537	0.421725	0.389776	0.482428	0.555911	0.345048	0.412141	0.555911	0.511182	0.492013	0.559105	0.415335	0.559105	0.587859	0.421725
B*78:04	0.58147	0.536741	0.584665	0.565495	0.597444	0.623003	0.616613	0.642173	0.683706	0.651757	0.619808	0.488818	0.626198	0.594249	0.587859	0.613419	0.546326	0.498403	0.546326	0.715655	0.41853	0.607029	0.383387	0.520767	0.571885	0.383387	0.421725	0.456869	0.555911	0.460064	0.428115	0.43131	0.444089	0.482428	0.607029	0.364217	0.332268	0.42492	0.498403	0.28754	0.354633	0.498403	0.504792	0.434505	0.501597	0.357827	0.501597	0.530351	0.364217
B*78:06	0.616613	0.571885	0.619808	0.600639	0.632588	0.658147	0.607029	0.677316	0.693291	0.686901	0.654952	0.523962	0.661342	0.629393	0.623003	0.648562	0.58147	0.533546	0.58147	0.728435	0.453674	0.642173	0.41853	0.607029	0.632588	0.41853	0.456869	0.492013	0.591054	0.495208	0.463259	0.466454	0.479233	0.58147	0.683706	0.399361	0.43131	0.523962	0.597444	0.386581	0.453674	0.597444	0.552716	0.533546	0.600639	0.456869	0.600639	0.629393	0.463259
B*78:07	0.514377	0.469649	0.517572	0.498403	0.530351	0.555911	0.549521	0.57508	0.616613	0.584665	0.552716	0.504792	0.559105	0.565495	0.520767	0.546326	0.479233	0.43131	0.479233	0.648562	0.351438	0.539936	0.300319	0.504792	0.530351	0.316294	0.354633	0.389776	0.488818	0.392971	0.361022	0.364217	0.376997	0.450479	0.57508	0.332268	0.300319	0.392971	0.466454	0.255591	0.322684	0.466454	0.421725	0.485623	0.469649	0.325879	0.469649	0.498403	0.332268
B*81:01	0.252396	0.29393	0.255591	0.252396	0.268371	0.29393	0.284345	0.316294	0.383387	0.325879	0.290735	0.329073	0.300319	0.332268	0.258786	0.284345	0.217252	0.380192	0.284345	0.386581	0.316294	0.277955	0.29393	0.191693	0.242812	0.265176	0.309904	0.338658	0.265176	0.341853	0.319489	0.313099	0.325879	0.392971	0.517572	0.472843	0.453674	0.428115	0.408946	0.408946	0.476038	0.408946	0.415335	0.428115	0.412141	0.479233	0.412141	0.440895	0.485623
B*82:01	0.559105	0.600639	0.530351	0.543131	0.533546	0.5623	0.591054	0.546326	0.690096	0.591054	0.597444	0.635783	0.565495	0.501597	0.565495	0.591054	0.565495	0.4377	0.523962	0.693291	0.396166	0.584665	0.402556	0.539936	0.549521	0.402556	0.399361	0.434505	0.533546	0.412141	0.415335	0.408946	0.421725	0.543131	0.667732	0.412141	0.392971	0.578275	0.517572	0.421725	0.373802	0.559105	0.597444	0.578275	0.5623	0.41853	0.5623	0.552716	0.42492
B*82:02	0.539936	0.58147	0.511182	0.523962	0.514377	0.543131	0.571885	0.527157	0.670927	0.571885	0.578275	0.616613	0.546326	0.482428	0.546326	0.571885	0.546326	0.41853	0.504792	0.674121	0.376997	0.565495	0.383387	0.520767	0.530351	0.383387	0.380192	0.415335	0.514377	0.392971	0.396166	0.389776	0.402556	0.523962	0.648562	0.392971	0.373802	0.559105	0.498403	0.402556	0.354633	0.539936	0.578275	0.559105	0.543131	0.399361	0.543131	0.533546	0.405751
B*83:01	0.552716	0.594249	0.523962	0.565495	0.527157	0.536741	0.584665	0.507987	0.683706	0.460064	0.591054	0.629393	0.492013	0.495208	0.559105	0.584665	0.559105	0.415335	0.517572	0.686901	0.488818	0.578275	0.482428	0.533546	0.543131	0.495208	0.479233	0.527157	0.527157	0.463259	0.495208	0.488818	0.501597	0.549521	0.674121	0.504792	0.472843	0.58147	0.523962	0.514377	0.466454	0.565495	0.603834	0.584665	0.56869	0.511182	0.56869	0.527157	0.517572
[truncated: 507 more columns]

## Sheet: C_sequence_distance_matrix
	C*01:02	C*01:03	C*01:04	C*01:05	C*01:06	C*01:08	C*01:10	C*01:16	C*01:17	C*01:18	C*01:22	C*01:23	C*02:02	C*02:03	C*02:04	C*02:06	C*02:07	C*02:08	C*02:14	C*02:16	C*02:18	C*02:19	C*02:27	C*02:28	C*03:02	C*03:03	C*03:04	C*03:05	C*03:06	C*03:07	C*03:08	C*03:09	C*03:10	C*03:14	C*03:16	C*03:17	C*03:19	C*03:21	C*03:27	C*03:34	C*03:36	C*03:37	C*03:38	C*03:39	C*03:43	C*03:44	C*03:49	C*03:56	C*03:57
C*01:02	0	0.0355731	0.173913	0.0909091	0.0395257	0.055336	0.0355731	0.110672	0.0237154	0.106719	0.055336	0.118577	0.422925	0.478261	0.462451	0.458498	0.454545	0.399209	0.458498	0.44664	0.434783	0.339921	0.395257	0.422925	0.450593	0.458498	0.418972	0.395257	0.454545	0.44664	0.434783	0.395257	0.434783	0.517787	0.395257	0.335968	0.466403	0.403162	0.399209	0.359684	0.482213	0.383399	0.434783	0.458498	0.509881	0.43083	0.411067	0.478261	0.44664
C*01:03	0.0355731	0	0.181818	0.118577	0.0671937	0.083004	0.0632411	0.13834	0.0513834	0.134387	0.083004	0.146245	0.43083	0.486166	0.470356	0.454545	0.450593	0.407115	0.466403	0.454545	0.442688	0.367589	0.403162	0.43083	0.458498	0.486166	0.44664	0.422925	0.470356	0.474308	0.462451	0.422925	0.462451	0.525692	0.403162	0.363636	0.462451	0.43083	0.426877	0.387352	0.490119	0.411067	0.462451	0.486166	0.517787	0.458498	0.438735	0.505929	0.474308
C*01:04	0.173913	0.181818	0	0.256917	0.205534	0.221344	0.201581	0.162055	0.189723	0.158103	0.189723	0.16996	0.324111	0.41502	0.363636	0.395257	0.367589	0.300395	0.359684	0.383399	0.371542	0.324111	0.296443	0.324111	0.454545	0.545455	0.505929	0.482213	0.541502	0.533597	0.521739	0.482213	0.521739	0.521739	0.399209	0.422925	0.505929	0.454545	0.418972	0.44664	0.486166	0.470356	0.521739	0.478261	0.513834	0.517787	0.529644	0.565217	0.466403
C*01:05	0.0909091	0.118577	0.256917	0	0.12253	0.13834	0.118577	0.193676	0.106719	0.189723	0.13834	0.201581	0.411067	0.466403	0.450593	0.44664	0.442688	0.387352	0.44664	0.434783	0.422925	0.328063	0.383399	0.411067	0.438735	0.44664	0.407115	0.399209	0.442688	0.434783	0.422925	0.383399	0.422925	0.505929	0.383399	0.391304	0.454545	0.391304	0.403162	0.347826	0.470356	0.371542	0.422925	0.44664	0.498024	0.418972	0.399209	0.466403	0.434783
C*01:06	0.0395257	0.0671937	0.205534	0.12253	0	0.0869565	0.0671937	0.142292	0.055336	0.13834	0.0869565	0.150198	0.454545	0.44664	0.494071	0.490119	0.486166	0.43083	0.490119	0.478261	0.434783	0.371542	0.426877	0.391304	0.482213	0.490119	0.450593	0.426877	0.486166	0.478261	0.466403	0.426877	0.466403	0.517787	0.426877	0.367589	0.498024	0.434783	0.43083	0.391304	0.450593	0.41502	0.466403	0.490119	0.541502	0.462451	0.442688	0.509881	0.478261
C*01:08	0.055336	0.083004	0.221344	0.13834	0.0869565	0	0.083004	0.158103	0.0711462	0.15415	0.102767	0.166008	0.470356	0.525692	0.509881	0.505929	0.501976	0.44664	0.505929	0.494071	0.482213	0.387352	0.442688	0.470356	0.498024	0.505929	0.466403	0.442688	0.501976	0.494071	0.482213	0.442688	0.482213	0.565217	0.442688	0.383399	0.513834	0.450593	0.44664	0.407115	0.529644	0.43083	0.482213	0.505929	0.557312	0.478261	0.458498	0.525692	0.494071
C*01:10	0.0355731	0.0632411	0.201581	0.118577	0.0671937	0.083004	0	0.13834	0.0513834	0.134387	0.083004	0.146245	0.395257	0.450593	0.434783	0.43083	0.426877	0.371542	0.43083	0.418972	0.407115	0.312253	0.367589	0.395257	0.458498	0.466403	0.426877	0.403162	0.462451	0.454545	0.442688	0.403162	0.442688	0.545455	0.422925	0.343874	0.474308	0.43083	0.407115	0.332016	0.490119	0.391304	0.442688	0.466403	0.517787	0.438735	0.418972	0.486166	0.454545
C*01:16	0.110672	0.13834	0.162055	0.193676	0.142292	0.158103	0.13834	0	0.126482	0.0948617	0.158103	0.106719	0.411067	0.466403	0.450593	0.44664	0.442688	0.387352	0.44664	0.434783	0.422925	0.328063	0.383399	0.411067	0.505929	0.513834	0.474308	0.450593	0.509881	0.501976	0.490119	0.450593	0.490119	0.573123	0.450593	0.391304	0.521739	0.458498	0.387352	0.41502	0.537549	0.438735	0.490119	0.44664	0.565217	0.486166	0.466403	0.533597	0.434783
C*01:17	0.0237154	0.0513834	0.189723	0.106719	0.055336	0.0711462	0.0513834	0.126482	0	0.12253	0.0711462	0.106719	0.438735	0.494071	0.478261	0.474308	0.470356	0.41502	0.474308	0.462451	0.450593	0.355731	0.411067	0.438735	0.466403	0.474308	0.434783	0.411067	0.470356	0.462451	0.450593	0.411067	0.450593	0.533597	0.411067	0.351779	0.482213	0.418972	0.387352	0.375494	0.498024	0.399209	0.422925	0.474308	0.525692	0.44664	0.426877	0.494071	0.462451
C*01:18	0.106719	0.134387	0.158103	0.189723	0.13834	0.15415	0.134387	0.0948617	0.12253	0	0.15415	0.102767	0.407115	0.462451	0.44664	0.442688	0.438735	0.383399	0.442688	0.43083	0.418972	0.324111	0.379447	0.407115	0.501976	0.509881	0.470356	0.44664	0.505929	0.498024	0.486166	0.44664	0.486166	0.56917	0.44664	0.387352	0.517787	0.454545	0.383399	0.411067	0.533597	0.434783	0.486166	0.442688	0.561265	0.482213	0.462451	0.529644	0.43083
C*01:22	0.055336	0.083004	0.189723	0.13834	0.0869565	0.102767	0.083004	0.158103	0.0711462	0.15415	0	0.166008	0.438735	0.434783	0.478261	0.474308	0.470356	0.41502	0.474308	0.403162	0.391304	0.355731	0.411067	0.438735	0.407115	0.41502	0.375494	0.351779	0.411067	0.403162	0.391304	0.351779	0.391304	0.474308	0.351779	0.29249	0.422925	0.418972	0.355731	0.316206	0.438735	0.339921	0.391304	0.41502	0.466403	0.387352	0.458498	0.434783	0.403162
C*01:23	0.118577	0.146245	0.16996	0.201581	0.150198	0.166008	0.146245	0.106719	0.106719	0.102767	0.166008	0	0.418972	0.474308	0.458498	0.454545	0.450593	0.395257	0.454545	0.442688	0.43083	0.335968	0.391304	0.418972	0.513834	0.521739	0.482213	0.458498	0.517787	0.509881	0.498024	0.458498	0.498024	0.581028	0.458498	0.399209	0.529644	0.466403	0.367589	0.422925	0.545455	0.44664	0.470356	0.454545	0.573123	0.494071	0.474308	0.541502	0.442688
C*02:02	0.422925	0.43083	0.324111	0.411067	0.454545	0.470356	0.395257	0.411067	0.438735	0.407115	0.438735	0.418972	0	0.13834	0.0869565	0.118577	0.0909091	0.0711462	0.12253	0.106719	0.162055	0.114625	0.0790514	0.114625	0.375494	0.466403	0.426877	0.418972	0.462451	0.395257	0.442688	0.403162	0.411067	0.462451	0.339921	0.411067	0.426877	0.395257	0.355731	0.332016	0.407115	0.462451	0.442688	0.482213	0.434783	0.438735	0.450593	0.486166	0.387352
C*02:03	0.478261	0.486166	0.41502	0.466403	0.44664	0.525692	0.450593	0.466403	0.494071	0.462451	0.434783	0.474308	0.13834	0	0.177866	0.209486	0.181818	0.162055	0.213439	0.102767	0.126482	0.205534	0.16996	0.142292	0.371542	0.462451	0.422925	0.41502	0.458498	0.391304	0.438735	0.399209	0.407115	0.426877	0.335968	0.407115	0.422925	0.486166	0.351779	0.328063	0.339921	0.458498	0.438735	0.478261	0.43083	0.434783	0.505929	0.482213	0.383399
C*02:04	0.462451	0.470356	0.363636	0.450593	0.494071	0.509881	0.434783	0.450593	0.478261	0.44664	0.478261	0.458498	0.0869565	0.177866	0	0.158103	0.130435	0.110672	0.162055	0.146245	0.201581	0.15415	0.118577	0.15415	0.41502	0.505929	0.466403	0.458498	0.501976	0.434783	0.482213	0.442688	0.450593	0.501976	0.379447	0.450593	0.466403	0.434783	0.395257	0.371542	0.44664	0.501976	0.482213	0.521739	0.474308	0.478261	0.490119	0.525692	0.426877
C*02:06	0.458498	0.454545	0.395257	0.44664	0.490119	0.505929	0.43083	0.44664	0.474308	0.442688	0.474308	0.454545	0.118577	0.209486	0.158103	0	0.150198	0.142292	0.193676	0.177866	0.233202	0.150198	0.150198	0.185771	0.44664	0.501976	0.462451	0.454545	0.498024	0.43083	0.478261	0.438735	0.44664	0.533597	0.411067	0.44664	0.426877	0.43083	0.391304	0.367589	0.478261	0.498024	0.478261	0.517787	0.505929	0.474308	0.486166	0.521739	0.422925
C*02:07	0.454545	0.450593	0.367589	0.442688	0.486166	0.501976	0.426877	0.442688	0.470356	0.438735	0.470356	0.450593	0.0909091	0.181818	0.130435	0.150198	0	0.114625	0.166008	0.150198	0.205534	0.146245	0.12253	0.158103	0.418972	0.498024	0.458498	0.450593	0.466403	0.426877	0.474308	0.434783	0.442688	0.505929	0.383399	0.442688	0.458498	0.426877	0.387352	0.363636	0.450593	0.494071	0.474308	0.513834	0.478261	0.470356	0.482213	0.517787	0.418972
C*02:08	0.399209	0.407115	0.300395	0.387352	0.43083	0.44664	0.371542	0.387352	0.41502	0.383399	0.41502	0.395257	0.0711462	0.162055	0.110672	0.142292	0.114625	0	0.146245	0.130435	0.185771	0.13834	0.102767	0.13834	0.399209	0.490119	0.450593	0.442688	0.486166	0.418972	0.466403	0.426877	0.434783	0.486166	0.363636	0.434783	0.450593	0.418972	0.379447	0.355731	0.43083	0.438735	0.466403	0.458498	0.458498	0.462451	0.474308	0.509881	0.411067
C*02:14	0.458498	0.466403	0.359684	0.44664	0.490119	0.505929	0.43083	0.44664	0.474308	0.442688	0.474308	0.454545	0.12253	0.213439	0.162055	0.193676	0.166008	0.146245	0	0.181818	0.209486	0.162055	0.15415	0.162055	0.422925	0.513834	0.474308	0.466403	0.509881	0.442688	0.490119	0.450593	0.458498	0.509881	0.387352	0.458498	0.474308	0.442688	0.403162	0.379447	0.454545	0.509881	0.490119	0.426877	0.482213	0.486166	0.498024	0.533597	0.434783
C*02:16	0.44664	0.454545	0.383399	0.434783	0.478261	0.494071	0.418972	0.434783	0.462451	0.43083	0.403162	0.442688	0.106719	0.102767	0.146245	0.177866	0.150198	0.130435	0.181818	0	0.126482	0.173913	0.13834	0.173913	0.339921	0.43083	0.391304	0.383399	0.426877	0.359684	0.407115	0.367589	0.375494	0.426877	0.304348	0.375494	0.391304	0.454545	0.320158	0.296443	0.371542	0.426877	0.407115	0.44664	0.399209	0.403162	0.474308	0.450593	0.351779
C*02:18	0.434783	0.442688	0.371542	0.422925	0.434783	0.482213	0.407115	0.422925	0.450593	0.418972	0.391304	0.43083	0.162055	0.126482	0.201581	0.233202	0.205534	0.185771	0.209486	0.126482	0	0.162055	0.193676	0.130435	0.328063	0.418972	0.379447	0.371542	0.41502	0.347826	0.395257	0.355731	0.363636	0.379447	0.29249	0.363636	0.379447	0.442688	0.3083	0.284585	0.328063	0.41502	0.395257	0.434783	0.387352	0.391304	0.462451	0.438735	0.339921
C*02:19	0.339921	0.367589	0.324111	0.328063	0.371542	0.387352	0.312253	0.328063	0.355731	0.324111	0.355731	0.335968	0.114625	0.205534	0.15415	0.150198	0.146245	0.13834	0.162055	0.173913	0.162055	0	0.146245	0.114625	0.375494	0.383399	0.343874	0.335968	0.379447	0.312253	0.359684	0.320158	0.328063	0.462451	0.339921	0.328063	0.391304	0.312253	0.272727	0.249012	0.407115	0.379447	0.359684	0.399209	0.434783	0.355731	0.367589	0.403162	0.304348
C*02:27	0.395257	0.403162	0.296443	0.383399	0.426877	0.442688	0.367589	0.383399	0.411067	0.379447	0.411067	0.391304	0.0790514	0.16996	0.118577	0.150198	0.12253	0.102767	0.15415	0.13834	0.193676	0.146245	0	0.146245	0.347826	0.438735	0.399209	0.391304	0.434783	0.426877	0.41502	0.375494	0.41502	0.434783	0.312253	0.383399	0.399209	0.367589	0.328063	0.304348	0.379447	0.434783	0.41502	0.454545	0.407115	0.411067	0.422925	0.458498	0.359684
C*02:28	0.422925	0.43083	0.324111	0.411067	0.391304	0.470356	0.395257	0.411067	0.438735	0.407115	0.438735	0.418972	0.114625	0.142292	0.15415	0.185771	0.158103	0.13834	0.162055	0.173913	0.130435	0.114625	0.146245	0	0.375494	0.466403	0.426877	0.418972	0.462451	0.395257	0.442688	0.403162	0.411067	0.43083	0.339921	0.411067	0.426877	0.395257	0.355731	0.332016	0.343874	0.462451	0.442688	0.482213	0.434783	0.438735	0.450593	0.486166	0.387352
C*03:02	0.450593	0.458498	0.454545	0.438735	0.482213	0.498024	0.458498	0.505929	0.466403	0.501976	0.407115	0.513834	0.375494	0.371542	0.41502	0.44664	0.418972	0.399209	0.422925	0.339921	0.328063	0.375494	0.347826	0.375494	0	0.158103	0.118577	0.15415	0.15415	0.146245	0.134387	0.13834	0.134387	0.201581	0.126482	0.146245	0.118577	0.229249	0.252964	0.201581	0.0988142	0.15415	0.134387	0.335968	0.126482	0.130435	0.201581	0.177866	0.241107
C*03:03	0.458498	0.486166	0.545455	0.44664	0.490119	0.505929	0.466403	0.513834	0.474308	0.509881	0.41502	0.521739	0.466403	0.462451	0.505929	0.501976	0.498024	0.490119	0.513834	0.43083	0.418972	0.383399	0.438735	0.466403	0.158103	0	0.0869565	0.162055	0.12253	0.114625	0.102767	0.106719	0.102767	0.252964	0.217391	0.15415	0.134387	0.110672	0.26087	0.16996	0.189723	0.12253	0.102767	0.217391	0.0909091	0.0988142	0.083004	0.0592885	0.209486
C*03:04	0.418972	0.44664	0.505929	0.407115	0.450593	0.466403	0.426877	0.474308	0.434783	0.470356	0.375494	0.482213	0.426877	0.422925	0.466403	0.462451	0.458498	0.450593	0.474308	0.391304	0.379447	0.343874	0.399209	0.426877	0.118577	0.0869565	0	0.12253	0.083004	0.0750988	0.0632411	0.0671937	0.0632411	0.213439	0.177866	0.114625	0.0948617	0.158103	0.221344	0.130435	0.150198	0.083004	0.0632411	0.264822	0.13834	0.0592885	0.130435	0.106719	0.16996
C*03:05	0.395257	0.422925	0.482213	0.399209	0.426877	0.442688	0.403162	0.450593	0.411067	0.44664	0.351779	0.458498	0.418972	0.41502	0.458498	0.454545	0.450593	0.442688	0.466403	0.383399	0.371542	0.335968	0.391304	0.418972	0.15415	0.162055	0.12253	0	0.158103	0.150198	0.13834	0.142292	0.13834	0.288538	0.213439	0.0909091	0.16996	0.233202	0.162055	0.205534	0.185771	0.158103	0.13834	0.339921	0.213439	0.134387	0.205534	0.181818	0.245059
C*03:06	0.454545	0.470356	0.541502	0.442688	0.486166	0.501976	0.462451	0.509881	0.470356	0.505929	0.411067	0.517787	0.462451	0.458498	0.501976	0.498024	0.466403	0.486166	0.509881	0.426877	0.41502	0.379447	0.434783	0.462451	0.15415	0.12253	0.083004	0.158103	0	0.110672	0.0988142	0.102767	0.0988142	0.249012	0.213439	0.150198	0.130435	0.193676	0.256917	0.166008	0.185771	0.118577	0.0988142	0.300395	0.173913	0.0948617	0.166008	0.142292	0.205534
C*03:07	0.44664	0.474308	0.533597	0.434783	0.478261	0.494071	0.454545	0.501976	0.462451	0.498024	0.403162	0.509881	0.395257	0.391304	0.434783	0.43083	0.426877	0.418972	0.442688	0.359684	0.347826	0.312253	0.426877	0.395257	0.146245	0.114625	0.0750988	0.150198	0.110672	0	0.0909091	0.0948617	0.0592885	0.241107	0.205534	0.142292	0.12253	0.185771	0.249012	0.158103	0.177866	0.110672	0.0909091	0.29249	0.166008	0.0869565	0.158103	0.134387	0.197628
C*03:08	0.434783	0.462451	0.521739	0.422925	0.466403	0.482213	0.442688	0.490119	0.450593	0.486166	0.391304	0.498024	0.442688	0.438735	0.482213	0.478261	0.474308	0.466403	0.490119	0.407115	0.395257	0.359684	0.41502	0.442688	0.134387	0.102767	0.0632411	0.13834	0.0988142	0.0909091	0	0.083004	0.0790514	0.229249	0.193676	0.130435	0.110672	0.173913	0.237154	0.146245	0.166008	0.0988142	0.0790514	0.280632	0.15415	0.0750988	0.146245	0.12253	0.185771
C*03:09	0.395257	0.422925	0.482213	0.383399	0.426877	0.442688	0.403162	0.450593	0.411067	0.44664	0.351779	0.458498	0.403162	0.399209	0.442688	0.438735	0.434783	0.426877	0.450593	0.367589	0.355731	0.320158	0.375494	0.403162	0.13834	0.106719	0.0671937	0.142292	0.102767	0.0948617	0.083004	0	0.083004	0.233202	0.197628	0.134387	0.114625	0.177866	0.241107	0.150198	0.16996	0.102767	0.083004	0.284585	0.158103	0.0790514	0.150198	0.126482	0.189723
C*03:10	0.434783	0.462451	0.521739	0.422925	0.466403	0.482213	0.442688	0.490119	0.450593	0.486166	0.391304	0.498024	0.411067	0.407115	0.450593	0.44664	0.442688	0.434783	0.458498	0.375494	0.363636	0.328063	0.41502	0.411067	0.134387	0.102767	0.0632411	0.13834	0.0988142	0.0592885	0.0790514	0.083004	0	0.229249	0.193676	0.130435	0.110672	0.173913	0.237154	0.146245	0.166008	0.0988142	0.0790514	0.280632	0.15415	0.0750988	0.146245	0.12253	0.185771
C*03:14	0.517787	0.525692	0.521739	0.505929	0.517787	0.565217	0.545455	0.573123	0.533597	0.56917	0.474308	0.581028	0.462451	0.426877	0.501976	0.533597	0.505929	0.486166	0.509881	0.426877	0.379447	0.462451	0.434783	0.43083	0.201581	0.252964	0.213439	0.288538	0.249012	0.241107	0.229249	0.233202	0.229249	0	0.193676	0.280632	0.213439	0.256917	0.387352	0.249012	0.201581	0.249012	0.229249	0.43083	0.221344	0.225296	0.296443	0.272727	0.335968
C*03:16	0.395257	0.403162	0.399209	0.383399	0.426877	0.442688	0.422925	0.450593	0.411067	0.44664	0.351779	0.458498	0.339921	0.335968	0.379447	0.411067	0.383399	0.363636	0.387352	0.304348	0.29249	0.339921	0.312253	0.339921	0.126482	0.217391	0.177866	0.213439	0.213439	0.205534	0.193676	0.197628	0.193676	0.193676	0	0.205534	0.177866	0.221344	0.312253	0.213439	0.158103	0.213439	0.193676	0.395257	0.185771	0.189723	0.26087	0.237154	0.300395
C*03:17	0.335968	0.363636	0.422925	0.391304	0.367589	0.383399	0.343874	0.391304	0.351779	0.387352	0.29249	0.399209	0.411067	0.407115	0.450593	0.44664	0.442688	0.434783	0.458498	0.375494	0.363636	0.328063	0.383399	0.411067	0.146245	0.15415	0.114625	0.0909091	0.150198	0.142292	0.130435	0.134387	0.130435	0.280632	0.205534	0	0.162055	0.225296	0.189723	0.197628	0.177866	0.150198	0.130435	0.332016	0.205534	0.126482	0.197628	0.173913	0.237154
C*03:19	0.466403	0.462451	0.505929	0.454545	0.498024	0.513834	0.474308	0.521739	0.482213	0.517787	0.422925	0.529644	0.426877	0.422925	0.466403	0.426877	0.458498	0.450593	0.474308	0.391304	0.379447	0.391304	0.399209	0.426877	0.118577	0.134387	0.0948617	0.16996	0.130435	0.12253	0.110672	0.114625	0.110672	0.213439	0.177866	0.162055	0	0.205534	0.268775	0.177866	0.150198	0.130435	0.110672	0.312253	0.13834	0.106719	0.177866	0.15415	0.217391
C*03:21	0.403162	0.43083	0.454545	0.391304	0.434783	0.450593	0.43083	0.458498	0.418972	0.454545	0.418972	0.466403	0.395257	0.486166	0.434783	0.43083	0.426877	0.418972	0.442688	0.454545	0.442688	0.312253	0.367589	0.395257	0.229249	0.110672	0.158103	0.233202	0.193676	0.185771	0.173913	0.177866	0.173913	0.256917	0.221344	0.225296	0.205534	0	0.332016	0.193676	0.26087	0.193676	0.173913	0.288538	0.162055	0.16996	0.0948617	0.130435	0.280632
C*03:27	0.399209	0.426877	0.418972	0.403162	0.43083	0.44664	0.407115	0.387352	0.387352	0.383399	0.355731	0.367589	0.355731	0.351779	0.395257	0.391304	0.387352	0.379447	0.403162	0.320158	0.3083	0.272727	0.328063	0.355731	0.252964	0.26087	0.221344	0.162055	0.256917	0.249012	0.237154	0.241107	0.237154	0.387352	0.312253	0.189723	0.268775	0.332016	0	0.209486	0.284585	0.256917	0.209486	0.27668	0.312253	0.233202	0.304348	0.280632	0.181818
C*03:34	0.359684	0.387352	0.44664	0.347826	0.391304	0.407115	0.332016	0.41502	0.375494	0.411067	0.316206	0.422925	0.332016	0.328063	0.371542	0.367589	0.363636	0.355731	0.379447	0.296443	0.284585	0.249012	0.304348	0.332016	0.201581	0.16996	0.130435	0.205534	0.166008	0.158103	0.146245	0.150198	0.146245	0.249012	0.213439	0.197628	0.177866	0.193676	0.209486	0	0.233202	0.166008	0.146245	0.252964	0.221344	0.142292	0.213439	0.189723	0.158103
C*03:36	0.482213	0.490119	0.486166	0.470356	0.450593	0.529644	0.490119	0.537549	0.498024	0.533597	0.438735	0.545455	0.407115	0.339921	0.44664	0.478261	0.450593	0.43083	0.454545	0.371542	0.328063	0.407115	0.379447	0.343874	0.0988142	0.189723	0.150198	0.185771	0.185771	0.177866	0.166008	0.16996	0.166008	0.201581	0.158103	0.177866	0.150198	0.26087	0.284585	0.233202	0	0.185771	0.166008	0.367589	0.158103	0.162055	0.233202	0.209486	0.272727
C*03:37	0.383399	0.411067	0.470356	0.371542	0.41502	0.43083	0.391304	0.438735	0.399209	0.434783	0.339921	0.44664	0.462451	0.458498	0.501976	0.498024	0.494071	0.438735	0.509881	0.426877	0.41502	0.379447	0.434783	0.462451	0.15415	0.12253	0.083004	0.158103	0.118577	0.110672	0.0988142	0.102767	0.0988142	0.249012	0.213439	0.150198	0.130435	0.193676	0.256917	0.166008	0.185771	0	0.0988142	0.229249	0.173913	0.0948617	0.166008	0.142292	0.205534
C*03:38	0.434783	0.462451	0.521739	0.422925	0.466403	0.482213	0.442688	0.490119	0.422925	0.486166	0.391304	0.470356	0.442688	0.438735	0.482213	0.478261	0.474308	0.466403	0.490119	0.407115	0.395257	0.359684	0.41502	0.442688	0.134387	0.102767	0.0632411	0.13834	0.0988142	0.0909091	0.0790514	0.083004	0.0790514	0.229249	0.193676	0.130435	0.110672	0.173913	0.209486	0.146245	0.166008	0.0988142	0	0.280632	0.15415	0.0750988	0.146245	0.12253	0.185771
C*03:39	0.458498	0.486166	0.478261	0.44664	0.490119	0.505929	0.466403	0.44664	0.474308	0.442688	0.41502	0.454545	0.482213	0.478261	0.521739	0.517787	0.513834	0.458498	0.426877	0.44664	0.434783	0.399209	0.454545	0.482213	0.335968	0.217391	0.264822	0.339921	0.300395	0.29249	0.280632	0.284585	0.280632	0.43083	0.395257	0.332016	0.312253	0.288538	0.27668	0.252964	0.367589	0.229249	0.280632	0	0.268775	0.27668	0.26087	0.237154	0.225296
C*03:43	0.509881	0.517787	0.513834	0.498024	0.541502	0.557312	0.517787	0.565217	0.525692	0.561265	0.466403	0.573123	0.434783	0.43083	0.474308	0.505929	0.478261	0.458498	0.482213	0.399209	0.387352	0.434783	0.407115	0.434783	0.126482	0.0909091	0.13834	0.213439	0.173913	0.166008	0.15415	0.158103	0.15415	0.221344	0.185771	0.205534	0.13834	0.162055	0.312253	0.221344	0.158103	0.173913	0.15415	0.268775	0	0.150198	0.134387	0.110672	0.26087
C*03:44	0.43083	0.458498	0.517787	0.418972	0.462451	0.478261	0.438735	0.486166	0.44664	0.482213	0.387352	0.494071	0.438735	0.434783	0.478261	0.474308	0.470356	0.462451	0.486166	0.403162	0.391304	0.355731	0.411067	0.438735	0.130435	0.0988142	0.0592885	0.134387	0.0948617	0.0869565	0.0750988	0.0790514	0.0750988	0.225296	0.189723	0.126482	0.106719	0.16996	0.233202	0.142292	0.162055	0.0948617	0.0750988	0.27668	0.150198	0	0.142292	0.118577	0.181818
C*03:49	0.411067	0.438735	0.529644	0.399209	0.442688	0.458498	0.418972	0.466403	0.426877	0.462451	0.458498	0.474308	0.450593	0.505929	0.490119	0.486166	0.482213	0.474308	0.498024	0.474308	0.462451	0.367589	0.422925	0.450593	0.201581	0.083004	0.130435	0.205534	0.166008	0.158103	0.146245	0.150198	0.146245	0.296443	0.26087	0.197628	0.177866	0.0948617	0.304348	0.213439	0.233202	0.166008	0.146245	0.26087	0.134387	0.142292	0	0.102767	0.252964
C*03:56	0.478261	0.505929	0.565217	0.466403	0.509881	0.525692	0.486166	0.533597	0.494071	0.529644	0.434783	0.541502	0.486166	0.482213	0.525692	0.521739	0.517787	0.509881	0.533597	0.450593	0.438735	0.403162	0.458498	0.486166	0.177866	0.0592885	0.106719	0.181818	0.142292	0.134387	0.12253	0.126482	0.12253	0.272727	0.237154	0.173913	0.15415	0.130435	0.280632	0.189723	0.209486	0.142292	0.12253	0.237154	0.110672	0.118577	0.102767	0	0.229249
C*03:57	0.44664	0.474308	0.466403	0.434783	0.478261	0.494071	0.454545	0.434783	0.462451	0.43083	0.403162	0.442688	0.387352	0.383399	0.426877	0.422925	0.418972	0.411067	0.434783	0.351779	0.339921	0.304348	0.359684	0.387352	0.241107	0.209486	0.16996	0.245059	0.205534	0.197628	0.185771	0.189723	0.185771	0.335968	0.300395	0.237154	0.217391	0.280632	0.181818	0.158103	0.272727	0.205534	0.185771	0.225296	0.26087	0.181818	0.252964	0.229249	0
C*03:60	0.458498	0.466403	0.395257	0.44664	0.490119	0.505929	0.466403	0.44664	0.474308	0.442688	0.41502	0.411067	0.316206	0.312253	0.355731	0.387352	0.359684	0.339921	0.363636	0.280632	0.268775	0.316206	0.288538	0.316206	0.16996	0.26087	0.221344	0.256917	0.256917	0.249012	0.237154	0.241107	0.237154	0.304348	0.229249	0.249012	0.221344	0.332016	0.193676	0.209486	0.201581	0.256917	0.237154	0.27668	0.229249	0.233202	0.304348	0.280632	0.181818
C*03:78	0.391304	0.418972	0.438735	0.379447	0.422925	0.438735	0.399209	0.379447	0.407115	0.375494	0.375494	0.387352	0.359684	0.355731	0.399209	0.395257	0.391304	0.383399	0.407115	0.324111	0.312253	0.27668	0.332016	0.359684	0.213439	0.181818	0.142292	0.217391	0.177866	0.16996	0.158103	0.162055	0.158103	0.3083	0.272727	0.209486	0.189723	0.252964	0.15415	0.130435	0.245059	0.177866	0.158103	0.197628	0.233202	0.15415	0.197628	0.201581	0.102767
C*03:88	0.482213	0.509881	0.56917	0.470356	0.513834	0.529644	0.490119	0.537549	0.498024	0.533597	0.438735	0.545455	0.490119	0.486166	0.529644	0.525692	0.521739	0.513834	0.537549	0.454545	0.442688	0.407115	0.462451	0.490119	0.181818	0.0632411	0.110672	0.185771	0.146245	0.13834	0.126482	0.130435	0.126482	0.27668	0.241107	0.177866	0.158103	0.134387	0.284585	0.193676	0.213439	0.146245	0.126482	0.241107	0.114625	0.12253	0.106719	0.083004	0.233202
C*03:94	0.158103	0.185771	0.209486	0.241107	0.189723	0.205534	0.185771	0.146245	0.173913	0.142292	0.205534	0.15415	0.296443	0.351779	0.335968	0.332016	0.328063	0.320158	0.343874	0.320158	0.3083	0.213439	0.268775	0.296443	0.391304	0.399209	0.359684	0.335968	0.395257	0.387352	0.375494	0.335968	0.375494	0.458498	0.335968	0.27668	0.407115	0.343874	0.272727	0.300395	0.422925	0.395257	0.375494	0.41502	0.450593	0.371542	0.351779	0.418972	0.320158
C*04:01	0.442688	0.418972	0.541502	0.407115	0.474308	0.490119	0.470356	0.498024	0.43083	0.494071	0.490119	0.434783	0.509881	0.565217	0.549407	0.533597	0.529644	0.486166	0.486166	0.533597	0.521739	0.44664	0.541502	0.509881	0.501976	0.529644	0.490119	0.482213	0.513834	0.458498	0.505929	0.466403	0.474308	0.56917	0.44664	0.474308	0.505929	0.474308	0.55336	0.525692	0.533597	0.478261	0.478261	0.588933	0.561265	0.501976	0.482213	0.549407	0.612648
C*04:03	0.411067	0.387352	0.509881	0.375494	0.442688	0.458498	0.438735	0.466403	0.399209	0.462451	0.458498	0.403162	0.351779	0.407115	0.391304	0.375494	0.371542	0.375494	0.399209	0.375494	0.363636	0.288538	0.383399	0.351779	0.379447	0.407115	0.367589	0.359684	0.391304	0.335968	0.383399	0.343874	0.351779	0.44664	0.324111	0.351779	0.383399	0.351779	0.43083	0.403162	0.411067	0.403162	0.355731	0.58498	0.438735	0.379447	0.359684	0.426877	0.490119
C*04:04	0.490119	0.466403	0.557312	0.454545	0.521739	0.537549	0.517787	0.545455	0.478261	0.541502	0.44664	0.482213	0.525692	0.521739	0.565217	0.549407	0.545455	0.501976	0.501976	0.490119	0.478261	0.462451	0.557312	0.525692	0.458498	0.486166	0.44664	0.438735	0.470356	0.41502	0.462451	0.422925	0.43083	0.525692	0.403162	0.43083	0.462451	0.490119	0.509881	0.482213	0.490119	0.434783	0.434783	0.545455	0.517787	0.458498	0.529644	0.505929	0.56917
C*04:06	0.458498	0.434783	0.525692	0.422925	0.490119	0.505929	0.486166	0.513834	0.44664	0.509881	0.41502	0.450593	0.367589	0.363636	0.407115	0.391304	0.387352	0.391304	0.41502	0.332016	0.320158	0.304348	0.399209	0.367589	0.335968	0.363636	0.324111	0.316206	0.347826	0.29249	0.339921	0.300395	0.3083	0.403162	0.280632	0.3083	0.339921	0.367589	0.387352	0.359684	0.367589	0.359684	0.312253	0.541502	0.395257	0.335968	0.407115	0.383399	0.44664
C*04:07	0.426877	0.403162	0.525692	0.391304	0.458498	0.474308	0.454545	0.482213	0.41502	0.478261	0.474308	0.418972	0.494071	0.549407	0.533597	0.517787	0.513834	0.470356	0.470356	0.517787	0.505929	0.43083	0.525692	0.494071	0.486166	0.513834	0.474308	0.466403	0.498024	0.442688	0.490119	0.450593	0.458498	0.55336	0.43083	0.458498	0.490119	0.458498	0.537549	0.509881	0.517787	0.462451	0.462451	0.573123	0.545455	0.486166	0.466403	0.533597	0.596838
C*04:08	0.474308	0.450593	0.573123	0.438735	0.505929	0.521739	0.482213	0.529644	0.462451	0.525692	0.521739	0.466403	0.521739	0.577075	0.561265	0.545455	0.541502	0.498024	0.498024	0.545455	0.533597	0.458498	0.55336	0.521739	0.466403	0.494071	0.454545	0.44664	0.478261	0.422925	0.470356	0.43083	0.438735	0.600791	0.478261	0.438735	0.470356	0.505929	0.517787	0.537549	0.498024	0.442688	0.442688	0.55336	0.525692	0.466403	0.44664	0.513834	0.577075
C*04:10	0.426877	0.403162	0.525692	0.391304	0.458498	0.474308	0.454545	0.482213	0.442688	0.478261	0.474308	0.44664	0.494071	0.549407	0.533597	0.517787	0.513834	0.470356	0.470356	0.517787	0.505929	0.43083	0.525692	0.494071	0.486166	0.513834	0.474308	0.466403	0.498024	0.442688	0.490119	0.450593	0.458498	0.55336	0.43083	0.458498	0.490119	0.458498	0.565217	0.509881	0.517787	0.462451	0.490119	0.573123	0.545455	0.486166	0.466403	0.533597	0.596838
C*04:13	0.509881	0.486166	0.577075	0.474308	0.509881	0.557312	0.537549	0.565217	0.498024	0.561265	0.466403	0.501976	0.545455	0.509881	0.58498	0.56917	0.565217	0.521739	0.521739	0.509881	0.462451	0.482213	0.577075	0.513834	0.478261	0.505929	0.466403	0.458498	0.490119	0.434783	0.482213	0.442688	0.450593	0.509881	0.422925	0.450593	0.482213	0.509881	0.529644	0.501976	0.478261	0.454545	0.454545	0.565217	0.537549	0.478261	0.549407	0.525692	0.588933
C*04:19	0.454545	0.43083	0.55336	0.418972	0.486166	0.501976	0.482213	0.509881	0.442688	0.505929	0.501976	0.44664	0.521739	0.577075	0.561265	0.545455	0.541502	0.498024	0.498024	0.545455	0.533597	0.458498	0.55336	0.521739	0.513834	0.541502	0.501976	0.494071	0.525692	0.470356	0.517787	0.478261	0.486166	0.581028	0.458498	0.486166	0.517787	0.486166	0.565217	0.537549	0.545455	0.490119	0.490119	0.600791	0.573123	0.513834	0.494071	0.561265	0.624506
C*04:26	0.355731	0.332016	0.454545	0.320158	0.387352	0.403162	0.383399	0.411067	0.343874	0.407115	0.403162	0.347826	0.44664	0.501976	0.486166	0.470356	0.466403	0.422925	0.422925	0.470356	0.458498	0.383399	0.478261	0.44664	0.533597	0.561265	0.521739	0.513834	0.545455	0.490119	0.537549	0.498024	0.505929	0.600791	0.478261	0.505929	0.537549	0.505929	0.490119	0.462451	0.565217	0.509881	0.509881	0.525692	0.592885	0.533597	0.513834	0.581028	0.549407
[truncated: 138 more rows]
[truncated: 152 more columns]

## Sheet: DRB1_sequence_distance_matrix
	DRB1*01:01	DRB1*01:02	DRB1*01:03	DRB1*01:07	DRB1*01:10	DRB1*01:19	DRB1*01:20	DRB1*01:23	DRB1*03:01	DRB1*03:02	DRB1*03:03	DRB1*03:04	DRB1*03:05	DRB1*03:06	DRB1*03:07	DRB1*03:13	DRB1*03:14	DRB1*03:15	DRB1*03:16	DRB1*03:18	DRB1*03:19	DRB1*03:23	DRB1*03:27	DRB1*03:28	DRB1*03:32	DRB1*03:38	DRB1*03:39	DRB1*03:54	DRB1*03:60	DRB1*03:64	DRB1*04:01	DRB1*04:02	DRB1*04:03	DRB1*04:04	DRB1*04:05	DRB1*04:06	DRB1*04:07	DRB1*04:08	DRB1*04:09	DRB1*04:10	DRB1*04:11	DRB1*04:13	DRB1*04:14	DRB1*04:15	DRB1*04:16	DRB1*04:17	DRB1*04:18	DRB1*04:19	DRB1*04:22
[truncated: 272 more rows]
[truncated: 223 more columns]

[truncated: 4 more sheets: A_motif_distance_matrix, B_motif_distance_matrix, C_motif_distance_matrix, DRB1_motif_distance_matrix]
